# Supplementary material for: PUMILIO Proteins in Colorectal Cancer: Tumor Growth Promoting Function and Potential as Therapeutic Targets
Source: Research Square preprint supplement (doi:10.21203/rs.3.rs-199046/v1), 2021-02-11
Supplement: Supplementary file 1 [file 00f3e3f1a29fcc1d7c651d05.xlsx]

## Sheet: Sheet1
Table S5. Upregulated proteins in Pum2-/- HCT116 cells
Gene	WT-1	WT-2	Pum2-/--1	Pum2-/--2
AACS	1.03811	0.942263	1.20323	1.16282
AAK1	0.98232	0.858564	1.12376	1.11713
AASS	0.976	0.868571	1.39771	1.24
ABI2	1.10739	1.01155	1.24711	1.24018
ABRACL	1.16246	0.954248	1.23903	1.23716
ACAP3	0.181707	0.710252	0.581338	0.731123
ACBD7	1.26721	0.967213	2.06721	1.63115
ACTN1	1.02217	0.858374	1.3202	1.06773
ADD1	0.996622	0.933559	1.19144	1.22973
ADD3	1.11152	1.00735	1.25245	1.34681
ADI1	0.990395	0.965848	1.15048	1.12273
AFP	0.861781	0.705937	0.963822	0.898887
AGFG2	0.795332	0.913824	0.932675	1.09964
AGPAT2	0.785417	1.02917	1.16563	1.12396
AHNAK	1.02244	0.897616	1.52314	1.30435
AIFM2	0.965922	0.934195	1.17274	1.12221
AJUBA	0.983069	0.951323	1.13333	1.17143
AK1	1.06043	0.989279	1.16764	1.21442
AKNA	0.856359	0.973468	1.27447	0.907594
ALCAM	0.982644	1.00267	1.26302	1.27637
ALDH4A1	0.984934	1.01507	1.22505	1.33145
ALDH5A1	0.979787	0.991489	1.19362	1.24149
ALG11	0.927368	0.922105	1.15053	0.977895
ANKRD13A	0.901235	0.861111	1.0607	1.0607
ANLN	0.973494	0.936145	1.32892	1.3
ANO1	1.0048	0.757503	1.28812	1.03241
ANXA11	0.805858	0.972385	1.08703	1.08033
ANXA3	1.05143	0.962286	1.43771	1.09714
ANXA6	1.00123	0.953086	1.41605	1.32346
APBB1	0.995383	0.719298	1.07479	1.01293
APOA1	1.15675	0.892857	1.24802	1.19246
APOA2	2.07562	0.956975	1.78096	1.83703
ARAP3	0.980473	0.971223	1.09969	1.16958
ARFGAP3	1.00711	0.97724	1.24609	1.26885
ARHGAP18	0.979615	0.91393	1.21178	1.21065
ARHGEF10	0.958951	0.937286	1.23831	1.24743
ARHGEF17	0.815957	0.788298	1.22128	1.09894
ARHGEF40	1.19707	1.13582	1.48202	1.68842
ARHGEF5	1.02652	0.893939	1.03504	1.17803
ARL4C	0.925242	0.491645	1.10378	1.07652
ARMCX3	0.956947	1.07241	1.1184	1.30626
ARRB1	0.888377	1.08976	1.18642	1.18987
ASB9	1.04947	0.624636	1.59942	1.01164
ASRGL1	0.942995	0.881159	1.08116	1.12464
ATG3	0.996475	0.942421	1.19741	1.12926
ATG7	0.935678	0.876382	1.0794	1.0603
ATL3	0.946721	0.822404	1.14344	0.993169
ATM	0.984783	0.965217	1.26957	1.06522
ATP2C1	0.718814	0.807771	1.20757	0.831288
AURKB	1.03119	1.02616	1.18813	1.18209
B2M	1.65472	1.19057	1.5717	1.70566
B3GALTL	1.00617	1.01728	1.20617	1.18519
B3GNT1	0.976296	0.951111	1.14074	1.08889
B4GALT5	0.872682	0.883807	1.12732	1.12608
BAD	1.00519	1.05504	1.30426	1.12461
BBC3	1.08306	1.07541	1.2929	1.49071
BCAM	1.08344	0.974716	1.37168	1.39949
BCL2L12	0.785965	0.650292	1.34737	0.985965
BCL2L2	0.614217	0.716454	0.888179	0.926518
BIRC5	1.03004	1.04457	1.14632	1.4845
BLOC1S2	1.07464	0.891187	1.19424	1.21583
BLOC1S3	1.01836	0.951691	1.12271	1.15556
BLVRA	1.04199	0.98895	1.20552	1.28066
BLVRB	0.971875	0.964583	1.18021	1.15417
BMP2K	0.982888	0.971123	1.22567	1.11551
BOLA1	1.12135	0.907865	1.25281	1.09213
BOLA3	1.07792	1.15584	1.29044	1.27863
BRK1	1.03327	1.00701	1.1655	1.20403
C10orf32	0.917972	0.754839	1.06636	0.938249
C10orf54	1.24462	0.946154	1.68769	1.78923
C12orf23	0.907159	0.969799	1.0906	1.07942
C12orf57	1.11052	0.723176	1.22425	1.0279
C15orf38-AP3S2	1.06268	0.844715	1.35173	1.12348
C15orf52	0.897196	0.990654	1.21963	1.25389
C15orf57	1.08929	0.839286	1.18487	1.24475
C1orf50	1.25638	0.891489	1.29574	1.25851
C2CD4C	0.922144	0.938322	1.16684	1.28413
C3orf37	0.968566	1.01081	1.13261	1.20923
C4orf33	0.931319	0.991758	1.11813	1.24176
C8orf47	1.19902	0.993171	1.28488	1.31024
CA13	1.0276	0.726115	1.30255	1.04565
CA2	1.05037	1.01259	1.19412	1.25918
CACHD1	0.897219	1.03507	1.25877	1.22612
CALCOCO1	1.4573	1.24931	1.69284	1.52755
CALU	1.19827	0.652221	1.24485	0.895991
CAMK1	1.07972	0.857283	1.37008	1.09547
CAP2	0.96283	0.914868	1.27938	1.34053
CAPN6	0.859195	1.49425	2.19828	3.00287
CARHSP1	1.0559	0.785714	1.29296	1.16563
CBR3	0.947434	1.04255	1.24155	1.20901
CBX6	0.876588	1.08984	1.11434	1.19419
CCDC115	0.950082	0.974632	1.24386	0.994272
CCDC82	1.10436	1.05945	1.37517	1.26816
CCDC84	0.993873	0.910539	1.3027	1.24632
CCDC88A	0.828989	0.857143	0.991658	1.0146
CCM2	0.907807	0.871262	1.11462	1.02326
CCNB1	0.961707	1.08972	1.20022	1.32057
CCNB2	0.990815	0.970149	1.1791	1.14351
CCND3	1.0308	0.812115	1.23511	1.06571
CD44	0.992424	1.23485	1.46818	1.36061
CD82	0.992056	0.954987	1.17741	1.25419
CDA	1.06789	1.08055	1.25316	1.42693
CDC25C	1.02275	0.991098	1.20574	1.26904
CDC42BPA	0.977242	0.8166	1.15529	1.10442
CDC42EP2	0.715116	0.741279	1.00581	0.735465
CDCA3	0.982202	0.9099	1.19911	1.30812
CDH3	0.950226	1.00339	1.24661	1.21493
CDK5RAP2	0.947927	0.87946	1.04629	1.081
CDK6	0.792958	0.661972	0.984507	0.915493
CDR2L	0.88961	0.814471	1.0334	0.934137
CENPF	1.0286	0.903602	1.25424	1.19174
CEP44	0.950304	0.998986	1.22515	1.16227
CEP55	0.960997	0.820152	1.12784	1.00758
CEP97	1.00744	0.837407	1.24336	1.16047
CETN2	1.07359	0.951515	1.17835	1.16104
CGNL1	0.892818	0.983425	1.12818	1.21105
CHDH	1.0182	0.990899	1.23549	1.54266
CHKA	1.0261	0.979834	1.2586	1.16963
CHMP1A	1.05473	0.723383	1.24975	0.957214
CHMP4A	1.28972	0.878505	1.60852	0.923157
CHMP4C	0.964326	0.851728	1.3155	0.949833
CHPF2	0.857003	0.854065	1.04995	0.937316
CHST14	1.05746	1.17848	1.37408	1.3423
CIT	1.05281	0.937079	1.22697	1.21236
CKAP2L	0.910314	1.15807	1.23206	1.26906
CLASP1	0.907331	1.0083	1.11342	1.58091
CLIC3	1.11973	0.808163	1.78639	1.68707
CLIC4	1.06047	0.821534	1.40118	1.21386
CLIP1	1.08538	0.894995	1.21001	1.15898
CLIP2	1.0442	0.909392	1.23536	1.19448
CLTA	1.09981	0.798479	1.30418	1.05989
CLU	1.03406	0.793187	1.19465	1.05474
CNIH4	0.715166	1.18496	1.39457	1.51295
CNN2	0.954217	0.879518	1.23735	1.08554
CNN3	1.05669	0.951749	1.18697	1.12545
COA5	0.900724	1.04137	1.06515	1.30507
COL13A1	1.00683	1.14505	1.34471	1.35154
COL6A2	0.93076	0.944381	1.11124	1.09989
COMMD6	0.980493	1.00411	1.12423	1.24641
CORO1A	1.03963	0.984848	1.35548	1.3345
CORO1B	0.973054	0.914172	1.10479	1.07385
COX5B	0.986014	0.993007	1.14452	1.14452
COX6B1	0.949599	0.955326	1.18786	1.15464
CPNE2	1.02299	1.06092	1.41264	1.21149
CPT1A	0.99884	0.964037	1.29466	1.23782
CRAT	1.01963	1.04058	1.4123	1.50785
CRIM1	0.942029	0.881159	1.34783	1.20145
CRIP2	1.03846	1.01857	1.36074	1.50663
CRK	1.19372	0.888528	1.33225	1.18506
CRKL	1.08171	0.935798	1.17996	1.15078
CSPG4	1.05022	0.78821	1.1452	1.07424
CSTB	1.18923	1.10497	1.61188	1.14227
CTDSPL	0.810395	0.575403	0.894583	0.838946
CTSL2	1.01919	0.954853	1.32619	1.13093
CTSZ	1.04684	1.00585	1.1815	1.18618
CUEDC1	0.888335	0.722832	1.18445	1.07876
CUL4B	0.982234	0.904822	1.26777	1.23858
CUL9	0.939638	0.62173	0.953722	0.904427
CXXC5	1.15051	1.47321	1.52168	1.6926
CYB5B	0.892537	1.15522	1.11045	1.48159
CYB5R1	0.919916	0.855638	1.0706	1.03899
CYB5R3	1.01767	1.01649	1.1649	1.22144
CYBRD1	0.930077	1.07088	1.25766	1.31992
CYHR1	0.852022	0.786765	1.00827	0.905331
CYP24A1	1.25346	0.971246	1.28115	1.74015
CYP2S1	0.921406	0.921406	1.14064	1.14374
CYP4F22	0.800456	1.08438	1.07184	1.24173
DAB2IP	1.02599	0.883616	1.21695	1.12203
DAG1	1.11902	0.931436	1.23286	1.2031
DBI	1.13313	1.06808	1.39032	1.42209
DBNL	1.5994	1.47085	2.4574	1.79522
DCAF16	1.20533	1.16426	1.32297	1.50832
DCAF7	0.975348	0.854234	1.10718	1.00536
DCBLD2	0.91062	0.939012	1.09359	1.09464
DCLK2	0.967811	1.02575	1.22747	1.19635
DCUN1D3	1.01811	1.06407	1.38022	1.41365
DDX46	0.449356	0.599328	0.814214	0.55512
DENND4C	0.998922	0.934267	1.12716	1.11315
DENND5B	1.25771	1.20099	1.64858	1.30333
DFFA	1.1443	0.766544	1.23989	1.03125
DFNA5	0.989955	0.986607	1.24554	1.34598
DIAPH3	0.960215	0.97957	1.2086	1.32043
DKK1	0.916509	1.00949	1.27704	1.23529
DLGAP5	1.00892	1.05017	1.21405	1.27536
DMTN	1.09989	0.902411	1.40758	1.17451
DNAJB14	0.951357	1.02262	1.21154	1.20701
DNAJB5	0.692661	0.833716	0.869266	0.925459
DOCK5	1.00401	0.922563	1.18825	1.21762
DPYSL2	1.02749	0.955497	1.31152	1.32068
DTL	0.936789	1.12137	1.13148	1.35272
DTX3L	0.978118	0.977024	1.37856	1.39825
DUSP6	1.21099	0.717582	1.47582	0.964835
DVL2	0.992231	0.973363	1.14095	1.16759
DYNLRB1	1.10514	1.03086	1.23657	1.232
ECE1	0.981842	0.950713	1.19585	1.16602
EHBP1L1	1.01143	0.898129	1.15593	1.12058
EHD2	0.971698	0.876179	1.34788	1.35259
EIF2B1	0.982869	0.968951	1.14561	1.15525
EPHB4	1.00483	1.04222	1.16888	1.23884
EPHX1	0.967975	0.989669	1.18492	1.18698
EPM2AIP1	0.86428	0.920899	1.06245	1.06162
ERAP1	0.954262	0.920998	1.13514	1.14033
ESPL1	0.979381	0.979381	1.12784	1.18144
EVA1B	0.736842	0.826679	0.978221	0.984574
EZH1	0.851282	1.00855	0.952137	1.23846
F3	1.03626	0.933206	1.73855	1.57634
F5	0.903448	1.06092	1.28391	1.3931
FAM101B	0.898291	0.763248	1.3	1.09487
FAM111A	1.06258	1.05174	1.15884	1.284
FAM114A1	1.07788	0.841986	1.19752	1.02257
FAM126A	1.10621	0.968974	1.25418	1.31384
FAM127A	0.797422	1.00921	1.07274	1.14733
FAM129A	1.17808	1.00761	1.50381	1.34703
FAM160B1	1.01217	1.10142	1.23327	1.36613
FAM195A	0.832815	0.848367	1.07232	0.898134
FAM199X	1.10391	1.35088	1.95547	1.75169
FAM213A	1.06417	0.893048	1.2139	1.12193
FAM83D	1.16264	1.07363	1.22637	1.42637
FAM98C	1.05437	0.998934	1.23348	1.14286
FBXO2	1.08824	0.695294	1.52	1.31765
FCHSD1	1.12081	1.07297	1.30622	1.28708
FEM1B	0.898197	0.987275	1.09226	1.17285
FERMT2	1.01017	0.838418	1.14463	1.01356
FHL1	1.1677	1.17547	1.41304	2.04969
FHL3	0.989033	0.881356	1.17049	1.00499
FKBP9	1.07783	0.91791	1.22388	1.17591
FLNA	1.05751	0.913146	1.26995	1.027
FLNC	1.04405	0.889868	1.60793	1.49633
FLYWCH2	0.985626	0.870637	1.08932	1.06879
FNBP1	1.01025	0.888383	1.11845	1.1287
FNTB	1.08503	0.884354	1.15986	1.10658
FRAS1	1.0772	0.93943	1.26247	1.28029
FRYL	1.01448	1.00931	1.15098	1.25026
FTL	0.961358	1.08548	1.19438	1.34426
FZD6	0.942825	1.12444	1.13565	1.35538
G6PD	0.973108	1.0249	1.16833	1.26793
GABARAPL1	1.30898	1.50731	1.92484	2.21712
GALK1	1.01591	0.918346	1.15589	1.21951
GALT	1.13308	1.12935	1.26493	1.37562
GANAB	0.844569	0.895131	1.19195	1.01873
GAS2L3	1.03518	1.07037	1.27605	1.24628
GCA	1.00305	0.900305	1.15768	1.12309
GDA	1.02234	0.95736	1.4132	1.47208
GGA2	0.994737	0.944211	1.21684	1.10421
GGA3	0.820018	0.90957	1.12643	0.977173
GINS1	0.933809	1.03768	1.20367	1.29633
GINS2	1.05455	0.924242	1.27273	1.21919
GINS3	0.994071	0.931818	1.17885	1.18478
GINS4	1.12639	0.905966	1.33569	1.19414
GIT2	1.01071	0.795503	1.11563	0.962527
GJC1	0.935841	0.839602	1.15044	1.08186
GLI2	1	1.18777	1.48791	1.62447
GLS	0.887192	0.904818	1.20917	1.08696
GM2A	1.14225	0.973262	1.35187	1.30481
GMFB	1.08712	1.04356	1.16682	1.31418
GMIP	1.02597	0.998918	1.24459	1.20455
GNE	0.960946	0.897225	1.19013	1.24563
GOLGB1	1.06818	0.892562	1.17665	1.10537
GOSR2	0.927308	0.949902	1.10118	1.14931
GOT1	0.971396	0.922197	1.1167	1.11327
GPAT2	1.05775	0.851781	1.17902	1.08373
GPI	1.46328	0.886609	1.42657	1.28942
GPRC5A	1.01473	0.875502	1.2075	1.14458
GPS1	1.21159	1.22911	1.66712	1.25202
GPX8	1.07204	0.990323	1.40968	1.06989
GSTT2	0.996583	1.00911	1.21526	1.25057
GTF2H5	1.07925	0.955711	1.23193	1.16317
GTSE1	0.97584	1.08298	1.35189	1.45693
H6PD	1.11277	0.945745	1.48404	1.00426
HABP4	0.970621	1.0226	1.11638	1.2678
HDHD2	0.966901	0.96991	1.24173	1.21665
HERC5	0.980315	0.999016	1.12106	1.16831
HEXIM1	1.00722	0.928866	1.13814	1.13608
HIF1AN	1.02132	1.00556	1.16404	1.27804
HIST2H2AB	1.13126	1.2158	1.1624	2.13571
HJURP	1.05603	0.986602	1.24239	1.28502
HMHA1	1.07733	0.782839	1.12924	1.08898
HMMR	1.00916	1.00509	1.2177	1.28281
HN1	1.14056	0.846567	1.28755	1.0118
HNF4A	1.06235	0.92176	1.50244	1.33496
HNRNPR	0.517219	0.645224	0.936972	0.766082
HOMER3	0.951923	0.873077	1.10865	1.06154
HOOK3	1.03098	0.885998	1.16853	1.08055
HOXB7	0.916031	0.912977	1.23664	1.2626
HOXB9	0.737483	0.813261	0.994587	0.975643
HPRT1	0.981445	0.943359	1.14453	1.15234
HPS5	0.966316	0.956842	1.20737	1.06211
HS6ST2	0.595902	0.717213	0.903279	0.783607
HSBP1	1.29162	0.823966	1.40297	1.23012
HSD17B11	0.949829	0.994299	1.13683	1.15735
HSPB11	1.11808	0.990596	1.4023	1.40543
HSPB8	1.01713	0.90364	1.24197	1.25268
HSPE1	0.973094	1.15919	1.09081	1.37668
HSPG2	0.745781	0.89135	1.20992	1.03797
HTRA2	1.05702	0.937698	1.22914	1.10665
HUWE1	0.986721	0.994893	1.11951	1.16343
HYI	1.18127	0.907543	1.42579	1.00608
IFI35	0.879775	0.935955	1.1573	1.15056
IFIT1	0.888542	0.897917	1.50417	1.74062
IGF2BP3	0.979014	1.00735	1.11018	1.17524
IGFBP6	1.08996	2.32218	1.47699	2.51883
IKBIP	1	0.91853	1.5639	1.48243
IKBKG	1.04141	0.832298	1.19876	1.07971
INCENP	0.976169	1.04125	1.15399	1.31622
INPP1	0.95544	0.990674	1.13472	1.20933
INPP5K	1.03831	0.97379	1.1371	1.23589
IPP	0.972851	0.98371	1.10317	1.25068
IQGAP2	1.05528	1.0688	1.40418	1.61057
IQGAP3	0.973369	0.945406	1.33955	1.24767
IRAK1	0.97235	1.12558	1.28917	1.14286
IRS2	0.990155	0.973277	1.25035	1.07736
ISCA2	1.04481	0.908197	1.19454	1.29617
ITGB4	1.03026	0.90784	1.22283	1.06878
ITGB5	1.00763	0.882443	1.27786	1.15878
ITM2C	0.948298	0.929382	1.23077	1.23834
ITPKA	0.966368	0.894619	1.1065	1.05605
ITPRIP	0.890816	1.10408	1.08061	1.26327
ITSN1	1.00954	0.985154	1.15801	1.18134
KANK2	0.988864	0.926503	1.16258	1.25501
KBTBD6	0.959606	0.969458	1.11724	1.11724
KCTD14	0.698988	0.833895	0.813659	0.94941
KCTD9	0.955682	0.948864	1.11136	1.19773
KDELC1	1.01464	0.954955	1.16441	1.12613
KDELC2	0.931336	0.802747	1.2834	1.23221
KHK	1.11813	1.07461	1.35233	1.21762
KIAA0101	0.911007	1.16276	1.24122	1.67564
KIAA0922	0.914401	0.968781	1.00504	1.16415
KIAA1109	0.871444	0.943098	0.950474	1.13804
KIAA1462	1.07854	1.02544	1.49336	1.38274
KIAA1598	1.02334	0.944911	1.12418	1.14099
KIAA1609	0.920782	1.05864	1.20576	1.19033
KIF11	1.05828	0.970348	1.17178	1.17485
KIF18A	1.02505	1.03206	1.14028	1.24349
KIF20A	1.02476	0.913886	1.21636	1.23681
KIF23	0.974566	1.04277	1.11561	1.23006
KIF2C	0.994112	1.03435	1.1423	1.21001
KIF4A	0.985991	0.977371	1.17565	1.19397
KIFC1	0.962963	1.06707	1.1021	1.28629
KITLG	1.04878	0.919325	1.07974	1.20544
KLF13	0.984865	0.979459	1.35568	0.956757
KLF4	0.754875	0.994429	1.83844	0.810585
KLHDC5	0.934149	0.763876	1.08749	0.88523
KPNA2	0.974215	0.982063	1.13229	1.13229
KRT16	1.07819	1.03414	1.01101	2.05176
L1CAM	1.04589	0.89557	1.56804	1.26899
LAMB1	1.0711	0.848485	1.338	1.31818
LAMTOR5	1.22781	0.780749	1.36257	1.0738
LAPTM4A	1.07194	0.634121	1.41007	0.756423
LASP1	1.03796	1.04058	1.28272	1.3377
LGALS1	1.36429	0.907143	1.71571	1.52429
LGALS8	0.965831	0.973804	1.18451	1.1344
LIMD2	1.04167	1.22727	1.50758	1.91288
LIN37	0.965255	0.964169	1.09012	1.13464
LIN54	1.00239	1.03465	1.17204	1.27599
LMAN2L	1.05655	0.969655	1.23034	1.21931
LMO7	1.02	0.83	1.49	1.34
LOC550643	0.546988	1.24699	1.04578	1.24096
LPGAT1	0.965217	0.976087	1.06413	1.21304
LPIN2	1.12828	0.932945	1.24393	1.15452
LRR1	1.06208	0.977827	1.33814	1.03548
LRRC42	1.02022	0.969666	1.25581	1.15268
LRRC8E	1.02694	0.963362	1.25754	1.03664
LRRFIP1	1.05556	0.78744	1.21014	1.04952
LYPLAL1	1.0407	1.00581	1.13663	1.2374
LZIC	1.09931	0.743363	1.20747	1.00885
LZTS2	0.944498	0.844976	1.09282	1.00574
MAGEB1	1.01001	0.947067	1.5279	1.59657
MAGED2	0.967634	1.05134	1.1317	1.23661
MAN1A1	0.975391	1.20694	1.17562	1.41946
MAN2B2	0.829579	0.889324	1.04505	0.947111
MAP1B	1.03805	0.738204	1.35769	1.11416
MARCKSL1	0.920578	1.03971	1.0704	1.18412
MAVS	0.99435	0.989642	1.14313	1.16667
MBNL2	1.1908	1.41056	1.32538	1.68654
MBOAT2	0.883144	0.936918	1.04137	1.24405
MBTPS2	0.865801	0.858225	1.15909	0.845238
MEA1	1.21535	0.771855	1.34648	1.02345
MED9	0.999086	0.841865	1.17459	1.08684
MEST	1.20978	0.780444	1.15111	1.14311
MEX3C	1.04891	0.841304	1.18804	1.19457
MFGE8	0.393096	0.531685	0.808346	0.551262
MFSD8	1.10993	1.10757	1.3026	1.25414
MICA	0.446092	0.543801	0.904313	0.541105
MICAL1	1.0241	0.944578	1.40482	1.42892
MICALL1	1.03965	0.980176	1.10022	1.26211
MICALL2	0.857602	1.02891	1.06531	1.16702
MKI67	0.992144	1.09652	1.17733	1.39282
MKL2	0.928138	1.00101	1.19737	1.14879
MLLT6	0.749271	1.24004	1.22352	1.25364
MLPH	0.825137	0.677596	1.06667	0.809836
MMP14	0.923523	0.987254	1.10545	1.11587
MMP24-AS1	1.35861	1.5861	1.8673	1.56872
MORC4	1.31259	1.13333	1.5437	1.36889
MPP1	0.991812	1.05834	1.12692	1.31934
MPP2	0.963243	0.965405	1.10054	1.18054
MPRIP	1.00655	0.896288	1.12664	1.06769
MPZL1	0.987421	0.951782	1.12474	1.13522
MRC2	0.975689	0.734198	1.53647	1.34846
MSANTD2	0.741028	0.677013	0.959263	0.673133
MSH2	0.978615	0.977597	1.20978	1.25967
MSH6	1.02516	1.02079	1.28556	1.34573
MSX1	1.05277	0.905013	1.35092	1.26121
MUL1	0.647303	1.08506	0.923237	1.10477
MYADM	0.898324	0.637989	1.08156	0.859218
MYBL2	0.606029	0.996881	0.887734	1.12058
MYH10	1.03199	0.944272	1.18473	1.17647
MYL12A	1.02558	0.956618	1.19911	1.15239
MYL6	1.23492	0.787302	1.5291	0.941799
MYL9	1.1615	0.916021	1.73256	1.53618
MYO1C	0.949275	0.960145	1.27415	1.11473
MYO5C	0.91399	0.924352	1.10466	1.10881
MYOF	0.983645	0.985981	1.1729	1.2021
NAAA	0.949339	1.21145	1.1696	1.45044
NAGK	0.99177	0.963992	1.18416	1.15741
NANS	1.15347	0.944307	1.29827	1.23267
NAP1L1	1.18071	0.970558	1.43655	1.48122
NARG2	1.11312	1.09842	1.46267	1.17534
NCAM2	0.907071	0.629293	1.07374	0.79899
NCAPD2	1.01524	0.996483	1.23564	1.37984
NCAPG	0.974041	0.962754	1.18397	1.1693
NCAPH	1.02257	0.876975	1.24605	1.18284
NCAPH2	1.02748	1.00597	1.23059	1.23775
NCOR1	0.959116	0.864088	1.19116	1.0895
NDFIP1	0.831849	1.04343	1.26058	1.30067
NDFIP2	0.896833	0.861538	1.2733	0.99638
NDRG2	0.743333	0.756667	0.971667	1.095
NDRG3	1.0408	0.903226	1.17932	1.1129
NDUFA3	0.938918	0.834206	1.17976	0.90925
NDUFA6	0.996829	0.92389	1.13108	1.09408
NDUFB8	1.04146	1.22439	1.30122	1.36341
NDUFS4	0.940199	1.09856	1.11296	1.28793
NEBL	0.931529	0.851911	1.52548	1.68312
NEK6	1.00119	0.830751	1.09774	1.03576
NEK9	0.97042	0.953244	1.10496	1.13263
NES	1.00603	0.856454	1.47889	1.4041
NF2	1.03548	1.02234	1.29435	1.2615
NFAT5	0.962195	0.713415	1.01341	0.945122
NFATC2	0.944764	0.837745	1.0725	1.10242
NFKBIE	0.893939	0.977273	0.978355	1.25108
NFU1	1.2029	0.846377	1.29179	1.1256
NGFR	1.06265	0.893976	1.17108	1.33012
NHS	1.01711	0.82139	1.39358	1.1508
NIPSNAP3A	1.16783	1.0979	1.2704	1.47436
NPEPL1	0.914962	0.975242	1.15501	1.29279
NQO1	0.994839	0.996129	1.25548	1.2129
NR2F1	1.01921	1.21255	1.15877	1.72087
NSFL1C	1.1397	0.868258	1.29973	1.16092
NT5C2	1.03176	0.993428	1.23877	1.20153
NT5DC3	1.02205	0.957001	1.1731	1.11907
NTAN1	0.913228	0.916402	1.06455	1.13651
NUB1	1.01938	0.978335	1.18244	1.22577
NUCB2	1.17946	0.697297	1.33405	0.963243
NUF2	0.971687	0.976217	1.13703	1.13703
NUMB	1.01264	1.01724	1.16552	1.17471
NUMBL	0.940141	0.807512	1.10798	1.02582
OAS3	1.01616	1.05354	1.23333	1.34949
ODC1	1.17354	0.886598	1.11856	1.48454
OGDHL	0.744928	0.769565	1.07754	0.881159
OPTN	1.19406	0.916667	1.51941	1.42237
OSBPL3	0.959911	0.971047	1.098	1.1637
OSMR	1.09182	1.16194	1.57095	1.38397
OVCA2	0.884774	0.841564	1.4928	0.981481
PACSIN2	1.07006	0.967232	1.23842	1.20452
PAIP2B	1.14397	0.786965	1.21984	1.08949
PALM	0.889617	0.795628	1.42951	1.2776
PALM3	1.09763	0.778364	1.47757	1.40633
PAPSS2	1.05718	0.865691	1.18218	1.05319
PARP12	1.07378	0.948922	1.27809	1.20204
PARP14	0.956434	0.927052	1.10334	1.18541
PARP16	0.678046	0.870147	0.831325	1.01539
PARP9	0.928355	0.938446	1.15943	1.17356
PARVA	0.978372	0.935115	1.23919	1.16921
PC	0.971574	0.942132	1.14315	1.16142
PCBD2	1.11871	1.0012	1.20264	1.30576
PCBP4	0.935445	0.950061	1.09501	1.09379
PCMTD1	1.01332	1.33185	1.24084	1.54828
PDE5A	1.66816	1.84978	2.59417	2.36099
PDLIM1	1.08178	0.968458	1.23364	1.1285
PDLIM2	1.04856	0.843832	1.30709	1.37139
PDLIM3	0.963953	0.869767	1.16047	1.10814
PDLIM5	1.04211	1.02632	2.44211	2.57544
PDS5A	1.42453	2.36321	3.78774	2.85849
PEA15	1.14703	0.704865	1.31459	1.04324
PEAK1	0.956835	0.690647	1.05242	1.04728
PEPD	1.04196	0.993007	1.13487	1.20579
PFAS	0.994059	0.933663	1.1396	1.15347
PFN2	1.00321	1.01283	1.16898	1.23102
PGM2L1	0.956473	0.91183	1.14732	1.20089
PHF1	1.01364	0.901136	1.15909	1.1375
PHLDB1	1.00813	0.961382	1.14431	1.22866
PHLDB2	0.974914	0.930445	1.15964	1.10148
PIK3AP1	1.10526	0.870614	1.34539	1.26645
PIP4K2A	0.951274	0.933555	1.07198	1.1052
PKM	0.938883	0.893572	1.11697	1.05585
PLA2G15	0.943966	0.940733	1.09698	1.13039
PLCD3	0.915408	0.939577	1.06747	1.12387
PLD1	1.0291	0.785797	1.16997	1.04889
PLEC	0.895161	0.5681	1.20789	0.750896
PLEKHA2	0.845985	0.908691	0.944994	1.18702
PLEKHO2	1.04567	1.00937	1.29508	1.25176
PLIN2	0.864964	1.30018	1.28285	1.26825
PML	0.961211	0.997162	1.11164	1.19489
PMM1	1.1576	0.993341	1.33518	1.22752
POC1A	1.07805	1.13659	1.28902	1.28415
POLE4	0.771679	0.814638	1.02546	0.887033
POLI	0.990077	0.945976	1.23925	1.01433
POLR1A	0.93658	1.03851	1.38505	1.05323
POLR2I	1.21013	0.81681	1.43642	0.961207
POMP	1.10899	0.847036	1.19981	1.10707
PPFIBP1	1.03084	0.863582	1.293	1.1981
PPIC	0.951475	1.00285	1.13987	1.12655
PPME1	0.987654	0.962963	1.2716	1.28395
PPP1R11	1.12823	1.12069	1.27047	1.36099
PPP1R14B	0.918455	0.817167	1.0103	0.990558
PPP1R18	0.97046	0.922319	1.19803	1.11379
PPP1R2	1.18591	0.829099	1.33603	1.1224
PPP2R1B	1.00447	1.06152	1.1745	1.34564
PRAF2	0.852071	0.99645	1.18935	1.29941
PRC1	1.02669	1.02875	1.19302	1.26694
PRDX6	0.982922	0.983871	1.11101	1.16319
PRF1	0.858385	0.749068	1.22112	1.25342
PRKAG2	1.0395	0.899549	1.29797	1.17269
PRKCA	1.01956	0.912647	1.26728	1.22816
PRKCDBP	0.984326	0.92581	1.24138	1.11076
PRMT10	0.804188	0.831414	1	0.892147
PRMT2	0.824923	0.838311	1.01442	1.19876
PRNP	0.998582	1.04823	1.2383	1.3305
PRPS1	0.985752	0.983972	1.06589	1.25022
PRR11	0.82996	0.97166	1.13664	1.20142
PSMB10	0.850412	1.20141	1.56302	1.702
PSME1	1.02074	0.918002	1.29595	1.23091
PSRC1	1.15574	1.20355	1.43443	1.42486
PTGFRN	1.00549	0.972558	1.11526	1.20527
PTGR1	1.04343	0.890845	1.21479	1.1608
PTMS	1.2072	0.689689	1.29377	1.23833
PTPN1	1.02217	1.04434	1.1797	1.27655
PTRH1	0.840805	0.901189	1.04483	1.06404
PXMP2	0.851715	1	1.06395	1.28545
PXMP4	1.07591	1.0308	1.46865	1.43124
RAB11A	0.576885	1.15083	1.03722	1.19589
RAB20	1.00147	1.26549	1.29499	1.32743
RAB3B	1.07166	1.15309	1.80782	1.68893
RAB43	0.963868	1.00956	1.11902	1.32837
RABGAP1L	0.983083	0.899436	1.10338	1.08083
RAP2A	1.07674	1.8093	2.95349	2.14186
RBBP4	1.06115	0.928058	1.11331	1.17626
RBM23	0.70802	1.03885	1.11779	1.26817
RBM38	0.969957	1.06009	1.18455	1.46352
RBMS2	0.939709	1.08316	1.59667	1.70686
RBP7	1.00782	1.07709	1.14525	1.26704
RBPMS	0.976309	0.990025	1.4601	1.51372
RFXAP	1.00542	1.13218	1.1896	1.33261
RHBDD1	0.773526	0.926577	1.21717	1.04343
RHOQ	0.754582	0.844196	0.866599	1.11405
RNF130	1.03409	0.879132	1.3626	1.15702
RNF7	1.17706	0.845212	1.2216	1.15256
ROCK2	0.998845	1.04388	1.21132	1.306
RP2	0.971326	0.927121	1.24253	1.07527
RPE	1.02751	0.991461	1.17457	1.21632
RPS6KA5	0.949328	0.961737	1.091	1.19648
RRAS	0.983721	0.951163	1.11047	1.18372
RRBP1	1.19054	0.712162	1.52297	1.11757
RSU1	0.959607	0.980349	1.10699	1.13428
RUFY3	0.98995	0.970854	1.02312	1.26935
RUNX1	0.987288	0.875706	1.36582	1.34746
S100A10	1.01639	1.31311	1.3082	1.65082
S100A11	0.996255	0.982522	1.20849	1.24719
S100A4	1.22446	0.856242	1.82598	1.82093
SAMD4A	0.778959	0.674814	0.946865	0.872476
SAMHD1	0.920164	0.911975	1.07574	1.09417
SAV1	0.951613	0.835253	1.18548	1.18433
SCAMP2	0.834248	0.592755	1.03183	0.657519
SCARA3	0.936799	0.814475	1.11315	0.954128
SCD5	0.977069	1.01296	1.10269	1.24925
SCRN1	1.13886	0.851064	1.21837	1.09183
SDC1	1.39405	1.56918	2.03327	1.70578
SDCBP	1.43444	0.947778	1.54444	1.31778
SEC14L1	0.928401	0.843675	1.05131	1.00119
SEC14L2	1.22632	0.956579	1.36184	1.23684
SEMA3B	0.921392	1.08505	1.14433	1.17397
SEMA7A	1.0745	0.944126	1.351	1.19054
SENP8	0.938614	1.12178	1.20396	1.25941
SERINC1	1.04297	0.985677	1.21094	1.3151
SERPINA1	1.03714	0.94837	1.20924	1.2183
SERPINA3-1	0.934109	1.11143	1.12403	1.24516
SERPINA5	1.00824	0.969376	1.23086	1.27444
SERPINB1	0.975223	0.945491	1.24777	1.19326
SERPINB6	1.05627	0.991115	1.21422	1.22409
SERPINE1	1.02475	1.77228	1.96535	2.13119
SERPINH1	0.994638	0.906166	1.21716	1.11796
SESN2	1.07314	0.987429	1.35314	1.25143
SGOL2	0.924607	0.863874	1.06597	1.12147
SGPL1	0.984016	0.944056	1.14286	1.08591
SGTB	1.07778	0.870707	1.26768	1.11212
SH3BGRL3	1.29358	0.923984	1.519	1.05374
SH3BP4	1.02291	0.781671	1.31671	1.09704
SHC1	1.02797	0.940559	1.21445	1.162
SHCBP1	1.05344	1.00103	1.26824	1.27441
SIK2	0.959445	0.71825	1.29029	1.26894
SIMC1	0.86037	0.848049	1.27105	0.970226
SIPA1	1.00733	0.862827	1.04607	1.14031
SIRPA	0.983407	0.862832	1.10841	1.02655
SIVA1	1.02536	1.04831	1.22585	1.18478
SKA3	1.17271	0.969083	1.28145	1.21748
SLC16A7	0.85015	0.947053	0.978022	1.1009
SLC19A2	0.58498	1.19071	1.25099	1.1334
SLC1A5	1.23641	1.11277	1.4212	1.4375
SLC20A1	1.11954	0.880463	1.22622	1.18895
SLC25A20	0.986748	1.00102	1.21509	1.27523
SLC25A29	1.01967	1.01967	1.13115	1.22404
SLC2A1	1.0089	0.848754	1.52313	1.25089
SLC2A3	1.18792	1.01342	5.05369	5.12416
SLC39A1	0.988764	0.954192	1.17718	1.0847
SLC39A14	0.964037	0.786543	1.28654	1.12877
SLC6A6	0.754074	0.774815	0.954074	0.965926
SLC7A11	0.787156	1.05321	1.17615	1.35229
SMARCC2	0.982365	1.04461	1.12033	1.29772
SMC4	0.974638	0.93599	1.21498	1.12077
SMCHD1	0.991011	0.989888	1.14831	1.15955
SMPD2	0.99375	1.10833	1.23021	1.26354
SNAP23	0.919727	1.01708	1.06234	1.193
SNX16	1.0079	0.764067	1.10267	1.03258
SNX17	0.912633	0.995277	1.09327	1.17828
SNX21	0.298673	0.31969	0.346239	0.466261
SNX3	0.974857	0.984	1.10743	1.16229
SOD1	1.08916	0.738602	1.2229	0.995947
SOGA1	1.11123	1.03448	1.19577	1.29922
SORT1	0.882273	0.952639	1.44926	1.42625
SOX13	0.974937	1.21554	1.28697	1.25689
SOX9	1.05498	0.836197	1.19702	0.979381
SPAG1	1.0288	1.00785	1.34293	1.29319
SPDL1	1.03996	0.835853	1.18143	1.00648
SPECC1L	0.989831	0.938983	1.15028	1.11073
SPTAN1	1.07742	0.756129	1.24387	0.950968
SPTBN1	1.03239	0.821127	1.22394	1.00141
SQSTM1	1.06127	1.01348	1.20833	1.21691
SRGAP1	1.02161	1.0036	1.28932	1.33493
SSBP3	0.910355	0.709428	1.18624	0.837713
STIM1	1.05612	1.03827	1.26148	1.25383
STK17A	1.02692	0.889744	1.18462	1.33205
STK38	0.973841	0.984542	1.14982	1.14625
STK4	0.936585	0.903415	1.05171	1.16488
STMN1	1.12097	0.836022	1.44982	1.33065
STX16-NPEPL1	0.971079	0.968854	1.0723	1.25695
STXBP1	0.9859	0.970716	1.17679	1.2115
SUFU	1.14533	1.048	1.364	1.30667
SULT1A1	0.959913	0.956663	1.13109	1.11593
SUSD2	1.02554	0.787819	2.24754	2.05894
SUV39H2	1.36642	1.41168	1.88759	1.51095
SYNE3	1.00559	0.928671	1.37483	1.31329
SYNE4	0.886364	1.16883	2.20779	1.15476
TACC1	1.05047	0.93796	1.20189	1.15457
TANGO6	0.939505	0.827681	1.011	1.03208
TBC1D13	0.979145	0.839416	1.22419	1.22523
TBC1D2	0.998893	0.990033	1.23145	1.25471
TBCK	1.03879	0.784483	1.11422	0.984914
TCEB1	1.19507	0.76386	1.25565	1.02875
TCOF1	0.958333	0.901163	0.929264	1.2781
TDRD7	0.900935	0.916822	1.03551	1.05794
TESC	1.40674	0.912154	1.55716	1.29242
TGFB1I1	1.00416	0.848821	1.23162	1.29958
TGM2	1.00802	0.593583	2.57754	1.89037
TGOLN2	0.920411	1.10398	1.33761	1.34531
TIAM1	0.914286	0.863736	1.09341	1.04725
TK1	0.978558	1.03899	1.32066	1.40448
TM4SF18	0.857658	0.944144	1.28649	1.17117
TMEM106C	1.183	0.98229	1.34357	1.27509
TMEM173	1.06088	0.804391	1.20659	1.12176
TMEM2	0.979275	0.80829	1.28756	1.13731
TMEM51	1.35625	1.35156	1.54688	1.88437
TMEM67	0.949782	1.08843	1.17576	1.23035
TNIK	0.946492	1.1308	1.62426	1.6302
TNS3	1.06428	1.00494	1.28677	1.38566
TOM1L2	0.943719	0.99196	1.63116	1.58593
TPM3	1.08126	0.763814	1.09426	1.29036
TPX2	0.984898	1.05933	1.15858	1.31715
TRAM2	0.954175	0.866599	1.14257	1.08758
TRDMT1	0.507056	0.97379	1.0252	1.04335
TRIM2	1.05065	1.01531	1.17668	1.2391
TRIM21	1.03027	1.01855	1.16895	1.22363
TRIM41	0.890821	0.919807	1.0715	1.07536
TRIM44	1.04853	0.790698	1.2912	1.21132
TRIM47	0.997685	0.915509	1.19444	1.1794
TRIM68	0.90519	1.20659	1.29242	1.22056
TRMT11	0.910872	0.86288	1.00881	1.03232
TSTD2	0.984026	1.877	1.99521	1.73003
TTC9C	0.975401	0.913369	1.12834	1.11979
TUBA1C	0.992016	0.929142	1.09182	1.17365
TUBB2A	1.00256	0.969309	1.25448	1.36957
TUBB2B	0.981006	0.922905	1.25251	1.15978
TUBB6	1.02569	0.9417	1.14625	1.12945
TULP3	0.840932	0.905775	1.04357	0.969605
TWSG1	1.35512	1.12418	1.51961	1.65359
TXN2	1.04264	0.847868	1.18023	1.10465
TXNDC17	1.17234	0.984632	1.30077	1.30735
TXNL4B	1.07621	1.03811	1.3164	1.18129
TYMP	0.979042	0.892216	1.11477	1.0998
UAP1	1.02179	0.938462	1.33077	1.3
UAP1L1	0.956697	0.881168	1.2719	1.1148
UBASH3B	1.05657	0.929664	1.43578	1.37309
UBE2C	1.07606	0.829978	1.16443	1.066
UBE2H	1.1561	0.798122	1.50117	1.21596
UBE2J1	0.955789	0.968421	1.07368	1.15053
UBE2L6	0.968451	0.997132	1.14723	1.45698
UBFD1	0.950932	0.893032	1.05496	1.0736
UBR7	1.05359	0.926316	1.17321	1.17225
UBXN2B	0.907707	0.961941	0.987631	1.30162
UGDH	0.974798	0.920363	1.16028	1.125
UNC13D	1.37129	1.0066	1.70792	1.07921
USP40	0.848087	1.15956	0.806557	1.5082
USP47	1.01591	0.854719	1.16119	1.09544
VANGL1	0.992949	0.994125	1.18331	1.17156
VASP	0.953777	0.958286	1.18377	1.32807
VHL	0.935266	0.972947	1.10435	1.1942
VPS45	0.958932	0.950719	1.12936	1.11191
WASH6P	0.858833	0.792054	1.07439	0.922232
WDR1	1.04767	1.01192	1.18093	1.21343
WDR53	0.886512	0.869767	1.05116	1.03535
WDR62	0.889381	0.855088	1.17146	1.15044
WIPI1	0.927918	0.776888	1.19336	1.26201
WNK1	1.04941	0.976369	1.20086	1.19012
WWOX	1.13069	0.993224	1.43272	1.22749
XRCC4	0.948259	0.948259	1.14428	1.17612
YLPM1	0.963974	1.00655	1.22052	1.19432
ZDHHC18	0.715609	0.737705	0.932288	0.776194
ZFYVE21	0.937063	0.925075	1.22478	1.11988
ZNF185	1.08129	0.864516	1.34839	1.25032
ZNF318	0.853748	0.804388	1.03108	0.921389
ZNF385A	0.98359	0.969231	1.13641	1.11077
ZNF800	0.957237	1.01645	1.0943	1.17654
ZSCAN21	0.548187	0.637489	0.938992	0.577365
ZSWIM7	0.828426	0.876142	0.971574	1.18579
ZWINT	1.02289	0.83975	1.23621	1.0999
ZYX	1.01708	0.922551	1.21185	1.11731
