# Supplementary material for: PUMILIO Proteins in Colorectal Cancer: Tumor Growth Promoting Function and Potential as Therapeutic Targets
Source: Research Square preprint supplement (doi:10.21203/rs.3.rs-199046/v1), 2021-02-11
Supplement: Supplementary file 3 [file 3a1b00fe8ba08bed643ac9af.docx]

**Supplementary Figures**


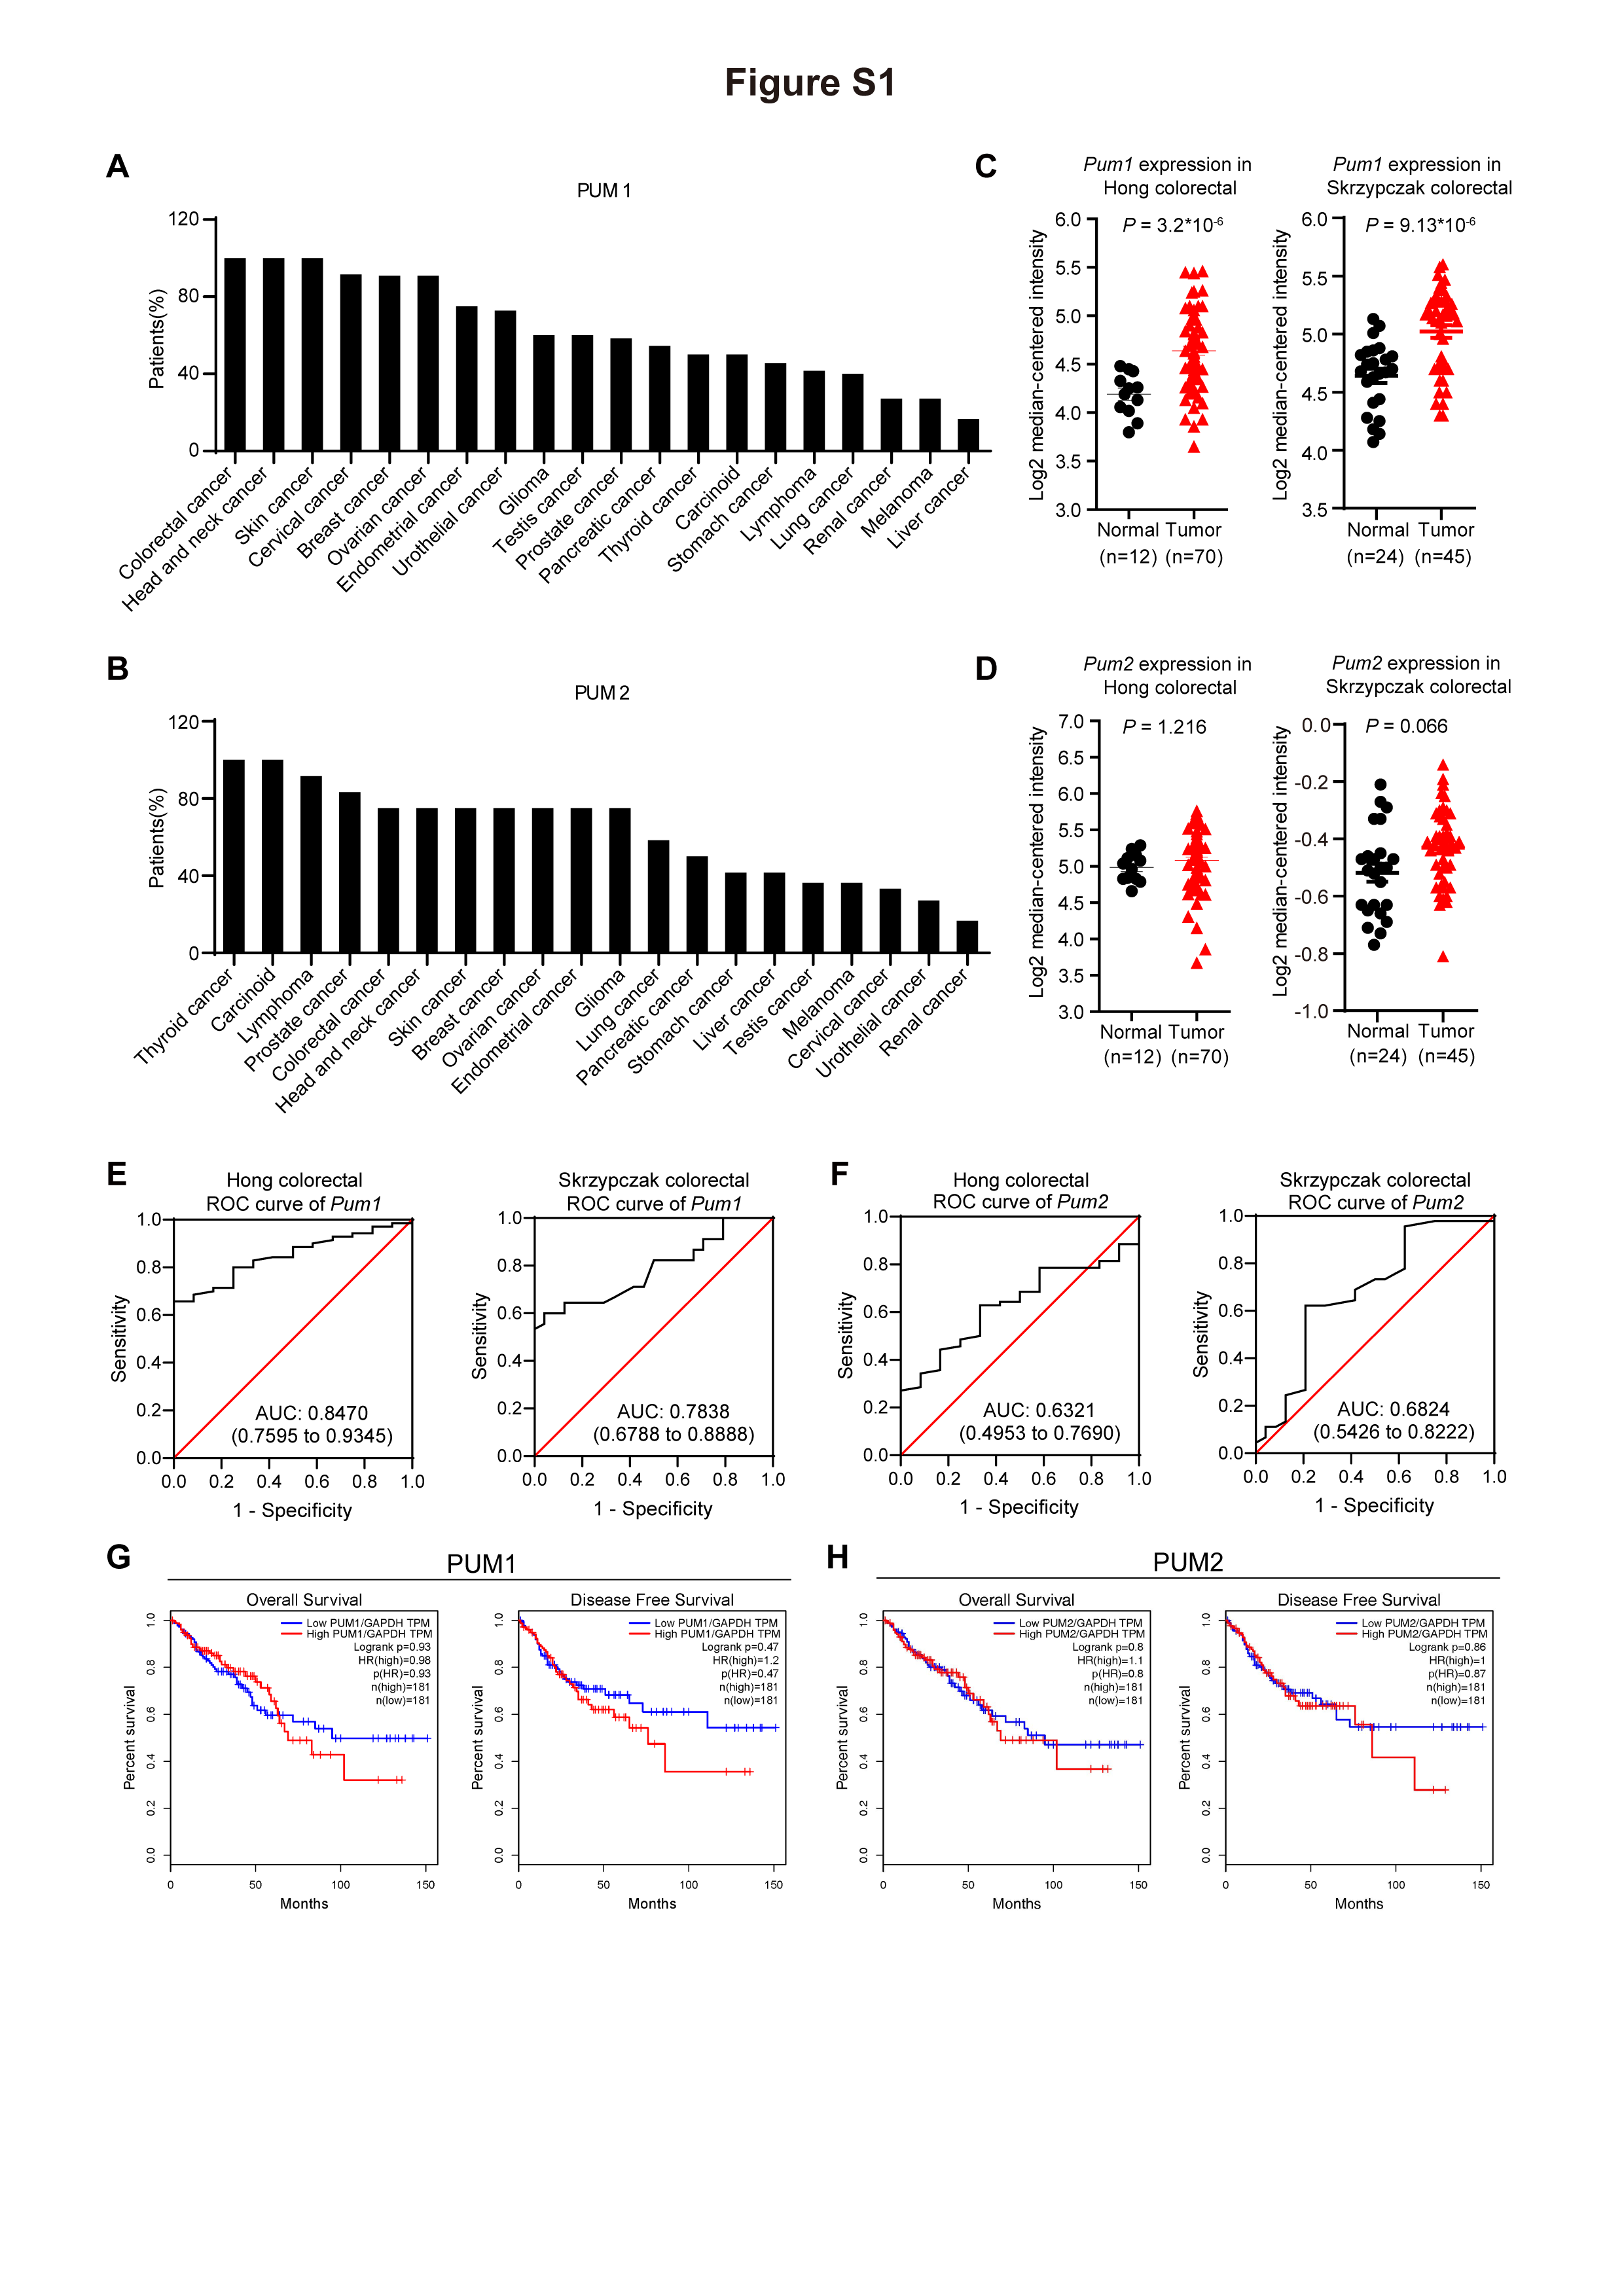


**Figure S1. PUM1 is markedly overexpressed in colorectal cancer**

(A and B) Protein levels of PUM1 (A) or PUM2 (B) in different types of cancer using public database (The human protein atlas).

(C and D) Expression of *Pum1* (C) or *Pum2* (D) in human colorectal cancer clinical specimens using the TCGA mRNA HiSeq expression array data.

(E and F) ROC curve analysis for colorectal cancer diagnosis. AUC estimation for Pum1 (E) or Pum2 (F) in human colorectal cancer clinical specimens.

(G and H) Clinical overall survival and disease free survival of colorectal cancer patients with different levels of PUM1 (G) and PUM2 (H).


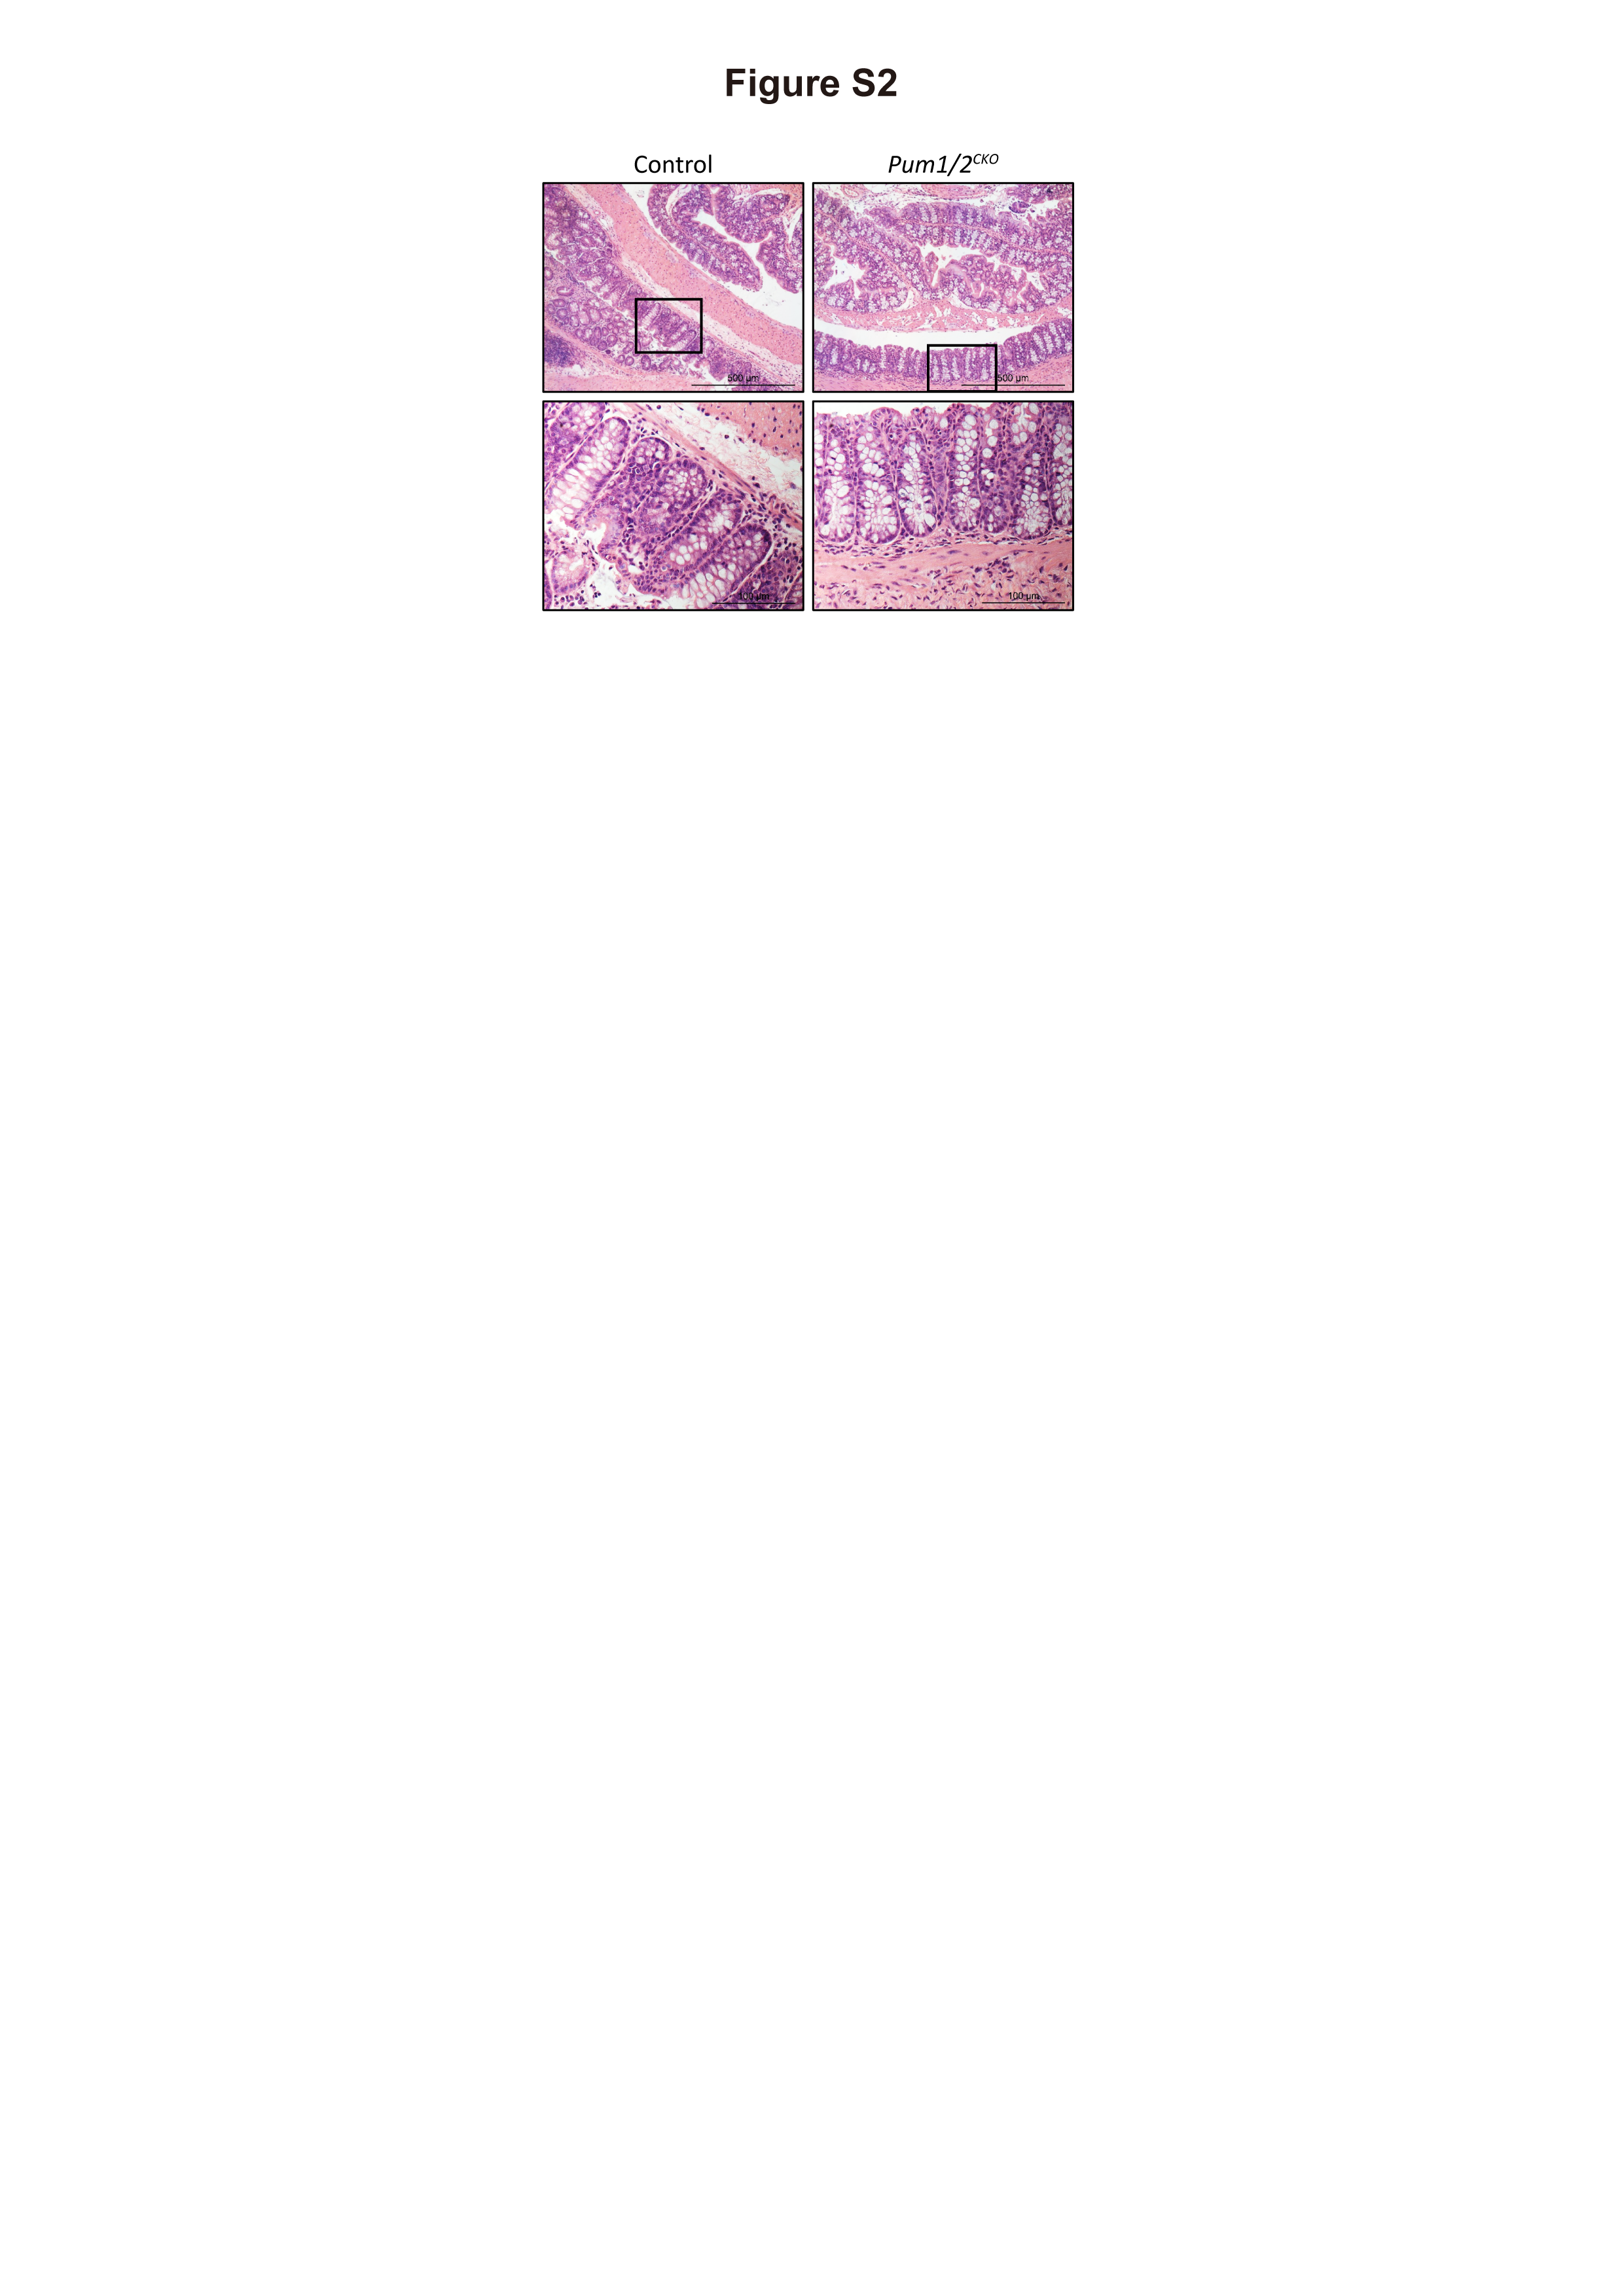


**Figure S2. The morphology of the small intestine of *Pum1/2CKO* mice did not change compared with the control mice**

H&E staining of colon tumor in control and *Pum1/2CKO* mice in AOM / DSS model.


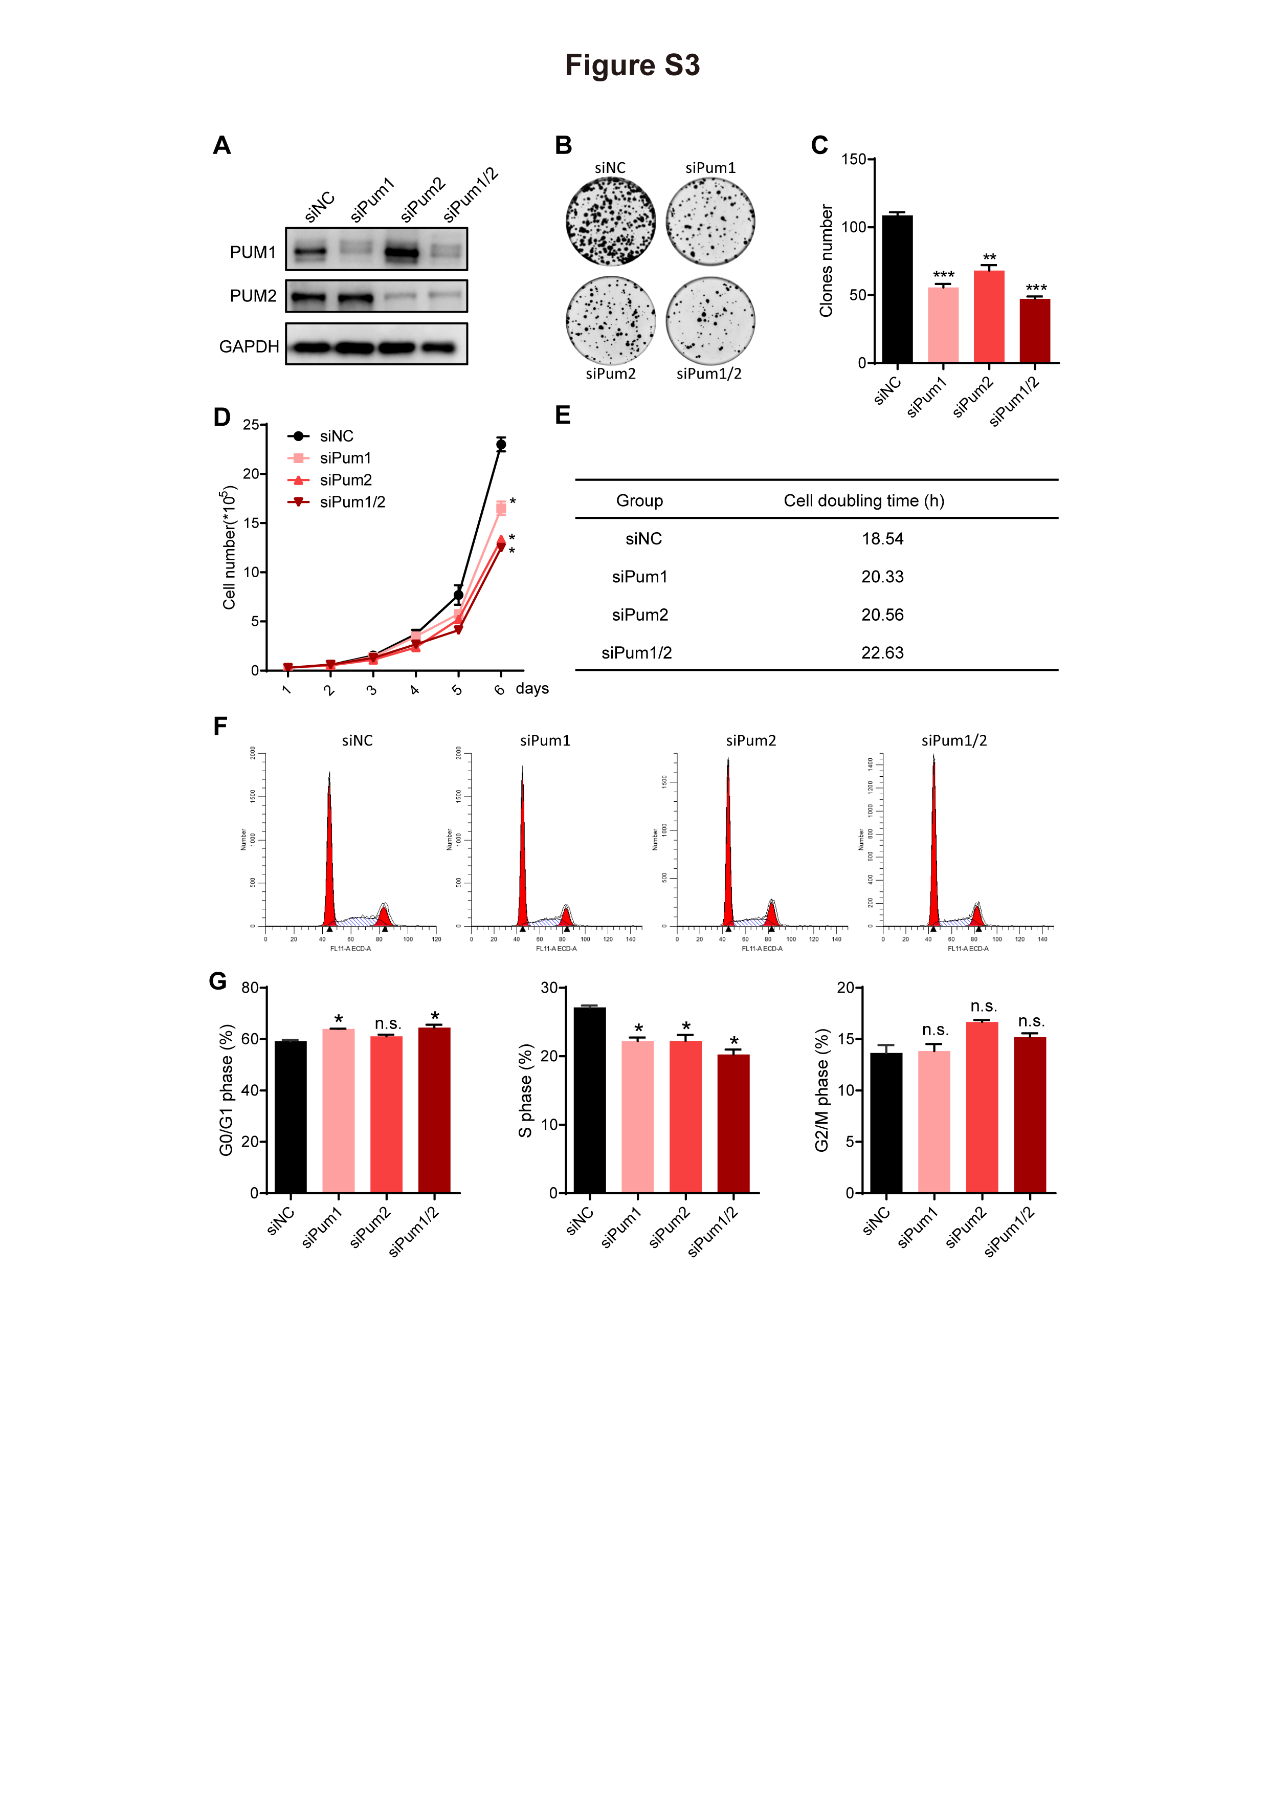


**Figure S3. Knockdown of *Pumilio* impairs colorectal cancer cells growth**

(A) Detection of knockdown efficiency of PUM1 and PUM2 by western blot.

(B) Colony formation assay of HCT116 cells transfected with siNC (100 nM), siPum1 (100 nM), siPum2 (100 nM), and siPum1/2 (100 nM), respectively. Colony numbers were counted after 10 days.

(C) Quantification of clones in (B).

(D) Growth curve of HCT116 cells transfected with siNC (100 nM), siPum1 (100 nM), siPum2 (100 nM), and siPum1/2 (100 nM), respectively.

(E) Cell doubling time is calculated by the data in (D).

(F) Cell cycle of indicated HCT116 cells is determined by PI staining and cytometry analysis.

(G) Quantification of cell cycle by ModFit software. Three biological repeats are done. **P <* 0.05, ***P <* 0.01, ****P <* 0.001.


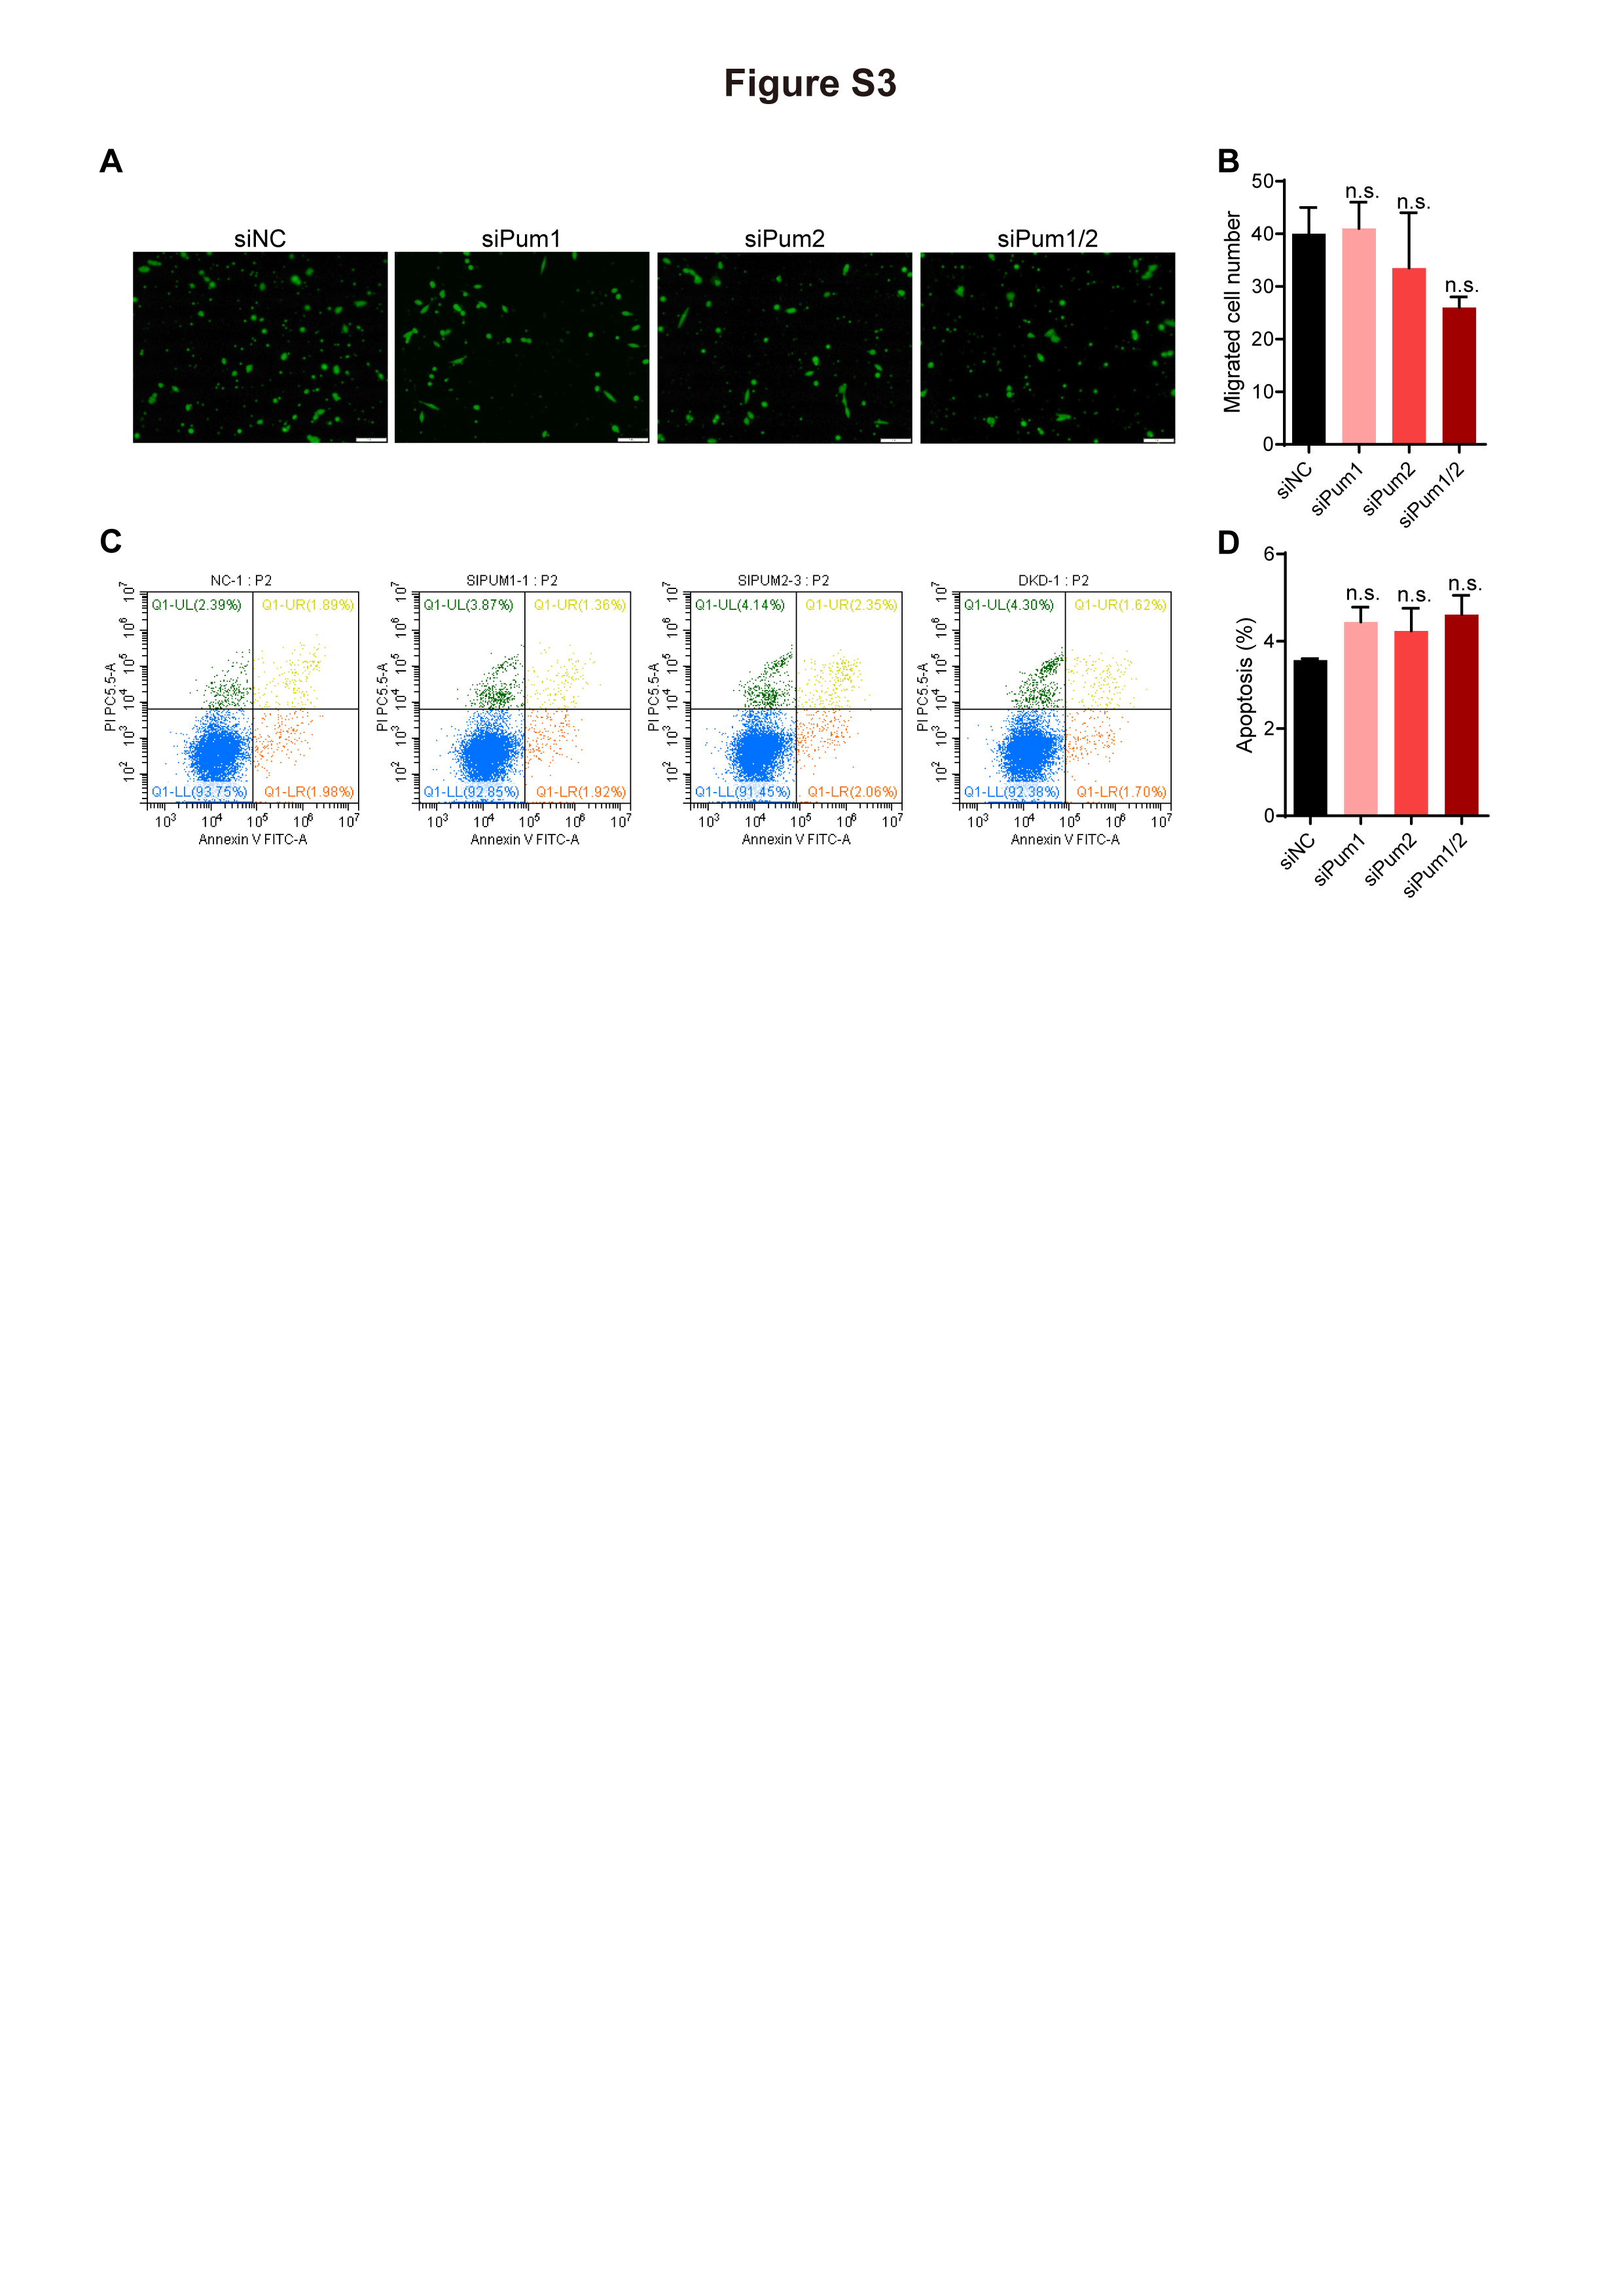


**Figure S4. Knockdown of *Pumilio* has no significant effect on colorectal cancer cells migration and apoptosis**

(A) Transwell assay of HCT116 cells transfected with siNC (100 nM), siPum1 (100 nM), siPum2 (100 nM), and siPum1/2 (100 nM), respectively. Scale bar = 100 μm.

(B) Quantification of (A).

(C) Flow cytometry analysis of cell apoptosis in indicated HCT116 cells using Annexin V and 7AAD.

(D) Quantification of (C).


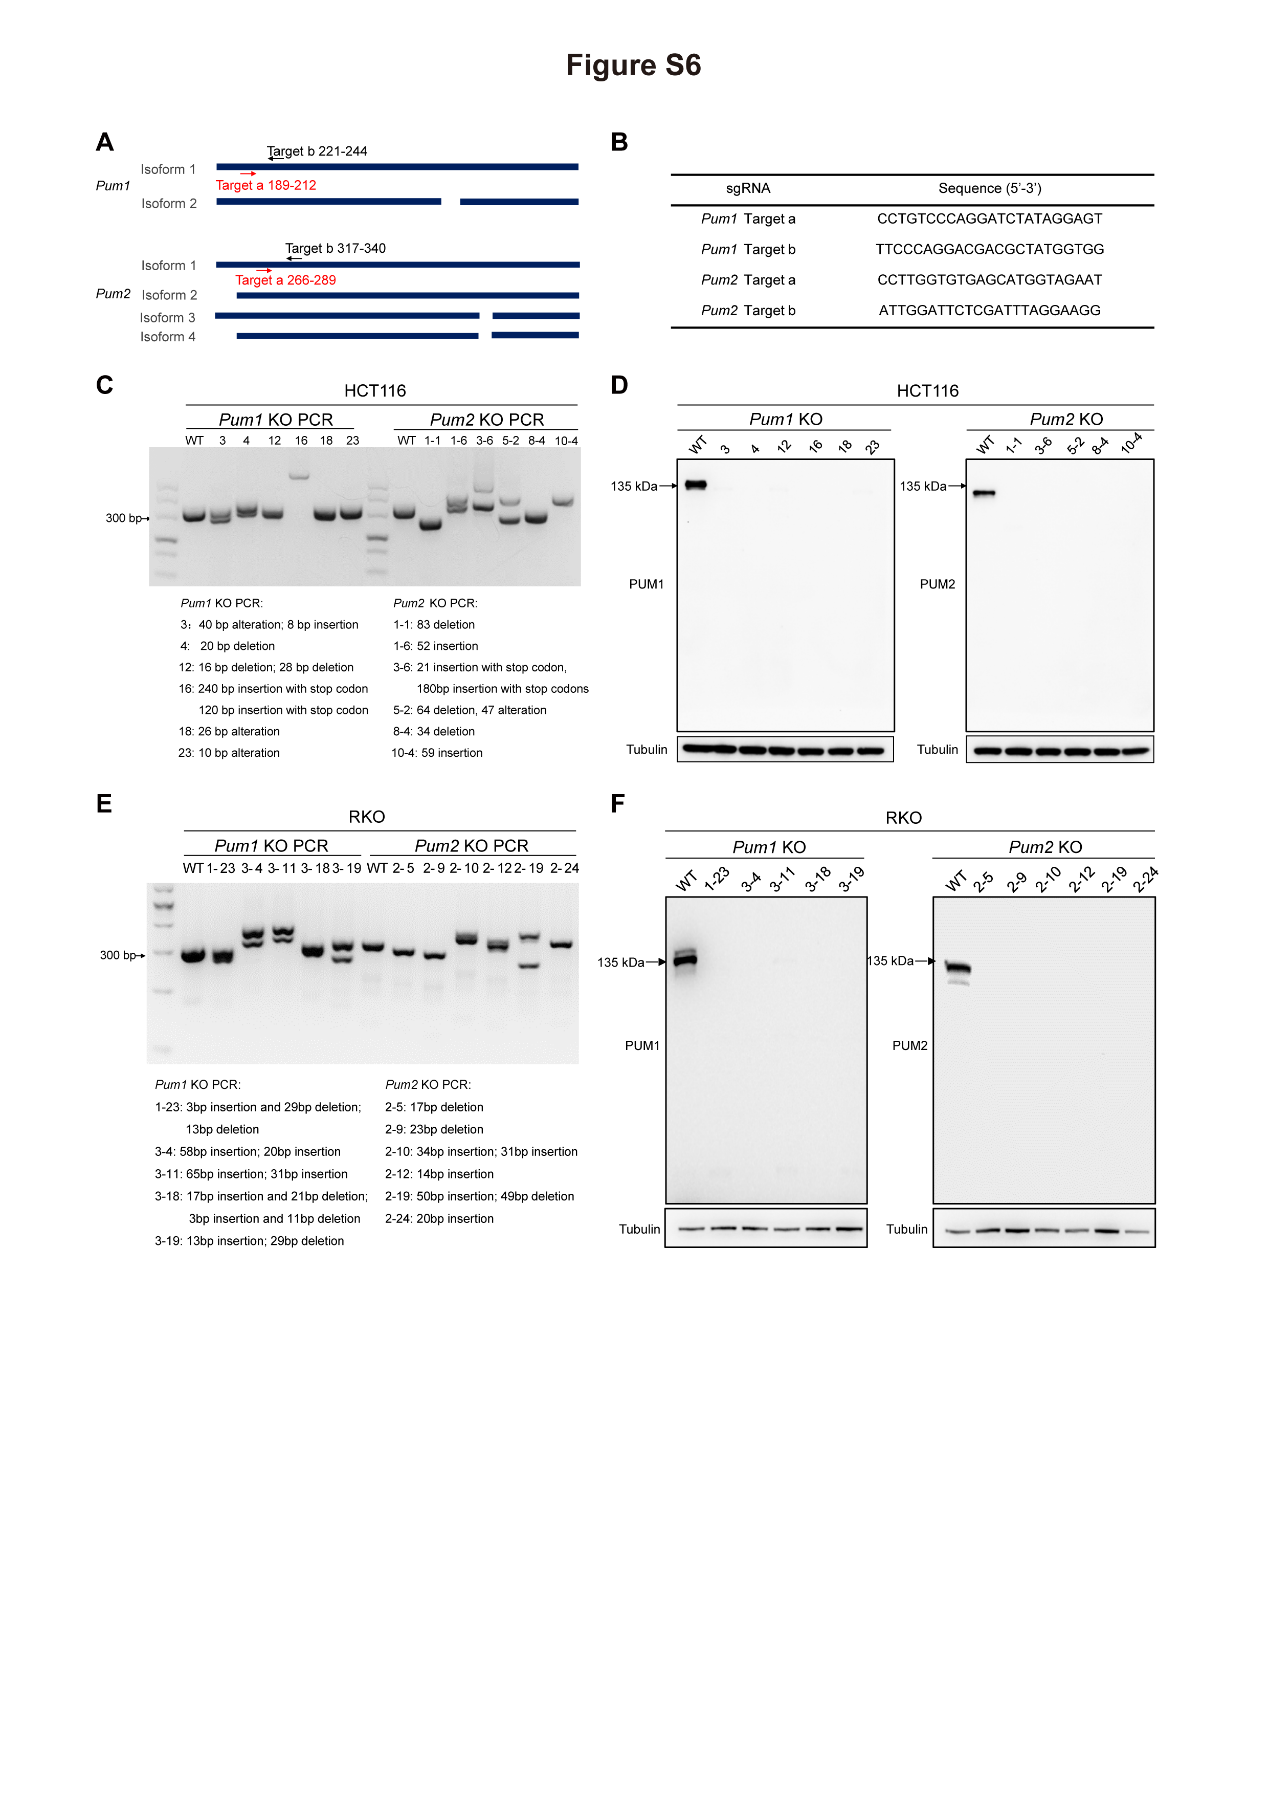


**Figure S5. Design of sgRNA for *Pumilio* gene knockout**

(A) Designed sgRNAs target to all isoforms of *Pum1* and *Pum2*.

(B) Sequence of sgRNAs, designed by online website http://crispr.mit.edu/.

(C-F) *Pum1-/-* and *Pum2-/-* HCT116 (C) or RKO (E) cell lines are validated by genome PCR and gene mutations are shown below. Validation of *Pum1-/-* and *Pum2-/-* HTC116 (D) or RKO (F) cell lines by western blotting. No protein truncation can be observed. Tubulin is used as reference gene.


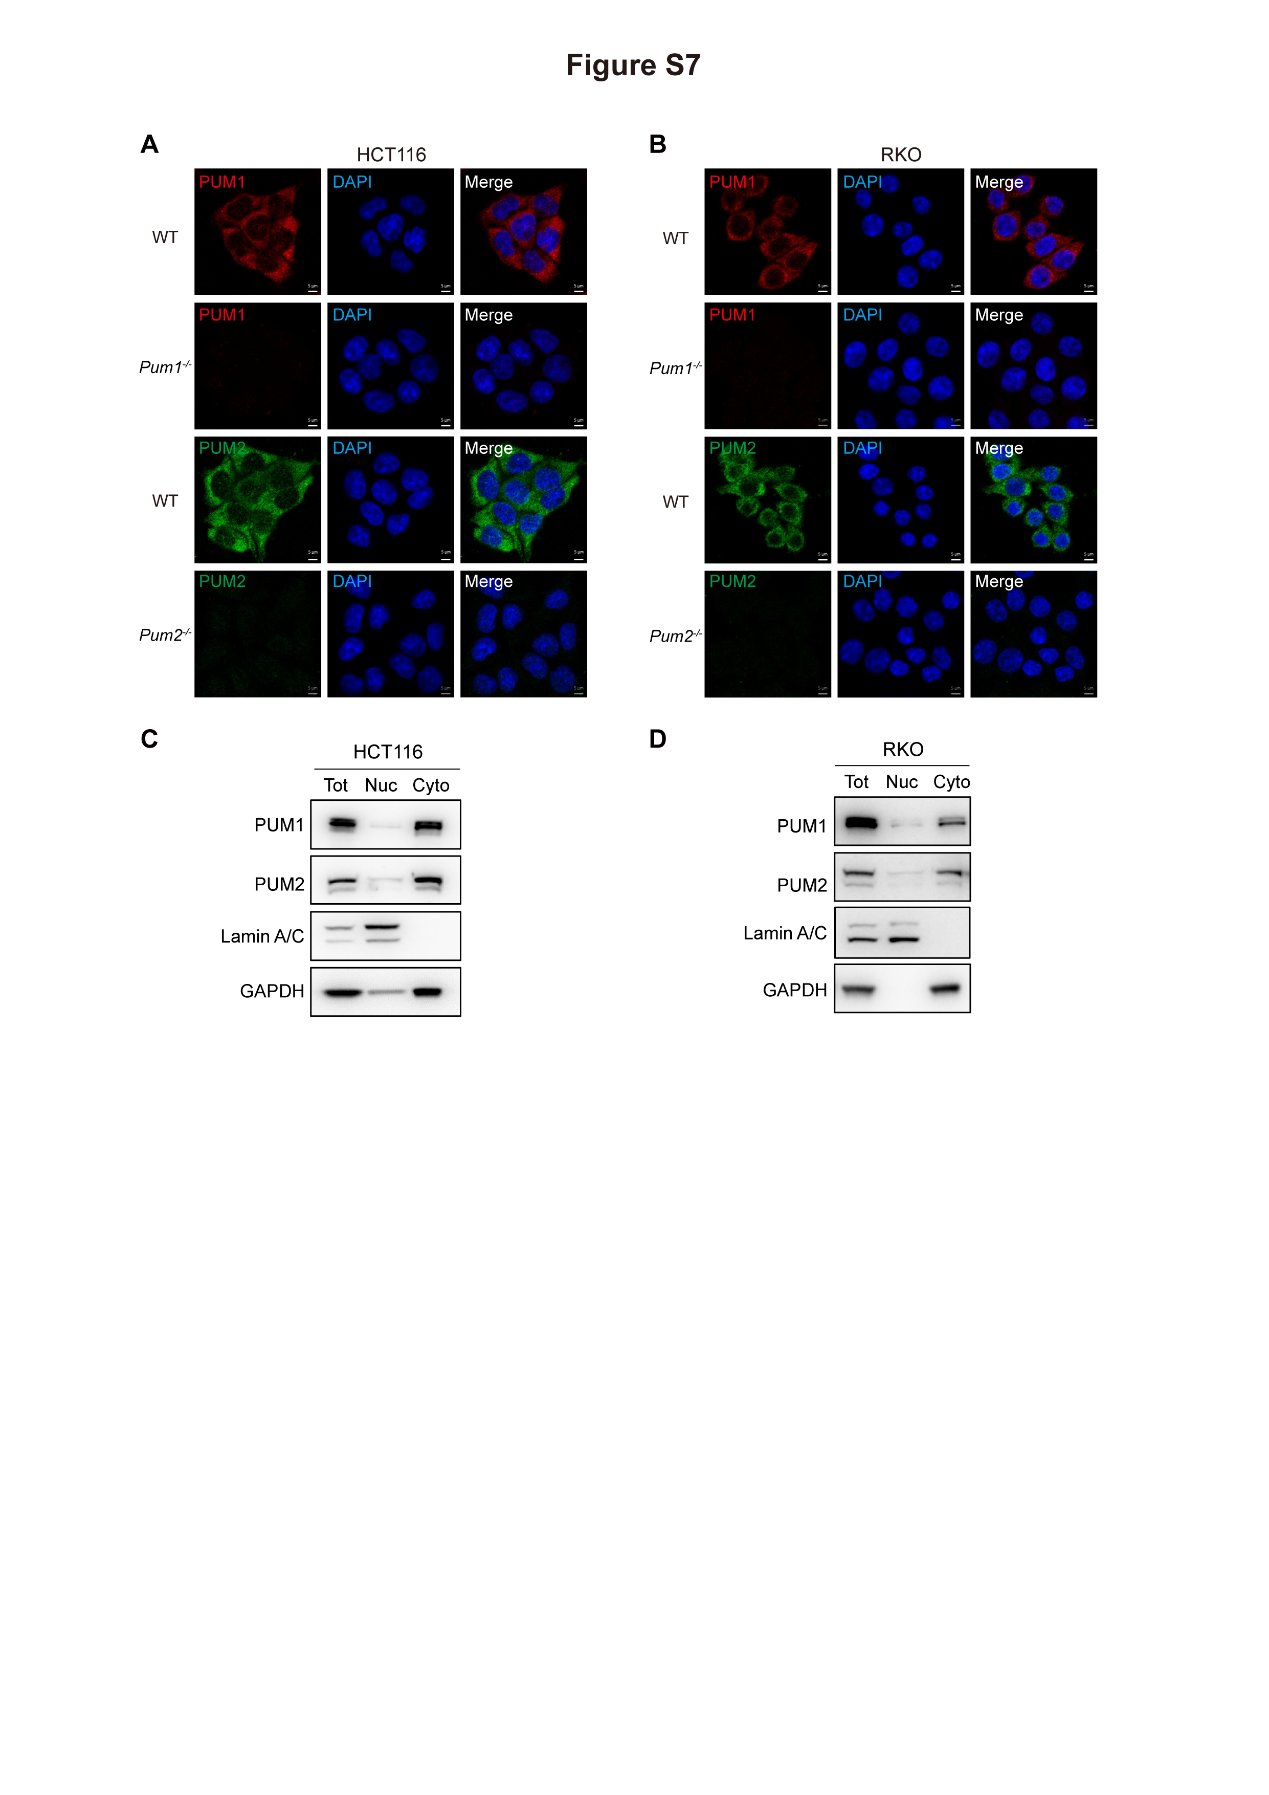


**Figure S6. PUM1 and PUM2 are localized in the cytoplasm of HCT116 cells**

(A and B) Immunofluorescence staining of PUM1 and PUM2 in WT, *Pum1*-/-, and *Pum2*-/- HCT116 (A) or RKO (B) cells.

(C and D) Expression of PUM1 and PUM2 in the cytoplasm and nucleus of HCT116 (C) or RKO (D) cells, as indicated by subcellular fractionation and Western blotting analysis, in which GAPDH and Lamin A/C were used as cytoplasmic and nuclear markers, respectively.


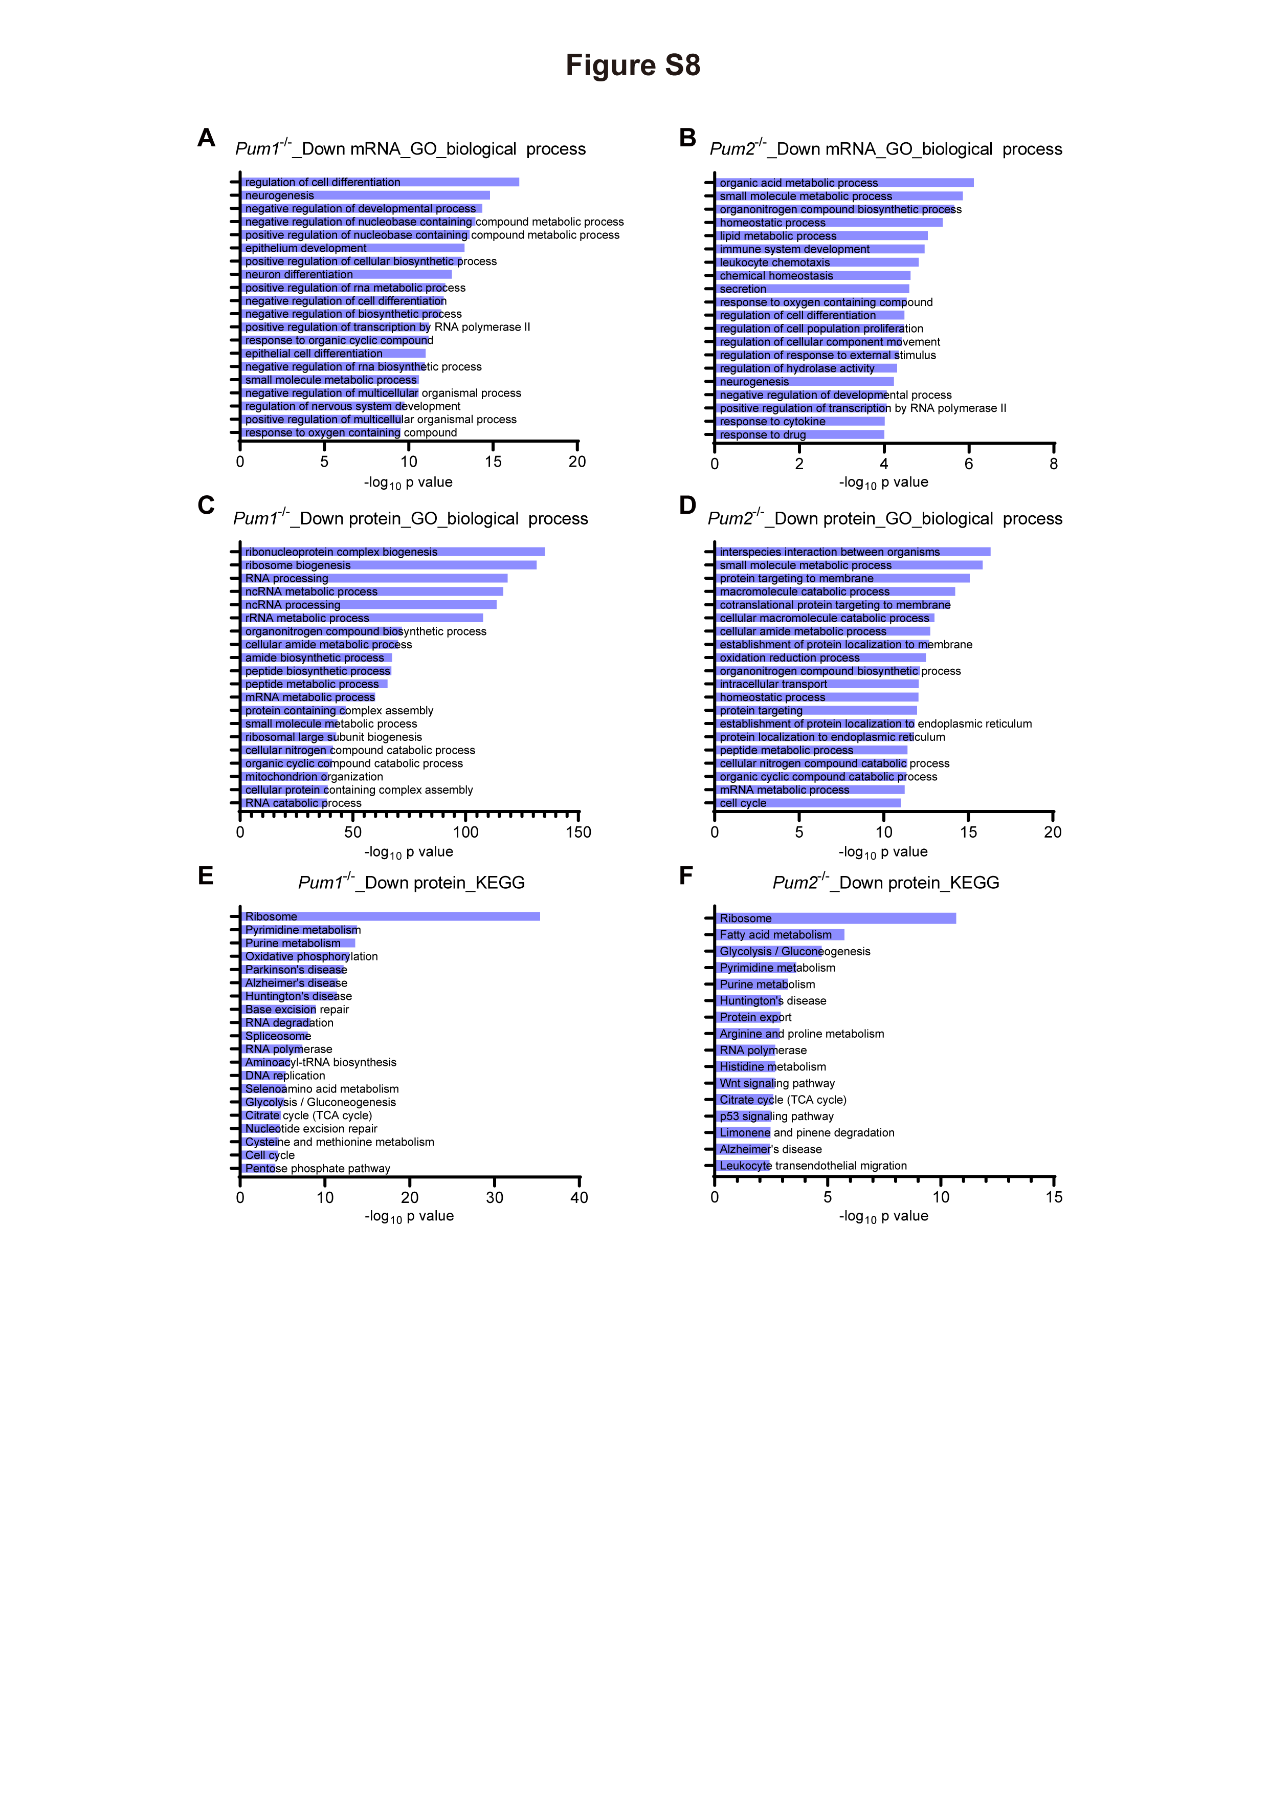


**Figure S7. GO and KEGG analysis of downregulated mRNAs and proteins in *Pum1*-/- and *Pum2*-/- HCT116 cells**

(A and B) GO analysis of downregulated mRNAs in *Pum1*-/- (A) or *Pum2*-/- (B) HCT116 cells.

(C and D) GO analysis of downregulated proteins in *Pum1*-/- (C) or *Pum2*-/- (D) HCT116 cells.

(E and F) KEGG analysis of downregulated proteins in *Pum1*-/- (E) or *Pum2*-/- (F) HCT116 cells.


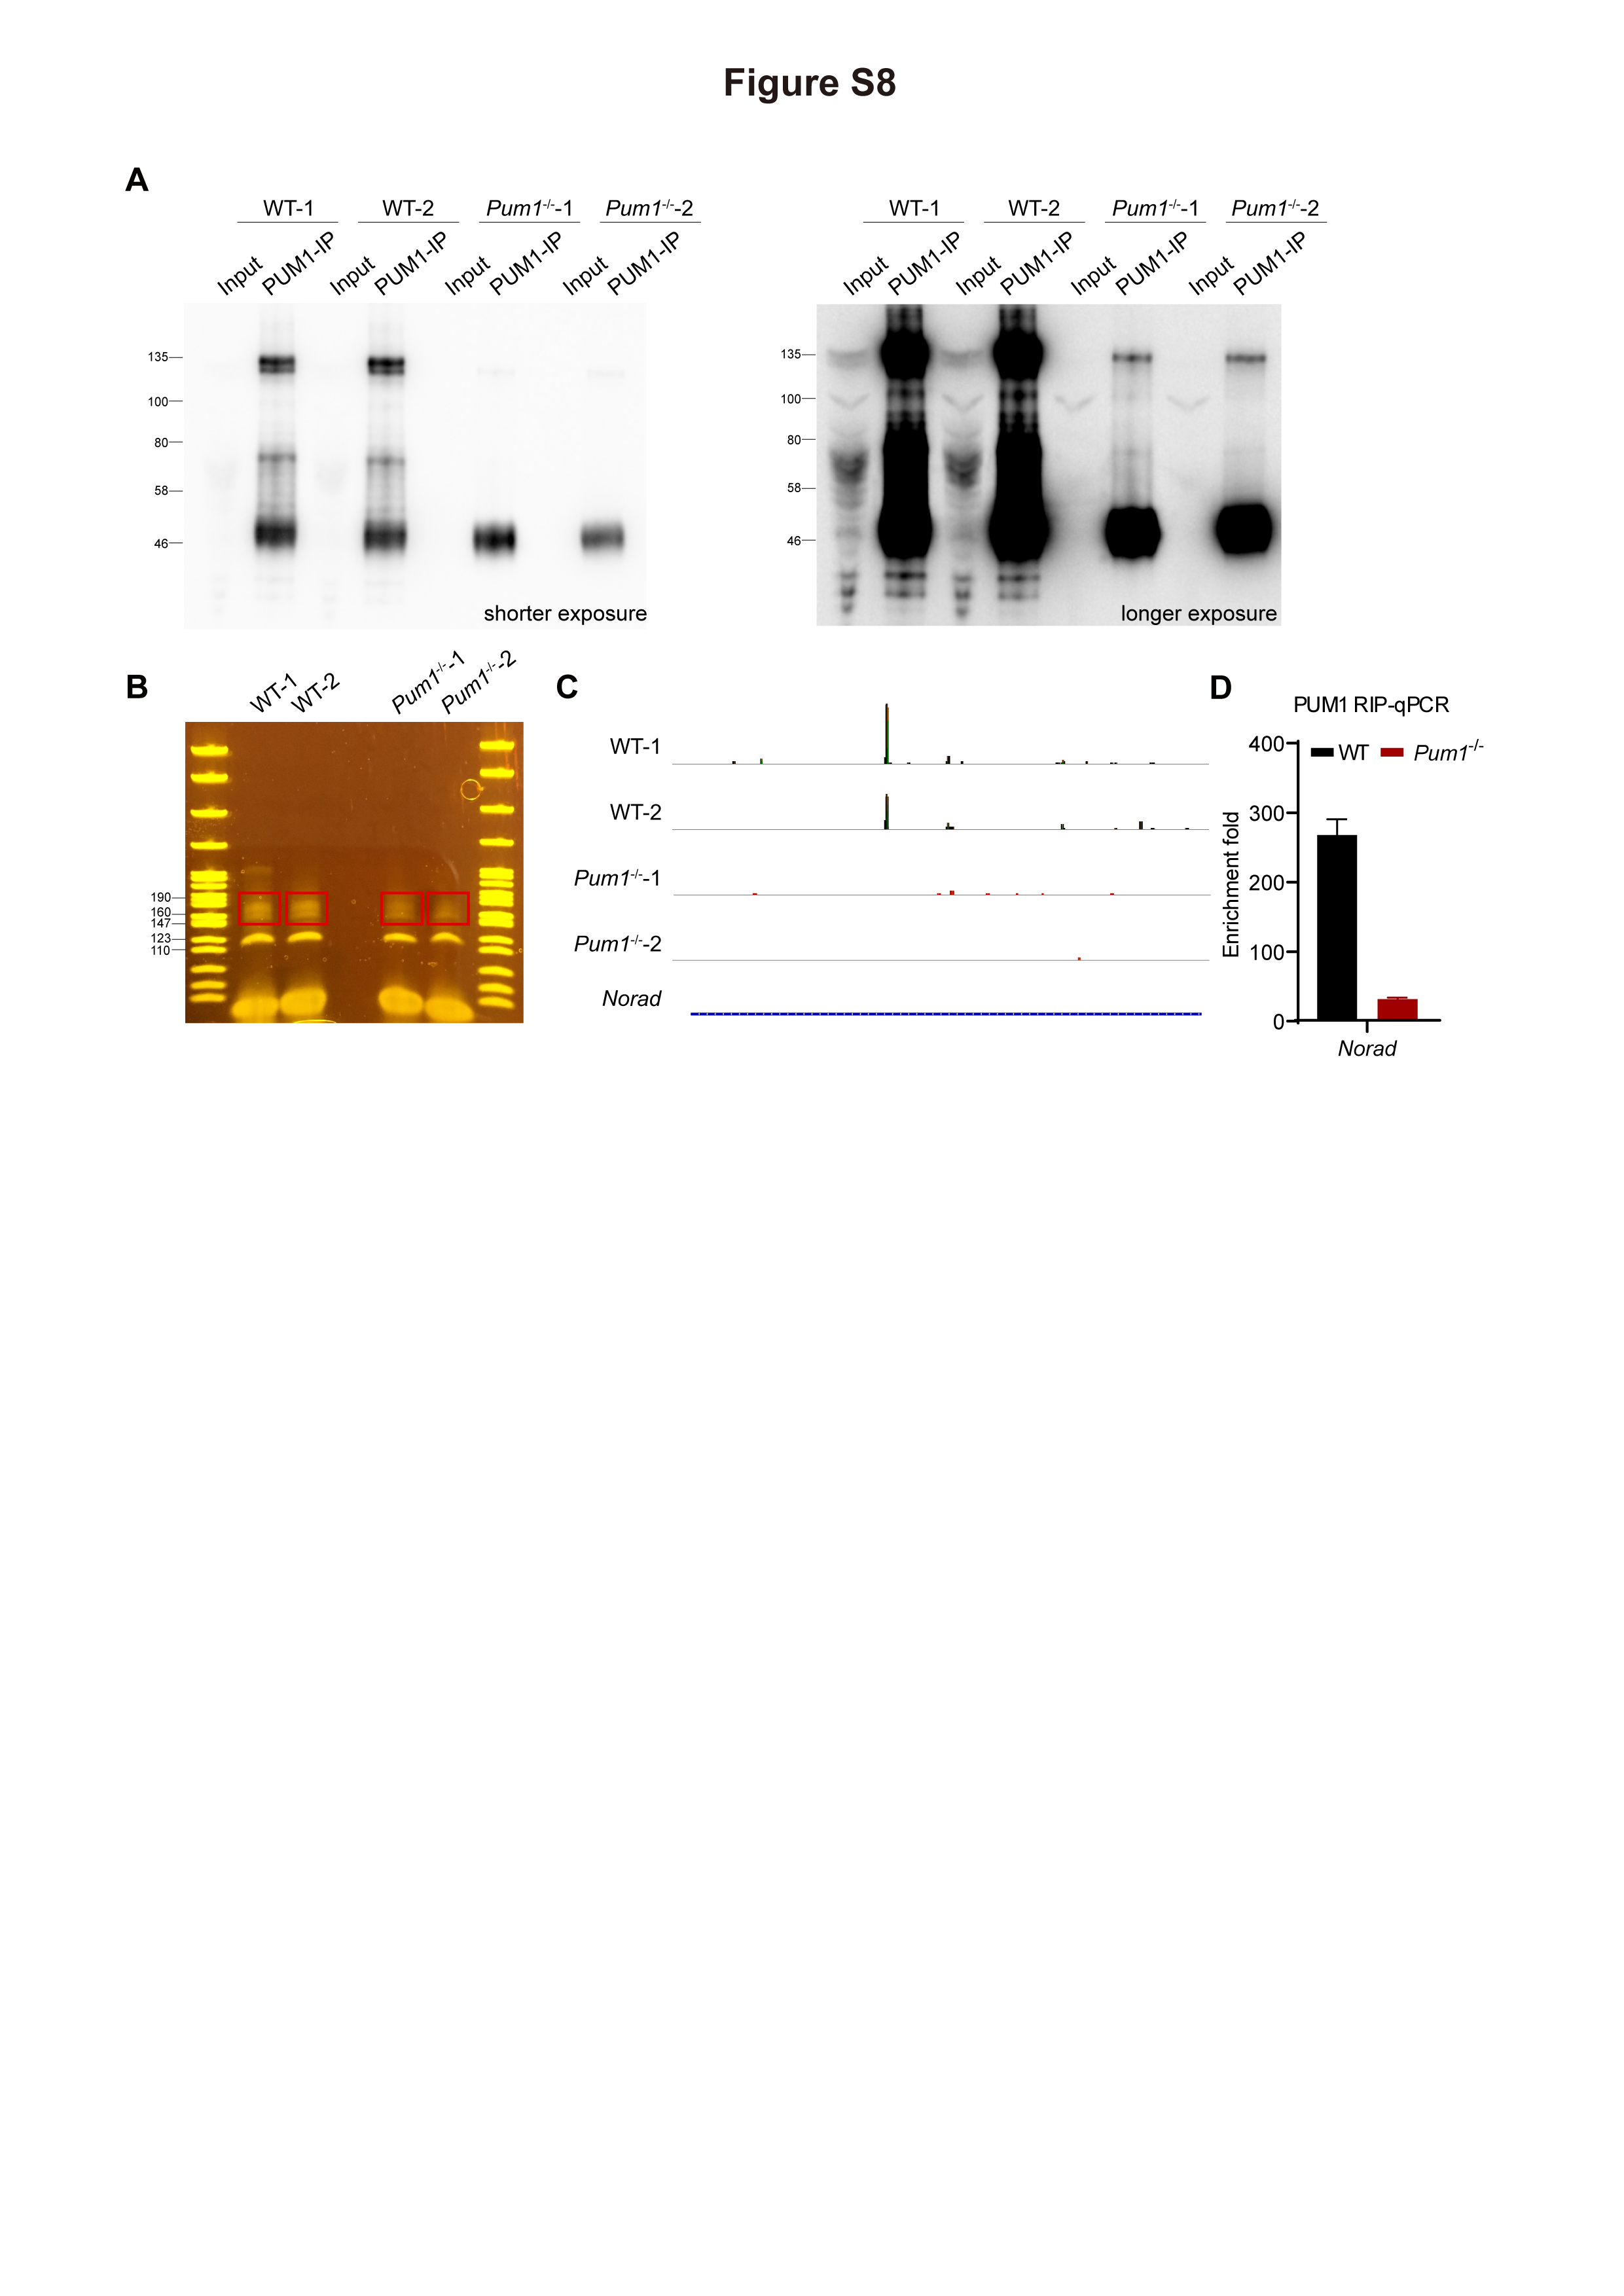


**Figure S8. PAR-CLIP assay of PUM1 in HCT116 cells**

(A) PUM1 PAR-CLIP was performed in WT, and *Pum1-/-* as negative control. Western blot of PUM1-IP validated the IP efficiency for PUM1 antibody.

(B) Library preparation for PUM1 PAR-CLIP-seq. The cDNA was separated on the gel and labeled bands were cut to avoid primer dimer contamination.

(C) PUM1 PAR-CLIP peaks on the long non-coding RNA *Norad* in WT and *Pum1-/-* HCT116 cells.

(D) PUM1 RIP-qPCR validation of the target *Norad*.


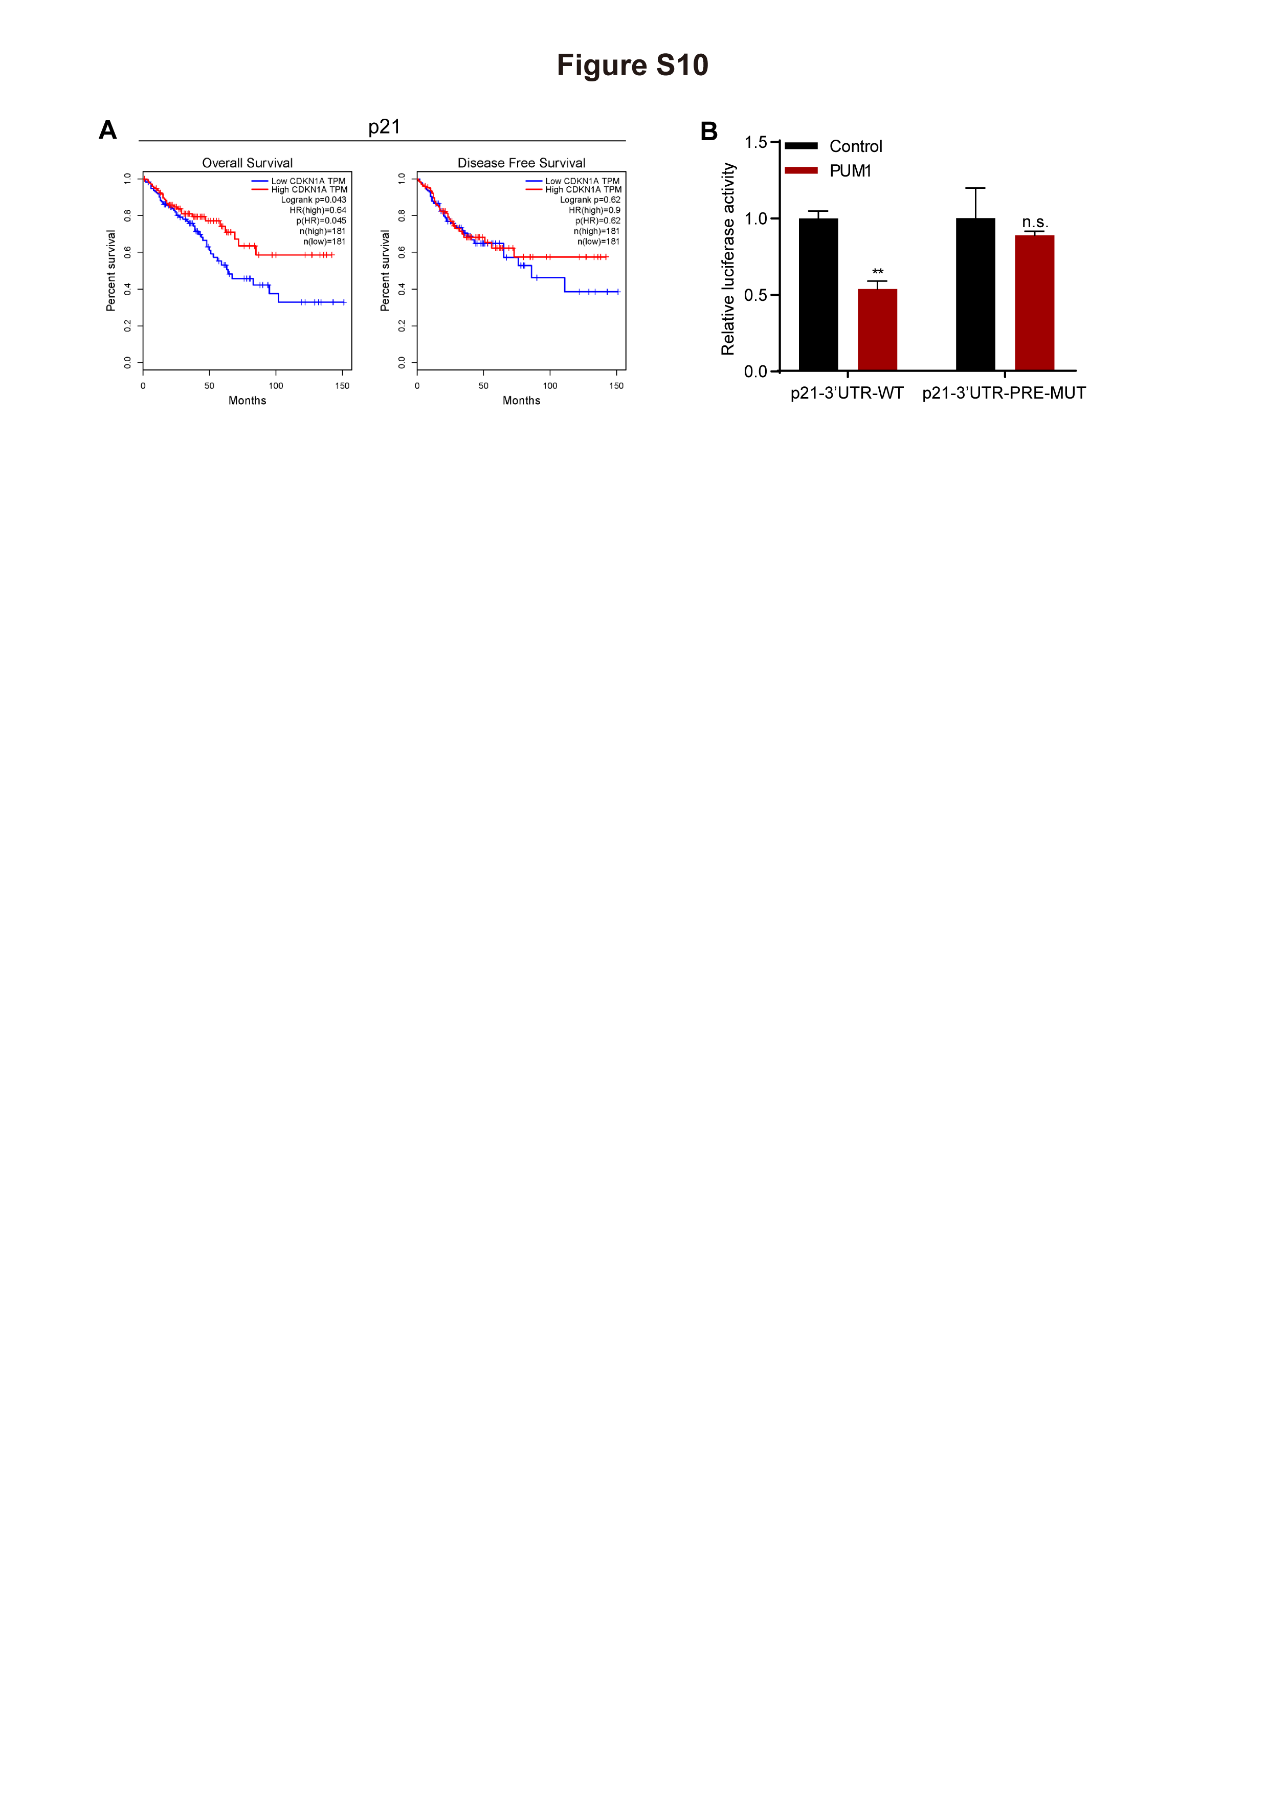


**Figure S9. Correlation analysis of p21 and PUM1 in colorectal cancer**

(A) Clinical overall survival and disease free survival of colorectal cancer patients with different levels of p21.

(B) The luciferase activity of the p21 3’UTR reporter in HCT116 cells transfected with 100 ng PUM1 overexpression plasmid, 100 ng of the p21-3’UTR-WT or p21-3’UTR-PRE-MUT reporter plasmid for 48 hours. **P <* 0.05, ***P <* 0.01.


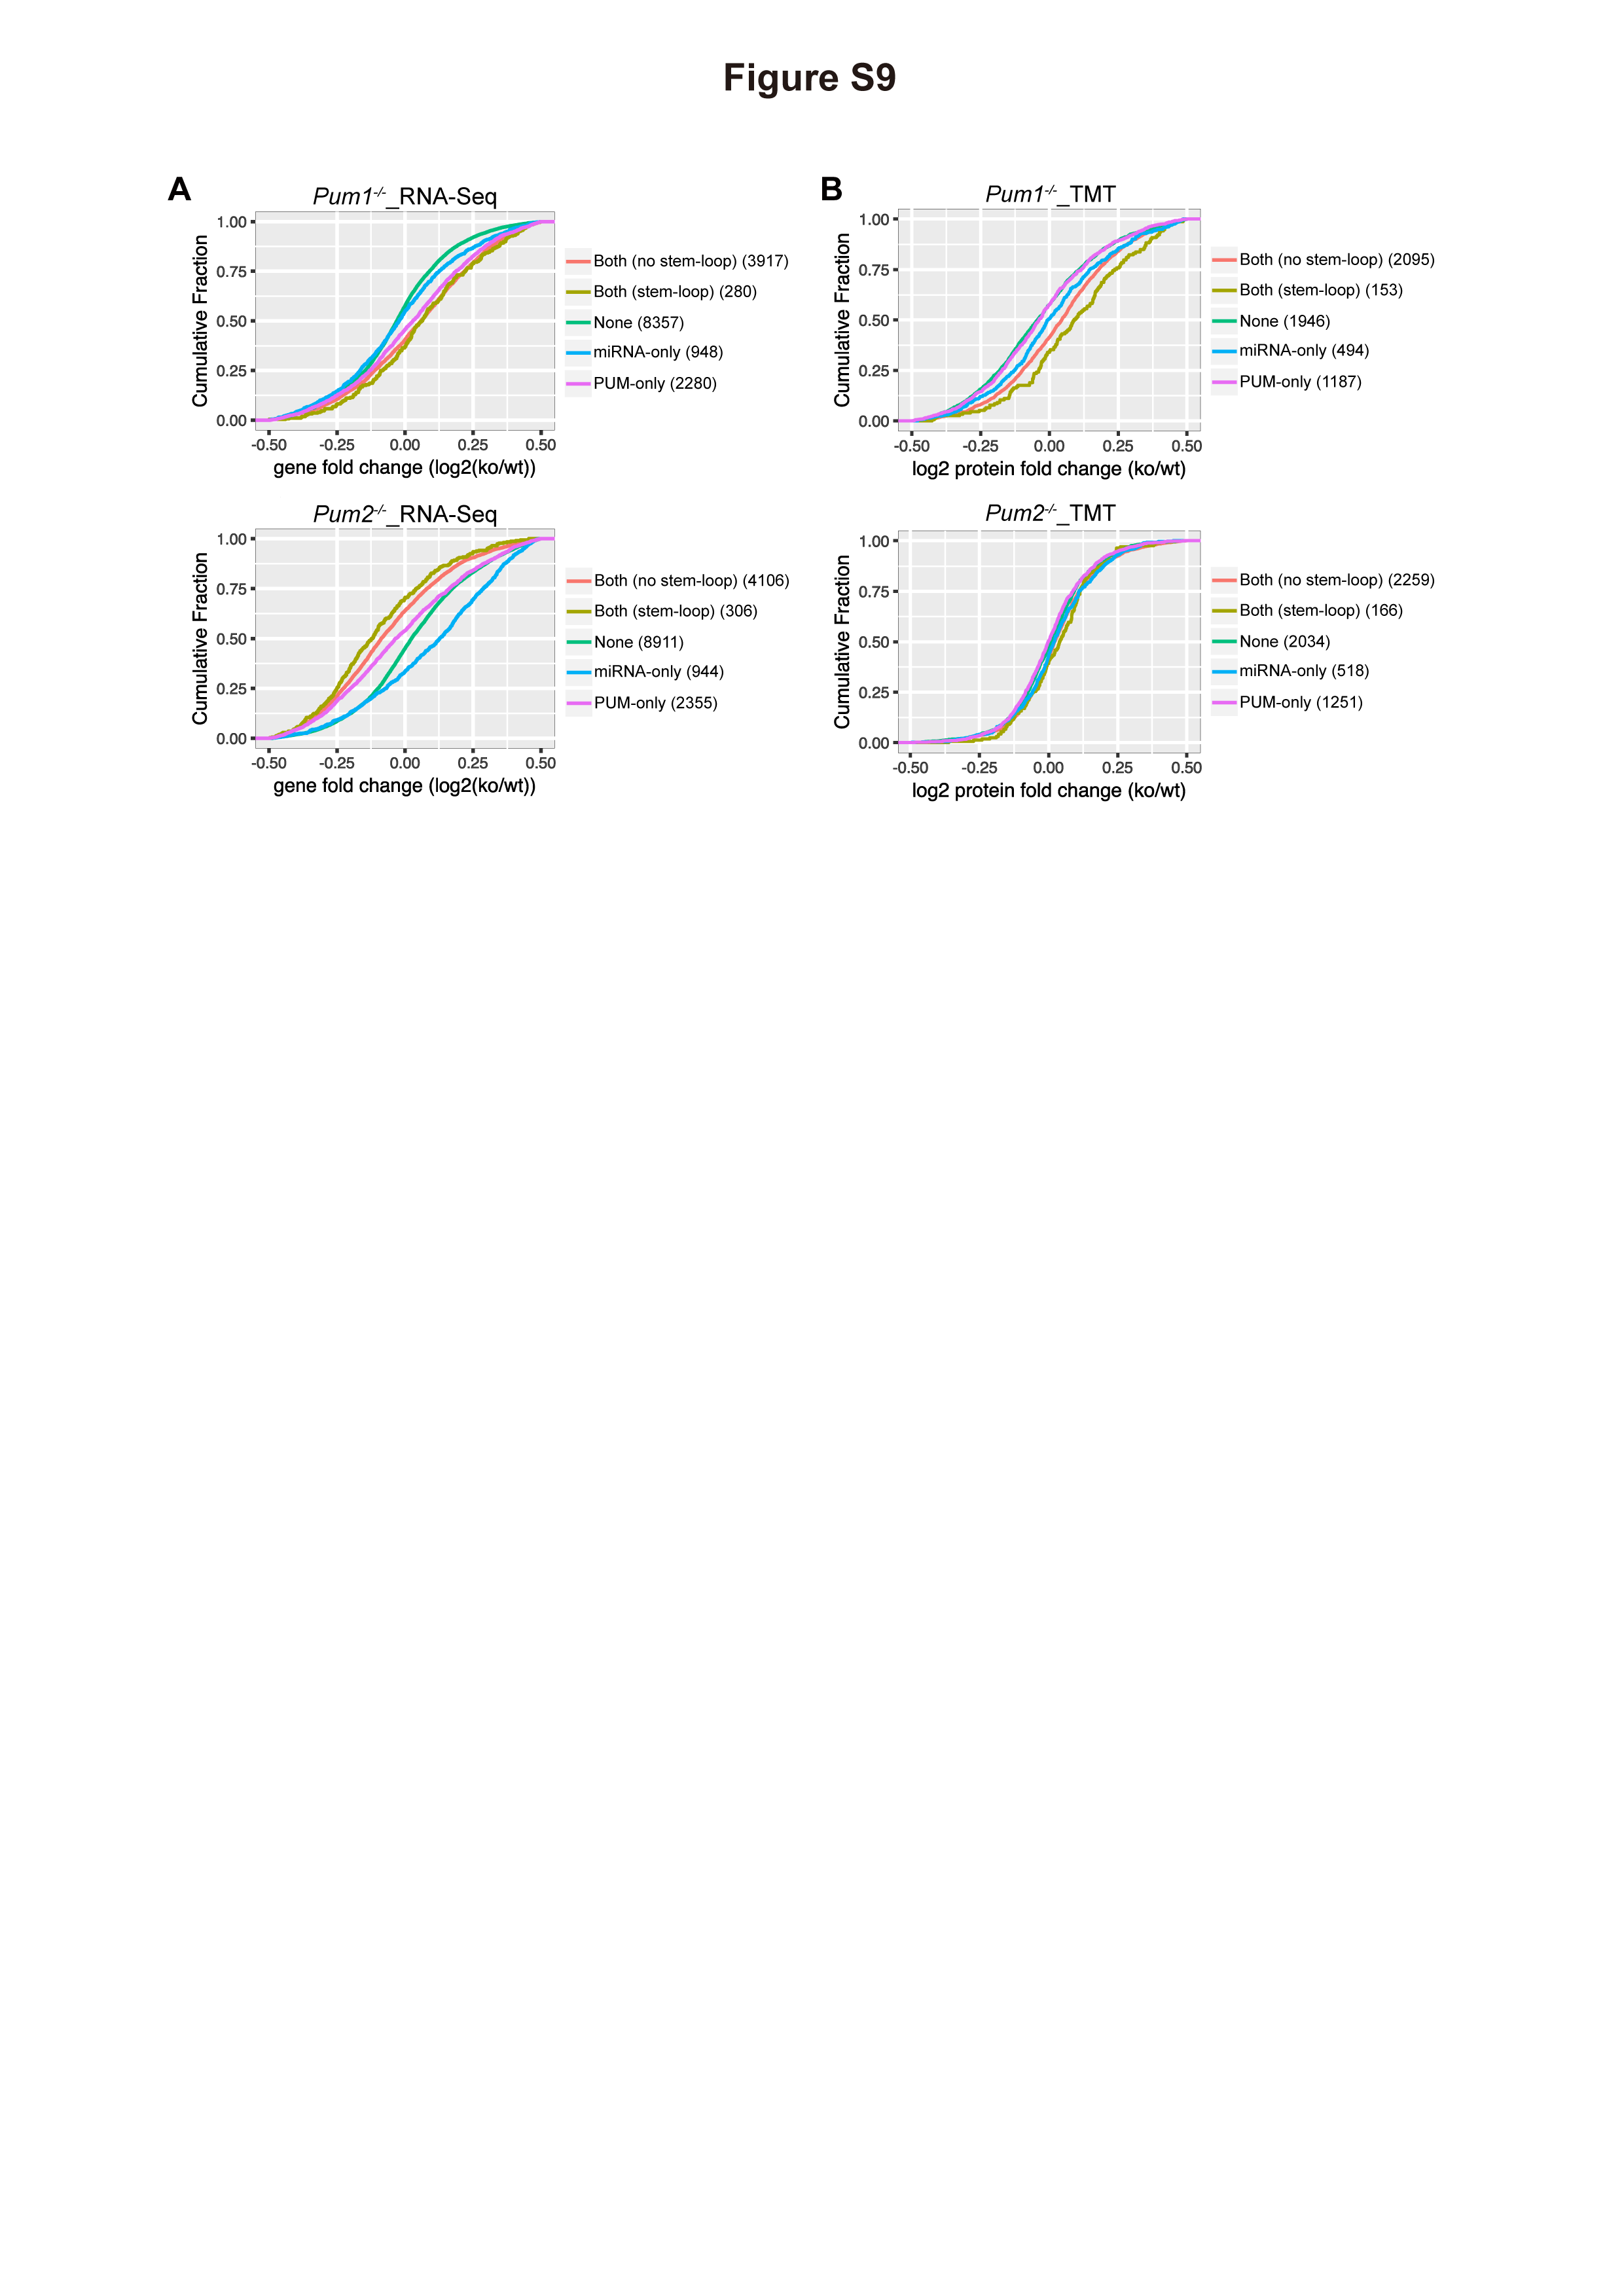


**Figure S10. miRNAs are involved in the regulation of PUM1 target genes**

(A and B) Effect of co-occurrence of PUMILIO and miRNA sites to differential expression of transcripts (A) or proteins (B) when knockout *Pum1* (upper) or *Pum2* (lower).


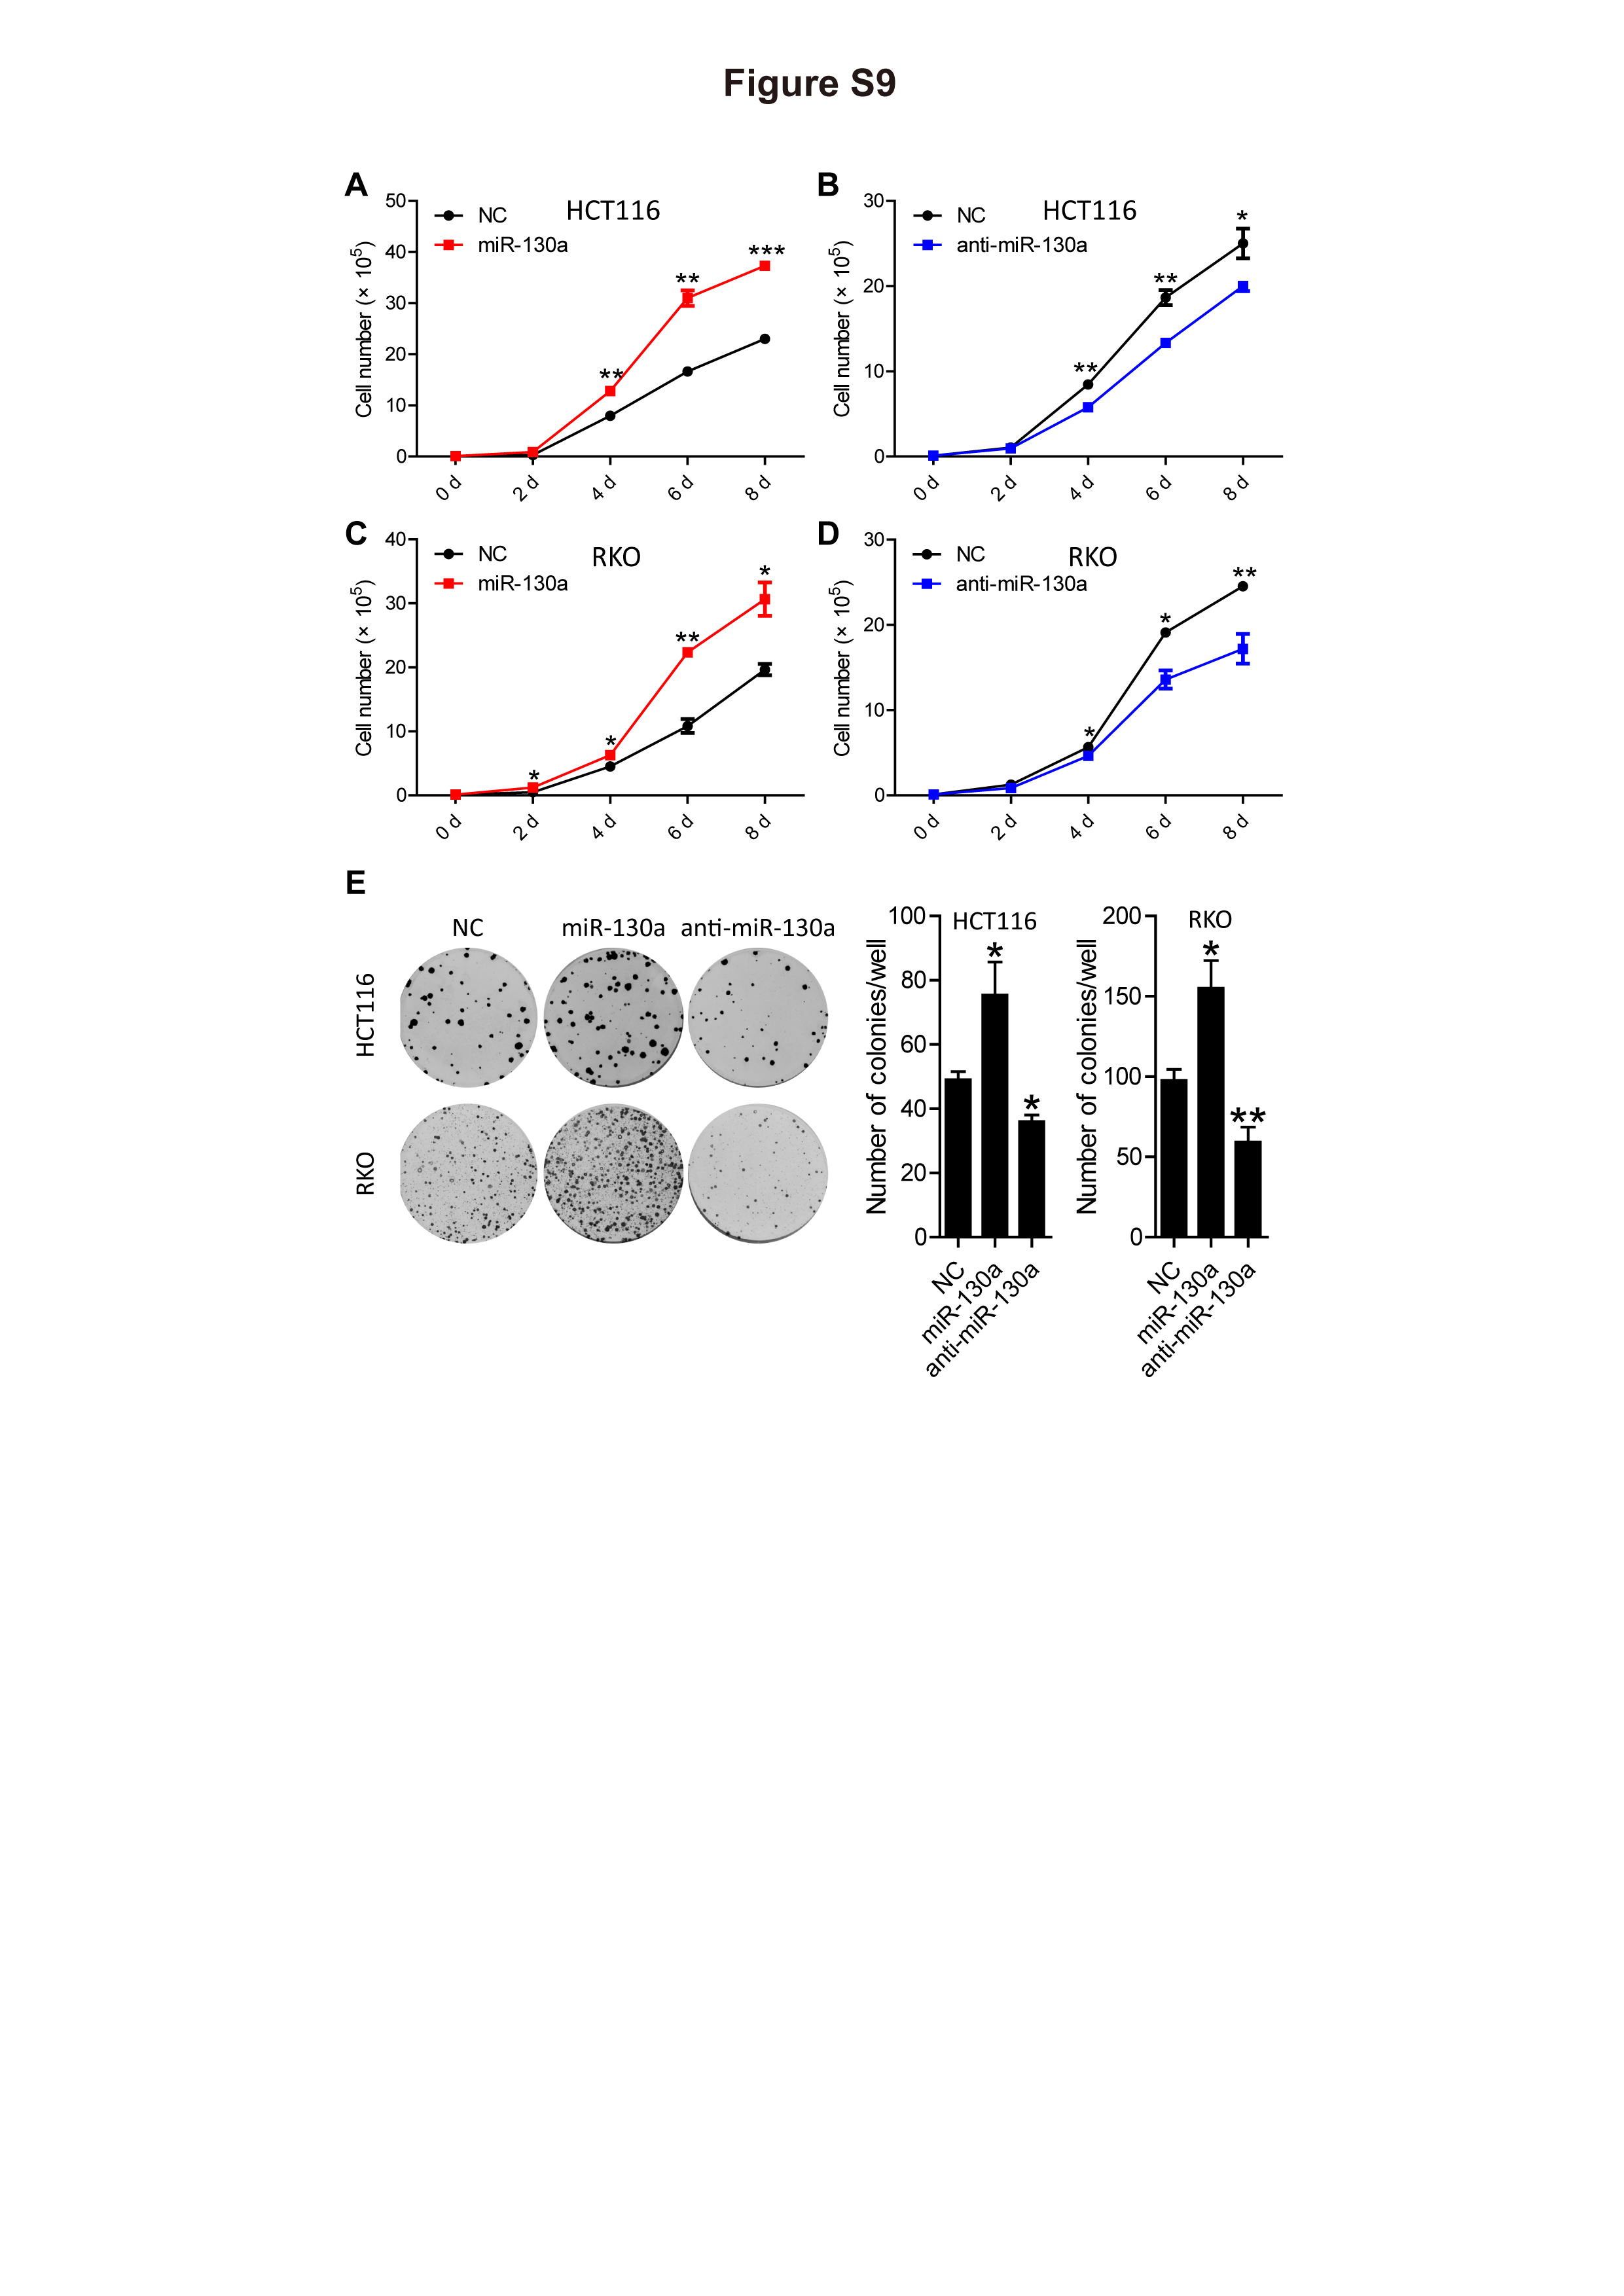


**Figure S11. miR-130a promotes the proliferation of colorectal cancer cells**

(A-D) Growth curve of HCT116 (A-B) and RKO (C-D) cells transfected with miR-130a mimics (100 nM) and inhibitors (100 nM), respectively.

(E) Colony formation assay of HCT116 and RKO cells transfected with miR-130a mimics (100 nM) and inhibitors (100 nM), respectively. Clone numbers were counted after 10 days. **P <* 0.05, ***P <* 0.01, ****P <* 0.001.


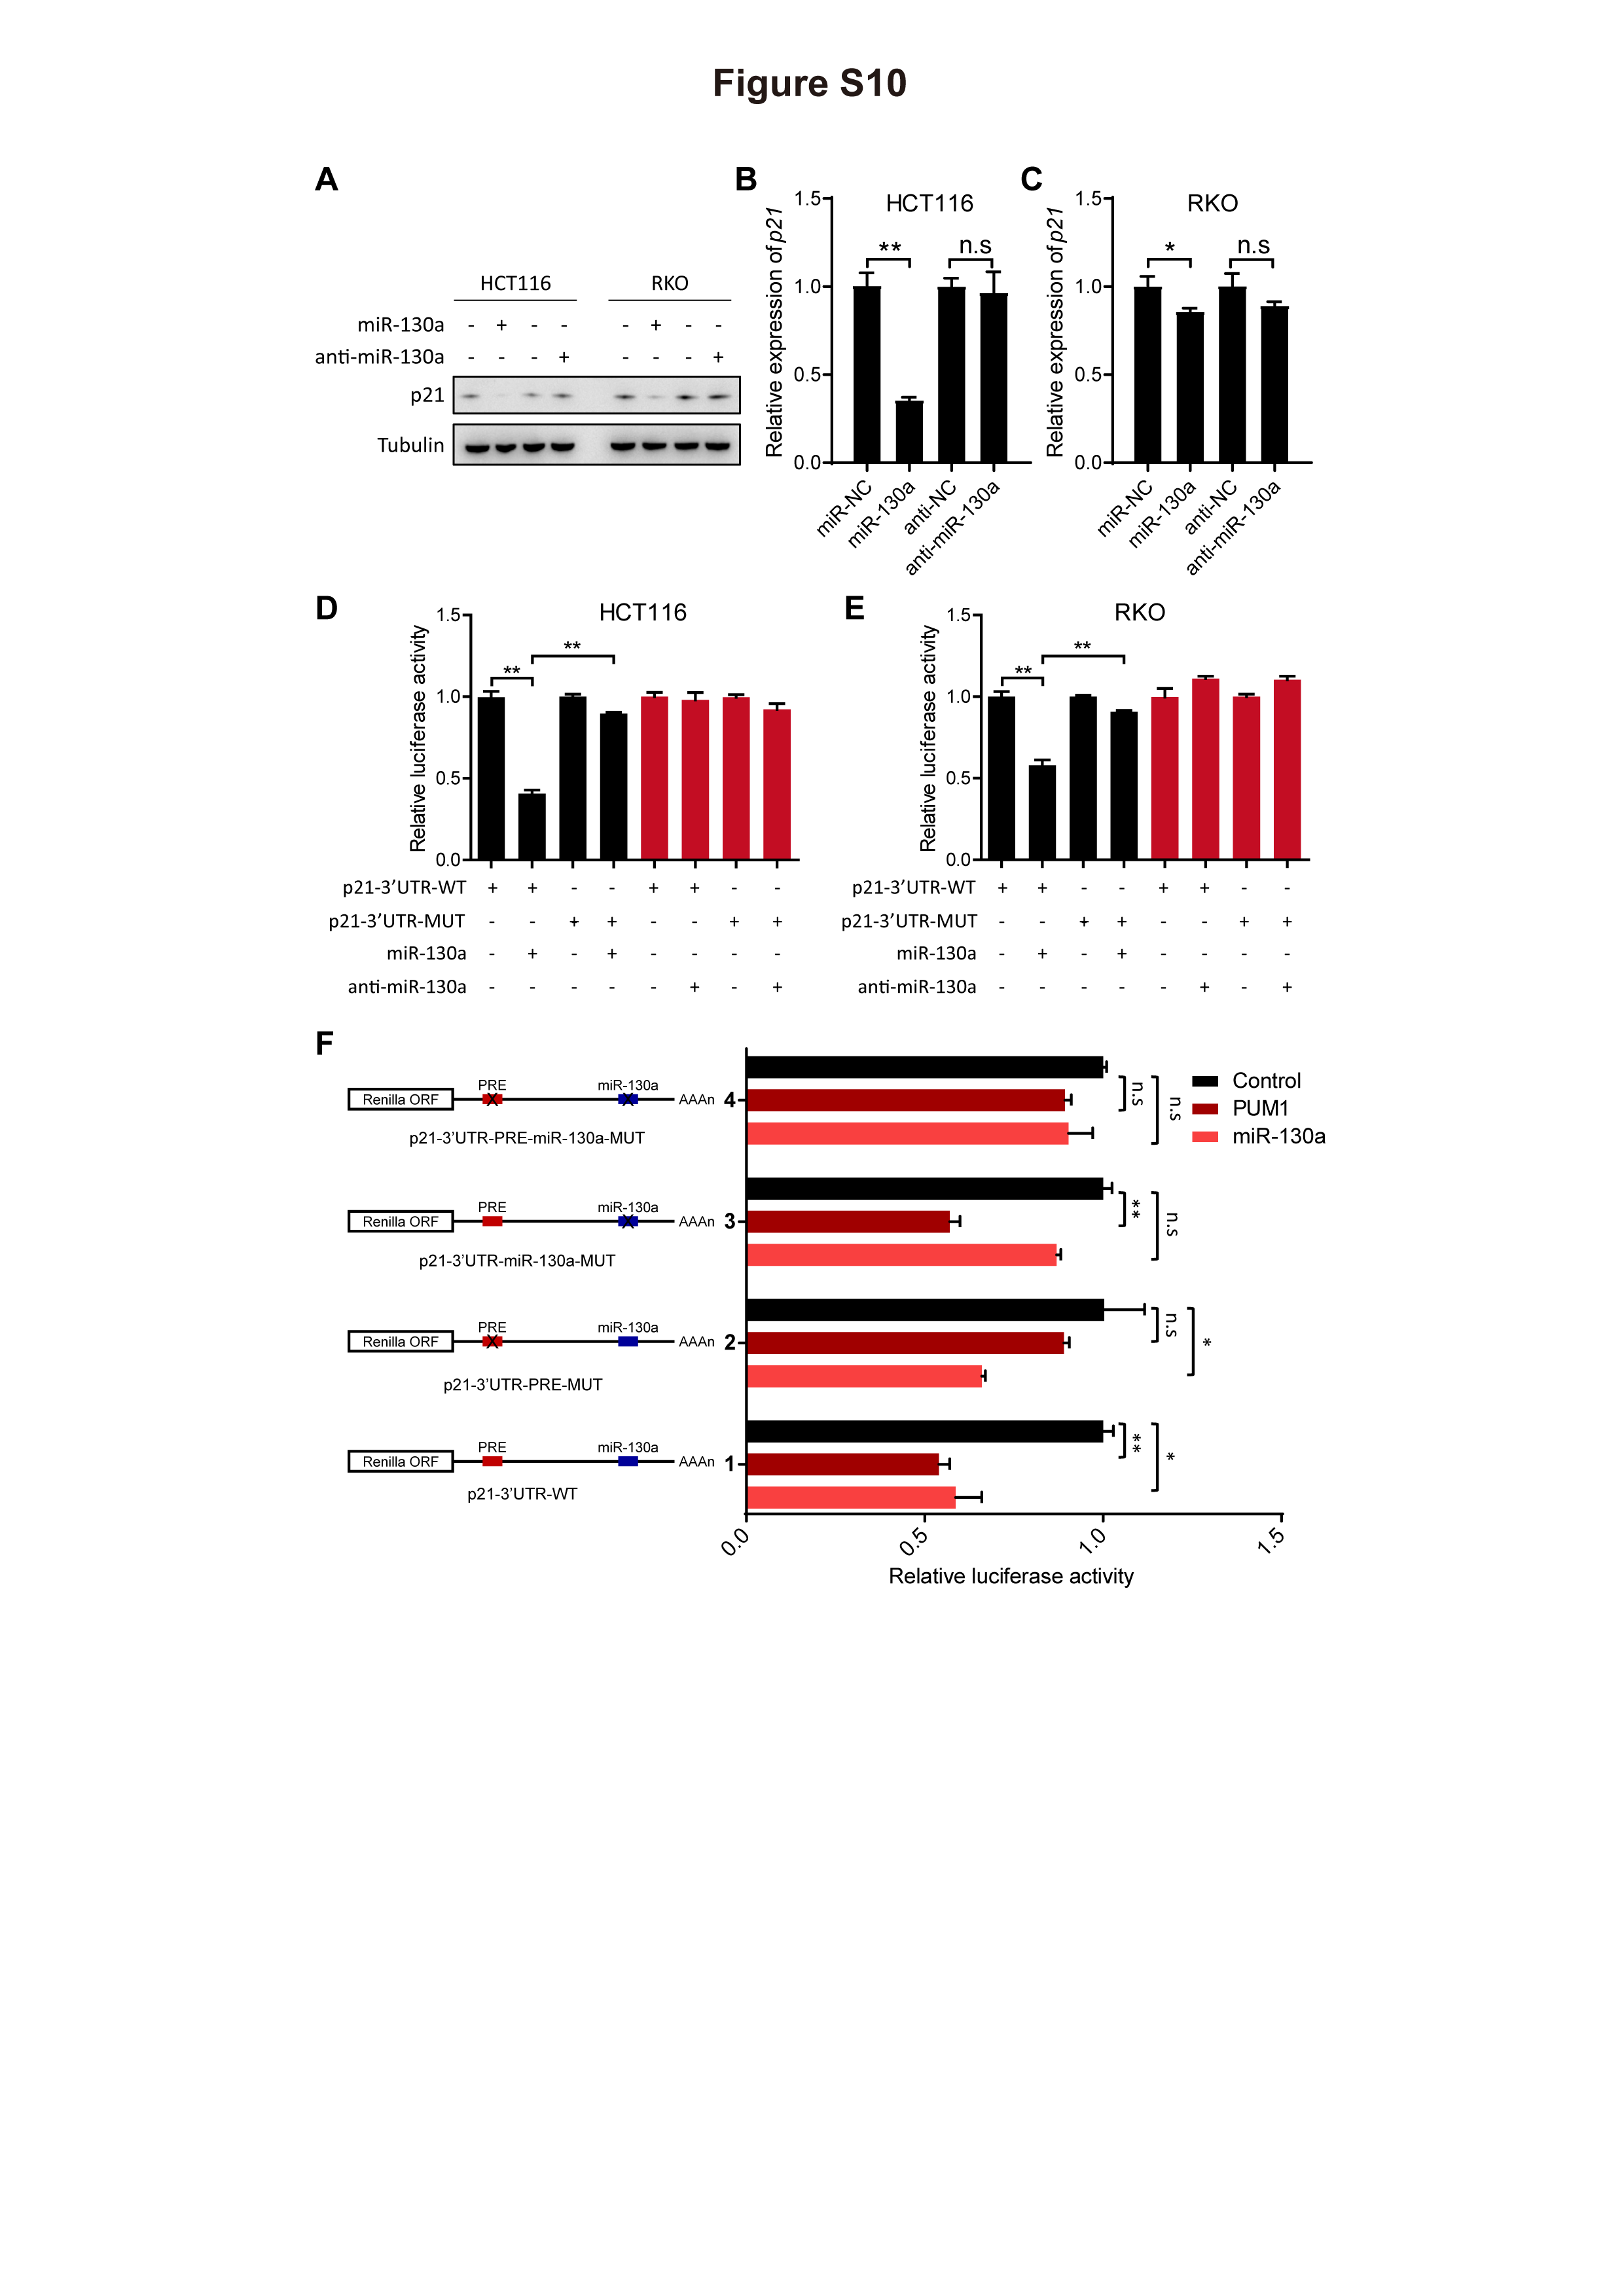


**Figure S12. p21 is the direct target of miR-130a**

(A-C) The protein (A) or mRNA (B-C) level of p21 in HCT116 and RKO cells treated with 100 nM miR-130a mimics or inhibitor for 48 hours.

(D-E) The luciferase activity of the p21 3’UTR reporter in HCT116 (D) or RKO (E) cells transfected with 100 nM miR-130a mimics or inhibitor, 100 ng of the p21-3’UTR-WT, p21-3’UTR-MUT reporter plasmid for 48 hours.

(F) The luciferase activity of the p21 3’UTR reporter in HCT116 cells transfected with 100 nM miR-130a mimics, 100 ng PUM1 overexpression plasmid, 100 ng of the p21-3’UTR-WT, p21-3’UTR-PRE-MUT, p21-3’UTR-miR-130a-MUT, and miR-p21-3’UTR-PRE-miR-130a-MUT reporter plasmid for 48 hours. **P <* 0.05, ***P <* 0.01.


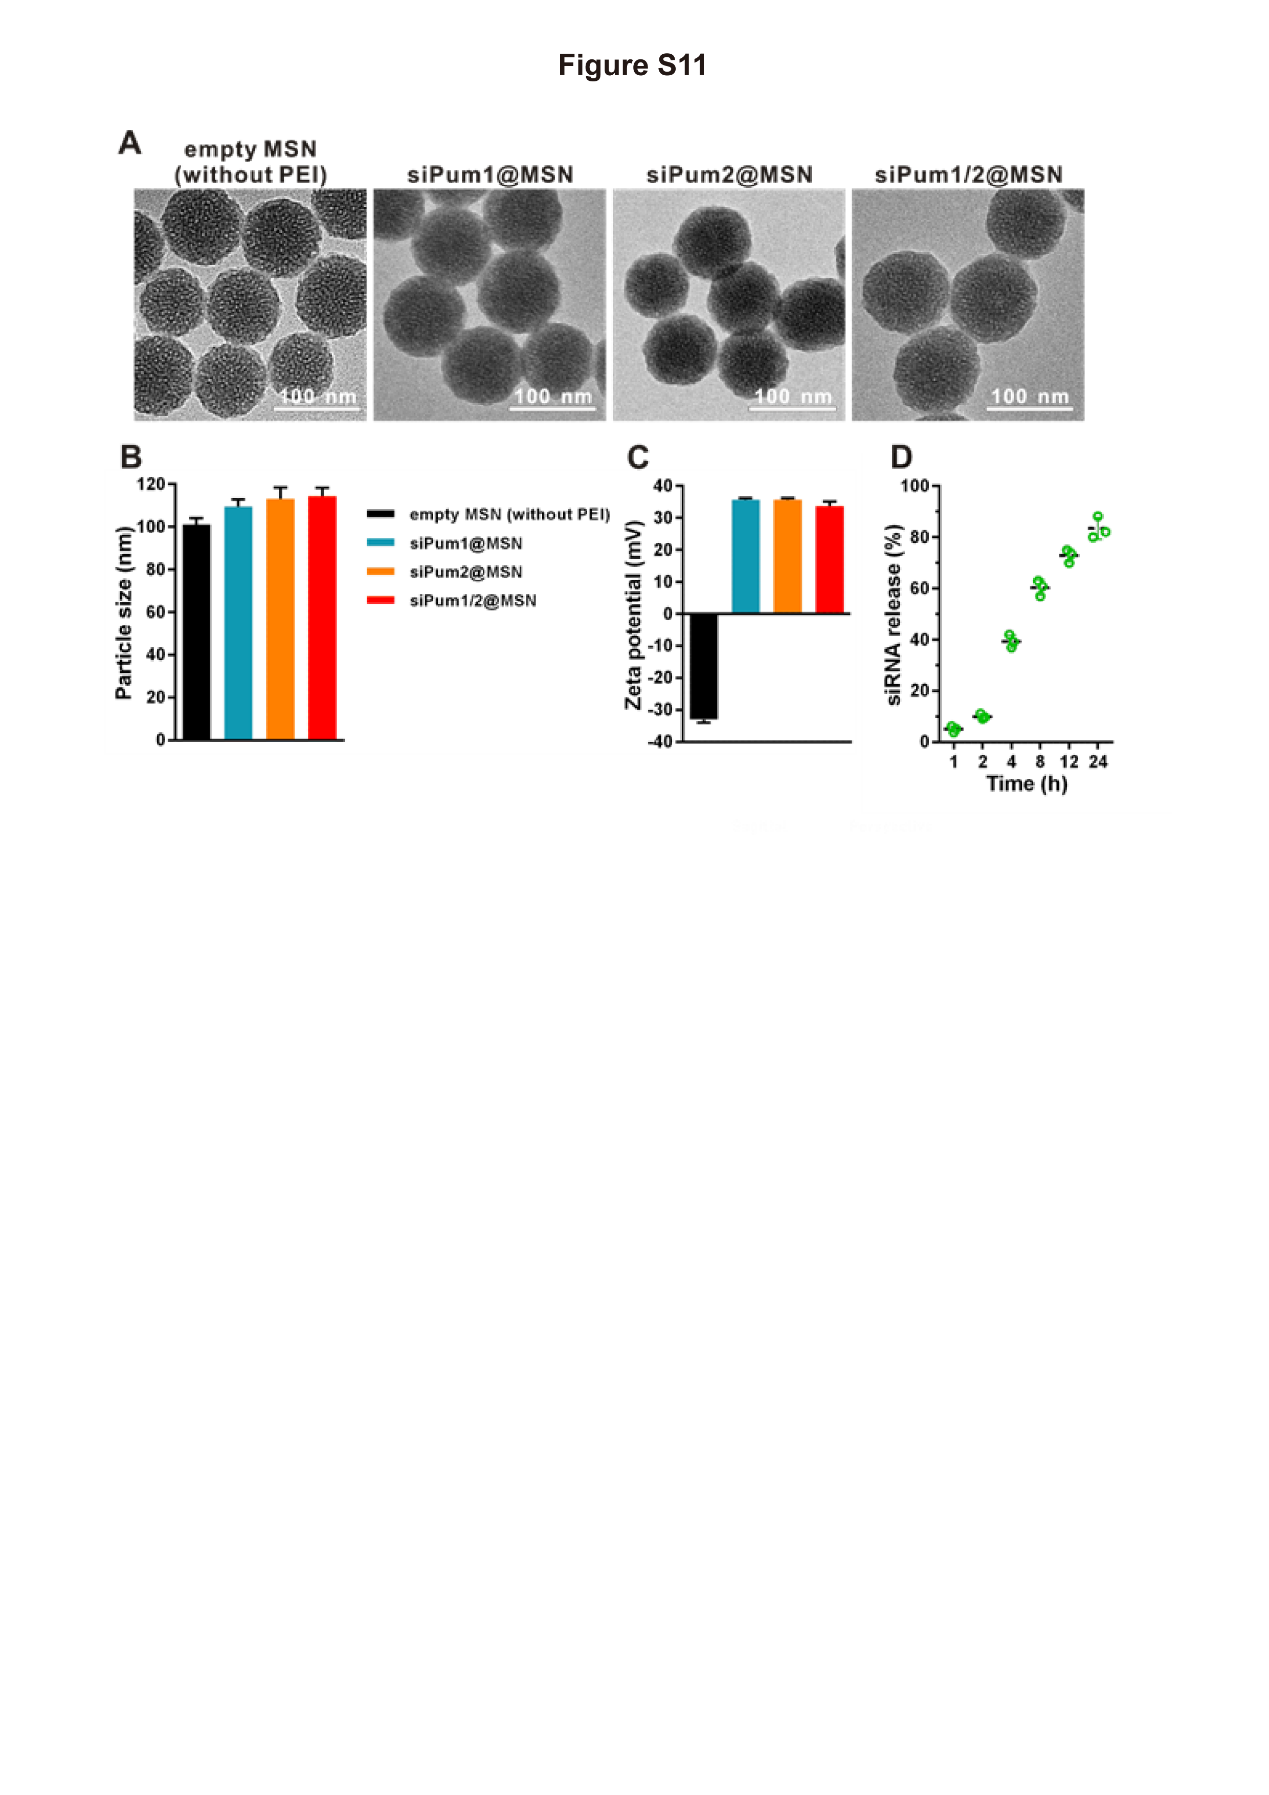


**Figure S13. Characterization of siRNA-loaded MSN**

(A) TEM photos of empty MSN, siPum1@MSN, siPum2@MSN, and siPum1/2@MSN.

(B) Particle size.

(C) Zeta potential.

(D) siRNA release in 5 mM GSH-contained PBS.


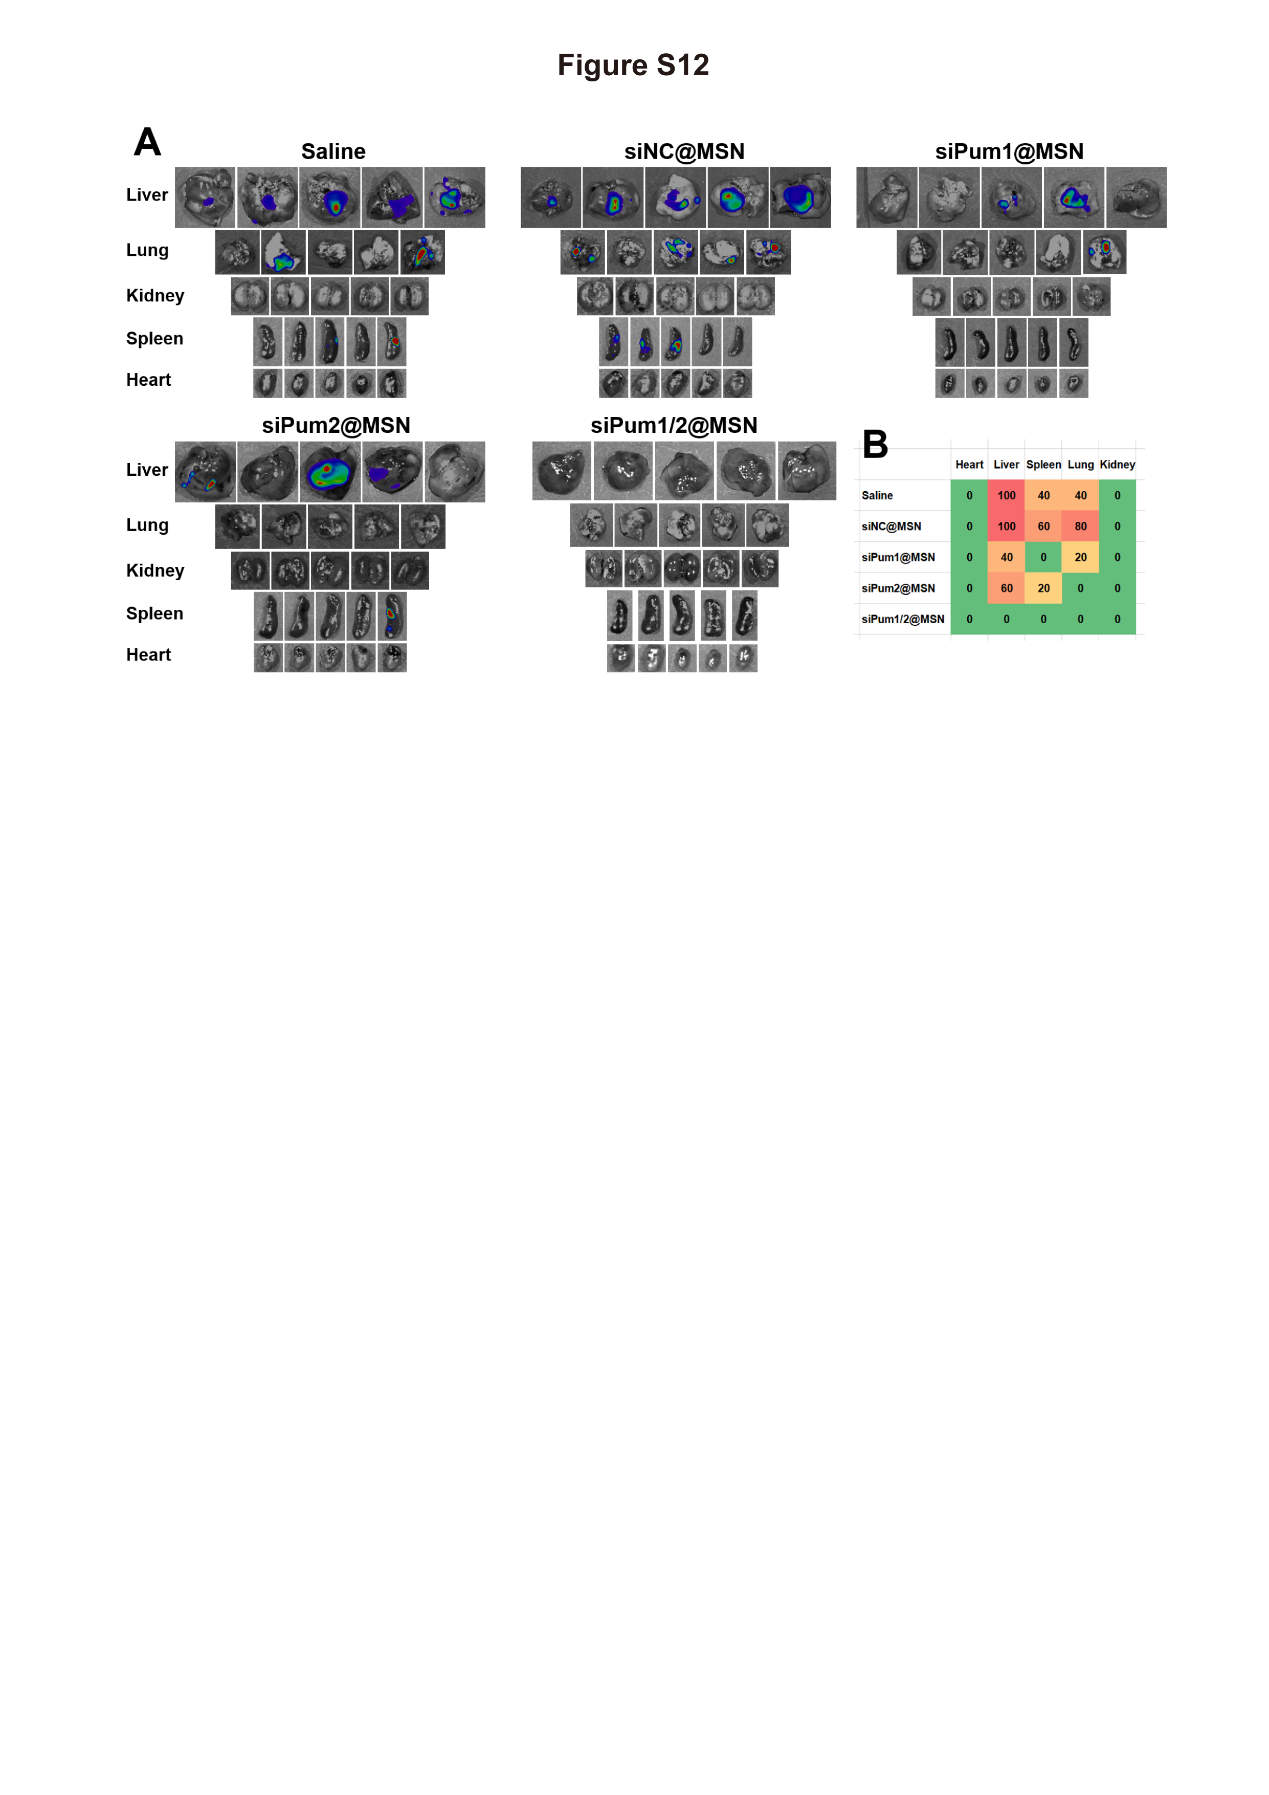


**Figure S14. siPum1/2@MSN reduced metastatic spread of HCT116-luc tumor cells to other main organs in the orthotopic colorectal tumor bearing mice**

(A) On last day (day 30) of the animal study, ex vivo bioluminescence imaging was performed to identify micro-metastasis in main organs (heart, liver, spleen, lung, and kidney).

(B) A heat map for the metastatic frequency (%) under various treatments.


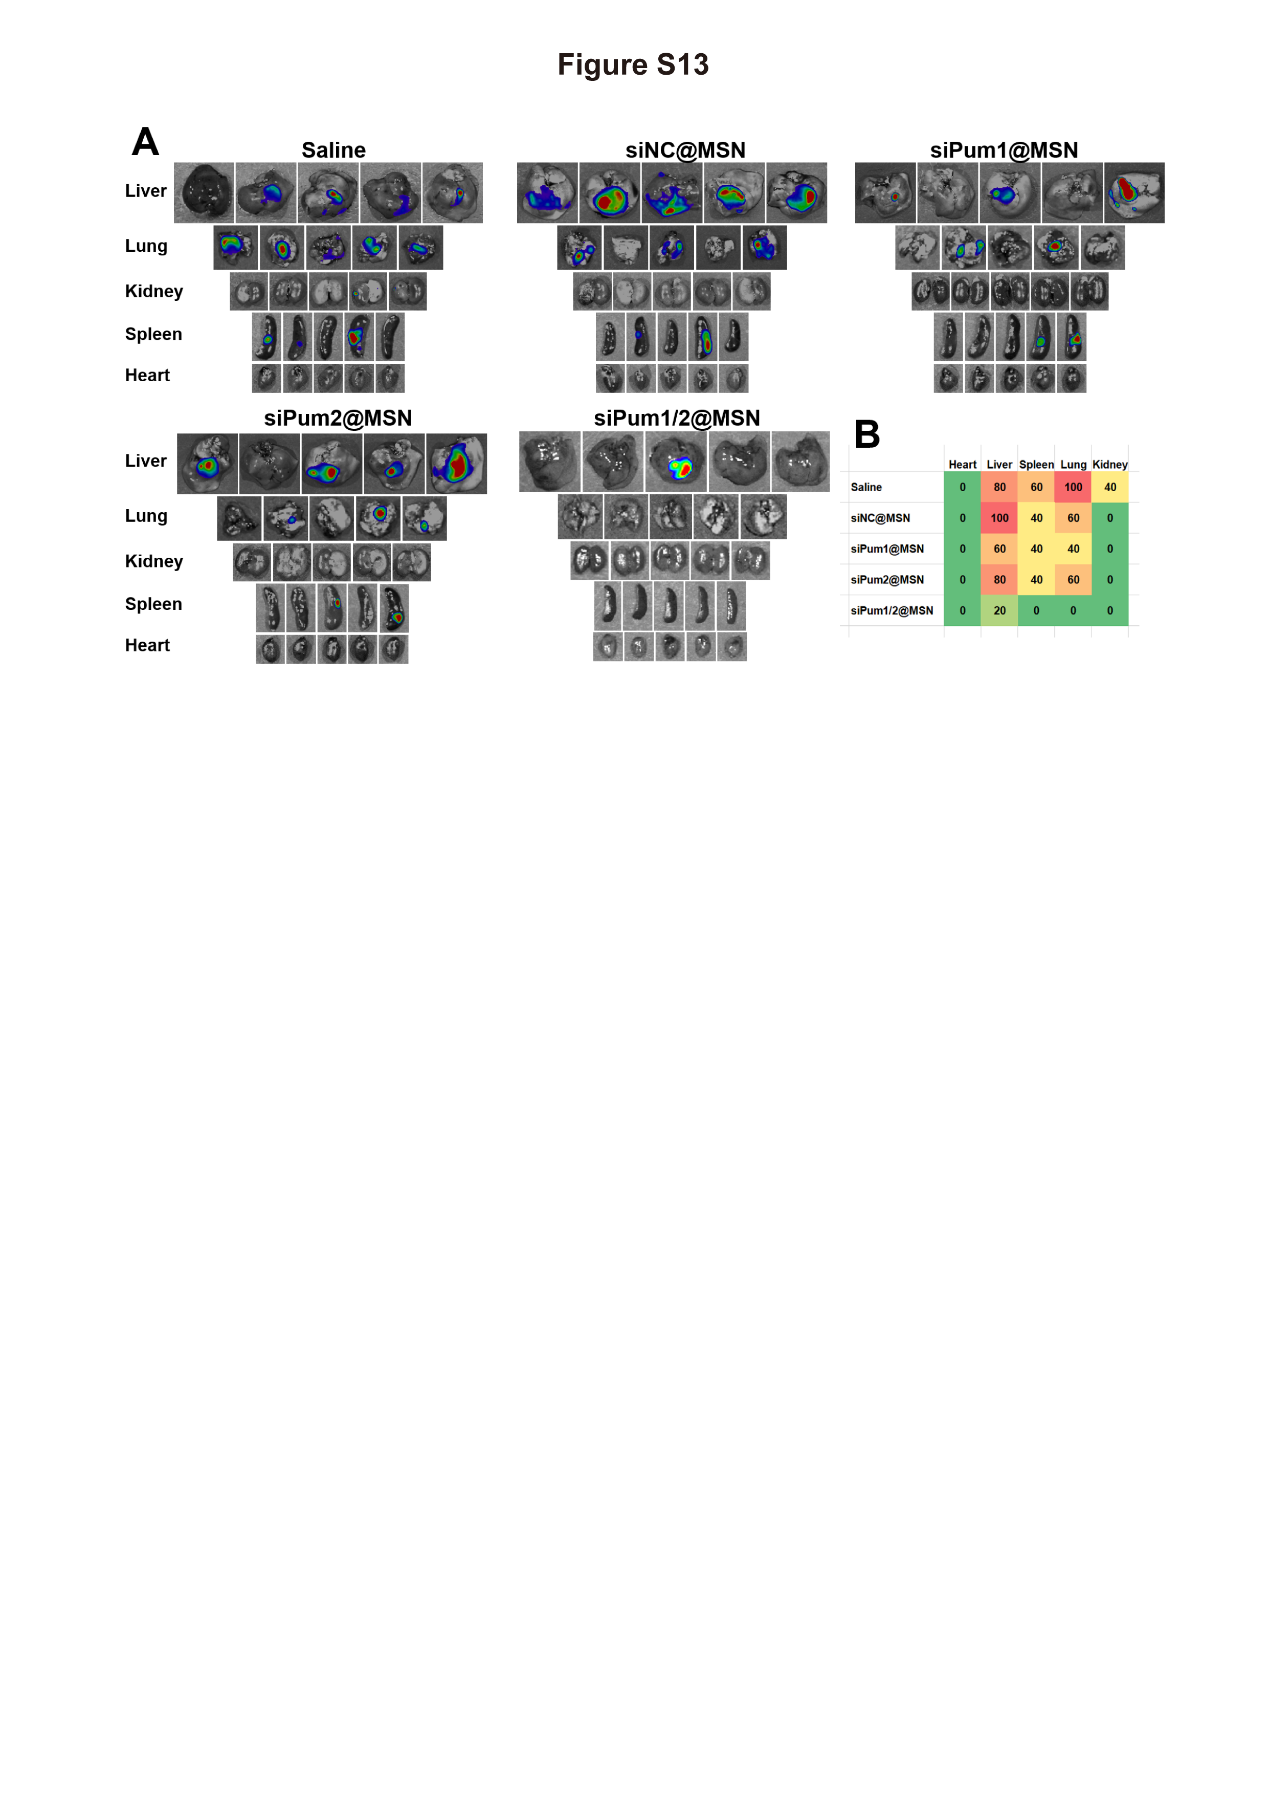


**Figure S15. siPum1/2@MSN reduced metastatic spread of COLO205-luc tumor cells to other main organs in the orthotopic colorectal tumor bearing mice**

(A) On last day (day 30) of the animal study, ex vivo bioluminescence imaging was performed to identify micro-metastasis in main organs (heart, liver, spleen, lung, and kidney).

(B) A heat map for the metastatic frequency (%) under various treatments.

The empty MSN without PEI coating were spherical with a diameter of ~ 90 nm as shown in TEM (Figure S16A). No obvious difference in TEM images appeared after PEI coating and siRNA condensation (Figure S16A).


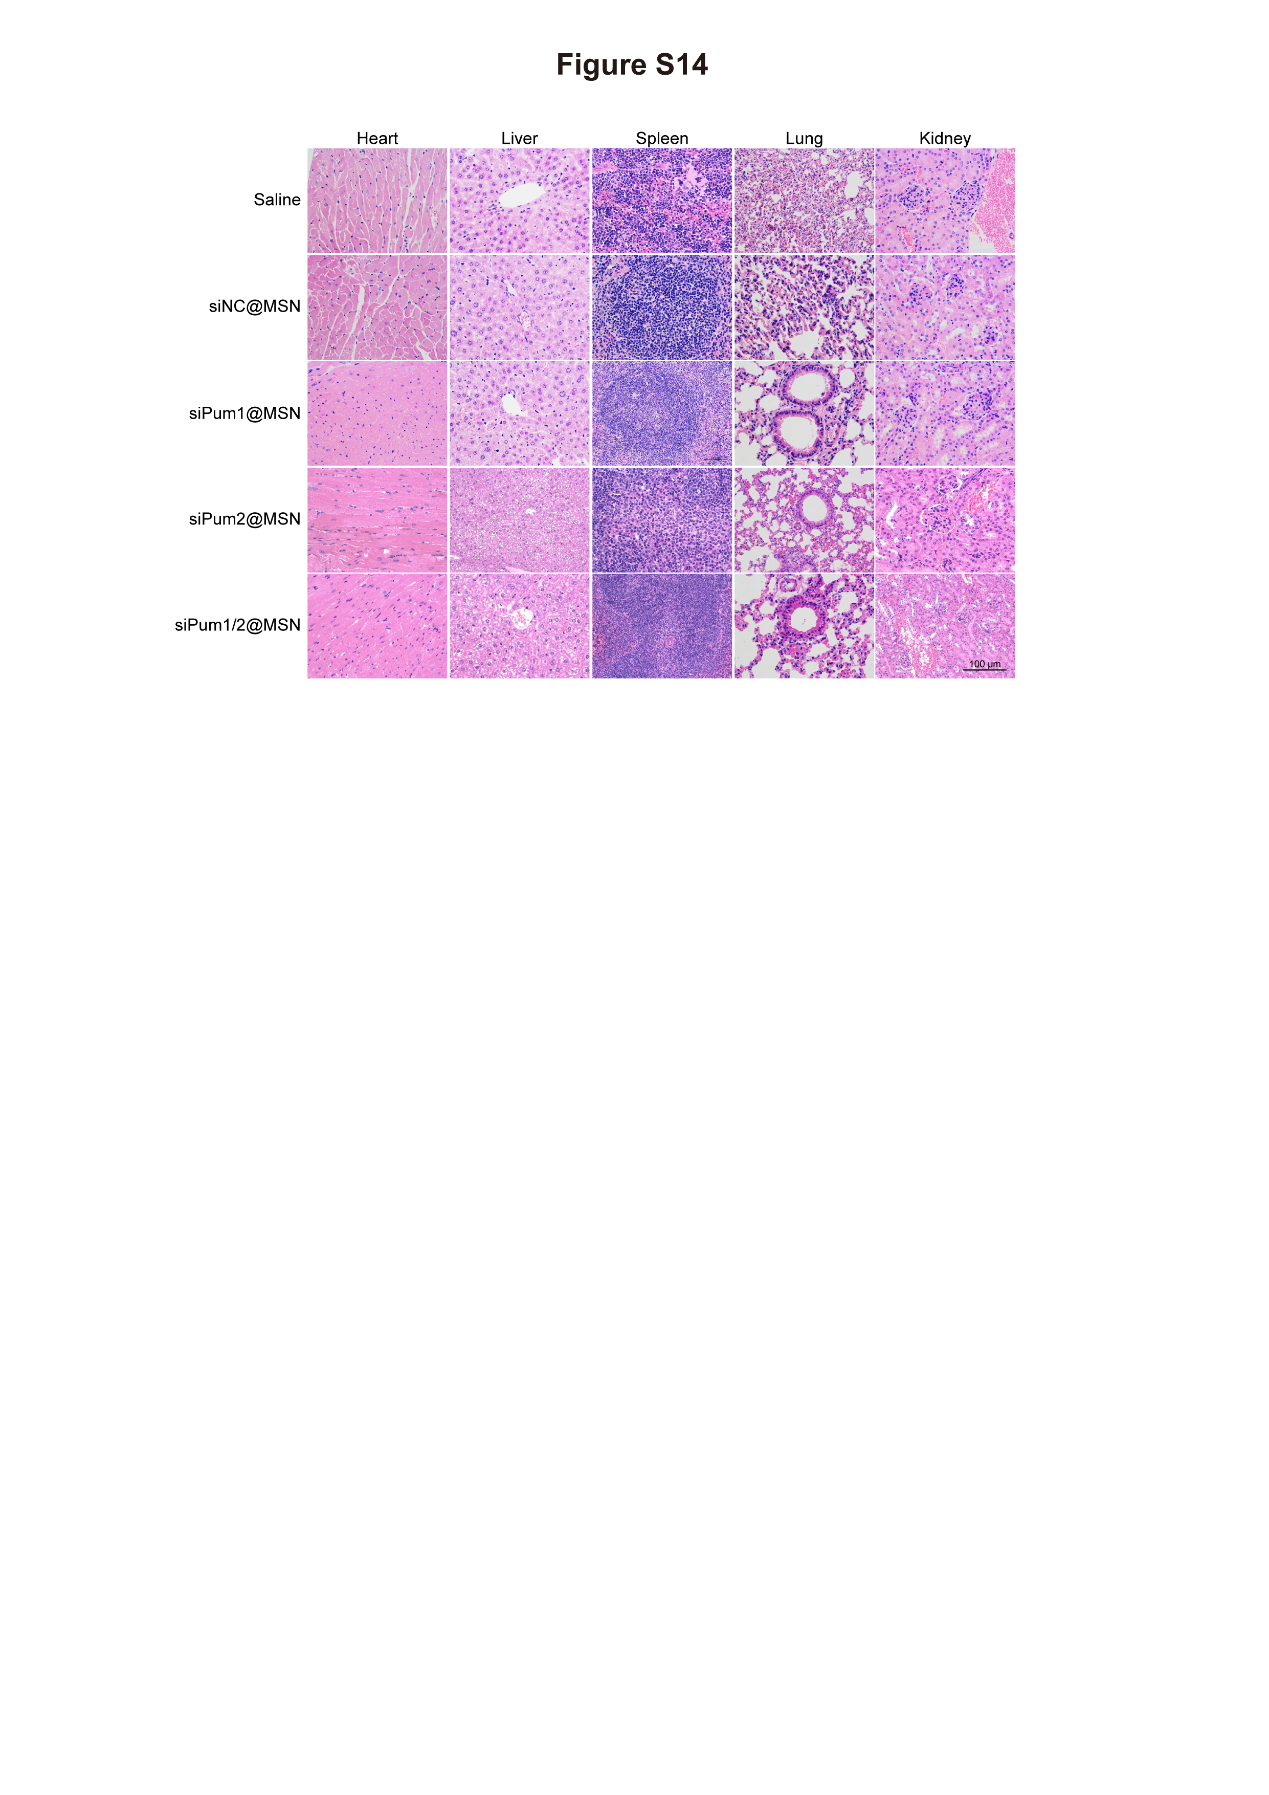


**Figure S16. Organ toxicology testing of siPumilio@MSN in the orthotopic colorectal tumor bearing mice**

Three mice from each group were sacrificed on day 11 (2 d after the last injection of the nanoparticles). The heart, liver, spleen, lung, and kidney were collected for H&E histological assay for toxicity evaluation.
