# Supplementary material for: PUMILIO Proteins in Colorectal Cancer: Tumor Growth Promoting Function and Potential as Therapeutic Targets
Source: Research Square preprint supplement (doi:10.21203/rs.3.rs-199046/v1), 2021-02-11
Supplement: Supplementary file 4 [file 49fb8c4a1b77fa2d2b23e2d3.xlsx]

## Sheet: Sheet1
Table S1. Primers
Name	Primers 5'-3'
PUM1 real time PCR	Forward	GGCATGGAGCCTCTTCAGTT
	Reverse	TCAGCGTCCTCTTACTCCCA
PUM2 real time PCR	Forward	TCAGCGTCCTCTTACTCCCA
	Reverse	CCAACCACTAAGGCACCAGT
p21 real time PCR	Forward	TGTCCGTCAGAACCCATGC
	Reverse	AAAGTCGAAGTTCCATCGCTC
SLC2A1 real time PCR	Forward	GGCCAAGAGTGTGCTAAAGAA
	Reverse	ACAGCGTTGATGCCAGACAG
NPTN real time PCR	Forward	GAGGTCATTATTCGAGACAGCC
	Reverse	TTGATCCTGTACTCCATGTTGC
AREG real time PCR	Forward	GTGGTGCTGTCGCTCTTGATA
	Reverse	CCCCAGAAAATGGTTCACGCT
CEP97 real time PCR	Forward	CCGGAGAAGGATCAGTGGTCA
	Reverse	CCACACCCATCATCCGAAC
CCNB1 real time PCR	Forward	AACTTTCGCCTGAGCCTATTTT
	Reverse	TTGGTCTGACTGCTTGCTCTT
PLK real time PCR	Forward	CACCAGCACGTCGTAGGATTC
	Reverse	CCGTAGGTAGTATCGGGCCTC
KPNA2 real time PCR	Forward	ACATAATCCGGGCTGGTTTGA
	Reverse	GGGAGATGCCAACAGAGAAATG
BUB3 real time PCR	Forward	GGACCCATGATGCCCCTATC
	Reverse	CCCAGCATTACAAGGAGTTCTG
DKK1 real time PCR	Forward	CCTTGAACTCGGTTCTCAATTCC
	Reverse	CAATGGTCTGGTACTTATTCCCG
MTMR10 real time PCR	Forward	GCAAATTGTCACAGTAAACGACC
	Reverse	TGGCTGGGAATAATGAGCTATTG
UPF1 real time PCR	Forward	ACCTATTACACGAAGGACCTCC
	Reverse	ACGTCCGTTGCAGAACCAC
HSP90AA1 real time PCR	Forward	GCTTGACCAATGACTGGGAAG
	Reverse	AGCTCCTCACAGTTATCCATGA
COQ10B real time PCR	Forward	GGACTGGTCATACGGCCTTG
	Reverse	ACCACAGGAAGCTAAATATCTGC
HSP90AB1 real time PCR	Forward	CGAAGTTGGACAGTGGTAAAGAG
	Reverse	TGCCCAATCATGGAGATGTCT
HERC2 real time PCR	Forward	TCGCCTCGACTCCAAATGG
	Reverse	TCTTTGTTCCACTTGGTTCGAC
POLR2B real time PCR	Forward	GCGGATGAGGATATGCAATATGA
	Reverse	ACCAAGCCTTTCTCGTCAAAA
HSP90B1 real time PCR	Forward	CCAGTTTGGTGTCGGTTTCTAT
	Reverse	CTGGGTATCGTTGTTGTGTTTTG
RAB18 real time PCR	Forward	GCACGAAAGCATTCCATGTTATT
	Reverse	CTGTGTGACAGTTTGACTCCTT
siPUM1	Forward	UCACAUGGAAACUCUGACCTT
	Reverse	UAUGCAUGACGAUCUUCCGTT
siPUM2	Forward	AAGCGCUCAACUACUUCAGTT
	Reverse	UCGUGUUACUGUUAUGUCUTT
p21 PREmut PCR	Forward	ACGTTCCCCGAGTTCTTCCT
	Reverse	GAGGAAGTAGCTGGCATGAA
ACTIN real time PCR	Forward	CATGTACGTTGCTATCCAGGC
	Reverse	CTCCTTAATGTCACGCACGAT
GAPDH real time PCR	Forward	TCTTCTCGTGCAGTGCTAGC
	Reverse	TGGTTTCATGACAAGGTAGGGC
PUM1-CDS	Forward	CTAGCTAGCATGAGCGTTGCATGTGTCTTGAAGAGAAAAGC
	Reverse	CCGCTCGAGTCAGATGATACCATTAGGGGGGCCACAGATGG
PUM1 KO PCR	Forward	CAGTGCTTTGGCAGGACTCTTTCAG
	Reverse	CTGATGTTCTGCATGAATGTTATCCCC
PUM2 KO PCR	Forward	CCATTCAATGTCCCAGCCTATTATGG
	Reverse	CAAGTGGCTAAGCAGAAGAATAGC
p21-3' UTR-WT	Forward	AATTCTAGGCGATCGCTCGATCCGCCCACAGGAAGCCT
	Reverse	AAACGAATTCCCGGGCTCGAGAGCACCTGCTGTATATTCAGCAT
p21-3' UTR-PRE-MUT	Forward	ACATCATACCCTGGCCGCCC
	Reverse	TGAGGAGGTGTTTAAATTAAAACAC
U6 real time PCR	Forward	TCGTGAAGCGTTCCATATTTT
	Reverse	QIAGEN universal primer
