# Supplementary material for: PUMILIO Proteins in Colorectal Cancer: Tumor Growth Promoting Function and Potential as Therapeutic Targets
Source: Research Square preprint supplement (doi:10.21203/rs.3.rs-199046/v1), 2021-02-11
Supplement: Supplementary file 5 [file 5805bf728e04354e046fb22b.xlsx]

## Sheet: Sheet1
Table S2. Changed mRNAs in Pum1-/- HCT116 cells
AccID	type_of_gene	Location	Strand	KeggID	Description	log2FC	Pvalue	WT-1	WT-2	Pum1-/--1	Pum1-/--2
TSC22D3	protein-coding	chrx:107713221-107717061	-	hsa:1831	TSC22 domain family, member 3	0.638479	0.0381649	308	372	537	577
RAB6B	protein-coding	chr3:133824235-133885660	-	hsa:51560	RAB6B, member RAS oncogene family	0.769142	0.0148076	242	402	564	570
TSC22D1	protein-coding	chr13:44432143-44576565	-	hsa:8848	TSC22 domain family, member 1	-1.22445	1.52476e-06	7334	9766	4100	3582
LINC00998	ncRNA	chr7:113116718-113118582	-	hsa:401397	long intergenic non-protein coding RNA 998	-1.07947	0.0161379	215	211	152	66
FLNC	protein-coding	chr7:128830429-128859274	+	hsa:2318	filamin C, gamma	0.606584	0.0276335	3462	4079	5385	6690
TMEM63A	protein-coding	chr1:225840556-225882403	-	hsa:9725	transmembrane protein 63A	0.961456	0.0080502	220	256	371	600
C20orf195	protein-coding	chr20:63555349-63556712	+	hsa:79025	chromosome 20 open reading frame 195	1.21593	0.0381452	29	32	60	89
FN3K	protein-coding	chr17:82735576-82751197	+	hsa:64122	fructosamine 3 kinase	-2.81213	5.73003e-05	54	80	13	7
VIM-AS1	ncRNA	chr10:17214239-17229985	-	hsa:100507347	VIM antisense RNA 1	3.92523	0.000157097	3	2	53	29
FAM132B	protein-coding	chr2:238159008-238168890	+	hsa:151176	family with sequence similarity 132, member B	1.25221	0.00058498	107	154	289	357
CHMP6	protein-coding	chr17:80991841-81000133	+	hsa:79643	charged multivesicular body protein 6	0.987877	0.00252037	289	396	586	826
GOLGA2P7	pseudo	chr15:84198848-84230168	-	hsa:388152	golgin A2 pseudogene 7	-1.17901	0.0213856	123	89	55	47
ANKHD1-EIF4EBP3	protein-coding	chr5:140401814-140549578	+	hsa:404734	ANKHD1-EIF4EBP3 readthrough	-0.694808	0.0268735	1389	1724	1304	739
RAB15	protein-coding	chr14:64945814-64972157	-	hsa:376267	RAB15, member RAS oncogene family	1.67372	5.32775e-08	222	244	770	804
RAB18	protein-coding	chr10:27504174-27542237	+	hsa:22931	RAB18, member RAS oncogene family	0.749187	0.035609	436	672	1329	628
RAB19	protein-coding	chr7:140403740-140426881	+	hsa:401409	RAB19, member RAS oncogene family	-1.08567	0.0345616	76	106	52	38
SSH1	protein-coding	chr12:108782694-108857606	-	hsa:54434	slingshot protein phosphatase 1	-0.80205	0.00220662	4998	7218	4053	3273
HYAL3	protein-coding	chr3:50292828-50298862	-	hsa:8372	hyaluronoglucosaminidase 3	1.23847	0.00185703	107	156	240	401
LOC105378678	lncRNA	chr1:41428212-41464911	+		uncharacterized LOC105378678	4.84989	0.0103601	1	0	14	17
MCRIP1	protein-coding	chr17:81822361-81833294	-	hsa:348262	family with sequence similarity 195, member B	-0.67151	0.0409017	781	925	441	681
ARHGEF4	protein-coding	chr2:131034982-131047253	+	hsa:50649	Rho guanine nucleotide exchange factor (GEF) 4	-0.78466	0.0194567	453	431	259	289
ARHGEF2	protein-coding	chr1:155946853-155971063	-	hsa:9181	Rho/Rac guanine nucleotide exchange factor (GEF) 2	0.6116	0.0380361	727	792	1111	1343
CDC42	protein-coding	chr1:22052627-22092943	+	hsa:998	cell division cycle 42	0.607052	0.0340558	484	599	934	806
RAB3B	protein-coding	chr1:51907956-51990764	-	hsa:5865	RAB3B, member RAS oncogene family	1.26904	4.57899e-05	1283	1847	5114	2827
RAB35	protein-coding	chr12:120095094-120116776	-	hsa:11021	RAB35, member RAS oncogene family	0.84918	0.00309429	1567	1915	2823	3750
RAB25	protein-coding	chr1:156061149-156070514	+	hsa:57111	RAB25, member RAS oncogene family	-0.865052	0.00334149	2082	2768	1160	1613
RAB26	protein-coding	chr16:2148650-2154140	+	hsa:25837	RAB26, member RAS oncogene family	-0.921402	0.0161404	246	261	120	163
RAB20	protein-coding	chr13:110523066-110561737	-	hsa:55647	RAB20, member RAS oncogene family	0.787601	0.0127806	283	452	596	714
RAB29	protein-coding	chr1:205767986-205775482	-	hsa:8934	RAB29, member RAS oncogene family	-0.688295	0.0202222	566	849	490	425
TBC1D30	protein-coding	chr12:64824630-64880820	+	hsa:23329	TBC1 domain family, member 30	-0.954364	0.00444949	410	407	243	208
FAM129A	protein-coding	chr1:184791032-184975132	-	hsa:116496	family with sequence similarity 129, member A	1.27724	0.00136404	131	143	474	238
NOP14-AS1	ncRNA	chr4:2935546-2951078	+	hsa:317648	NOP14 antisense RNA 1	0.627399	0.0453473	350	436	564	708
NUDCD2	protein-coding	chr5:163453580-163460137	-	hsa:134492	NudC domain containing 2	-0.623137	0.0439397	411	625	370	330
PALLD	protein-coding	chr4:168497066-168928457	+	hsa:23022	palladin, cytoskeletal associated protein	-8.13167	6.88492e-07	51	45	0	0
PALM3	protein-coding	chr19:14053367-14062136	-	hsa:342979	paralemmin 3	1.69315	6.06989e-05	50	62	193	188
FAM122B	protein-coding	chrx:134769566-134797211	-	hsa:159090	family with sequence similarity 122B	-0.613768	0.0217714	1575	1938	1230	1188
RAB3IL1	protein-coding	chr11:61898382-61920266	-	hsa:5866	RAB3A interacting protein (rabin3)-like 1	0.768811	0.0187179	318	434	552	780
TBC1D19	protein-coding	chr4:26584084-26813878	+	hsa:55296	TBC1 domain family, member 19	-0.968252	0.00431775	291	363	183	169
RELL2	protein-coding	chr5:141636946-141641077	+	hsa:285613	RELT-like 2	0.828213	0.0365873	155	176	227	389
TBC1D16	protein-coding	chr17:79943853-80035875	-	hsa:125058	TBC1 domain family, member 16	-0.822246	0.00260665	1681	2044	1060	1156
PPP3CA	protein-coding	chr4:101023430-101347471	-	hsa:5530	protein phosphatase 3, catalytic subunit, alpha isozyme	-0.850782	0.0308353	2220	2420	2070	708
STC2	protein-coding	chr5:173314723-173329503	-	hsa:8614	stanniocalcin 2	0.760946	0.00633262	615	724	1242	1156
MB21D2	protein-coding	chr3:192796815-192918161	-	hsa:151963	Mab-21 domain containing 2	0.805257	0.00861064	269	355	561	581
MSRB2	protein-coding	chr10:23095564-23119294	+	hsa:22921	methionine sulfoxide reductase B2	1.08494	0.00177387	146	192	337	412
MSRB1	protein-coding	chr16:1938233-1943293	-	hsa:51734	methionine sulfoxide reductase B1	1.04974	0.000828274	690	1042	1481	2218
PNRC1	protein-coding	chr6:89080749-89084840	+	hsa:10957	proline-rich nuclear receptor coactivator 1	-0.721388	0.0130686	824	1354	741	628
LOC202181	pseudo	chr5:177618500-177672277	-	hsa:202181	SUMO-interacting motifs containing 1 pseudogene	1.69023	0.00309422	23	26	83	84
TRIB1	protein-coding	chr8:125430100-125438404	+	hsa:10221	tribbles pseudokinase 1	-1.35934	9.61209e-08	10006	13372	4714	4822
FAM117B	protein-coding	chr2:202635178-202769757	+	hsa:150864	family with sequence similarity 117, member B	-1.56872	0.000126888	352	373	182	81
STX7	protein-coding	chr6:132457524-132513198	-	hsa:8417	syntaxin 7	0.72795	0.0287892	486	627	1271	684
LOC102724895	ncRNA	chr18:70335508-70338180	-	hsa:102724895	uncharacterized LOC102724895	-5.36667	0.00332989	14	26	1	0
FAM110C	protein-coding	chr2:38814-46588	-	hsa:642273	family with sequence similarity 110, member C	-1.34322	0.000284502	222	290	112	100
FUCA1	protein-coding	chr1:23845083-23865966	-	hsa:2517	fucosidase, alpha-L- 1, tissue	0.745832	0.00840576	482	640	987	984
XBP1	protein-coding	chr22:28794560-28800572	-	hsa:7494	X-box binding protein 1	0.624037	0.0184859	2096	2512	3592	3886
LOC102724800	ncRNA	chr21:41768058-41776078	+	hsa:102724800	uncharacterized LOC102724800	7.4928	1.71578e-05	0	0	18	51
TRMT10B	protein-coding	chr9:37753218-37780459	+	hsa:158234	tRNA methyltransferase 10 homolog B (S. cerevisiae)	-1.31512	0.0102919	103	94	45	40
LOC100421028	pseudo	chr17:29197074-29197789	-		gap junction protein, alpha 4, 37kDa pseudogene	-5.44473	0.0218773	4	12	0	0
GPRC5A	protein-coding	chr12:12891022-12913666	+	hsa:9052	G protein-coupled receptor, class C, group 5, member A	1.288	3.22849e-06	7751	8559	18674	23383
LINC00704	ncRNA	chr10:4656156-4662419	+	hsa:100216001	long intergenic non-protein coding RNA 704	5.65554	9.54423e-08	0	3	83	72
SUN2	protein-coding	chr22:38734714-38756019	-	hsa:25777	Sad1 and UNC84 domain containing 2	0.707919	0.0121019	1393	1747	2370	3000
CHPF2	protein-coding	chr7:151232489-151238827	+	hsa:54480	chondroitin polymerizing factor 2	0.860743	0.00597892	423	514	757	1026
BCAM	protein-coding	chr19:44809059-44821421	+	hsa:4059	basal cell adhesion molecule (Lutheran blood group)	1.61045	6.63744e-07	231	296	706	974
LINC00663	ncRNA	chr19:19756371-19776413	-	hsa:284440	long intergenic non-protein coding RNA 663	-2.48502	0.0010069	33	103	7	17
ANKZF1	protein-coding	chr2:219229757-219236651	+	hsa:55139	ankyrin repeat and zinc finger domain containing 1	-0.814175	0.00659379	717	767	442	454
LINC00673	ncRNA	chr17:72403322-72592804	-	hsa:100499467	long intergenic non-protein coding RNA 673	0.690572	0.0124054	696	1023	1438	1449
FAM104A	protein-coding	chr17:73207353-73232394	-	hsa:84923	family with sequence similarity 104, member A	0.636878	0.019122	1001	1534	2189	1912
TINCR	ncRNA	chr19:5558167-5568034	-	hsa:257000	tissue differentiation-inducing non-protein coding RNA	1.8331	2.96621e-07	109	107	392	427
F3	protein-coding	chr1:94529176-94541857	-	hsa:2152	coagulation factor III (thromboplastin, tissue factor)	2.23111	1.60495e-14	436	567	2968	2005
DYNLRB1	protein-coding	chr20:34516384-34540958	+	hsa:83658	dynein, light chain, roadblock-type 1	0.657509	0.0235537	975	1144	1543	1971
LINC00634	ncRNA	chr22:41952187-41958942	+	hsa:339674	long intergenic non-protein coding RNA 634	-2.1837	0.0204553	24	41	12	3
FH	protein-coding	chr1:241497557-241519785	-	hsa:2271	fumarate hydratase	-0.713423	0.0125992	823	1141	698	558
FOSB	protein-coding	chr19:45467995-45475179	+	hsa:2354	FBJ murine osteosarcoma viral oncogene homolog B	-1.42549	5.7933e-08	4433	6570	2321	1952
PP7080	ncRNA	chr5:470510-472965	-	hsa:25845	uncharacterized LOC25845	-0.815852	0.0436238	153	193	94	112
GCHFR	protein-coding	chr15:40764087-40767713	+	hsa:2644	GTP cyclohydrolase I feedback regulator	2.0786	2.21703e-05	34	33	131	169
HR	protein-coding	chr8:22114419-22131053	-	hsa:55806	hair growth associated	2.13786	3.69125e-12	412	575	1844	2663
GPNMB	protein-coding	chr7:23246697-23275110	+	hsa:10457	glycoprotein (transmembrane) nmb	-1.7328	0.0229679	36	49	18	9
FAM102A	protein-coding	chr9:127940582-127950714	-	hsa:399665	family with sequence similarity 102, member A	0.887329	0.00356522	545	830	1126	1502
TMEM59L	protein-coding	chr19:18612872-18621039	+	hsa:25789	transmembrane protein 59-like	2.18504	1.00372e-09	121	142	498	755
CDCA3	protein-coding	chr12:6844798-6852066	-	hsa:83461	cell division cycle associated 3	1.0409	0.00062487	972	1045	1828	2553
TRS-CGA1-1	tRNA	chr17:8138881-8138962	-		transfer RNA-Ser (CGA) 1-1	5.46833	0.0185432	0	0	5	12
TIMP2	protein-coding	chr17:78852977-78925390	-	hsa:7077	TIMP metallopeptidase inhibitor 2	1.47202	1.78322e-08	4265	5533	13345	15105
TIMP3	protein-coding	chr22:32800816-32863041	+	hsa:7078	TIMP metallopeptidase inhibitor 3	2.21604	1.6376e-09	58	93	382	347
SEC61A1	protein-coding	chr3:128052369-128071683	+	hsa:29927	Sec61 alpha 1 subunit (S. cerevisiae)	0.71618	0.00939558	6996	8618	11754	15126
TEAD4	protein-coding	chr12:2959312-3040676	+	hsa:7004	TEA domain family member 4	0.6027	0.0493106	968	1110	1363	1953
RAP1GAP2	protein-coding	chr17:2853541-3037741	+	hsa:23108	RAP1 GTPase activating protein 2	1.59732	0.000751122	49	41	155	138
EHBP1	protein-coding	chr2:62706607-63046483	+	hsa:23301	EH domain binding protein 1	-0.915654	0.0148533	237	337	200	120
LOC102724250	protein-coding	nt_187366.1:4611-41174	-	hsa:102724250	neuroblastoma breakpoint family member 1-like	0.790534	0.0247972	199	355	613	381
SFTA1P	pseudo	chr10:10784439-10794914	-	hsa:207107	surfactant associated 1, pseudogene	-4.48879	0.0323611	15	5	0	1
FPR1	protein-coding	chr19:51745773-51751897	-	hsa:2357	formyl peptide receptor 1	2.74129	0.00607477	6	3	24	41
PAQR8	protein-coding	chr6:52362128-52407777	+	hsa:85315	progestin and adipoQ receptor family member VIII	-1.02109	0.00763885	217	362	184	113
ARHGAP1	protein-coding	chr11:46677077-46697572	-	hsa:392	Rho GTPase activating protein 1	0.719356	0.0152973	1510	1859	2398	3405
ADRB2	protein-coding	chr5:148826593-148828634	+	hsa:154	adrenoceptor beta 2, surface	2.14455	0.0211437	9	6	55	18
TMEM241	protein-coding	chr18:23293372-23437901	-	hsa:85019	transmembrane protein 241	-0.925607	0.00194663	690	997	427	496
TMEM259	protein-coding	chr19:1009651-1021169	-	hsa:91304	transmembrane protein 259	0.609594	0.0421752	1953	2311	2773	4048
TMEM261	protein-coding	chr9:7796490-7799806	-	hsa:90871	transmembrane protein 261	-0.802256	0.01057	534	777	346	434
SWI5	protein-coding	chr9:128276146-128288989	+	hsa:375757	SWI5 recombination repair homolog (yeast)	0.763371	0.0151864	303	348	539	626
WDR66	protein-coding	chr12:121918557-121972069	+	hsa:144406	WD repeat domain 66	1.14477	0.0359105	34	37	95	72
WDR62	protein-coding	chr19:36054881-36105111	+	hsa:284403	WD repeat domain 62	0.881179	0.00257337	811	1041	1543	2021
WDR12	protein-coding	chr2:202880600-202912226	-	hsa:55759	WD repeat domain 12	-0.800881	0.00614092	1450	2135	1292	864
C2orf68	protein-coding	chr2:85605253-85612056	-	hsa:388969	chromosome 2 open reading frame 68	-0.822129	0.00552228	600	774	399	416
WDR35	protein-coding	chr2:19910260-19966811	-	hsa:57539	WD repeat domain 35	-1.58131	0.000288983	158	245	91	50
WDR31	protein-coding	chr9:113313222-113340340	-	hsa:114987	WD repeat domain 31	-0.933779	0.0258497	160	173	110	76
WDR27	protein-coding	chr6:169457212-169702071	-	hsa:253769	WD repeat domain 27	-0.757238	0.0231141	292	375	219	196
FDXACB1	protein-coding	chr11:111874056-111879457	-	hsa:91893	ferredoxin-fold anticodon binding domain containing 1	-0.973746	0.0195579	166	238	83	130
ALDH18A1	protein-coding	chr10:95605929-95656810	-	hsa:5832	aldehyde dehydrogenase 18 family, member A1	-0.813799	0.00177214	4087	5033	2670	2787
CHRM1	protein-coding	chr11:62908679-62921540	-	hsa:1128	cholinergic receptor, muscarinic 1	3.99997	2.91203e-05	0	7	56	55
ALYREF	protein-coding	chr17:81887835-81891622	-	hsa:10189	Aly/REF export factor	0.601079	0.0342686	3264	3977	4920	6590
SLC20A1	protein-coding	chr2:112646577-112663825	+	hsa:6574	solute carrier family 20 (phosphate transporter), member 1	0.686956	0.00706548	3543	4597	6909	6840
HLA-A	protein-coding	chr6:29942470-29945884	+	hsa:3105	major histocompatibility complex, class I, A	0.805279	0.0275734	202	219	310	465
ADRM1	protein-coding	chr20:62302056-62308862	+	hsa:11047	adhesion regulating molecule 1	0.80279	0.00615527	2918	3459	4821	6846
LOC102724124	ncRNA	chrx:16154606-16167463	-	hsa:102724124	uncharacterized LOC102724124	1.71541	0.0398711	9	11	33	36
GPR87	protein-coding	chr3:151294086-151316848	-	hsa:53836	G protein-coupled receptor 87	-2.85545	0.00482342	34	27	2	7
UNC13A	protein-coding	chr19:17601328-17688344	-	hsa:23025	unc-13 homolog A (C. elegans)	-2.13382	5.64296e-14	1098	1524	327	298
UNC13D	protein-coding	chr17:75827225-75844717	-	hsa:201294	unc-13 homolog D (C. elegans)	2.67004	6.22733e-16	235	209	1284	1733
GPR63	protein-coding	chr6:96794125-96837203	-	hsa:81491	G protein-coupled receptor 63	-1.40148	0.00150918	140	180	78	50
GPR55	protein-coding	chr2:230907318-230925412	-	hsa:9290	G protein-coupled receptor 55	5.05071	0.0453446	0	0	8	5
ST20-MTHFS	protein-coding	chr15:79843547-79923106	-	hsa:100528021	ST20-MTHFS readthrough	0.84075	0.0415434	76	97	173	153
GPR15	protein-coding	chr3:98531899-98534679	+	hsa:2838	G protein-coupled receptor 15	-6.57651	0.000700471	9	26	0	0
NECAP2	protein-coding	chr1:16440724-16460078	+	hsa:55707	NECAP endocytosis associated 2	0.658092	0.0249862	945	1187	1510	2009
SLC22A17	protein-coding	chr14:23346304-23354986	-	hsa:51310	solute carrier family 22, member 17	1.02106	0.031314	56	63	106	148
BEX2	protein-coding	chrx:103309346-103310955	-	hsa:84707	brain expressed X-linked 2	-1.43366	0.000210788	185	280	91	88
TRIP6	protein-coding	chr7:100867328-100873454	+	hsa:7205	thyroid hormone receptor interactor 6	0.756361	0.0139693	591	759	993	1387
C11orf24	protein-coding	chr11:68261340-68271965	-	hsa:53838	chromosome 11 open reading frame 24	0.603639	0.0382048	697	863	1112	1373
TRIM6	protein-coding	chr11:5590965-5685095	-	hsa:117854	tripartite motif containing 6	1.04929	0.0134471	62	141	242	187
C11orf45	protein-coding	chr11:128899565-128909520	-	hsa:219833	chromosome 11 open reading frame 45	2.15868	8.52021e-05	16	31	107	109
SPICE1	protein-coding	chr3:113444636-113514842	-	hsa:152185	spindle and centriole associated protein 1	-0.834895	0.0391215	214	227	169	96
PPP1R1A	protein-coding	chr12:54579240-54588659	-	hsa:5502	protein phosphatase 1, regulatory (inhibitor) subunit 1A	2.34464	0.0111261	9	4	28	44
PPP1R3G	protein-coding	chr6:5085486-5087221	+	hsa:648791	protein phosphatase 1, regulatory subunit 3G	4.32997	0.000835807	0	3	23	37
ANGPT2	protein-coding	chr8:6499651-6563263	-	hsa:285	angiopoietin 2	1.37093	0.0404355	29	15	60	65
ANGPT4	protein-coding	chr20:871243-916367	-	hsa:51378	angiopoietin 4	-5.41647	0.0238926	10	4	0	0
SETDB1	protein-coding	chr1:150926339-150964744	+	hsa:9869	SET domain, bifurcated 1	-0.786115	0.0043261	1094	1356	765	731
LOC344065	pseudo	chr2:95214332-95215609	+		zinc finger protein 184 pseudogene	5.60674	0.0121871	0	0	10	9
FSD1	protein-coding	chr19:4304594-4323846	+	hsa:79187	fibronectin type III and SPRY domain containing 1	0.71364	0.0280911	337	439	553	774
SORD2P	ncRNA	chr15:44825499-44847563	-		sorbitol dehydrogenase 2, pseudogene	-1.15301	0.0430543	48	131	41	40
SORBS3	protein-coding	chr8:22566024-22575495	+	hsa:10174	sorbin and SH3 domain containing 3	1.03198	0.000393257	1411	1825	2905	3999
SORBS1	protein-coding	chr10:95311773-95561373	-	hsa:10580	sorbin and SH3 domain containing 1	2.00798	7.94983e-09	193	290	1338	704
LOC442113	pseudo	chr4:82580120-82581695	-		protein tyrosine phosphatase, non-receptor type 11 pseudogene	-5.43061	0.0214426	7	8	0	0
SYNM	protein-coding	chr15:99105069-99136586	+	hsa:23336	synemin, intermediate filament protein	1.85895	0.00346949	28	18	129	55
SYNC	protein-coding	chr1:32679906-32702760	-	hsa:81493	syncoilin, intermediate filament protein	1.63337	0.00111858	26	53	137	115
TRL-AAG2-1	tRNA	chr5:181187701-181187782	+		transfer RNA-Leu (AAG) 2-1	-5.90935	0.00631758	13	7	0	0
NOSTRIN	protein-coding	chr2:168802639-168863851	+	hsa:115677	nitric oxide synthase trafficking	3.15848	0.00949634	2	3	14	32
ZFAND2A	protein-coding	chr7:1148850-1160219	-	hsa:90637	zinc finger, AN1-type domain 2A	1.04327	0.000726065	226	300	604	534
ICAM5	protein-coding	chr19:10289979-10296778	+	hsa:7087	intercellular adhesion molecule 5, telencephalin	-1.29406	0.000154689	391	396	171	171
ICAM3	protein-coding	chr19:10333776-10339834	-	hsa:3385	intercellular adhesion molecule 3	0.785263	0.040191	275	223	359	561
ICAM1	protein-coding	chr19:10270841-10286615	+	hsa:3383	intercellular adhesion molecule 1	1.627	2.04812e-08	332	405	1139	1254
SRRM3	protein-coding	chr7:76201893-76287292	+	hsa:222183	serine/arginine repetitive matrix 3	0.740765	0.0393269	307	310	419	671
LOC285074	pseudo	chr2:87030675-87076413	-	hsa:285074	anaphase promoting complex subunit 1 pseudogene	-1.30948	0.00129033	154	304	94	95
LOC102724351	ncRNA	chr10:103937647-103967045	-	hsa:102724351	uncharacterized LOC102724351	-1.75078	0.0265566	35	41	15	9
PARP8	protein-coding	chr5:50666403-50846520	+	hsa:79668	poly (ADP-ribose) polymerase family, member 8	-0.667639	0.041353	368	460	319	232
PARP1	protein-coding	chr1:226360691-226408100	-	hsa:142	poly (ADP-ribose) polymerase 1	-0.714388	0.00855192	5993	7849	5224	3675
PARP3	protein-coding	chr3:51942290-51948862	+	hsa:10039	poly (ADP-ribose) polymerase family, member 3	0.740667	0.0197808	347	433	587	777
CDH15	protein-coding	chr16:89171755-89195492	+	hsa:1013	cadherin 15, type 1, M-cadherin (myotubule)	1.74699	3.74385e-05	54	65	184	235
PARVA	protein-coding	chr11:12377479-12535356	+	hsa:55742	parvin, alpha	1.33646	5.40148e-07	1166	1334	3315	3360
TMEM104	protein-coding	chr17:74776483-74839783	+	hsa:54868	transmembrane protein 104	1.14907	0.000520927	499	570	956	1531
JMJD1C-AS1	ncRNA	chr10:63465229-63466563	+	hsa:84989	JMJD1C antisense RNA 1	1.52502	0.0225752	23	16	52	69
TMEM139	protein-coding	chr7:143284899-143288049	+	hsa:135932	transmembrane protein 139	1.46942	0.000101895	96	133	275	384
TMEM136	protein-coding	chr11:120325129-120333679	+	hsa:219902	transmembrane protein 136	-0.703193	0.0444325	225	327	189	165
HCFC2	protein-coding	chr12:104064458-104098352	+	hsa:29915	host cell factor C2	1.16152	0.00644388	82	84	246	152
TMEM144	protein-coding	chr4:158210454-158255287	+	hsa:55314	transmembrane protein 144	-0.940321	0.0394639	119	145	91	55
TGFB1I1	protein-coding	chr16:31472208-31477960	+	hsa:7041	transforming growth factor beta 1 induced transcript 1	2.09464	2.15164e-09	163	220	649	1049
MFSD7	protein-coding	chr4:681824-689441	-	hsa:84179	major facilitator superfamily domain containing 7	1.84657	0.0172459	7	18	39	52
GLT8D2	protein-coding	chr12:103988983-104064177	-	hsa:83468	glycosyltransferase 8 domain containing 2	1.11096	0.0160264	52	98	215	121
ARHGDIA	protein-coding	chr17:81867719-81871406	-	hsa:396	Rho GDP dissociation inhibitor (GDI) alpha	0.598961	0.0439785	10445	12700	14650	22019
KARS	protein-coding	chr16:75627724-75647687	-	hsa:3735	lysyl-tRNA synthetase	-0.630276	0.0135118	5380	6783	4180	4082
KAT5	protein-coding	chr11:65712253-65719604	+	hsa:10524	K(lysine) acetyltransferase 5	0.625062	0.0356345	1615	1549	2310	2890
TMEM173	protein-coding	chr5:139475531-139482720	-	hsa:340061	transmembrane protein 173	1.13601	0.000647911	307	402	644	978
TMEM171	protein-coding	chr5:73120561-73131817	+	hsa:134285	transmembrane protein 171	1.21966	0.00523961	50	117	196	199
LTA4H	protein-coding	chr12:96000753-96035661	-	hsa:4048	leukotriene A4 hydrolase	-0.997745	0.000191157	2801	4050	1997	1591
MTSS1L	protein-coding	chr16:70661204-70686207	-	hsa:92154	metastasis suppressor 1-like	0.648537	0.0348461	925	1065	1344	1933
TMEM187	protein-coding	chrx:153980288-153983194	+	hsa:8269	transmembrane protein 187	-1.7573	0.00935844	52	106	11	36
CHST4	protein-coding	chr16:71526251-71538590	+	hsa:10164	carbohydrate (N-acetylglucosamine 6-O) sulfotransferase 4	-6.55948	0.000689076	11	23	0	0
CHST1	protein-coding	chr11:45648871-45665656	-	hsa:8534	carbohydrate (keratan sulfate Gal-6) sulfotransferase 1	2.45113	0.000284686	9	15	65	71
DUSP6	protein-coding	chr12:89347825-89352859	-	hsa:1848	dual specificity phosphatase 6	0.91892	0.00037801	2948	3864	7443	6106
DUSP1	protein-coding	chr5:172768090-172771200	-	hsa:1843	dual specificity phosphatase 1	-1.02984	0.00011001	2251	3156	1352	1410
DUSP2	protein-coding	chr2:96143166-96145468	-	hsa:1844	dual specificity phosphatase 2	-1.25387	0.000708413	234	296	108	125
SLC23A2	protein-coding	chr20:4852357-4901769	-	hsa:9962	solute carrier family 23 (ascorbic acid transporter), member 2	-0.638676	0.0258755	682	922	570	510
PARM1	protein-coding	chr4:74933075-75050115	+	hsa:25849	prostate androgen-regulated mucin-like protein 1	-1.47606	0.00502614	85	103	32	39
PLXNA1	protein-coding	chr3:126988594-127037392	+	hsa:5361	plexin A1	1.44871	4.60807e-07	1166	1511	3264	4363
PLXNA3	protein-coding	chrx:154458287-154472602	+	hsa:55558	plexin A3	0.873355	0.00240863	575	750	1163	1375
TNFAIP8L3	protein-coding	chr15:51056596-51077693	-	hsa:388121	tumor necrosis factor, alpha-induced protein 8-like 3	1.99978	0.0023563	25	12	67	95
GLIS3	protein-coding	chr9:3824127-4300080	-	hsa:169792	GLIS family zinc finger 3	4.39011	7.30398e-37	56	50	1393	994
LOC101929333	ncRNA	chr15:74478068-74490286	-	hsa:101929333	uncharacterized LOC101929333	1.33143	0.0110247	28	46	97	96
PLXNB3	protein-coding	chrx:153764196-153779346	+	hsa:5365	plexin B3	1.74258	0.00897557	15	23	46	85
PCDHB9	protein-coding	chr5:141187127-141191538	+	hsa:56127	protocadherin beta 9	5.59664	0.0127708	0	0	12	7
KRT8P3	pseudo	chr8:61578144-61579915	+		keratin 8 pseudogene 3	0.7218	0.0155436	496	714	925	1147
PDZD11	protein-coding	chrx:70286595-70290040	-	hsa:51248	PDZ domain containing 11	0.655681	0.0255462	695	851	1129	1425
ANKRD1	protein-coding	chr10:90912100-90921275	-	hsa:27063	ankyrin repeat domain 1 (cardiac muscle)	5.99001	1.8673e-13	3	2	220	120
ACVRL1	protein-coding	chr12:51906913-51923361	+	hsa:94	activin A receptor type II-like 1	2.96529	1.50948e-07	25	11	152	157
FUT8	protein-coding	chr14:65646520-65744122	+	hsa:2530	fucosyltransferase 8 (alpha (1,6) fucosyltransferase)	1.44244	0.000723776	48	82	195	171
PHYHIP	protein-coding	chr8:22219705-22232133	-	hsa:9796	phytanoyl-CoA 2-hydroxylase interacting protein	1.06173	0.0239782	61	67	111	170
ANGEL1	protein-coding	chr14:76786473-76812947	-	hsa:23357	angel homolog 1 (Drosophila)	-0.728418	0.0166745	1227	1701	760	1075
ENPP7P8	pseudo	chr11:71722143-71780314	+		ectonucleotide pyrophosphatase/phosphodiesterase 7 pseudogene 8	4.61274	0.0205779	1	0	21	6
RBBP8NL	protein-coding	chr20:62410237-62427573	-	hsa:140893	RBBP8 N-terminal like	-6.31231	0.00174064	8	21	0	0
TUBB2A	protein-coding	chr6:3153666-3157549	-	hsa:7280	tubulin, beta 2A class IIa	1.34071	2.85213e-06	669	756	1740	2068
TUBB2B	protein-coding	chr6:3224261-3227734	-	hsa:347733	tubulin, beta 2B class IIb	1.25803	0.00119778	137	136	273	418
SNHG1	ncRNA	chr11:62851988-62855888	-	hsa:23642	small nucleolar RNA host gene 1 (non-protein coding)	-0.616738	0.0241527	1622	2051	1185	1327
TUBB4A	protein-coding	chr19:6494319-6502584	-	hsa:10382	tubulin, beta 4A class IVa	0.889507	0.00774719	533	788	950	1574
TUBB4B	protein-coding	chr9:137241259-137243707	+	hsa:10383	tubulin, beta 4B class IVb	0.749604	0.00680339	17697	20260	29400	37801
PAXIP1-AS1	ncRNA	chr7:155003433-155005703	+	hsa:202781	PAXIP1 antisense RNA 1 (head to head)	-1.12005	0.0135186	136	136	60	73
GCNT3	protein-coding	chr15:59611783-59620011	+	hsa:9245	glucosaminyl (N-acetyl) transferase 3, mucin type	-2.73668	0.0033965	27	43	8	3
GCNT1	protein-coding	chr9:76500633-76507416	+	hsa:2650	glucosaminyl (N-acetyl) transferase 1, core 2	-0.949616	0.0232337	156	202	122	74
LTBP2	protein-coding	chr14:74498183-74612239	-	hsa:4053	latent transforming growth factor beta binding protein 2	2.32615	1.59479e-09	55	63	347	280
LTBP3	protein-coding	chr11:65538559-65558382	-	hsa:4054	latent transforming growth factor beta binding protein 3	0.837509	0.00556758	1926	2079	3094	4456
LOC101930275	ncRNA	chr8:17801344-17822430	+	hsa:101930275	uncharacterized LOC101930275	-1.37474	0.00243416	135	140	60	53
TGFB2-OT1	lncRNA	chr1:218442626-218443995	+		TGFB2 overlapping transcript 1	5.43468	0.0193841	0	0	11	6
TRNP1	protein-coding	chr1:26993663-27000891	+	hsa:388610	TMF1-regulated nuclear protein 1	-0.607491	0.0406614	1121	1153	729	856
OSGIN1	protein-coding	chr16:83953222-83966332	+	hsa:29948	oxidative stress induced growth inhibitor 1	1.37118	1.51606e-05	360	489	938	1345
CDIP1	protein-coding	chr16:4510675-4538815	-	hsa:29965	cell death-inducing p53 target 1	1.44463	0.044693	29	12	45	78
LINGO1	protein-coding	chr15:77613024-77819524	-	hsa:84894	leucine rich repeat and Ig domain containing 1	0.811163	0.0122987	422	467	680	963
OPN3	protein-coding	chr1:241593150-241640399	-	hsa:23596	opsin 3	-1.17371	0.0183365	87	110	50	42
TUBAL3	protein-coding	chr10:5393098-5404830	-	hsa:79861	tubulin, alpha-like 3	-5.12042	0.0429246	6	6	0	0
CHMP1A	protein-coding	chr16:89647338-89657673	-	hsa:5119	charged multivesicular body protein 1A	0.61008	0.03803	3977	4980	5820	8461
FASTKD1	protein-coding	chr2:169527945-169573916	-	hsa:79675	FAST kinase domains 1	-0.719723	0.0413671	269	394	254	168
ZFYVE21	protein-coding	chr14:103715744-103733668	+	hsa:79038	zinc finger, FYVE domain containing 21	1.0821	9.13688e-05	618	764	1500	1576
TBC1D2	protein-coding	chr9:98198998-98255721	-	hsa:55357	TBC1 domain family, member 2	1.25928	7.86643e-05	390	385	861	1110
OPTN	protein-coding	chr10:13100082-13138276	+	hsa:10133	optineurin	1.69953	0.0182517	10	21	64	40
TUBA1A	protein-coding	chr12:49184795-49189324	-	hsa:7846	tubulin, alpha 1a	0.987332	0.000350114	3624	3949	7184	8693
TUBA1C	protein-coding	chr12:49227926-49273338	+	hsa:84790	tubulin, alpha 1c	0.652929	0.0228039	22342	25653	33230	46115
TMPO-AS1	ncRNA	chr12:98512973-98516226	-	hsa:100128191	TMPO antisense RNA 1	0.864673	0.0194379	123	204	267	346
LOC101929541	lncRNA	chr1:212225278-212285021	-	hsa:101929541	uncharacterized LOC101929541	6.17889	0.00225077	0	0	11	17
PHLDA3	protein-coding	chr1:201464284-201469171	-	hsa:23612	pleckstrin homology-like domain, family A, member 3	0.981619	0.00134408	459	592	927	1240
LOC101929575	ncRNA	chr20:20254830-20267834	-	hsa:101929575	uncharacterized LOC101929575	2.84471	0.00139906	5	6	55	29
CNTNAP2	protein-coding	chr7:146116361-148420998	+	hsa:26047	contactin associated protein-like 2	-5.34398	0.0492138	0	16	0	0
PLEKHD1	protein-coding	chr14:69484754-69528498	+	hsa:400224	pleckstrin homology domain containing, family D (with coiled-coil domains) member 1	2.16113	2.35719e-05	25	28	134	117
KDSR	protein-coding	chr18:63327736-63367240	-	hsa:2531	3-ketodihydrosphingosine reductase	-0.618571	0.0308823	863	1001	705	582
LOXL4	protein-coding	chr10:98247690-98268221	-	hsa:84171	lysyl oxidase-like 4	3.05737	4.08102e-16	43	67	417	531
LOXL1	protein-coding	chr15:73926451-73952137	+	hsa:4016	lysyl oxidase-like 1	0.818358	0.0278591	139	140	248	275
LOXL2	protein-coding	chr8:23296897-23404209	-	hsa:4017	lysyl oxidase-like 2	1.15502	3.87036e-05	759	844	1792	1983
PLEKHA6	protein-coding	chr1:204218853-204307438	-	hsa:22874	pleckstrin homology domain containing, family A member 6	1.17619	9.38454e-05	381	383	934	907
CROCCP2	pseudo	chr1:16618256-16630906	-	hsa:84809	ciliary rootlet coiled-coil, rootletin pseudogene 2	-0.865233	0.0377869	163	162	91	99
GOLGA2P10	miscRNA	chr15:82471477-82513999	-	hsa:80154	golgin A2 pseudogene 10	-1.26786	0.0185412	87	85	34	42
FLRT3	protein-coding	chr20:14323993-14337667	-	hsa:23767	fibronectin leucine rich transmembrane protein 3	-5.99492	0.00455545	11	11	0	0
ACVR2B	protein-coding	chr3:38457152-38493142	+	hsa:93	activin A receptor, type IIB	-0.870386	0.0212024	695	949	676	278
ST6GALNAC2	protein-coding	chr17:76565379-76586066	-	hsa:10610	ST6 (alpha-N-acetyl-neuraminyl-2,3-beta-galactosyl-1,3)-N-acetylgalactosaminide alpha-2,6-sialyltransferase 2	0.717005	0.0416416	144	214	285	326
AIFM2	protein-coding	chr10:70112267-70132934	-	hsa:84883	apoptosis-inducing factor, mitochondrion-associated, 2	1.14239	0.000146267	825	823	1703	2162
DHRS1	protein-coding	chr14:24290598-24299833	-	hsa:115817	dehydrogenase/reductase (SDR family) member 1	-0.838256	0.0340763	180	285	110	158
DHRS2	protein-coding	chr14:23636364-23645639	+	hsa:10202	dehydrogenase/reductase (SDR family) member 2	1.3927	1.49222e-05	313	332	767	1023
ARL6IP1	protein-coding	chr16:18791667-18801370	-	hsa:23204	ADP-ribosylation factor-like 6 interacting protein 1	0.606302	0.0225769	5935	9851	13085	11772
POU2F1	protein-coding	chr1:167220886-167427345	+	hsa:5451	POU class 2 homeobox 1	-0.776781	0.0450628	882	1232	953	356
XKR8	protein-coding	chr1:27959462-27968093	+	hsa:55113	XK, Kell blood group complex subunit-related family, member 8	0.668957	0.0373314	313	361	500	628
ADRA1B	protein-coding	chr5:159916836-159989205	+	hsa:147	adrenoceptor alpha 1B	5.22677	1.59301e-06	1	2	58	59
SLC27A5	protein-coding	chr19:58498333-58511994	-	hsa:10998	solute carrier family 27 (fatty acid transporter), member 5	-1.17693	0.0138095	143	131	50	79
ADRA2B	protein-coding	chr2:96112875-96116245	-	hsa:151	adrenoceptor alpha 2B	1.66898	0.0179856	27	12	48	88
TRPV1	protein-coding	chr17:3565446-3592877	-	hsa:7442	transient receptor potential cation channel, subfamily V, member 1	-1.19011	0.0069519	126	159	61	70
TRX-CAT1-3	tRNA	chr6:26313124-26313195	-		transfer RNA-iMet (CAT) 1-3	-5.34282	0.0264287	7	7	0	0
ORC5	protein-coding	chr7:104126341-104208041	-	hsa:5001	origin recognition complex, subunit 5	-0.647071	0.0383129	501	821	502	375
ORC2	protein-coding	chr2:200913339-200963703	-	hsa:4999	origin recognition complex, subunit 2	-0.64167	0.0480135	729	933	717	412
SEPT3	protein-coding	chr22:41976927-41998221	+	hsa:55964	septin 3	0.661059	0.0225069	505	687	921	1046
SEPT4	protein-coding	chr17:58520255-58532070	-	hsa:5414	septin 4	1.26792	0.001053	98	160	259	380
LGALS1	protein-coding	chr22:37675606-37679802	+	hsa:3956	lectin, galactoside-binding, soluble, 1	1.33403	3.48394e-06	14289	17488	34723	49125
PLEKHH1	protein-coding	chr14:67533199-67589534	+	hsa:57475	pleckstrin homology domain containing, family H (with MyTH4 domain) member 1	-0.900368	0.0050493	492	501	303	265
ATP8B3	protein-coding	chr19:1782070-1812237	-	hsa:148229	ATPase, aminophospholipid transporter, class I, type 8B, member 3	1.65338	7.7755e-08	335	339	1032	1220
ATP8B1	protein-coding	chr18:57646426-57803095	-	hsa:5205	ATPase, aminophospholipid transporter, class I, type 8B, member 1	-1.0772	0.0162992	219	342	205	75
RNPC3	protein-coding	chr1:103525956-103555239	+	hsa:55599	RNA-binding region (RNP1, RRM) containing 3	-1.07222	0.0428887	63	108	43	41
PLEKHG2	protein-coding	chr19:39413110-39428415	+	hsa:64857	pleckstrin homology domain containing, family G (with RhoGef domain) member 2	0.940901	0.0016878	398	537	845	1027
PLEKHS1	protein-coding	chr10:113751315-113777730	+	hsa:79949	pleckstrin homology domain containing, family S member 1	7.74219	3.83848e-06	0	0	52	32
PLEKHO1	protein-coding	chr1:150149434-150160065	+	hsa:51177	pleckstrin homology domain containing, family O member 1	0.991386	0.0106955	85	126	207	229
PLEKHO2	protein-coding	chr15:64841883-64868002	+	hsa:80301	pleckstrin homology domain containing, family O member 2	0.992564	0.000543691	402	514	947	966
RAMP1	protein-coding	chr2:237858714-237912114	+	hsa:10267	receptor (G protein-coupled) activity modifying protein 1	1.07075	0.00146187	294	430	621	951
RNVU1-15	snRNA	chr1:144412576-144412740	+	hsa:101954267	RNA, variant U1 small nuclear 15	1.03637	0.00613134	134	157	255	371
RSAD1	protein-coding	chr17:50478800-50485980	+	hsa:55316	radical S-adenosyl methionine domain containing 1	-0.916083	0.00118897	837	1173	572	541
DMAP1	protein-coding	chr1:44213453-44220679	+	hsa:55929	DNA methyltransferase 1 associated protein 1	0.779358	0.0151191	273	365	504	638
KATNAL1	protein-coding	chr13:30202626-30307500	-	hsa:84056	katanin p60 subunit A-like 1	1.25557	0.000954718	312	503	1440	603
ZFP36L2	protein-coding	chr2:43222402-43226606	-	hsa:678	ZFP36 ring finger protein-like 2	-0.730273	0.0322075	355	539	345	219
IPO11	protein-coding	chr5:62412746-62628589	+	hsa:51194	importin 11	-1.25746	0.0037439	156	155	74	65
HSP90AB3P	pseudo	chr4:87891748-87894288	+		heat shock protein 90kDa alpha (cytosolic), class B member 3, pseudogene	-1.12122	0.00259075	246	291	155	107
B4GALNT1	protein-coding	chr12:57625895-57633239	-	hsa:2583	beta-1,4-N-acetyl-galactosaminyl transferase 1	1.29531	6.15304e-06	692	896	1810	2263
PSMC3	protein-coding	chr11:47418775-47426473	-	hsa:5702	proteasome (prosome, macropain) 26S subunit, ATPase, 3	0.688283	0.0103935	2849	3517	4950	5815
PSMC5	protein-coding	chr17:63827418-63832019	+	hsa:5705	proteasome (prosome, macropain) 26S subunit, ATPase, 5	0.911334	0.00085633	667	827	1506	1452
PSMB4	protein-coding	chr1:151399565-151401936	+	hsa:5692	proteasome (prosome, macropain) subunit, beta type, 4	0.961438	0.000587945	7773	10560	15913	21233
ALPPL2	protein-coding	chr2:232406842-232410714	+	hsa:251	alkaline phosphatase, placental-like 2	5.77679	0.000715818	0	1	25	32
GATSL3	protein-coding	chr22:30285118-30289627	-	hsa:652968	GATS protein-like 3	1.14478	0.0174653	67	90	114	245
PSMD8	protein-coding	chr19:38374550-38383824	+	hsa:5714	proteasome (prosome, macropain) 26S subunit, non-ATPase, 8	0.709265	0.0155302	5385	5694	8043	11107
PSMD9	protein-coding	chr12:121888731-121917865	+	hsa:5715	proteasome (prosome, macropain) 26S subunit, non-ATPase, 9	0.851745	0.00971314	573	538	880	1254
TIMM8A	protein-coding	chrx:101348038-101348720	-	hsa:1678	translocase of inner mitochondrial membrane 8 homolog A (yeast)	-0.720698	0.0373961	265	316	205	168
BMP1	protein-coding	chr8:22165140-22201483	+	hsa:649	bone morphogenetic protein 1	0.813957	0.0044092	848	986	1539	1856
BMP7	protein-coding	chr20:57168753-57266651	-	hsa:655	bone morphogenetic protein 7	1.61037	9.17014e-05	158	99	367	488
DDHD1	protein-coding	chr14:53036740-53153328	-	hsa:80821	DDHD domain containing 1	-0.751134	0.0402872	651	799	634	285
LOC101929715	ncRNA	chr2:10449728-10455552	+	hsa:101929715	uncharacterized LOC101929715	-1.29792	0.0381416	56	64	33	19
TAF1	protein-coding	chrx:71366239-71530361	+	hsa:6872	TAF1 RNA polymerase II, TATA box binding protein (TBP)-associated factor, 250kDa	-0.688284	0.0315416	410	631	389	285
ZCCHC7	protein-coding	chr9:37120503-37358149	+	hsa:84186	zinc finger, CCHC domain containing 7	-0.764057	0.0482215	235	284	208	117
RNU12	snRNA	chr22:42615245-42615393	+	hsa:267010	RNA, U12 small nuclear	0.641958	0.0444363	298	443	529	669
RNU11	snRNA	chr1:28648600-28648734	+	hsa:26824	RNA, U11 small nuclear	0.775533	0.025757	158	298	387	413
FZD3	protein-coding	chr8:28519111-28564440	+	hsa:7976	frizzled class receptor 3	-1.43752	0.00108636	128	298	90	70
FZD6	protein-coding	chr8:103298831-103332866	+	hsa:8323	frizzled class receptor 6	1.18549	0.000636207	569	540	1800	930
SLC1A3	protein-coding	chr5:36606355-36688334	+	hsa:6507	solute carrier family 1 (glial high affinity glutamate transporter), member 3	-1.7027	0.0054636	56	82	19	25
SLC1A4	protein-coding	chr2:64988445-65023865	+	hsa:6509	solute carrier family 1 (glutamate/neutral amino acid transporter), member 4	1.66343	0.00536606	17	33	68	94
DCUN1D3	protein-coding	chr16:20854925-20900358	-	hsa:123879	DCN1, defective in cullin neddylation 1, domain containing 3	1.17349	6.55349e-06	1264	1638	3581	3296
SEPT5-GP1BB	ncRNA	chr22:19717220-19724774	+	hsa:100526833	SEPT5-GP1BB readthrough	0.654511	0.0463982	242	341	421	533
TANK	protein-coding	chr2:161160726-161236176	+	hsa:10010	TRAF family member-associated NFKB activator	-0.998497	0.0318902	277	319	245	76
TC2N	protein-coding	chr14:91779751-91836526	-	hsa:123036	tandem C2 domains, nuclear	-3.91686	0.0170977	19	8	1	1
NPEPL1	protein-coding	chr20:58689131-58715844	+	hsa:79716	aminopeptidase-like 1	1.24347	0.0003093	228	223	485	649
LOC105378159	protein-coding	chr6:130288003-130386905	-		uncharacterized LOC105378159	-2.93651	0.0106534	10	45	2	5
ZZEF1	protein-coding	chr17:4006977-4143020	-	hsa:23140	zinc finger, ZZ-type with EF-hand domain 1	-0.645318	0.0371707	507	749	486	354
C21orf58	protein-coding	chr21:46300430-46320825	-	hsa:54058	chromosome 21 open reading frame 58	-0.751685	0.0359322	258	408	175	233
SEC14L2	protein-coding	chr22:30396941-30425303	+	hsa:23541	SEC14-like 2 (S. cerevisiae)	1.08998	0.000445907	330	359	711	840
IGSF9	protein-coding	chr1:159927039-159945596	-	hsa:57549	immunoglobulin superfamily, member 9	-1.84058	0.000144812	98	216	42	47
IGSF5	protein-coding	chr21:39725838-39802081	+	hsa:150084	immunoglobulin superfamily, member 5	5.99945	0.00390191	0	0	14	11
SBF2-AS1	ncRNA	chr11:9758293-9811319	+	hsa:283104	SBF2 antisense RNA 1	2.16317	0.0316674	3	10	18	40
TMEM200A	protein-coding	chr6:130366281-130443067	+	hsa:114801	transmembrane protein 200A	-2.87479	3.45474e-13	425	542	96	44
DHX15	protein-coding	chr4:24527464-24584561	-	hsa:1665	DEAH (Asp-Glu-Ala-His) box helicase 15	-0.750537	0.0139017	2137	3243	2108	1243
DHX32	protein-coding	chr10:125836337-125896481	-	hsa:55760	DEAH (Asp-Glu-Ala-His) box polypeptide 32	-1.01013	0.000274298	1316	1876	924	735
DHX33	protein-coding	chr17:5440912-5469060	-	hsa:56919	DEAH (Asp-Glu-Ala-His) box polypeptide 33	-0.817474	0.00556457	1075	1423	892	603
TACC1	protein-coding	chr8:38728490-38853028	+	hsa:6867	transforming, acidic coiled-coil containing protein 1	0.644768	0.0454415	1184	1699	3115	1635
MAPK8IP2	protein-coding	chr22:50600685-50611551	+	hsa:23542	mitogen-activated protein kinase 8 interacting protein 2	1.56139	2.772e-06	161	223	513	666
MAPK8IP1	protein-coding	chr11:45885496-45906465	+	hsa:9479	mitogen-activated protein kinase 8 interacting protein 1	1.05862	0.000493066	441	561	946	1236
CDPF1	protein-coding	chr22:46246673-46250679	-	hsa:150383	cysteine-rich, DPF motif domain containing 1	-0.757776	0.0324231	310	511	207	292
PACSIN1	protein-coding	chr6:34485080-34536262	+	hsa:29993	protein kinase C and casein kinase substrate in neurons 1	1.02783	0.00298166	146	173	328	357
PACSIN2	protein-coding	chr22:42870151-43015690	-	hsa:11252	protein kinase C and casein kinase substrate in neurons 2	0.591889	0.0343653	681	903	1399	1112
MGC27345	ncRNA	chr7:128297685-128307763	-	hsa:157247	uncharacterized protein MGC27345	-1.33073	0.00352875	112	204	79	51
RPL26P19	pseudo	chr5:56504592-56505114	-		ribosomal protein L26 pseudogene 19	-0.711968	0.0183686	625	682	418	428
PARD6B	protein-coding	chr20:50731544-50753741	+	hsa:84612	par-6 family cell polarity regulator beta	-0.79222	0.0156543	622	843	564	329
SPRED3	protein-coding	chr19:38390063-38399587	+	hsa:399473	sprouty-related, EVH1 domain containing 3	1.68706	0.000103047	49	63	166	211
CYP2S1	protein-coding	chr19:41193238-41207539	+	hsa:29785	cytochrome P450, family 2, subfamily S, polypeptide 1	1.09843	0.000623237	675	843	1312	2079
FOXCUT	lncRNA	chr6:1605531-1607358	+	hsa:101927703	FOXC1 upstream transcript (non-protein coding)	5.27772	0.0278939	0	0	6	9
TCF7	protein-coding	chr5:134114703-134148227	+	hsa:6932	transcription factor 7 (T-cell specific, HMG-box)	0.704294	0.0172262	573	892	1114	1353
ADORA2B	protein-coding	chr17:15944726-15975746	+	hsa:136	adenosine A2b receptor	0.592877	0.0306478	1000	1294	1710	1913
CDR2L	protein-coding	chr17:74987647-75005800	+	hsa:30850	cerebellar degeneration-related protein 2-like	0.680662	0.0258083	855	1131	1356	1958
TCN2	protein-coding	chr22:30607083-30627060	+	hsa:6948	transcobalamin II	1.4739	0.000330624	80	80	204	267
CYP2J2	protein-coding	chr1:59893308-59926798	-	hsa:1573	cytochrome P450, family 2, subfamily J, polypeptide 2	-2.2169	0.0176166	24	34	6	7
TIMM10	protein-coding	chr11:57528463-57530759	-	hsa:26519	translocase of inner mitochondrial membrane 10 homolog (yeast)	0.732384	0.0199428	725	871	1113	1663
NDUFC2	protein-coding	chr11:78068347-78080219	-	hsa:4718	NADH dehydrogenase (ubiquinone) 1, subcomplex unknown, 2, 14.5kDa	-0.719932	0.0121219	1916	3031	1384	1715
OSBPL10	protein-coding	chr3:31660825-31981850	-	hsa:114884	oxysterol binding protein-like 10	0.709743	0.0116206	505	669	1027	986
C10orf2	protein-coding	chr10:100987536-100994401	+	hsa:56652	chromosome 10 open reading frame 2	-0.977607	0.000572898	986	1193	643	527
MIR626	ncRNA	chr15:41691585-41691678	+	hsa:693211	microRNA 626	-5.09086	0.0455972	5	7	0	0
DMBT1	protein-coding	chr10:122560677-122643736	+	hsa:1755	deleted in malignant brain tumors 1	7.68207	4.6886e-06	0	0	41	39
NDUFS1	protein-coding	chr2:206121971-206159447	-	hsa:4719	NADH dehydrogenase (ubiquinone) Fe-S protein 1, 75kDa (NADH-coenzyme Q reductase)	-1.07549	0.0413795	82	90	52	35
MBNL1	protein-coding	chr3:152268865-152465210	+	hsa:4154	muscleblind-like splicing regulator 1	-0.736037	0.0249419	488	595	422	268
MBNL3	protein-coding	chrx:132372002-132489038	-	hsa:55796	muscleblind-like splicing regulator 3	1.90884	4.68158e-06	186	220	1210	426
ERLEC1	protein-coding	chr2:53786931-53818819	+	hsa:27248	endoplasmic reticulum lectin 1	0.624592	0.0483706	572	743	1350	796
RNU4-2	snRNA	chr12:120291763-120291903	-	hsa:26834	RNA, U4 small nuclear 2	1.10173	0.0235502	54	49	110	126
ARFGAP3	protein-coding	chr22:42796526-42857292	-	hsa:26286	ADP-ribosylation factor GTPase activating protein 3	1.00783	0.00896946	202	269	691	314
MIR31HG	ncRNA	chr9:21454268-21559698	-	hsa:554202	MIR31 host gene (non-protein coding)	2.58979	1.23349e-06	30	17	145	163
LOC284912	miscRNA	chr22:35627576-35637850	-		uncharacterized LOC284912	5.29035	0.0285622	0	0	4	11
LOC105373886	lncRNA	chr2:219730101-219737928	+		uncharacterized LOC105373886	-1.8555	0.000794078	72	109	26	26
LOC105373888	lncRNA	chr2:219791594-219794531	+		uncharacterized LOC105373888	-1.5679	0.000113672	199	255	67	93
PSRC1	protein-coding	chr1:109279556-109283144	-	hsa:84722	proline/serine-rich coiled-coil 1	0.662675	0.0235932	1083	1422	1761	2374
LOC105373893	lncRNA	chr2:220067712-220494306	+		uncharacterized LOC105373893	-1.92497	0.00385402	46	71	16	16
ZNF385A	protein-coding	chr12:54369129-54384730	-	hsa:25946	zinc finger protein 385A	1.45291	1.22995e-06	948	1224	2543	3657
CCDC163P	miscRNA	chr1:45493926-45500079	-	hsa:126661	coiled-coil domain containing 163, pseudogene	0.859219	0.0309693	116	158	200	316
GTF3C3	protein-coding	chr2:196780089-196799768	-	hsa:9330	general transcription factor IIIC, polypeptide 3, 102kDa	-0.730482	0.0230427	949	1302	917	515
LOC107985268	lncRNA					-5.1667	0.0397269	4	9	0	0
LOC107985263	lncRNA					5.80768	0.00713645	0	0	14	8
GTF2E2	protein-coding	chr8:30578516-30655184	-	hsa:2961	general transcription factor IIE, polypeptide 2, beta 34kDa	-0.709003	0.0117372	827	1074	642	580
GLRX2	protein-coding	chr1:193096465-193105478	-	hsa:51022	glutaredoxin 2	-1.51002	0.00524747	97	103	27	47
GULOP	pseudo	chr8:27577611-27589073	+		gulonolactone (L-) oxidase, pseudogene	-4.26381	0.0485275	5	14	1	0
TAF4B	protein-coding	chr18:26226491-26315313	+	hsa:6875	TAF4b RNA polymerase II, TATA box binding protein (TBP)-associated factor, 105kDa	-1.2481	0.0131583	124	107	42	62
TNFAIP2	protein-coding	chr14:103123465-103137439	+	hsa:7127	tumor necrosis factor, alpha-induced protein 2	0.766614	0.00573401	684	892	1351	1457
TNFAIP1	protein-coding	chr17:28335566-28347009	+	hsa:7126	tumor necrosis factor, alpha-induced protein 1 (endothelial)	0.650547	0.0162638	1571	1902	2686	3046
C6orf120	protein-coding	chr6:169702112-169706358	+	hsa:387263	chromosome 6 open reading frame 120	-0.759568	0.0268631	263	356	214	170
TMEM106A	protein-coding	chr17:43211852-43220041	+	hsa:113277	transmembrane protein 106A	1.22507	0.00233846	81	87	233	185
TEP1	protein-coding	chr14:20365667-20413420	-	hsa:7011	telomerase-associated protein 1	-0.68203	0.022048	525	697	401	397
MOXD1	protein-coding	chr6:132296055-132401534	-	hsa:26002	monooxygenase, DBH-like 1	1.94589	0.000484414	32	25	157	82
TERT	protein-coding	chr5:1253167-1295626	-	hsa:7015	telomerase reverse transcriptase	-2.24875	0.00791533	42	55	3	18
C6orf1	protein-coding	chr6:34246380-34249108	-	hsa:221491	chromosome 6 open reading frame 1	0.850486	0.0116225	284	345	483	704
ILDR1	protein-coding	chr3:121987323-122022280	-	hsa:286676	immunoglobulin-like domain containing receptor 1	-4.97777	1.66912e-05	39	50	3	0
ILDR2	protein-coding	chr1:166913204-166973590	-	hsa:387597	immunoglobulin-like domain containing receptor 2	-2.4448	0.000211516	59	86	19	9
MTERF3	protein-coding	chr8:96239398-96261613	-	hsa:51001	mitochondrial transcription termination factor 3	-0.782355	0.0256664	298	605	301	237
BRF2	protein-coding	chr8:37843880-37849913	-	hsa:55290	BRF2, RNA polymerase III transcription initiation factor 50 kDa subunit	0.677199	0.0405095	259	274	417	486
COLGALT1	protein-coding	chr19:17556521-17583159	+	hsa:79709	collagen beta(1-O)galactosyltransferase 1	-0.813499	0.00401681	6971	8771	3990	5376
BRI3	protein-coding	chr7:98281724-98322398	+	hsa:25798	brain protein I3	0.794608	0.00961123	528	691	932	1273
H3F3B	protein-coding	chr17:75776434-75779935	-	hsa:3021	H3 histone, family 3B (H3.3B)	0.697302	0.00596565	12826	18574	27020	26041
KLC2	protein-coding	chr11:66257620-66267860	+	hsa:64837	kinesin light chain 2	0.657467	0.0346911	692	743	1004	1386
KLC3	protein-coding	chr19:45340740-45351520	+	hsa:147700	kinesin light chain 3	0.706907	0.0314958	403	492	614	914
KLF9	protein-coding	chr9:70384597-70414657	-	hsa:687	Kruppel-like factor 9	-0.925157	0.024532	263	307	221	100
OXR1	protein-coding	chr8:106270178-106752694	+	hsa:55074	oxidation resistance 1	-3.45519	0.0169649	12	20	1	2
KLF4	protein-coding	chr9:107484852-107489720	-	hsa:9314	Kruppel-like factor 4 (gut)	-1.21139	0.000573131	502	765	374	200
KLF2	protein-coding	chr19:16324826-16328662	+	hsa:10365	Kruppel-like factor 2	1.00041	0.000507093	851	1086	1780	2272
XRN2	protein-coding	chr20:21303503-21346386	+	hsa:22803	5'-3' exoribonuclease 2	-0.742794	0.0069586	2914	3613	2409	1719
LOC107985320	protein-coding					6.00709	0.00380209	0	0	12	13
KLK1	protein-coding	chr19:50819146-50823787	-	hsa:3816	kallikrein 1	1.40606	0.0269319	21	31	47	95
KLK8	protein-coding	chr19:50996008-51001702	-	hsa:11202	kallikrein-related peptidase 8	-0.830855	0.0145789	277	347	187	182
KLK6	protein-coding	chr19:50958631-50969673	-	hsa:5653	kallikrein-related peptidase 6	1.22193	2.48121e-05	1050	1452	2594	3472
C6orf223	protein-coding	chr6:43999515-44007615	+	hsa:221416	chromosome 6 open reading frame 223	0.683309	0.0173479	547	779	1042	1174
TFPI	protein-coding	chr2:187478578-187554492	-	hsa:7035	tissue factor pathway inhibitor (lipoprotein-associated coagulation inhibitor)	-0.927209	0.0265814	289	318	241	102
LPAR5	protein-coding	chr12:6618835-6636131	-	hsa:57121	lysophosphatidic acid receptor 5	0.837449	0.0218808	116	189	264	299
PCYOX1	protein-coding	chr2:70258099-70281185	+	hsa:51449	prenylcysteine oxidase 1	0.706744	0.028066	1006	1201	2501	1339
MBTD1	protein-coding	chr17:51177419-51260071	-	hsa:54799	mbt domain containing 1	-1.20604	0.000428006	574	844	417	229
KYAT1	protein-coding					-1.0604	0.00517253	216	297	110	146
KYAT3	protein-coding					-0.817446	0.0204099	303	486	286	181
CCDC183-AS1	ncRNA	chr9:136803927-136808848	-	hsa:100131193	CCDC183 antisense RNA 1	2.59683	0.0251887	7	1	14	40
LPAR3	protein-coding	chr1:84813403-84893213	-	hsa:23566	lysophosphatidic acid receptor 3	-0.677421	0.023912	913	1206	599	783
LAPTM5	protein-coding	chr1:30732468-30757836	-	hsa:7805	lysosomal protein transmembrane 5	4.28342	0.0382614	1	0	8	13
SNTB1	protein-coding	chr8:120535745-120812069	-	hsa:6641	syntrophin, beta 1 (dystrophin-associated protein A1, 59kDa, basic component 1)	2.81461	1.78226e-12	42	71	520	310
SNTB2	protein-coding	chr16:69186133-69309052	+	hsa:6645	syntrophin, beta 2 (dystrophin-associated protein A1, 59kDa, basic component 2)	1.13211	0.00107493	181	169	415	406
GAB2	protein-coding	chr11:78215296-78318214	-	hsa:9846	GRB2-associated binding protein 2	0.896345	0.00556395	211	299	457	531
SAMD3	protein-coding	chr6:130142684-130215294	-	hsa:154075	sterile alpha motif domain containing 3	-4.45621	0.00318453	19	22	2	0
SAMD5	protein-coding	chr6:147508692-147570021	+	hsa:389432	sterile alpha motif domain containing 5	1.67443	0.00938143	22	41	167	44
TGM2	protein-coding	chr20:38127387-38165429	-	hsa:7052	transglutaminase 2	3.6546	1.18756e-40	500	591	6651	7805
GRIN2B	protein-coding	chr12:13537337-13608679	-	hsa:2904	glutamate receptor, ionotropic, N-methyl D-aspartate 2B	-1.9122	3.04599e-07	389	459	155	85
DRAXIN	protein-coding	chr1:11691724-11720279	+	hsa:374946	dorsal inhibitory axon guidance protein	3.30844	4.43434e-16	25	46	340	385
GAS5	ncRNA	chr1:173863901-173867987	-	hsa:60674	growth arrest-specific 5 (non-protein coding)	-0.794887	0.00593192	815	1147	557	621
GAS7	protein-coding	chr17:9910666-10036751	-	hsa:8522	growth arrest-specific 7	1.2792	0.000104185	145	228	469	470
GART	protein-coding	chr21:33503931-33542892	-	hsa:2618	phosphoribosylglycinamide formyltransferase, phosphoribosylglycinamide synthetase, phosphoribosylaminoimidazole synthetase	-1.30755	6.27229e-06	761	993	385	359
RASD2	protein-coding	chr22:35541507-35554003	+	hsa:23551	RASD family, member 2	0.882339	0.0409755	74	116	144	217
RASA3	protein-coding	chr13:113977787-114074627	-	hsa:22821	RAS p21 protein activator 3	1.32048	0.0101171	46	85	101	231
CAMK2N2	protein-coding	chr3:184259215-184261463	-	hsa:94032	calcium/calmodulin-dependent protein kinase II inhibitor 2	2.42452	7.27792e-05	11	31	79	147
THPO	protein-coding	chr3:184371935-184378208	-	hsa:7066	thrombopoietin	5.46276	0.0182506	0	0	6	11
THRB	protein-coding	chr3:24119496-24495027	-	hsa:7068	thyroid hormone receptor, beta	-7.35915	2.42647e-05	27	30	0	0
MTFMT	protein-coding	chr15:65001512-65029639	-	hsa:123263	mitochondrial methionyl-tRNA formyltransferase	-0.696738	0.0215973	477	652	359	369
ANKRD18CP	pseudo	chr9:97155893-97238742	-	hsa:100287922	ankyrin repeat domain 18C, pseudogene	5.50442	0.0176177	0	0	14	4
RNA5SP448	ncRNA	chr17:74417594-74417704	-		RNA, 5S ribosomal pseudogene 448	-2.18423	0.0393141	20	23	5	5
NXPE3	protein-coding	chr3:101779442-101828231	+	hsa:91775	neurexophilin and PC-esterase domain family, member 3	0.991453	0.0119086	196	326	757	330
NMNAT2	protein-coding	chr1:183248237-183418499	-	hsa:23057	nicotinamide nucleotide adenylyltransferase 2	8.78874	2.08948e-08	0	0	84	88
NMNAT3	protein-coding	chr3:139560191-139677965	-	hsa:349565	nicotinamide nucleotide adenylyltransferase 3	-1.00648	0.0383512	102	111	49	63
GBX1	protein-coding	chr7:151148009-151167191	-	hsa:2636	gastrulation brain homeobox 1	2.97079	5.98516e-06	5	19	100	90
GBX2	protein-coding	chr2:236165236-236168009	-	hsa:2637	gastrulation brain homeobox 2	1.01359	0.017113	66	87	150	173
NBPF1	protein-coding	chr1:16562427-16613605	-	hsa:55672	neuroblastoma breakpoint family, member 1	0.848679	0.0130607	154	188	333	316
LINC01012	ncRNA	chr6:27694035-27710222	+	hsa:100507173	long intergenic non-protein coding RNA 1012	-1.77925	0.00250538	73	92	34	17
LINC01011	ncRNA	chr6:2987967-2991171	+	hsa:401232	long intergenic non-protein coding RNA 1011	-1.24404	0.0102791	99	116	51	45
LINC01003	ncRNA	chr7:152464124-152465545	+	hsa:100128822	long intergenic non-protein coding RNA 1003	-1.92142	0.0317799	21	51	5	14
TMEM150C	protein-coding	chr4:82484451-82561973	-	hsa:441027	transmembrane protein 150C	1.84881	0.0189684	11	14	70	26
TMEM151A	protein-coding	chr11:66291902-66296664	+	hsa:256472	transmembrane protein 151A	1.57205	0.000224306	76	72	191	276
ZNF703	protein-coding	chr8:37695751-37700021	+	hsa:80139	zinc finger protein 703	1.75234	2.25513e-05	61	79	204	288
ZNF704	protein-coding	chr8:80628451-80874781	-	hsa:619279	zinc finger protein 704	-1.11553	0.0095202	582	894	550	170
ZNF655	protein-coding	chr7:99557726-99572159	+	hsa:79027	zinc finger protein 655	0.592975	0.0325921	636	803	1217	1069
LOC107985684	lncRNA					5.42898	0.0201612	0	0	12	5
GCAT	protein-coding	chr22:37807912-37817177	+	hsa:23464	glycine C-acetyltransferase	-0.855642	0.00370747	2236	2466	1172	1569
LOC255187	ncRNA	chr5:149063317-149109787	+	hsa:255187	uncharacterized LOC255187	6.27457	0.00159362	0	0	13	17
NKILA	lncRNA	chr20:57710183-57712780	+		NF-kappaB interacting long non-coding RNA	4.13093	0.0016851	3	0	17	41
ZNF692	protein-coding	chr1:248850006-248860758	-	hsa:55657	zinc finger protein 692	-0.702752	0.0335778	418	471	256	320
ADAM10	protein-coding	chr15:58595204-58749978	-	hsa:102	ADAM metallopeptidase domain 10	0.810448	0.0280291	1039	1248	3072	1222
ARL8A	protein-coding	chr1:202133404-202144743	-	hsa:127829	ADP-ribosylation factor-like 8A	0.965672	0.000696173	701	779	1440	1616
HSPA13	protein-coding	chr21:14371115-14383188	-	hsa:6782	heat shock protein 70kDa family, member 13	0.811814	0.0495296	473	404	1231	455
GCN1	protein-coding	chr12:120127210-120194710	-	hsa:10985	GCN1 general control of amino-acid synthesis 1-like 1 (yeast)	-0.889269	0.000641455	5634	6834	3422	3662
NOVA2	protein-coding	chr19:45936366-45962680	-	hsa:4858	neuro-oncological ventral antigen 2	0.899772	0.0164844	125	195	256	360
ARL4C	protein-coding	chr2:234493041-234497049	-	hsa:10123	ADP-ribosylation factor-like 4C	2.66901	1.80749e-13	90	179	1115	653
ARL4D	protein-coding	chr17:43399116-43401136	+	hsa:379	ADP-ribosylation factor-like 4D	1.39399	1.9111e-05	213	366	690	873
PCYT1A	protein-coding	chr3:196237745-196287752	-	hsa:5130	phosphate cytidylyltransferase 1, choline, alpha	0.843406	0.00245245	549	714	1190	1187
BVES	protein-coding	chr6:105096822-105137174	-	hsa:11149	blood vessel epicardial substance	2.35234	3.11132e-10	59	76	416	311
RNA5SP392	pseudo	chr15:40331537-40331648	-		RNA, 5S ribosomal pseudogene 392	5.22601	0.00374833	1	0	17	23
TNNT1	protein-coding	chr19:55132698-55149354	-	hsa:7138	troponin T type 1 (skeletal, slow)	0.697529	0.0148967	1527	2100	2634	3483
TMPRSS5	protein-coding	chr11:113687548-113709811	-	hsa:80975	transmembrane protease, serine 5	3.5956	0.000839747	6	0	34	48
FHOD1	protein-coding	chr16:67229389-67247522	-	hsa:29109	formin homology 2 domain containing 1	-2.44658	1.70398e-14	622	893	133	156
ZNF608	protein-coding	chr5:124636917-124745112	-	hsa:57507	zinc finger protein 608	-1.24035	0.00280263	164	190	91	68
LOC642852	ncRNA	chr21:45288052-45297354	+	hsa:642852	uncharacterized LOC642852	1.04395	0.00725555	91	141	299	201
SSBP2	protein-coding	chr5:81417360-81751253	-	hsa:23635	single-stranded DNA binding protein 2	-1.59711	0.0367396	47	39	22	9
ZNF532	protein-coding	chr18:58916779-58986474	+	hsa:55205	zinc finger protein 532	0.664758	0.0265846	433	548	952	691
ZNF516	protein-coding	chr18:76358190-76494815	-	hsa:9658	zinc finger protein 516	-0.884228	0.00202439	778	981	538	466
ZNF511	protein-coding	chr10:133308889-133313162	+	hsa:118472	zinc finger protein 511	0.709332	0.0202007	382	479	666	809
ZNF579	protein-coding	chr19:55577078-55580821	-	hsa:163033	zinc finger protein 579	0.794455	0.0163781	296	419	529	757
ZNF575	protein-coding	chr19:43531805-43536090	+	hsa:284346	zinc finger protein 575	2.47995	0.027446	7	2	12	43
TJP3	protein-coding	chr19:3721699-3750813	+	hsa:27134	tight junction protein 3	-0.928606	0.00142712	915	1143	523	611
OR51K1P	pseudo	chr11:5430656-5431602	-		olfactory receptor, family 51, subfamily K, member 1 pseudogene	-3.42092	0.00096896	38	41	8	0
LOC107985780	lncRNA					-2.50471	0.0475466	19	23	8	0
ZNF554	protein-coding	chr19:2826280-2834998	+	hsa:115196	zinc finger protein 554	-1.03396	0.0145618	140	162	81	75
NOTUM	protein-coding	chr17:81952507-81961181	-	hsa:147111	notum pectinacetylesterase homolog (Drosophila)	0.990082	0.00378601	210	231	401	523
TNNC1	protein-coding	chr3:52451091-52454041	-	hsa:7134	troponin C type 1 (slow)	1.85203	0.00155067	19	32	70	119
HSPB11	protein-coding	chr1:53921561-53945823	-	hsa:51668	heat shock protein family B (small), member 11	0.680219	0.0255352	282	379	589	522
ZNF589	protein-coding	chr3:48241022-48275293	+	hsa:51385	zinc finger protein 589	-2.11956	0.00304225	55	67	23	7
PRKCDBP	protein-coding	chr11:6318946-6320510	-	hsa:112464	protein kinase C, delta binding protein	1.56123	6.42358e-07	426	574	1245	1823
SHANK2	protein-coding	chr11:70468159-70720787	-	hsa:22941	SH3 and multiple ankyrin repeat domains 2	0.79568	0.0256476	146	159	293	269
TMSB15A	protein-coding	chrx:102513682-102516771	-	hsa:11013	thymosin beta 15a	-1.08012	0.011667	172	215	72	119
EPS8L2	protein-coding	chr11:705217-727727	+	hsa:64787	EPS8-like 2	0.853753	0.00230088	1279	1491	2383	2887
EPS8L3	protein-coding	chr1:109750080-109764022	-	hsa:79574	EPS8-like 3	5.74153	4.23607e-06	2	0	47	68
MAP7D1	protein-coding	chr1:36155965-36180849	+	hsa:55700	MAP7 domain containing 1	0.704513	0.0119817	2200	2586	3615	4585
IZUMO4	protein-coding	chr19:2096869-2099584	+	hsa:113177	IZUMO family member 4	2.06755	0.00943779	5	19	38	62
RNU6-28P	pseudo	chr22:31479385-31479488	-	hsa:100873756	RNA, U6 small nuclear 28, pseudogene	-5.33265	0.029272	3	12	0	0
OXLD1	protein-coding	chr17:81665036-81666637	-	hsa:339229	oxidoreductase-like domain containing 1	-0.849279	0.0127823	599	908	331	531
EVA1B	protein-coding	chr1:36322030-36323648	-	hsa:55194	eva-1 homolog B (C. elegans)	1.2296	0.000965223	216	203	401	642
ARMC4	protein-coding	chr10:27796355-27998906	-	hsa:55130	armadillo repeat containing 4	-4.14385	0.000408873	30	36	4	0
RTN4RL2	protein-coding	chr11:57460537-57477539	+	hsa:349667	reticulon 4 receptor-like 2	0.878449	0.0147188	252	386	448	759
ZNF862	protein-coding	chr7:149842409-149867479	+	hsa:643641	zinc finger protein 862	-0.91338	0.0357686	122	149	84	68
LOC100126784	ncRNA	chr11:19710934-19714672	-	hsa:100126784	uncharacterized LOC100126784	6.29532	0.00162671	0	0	22	9
DICER1-AS1	ncRNA	chr14:95157688-95179933	+	hsa:400242	DICER1 antisense RNA 1	-1.5674	0.0279057	68	36	23	16
BCL2L15	protein-coding	chr1:113876814-113887547	-	hsa:440603	BCL2-like 15	3.00619	0.00789004	2	4	28	22
NTF6B	pseudo	chr19:49038234-49039138	-		neurotrophin 6 beta (pseudogene)	4.8438	0.0104455	1	0	16	15
TLE2	protein-coding	chr19:2997638-3029109	-	hsa:7089	transducin-like enhancer of split 2	0.844656	0.00667704	632	842	1119	1635
B3GALT5-AS1	lncRNA	chr21:39605599-39612822	-	hsa:114041	B3GALT5 antisense RNA 1	3.37039	0.00010922	6	3	53	48
ZNF800	protein-coding	chr7:127342871-127392803	-	hsa:168850	zinc finger protein 800	-1.03268	0.0253114	450	720	477	127
LOC105373957	lncRNA	chr2:237485700-237487163	-		uncharacterized LOC105373957	6.27457	0.00159362	0	0	13	17
KRT7	protein-coding	chr12:52233170-52248925	+	hsa:3855	keratin 7, type II	2.5195	9.13966e-16	383	371	1948	2646
LOC105373984	lncRNA	chr2:105144113-105145424	+		anther-specific proline-rich protein APG-like	5.40298	0.0288689	0	0	1	15
KRT8	protein-coding	chr12:52897187-52926469	-	hsa:3856	keratin 8, type II	1.15573	3.67043e-05	65897	69032	140789	177730
LOC105373968	lncRNA	chr2:240252144-240256433	-		uncharacterized LOC105373968	2.56393	4.06076e-05	17	12	79	105
LOC105373914	lncRNA	chr2:225680501-225891591	-		uncharacterized LOC105373914	-2.44936	0.0205607	23	23	5	4
ZNF772	protein-coding	chr19:57464198-57480950	-	hsa:400720	zinc finger protein 772	3.09081	0.00131394	1	9	34	50
TLR3	protein-coding	chr4:186069155-186085098	+	hsa:7098	toll-like receptor 3	2.01639	0.00941349	4	30	90	46
WIPF3	protein-coding	chr7:29806554-29917066	+	hsa:644150	WAS/WASL interacting protein family, member 3	-1.13234	0.000763677	314	490	184	196
PXDC1	protein-coding	chr6:3722604-3751713	-	hsa:221749	PX domain containing 1	1.0594	0.00152038	156	272	467	453
ERVMER34-1	protein-coding	chr4:52743517-52751640	-	hsa:100288413	endogenous retrovirus group MER34, member 1	-1.34408	6.17368e-06	713	975	391	307
SNX21	protein-coding	chr20:45833418-45838318	+	hsa:90203	sorting nexin family member 21	0.729556	0.025269	291	371	490	657
SNX24	protein-coding	chr5:122845510-123014268	+	hsa:28966	sorting nexin 24	0.873126	0.0159546	133	198	379	256
ZMIZ2	protein-coding	chr7:44756188-44769881	+	hsa:83637	zinc finger, MIZ-type containing 2	0.676796	0.0198991	1055	1286	1698	2225
ZMIZ1	protein-coding	chr10:79068994-79316519	+	hsa:57178	zinc finger, MIZ-type containing 1	0.730853	0.00691662	908	1362	2023	1897
WIPI1	protein-coding	chr17:68421281-68457524	-	hsa:55062	WD repeat domain, phosphoinositide interacting 1	0.891193	0.0216667	108	111	233	200
LINC01405	lncRNA	chr12:110936602-110937448	+	hsa:100131138	long intergenic non-protein coding RNA 1405	-4.14446	1.62668e-07	70	79	7	2
LOC646736	ncRNA	chr2:226142794-226180062	+	hsa:646736	uncharacterized LOC646736	-5.02043	0.00897443	9	23	1	0
TMC6	protein-coding	chr17:78112918-78125222	-	hsa:11322	transmembrane channel-like 6	0.868223	0.00247442	1032	1270	1931	2473
TMC5	protein-coding	chr16:19456450-19499113	+	hsa:79838	transmembrane channel-like 5	-1.06886	0.000642859	455	552	257	249
LOC105373024	lncRNA	chr22:37311492-37332126	-		uncharacterized LOC105373024	-2.73948	0.0163478	16	29	5	2
ONECUT1	protein-coding	chr15:52756963-52790012	-	hsa:3175	one cut homeobox 1	3.15806	0.00866353	4	1	19	30
HIST3H2BB	protein-coding	chr1:228458107-228458558	+	hsa:128312	histone cluster 3, H2bb	0.604368	0.0482326	2391	2699	3235	4898
SATB1	protein-coding	chr3:18345388-18425337	-	hsa:6304	SATB homeobox 1	-4.71954	3.34278e-09	72	106	2	5
CLDND1	protein-coding	chr3:98515473-98523066	-	hsa:56650	claudin domain containing 1	-1.21499	8.06743e-06	3436	4850	2159	1585
KSR2	protein-coding	chr12:117470335-117968558	-	hsa:283455	kinase suppressor of ras 2	-0.751015	0.0117882	634	982	558	442
TMIE	protein-coding	chr3:46701333-46710923	+	hsa:259236	transmembrane inner ear	1.95551	0.00709222	9	20	41	73
LINC01468	lncRNA	chr10:52450877-52455272	-	hsa:101928687	long intergenic non-protein coding RNA 1468	1.61266	0.0355397	17	11	62	32
CMTM7	protein-coding	chr3:32391825-32450408	+	hsa:112616	CKLF-like MARVEL transmembrane domain containing 7	0.790226	0.00641313	1805	2514	3270	4486
CMTM6	protein-coding	chr3:32481312-32502911	-	hsa:54918	CKLF-like MARVEL transmembrane domain containing 6	0.951131	0.00368345	1101	1624	3676	1869
SMIM19	protein-coding	chr8:42541622-42552997	+	hsa:114926	small integral membrane protein 19	-0.851649	0.0147439	259	309	167	165
SMIM20	protein-coding	chr4:25914192-25929879	+	hsa:389203	small integral membrane protein 20	-0.719755	0.0500738	199	280	174	131
PAF1	protein-coding	chr19:39385629-39391195	-	hsa:54623	Paf1, RNA polymerase II associated factor, homolog (S. cerevisiae)	0.615153	0.0248031	1392	1939	2448	2865
MTMR3	protein-coding	chr22:29883196-30030505	+	hsa:8897	myotubularin related protein 3	1.75085	0.0358133	8	12	33	37
MTMR6	protein-coding	chr13:25247232-25287512	-	hsa:9107	myotubularin related protein 6	0.869344	0.0164095	382	434	1085	512
LOC729683	ncRNA	chr17:63700338-63702685	+	hsa:729683	uncharacterized LOC729683	4.4165	0.029	1	0	9	14
PAG1	protein-coding	chr8:80967813-80995260	-	hsa:55824	phosphoprotein membrane anchor with glycosphingolipid microdomains 1	-2.37395	0.000281631	66	75	19	10
LOC100287453	pseudo	chr19:49042072-49042928	+		neurotrophin 4 pseudogene	3.55086	0.0421655	2	0	6	20
PALM	protein-coding	chr19:708953-748330	+	hsa:5064	paralemmin	0.818779	0.00909672	666	903	1152	1723
GGT5	protein-coding	chr22:24219654-24245078	-	hsa:2687	gamma-glutamyltransferase 5	4.80035	0.0117079	1	0	14	16
POMT1	protein-coding	chr9:131502928-131523799	+	hsa:10585	protein-O-mannosyltransferase 1	0.84007	0.0226808	131	181	250	331
PIP5K1C	protein-coding	chr19:3633437-3649945	-	hsa:23396	phosphatidylinositol-4-phosphate 5-kinase, type I, gamma	0.67629	0.020117	922	1244	1563	2042
PASK	protein-coding	chr2:241106099-241149481	-	hsa:23178	PAS domain containing serine/threonine kinase	-0.97003	0.00116789	658	895	473	360
PAX2	protein-coding	chr10:100732940-100829941	+	hsa:5076	paired box 2	1.20309	0.00569007	59	92	150	209
DLGAP1	protein-coding	chr18:3496032-3874253	-	hsa:9229	discs, large (Drosophila) homolog-associated protein 1	-5.67384	0.0121413	11	6	0	0
BZW2	protein-coding	chr7:16646134-16706523	+	hsa:28969	basic leucine zipper and W2 domains 2	-1.05765	6.88179e-05	2601	3346	1444	1551
ITGB1BP1	protein-coding	chr2:9406655-9423353	-	hsa:9270	integrin beta 1 binding protein 1	0.629033	0.0212669	921	1108	1614	1691
TNK2	protein-coding	chr3:195863364-195883281	-	hsa:10188	tyrosine kinase, non-receptor, 2	0.827992	0.0207678	272	270	404	615
LINC01315	lncRNA	chr22:42364400-42369208	-	hsa:102723775	long intergenic non-protein coding RNA 1315	-1.71313	0.00743356	42	93	23	19
TVP23C	protein-coding	chr17:15502264-15563631	-	hsa:201158	trans-golgi network vesicle protein 23 homolog C (S. cerevisiae)	1.99692	0.0256179	6	11	50	21
ABALON	lncRNA	chr20:31721507-31723409	+		apoptotic BCL2L1-antisense long non-coding RNA	2.13491	0.00324139	15	10	46	72
ANKRD46	protein-coding	chr8:100520772-100559748	-	hsa:157567	ankyrin repeat domain 46	-0.86595	0.0329157	136	203	105	89
TNS3	protein-coding	chr7:47275154-47537400	-	hsa:64759	tensin 3	1.17828	8.14439e-05	324	377	802	871
TNS4	protein-coding	chr17:40478307-40501681	-	hsa:84951	tensin 4	1.77882	4.40972e-10	1472	1654	4920	6386
TNS1	protein-coding	chr2:217799789-217846180	-	hsa:7145	tensin 1	1.23609	9.69273e-05	236	254	588	635
TNS2	protein-coding	chr12:53047273-53064372	+	hsa:23371	tensin like C1 domain containing phosphatase (tensin 2)	0.879577	0.0366878	96	106	157	234
MAP3K3	protein-coding	chr17:63622209-63693976	+	hsa:4215	mitogen-activated protein kinase kinase kinase 3	1.12624	0.0270931	47	41	104	102
MAP3K1	protein-coding	chr5:56816695-56894496	+	hsa:4214	mitogen-activated protein kinase kinase kinase 1, E3 ubiquitin protein ligase	1.10492	0.00152978	393	388	1180	632
HIVEP3	protein-coding	chr1:41847189-41918825	-	hsa:59269	human immunodeficiency virus type I enhancer binding protein 3	1.19885	0.00463816	55	90	176	169
MAP3K4	protein-coding	chr6:160991727-161117385	+	hsa:4216	mitogen-activated protein kinase kinase kinase 4	-0.68623	0.0242573	1007	1265	917	579
MAP3K5	protein-coding	chr6:136557966-136793097	-	hsa:4217	mitogen-activated protein kinase kinase kinase 5	1.37471	0.00160528	98	115	414	177
GALNT7	protein-coding	chr4:173168753-173323967	+	hsa:51809	polypeptide N-acetylgalactosaminyltransferase 7	0.773698	0.0484621	141	118	258	220
TOM1L2	protein-coding	chr17:17843508-17972406	-	hsa:146691	target of myb1-like 2 (chicken)	0.919413	0.00127275	565	791	1243	1428
VWA3A	protein-coding	chr16:22092538-22156966	+	hsa:146177	von Willebrand factor A domain containing 3A	5.33722	0.0256527	0	0	12	4
BEAN1	protein-coding	chr16:66476678-66482842	+	hsa:146227	brain expressed, associated with NEDD4, 1	3.30739	0.0368043	0	3	11	18
UBASH3B	protein-coding	chr11:122655690-122814473	+	hsa:84959	ubiquitin associated and SH3 domain containing B	1.20294	2.38276e-05	1516	1818	4901	3250
PDLIM2	protein-coding	chr8:22580474-22594298	+	hsa:64236	PDZ and LIM domain 2 (mystique)	1.89901	5.5659e-10	438	522	1565	2189
PDLIM1	protein-coding	chr10:95237568-95291148	-	hsa:9124	PDZ and LIM domain 1	1.21479	1.44003e-05	2004	2500	4775	6170
PDLIM7	protein-coding	chr5:177483394-177497601	-	hsa:9260	PDZ and LIM domain 7 (enigma)	1.13223	0.000117204	1696	2104	3604	5106
PDLIM5	protein-coding	chr4:94451942-94668223	+	hsa:10611	PDZ and LIM domain 5	0.914256	0.00229617	2455	3000	6908	4021
SARS2	protein-coding	chr19:38915264-38930896	-	hsa:54938	seryl-tRNA synthetase 2, mitochondrial	1.68158	0.0126278	15	34	123	40
LOC646762	ncRNA	chr7:29645922-29685138	-	hsa:646762	uncharacterized LOC646762	-0.961754	0.00510401	284	345	183	158
ANKRD10	protein-coding	chr13:110892692-110915107	-	hsa:55608	ankyrin repeat domain 10	-0.849018	0.00988732	942	1390	884	477
ANKRD22	protein-coding	chr10:88819899-88851975	-	hsa:118932	ankyrin repeat domain 22	-5.92443	1.34644e-08	58	119	3	0
ANKRD27	protein-coding	chr19:32597001-32675196	-	hsa:84079	ankyrin repeat domain 27 (VPS9 domain)	-0.61491	0.0325505	949	1474	929	719
DENND5B	protein-coding	chr12:31382223-31590442	-	hsa:160518	DENN/MADD domain containing 5B	0.909582	0.0451601	142	257	588	196
DENND6A	protein-coding	chr3:57625454-57693089	-	hsa:201627	DENN/MADD domain containing 6A	-0.650478	0.0499052	663	1175	762	453
DENND2A	protein-coding	chr7:140518418-140642209	-	hsa:27147	DENN/MADD domain containing 2A	6.25523	0.000120182	1	0	35	46
DDX55	protein-coding	chr12:123602091-123620943	+	hsa:57696	DEAD (Asp-Glu-Ala-Asp) box polypeptide 55	-0.871781	0.0111141	257	370	192	166
DDX3Y	protein-coding	chry:12903999-12920478	+	hsa:8653	DEAD (Asp-Glu-Ala-Asp) box helicase 3, Y-linked	-5.19481	0.0368412	5	8	0	0
TOP1	protein-coding	chr20:41028822-41124487	+	hsa:7150	topoisomerase (DNA) I	-1.09615	0.00980781	1712	1875	1408	407
LINC01220	lncRNA	chr14:75294404-75296410	+	hsa:731223	long intergenic non-protein coding RNA 1220	-2.34857	0.00232062	28	96	8	16
DDX24	protein-coding	chr14:94050922-94081212	-	hsa:57062	DEAD (Asp-Glu-Ala-Asp) box helicase 24	-2.16654	4.62675e-05	142	109	38	23
PCCA	protein-coding	chr13:100089015-100530437	+	hsa:5095	propionyl CoA carboxylase, alpha polypeptide	-1.12766	0.023411	84	136	65	40
DDX10	protein-coding	chr11:108665025-108940930	+	hsa:1662	DEAD (Asp-Glu-Ala-Asp) box polypeptide 10	-0.998779	0.0141079	246	252	175	93
LOC646471	ncRNA	chr1:25819954-25823606	-	hsa:646471	uncharacterized LOC646471	5.08728	0.044762	0	0	3	10
GDF11	protein-coding	chr12:55743280-55752881	+	hsa:10220	growth differentiation factor 11	0.764992	0.0378847	119	144	239	232
ACAD10	protein-coding	chr12:111686053-111757107	+	hsa:80724	acyl-CoA dehydrogenase family, member 10	-0.991671	0.00343411	340	420	182	219
CDKN2B-AS1	ncRNA	chr9:21994791-22077890	+	hsa:100048912	CDKN2B antisense RNA 1	2.30509	0.0379494	2	7	24	21
ROBO4	protein-coding	chr11:124884218-124897935	-	hsa:54538	roundabout, axon guidance receptor, homolog 4 (Drosophila)	6.06543	0.00316876	0	0	12	14
ROBO3	protein-coding	chr11:124868708-124881471	+	hsa:64221	roundabout, axon guidance receptor, homolog 3 (Drosophila)	0.732258	0.0190948	288	354	523	597
TPM1	protein-coding	chr15:63042639-63066093	+	hsa:7168	tropomyosin 1 (alpha)	0.651529	0.0332423	300	489	670	614
TPP2	protein-coding	chr13:102596936-102679174	+	hsa:7174	tripeptidyl peptidase II	-0.766644	0.0401884	549	583	489	227
LOC730268	protein-coding	chr2:87705863-87739249	+	hsa:730268	anaphase-promoting complex subunit 1-like	0.895695	0.0247527	80	113	205	171
LINC01124	ncRNA	chr2:170712439-170714567	-	hsa:440925	long intergenic non-protein coding RNA 1124	2.05614	0.0493708	4	7	18	29
TMEM184B	protein-coding	chr22:38219291-38272664	-	hsa:25829	transmembrane protein 184B	1.10877	0.000185173	1216	1600	2614	3712
DHCR24	protein-coding	chr1:54849627-54887248	-	hsa:1718	24-dehydrocholesterol reductase	0.626071	0.0277115	12000	13503	17664	23796
PDK4	protein-coding	chr7:95583497-95596613	-	hsa:5166	pyruvate dehydrogenase kinase, isozyme 4	-1.91267	0.00596479	55	50	17	13
PDP1	protein-coding	chr8:93916934-93926068	+	hsa:54704	pyruvate dehyrogenase phosphatase catalytic subunit 1	-0.713686	0.0183512	19750	23460	18018	10065
PDP2	protein-coding	chr16:66880480-66891101	+	hsa:57546	pyruvate dehyrogenase phosphatase catalytic subunit 2	-0.737073	0.0153237	568	786	490	363
IKBKAP	protein-coding	chr9:108868632-108934091	-	hsa:8518	inhibitor of kappa light polypeptide gene enhancer in B-cells, kinase complex-associated protein	-0.736341	0.0119147	1047	1524	953	664
MAP3K14	protein-coding	chr17:45263128-45317048	-	hsa:9020	mitogen-activated protein kinase kinase kinase 14	0.589732	0.0496874	338	411	605	583
CIITA	protein-coding	chr16:10866208-10916639	+	hsa:4261	class II, major histocompatibility complex, transactivator	5.34331	0.0244801	0	0	11	5
FAM180A	protein-coding	chr7:135729600-135748869	-	hsa:389558	family with sequence similarity 180, member A	-2.84117	0.0221179	10	47	8	0
C2CD4D	protein-coding	chr1:151837863-151840557	-	hsa:100191040	C2 calcium-dependent domain containing 4D	5.36692	0.00249102	1	0	18	26
LOC105373490	lncRNA	chr2:95637090-95641999	-		uncharacterized LOC105373490	5.73764	0.00883683	0	0	14	7
C2CD4C	protein-coding	chr19:405435-409128	-	hsa:126567	C2 calcium-dependent domain containing 4C	0.946422	0.0205245	97	100	177	225
CKMT1A	protein-coding	chr15:43692644-43695910	+	hsa:548596	creatine kinase, mitochondrial 1A	-2.44937	3.89381e-05	65	115	18	16
CKMT1B	protein-coding	chr15:43593834-43599406	+	hsa:1159	creatine kinase, mitochondrial 1B	-2.38612	9.82787e-09	229	274	42	59
RSRP1	protein-coding	chr1:25242237-25247519	-	hsa:57035	arginine/serine-rich protein 1	-1.2372	0.000141914	406	484	196	202
GM2A	protein-coding	chr5:151253052-151270394	+	hsa:2760	GM2 ganglioside activator	0.681982	0.0159545	1017	1389	1799	2222
FAM173A	protein-coding	chr16:721142-722590	+	hsa:65990	family with sequence similarity 173, member A	-0.802199	0.0424451	166	310	122	157
PER1	protein-coding	chr17:8140470-8152435	-	hsa:5187	period circadian clock 1	-0.933691	0.00433222	666	777	324	469
LOC284578	ncRNA	chr1:205554273-205556635	-	hsa:284578	uncharacterized LOC284578	5.38505	0.0232642	0	0	4	12
STARD13	protein-coding	chr13:33103135-33676835	-	hsa:90627	StAR-related lipid transfer (START) domain containing 13	0.858365	0.0251453	121	157	330	203
PEX5	protein-coding	chr12:7189650-7211483	+	hsa:5830	peroxisomal biogenesis factor 5	-0.606837	0.030018	1036	1349	784	856
TSEN2	protein-coding	chr3:12484432-12533321	+	hsa:80746	TSEN2 tRNA splicing endonuclease subunit	-1.04403	0.00489828	217	255	127	115
CD300C	protein-coding	chr17:74534359-74546166	-	hsa:10871	CD300c molecule	4.42745	0.0302146	1	0	6	17
TRNE	tRNA	chrmt:14674-14742	-	hsa:4556	tRNA	-1.4006	0.0215895	56	69	28	22
PFAS	protein-coding	chr17:8249255-8267419	+	hsa:5198	phosphoribosylformylglycinamidine synthase	-1.20602	3.34398e-05	784	981	395	409
GLI2	protein-coding	chr2:120866789-120991265	+	hsa:2736	GLI family zinc finger 2	1.96244	1.49228e-09	141	184	601	723
CREB3	protein-coding	chr9:35732320-35737008	+	hsa:10488	cAMP responsive element binding protein 3	1.08856	0.000260168	363	480	859	1014
PFKM	protein-coding	chr12:48106118-48146104	+	hsa:5213	phosphofructokinase, muscle	-1.12054	0.00123807	266	367	164	141
MFSD13A	protein-coding					-0.888351	0.00441907	1570	2203	836	1276
FAM161B	protein-coding	chr14:73932031-73950215	-	hsa:145483	family with sequence similarity 161, member B	1.05841	0.0294366	43	56	120	97
KLF10	protein-coding	chr8:102648777-102655902	-	hsa:7071	Kruppel-like factor 10	-0.774964	0.00429929	2157	3119	1816	1410
FAM162A	protein-coding	chr3:122384176-122410114	+	hsa:26355	family with sequence similarity 162, member A	-1.31701	6.54138e-06	804	992	369	389
MPDU1	protein-coding	chr17:7583848-7588205	+	hsa:9526	mannose-P-dolichol utilization defect 1	0.618379	0.0373051	1585	1993	2364	3374
KLRC4-KLRK1	protein-coding	chr12:10372353-10410146	-	hsa:100528032	KLRC4-KLRK1 readthrough	-4.49035	0.00295294	23	18	2	0
HDAC11	protein-coding	chr3:13480344-13506424	+	hsa:79885	histone deacetylase 11	0.627902	0.0471851	233	317	444	445
ARRB1	protein-coding	chr11:75260122-75312108	-	hsa:408	arrestin, beta 1	0.589091	0.0296175	944	1248	1685	1767
BIRC3	protein-coding	chr11:102317484-102337734	+	hsa:330	baculoviral IAP repeat containing 3	-1.46363	0.0439664	41	75	35	9
SOAT2	protein-coding	chr12:53102437-53124535	+	hsa:8435	sterol O-acyltransferase 2	4.19696	0.00808061	0	2	22	15
NTNG2	protein-coding	chr9:132162609-132244531	+	hsa:84628	netrin G2	1.53378	0.0138113	22	24	55	85
KCNS3	protein-coding	chr2:17878667-17932961	+	hsa:3790	potassium voltage-gated channel, delayed-rectifier, subfamily S, member 3	0.765534	0.021847	186	241	357	403
KLHL5	protein-coding	chr4:39044796-39143101	+	hsa:51088	kelch-like family member 5	1.06314	0.00126846	251	292	731	476
LOC107985092	lncRNA					-2.09126	0.0113219	49	39	5	17
APOBEC3C	protein-coding	chr22:39014260-39018838	+	hsa:27350	apolipoprotein B mRNA editing enzyme, catalytic polypeptide-like 3C	1.10533	4.12742e-05	963	1304	2442	2653
APOBEC3D	protein-coding	chr22:39021113-39034328	+	hsa:140564	apolipoprotein B mRNA editing enzyme, catalytic polypeptide-like 3D	1.20279	3.07675e-05	602	853	1559	1922
APOBEC3G	protein-coding	chr22:39077005-39087743	+	hsa:60489	apolipoprotein B mRNA editing enzyme, catalytic polypeptide-like 3G	4.71544	3.10452e-11	1	9	134	132
PGM2	protein-coding	chr4:37826660-37862938	+	hsa:55276	phosphoglucomutase 2	-0.86698	0.0146983	409	585	373	201
MYBL1	protein-coding	chr8:66562175-66613249	-	hsa:4603	v-myb avian myeloblastosis viral oncogene homolog-like 1	1.78015	3.93806e-05	105	179	746	277
KLHDC8B	protein-coding	chr3:49171120-49176487	+	hsa:200942	kelch domain containing 8B	1.29273	0.000152323	195	232	459	638
OSBPL3	protein-coding	chr7:24820218-24980199	-	hsa:26031	oxysterol binding protein-like 3	0.834681	0.00384414	1027	1360	2702	1790
CALU	protein-coding	chr7:128739292-128773423	+	hsa:813	calumenin	0.63269	0.0289209	982	1401	2320	1559
TTC9	protein-coding	chr14:70641787-70675360	+	hsa:23508	tetratricopeptide repeat domain 9	1.19463	0.00147371	96	195	386	298
CAPS	protein-coding	chr19:5913644-5916211	+	hsa:828	calcyphosine	3.62902	1.76675e-08	5	13	95	132
KCND3	protein-coding	chr1:111972414-111989327	-	hsa:3752	potassium voltage-gated channel, Shal-related subfamily, member 3	1.96998	0.0250067	15	6	72	21
CAST	protein-coding	chr5:96662249-96773236	+	hsa:831	calpastatin	1.50783	0.020876	37	15	103	63
TTF2	protein-coding	chr1:117060288-117107453	+	hsa:8458	transcription termination factor, RNA polymerase II	-0.606191	0.0460764	736	895	675	461
GNAZ	protein-coding	chr22:23095298-23125037	+	hsa:2781	guanine nucleotide binding protein (G protein), alpha z polypeptide	-0.591597	0.0453805	536	781	468	443
TTI1	protein-coding	chr20:37983007-38033468	-	hsa:9675	TELO2 interacting protein 1	-0.625582	0.0240554	1193	1572	892	983
NPAS2	protein-coding	chr2:100821025-100996829	+	hsa:4862	neuronal PAS domain protein 2	1.01917	0.00181042	179	216	430	414
CEBPD	protein-coding	chr8:47736914-47738164	-	hsa:1052	CCAAT/enhancer binding protein (C/EBP), delta	-1.22959	0.0312348	79	94	25	52
KCNK3	protein-coding	chr2:26724487-26733420	+	hsa:3777	potassium channel, subfamily K, member 3	1.76359	0.0109999	19	14	46	74
LINC01515	lncRNA	chr10:65571425-65766541	+	hsa:101928913	long intergenic non-protein coding RNA 1515	-1.79147	0.0274026	36	35	13	9
UBE2E3	protein-coding	chr2:180980381-180992673	+	hsa:10477	ubiquitin-conjugating enzyme E2E 3	0.600805	0.0290017	909	1279	1645	1812
UBE2D4	protein-coding	chr7:43926441-43956133	+	hsa:51619	ubiquitin-conjugating enzyme E2D 4 (putative)	-0.990894	0.00520059	268	523	200	207
RPARP-AS1	lncRNA	chr10:102449817-102456293	+	hsa:100505761	RPARP antisense RNA 1	-1.57107	0.000289155	168	183	75	51
RPL32P29	pseudo	chr14:49577355-49577842	-		ribosomal protein L32 pseudogene 29	-0.583036	0.0406724	739	982	596	607
MYADM	protein-coding	chr19:53868545-53876435	+	hsa:91663	myeloid-associated differentiation marker	2.16255	2.91599e-13	3538	4705	15395	22985
KIAA0226L	protein-coding	chr13:46342000-46387500	-	hsa:80183	KIAA0226-like	1.60551	0.00852765	22	22	66	76
ROGDI	protein-coding	chr16:4796967-4802633	-	hsa:79641	rogdi homolog (Drosophila)	0.739224	0.0391467	271	281	382	591
UBE2Q2	protein-coding	chr15:75843486-75901047	+	hsa:92912	ubiquitin-conjugating enzyme E2Q family member 2	0.773411	0.0287564	168	242	448	288
CBLB	protein-coding	chr3:105655461-105868420	-	hsa:868	Cbl proto-oncogene B, E3 ubiquitin protein ligase	-0.993605	0.00714506	198	276	130	119
CD24	protein-coding	chr6:106969831-106974039	-	hsa:100133941	CD24 molecule	1.36763	0.000289912	111	219	545	334
CD47	protein-coding	chr3:108043094-108091088	-	hsa:961	CD47 molecule	-0.918967	0.00412784	580	791	467	297
CBR3	protein-coding	chr21:36134965-36146562	+	hsa:874	carbonyl reductase 3	2.3731	2.9686e-06	20	32	127	152
CD68	protein-coding	chr17:7579487-7582111	+	hsa:968	CD68 molecule	-0.854088	0.0208314	276	281	145	182
CD59	protein-coding	chr11:33703010-33736479	-	hsa:966	CD59 molecule, complement regulatory protein	1.40283	8.95354e-08	2815	3713	8495	9555
CD63	protein-coding	chr12:55725443-55728977	-	hsa:967	CD63 molecule	0.889025	0.0016321	4577	5897	8622	11628
DRAP1	protein-coding	chr11:65919257-65921577	+	hsa:10589	DR1-associated protein 1 (negative cofactor 2 alpha)	0.941127	0.000796958	1520	2124	3209	4065
LOC105373077	lncRNA	chr22:46734612-46736851	-		uncharacterized LOC105373077	1.72485	0.0406065	12	8	42	30
CD82	protein-coding	chr11:44565591-44619789	+	hsa:3732	CD82 molecule	0.884687	0.0169238	117	138	238	258
TUFM	protein-coding	chr16:28842787-28859562	-	hsa:7284	Tu translation elongation factor, mitochondrial	-0.785337	0.00628469	4746	5334	2637	3525
CBX4	protein-coding	chr17:79833156-79839414	-	hsa:8535	chromobox homolog 4	0.60481	0.0270762	1047	1300	1777	1971
ANKRD13A	protein-coding	chr12:109999182-110039432	+	hsa:88455	ankyrin repeat domain 13A	0.799299	0.00559775	469	642	1139	891
ANKRD13B	protein-coding	chr17:29593578-29612728	+	hsa:124930	ankyrin repeat domain 13B	-0.897513	0.00571171	397	444	238	240
YBX3	protein-coding	chr12:10699084-10723448	-	hsa:8531	Y box binding protein 3	-1.0092	0.000142708	3854	5936	2747	2314
HOXC10	protein-coding	chr12:53985162-53990279	+	hsa:3226	homeobox C10	1.1421	0.0260996	30	70	105	119
TUT1	protein-coding	chr11:62575045-62591637	-	hsa:64852	terminal uridylyl transferase 1, U6 snRNA-specific	-0.649202	0.0279992	781	880	528	591
PIGQ	protein-coding	chr16:569968-584136	+	hsa:9091	phosphatidylinositol glycan anchor biosynthesis, class Q	0.746525	0.0462788	136	190	236	332
PIGY	protein-coding	chr4:88520978-88523801	-	hsa:84992	phosphatidylinositol glycan anchor biosynthesis, class Y	-0.931174	0.00271397	440	580	302	260
HDDC2	protein-coding	chr6:125274934-125302141	-	hsa:51020	HD domain containing 2	-0.583153	0.0373502	1120	1529	867	978
CCM2	protein-coding	chr7:45026570-45071743	+	hsa:83605	cerebral cavernous malformation 2	0.664673	0.0371151	443	483	661	888
CCNJ	protein-coding	chr10:96043402-96060870	+	hsa:54619	cyclin J	-0.886545	0.0392523	283	397	285	105
TRABD2A	protein-coding	chr2:84821650-84881975	-	hsa:129293	TraB domain containing 2A	1.35547	0.0103682	35	35	103	88
TRABD2B	protein-coding	chr1:47760545-47819729	-	hsa:388630	TraB domain containing 2B	6.10938	0.000202815	1	0	43	31
AAED1	protein-coding	chr9:96641251-96655331	-	hsa:195827	AhpC/TSA antioxidant enzyme domain containing 1	0.752331	0.036377	170	290	497	309
GPAM	protein-coding	chr10:112149865-112215395	-	hsa:57678	glycerol-3-phosphate acyltransferase, mitochondrial	-0.752236	0.0280863	660	889	641	332
GPC1	protein-coding	chr2:240456277-240468076	+	hsa:2817	glypican 1	1.25462	0.000678508	198	256	410	716
GPC4	protein-coding	chrx:133301036-133415177	-	hsa:2239	glypican 4	0.66112	0.0185176	540	768	1090	1068
HUWE1	protein-coding	chrx:53532790-53651942	-	hsa:10075	HECT, UBA and WWE domain containing 1, E3 ubiquitin protein ligase	-0.7685	0.003283	5427	7258	4383	3446
LOC101928841	protein-coding	chr13:113399610-113414393	-	hsa:101928841	collagen alpha-1(II) chain-like	2.22963	0.00544333	10	8	37	53
SOCS3	protein-coding	chr17:78356777-78360079	-	hsa:9021	suppressor of cytokine signaling 3	1.04546	0.000150144	761	981	1779	1987
EIF4B	protein-coding	chr12:53006258-53042209	+	hsa:1975	eukaryotic translation initiation factor 4B	-0.744741	0.00787877	16142	24458	15216	10125
PRICKLE1	protein-coding	chr12:42458350-42589283	-	hsa:144165	prickle homolog 1 (Drosophila)	1.36051	0.000540116	83	112	322	206
MCCC2	protein-coding	chr5:71587288-71658704	+	hsa:64087	methylcrotonoyl-CoA carboxylase 2 (beta)	-0.657811	0.0153514	1218	1610	997	885
MTURN	protein-coding	chr7:30134936-30162765	+	hsa:222166	maturin, neural progenitor differentiation regulator homolog (Xenopus)	-0.78655	0.0166463	321	433	253	206
MTUS1	protein-coding	chr8:17643794-17722575	-	hsa:57509	microtubule associated tumor suppressor 1	-1.25987	0.00131435	862	1254	683	252
CRIP1	protein-coding	chr14:105486920-105488789	+	hsa:1396	cysteine-rich protein 1 (intestinal)	1.36921	7.75867e-06	913	1236	2309	3458
CRIP2	protein-coding	chr14:105474775-105480170	+	hsa:1397	cysteine-rich protein 2	1.65201	9.67343e-08	354	541	1229	1676
KLK10	protein-coding	chr19:51012744-51020026	-	hsa:5655	kallikrein-related peptidase 10	1.1081	0.000714071	342	459	719	1076
GPS2	protein-coding	chr17:7312659-7315339	-	hsa:2874	G protein pathway suppressor 2	0.726465	0.0119151	850	990	1433	1771
CRIM1	protein-coding	chr2:36356088-36551047	+	hsa:51232	cysteine rich transmembrane BMP regulator 1 (chordin-like)	1.7344	1.04745e-09	1022	1133	4507	3140
GPX2	protein-coding	chr14:64939152-64942905	-	hsa:2877	glutathione peroxidase 2 (gastrointestinal)	5.39098	0.0241644	0	0	3	13
GPX8	protein-coding	chr5:55160155-55167297	+	hsa:493869	glutathione peroxidase 8 (putative)	0.81975	0.00317658	817	1078	2003	1519
CDK6	protein-coding	chr7:92604921-92833917	-	hsa:1021	cyclin-dependent kinase 6	0.917365	0.0177923	2309	2804	7710	2644
CDK5	protein-coding	chr7:151053812-151057965	-	hsa:1020	cyclin-dependent kinase 5	0.712957	0.0135863	535	617	958	1035
SAP30BP	protein-coding	chr17:75667116-75708062	+	hsa:29115	SAP30 binding protein	0.59675	0.0265682	1888	2302	3117	3542
LOC100505501	unknown	chr8:59119836-59121347	+	hsa:100505501	uncharacterized LOC100505501	-5.18251	0.0465956	1	13	0	0
HAS2-AS1	ncRNA	chr8:121639346-121645325	+	hsa:594842	HAS2 antisense RNA 1	3.04684	0.00639423	3	3	34	19
CDS1	protein-coding	chr4:84582908-84651334	+	hsa:1040	CDP-diacylglycerol synthase (phosphatidate cytidylyltransferase) 1	-0.853652	0.0423496	198	379	225	106
LOC101928741	ncRNA	chr5:66205123-66209912	-	hsa:101928741	uncharacterized LOC101928741	2.65189	0.0200377	2	5	22	23
ANXA10	protein-coding	chr4:168092525-168187690	+	hsa:11199	annexin A10	-8.05467	1.18033e-06	27	70	0	0
PKIB	protein-coding	chr6:122471917-122726373	+	hsa:5570	protein kinase (cAMP-dependent, catalytic) inhibitor beta	-3.32959	6.30282e-19	507	598	76	41
NFATC2	protein-coding	chr20:51386957-51542719	-	hsa:4773	nuclear factor of activated T-cells, cytoplasmic, calcineurin-dependent 2	1.29546	0.000121369	144	181	474	368
MYH15	protein-coding	chr3:108381244-108549462	-	hsa:22989	myosin, heavy chain 15	-2.52766	3.57035e-06	113	178	39	14
GRB7	protein-coding	chr17:39738182-39747285	+	hsa:2886	growth factor receptor-bound protein 7	-0.862824	0.00415205	1329	1513	702	943
PLAT	protein-coding	chr8:42174718-42207724	-	hsa:5327	plasminogen activator, tissue	0.710951	0.0281151	209	266	445	374
PLD1	protein-coding	chr3:171600404-171771359	-	hsa:5337	phospholipase D1, phosphatidylcholine-specific	1.01183	0.0158764	116	164	412	185
ST6GAL1	protein-coding	chr3:186974994-187078553	+	hsa:6480	ST6 beta-galactosamide alpha-2,6-sialyltranferase 1	-1.10253	0.00018811	1114	1349	534	670
PLEC	protein-coding	chr8:143915153-143942636	-	hsa:5339	plectin	0.793893	0.00579702	3261	3784	5434	7403
MCFD2	protein-coding	chr2:46901870-46915868	-	hsa:90411	multiple coagulation factor deficiency 2	0.909015	0.00217514	1249	1722	3643	2236
MAMDC2	protein-coding	chr9:70043581-70226972	+	hsa:256691	MAM domain containing 2	2.9576	0.000454973	1	16	79	51
PLK2	protein-coding	chr5:58453982-58460139	-	hsa:10769	polo-like kinase 2	1.78539	1.89618e-09	729	935	3750	2322
GRPR	protein-coding	chrx:16123301-16153518	+	hsa:2925	gastrin-releasing peptide receptor	2.79689	0.0221014	1	5	23	19
PKNOX1	protein-coding	chr21:42974510-43033582	+	hsa:5316	PBX/knotted 1 homeobox 1	0.642555	0.0310829	359	494	774	623
MYEOV	protein-coding	chr11:69294138-69297287	+	hsa:26579	myeloma overexpressed	0.635923	0.0312448	3194	3627	4596	6551
TICAM1	protein-coding	chr19:4815924-4831742	-	hsa:148022	toll-like receptor adaptor molecule 1	0.679352	0.0326311	648	785	959	1442
CRLF1	protein-coding	chr19:18593237-18602289	-	hsa:9244	cytokine receptor-like factor 1	1.47007	1.93915e-06	622	638	1564	2133
EIF1AD	protein-coding	chr11:65996545-66002166	-	hsa:84285	eukaryotic translation initiation factor 1A domain containing	0.594324	0.0382207	1654	1906	2462	3194
MAPKAPK5-AS1	ncRNA	chr12:111839769-111842902	-	hsa:51275	MAPKAPK5 antisense RNA 1	-1.58404	9.73972e-07	530	640	185	225
CGB2	protein-coding	chr19:49031912-49033238	+	hsa:114336	chorionic gonadotropin, beta polypeptide 2	1.67924	0.00119905	32	54	98	184
TFDP2	protein-coding	chr3:141944428-142149537	-	hsa:7029	transcription factor Dp-2 (E2F dimerization partner 2)	-0.738239	0.0317663	672	929	671	343
PAPSS2	protein-coding	chr10:87659719-87747705	+	hsa:9060	3'-phosphoadenosine 5'-phosphosulfate synthase 2	0.937574	0.00430598	299	388	865	527
IGFBP6	protein-coding	chr12:53097652-53102344	+	hsa:3489	insulin-like growth factor binding protein 6	2.70925	1.65995e-20	808	976	5127	7098
PTHLH	protein-coding	chr12:27958084-27969961	-	hsa:5744	parathyroid hormone-like hormone	4.07832	0.00848507	1	1	23	13
FMNL3	protein-coding	chr12:49636499-49706515	-	hsa:91010	formin-like 3	2.33987	9.46336e-14	145	182	797	938
AP1S3	protein-coding	chr2:223755330-223837602	-	hsa:130340	adaptor-related protein complex 1, sigma 3 subunit	-0.803009	0.0122679	1955	2793	1877	991
AQP7P3	pseudo	chr9:65877574-65912560	+	hsa:441432	aquaporin 7 pseudogene 3	-4.77082	0.0154098	12	14	0	1
AQP7P1	pseudo	chr9:63315243-63334520	-	hsa:375719	aquaporin 7 pseudogene 1	-5.93926	0.000549438	30	27	1	0
AP1S2	protein-coding	chrx:15825808-15854966	-	hsa:8905	adaptor-related protein complex 1, sigma 2 subunit	0.8393	0.0407839	124	172	378	182
PTGS1	protein-coding	chr9:122371005-122395703	+	hsa:5742	prostaglandin-endoperoxide synthase 1 (prostaglandin G/H synthase and cyclooxygenase)	-1.6621	0.00443003	58	104	32	21
SEC31B	protein-coding	chr10:100486646-100519838	-	hsa:25956	SEC31 homolog B (S. cerevisiae)	-1.19636	0.0166805	75	139	49	47
LAT2	protein-coding	chr7:74209757-74229834	+	hsa:7462	linker for activation of T cells family, member 2	0.937102	0.00485432	216	339	477	620
PTGR2	protein-coding	chr14:73851844-73885465	+	hsa:145482	prostaglandin reductase 2	-1.06475	0.0186112	153	146	96	58
LARS	protein-coding	chr5:146113039-146182787	-	hsa:51520	leucyl-tRNA synthetase	-1.21666	0.000526911	902	957	574	286
BACH2	protein-coding	chr6:89926528-90296912	-	hsa:60468	BTB and CNC homology 1, basic leucine zipper transcription factor 2	-1.1318	0.0260483	130	114	82	39
CHD7	protein-coding	chr8:60678744-60866981	+	hsa:55636	chromodomain helicase DNA binding protein 7	-0.753645	0.0118457	839	1001	681	477
CHD5	protein-coding	chr1:6101787-6180134	-	hsa:26038	chromodomain helicase DNA binding protein 5	1.42432	0.000167362	98	145	279	396
CHD4	protein-coding	chr12:6570082-6607433	-	hsa:1108	chromodomain helicase DNA binding protein 4	-0.949975	0.0065444	1399	1644	1156	529
VEZF1	protein-coding	chr17:57971547-57988233	-	hsa:7716	vascular endothelial zinc finger 1	0.720615	0.0339609	1192	1487	3202	1501
MGST1	protein-coding	chr12:16347652-16376179	+	hsa:4257	microsomal glutathione S-transferase 1	-0.819258	0.00286973	1717	2792	1365	1280
SOGA1	protein-coding	chr20:36777442-36863684	-	hsa:140710	suppressor of glucose, autophagy associated 1	0.619909	0.0216235	1166	1541	2080	2272
NTSR1	protein-coding	chr20:62708837-62762771	+	hsa:4923	neurotensin receptor 1 (high affinity)	-0.613215	0.036521	1320	1628	875	1144
PRDM15	protein-coding	chr21:41798225-41879342	-	hsa:63977	PR domain containing 15	-0.729126	0.0333322	263	335	207	173
LOC100505938	ncRNA	chr7:8262225-8343281	+	hsa:100505938	uncharacterized LOC100505938	-1.55116	0.0173043	57	56	18	23
ZMYM2	protein-coding	chr13:19958708-20091845	+	hsa:7750	zinc finger, MYM-type 2	-0.730329	0.0220882	580	1006	588	403
DIMT1	protein-coding	chr5:62388523-62403939	-	hsa:27292	DIM1 dimethyladenosine transferase 1 homolog (S. cerevisiae)	-0.783724	0.00535454	852	1125	642	564
CHRD	protein-coding	chr3:184380073-184389835	+	hsa:8646	chordin	1.8217	2.4169e-06	59	89	266	278
KCTD5	protein-coding	chr16:2682494-2709030	+	hsa:54442	potassium channel tetramerization domain containing 5	0.657016	0.0174721	1084	1336	1858	2148
PTH1R	protein-coding	chr3:46877746-46903799	+	hsa:5745	parathyroid hormone 1 receptor	2.47663	0.000922353	9	10	45	66
CIB2	protein-coding	chr15:78104649-78131266	-	hsa:10518	calcium and integrin binding family member 2	1.04266	0.00110032	537	547	985	1380
PIP4K2A	protein-coding	chr10:22534854-22713275	-	hsa:5305	phosphatidylinositol-5-phosphate 4-kinase, type II, alpha	0.687357	0.0245955	777	1216	2066	1288
POLI	protein-coding	chr18:54269498-54311379	+	hsa:11201	polymerase (DNA directed) iota	-1.03612	0.0442782	197	223	175	46
POLK	protein-coding	chr5:75511832-75602576	+	hsa:51426	polymerase (DNA directed) kappa	5.39913	0.0417452	0	0	17	0
PDGFRB	protein-coding	chr5:150113839-150155884	-	hsa:5159	platelet-derived growth factor receptor, beta polypeptide	1.94377	0.0271594	11	6	29	42
ALOX15	protein-coding	chr17:4630919-4641665	-	hsa:246	arachidonate 15-lipoxygenase	3.67565	0.00116796	5	0	31	41
PON2	protein-coding	chr7:95404862-95435028	-	hsa:5445	paraoxonase 2	-0.745124	0.0170114	438	670	384	305
SHISA4	protein-coding	chr1:201888677-201892587	+	hsa:149345	shisa family member 4	0.869374	0.0116816	175	271	367	475
SHISA5	protein-coding	chr3:48467798-48504814	-	hsa:51246	shisa family member 5	0.588482	0.0389987	2651	3153	3929	5232
LCN2	protein-coding	chr9:128149430-128153455	+	hsa:3934	lipocalin 2	2.12408	0.0238521	5	8	31	28
MYL6B	protein-coding	chr12:56152420-56157987	+	hsa:140465	myosin, light chain 6B, alkali, smooth muscle and non-muscle	0.768352	0.00912625	972	1221	1660	2246
PLA2G4A	protein-coding	chr1:186828900-186988981	+	hsa:5321	phospholipase A2, group IVA (cytosolic, calcium-dependent)	-5.3063	5.09344e-15	129	218	2	7
LOC100133920	pseudo	chr2:94575976-94587183	-	hsa:100133920	uncharacterized LOC100133920	-5.45403	0.0203934	8	7	0	0
PPA1	protein-coding	chr10:70202830-70233434	-	hsa:5464	pyrophosphatase (inorganic) 1	-0.611086	0.019218	3427	4877	3086	2600
PPA2	protein-coding	chr4:105369077-105474070	-	hsa:27068	pyrophosphatase (inorganic) 2	-0.754638	0.0177924	381	632	321	300
LCTL	protein-coding	chr15:66547468-66565979	-	hsa:197021	lactase-like	4.8264	3.54957e-06	0	4	64	51
LYPD3	protein-coding	chr19:43460794-43465679	-	hsa:27076	LY6/PLAUR domain containing 3	1.46695	7.57792e-06	174	246	535	672
AP3S1	protein-coding	chr5:115841606-115912189	+	hsa:1176	adaptor-related protein complex 3, sigma 1 subunit	-1.72735	1.89818e-10	2396	3663	1035	870
LDAH	protein-coding	chr2:20684024-20823139	-	hsa:60526	chromosome 2 open reading frame 43	-0.826242	0.00873864	408	659	331	293
SH2B2	protein-coding	chr7:102284528-102321711	+	hsa:10603	SH2B adaptor protein 2	-2.04923	0.00960466	33	56	7	15
LDHB	protein-coding	chr12:21635342-21657794	-	hsa:3945	lactate dehydrogenase B	-0.601226	0.0246573	8110	12173	7970	5993
LDLR	protein-coding	chr19:11089362-11133830	+	hsa:3949	low density lipoprotein receptor	0.963327	0.000332021	1512	1887	3270	3685
GOLT1A	protein-coding	chr1:204198160-204214092	-	hsa:127845	golgi transport 1A	-1.59044	0.0331628	47	44	10	22
HSP90AB1	protein-coding	chr6:44246166-44253888	+	hsa:3326	heat shock protein 90kDa alpha (cytosolic), class B member 1	-1.06401	0.000261331	58437	74889	42421	25143
SEMA3B-AS1	ncRNA	chr3:50266641-50267371	-	hsa:101928931	SEMA3B antisense RNA 1 (head to head)	6.4572	0.000845191	0	0	14	20
BAIAP2-AS1	ncRNA	chr17:81029133-81034719	-	hsa:440465	BAIAP2 antisense RNA 1 (head to head)	0.65136	0.0434105	207	282	427	378
FDX1L	protein-coding	chr19:10310211-10316015	-	hsa:112812	ferredoxin 1-like	0.83321	0.0127883	412	485	653	1021
FER1L4	pseudo	chr20:35558737-35607562	-	hsa:80307	fer-1-like family member 4, pseudogene (functional)	-2.38967	0.000206018	52	96	14	15
GDPD1	protein-coding	chr17:59220467-59275970	+	hsa:284161	glycerophosphodiester phosphodiesterase domain containing 1	-0.779988	0.048855	175	248	160	99
UFD1L	protein-coding	chr22:19449941-19479215	-	hsa:7353	ubiquitin fusion degradation 1 like (yeast)	0.704772	0.00882522	1835	2349	3318	3824
POMZP3	protein-coding	chr7:76609986-76627303	-	hsa:22932	POM121 and ZP3 fusion	1.46162	0.00669306	28	37	84	103
HMCN1	protein-coding	chr1:185734551-186190953	+	hsa:83872	hemicentin 1	1.99492	0.000160574	44	31	223	105
IGSF11	protein-coding	chr3:118900630-119146068	-	hsa:152404	immunoglobulin superfamily, member 11	-4.55127	0.0370991	1	24	0	1
YKT6	protein-coding	chr7:44200978-44214294	+	hsa:10652	YKT6 v-SNARE homolog (S. cerevisiae)	0.603205	0.0327379	2915	3190	4326	5471
WNT3A	protein-coding	chr1:228007022-228061271	+	hsa:89780	wingless-type MMTV integration site family, member 3A	1.98292	2.0275e-06	67	75	226	363
ASB13	protein-coding	chr10:5638857-5666595	-	hsa:79754	ankyrin repeat and SOCS box containing 13	-0.766278	0.0112161	636	688	411	415
OSGEPL1-AS1	ncRNA	chr2:189762780-189765556	+	hsa:101409258	OSGEPL1 antisense RNA 1	-5.63324	0.0129306	9	8	0	0
WNT11	protein-coding	chr11:76186396-76210842	-	hsa:7481	wingless-type MMTV integration site family, member 11	2.77428	2.86294e-06	7	37	143	155
WNT16	protein-coding	chr7:121329036-121341104	+	hsa:51384	wingless-type MMTV integration site family, member 16	-0.825802	0.0219148	1313	1315	1105	498
ZSCAN20	protein-coding	chr1:33472651-33504253	+	hsa:7579	zinc finger and SCAN domain containing 20	-0.605503	0.0415965	621	783	549	425
PRF1	protein-coding	chr10:70597348-70602775	-	hsa:5551	perforin 1 (pore forming protein)	2.55518	5.58943e-20	1264	1338	7369	8834
LOC105379111	lncRNA	chr5:104972300-104979775	-		uncharacterized LOC105379111	5.25222	0.0298995	0	0	10	5
LYRM1	protein-coding	chr16:20899868-20925006	+	hsa:57149	LYR motif containing 1	0.717494	0.00910965	804	1022	1757	1409
ZNF219	protein-coding	chr14:21090046-21099014	-	hsa:51222	zinc finger protein 219	0.789098	0.0390877	193	308	318	570
ZNF217	protein-coding	chr20:53567065-53594265	-	hsa:7764	zinc finger protein 217	0.87215	0.0107153	985	1259	2979	1390
HMGA2	protein-coding	chr12:65824460-65915527	+	hsa:8091	high mobility group AT-hook 2	-1.04338	0.00405057	274	354	196	126
MPRIP	protein-coding	chr17:17042455-17192647	+	hsa:23164	myosin phosphatase Rho interacting protein	0.711732	0.00760898	2336	2582	4165	4366
LOC105369758	lncRNA	chr12:49009309-49019240	+		uncharacterized LOC105369758	-1.30194	0.0281427	57	108	23	45
LOC107984740	lncRNA					5.29035	0.0285622	0	0	4	11
DISP2	protein-coding	chr15:40354359-40378755	+	hsa:85455	dispatched homolog 2 (Drosophila)	1.0257	0.00880606	114	130	215	307
PTTG1IP	protein-coding	chr21:44849585-44873903	-	hsa:754	pituitary tumor-transforming 1 interacting protein	0.920843	0.000339714	2851	3758	6470	6636
CLN6	protein-coding	chr15:68206992-68229742	-	hsa:54982	ceroid-lipofuscinosis, neuronal 6, late infantile, variant	0.622423	0.0390954	807	802	1185	1449
PACRGL	protein-coding	chr4:20700413-20732559	+	hsa:133015	PARK2 co-regulated-like	-0.888378	0.0187925	174	293	138	123
CLMP	protein-coding	chr11:123072006-123195305	-	hsa:79827	CXADR-like membrane protein	1.4386	0.0312891	26	16	76	49
PMEPA1	protein-coding	chr20:57648392-57711536	-	hsa:56937	prostate transmembrane protein, androgen induced 1	4.36634	2.95777e-17	5	23	319	266
CLPX	protein-coding	chr15:65148219-65185420	-	hsa:10845	caseinolytic mitochondrial matrix peptidase chaperone subunit	-0.721708	0.0307948	668	849	630	346
NCEH1	protein-coding	chr3:172630645-172711218	-	hsa:57552	neutral cholesterol ester hydrolase 1	1.19058	0.000671793	366	398	1239	632
CLTB	protein-coding	chr5:176392455-176416569	-	hsa:1212	clathrin, light chain B	0.929405	0.00314739	631	797	1137	1701
SLC12A4	protein-coding	chr16:67943474-67968694	-	hsa:6560	solute carrier family 12 (potassium/chloride transporter), member 4	0.988942	0.00114001	800	909	1491	2077
LOC105379051	lncRNA	chr5:82919381-82923401	-		uncharacterized LOC105379051	-0.804136	0.0116347	360	510	278	243
KLRC2	protein-coding	chr12:10430599-10435993	-	hsa:3822	killer cell lectin-like receptor subfamily C, member 2	-2.45541	0.0015241	48	49	13	6
KLRC3	protein-coding	chr12:10412315-10420595	-	hsa:3823	killer cell lectin-like receptor subfamily C, member 3	-3.38899	2.1151e-05	49	73	3	9
RBM28	protein-coding	chr7:128310383-128343908	-	hsa:55131	RNA binding motif protein 28	-0.997412	0.00441927	392	616	334	194
RBM24	protein-coding	chr6:17281578-17293871	+	hsa:221662	RNA binding motif protein 24	1.79615	2.85157e-07	161	184	806	472
LOC105379082	lncRNA	chr5:92547298-92688301	-		uncharacterized LOC105379082	-2.20252	0.0405253	14	31	6	4
B3GLCT	protein-coding	chr13:31199975-31332270	+	hsa:145173	beta 1,3-galactosyltransferase-like	0.914872	0.0336079	71	82	174	132
PSD3	protein-coding	chr8:18762883-19086909	-	hsa:23362	pleckstrin and Sec7 domain containing 3	-1.92072	7.77162e-07	949	1129	426	162
LOC105370680	lncRNA	chr14:102523962-102531291	+		uncharacterized LOC105370680	1.38157	0.0359918	16	29	46	74
S100A2	protein-coding	chr1:153561108-153565830	-	hsa:6273	S100 calcium binding protein A2	1.3889	0.00166027	50	67	147	173
RHOBTB1	protein-coding	chr10:60869438-60911552	-	hsa:9886	Rho-related BTB domain containing 1	-3.71173	8.4504e-07	70	90	11	2
RHOBTB2	protein-coding	chr8:22995848-23020197	+	hsa:23221	Rho-related BTB domain containing 2	0.799523	0.00948266	350	438	646	791
S100A3	protein-coding	chr1:153547333-153549258	-	hsa:6274	S100 calcium binding protein A3	1.5595	0.00013334	69	89	203	283
S100A4	protein-coding	chr1:153543622-153545806	-	hsa:6275	S100 calcium binding protein A4	0.97042	0.000541681	1346	1638	2729	3406
LOC105369663	lncRNA	chr12:12721812-12724041	-		uncharacterized LOC105369663	2.25666	0.0134353	7	7	51	21
LOC105369664	lncRNA	chr12:12879726-12883121	-		uncharacterized LOC105369664	2.1358	0.00505973	10	11	40	57
LOC107984875	lncRNA					-1.08836	0.0399291	74	89	44	37
ZNF185	protein-coding	chrx:152898132-152973474	+	hsa:7739	zinc finger protein 185 (LIM domain)	1.4743	5.38643e-05	200	180	455	670
LGI3	protein-coding	chr8:22146830-22156831	-	hsa:203190	leucine-rich repeat LGI family, member 3	2.408	1.01364e-07	52	36	221	283
ZNF146	protein-coding	chr19:36214602-36238774	+	hsa:7705	zinc finger protein 146	-1.03306	0.0267764	176	204	143	56
OPHN1	protein-coding	chrx:68043411-68433841	-	hsa:4983	oligophrenin 1	0.994185	0.0125606	88	110	244	173
LOC101928214	ncRNA	chr2:87659751-87687161	-	hsa:101928214	uncharacterized LOC101928214	-3.41126	0.02724	16	13	3	0
TACSTD2	protein-coding	chr1:58575423-58577494	-	hsa:4070	tumor-associated calcium signal transducer 2	1.49622	5.90088e-06	151	204	478	567
TRV-CAC3-1	tRNA	chr19:4724635-4724707	-		transfer RNA-Val (CAC) 3-1	5.36132	0.0226672	0	0	8	8
RNU4-23P	ncRNA	chr11:122927034-122927173	+		RNA, U4 small nuclear 23, pseudogene	-5.12042	0.0429246	6	6	0	0
BVES-AS1	ncRNA	chr6:105137687-105169945	+	hsa:154442	BVES antisense RNA 1	4.27018	0.0385594	1	0	11	10
CABP1	protein-coding	chr12:120648867-120680858	+	hsa:9478	calcium binding protein 1	1.90828	0.039843	7	8	39	21
SLC25A15	protein-coding	chr13:40789411-40812460	+	hsa:10166	solute carrier family 25 (mitochondrial carrier; ornithine transporter) member 15	-0.686164	0.02001	582	871	472	467
SLC25A27	protein-coding	chr6:46652915-46678190	+	hsa:9481	solute carrier family 25, member 27	-1.83365	0.0127178	29	73	16	13
SLC25A37	protein-coding	chr8:23540727-23572202	+	hsa:51312	solute carrier family 25 (mitochondrial iron transporter), member 37	-0.582742	0.0343278	1571	1876	1371	1067
SLC25A41	protein-coding	chr19:6426037-6433779	-	hsa:284427	solute carrier family 25, member 41	-2.90358	0.0424147	18	9	2	2
SLC25A44	protein-coding	chr1:156193711-156212796	+	hsa:9673	solute carrier family 25, member 44	0.811107	0.00414189	910	1322	1841	2224
NR1D1	protein-coding	chr17:40092784-40100725	-	hsa:9572	nuclear receptor subfamily 1, group D, member 1	-0.979889	0.00211087	1325	1610	609	947
ZNF414	protein-coding	chr19:8511332-8514164	-	hsa:84330	zinc finger protein 414	0.932542	0.0226424	186	177	253	480
PTK6	protein-coding	chr20:63528413-63537370	-	hsa:5753	protein tyrosine kinase 6	1.18137	0.00379972	71	145	221	278
LOC105370547	lncRNA	chr14:68721670-68736994	+		uncharacterized LOC105370547	-3.75061	0.0283343	8	19	0	2
CNFN	protein-coding	chr19:42387019-42390291	-	hsa:84518	cornifelin	-0.994698	0.0232457	109	167	74	70
ZNF462	protein-coding	chr9:106864142-107012258	+	hsa:58499	zinc finger protein 462	-1.36295	0.00016229	596	678	354	176
PTMS	protein-coding	chr12:6766139-6770952	+	hsa:5763	parathymosin	0.623832	0.0392317	3951	5606	6024	9221
ZNF426	protein-coding	chr19:9523224-9538645	-	hsa:79088	zinc finger protein 426	-3.20798	0.000832608	30	41	3	5
SKIDA1	protein-coding	chr10:21513475-21525682	-	hsa:387640	SKI/DACH domain containing 1	4.19539	5.77639e-19	9	24	321	299
CNN1	protein-coding	chr19:11538717-11550323	+	hsa:1264	calponin 1, basic, smooth muscle	2.79261	0.0210063	0	8	17	36
PTRF	protein-coding	chr17:42411367-42423320	-	hsa:284119	polymerase I and transcript release factor	1.2077	7.89261e-06	3945	4700	9509	11484
CNN3	protein-coding	chr1:94896949-94927223	-	hsa:1266	calponin 3, acidic	0.76461	0.00274232	3200	4023	6828	6097
MYO5B	protein-coding	chr18:49822786-50195081	-	hsa:4645	myosin VB	0.605514	0.0262267	1053	1276	2078	1670
DEGS2	protein-coding	chr14:100146416-100159675	-	hsa:123099	delta(4)-desaturase, sphingolipid 2	-6.58974	0.000676009	21	11	0	0
MUC13	protein-coding	chr3:124905442-124934751	-	hsa:56667	mucin 13, cell surface associated	3.27977	3.13088e-09	11	18	181	114
UBR5	protein-coding	chr8:102253338-102412719	-	hsa:51366	ubiquitin protein ligase E3 component n-recognin 5	-0.587984	0.050117	4011	5024	4040	2340
RBMS2	protein-coding	chr12:56542317-56595600	+	hsa:5939	RNA binding motif, single stranded interacting protein 2	1.53329	6.93615e-08	437	486	1406	1423
UBR4	protein-coding	chr1:19074508-19210334	-	hsa:23352	ubiquitin protein ligase E3 component n-recognin 4	-0.630859	0.0145608	6599	7505	4969	4679
DNAH1	protein-coding	chr3:52316319-52400497	+	hsa:25981	dynein, axonemal, heavy chain 1	-1.12808	0.0342987	75	89	37	42
DNAH3	protein-coding	chr16:20933111-21151075	-	hsa:55567	dynein, axonemal, heavy chain 3	2.8717	1.60805e-06	13	14	90	118
LOC105370439	lncRNA	chr14:31940718-31960678	+		uncharacterized LOC105370439	-4.30873	0.0439359	11	7	1	0
DNAJB13	protein-coding	chr11:73957259-73970287	+	hsa:374407	DnaJ (Hsp40) homolog, subfamily B, member 13	3.45161	0.0485181	2	0	17	8
LOC105370463	lncRNA	chr14:40267384-40318425	-		uncharacterized LOC105370463	-5.59349	0.00166614	23	22	1	0
ASAP2	protein-coding	chr2:9207024-9405678	+	hsa:8853	ArfGAP with SH3 domain, ankyrin repeat and PH domain 2	1.42109	0.0100854	32	34	119	70
COCH	protein-coding	chr14:30874496-30890618	+	hsa:1690	cochlin	1.68313	9.19355e-07	136	139	526	417
PUM1	protein-coding	chr1:30931506-31065717	-	hsa:9698	pumilio RNA-binding family member 1	-2.05397	1.46391e-07	564	935	267	111
WNT9A	protein-coding	chr1:227921464-227947975	-	hsa:7483	wingless-type MMTV integration site family, member 9A	1.22845	0.0032149	77	74	197	181
LIAS	protein-coding	chr4:39459031-39468886	+	hsa:11019	lipoic acid synthetase	-1.16947	0.00855582	148	187	103	55
WNT7A	protein-coding	chr3:13818585-13880121	-	hsa:7476	wingless-type MMTV integration site family, member 7A	1.62538	0.00542203	27	26	68	105
WNT7B	protein-coding	chr22:45920362-45972364	-	hsa:7477	wingless-type MMTV integration site family, member 7B	1.37816	4.06093e-05	360	494	873	1428
ZNF333	protein-coding	chr19:14712051-14723349	+	hsa:84449	zinc finger protein 333	-1.28908	0.00145049	161	209	82	77
WNT5B	protein-coding	chr12:1629246-1647212	+	hsa:81029	wingless-type MMTV integration site family, member 5B	2.47742	0.000216063	8	17	71	72
PUS3	protein-coding	chr11:125893655-125903219	-	hsa:83480	pseudouridylate synthase 3	-0.971585	0.0398679	88	144	71	52
LIG1	protein-coding	chr19:48115445-48170603	-	hsa:3978	ligase I, DNA, ATP-dependent	-0.666835	0.0145439	1430	1693	1025	1050
HMHA1	protein-coding	chr19:1076634-1087831	+	hsa:23526	histocompatibility (minor) HA-1	0.89608	0.0059575	365	390	627	857
CENPN	protein-coding	chr16:81006498-81031485	+	hsa:55839	centromere protein N	0.662214	0.0146636	1399	2079	3222	2526
CENPO	protein-coding	chr2:24793115-24822376	+	hsa:79172	centromere protein O	0.792271	0.00344855	1176	1518	2305	2581
CENPM	protein-coding	chr22:41938721-41940219	-	hsa:79019	centromere protein M	0.919569	0.00395755	708	909	1242	1944
ZNF383	protein-coding	chr19:37217243-37244937	+	hsa:163087	zinc finger protein 383	-1.11047	0.0136929	127	183	97	54
ZNF365	protein-coding	chr10:62374157-62402458	+	hsa:22891	zinc finger protein 365	1.65936	5.26822e-05	65	75	281	189
ZNF358	protein-coding	chr19:7513880-7521025	+	hsa:140467	zinc finger protein 358	1.2737	0.000155523	253	380	631	949
VASH1	protein-coding	chr14:76761892-76783020	+	hsa:22846	vasohibin 1	0.665157	0.0254507	354	424	671	631
ZNF350	protein-coding	chr19:51964340-51986876	-	hsa:59348	zinc finger protein 350	1.51954	0.0240244	17	26	92	38
TSSC4	protein-coding	chr11:2400409-2403878	+	hsa:10078	tumor suppressing subtransferable candidate 4	0.632079	0.0409437	545	626	817	1092
FRAT2	protein-coding	chr10:97332497-97334701	-	hsa:23401	frequently rearranged in advanced T-cell lymphomas 2	-0.990708	0.0171215	155	344	110	144
ZNF397	protein-coding	chr18:35241030-35247189	+	hsa:84307	zinc finger protein 397	-1.51539	0.000179104	256	281	130	71
LIPE	protein-coding	chr19:42401512-42412293	-	hsa:3991	lipase, hormone-sensitive	0.743355	0.0276473	216	360	434	558
LIPG	protein-coding	chr18:49560699-49592908	+	hsa:9388	lipase, endothelial	1.08485	0.00135533	146	245	414	442
LIPH	protein-coding	chr3:185506262-185552588	-	hsa:200879	lipase, member H	-0.789409	0.00958948	461	663	357	322
TRI-AAT2-1	tRNA	chr6:27688188-27688261	+		transfer RNA-Ile (AAT) 2-1	-0.929321	0.00584211	371	587	226	293
PTPRJ	protein-coding	chr11:47980558-48170842	+	hsa:5795	protein tyrosine phosphatase, receptor type, J	1.04332	0.0231499	60	72	180	109
PTPRM	protein-coding	chr18:7748381-8314797	+	hsa:5797	protein tyrosine phosphatase, receptor type, M	-1.5682	0.00382726	72	108	29	34
ISY1-RAB43	protein-coding	chr3:129087569-129161230	-	hsa:100534599	ISY1-RAB43 readthrough	0.792242	0.0193387	154	235	351	349
UCN2	protein-coding	chr3:48561718-48563768	-	hsa:90226	urocortin 2	5.35186	0.00310853	0	1	13	29
LOC101928489	ncRNA	chr6:73693903-73696131	-	hsa:101928489	uncharacterized LOC101928489	2.01224	0.0348075	7	6	27	29
UCP2	protein-coding	chr11:73974671-73982844	-	hsa:7351	uncoupling protein 2 (mitochondrial, proton carrier)	1.94012	9.06324e-10	365	469	1338	1998
PPDPF	protein-coding	chr20:63520780-63522171	+	hsa:79144	pancreatic progenitor cell differentiation and proliferation factor	0.802864	0.0162979	1767	2056	2482	4493
CPA4	protein-coding	chr7:130293134-130324180	+	hsa:51200	carboxypeptidase A4	1.03126	0.000624131	629	620	1243	1474
NR3C2	protein-coding	chr4:148078764-148445183	-	hsa:4306	nuclear receptor subfamily 3, group C, member 2	-2.10811	0.0260335	16	48	10	5
NR3C1	protein-coding	chr5:143277933-143391988	-	hsa:2908	nuclear receptor subfamily 3, group C, member 1 (glucocorticoid receptor)	0.834037	0.0495479	168	208	515	201
LOC102723786	ncRNA	chr16:71288866-71302869	+	hsa:102723786	uncharacterized LOC102723786	-1.88806	1.83652e-10	1029	1620	424	321
E2F5	protein-coding	chr8:85177384-85214518	+	hsa:1875	E2F transcription factor 5, p130-binding	-1.1791	0.00250975	184	287	128	89
TIMM17B	protein-coding	chrx:48893447-48898143	-	hsa:10245	translocase of inner mitochondrial membrane 17 homolog B (yeast)	0.729131	0.0216189	1342	1610	1959	3158
ANXA5	protein-coding	chr4:121679848-121696992	-	hsa:308	annexin A5	0.771355	0.00236535	8186	10194	16363	16626
ANXA3	protein-coding	chr4:78551588-78610451	+	hsa:306	annexin A3	0.626223	0.0244651	2931	3879	6628	4461
ANXA6	protein-coding	chr5:151100710-151157882	-	hsa:309	annexin A6	1.08347	3.87187e-05	2656	3043	6180	6578
B3GNT5	protein-coding	chr3:183265311-183273391	+	hsa:84002	UDP-GlcNAc:betaGal beta-1,3-N-acetylglucosaminyltransferase 5	-1.43339	0.0283131	38	78	24	20
PTPN1	protein-coding	chr20:50510321-50584762	+	hsa:5770	protein tyrosine phosphatase, non-receptor type 1	0.845075	0.0176426	161	167	353	276
TCF7L1	protein-coding	chr2:85133460-85310388	+	hsa:83439	transcription factor 7-like 1 (T-cell specific, HMG-box)	1.0097	0.0378527	47	56	100	118
TCF7L2	protein-coding	chr10:112950219-113167678	+	hsa:6934	transcription factor 7-like 2 (T-cell specific, HMG-box)	-1.29469	9.46985e-05	642	832	402	234
CPOX	protein-coding	chr3:98576092-98593675	-	hsa:1371	coproporphyrinogen oxidase	-1.34185	7.85258e-07	3834	6141	2269	1819
CPTP	protein-coding	chr1:1324763-1328896	+	hsa:80772	ceramide-1-phosphate transfer protein	1.11879	0.00108904	305	422	624	1012
RBPMS	protein-coding	chr8:30384506-30545157	+	hsa:11030	RNA binding protein with multiple splicing	1.62562	3.34365e-07	242	274	735	942
CPVL	protein-coding	chr7:28995630-29146537	-	hsa:54504	carboxypeptidase, vitellogenic-like	-1.3678	0.00859327	108	95	51	34
LOC101928402	ncRNA	chrx:123959233-123961341	-	hsa:101928402	uncharacterized LOC101928402	-5.62505	0.0137255	5	13	0	0
SLC16A4	protein-coding	chr1:110362856-110391968	-	hsa:9122	solute carrier family 16, member 4	4.35588	0.0202172	6	0	70	75
SLC16A3	protein-coding	chr17:82228406-82239499	+	hsa:9123	solute carrier family 16 (monocarboxylate transporter), member 3	0.809171	0.00676666	988	1154	1659	2283
SLC16A9	protein-coding	chr10:59650764-59709891	-	hsa:220963	solute carrier family 16, member 9	-1.42924	0.0056003	90	181	71	33
SLC16A6	protein-coding	chr17:68267026-68285560	-	hsa:9120	solute carrier family 16, member 6	1.36677	0.0442143	19	24	82	36
ALKBH6	protein-coding	chr19:36009120-36013625	-	hsa:84964	alkB, alkylation repair homolog 6 (E. coli)	0.872322	0.0120712	170	236	335	438
NR2F2	protein-coding	chr15:96325928-96340263	+	hsa:7026	nuclear receptor subfamily 2, group F, member 2	0.72864	0.0303914	199	251	459	329
NR2F1	protein-coding	chr5:93587101-93594613	+	hsa:7025	nuclear receptor subfamily 2, group F, member 1	-0.667331	0.0353731	464	563	398	287
RNU1-2	snRNA	chr1:16895980-16896143	+	hsa:26870	RNA, U1 small nuclear 2	2.05111	0.0167323	4	17	30	56
NR1H2	protein-coding	chr19:50376423-50383028	+	hsa:7376	nuclear receptor subfamily 1, group H, member 2	0.713597	0.0271887	639	784	952	1486
GMPPB	protein-coding	chr3:49721476-49723974	-	hsa:29925	GDP-mannose pyrophosphorylase B	0.700131	0.0257359	413	439	655	810
PDCD11	protein-coding	chr10:103399788-103446295	+	hsa:22984	programmed cell death 11	-1.33708	2.77502e-07	3994	4756	1935	1726
GPR161	protein-coding	chr1:168079542-168137667	-	hsa:23432	G protein-coupled receptor 161	0.715592	0.0100848	587	770	1257	1085
GPR162	protein-coding	chr12:6821797-6827418	+	hsa:27239	G protein-coupled receptor 162	1.92419	1.33829e-05	53	47	184	221
PTMAP5	pseudo	chr13:81689896-81691080	+		prothymosin, alpha pseudogene 5	-0.89957	0.00691622	457	799	420	278
PTMAP7	pseudo	chr14:92026422-92027567	+		prothymosin, alpha pseudogene 7	2.84985	0.00498828	3	5	31	29
PTMAP2	pseudo	chr5:118973562-118974820	+		prothymosin, alpha pseudogene 2	-1.12212	8.00578e-05	1126	1609	746	570
HOXA-AS2	ncRNA	chr7:27121919-27128760	+	hsa:285943	HOXA cluster antisense RNA 2	2.36996	0.0194704	7	3	32	25
PXDN	protein-coding	chr2:1631887-1744547	-	hsa:7837	peroxidasin homolog (Drosophila)	0.968668	0.00153684	279	325	621	627
CRAT	protein-coding	chr9:129094794-129110783	-	hsa:1384	carnitine O-acetyltransferase	0.952437	0.00106157	850	1266	1854	2385
GRB14	protein-coding	chr2:164497374-164621482	-	hsa:2888	growth factor receptor-bound protein 14	-2.10274	0.0032726	41	88	23	8
SORT1	protein-coding	chr1:109309575-109397940	-	hsa:6272	sortilin 1	1.38269	1.5007e-07	1478	1997	5276	4241
BAMBI	protein-coding	chr10:28677495-28682939	+	hsa:25805	BMP and activin membrane-bound inhibitor	1.24256	0.00048106	120	135	316	322
KRTCAP3	protein-coding	chr2:27442366-27446481	+	hsa:200634	keratinocyte associated protein 3	-0.797542	0.0187146	556	877	333	515
YRDC	protein-coding	chr1:37802942-37808193	-	hsa:79693	yrdC N(6)-threonylcarbamoyltransferase domain containing	-0.60831	0.0427895	846	1128	588	762
ZBTB20	protein-coding	chr3:114314500-115071414	-	hsa:26137	zinc finger and BTB domain containing 20	-1.14089	0.0486271	76	137	77	24
ZBTB39	protein-coding	chr12:56998833-57006513	-	hsa:9880	zinc finger and BTB domain containing 39	-0.620856	0.02746	901	1122	757	631
ZBTB18	protein-coding	chr1:244051259-244057476	+	hsa:10472	zinc finger and BTB domain containing 18	1.42001	0.00481908	38	53	167	90
CRYGS	protein-coding	chr3:186538443-186544378	-	hsa:1427	crystallin, gamma S	-2.27232	0.0459789	21	19	7	2
PPP4R1L	pseudo	chr20:58232777-58309439	-	hsa:55370	protein phosphatase 4, regulatory subunit 1-like (pseudogene)	-0.95891	0.0499331	92	105	51	56
CTNNB1	protein-coding	chr3:41199451-41240448	+	hsa:1499	catenin (cadherin-associated protein), beta 1, 88kDa	-0.762935	0.00417697	5624	7178	4570	3394
SFXN5	protein-coding	chr2:72942036-73060726	-	hsa:94097	sideroflexin 5	0.87008	0.0246965	101	115	204	213
SFXN3	protein-coding	chr10:101031239-101041241	+	hsa:81855	sideroflexin 3	0.685441	0.0132157	1310	1622	2256	2690
SFXN4	protein-coding	chr10:119140913-119165593	-	hsa:119559	sideroflexin 4	-0.693284	0.0193696	1147	1417	719	942
LOC105379356	protein-coding	chr8:30732477-30734324	+		uncharacterized LOC105379356	-3.1045	0.0137813	23	16	4	1
P2RY2	protein-coding	chr11:73216442-73236347	+	hsa:5029	purinergic receptor P2Y, G-protein coupled, 2	0.874405	0.0113714	182	298	391	515
P2RY6	protein-coding	chr11:73290422-73297805	+	hsa:5031	pyrimidinergic receptor P2Y, G-protein coupled, 6	7.7713	3.09889e-06	0	0	42	43
MLLT3	protein-coding	chr9:20342383-20622458	-	hsa:4300	myeloid/lymphoid or mixed-lineage leukemia (trithorax homolog, Drosophila); translocated to, 3	-1.66898	0.0189406	51	62	29	9
CRY1	protein-coding	chr12:106991378-107093872	-	hsa:1407	cryptochrome circadian clock 1	0.65683	0.0323627	299	405	652	514
P2RX5	protein-coding	chr17:3673227-3696404	-	hsa:5026	purinergic receptor P2X, ligand-gated ion channel, 5	-0.927477	0.00357382	452	584	261	309
CDK5RAP3	protein-coding	chr17:47970528-47981786	+	hsa:80279	CDK5 regulatory subunit associated protein 3	-1.14626	0.000132872	763	924	369	432
PYGB	protein-coding	chr20:25248070-25298012	+	hsa:5834	phosphorylase, glycogen; brain	0.82234	0.00359802	3167	3321	5433	6725
PYGL	protein-coding	chr14:50905217-50944530	-	hsa:5836	phosphorylase, glycogen, liver	-0.928762	0.00164576	1990	2829	1633	1028
NR4A2	protein-coding	chr2:156324778-156334683	-	hsa:4929	nuclear receptor subfamily 4, group A, member 2	-0.972271	0.000491719	961	1330	626	595
CSF1	protein-coding	chr1:109910611-109926743	+	hsa:1435	colony stimulating factor 1 (macrophage)	1.08618	0.00386192	88	138	265	234
LOC105379282	protein-coding	chr1:226971536-226977439	+		glucose-dependent insulinotropic receptor-like	-3.32613	0.0350198	9	20	3	0
SLC18B1	protein-coding	chr6:132769585-132798627	-	hsa:116843	solute carrier family 18, subfamily B, member 1	-0.966457	0.00402492	306	441	224	176
LMF2	protein-coding	chr22:50502949-50507691	-	hsa:91289	lipase maturation factor 2	1.01334	0.00239964	576	632	975	1589
LOC102723834	ncRNA	chr1:225701114-225716947	+	hsa:102723834	uncharacterized LOC102723834	3.59968	0.0346971	2	0	9	18
LOC102723825	ncRNA	chr2:240386101-240387740	-	hsa:102723825	uncharacterized LOC102723825	6.7798	0.000241972	0	0	25	18
LOC105379235	lncRNA	chr8:10049130-10053062	-		uncharacterized LOC105379235	-4.3463	0.0429117	13	5	1	0
CST6	protein-coding	chr11:66011991-66013505	+	hsa:1474	cystatin E/M	1.30904	2.99693e-05	571	641	1289	1870
LMNA	protein-coding	chr1:156114670-156140081	+	hsa:4000	lamin A/C	0.606594	0.0225702	9198	9558	14943	15439
LMO4	protein-coding	chr1:87328868-87347459	+	hsa:8543	LIM domain only 4	-2.14642	8.92689e-07	217	373	96	43
CSTB	protein-coding	chr21:43773665-43776375	-	hsa:1476	cystatin B (stefin B)	0.786742	0.0113582	576	589	929	1202
HADH	protein-coding	chr4:108004635-108035171	+	hsa:3033	hydroxyacyl-CoA dehydrogenase	-0.591005	0.0366924	786	982	628	607
LOC105369822	lncRNA	chr12:69446776-69462758	+		uncharacterized LOC105369822	5.43468	0.0193841	0	0	11	6
CABLES2	protein-coding	chr20:62388630-62407283	-	hsa:81928	Cdk5 and Abl enzyme substrate 2	0.663595	0.0352172	305	390	519	633
LOC105369845	lncRNA	chr12:75523950-75566781	-		uncharacterized LOC105369845	-3.3697	0.0144861	11	31	0	4
LOC105369846	lncRNA	chr12:75772692-75782197	-		uncharacterized LOC105369846	-4.19356	0.00906971	9	27	2	0
C15orf59	protein-coding	chr15:73735431-73752370	-	hsa:388135	chromosome 15 open reading frame 59	1.92986	0.000185293	27	36	103	147
C15orf61	protein-coding	chr15:67521184-67527303	+	hsa:145853	chromosome 15 open reading frame 61	-1.11659	0.0195809	108	149	47	76
LOC105369807	lncRNA	chr12:65602869-65607350	+		uncharacterized LOC105369807	-2.49794	0.000112547	66	89	20	9
MIR584	ncRNA	chr5:149062334-149062355	-	hsa:693169	microRNA 584	5.15498	0.0367188	0	0	9	5
NUBP1	protein-coding	chr16:10743786-10769351	+	hsa:4682	nucleotide binding protein 1	0.598946	0.0382485	457	601	816	862
WWTR1	protein-coding	chr3:149517235-149724783	-	hsa:25937	WW domain containing transcription regulator 1	1.30258	0.00016469	727	804	2754	1300
PCBP4	protein-coding	chr3:51957454-51964565	-	hsa:57060	poly(rC) binding protein 4	1.32982	9.57198e-06	1489	1881	3564	5277
CTBS	protein-coding	chr1:84553121-84574480	-	hsa:1486	chitobiase, di-N-acetyl-	-0.878733	0.0153727	239	388	211	144
VSNL1	protein-coding	chr2:17540540-17656439	+	hsa:7447	visinin-like 1	-1.67077	8.60536e-07	345	536	159	129
HAS2	protein-coding	chr8:121613031-121641390	-	hsa:3037	hyaluronan synthase 2	5.29579	3.44157e-06	3	0	103	29
HAS3	protein-coding	chr16:69106226-69118719	+	hsa:3038	hyaluronan synthase 3	-2.6968	4.94826e-22	2049	2329	349	365
NCOA5	protein-coding	chr20:46060985-46089962	-	hsa:57727	nuclear receptor coactivator 5	0.723579	0.00844734	1152	1451	2089	2417
NCOA1	protein-coding	chr2:24584477-24770702	+	hsa:8648	nuclear receptor coactivator 1	1.80505	0.0343124	15	7	62	24
SLC19A2	protein-coding	chr1:169463909-169485970	-	hsa:10560	solute carrier family 19 (thiamine transporter), member 2	-0.970538	0.00526011	269	325	169	151
CTGF	protein-coding	chr6:131948176-131951378	-	hsa:1490	connective tissue growth factor	2.63874	1.77351e-20	218	297	1637	1715
CDC42BPA	protein-coding	chr1:227012725-227318237	-	hsa:8476	CDC42 binding protein kinase alpha (DMPK-like)	1.47783	0.000395862	1031	1338	5465	1594
CTSD	protein-coding	chr11:1752752-1763992	-	hsa:1509	cathepsin D	0.941221	0.00104759	2871	3746	5563	7685
CTSZ	protein-coding	chr20:58995187-59007254	-	hsa:1522	cathepsin Z	0.865037	0.0017423	1519	1608	2880	3164
CNOT1	protein-coding	chr16:58519946-58629886	-	hsa:23019	CCR4-NOT transcription complex, subunit 1	-0.677615	0.0133496	5307	7748	5005	3543
KIAA1024	protein-coding	chr15:79432323-79472304	+	hsa:23251	KIAA1024	-0.867305	0.0310303	173	183	115	93
NPTXR	protein-coding	chr22:38818451-38844012	-	hsa:23467	neuronal pentraxin receptor	1.67483	1.67324e-07	378	526	1191	1802
SCNN1A	protein-coding	chr12:6346843-6377357	-	hsa:6337	sodium channel, non-voltage-gated 1 alpha subunit	-0.91641	0.00152937	1313	1728	745	937
CASC21	lncRNA	chr8:127244637-127392631	+		cancer susceptibility candidate 21 (non-protein coding)	-5.21103	0.0398442	2	12	0	0
CASC19	lncRNA	chr8:127187785-127197627	-		cancer susceptibility candidate 19 (non-protein coding)	-5.83249	0.00805381	5	16	0	0
CASC10	protein-coding	chr10:21494492-21497284	-	hsa:399726	cancer susceptibility candidate 10	3.54285	2.41137e-14	13	35	269	300
HBP1	protein-coding	chr7:107169773-107202517	+	hsa:26959	HMG-box transcription factor 1	-0.834825	0.00674086	674	951	572	385
RGAG4	protein-coding	chrx:72127110-72131901	-	hsa:340526	retrotransposon gag domain containing 4	0.729136	0.0329158	160	198	323	302
ATP1B1	protein-coding	chr1:169106709-169132722	+	hsa:481	ATPase, Na+/K+ transporting, beta 1 polypeptide	0.624128	0.0397783	801	1233	2011	1268
MIR423	ncRNA	chr17:30117095-30117117	+	hsa:494335	microRNA 423	-5.23379	0.0388338	10	2	0	0
NDUFAF4	protein-coding	chr6:96889311-96897891	-	hsa:29078	NADH dehydrogenase (ubiquinone) complex I, assembly factor 4	-0.824293	0.0103583	347	532	267	249
CRISPLD2	protein-coding	chr16:84819981-84909510	+	hsa:83716	cysteine-rich secretory protein LCCL domain containing 2	0.812944	0.0130007	184	256	396	411
LOC107984035	lncRNA					-1.93607	0.0217448	25	46	8	11
CUTC	protein-coding	chr10:99732201-99756137	+	hsa:51076	cutC copper transporter	-0.717049	0.0131069	667	908	500	502
LOC107984000	lncRNA					-6.00454	0.00449255	8	15	0	0
SUPV3L1	protein-coding	chr10:69180204-69209098	+	hsa:6832	suppressor of var1, 3-like 1 (S. cerevisiae)	-0.726189	0.00990967	859	1067	646	581
LLPH-AS1	lncRNA	chr12:66130751-66134449	+		LLPH antisense RNA 1 (head to head)	-4.32023	0.0409524	9	10	0	1
HCN2	protein-coding	chr19:589893-617159	+	hsa:610	hyperpolarization activated cyclic nucleotide-gated potassium channel 2	5.48513	0.0213784	0	0	2	15
NLGN2	protein-coding	chr17:7405492-7419860	+	hsa:57555	neuroligin 2	0.600188	0.0472888	766	941	1140	1569
ATP2A3	protein-coding	chr17:3923869-3964464	-	hsa:489	ATPase, Ca++ transporting, ubiquitous	0.627383	0.0432526	500	696	809	1110
POC1B-GALNT4	protein-coding	chr12:89519412-89526262	-	hsa:100528030	POC1B-GALNT4 readthrough	1.10899	0.00937124	99	113	328	161
LRPPRC	protein-coding	chr2:43912445-43995989	-	hsa:10128	leucine-rich pentatricopeptide repeat containing	-1.06519	0.00336349	711	941	577	261
TOR4A	protein-coding	chr9:137277828-137282641	+	hsa:54863	torsin family 4, member A	1.0356	0.00082414	805	1022	1566	2341
WFDC1	protein-coding	chr16:84294706-84329851	+	hsa:58189	WAP four-disulfide core domain 1	2.2107	0.0466389	2	8	16	30
RPL23P4	pseudo	chr2:219697813-219698214	+		ribosomal protein L23 pseudogene 4	-2.98794	0.0453808	15	14	4	0
LOC105374988	lncRNA	chr6:26569324-26574698	+		uncharacterized LOC105374988	-2.41089	0.034422	22	24	1	8
HIF1A	protein-coding	chr14:61695401-61748259	+	hsa:3091	hypoxia inducible factor 1, alpha subunit (basic helix-loop-helix transcription factor)	0.784158	0.0181871	1924	2281	5220	2517
LOC107984158	lncRNA					-3.49769	8.45877e-08	82	101	7	10
SERTAD2	protein-coding	chr2:64631621-64653912	-	hsa:9792	SERTA domain containing 2	-0.664937	0.0404216	1389	1889	1433	753
SOX12	protein-coding	chr20:325571-330228	+	hsa:6666	SRY (sex determining region Y)-box 12	-0.844139	0.0030341	1053	1447	675	777
SOX13	protein-coding	chr1:204073118-204127743	+	hsa:9580	SRY (sex determining region Y)-box 13	0.95629	0.00109638	712	899	1425	1845
SOX18	protein-coding	chr20:64047726-64049626	-	hsa:54345	SRY (sex determining region Y)-box 18	1.28775	0.0160422	27	46	87	97
C20orf24	protein-coding	chr20:36605734-36612557	+	hsa:55969	chromosome 20 open reading frame 24	0.622205	0.0285372	1159	1328	1817	2217
STXBP6	protein-coding	chr14:24809654-25032569	-	hsa:29091	syntaxin binding protein 6 (amisyn)	-5.03692	0.000275261	23	40	2	0
PCDH1	protein-coding	chr5:141862652-141878410	-	hsa:5097	protocadherin 1	0.794871	0.00610327	1386	1930	2544	3432
TRIOBP	protein-coding	chr22:37746234-37759954	+	hsa:11078	TRIO and F-actin binding protein	-1.14974	0.00972079	145	145	81	59
PCDH7	protein-coding	chr4:30720381-31146800	+	hsa:5099	protocadherin 7	-7.87045	1.57919e-45	1045	1151	8	2
TRIML2	protein-coding	chr4:188091255-188104920	-	hsa:205860	tripartite motif family-like 2	1.36723	0.0011225	94	80	296	190
UBE2O	protein-coding	chr17:76389532-76453190	-	hsa:63893	ubiquitin-conjugating enzyme E2O	-0.613533	0.0238591	2079	2240	1538	1462
UBE2B	protein-coding	chr5:134371176-134392108	+	hsa:7320	ubiquitin-conjugating enzyme E2B	0.718935	0.0171587	451	549	1022	722
UBE2C	protein-coding	chr20:45812576-45816957	+	hsa:11065	ubiquitin-conjugating enzyme E2C	1.02077	0.000430947	2289	2776	4507	6259
UBE2A	protein-coding	chrx:119574467-119584429	+	hsa:7319	ubiquitin-conjugating enzyme E2A	0.769117	0.00405582	1132	1676	2670	2320
HMOX2	protein-coding	chr16:4474697-4510345	+	hsa:3163	heme oxygenase (decycling) 2	1.33677	0.0137742	153	43	264	299
HMOX1	protein-coding	chr22:35381067-35394214	+	hsa:3162	heme oxygenase (decycling) 1	0.630784	0.0441134	407	532	650	867
LOC107984292	lncRNA					-5.9045	0.00856477	2	21	0	0
DACT3	protein-coding	chr19:46647564-46654657	-	hsa:147906	dishevelled-binding antagonist of beta-catenin 3	1.09879	0.00768043	100	110	186	287
DACT1	protein-coding	chr14:58638039-58648321	+	hsa:51339	dishevelled-binding antagonist of beta-catenin 1	-1.33843	0.00154934	164	178	81	63
NDUFA11	protein-coding	chr19:5894670-5904013	-	hsa:126328	NADH dehydrogenase (ubiquinone) 1 alpha subcomplex, 11, 14.7kDa	0.663283	0.0284272	2771	3795	4274	6516
HEG1	protein-coding	chr3:124965710-125055958	-	hsa:57493	heart development protein with EGF-like domains 1	2.65186	2.51217e-20	189	252	1559	1351
ATP11C	protein-coding	chrx:139726346-139932985	-	hsa:286410	ATPase, class VI, type 11C	-0.933589	0.0250664	318	386	282	112
NUCB2	protein-coding	chr11:17276723-17331863	+	hsa:4925	nucleobindin 2	0.819107	0.039004	168	184	446	220
HELB	protein-coding	chr12:66302545-66343643	+	hsa:92797	helicase (DNA) B	-1.00995	0.0312795	178	180	136	56
MIR198	ncRNA	chr3:120395668-120395729	-	hsa:406975	microRNA 198	1.10389	0.0315852	34	61	129	83
CDC42EP3	protein-coding	chr2:37641882-37672199	-	hsa:10602	CDC42 effector protein (Rho GTPase binding) 3	0.700729	0.0414339	673	909	1841	883
CDC42EP1	protein-coding	chr22:37565600-37569405	+	hsa:11135	CDC42 effector protein (Rho GTPase binding) 1	0.60307	0.0471551	3288	4676	4938	7582
RBPMS2	protein-coding	chr15:64739894-64775571	-	hsa:348093	RNA binding protein with multiple splicing 2	0.878389	0.00914255	183	330	455	513
CDC42EP2	protein-coding	chr11:65314729-65322418	+	hsa:10435	CDC42 effector protein (Rho GTPase binding) 2	0.875202	0.0058522	619	615	1012	1390
PPIL2	protein-coding	chr22:21665984-21697913	+	hsa:23759	peptidylprolyl isomerase (cyclophilin)-like 2	0.616053	0.0379639	867	938	1288	1636
CNPY3	protein-coding	chr6:42928002-42939287	+	hsa:10695	canopy FGF signaling regulator 3	0.604192	0.039514	1201	1315	1757	2281
HEPH	protein-coding	chrx:66164230-66267389	+	hsa:9843	hephaestin	-4.85607	0.000483846	21	35	1	1
HES2	protein-coding	chr1:6415232-6419919	-	hsa:54626	hes family bHLH transcription factor 2	1.65571	3.74906e-08	220	261	824	776
SLCO1B3	protein-coding	chr12:20810704-20916911	+	hsa:28234	solute carrier organic anion transporter family, member 1B3	1.89476	4.04212e-06	95	93	502	252
SLCO1B1	protein-coding	chr12:21131194-21239796	+	hsa:10599	solute carrier organic anion transporter family, member 1B1	4.21022	0.0054828	2	0	19	22
RTN4R	protein-coding	chr22:20241415-20268293	-	hsa:65078	reticulon 4 receptor	0.95623	0.00425373	230	376	516	694
LRBA	protein-coding	chr4:150264659-151015497	-	hsa:987	LPS-responsive vesicle trafficking, beach and anchor containing	-0.805409	0.0158511	669	835	588	326
LRG1	protein-coding	chr19:4537215-4540024	-	hsa:116844	leucine-rich alpha-2-glycoprotein 1	-4.26343	0.0465531	6	13	0	1
FRMD3	protein-coding	chr9:83244621-83560208	-	hsa:257019	FERM domain containing 3	5.3255	0.000112777	0	2	64	19
FRMD8	protein-coding	chr11:65386570-65413525	+	hsa:83786	FERM domain containing 8	0.684156	0.0191139	841	978	1358	1717
LOC105369371	lncRNA	chr11:70063152-70071175	+		uncharacterized LOC105369371	3.44528	0.000823266	6	1	25	59
CPPED1	protein-coding	chr16:12659799-12803887	-	hsa:55313	calcineurin-like phosphoesterase domain containing 1	0.713896	0.0370255	173	312	390	427
PPME1	protein-coding	chr11:74170891-74243047	+	hsa:51400	protein phosphatase methylesterase 1	1.10773	0.00142943	235	201	476	533
LOC105369362	lncRNA	chr11:68121649-68130507	+		uncharacterized LOC105369362	1.69912	0.0495778	13	12	17	68
LRP5	protein-coding	chr11:68298866-68449275	+	hsa:4041	low density lipoprotein receptor-related protein 5	0.643544	0.0286778	1533	2216	2542	3524
LOC105369308	lncRNA	chr21:36632681-36699004	-		uncharacterized LOC105369308	-4.68845	0.0214544	5	21	1	0
LOC107984368	lncRNA					5.46276	0.0182506	0	0	6	11
DAGLB	protein-coding	chr7:6409116-6448012	-	hsa:221955	diacylglycerol lipase, beta	-0.590067	0.0446323	821	899	579	631
KIAA1462	protein-coding	chr10:30012800-30059586	-	hsa:57608	KIAA1462	0.788728	0.015621	633	731	1623	893
TMEM147-AS1	lncRNA	chr19:35540738-35546029	-	hsa:100506469	TMEM147 antisense RNA 1	-1.48955	0.00294161	94	192	69	36
CALM1	protein-coding	chr14:90398208-90408268	+	hsa:801	calmodulin 1 (phosphorylase kinase, delta)	0.664072	0.0321436	1765	2579	4648	2590
CALM2	protein-coding	chr2:47160082-47176623	-	hsa:805	calmodulin 2 (phosphorylase kinase, delta)	1.05847	3.6702e-05	4910	6811	13984	11597
CALM3	protein-coding	chr19:46601255-46610782	+	hsa:808	calmodulin 3 (phosphorylase kinase, delta)	0.746579	0.00601984	6028	7467	10574	13158
LOC653513	protein-coding	chr1:149191121-149322070	-	hsa:653513	phosphodiesterase 4D interacting protein pseudogene	5.41744	0.0226464	0	0	14	3
CYS1	protein-coding	chr2:10056799-10080411	-	hsa:192668	cystin 1	1.08764	0.0123374	54	97	155	175
LOC105370205	lncRNA	chr13:49635465-49640334	-		uncharacterized LOC105370205	-5.47712	0.0196057	9	6	0	0
BLOC1S1-RDH5	ncRNA	chr12:55716034-55724742	+	hsa:100528022	BLOC1S1-RDH5 readthrough	0.777863	0.0301769	161	186	276	350
SLCO2A1	protein-coding	chr3:133932701-134029989	-	hsa:6578	solute carrier organic anion transporter family, member 2A1	3.07794	0.0108044	3	2	17	28
LOC107984466	lncRNA					-5.26547	0.0323874	4	10	0	0
AKR1E2	protein-coding	chr10:4824556-4848062	+	hsa:83592	aldo-keto reductase family 1, member E2	0.884173	0.0196998	142	134	248	295
LOC107984489	lncRNA					-2.16644	0.0264145	15	43	7	6
AKR1A1	protein-coding	chr1:45550783-45570051	+	hsa:10327	aldo-keto reductase family 1, member A1 (aldehyde reductase)	-0.700742	0.0163663	2206	3129	1441	1964
KIAA1522	protein-coding	chr1:32741839-32770860	+	hsa:57648	KIAA1522	0.591533	0.0361545	1554	1871	2394	3024
FIRRE	ncRNA	chrx:131702650-131830643	-	hsa:286467	firre intergenic repeating RNA element	-0.922613	0.00455636	351	523	231	248
IL22RA1	protein-coding	chr1:24119771-24143179	-	hsa:58985	interleukin 22 receptor, alpha 1	0.905859	0.032173	80	208	239	303
SPPL2A	protein-coding	chr15:50707533-50765713	-	hsa:84888	signal peptide peptidase like 2A	0.76146	0.0150348	517	675	1328	809
LTBR	protein-coding	chr12:6384033-6391571	+	hsa:4055	lymphotoxin beta receptor (TNFR superfamily, member 3)	0.847601	0.00335332	1807	2376	3311	4535
L3MBTL3	protein-coding	chr6:130018583-130141449	+	hsa:84456	l(3)mbt-like 3 (Drosophila)	-1.32888	0.00270792	235	324	171	65
GRID1	protein-coding	chr10:85599555-86366493	-	hsa:2894	glutamate receptor, ionotropic, delta 1	1.38422	0.0226416	49	21	82	120
ANKLE1	protein-coding	chr19:17281645-17287646	+	hsa:126549	ankyrin repeat and LEM domain containing 1	-0.881017	0.00502918	500	634	294	351
LOC101929128	lncRNA	chr8:9188999-9202858	+	hsa:101929128	uncharacterized LOC101929128	3.00604	0.00109954	8	2	40	49
DNAJC9	protein-coding	chr10:73241954-73247331	-	hsa:23234	DnaJ (Hsp40) homolog, subfamily C, member 9	0.707073	0.0108899	681	926	1523	1231
DNAJB1	protein-coding	chr19:14514764-14517862	-	hsa:3337	DnaJ (Hsp40) homolog, subfamily B, member 1	0.596925	0.0301161	5848	7697	9361	12015
DNAJB2	protein-coding	chr2:219279318-219286900	+	hsa:3300	DnaJ (Hsp40) homolog, subfamily B, member 2	0.896896	0.0029702	673	738	1202	1571
DNAJB6	protein-coding	chr7:157337004-157417439	+	hsa:10049	DnaJ (Hsp40) homolog, subfamily B, member 6	0.856423	0.00216582	1027	1455	2734	1980
DNAJA4	protein-coding	chr15:78264647-78282196	+	hsa:55466	DnaJ (Hsp40) homolog, subfamily A, member 4	0.779636	0.00888904	370	440	709	756
SCARNA10	ncRNA	chr12:6510222-6510551	+	hsa:692148	small Cajal body-specific RNA 10	0.796638	0.0105285	1050	1316	1692	2597
TMEM255B	protein-coding	chr13:113759217-113813797	+	hsa:348013	transmembrane protein 255B	1.31001	0.0248689	41	26	73	107
TTC7A	protein-coding	chr2:46941174-47076136	+	hsa:57217	tetratricopeptide repeat domain 7A	0.978398	0.000658351	1010	1019	1997	2256
HILPDA	protein-coding	chr7:128455830-128458418	+	hsa:29923	hypoxia inducible lipid droplet-associated	-1.07745	0.00137246	469	719	240	341
RHBDD2	protein-coding	chr7:75879166-75888926	+	hsa:57414	rhomboid domain containing 2	0.635658	0.0375032	930	1248	1433	2086
MICALL1	protein-coding	chr22:37906176-37942032	+	hsa:85377	MICAL-like 1	1.17976	4.24683e-05	627	820	1528	1896
ATP5G1	protein-coding	chr17:48892786-48895871	+	hsa:516	ATP synthase, H+ transporting, mitochondrial Fo complex, subunit C1 (subunit 9)	-0.652554	0.026619	2207	2494	1338	1811
TNFRSF21	protein-coding	chr6:47267823-47309976	-	hsa:27242	tumor necrosis factor receptor superfamily, member 21	-0.626987	0.0157646	2658	3627	2228	2034
BORCS5	protein-coding	chr12:12357079-12466904	+	hsa:118426	loss of heterozygosity, 12, chromosomal region 1	2.48125	0.0133401	7	7	10	71
BORCS8	protein-coding	chr19:19176904-19192591	-	hsa:729991	MEF2B neighbor	1.19381	0.000689088	167	209	373	526
LOC105370007	lncRNA	chr12:116484427-116488505	-		uncharacterized LOC105370007	-1.00418	0.00259807	389	562	215	277
CAND1	protein-coding	chr12:67269281-67314692	+	hsa:55832	cullin-associated and neddylation-dissociated 1	-0.638943	0.0469362	2779	3852	2975	1524
LOC101929054	ncRNA	chr3:52239238-52241097	+	hsa:101929054	uncharacterized LOC101929054	-1.55004	0.0387415	36	65	9	26
LOC101929056	ncRNA	chr5:1882745-1884649	+	hsa:101929056	uncharacterized LOC101929056	-1.26684	0.0267475	60	83	29	33
TTC22	protein-coding	chr1:54779709-54802379	-	hsa:55001	tetratricopeptide repeat domain 22	1.71514	9.40621e-05	81	64	202	308
GRHL2	protein-coding	chr8:101492469-101668814	+	hsa:79977	grainyhead-like 2 (Drosophila)	-1.26938	0.0267944	64	82	39	25
AJUBA	protein-coding	chr14:22971174-22982642	-	hsa:84962	ajuba LIM protein	0.806173	0.0049198	797	1151	1586	1950
CANT1	protein-coding	chr17:78991716-79009817	-	hsa:124583	calcium activated nucleotidase 1	0.582761	0.0404253	4433	5788	6749	9215
TNFRSF6B	protein-coding	chr20:63696651-63698698	+	hsa:8771	tumor necrosis factor receptor superfamily, member 6b, decoy	1.02082	0.000795906	1117	1596	2301	3399
MTMR11	protein-coding	chr1:149928651-149936898	-	hsa:10903	myotubularin related protein 11	0.733987	0.0246671	240	296	422	513
LINC00152	ncRNA	chr2:87455455-87521518	+	hsa:112597	long intergenic non-protein coding RNA 152	1.4023	1.32502e-05	202	258	568	704
SLCO5A1	protein-coding	chr8:69672333-69835064	-	hsa:81796	solute carrier organic anion transporter family, member 5A1	1.11056	0.000154502	320	466	872	895
KIAA1841	protein-coding	chr2:61065870-61109274	+	hsa:84542	KIAA1841	1.2746	0.0173797	29	47	117	75
LINC00111	ncRNA	chr21:41679302-41697336	+	hsa:54090	long intergenic non-protein coding RNA 111	4.2297	0.0488736	1	0	3	17
KDM1A	protein-coding	chr1:23019814-23083691	+	hsa:23028	lysine (K)-specific demethylase 1A	-0.642111	0.0371202	416	548	333	315
HIST1H1T	protein-coding	chr6:26107412-26108136	-	hsa:3010	histone cluster 1, H1t	1.18477	0.0277315	27	63	87	120
KDM3A	protein-coding	chr2:86442018-86492716	+	hsa:55818	lysine (K)-specific demethylase 3A	-0.762073	0.0193698	935	1146	841	464
HIST1H3A	protein-coding	chr6:26020490-26020958	+	hsa:8350	histone cluster 1, H3a	0.988008	0.00143251	3172	3542	5441	8556
KIAA1804	protein-coding	chr1:233327768-233385148	+	hsa:84451	mixed lineage kinase 4	-0.909529	0.0071834	635	790	521	285
LOC100288798	lncRNA	chr12:46383676-46652579	+	hsa:100288798	uncharacterized LOC100288798	-0.978468	0.0469076	89	132	46	70
GNA15	protein-coding	chr19:3136032-3163769	+	hsa:2769	guanine nucleotide binding protein (G protein), alpha 15 (Gq class)	1.44735	0.002231	49	67	121	207
GNA11	protein-coding	chr19:3094410-3124002	+	hsa:2767	guanine nucleotide binding protein (G protein), alpha 11 (Gq class)	0.838755	0.00269006	2506	2923	4504	5710
SGK223	protein-coding	chr8:8317731-8386242	-	hsa:157285	homolog of rat pragma of Rnd2	0.853246	0.00254501	622	719	1235	1322
JMJD7	protein-coding	chr15:41828085-41837587	+	hsa:100137047	jumonji domain containing 7	1.06852	0.0218343	58	60	117	145
STK39	protein-coding	chr2:167954020-168247541	-	hsa:27347	serine threonine kinase 39	-1.0155	0.00108108	1522	1954	1156	666
NCBP2-AS2	ncRNA	chr3:196942623-196944013	+	hsa:152217	NCBP2 antisense RNA 2 (head to head)	-1.08341	0.000750966	376	516	219	221
CTNNAL1	protein-coding	chr9:108942569-109013594	-	hsa:8727	catenin (cadherin-associated protein), alpha-like 1	0.845988	0.0177536	1195	1278	3339	1450
KIAA1958	protein-coding	chr9:112486968-112665311	+	hsa:158405	KIAA1958	-0.873065	0.00602002	933	1314	817	475
CAPN1	protein-coding	chr11:65181215-65212006	+	hsa:823	calpain 1, (mu/I) large subunit	0.595831	0.0389986	9340	10387	13200	18216
HRCT1	protein-coding	chr9:35906192-35907141	+	hsa:646962	histidine rich carboxyl terminus 1	2.41634	0.034104	8	1	16	38
CAPN6	protein-coding	chrx:111245099-111270546	-	hsa:827	calpain 6	-6.48946	7.46105e-05	33	54	0	1
ZWINT	protein-coding	chr10:56357257-56361302	-	hsa:11130	ZW10 interacting kinetochore protein	1.1879	7.35501e-06	1278	1573	3320	3510
GIPC1	protein-coding	chr19:14477759-14496149	-	hsa:10755	GIPC PDZ domain containing family, member 1	0.805764	0.00638779	3114	3636	5072	7312
PSMD5-AS1	ncRNA	chr9:120843042-120854373	+	hsa:253039	PSMD5 antisense RNA 1 (head to head)	-1.09103	0.0182022	96	154	68	54
HM13	protein-coding	chr20:31514410-31569567	+	hsa:81502	histocompatibility (minor) 13	0.911928	0.00179047	1283	1481	2338	3131
DNPH1	protein-coding	chr6:43225629-43229473	-	hsa:10591	2'-deoxynucleoside 5'-phosphate N-hydrolase 1	-0.700903	0.0286507	729	1062	464	676
MICAL1	protein-coding	chr6:109444062-109455987	-	hsa:64780	microtubule associated monooxygenase, calponin and LIM domain containing 1	0.877779	0.0034921	426	594	870	1080
ATG101	protein-coding	chr12:52069974-52077495	+	hsa:60673	autophagy related 101	0.76236	0.00767605	984	1441	1896	2369
RASL10A	protein-coding	chr22:29312933-29317318	-	hsa:10633	RAS-like, family 10, member A	1.9782	0.00567625	10	23	40	91
URB1	protein-coding	chr21:32311019-32393003	-	hsa:9875	URB1 ribosome biogenesis 1 homolog (S. cerevisiae)	-1.31228	5.19918e-06	1728	1788	854	660
URB2	protein-coding	chr1:229626216-229660200	+	hsa:9816	URB2 ribosome biogenesis 2 homolog (S. cerevisiae)	-0.629264	0.0232133	1026	1229	795	744
AMOTL2	protein-coding	chr3:134355345-134375417	-	hsa:51421	angiomotin like 2	0.98315	0.000369298	1070	1129	2500	2134
CASZ1	protein-coding	chr1:10647213-10694482	-	hsa:54897	castor zinc finger 1	0.974942	0.00687467	144	177	286	375
FRG1HP	miscRNA	chr9:40992337-41014139	+	hsa:100132352	FSHD region gene 1 pseudogene	-1.03887	0.0187676	153	202	122	61
AFMID	protein-coding	chr17:78187401-78207702	+	hsa:125061	arylformamidase	-1.02488	0.000434696	1060	1550	603	728
CHCHD10	protein-coding	chr22:23765834-23767972	-	hsa:400916	coiled-coil-helix-coiled-coil-helix domain containing 10	-3.74188	9.78071e-11	141	151	7	16
CASP7	protein-coding	chr10:113680320-113730905	+	hsa:840	caspase 7, apoptosis-related cysteine peptidase	0.687618	0.029902	457	470	953	647
KIAA1671	protein-coding	chr22:25014435-25197448	+	hsa:85379	KIAA1671	-0.64191	0.0214534	1107	1251	838	764
DANCR	ncRNA	chr4:52712454-52714138	+	hsa:57291	differentiation antagonizing non-protein coding RNA	-1.5815	0.00217279	92	136	52	28
IRAK1	protein-coding	chrx:154010506-154019891	-	hsa:3654	interleukin-1 receptor-associated kinase 1	0.855285	0.00407832	2726	3175	4557	6647
GNAI1	protein-coding	chr7:80135755-80219409	+	hsa:2770	guanine nucleotide binding protein (G protein), alpha inhibiting activity polypeptide 1	-1.25701	0.00032679	1019	1336	712	334
GNAI2	protein-coding	chr3:50246894-50259354	+	hsa:2771	guanine nucleotide binding protein (G protein), alpha inhibiting activity polypeptide 2	0.891945	0.0444042	69	71	136	140
TAS2R3	protein-coding	chr7:141764097-141765197	+	hsa:50831	taste receptor, type 2, member 3	-3.49868	0.0492367	15	5	1	1
LOC105374060	lncRNA	chr3:118508411-118810833	-		uncharacterized LOC105374060	1.24885	0.0448664	26	23	68	57
LYL1	protein-coding	chr19:13099028-13103145	-	hsa:4066	lymphoblastic leukemia associated hematopoiesis regulator 1	1.97972	0.00031578	25	29	86	137
FRRS1	protein-coding	chr1:99708699-99765793	-	hsa:391059	ferric-chelate reductase 1	-1.13789	0.00152967	284	450	211	137
LYST	protein-coding	chr1:235734593-235866927	-	hsa:1130	lysosomal trafficking regulator	-1.39418	0.0419927	62	67	42	11
SCAMP4	protein-coding	chr19:1905374-1926013	+	hsa:113178	secretory carrier membrane protein 4	0.624512	0.0369314	1199	1589	1845	2630
SCAMP5	protein-coding	chr15:74995535-75021495	+	hsa:192683	secretory carrier membrane protein 5	0.870273	0.00942626	214	360	474	605
USP3	protein-coding	chr15:63525936-63594633	+	hsa:9960	ubiquitin specific peptidase 3	-0.727499	0.0110118	1112	1739	1015	778
SCAMP2	protein-coding	chr15:74843730-74873029	-	hsa:10066	secretory carrier membrane protein 2	0.724285	0.0144518	1444	1837	2343	3316
CYB5R3	protein-coding	chr22:42617840-42646989	-	hsa:1727	cytochrome b5 reductase 3	0.991994	0.000525015	3412	4393	6813	9388
CYB5R1	protein-coding	chr1:202961873-202967276	-	hsa:51706	cytochrome b5 reductase 1	0.828016	0.00623527	383	452	719	841
WBP1LP2	pseudo	chr7:107628466-107629547	+		WW domain binding protein 1-like pseudogene 2	2.91228	0.00347209	5	3	32	33
DAG1	protein-coding	chr3:49470132-49535618	+	hsa:1605	dystroglycan 1 (dystrophin-associated glycoprotein 1)	0.729754	0.00592454	6944	8535	12399	14548
KDM5B	protein-coding	chr1:202727404-202807288	-	hsa:10765	lysine (K)-specific demethylase 5B	-1.14244	0.000266043	815	1171	581	364
KDM7A	protein-coding	chr7:140084746-140127521	-	hsa:80853	lysine (K)-specific demethylase 7A	-1.33948	0.00836473	165	278	143	41
MUS81	protein-coding	chr11:65860244-65866439	+	hsa:80198	MUS81 structure-specific endonuclease subunit	0.827973	0.00821883	479	603	835	1172
ATP6V0A4	protein-coding	chr7:138706294-138774037	-	hsa:50617	ATPase, H+ transporting, lysosomal V0 subunit a4	3.06713	5.07504e-05	4	11	74	55
TSPAN18	protein-coding	chr11:44727150-44932318	+	hsa:90139	tetraspanin 18	1.02933	0.000387864	676	832	1433	1794
CYB5D1	protein-coding	chr17:7857967-7864417	+	hsa:124637	cytochrome b5 domain containing 1	-0.667122	0.029131	663	869	605	413
CASD1	protein-coding	chr7:94510058-94557014	+	hsa:64921	CAS1 domain containing 1	-2.35156	0.00504771	21	71	10	8
CNKSR1	protein-coding	chr1:26177491-26189844	+	hsa:10256	connector enhancer of kinase suppressor of Ras 1	0.722051	0.0260215	401	400	613	790
ATP6V0E2	protein-coding	chr7:149872968-149880713	+	hsa:155066	ATPase, H+ transporting V0 subunit e2	0.840588	0.00559491	1200	1612	2114	3121
ATP6V0E1	protein-coding	chr5:172983760-173034897	+	hsa:8992	ATPase, H+ transporting, lysosomal 9kDa, V0 subunit e1	1.01361	0.000708756	953	1391	2039	2859
LOC643201	miscRNA	chr5:176143085-176199295	-	hsa:643201	centrosomal protein 192kDa pseudogene	2.9906	1.63505e-05	4	17	87	81
LMCD1	protein-coding	chr3:8501807-8568125	+	hsa:29995	LIM and cysteine-rich domains 1	1.15425	0.0328549	40	34	92	85
ABCG2	protein-coding	chr4:88090269-88231377	-	hsa:9429	ATP-binding cassette, sub-family G (WHITE), member 2 (Junior blood group)	1.46546	0.00842968	22	48	123	76
ABCC2	protein-coding	chr10:99782621-99830396	+	hsa:1244	ATP-binding cassette, sub-family C (CFTR/MRP), member 2	-1.46355	0.00494517	102	129	61	28
HEATR5B	protein-coding	chr2:36981007-37084340	-	hsa:54497	HEAT repeat containing 5B	-0.824118	0.0238643	364	417	304	167
ABCD1	protein-coding	chrx:153724868-153744762	+	hsa:215	ATP-binding cassette, sub-family D (ALD), member 1	1.20868	0.00082799	253	234	473	724
BTN3A1	protein-coding	chr6:26402237-26415216	+	hsa:11119	butyrophilin, subfamily 3, member A1	-0.830861	0.0314251	199	205	126	116
BTN3A3	protein-coding	chr6:26440472-26453415	+	hsa:10384	butyrophilin, subfamily 3, member A3	-0.806771	0.0136538	321	504	261	229
DBNL	protein-coding	chr7:44044640-44061716	+	hsa:28988	drebrin-like	0.926669	0.0195251	89	156	207	271
SMURF2	protein-coding	chr17:64542282-64661907	-	hsa:64750	SMAD specific E3 ubiquitin protein ligase 2	0.63858	0.0304367	3870	4773	8966	5325
CERCAM	protein-coding	chr9:128421574-128437351	+	hsa:51148	cerebral endothelial cell adhesion molecule	0.731779	0.0166676	956	1144	1493	2161
LINC00431	lncRNA	chr13:110966027-110990602	+		long intergenic non-protein coding RNA 431	-1.04791	0.025602	110	155	87	48
SNRNP200	protein-coding	chr2:96274731-96321893	-	hsa:23020	small nuclear ribonucleoprotein 200kDa (U5)	-0.968146	0.000221535	9641	10593	5979	5024
SPARC	protein-coding	chr5:151661096-151687054	-	hsa:6678	secreted protein, acidic, cysteine-rich (osteonectin)	3.67986	0.000477425	6	0	40	47
SPC24	protein-coding	chr19:11147599-11155812	-	hsa:147841	SPC24, NDC80 kinetochore complex component	0.726425	0.0132083	1436	1978	2461	3408
LINC00493	ncRNA	chr20:18567429-18569560	+	hsa:388789	long intergenic non-protein coding RNA 493	-0.69622	0.0228628	487	689	359	397
MUTYH	protein-coding	chr1:45329242-45339957	-	hsa:4595	mutY homolog	-0.673503	0.034686	826	985	484	706
STMN3	protein-coding	chr20:63639705-63652766	-	hsa:50861	stathmin-like 3	0.587309	0.0430763	2639	3095	3802	5244
ABCB6	protein-coding	chr2:219209766-219218990	-	hsa:10058	ATP-binding cassette, sub-family B (MDR/TAP), member 6 (Langereis blood group)	0.832912	0.00536101	477	633	914	1149
ABCB7	protein-coding	chrx:75053172-75156340	-	hsa:22	ATP-binding cassette, sub-family B (MDR/TAP), member 7	-0.674191	0.0349589	354	496	307	251
BLOC1S4	protein-coding	chr4:6716115-6717660	+	hsa:55330	biogenesis of lysosomal organelles complex-1, subunit 4, cappuccino	-0.857096	0.0499986	128	187	72	108
HINT2	protein-coding	chr9:35812960-35815045	-	hsa:84681	histidine triad nucleotide binding protein 2	0.761993	0.0283544	236	301	383	567
DDA1	protein-coding	chr19:17309574-17323301	+	hsa:79016	DET1 and DDB1 associated 1	0.71049	0.0139068	1385	1927	2411	3220
DDB1	protein-coding	chr11:61299447-61333212	-	hsa:1642	damage-specific DNA binding protein 1, 127kDa	-0.768199	0.00367046	13558	14247	8604	8756
DNAAF5	protein-coding	chr7:726701-786479	+	hsa:54919	HEAT repeat containing 2	-0.658177	0.0138685	2252	3153	1711	1859
NKX3-2	protein-coding	chr4:13540830-13544490	-	hsa:579	NK3 homeobox 2	2.00147	0.000768848	23	18	80	96
IL20RB	protein-coding	chr3:136958143-137011085	+	hsa:53833	interleukin 20 receptor beta	1.76732	0.00015797	44	40	159	147
LINC00341	ncRNA	chr14:95407266-95410090	-	hsa:79686	long intergenic non-protein coding RNA 341	1.71164	0.00100445	38	30	139	102
RGS16	protein-coding	chr1:182598623-182604413	-	hsa:6004	regulator of G-protein signaling 16	-2.32875	2.4675e-05	149	94	26	27
LINC00337	ncRNA	chr1:6236240-6239444	+	hsa:148645	long intergenic non-protein coding RNA 337	1.96697	0.000239637	21	37	97	136
SERPINA1	protein-coding	chr14:94376747-94390692	-	hsa:5265	serpin peptidase inhibitor, clade A (alpha-1 antiproteinase, antitrypsin), member 1	3.78432	4.54608e-18	16	30	306	348
MKX-AS1	lncRNA	chr10:27744615-27767799	+	hsa:101929202	MKX antisense RNA 1	-5.56086	0.0192348	2	16	0	0
ZEB1	protein-coding	chr10:31321135-31529202	+	hsa:6935	zinc finger E-box binding homeobox 1	5.42324	0.0212045	0	0	13	4
TM2D2	protein-coding	chr8:38988808-38996522	-	hsa:83877	TM2 domain containing 2	0.948266	0.000532198	640	922	1647	1499
CNTROB	protein-coding	chr17:7932218-7949578	+	hsa:116840	centrobin, centrosomal BRCA2 interacting protein	0.620123	0.0269674	1365	1613	2170	2644
SPCS2	protein-coding	chr11:74949247-74979031	+	hsa:9789	signal peptidase complex subunit 2 homolog (S. cerevisiae)	0.83677	0.022095	112	164	249	264
TBX21	protein-coding	chr17:47733240-47746122	+	hsa:30009	T-box 21	6.40428	0.000990281	0	0	17	16
HIPK3	protein-coding	chr11:33257322-33357023	+	hsa:10114	homeodomain interacting protein kinase 3	0.787003	0.00489171	1698	2159	4176	2861
SERPINH1	protein-coding	chr11:75562056-75572804	+	hsa:871	serpin peptidase inhibitor, clade H (heat shock protein 47), member 1, (collagen binding protein 1)	0.92927	0.000899363	2924	3505	5602	7249
EP400	protein-coding	chr12:131949920-132080466	+	hsa:57634	E1A binding protein p400	-0.60961	0.0336817	880	979	694	600
SERPING1	protein-coding	chr11:57597554-57614853	+	hsa:710	serpin peptidase inhibitor, clade G (C1 inhibitor), member 1	1.88952	9.40762e-05	42	48	127	222
SERPINE1	protein-coding	chr7:101127087-101136396	+	hsa:5054	serpin peptidase inhibitor, clade E (nexin, plasminogen activator inhibitor type 1), member 1	2.81419	1.03578e-23	541	543	3965	4156
SERPINE2	protein-coding	chr2:223975153-224030273	-	hsa:5270	serpin peptidase inhibitor, clade E (nexin, plasminogen activator inhibitor type 1), member 2	0.789408	0.00274262	2044	2968	4978	4075
SERPINB5	protein-coding	chr18:63476911-63505085	+	hsa:5268	serpin peptidase inhibitor, clade B (ovalbumin), member 5	0.829169	0.0294823	139	177	377	218
SERPINB7	protein-coding	chr18:63777777-63805376	+	hsa:8710	serpin peptidase inhibitor, clade B (ovalbumin), member 7	-5.47712	0.0196057	9	6	0	0
LINC00173	ncRNA	chr12:116533422-116535521	+	hsa:100287569	long intergenic non-protein coding RNA 173	-2.47204	0.000147591	85	107	30	7
LINC00174	ncRNA	chr7:66376044-66400408	-	hsa:285908	long intergenic non-protein coding RNA 174	1.8374	0.0145666	7	23	41	66
EPB41L4B	protein-coding	chr9:109171974-109320446	-	hsa:54566	erythrocyte membrane protein band 4.1 like 4B	4.84064	0.0105511	1	0	17	14
LOC105374363	lncRNA	chr2:27356246-27358664	+		uncharacterized LOC105374363	-1.65972	0.0486356	40	48	26	4
SCARA5	protein-coding	chr8:27869882-27992852	-	hsa:286133	scavenger receptor class A, member 5	5.29035	0.0285622	0	0	4	11
SCARA3	protein-coding	chr8:27633889-27700373	+	hsa:51435	scavenger receptor class A, member 3	1.80851	5.94283e-10	1422	1362	4676	5720
PCSK9	protein-coding	chr1:55039476-55064853	+	hsa:255738	proprotein convertase subtilisin/kexin type 9	0.687607	0.0136946	1611	2128	2791	3494
SH3TC2	protein-coding	chr5:148982150-149063174	-	hsa:79628	SH3 domain and tetratricopeptide repeats 2	1.40911	2.53533e-06	328	423	1225	880
AKAP2	protein-coding	chr9:110125501-110172512	+	hsa:11217	A kinase (PRKA) anchor protein 2	0.959661	0.00449371	1255	1280	3556	1761
LOC100506634	unknown	chr19:58403223-58408466	-	hsa:100506634	hepatocellular carcinoma-associated antigen HCA25a	-0.763169	0.0311139	246	290	162	171
AKAP12	protein-coding	chr6:151341705-151358539	+	hsa:9590	A kinase (PRKA) anchor protein 12	-0.996009	0.00977052	244	307	187	106
DHRS13	protein-coding	chr17:28897781-28903071	-	hsa:147015	dehydrogenase/reductase (SDR family) member 13	0.807457	0.021295	226	371	430	643
GABPB1-AS1	ncRNA	chr15:50354174-50358312	+	hsa:100129387	GABPB1 antisense RNA 1	-1.40799	0.000192766	262	335	147	91
LOC100506691	ncRNA	chr12:122063290-122068560	+	hsa:100506691	uncharacterized LOC100506691	3.96894	0.00339885	2	3	1	78
PTGER1	protein-coding	chr19:14472466-14475362	-	hsa:5731	prostaglandin E receptor 1 (subtype EP1), 42kDa	2.6289	0.0480335	2	3	12	20
HSF1	protein-coding	chr8:144291588-144314720	+	hsa:3297	heat shock transcription factor 1	0.717929	0.0164219	2066	2646	3264	4818
STAT5B	protein-coding	chr17:42199177-42276406	-	hsa:6777	signal transducer and activator of transcription 5B	-1.48561	0.00619441	64	124	38	31
GNGT2	protein-coding	chr17:49206234-49209400	-	hsa:2793	guanine nucleotide binding protein (G protein), gamma transducing activity polypeptide 2	5.16185	0.0357407	0	0	8	6
LOC105376010	lncRNA	chr9:31578604-31744792	+		uncharacterized LOC105376010	-5.6212	0.0149567	12	4	0	0
ABHD8	protein-coding	chr19:17292131-17303473	-	hsa:79575	abhydrolase domain containing 8	0.979791	0.0237302	81	84	145	199
MDGA1	protein-coding	chr6:37632517-37696934	-	hsa:266727	MAM domain containing glycosylphosphatidylinositol anchor 1	1.39999	0.00142685	95	62	228	224
LOC101927476	lncRNA	chrx:40262917-40287721	+	hsa:101927476	uncharacterized LOC101927476	2.41728	0.0373816	0	11	37	20
POLR3G	protein-coding	chr5:90474842-90514555	+	hsa:10622	polymerase (RNA) III (DNA directed) polypeptide G (32kD)	-1.74068	8.30777e-06	659	619	288	127
POLR3E	protein-coding	chr16:22297375-22335103	+	hsa:55718	polymerase (RNA) III (DNA directed) polypeptide E (80kD)	-0.618749	0.0468794	1136	1191	674	929
POLR3A	protein-coding	chr10:77975149-78029540	-	hsa:11128	polymerase (RNA) III (DNA directed) polypeptide A, 155kDa	-0.715695	0.0137663	1458	2070	1351	905
CD3EAP	protein-coding	chr19:45406129-45410737	+	hsa:10849	CD3e molecule, epsilon associated protein	-0.805204	0.00491861	844	974	570	531
CITED1	protein-coding	chrx:72301638-72305914	-	hsa:4435	Cbp/p300-interacting transactivator, with Glu/Asp-rich carboxy-terminal domain, 1	1.94309	1.01885e-06	86	93	281	443
DGKG	protein-coding	chr3:186147201-186362234	-	hsa:1608	diacylglycerol kinase, gamma 90kDa	0.92149	0.00540532	191	230	477	367
TGFB2	protein-coding	chr1:218345334-218444619	+	hsa:7042	transforming growth factor, beta 2	2.5674	0.0154939	4	5	43	14
TGFB1	protein-coding	chr19:41330531-41353933	-	hsa:7040	transforming growth factor, beta 1	1.01245	0.000632501	1386	1697	2692	3817
TGFBI	protein-coding	chr5:136028895-136063818	+	hsa:7045	transforming growth factor, beta-induced, 68kDa	4.4972	2.93005e-06	2	3	43	74
MAFA	protein-coding	chr8:143428060-143430432	-	hsa:389692	v-maf avian musculoaponeurotic fibrosarcoma oncogene homolog A	1.11638	0.0184881	50	69	108	160
POLR1E	protein-coding	chr9:37485935-37503697	+	hsa:64425	polymerase (RNA) I polypeptide E, 53kDa	-0.745817	0.020952	387	445	255	269
POLR1A	protein-coding	chr2:86026328-86106155	-	hsa:25885	polymerase (RNA) I polypeptide A, 194kDa	-0.653823	0.016169	1895	2077	1419	1264
POLR1B	protein-coding	chr2:112541915-112577153	+	hsa:84172	polymerase (RNA) I polypeptide B, 128kDa	-1.15532	1.98897e-05	1620	2163	973	811
KIRREL	protein-coding	chr1:157993616-158100262	+	hsa:55243	kin of IRRE like (Drosophila)	0.910378	0.000891151	770	929	1647	1716
LOC100506844	lncRNA	chr12:57931449-57936164	-	hsa:100506844	uncharacterized LOC100506844	1.52709	0.00261764	37	36	111	113
MAL2	protein-coding	chr8:119208371-119245673	+	hsa:114569	mal, T-cell differentiation protein 2 (gene/pseudogene)	-3.12702	4.91214e-29	3540	4993	600	425
ADAMTSL5	protein-coding	chr19:1505018-1513020	-	hsa:339366	ADAMTS-like 5	1.24271	0.000427421	151	175	351	460
MDH1B	protein-coding	chr2:206737763-206765549	-	hsa:130752	malate dehydrogenase 1B, NAD (soluble)	-1.63114	0.0340363	42	36	12	15
MC1R	protein-coding	chr16:89917879-89920977	+	hsa:4157	melanocortin 1 receptor (alpha melanocyte stimulating hormone receptor)	1.28086	0.00021834	204	273	479	726
MAOB	protein-coding	chrx:43766610-43846627	-	hsa:4129	monoamine oxidase B	-1.47776	7.93382e-08	1331	1653	592	537
MAOA	protein-coding	chrx:43654907-43746824	+	hsa:4128	monoamine oxidase A	-0.823409	0.0352901	214	375	222	124
STRA6	protein-coding	chr15:74179466-74202879	-	hsa:64220	stimulated by retinoic acid 6	5.50029	2.68491e-20	5	6	246	276
SLC43A2	protein-coding	chr17:1569254-1628375	-	hsa:124935	solute carrier family 43 (amino acid system L transporter), member 2	2.42966	0.00221515	5	15	37	71
SLC43A1	protein-coding	chr11:57484531-57515757	-	hsa:8501	solute carrier family 43 (amino acid system L transporter), member 1	-0.717246	0.048074	244	282	152	185
TPRG1L	protein-coding	chr1:3624992-3630131	+	hsa:127262	tumor protein p63 regulated 1-like	0.805918	0.00388163	1168	1343	2128	2500
SPG21	protein-coding	chr15:64963022-64989874	-	hsa:51324	spastic paraplegia 21 (autosomal recessive, Mast syndrome)	-0.621036	0.0259343	2137	2971	1551	1905
CRIPAK	protein-coding	chr4:1391552-1395994	+	hsa:285464	cysteine-rich PAK1 inhibitor	-1.47947	0.0190959	51	88	36	16
HTR7	protein-coding	chr10:90740818-90857914	-	hsa:3363	5-hydroxytryptamine (serotonin) receptor 7, adenylate cyclase-coupled	-1.49394	0.000110413	244	348	139	82
PRR14L	protein-coding	chr22:31681787-31750176	-	hsa:253143	proline rich 14-like	-0.748043	0.0353337	1988	2640	2057	871
IFT172	protein-coding	chr2:27444373-27463525	-	hsa:26160	intraflagellar transport 172	-1.08478	0.0176039	129	128	61	68
MBD3	protein-coding	chr19:1576671-1592761	-	hsa:53615	methyl-CpG binding domain protein 3	0.594491	0.0484407	967	1249	1446	2044
IFT140	protein-coding	chr16:1556107-1610696	-	hsa:9742	intraflagellar transport 140	-0.891544	0.0178989	206	280	120	153
AXIN2	protein-coding	chr17:65528563-65561622	-	hsa:8313	axin 2	1.1551	0.000318314	178	290	560	520
TGIF2	protein-coding	chr20:36573607-36593952	+	hsa:60436	TGFB-induced factor homeobox 2	-0.829963	0.00644395	748	934	436	555
DHX9	protein-coding	chr1:182839304-182887982	+	hsa:1660	DEAH (Asp-Glu-Ala-His) box helicase 9	-0.616994	0.0393439	5414	6868	5389	3105
RNPEPL1	protein-coding	chr2:240568526-240578732	+	hsa:57140	arginyl aminopeptidase (aminopeptidase B)-like 1	0.654445	0.034266	540	726	870	1204
IFITM2	protein-coding	chr11:308107-309410	+	hsa:10581	interferon induced transmembrane protein 2	0.678272	0.0138439	1288	1588	2220	2610
IFITM1	protein-coding	chr11:313991-315272	+	hsa:8519	interferon induced transmembrane protein 1	0.728687	0.0282112	329	374	508	717
CSPG4	protein-coding	chr15:75674322-75712848	-	hsa:1464	chondroitin sulfate proteoglycan 4	0.879187	0.00407453	597	825	1134	1583
SLC7A11	protein-coding	chr4:138170332-138242418	-	hsa:23657	solute carrier family 7 (anionic amino acid transporter light chain, xc- system), member 11	1.0801	0.0052891	812	892	2844	1040
LOC101927780	lncRNA	chr14:61556272-61570194	-	hsa:101927780	uncharacterized LOC101927780	2.04461	0.0027967	10	22	50	84
ZIC2	protein-coding	chr13:99981772-99986765	+	hsa:7546	Zic family member 2	-0.929173	0.00373209	390	574	296	233
SLC44A2	protein-coding	chr19:10602445-10644557	+	hsa:57153	solute carrier family 44 (choline transporter), member 2	0.610441	0.0353009	3493	4483	5269	7437
PLOD1	protein-coding	chr1:11934667-11975542	+	hsa:5351	procollagen-lysine, 2-oxoglutarate 5-dioxygenase 1	0.720746	0.0106897	8209	8588	12935	16395
PLOD3	protein-coding	chr7:101205977-101217730	-	hsa:8985	procollagen-lysine, 2-oxoglutarate 5-dioxygenase 3	0.86824	0.00207499	2312	2613	4170	5306
MCAM	protein-coding	chr11:119308526-119317132	-	hsa:4162	melanoma cell adhesion molecule	2.859	2.59035e-25	1290	1443	9488	11443
MCEE	protein-coding	chr2:71109676-71130264	-	hsa:84693	methylmalonyl CoA epimerase	-1.73232	0.024407	31	49	13	12
UBTD1	protein-coding	chr10:97498882-97571210	+	hsa:80019	ubiquitin domain containing 1	0.88902	0.00586895	500	615	858	1300
CREBL2	protein-coding	chr12:12611833-12645108	+	hsa:1389	cAMP responsive element binding protein-like 2	1.59489	0.0201861	21	18	90	38
MCM7	protein-coding	chr7:100092728-100100780	-	hsa:4176	minichromosome maintenance complex component 7	-0.789061	0.00279728	2279	3065	1593	1642
LOC100506548	ncRNA	chr5:40825262-40829142	-	hsa:100506548	uncharacterized LOC100506548	-1.11023	0.00228454	532	904	465	229
C8orf76	protein-coding	chr8:123219956-123241398	-	hsa:84933	chromosome 8 open reading frame 76	-0.918487	0.0501127	93	150	81	53
SLC45A1	protein-coding	chr1:8318108-8344165	+	hsa:50651	solute carrier family 45, member 1	0.768964	0.0324398	182	203	293	398
C8orf58	protein-coding	chr8:22599601-22604150	+	hsa:541565	chromosome 8 open reading frame 58	0.772852	0.0165654	262	321	469	576
C8orf33	protein-coding	chr8:145052438-145056030	+	hsa:65265	chromosome 8 open reading frame 33	-0.845947	0.00177175	1551	2030	1018	1069
LOC101232810	pseudo	chr22:25177662-25179556	-		stathmin-like 3 pseudogene	0.638971	0.0492232	336	382	507	670
UBAP1L	protein-coding	chr15:65092760-65106656	-	hsa:390595	ubiquitin associated protein 1-like	-2.16096	0.00247005	77	48	22	9
MDN1	protein-coding	chr6:89642775-89723039	-	hsa:23195	MDN1, midasin homolog (yeast)	-1.47756	2.01913e-07	2140	2628	1072	742
RCBTB2	protein-coding	chr13:48488963-48533205	-	hsa:1102	regulator of chromosome condensation (RCC1) and BTB (POZ) domain containing protein 2	1.69869	0.00294767	16	43	98	96
PHF19	protein-coding	chr9:120855696-120901967	-	hsa:26147	PHD finger protein 19	0.741962	0.0108142	1769	2024	2839	3835
TM4SF18	protein-coding	chr3:149318498-149333472	-	hsa:116441	transmembrane 4 L six family member 18	2.73148	2.61602e-13	74	66	588	413
CSRP1	protein-coding	chr1:201483530-201496573	-	hsa:1465	cysteine and glycine-rich protein 1	0.827028	0.00453605	2151	2721	3758	5270
PMS2P9	miscRNA	chr7:77039480-77053038	+	hsa:100132832	postmeiotic segregation increased 2 pseudogene 9	1.21236	0.0486506	31	29	51	96
LOC105376463	lncRNA	chr10:27542835-27580753	+		uncharacterized LOC105376463	2.30022	0.0427345	3	5	22	19
LOC105376481	lncRNA	chr10:31032534-31113931	+		uncharacterized LOC105376481	5.11356	0.00520932	1	0	15	22
FAM92B	protein-coding	chr16:85098352-85112508	-	hsa:339145	family with sequence similarity 92, member B	2.86484	0.0164678	1	6	12	38
MEA1	protein-coding	chr6:43012013-43016886	-	hsa:4201	male-enhanced antigen 1	0.931781	0.00292918	687	646	1185	1526
DKK3	protein-coding	chr11:11962996-12009082	-	hsa:27122	dickkopf WNT signaling pathway inhibitor 3	2.87554	0.0264178	1	4	17	20
DKK1	protein-coding	chr10:52314281-52317657	+	hsa:22943	dickkopf WNT signaling pathway inhibitor 1	1.33319	1.68244e-07	2525	3432	8066	7646
STX11	protein-coding	chr6:144150338-144190556	+	hsa:8676	syntaxin 11	1.47646	0.00395884	32	39	105	103
SH3YL1	protein-coding	chr2:218136-264097	-	hsa:26751	SH3 and SYLF domain containing 1	-0.917127	0.038532	150	145	102	66
GNL3L	protein-coding	chrx:54530211-54567287	+	hsa:54552	guanine nucleotide binding protein-like 3 (nucleolar)-like	-0.593394	0.0211486	3553	4454	2929	2660
SGPL1	protein-coding	chr10:70815948-70880110	+	hsa:8879	sphingosine-1-phosphate lyase 1	0.600852	0.0225594	4605	5647	7651	8683
KIF12	protein-coding	chr9:114091638-114099057	-	hsa:113220	kinesin family member 12	1.67045	0.00013874	53	64	162	228
MCM3AP	protein-coding	chr21:46235125-46285394	-	hsa:8888	minichromosome maintenance complex component 3 associated protein	-0.691514	0.0112489	1776	2038	1378	1128
KIF1C	protein-coding	chr17:4997991-5025656	+	hsa:10749	kinesin family member 1C	0.5931	0.0306497	2166	2544	3404	4074
KIF27	protein-coding	chr9:83832795-83921475	-	hsa:55582	kinesin family member 27	-0.870462	0.0380808	130	167	93	78
SYDE1	protein-coding	chr19:15107364-15114988	+	hsa:85360	synapse defective 1, Rho GTPase, homolog 1 (C. elegans)	2.18577	7.62533e-11	210	203	834	1161
SNORD35B	snoRNA	chr19:49497719-49497806	+	hsa:84546	small nucleolar RNA, C/D box 35B	-1.73348	0.000789414	102	107	37	30
SNORD35A	snoRNA	chr19:49491175-49491260	+	hsa:26816	small nucleolar RNA, C/D box 35A	-2.18607	0.000402942	64	83	19	15
KIF3C	protein-coding	chr2:25926586-25982574	-	hsa:3797	kinesin family member 3C	1.36874	8.32877e-06	263	296	726	799
PAXIP1	protein-coding	chr7:154943690-154998784	-	hsa:22976	PAX interacting (with transcription-activation domain) protein 1	-0.683823	0.018809	729	1080	655	521
DPYSL5	protein-coding	chr2:26898496-26950351	+	hsa:56896	dihydropyrimidinase-like 5	0.676809	0.0313247	489	642	781	1103
DPYSL4	protein-coding	chr10:132187974-132205751	+	hsa:10570	dihydropyrimidinase-like 4	1.09374	0.0086932	121	88	227	256
DPYSL3	protein-coding	chr5:147390808-147453697	-	hsa:1809	dihydropyrimidinase-like 3	-0.607512	0.0256819	1483	1690	1130	1075
DPYSL2	protein-coding	chr8:26514193-26658177	+	hsa:1808	dihydropyrimidinase-like 2	2.84179	0.000206294	11	5	55	70
MYCBP2	protein-coding	chr13:77044657-77327042	-	hsa:23077	MYC binding protein 2, E3 ubiquitin protein ligase	-0.830124	0.0492349	363	439	354	129
C1QL1	protein-coding	chr17:44959693-44968276	-	hsa:10882	complement component 1, q subcomponent-like 1	1.31775	0.0200958	28	69	76	166
LOC101927880	ncRNA	chr10:3433735-3504273	-	hsa:101927880	uncharacterized LOC101927880	-4.4251	0.0366488	4	18	0	1
DLK2	protein-coding	chr6:43450352-43456632	-	hsa:65989	delta-like 2 homolog (Drosophila)	1.57959	0.000313198	61	65	163	234
HNF1B	protein-coding	chr17:37686431-37745059	-	hsa:6928	HNF1 homeobox B	-3.13499	0.00376756	37	19	2	5
C22orf34	protein-coding	chr22:49606325-49620443	-	hsa:348645	chromosome 22 open reading frame 34	-1.7895	5.49482e-06	200	264	76	65
GNPDA1	protein-coding	chr5:142000671-142013027	-	hsa:10007	glucosamine-6-phosphate deaminase 1	-0.717225	0.00713853	2258	2767	1560	1655
CLSTN1	protein-coding	chr1:9729021-9824526	-	hsa:22883	calsyntenin 1	0.608866	0.0260974	4469	5651	7158	8994
TCAF1	protein-coding	chr7:143851377-143882883	-	hsa:9747	family with sequence similarity 115, member A	-0.890534	0.0345133	287	309	244	102
DLX4	protein-coding	chr17:49968970-49974959	+	hsa:1748	distal-less homeobox 4	0.917529	0.0115512	158	197	290	411
DLX3	protein-coding	chr17:49990005-49995224	-	hsa:1747	distal-less homeobox 3	4.2076	0.0014946	0	3	21	34
DYNC1H1	protein-coding	chr14:101964528-102050798	+	hsa:1778	dynein, cytoplasmic 1, heavy chain 1	-0.753381	0.00771937	6504	7979	5535	3580
LOC100506895	lncRNA	chr7:43508728-43522542	-	hsa:100506895	uncharacterized LOC100506895	6.14266	0.00304311	0	0	6	21
P2RX5-TAX1BP3	ncRNA	chr17:3662893-3696404	-	hsa:100533970	P2RX5-TAX1BP3 readthrough (NMD candidate)	0.72386	0.0159831	1040	1452	1765	2506
LOC100506885	ncRNA	chr6:19802164-19804759	-	hsa:100506885	uncharacterized LOC100506885	-1.82057	0.0314845	30	40	15	6
LOC105376266	lncRNA	chr9:123567251-123573588	-		uncharacterized LOC105376266	-2.24959	0.0322856	20	25	6	4
NHSL1	protein-coding	chr6:138422043-138574183	-	hsa:57224	NHS-like 1	0.580215	0.0478914	395	488	708	682
SPTBN2	protein-coding	chr11:66682496-66728047	-	hsa:6712	spectrin, beta, non-erythrocytic 2	-0.835831	0.00759275	404	550	279	280
SPTBN1	protein-coding	chr2:54457197-54669675	+	hsa:6711	spectrin, beta, non-erythrocytic 1	0.940114	0.0456781	45	76	135	106
LOC105376236	lncRNA	chr9:115989341-116017328	+		uncharacterized LOC105376236	-5.45403	0.0203934	8	7	0	0
MAPK11	protein-coding	chr22:50263713-50267949	-	hsa:5600	mitogen-activated protein kinase 11	0.793282	0.0238698	197	260	340	485
FANCF	protein-coding	chr11:22622533-22625841	-	hsa:2188	Fanconi anemia, complementation group F	-0.95409	0.0337011	97	186	79	71
FANCE	protein-coding	chr6:35452339-35467106	+	hsa:2178	Fanconi anemia, complementation group E	-0.622448	0.0418297	724	1027	512	669
PCYT2	protein-coding	chr17:81900965-81911378	-	hsa:5833	phosphate cytidylyltransferase 2, ethanolamine	1.63365	0.000226144	52	92	173	284
MGLL	protein-coding	chr3:127689066-127785463	-	hsa:11343	monoglyceride lipase	0.995107	0.00172541	276	341	572	717
DMTN	protein-coding	chr8:22054817-22082527	+	hsa:2039	dematin actin binding protein	0.953834	0.0015453	948	1375	1925	2733
ADAMTS15	protein-coding	chr11:130448974-130476644	+	hsa:170689	ADAM metallopeptidase with thrombospondin type 1 motif, 15	1.55838	0.0100115	30	23	63	104
DMWD	protein-coding	chr19:45783006-45792802	-	hsa:1762	dystrophia myotonica, WD repeat containing	0.884616	0.00821348	319	348	535	763
SNORD110	snoRNA	chr20:2654212-2654286	+	hsa:692213	small nucleolar RNA, C/D box 110	-1.56502	0.0108122	88	59	23	31
PIK3C3	protein-coding	chr18:41955196-42084606	+	hsa:5289	phosphatidylinositol 3-kinase, catalytic subunit type 3	-1.11396	0.00102577	413	510	275	177
SNORD18C	snoRNA	chr15:66501252-66501318	-	hsa:595100	small nucleolar RNA, C/D box 18C	-2.66701	0.0404284	12	31	7	0
VASP	protein-coding	chr19:45507430-45526983	+	hsa:7408	vasodilator-stimulated phosphoprotein	0.810266	0.00619105	2421	2596	3892	5399
SNORD14B	snoRNA	chr11:17075778-17075868	-	hsa:85388	small nucleolar RNA, C/D box 14B	-0.98471	0.0134003	150	268	119	99
KIFC3	protein-coding	chr16:57758217-57802478	-	hsa:3801	kinesin family member C3	1.04458	0.000850356	346	437	727	962
ZNF3	protein-coding	chr7:100069973-100081762	-	hsa:7551	zinc finger protein 3	-0.826499	0.00785137	537	617	391	300
ZNF8	protein-coding	chr19:58278952-58295888	+	hsa:7554	zinc finger protein 8	-0.943034	0.00498011	360	381	212	198
RPS4Y1	protein-coding	chry:2841582-2866956	+	hsa:6192	ribosomal protein S4, Y-linked 1	-8.44427	1.36375e-07	57	64	0	0
PIK3R4	protein-coding	chr3:130678934-130746852	-	hsa:30849	phosphoinositide-3-kinase, regulatory subunit 4	-0.771856	0.0148654	977	1237	870	505
PIK3R3	protein-coding	chr1:46040140-46132708	-	hsa:8503	phosphoinositide-3-kinase, regulatory subunit 3 (gamma)	2.24881	2.98409e-07	54	73	440	200
HACD1	protein-coding	chr10:17594282-17617374	-	hsa:9200	protein tyrosine phosphatase-like (proline instead of catalytic arginine), member A	0.752146	0.0406485	133	159	237	280
ZNF625-ZNF20	ncRNA	chr19:12131350-12156731	-	hsa:100529855	ZNF625-ZNF20 readthrough (NMD candidate)	-3.27149	0.0389338	12	15	3	0
DOCK4	protein-coding	chr7:111726741-112206394	-	hsa:9732	dedicator of cytokinesis 4	-3.22594	0.00283788	33	36	8	0
DOCK5	protein-coding	chr8:25184723-25415716	+	hsa:80005	dedicator of cytokinesis 5	1.18928	5.05757e-05	805	922	2517	1677
C1orf116	protein-coding	chr1:207018521-207032740	-	hsa:79098	chromosome 1 open reading frame 116	0.716976	0.0254421	275	310	471	544
C1orf122	protein-coding	chr1:37807801-37809454	+	hsa:127687	chromosome 1 open reading frame 122	0.77027	0.01454	303	465	606	749
MIA-RAB4B	ncRNA	chr19:40775537-40796944	+	hsa:100529262	MIA-RAB4B readthrough (NMD candidate)	5.35111	2.45696e-30	6	31	640	870
MICA	protein-coding	chr6:31399784-31415315	+	hsa:100507436	MHC class I polypeptide-related sequence A	1.13137	9.68653e-05	493	618	1166	1385
DOK7	protein-coding	chr4:3463306-3494482	+	hsa:285489	docking protein 7	4.8306	0.00050552	2	0	24	38
MID1	protein-coding	chrx:10454866-11111144	-	hsa:4281	midline 1	0.955565	0.0010888	1230	1502	3438	2186
DOK4	protein-coding	chr16:57471958-57479799	-	hsa:55715	docking protein 4	0.668513	0.0393836	419	390	624	749
ATP13A2	protein-coding	chr1:16985958-17011972	-	hsa:23400	ATPase type 13A2	0.7348	0.0155737	1771	2269	2791	4217
FAM50A	protein-coding	chrx:154444126-154450654	+	hsa:9130	family with sequence similarity 50, member A	0.660484	0.0280783	485	567	791	959
DOLK	protein-coding	chr9:128945530-128947733	-	hsa:22845	dolichol kinase	0.632764	0.0368903	451	558	732	908
RAPGEF5	protein-coding	chr7:22118290-22356914	-	hsa:9771	Rap guanine nucleotide exchange factor (GEF) 5	-0.945748	0.00543281	413	532	321	198
RAPGEF1	protein-coding	chr9:131576770-131676918	-	hsa:2889	Rap guanine nucleotide exchange factor (GEF) 1	0.783932	0.00464815	1768	2367	3311	4114
MIIP	protein-coding	chr1:12019242-12032049	+	hsa:60672	migration and invasion inhibitory protein	0.751854	0.0233176	337	422	541	794
MIOX	protein-coding	chr22:50483988-50489009	+	hsa:55586	myo-inositol oxygenase	0.862802	0.0404918	74	122	156	211
MISP	protein-coding	chr19:754613-764318	+	hsa:126353	mitotic spindle positioning	0.867605	0.0030385	1482	1533	2555	3276
C1orf210	protein-coding	chr1:43281883-43285579	-	hsa:149466	chromosome 1 open reading frame 210	-1.45014	0.00182984	147	234	48	95
C1orf228	protein-coding	chr1:44674706-44725591	+	hsa:339541	chromosome 1 open reading frame 228	5.59664	0.0127708	0	0	12	7
GLIS3-AS1	ncRNA	chr9:3898646-3901248	+	hsa:84850	GLIS3 antisense RNA 1	5.27139	0.028009	0	0	7	8
VTI1A	protein-coding	chr10:112446988-112786282	+	hsa:143187	vesicle transport through interaction with t-SNAREs 1A	-1.10562	0.0015895	340	726	267	238
FAM64A	protein-coding	chr17:6444415-6451065	+	hsa:54478	family with sequence similarity 64, member A	0.985535	0.000628376	1347	1623	2651	3517
DPM3	protein-coding	chr1:155139891-155140407	-	hsa:54344	dolichyl-phosphate mannosyltransferase polypeptide 3	-1.02101	0.00130541	687	1024	367	505
MIR1244-2	ncRNA	chr5:118974640-118974665	+	hsa:100422885	microRNA 1244-2	-1.34828	0.0313408	60	60	21	29
FAM63A	protein-coding	chr1:150996835-151006902	-	hsa:55793	family with sequence similarity 63, member A	1.01292	0.02394	58	68	146	123
LZTS2	protein-coding	chr10:100997065-101007836	+	hsa:84445	leucine zipper, putative tumor suppressor 2	0.745627	0.00903669	1892	2466	3263	4361
LZTS1	protein-coding	chr8:20246165-20261822	-	hsa:11178	leucine zipper, putative tumor suppressor 1	2.01732	3.7114e-09	137	165	538	743
DPP4	protein-coding	chr2:161992241-162074122	-	hsa:1803	dipeptidyl-peptidase 4	-2.92309	0.00118085	47	51	13	1
GEMIN5	protein-coding	chr5:154887416-154938216	-	hsa:25929	gem (nuclear organelle) associated protein 5	-1.08233	9.07421e-05	1837	2310	1183	886
C1orf61	protein-coding	chr1:156404252-156421766	-	hsa:10485	chromosome 1 open reading frame 61	-1.95864	0.000803809	81	94	32	16
C1orf50	protein-coding	chr1:42767245-42775742	+	hsa:79078	chromosome 1 open reading frame 50	0.803821	0.0244845	172	171	300	337
DLGAP1-AS1	ncRNA	chr18:3594114-3597379	+	hsa:649446	DLGAP1 antisense RNA 1	-0.905804	0.0141588	207	253	137	122
SNCAIP	protein-coding	chr5:122312154-122464055	+	hsa:9627	synuclein, alpha interacting protein	-5.38258	0.0244403	5	10	0	0
DPYD	protein-coding	chr1:97077743-97921059	-	hsa:1806	dihydropyrimidine dehydrogenase	-4.21669	0.0117828	4	34	2	0
FAM222A-AS1	ncRNA	chr12:109734209-109773487	-	hsa:84983	FAM222A antisense RNA 1	-1.12444	0.0189078	127	126	49	74
TCEB2	protein-coding	chr16:2771414-2777296	-	hsa:6923	transcription elongation factor B (SIII), polypeptide 2 (18kDa, elongin B)	0.613144	0.0374257	3317	3949	4775	6875
ATG2B	protein-coding	chr14:96285930-96363341	-	hsa:55102	autophagy related 2B	-1.80934	4.54127e-05	135	215	61	43
DOLPP1	protein-coding	chr9:129081104-129090438	+	hsa:57171	dolichyldiphosphatase 1	0.68273	0.0196508	705	786	1148	1379
ATG4A	protein-coding	chrx:108091667-108154671	+	hsa:115201	autophagy related 4A, cysteine peptidase	1.08379	0.00822268	85	92	235	165
TRMT12	protein-coding	chr8:124450807-124453026	+	hsa:55039	tRNA methyltransferase 12 homolog (S. cerevisiae)	-0.651091	0.0451733	344	554	282	309
LOC400706	lncRNA	chr19:46057678-46077629	-		uncharacterized LOC400706	5.14109	0.040146	0	0	11	3
FARSB	protein-coding	chr2:222571743-222656089	-	hsa:10056	phenylalanyl-tRNA synthetase, beta subunit	-0.769217	0.00547637	1539	2206	1305	996
LOC105371870	lncRNA	chr17:68181644-68189296	+		uncharacterized LOC105371870	1.71029	0.0011965	28	32	99	108
PHKA1	protein-coding	chrx:72578814-72714023	-	hsa:5255	phosphorylase kinase, alpha 1 (muscle)	-1.02341	0.000922744	548	694	368	277
PHKA2	protein-coding	chrx:18892300-18984116	-	hsa:5256	phosphorylase kinase, alpha 2 (liver)	-0.682664	0.019651	670	788	481	478
MKL1	protein-coding	chr22:40410289-40533811	-	hsa:57591	megakaryoblastic leukemia (translocation) 1	0.684239	0.0252176	503	692	857	1140
TMSB4X	protein-coding	chrx:12975107-12977227	+	hsa:7114	thymosin beta 4, X-linked	0.876573	0.0014673	1487	1854	2913	3517
HERC1	protein-coding	chr15:63608618-63833961	-	hsa:8925	HECT and RLD domain containing E3 ubiquitin protein ligase family member 1	-0.897901	0.00257537	766	1103	610	441
SPAG5-AS1	ncRNA	chr17:28599133-28617377	+	hsa:100506436	SPAG5 antisense RNA 1	3.43011	0.00612147	2	2	29	17
FGFBP1	protein-coding	chr4:15935569-15938740	-	hsa:9982	fibroblast growth factor binding protein 1	0.813143	0.0496805	118	94	200	202
DRD1	protein-coding	chr5:175440672-175444160	-	hsa:1812	dopamine receptor D1	2.66704	6.38839e-05	16	8	90	77
ID2-AS1	lncRNA	chr2:8670984-8681863	-	hsa:100506299	ID2 antisense RNA 1 (head to head)	-1.13009	0.0311109	72	100	39	43
LOC105371722	lncRNA	chr17:31090896-31093414	-		uncharacterized LOC105371722	5.39694	0.0257582	0	0	2	14
ATG12	protein-coding	chr5:115828196-115841851	-	hsa:9140	autophagy related 12	-2.06223	9.92905e-12	1558	1967	550	344
C12orf66	protein-coding	chr12:64192639-64222296	-	hsa:144577	chromosome 12 open reading frame 66	-1.10488	0.000849485	433	595	303	200
C12orf75	protein-coding	chr12:105330636-105371518	+	hsa:387882	chromosome 12 open reading frame 75	0.6604	0.0166609	664	820	1261	1209
FAM84B	protein-coding	chr8:126552537-126558499	-	hsa:157638	family with sequence similarity 84, member B	-0.622236	0.0388051	731	1089	728	509
RNU5E-6P	pseudo	chr1:44819883-44819997	-		RNA, U5E small nuclear 6, pseudogene	1.0522	0.0175909	62	69	137	150
RNU5E-4P	pseudo	chr1:11909808-11909927	-		RNA, U5E small nuclear 4, pseudogene	1.02548	0.0362225	56	52	102	132
FAM83D	protein-coding	chr20:38938019-38953060	+	hsa:81610	family with sequence similarity 83, member D	0.654536	0.0142786	2263	2775	3902	4429
FAM83B	protein-coding	chr6:54867630-54942631	+	hsa:222584	family with sequence similarity 83, member B	-1.0527	0.0192012	259	404	252	85
MLPH	protein-coding	chr2:237487219-237555318	+	hsa:79083	melanophilin	1.48551	2.43328e-06	235	267	676	806
FAM83H	protein-coding	chr8:143723933-143733657	-	hsa:286077	family with sequence similarity 83, member H	1.49203	0.00112985	53	51	142	169
LOC101927166	ncRNA	chr17:48444833-48466040	+	hsa:101927166	uncharacterized LOC101927166	5.60674	0.0121871	0	0	10	9
FOXRED1	protein-coding	chr11:126269160-126278128	+	hsa:55572	FAD-dependent oxidoreductase domain containing 1	-0.618287	0.0365595	811	928	553	642
CTDSPL	protein-coding	chr3:37896784-37984469	+	hsa:10217	CTD (carboxy-terminal domain, RNA polymerase II, polypeptide A) small phosphatase-like	0.93065	0.0121784	102	162	249	272
FBXO21	protein-coding	chr12:117143473-117188788	-	hsa:23014	F-box protein 21	-0.713249	0.0123733	1117	1525	978	716
FAM13B	protein-coding	chr5:137937909-138033113	-	hsa:51306	family with sequence similarity 13, member B	0.671356	0.029678	322	359	628	524
FAM13A	protein-coding	chr4:88725960-89057195	-	hsa:10144	family with sequence similarity 13, member A	-1.48122	0.000546046	174	277	111	58
HAGHL	protein-coding	chr16:727106-729281	+	hsa:84264	hydroxyacylglutathione hydrolase-like	-1.27605	0.000939145	250	426	113	173
FBXO32	protein-coding	chr8:123497887-123541253	-	hsa:114907	F-box protein 32	-1.50177	0.00298237	102	160	66	31
FBXO31	protein-coding	chr16:87326987-87383793	-	hsa:79791	F-box protein 31	-0.608064	0.0350324	1022	1412	753	910
TTYH2	protein-coding	chr17:74215625-74262020	+	hsa:94015	tweety family member 2	0.746142	0.0191666	414	558	702	994
TTYH3	protein-coding	chr7:2631969-2664802	+	hsa:80727	tweety family member 3	0.934441	0.00366649	815	1112	1459	2360
INHBB	protein-coding	chr2:120346143-120351807	+	hsa:3625	inhibin, beta B	3.3432	1.62839e-05	6	6	81	49
INHBC	protein-coding	chr12:57434685-57452062	+	hsa:3626	inhibin, beta C	-5.17792	0.0394476	8	4	0	0
SPSB4	protein-coding	chr3:141051317-141093884	+	hsa:92369	splA/ryanodine receptor domain and SOCS box containing 4	1.99274	0.0418948	3	11	28	28
SPSB1	protein-coding	chr1:9292882-9369532	+	hsa:80176	splA/ryanodine receptor domain and SOCS box containing 1	0.890895	0.00344281	454	466	846	966
BTBD6	protein-coding	chr14:105248542-105251093	+	hsa:90135	BTB (POZ) domain containing 6	0.800348	0.00561505	901	1146	1631	2097
ACTR3B	protein-coding	chr7:152759767-152862210	+	hsa:57180	ARP3 actin-related protein 3 homolog B (yeast)	-1.029	0.00130731	401	529	229	248
EFHD1	protein-coding	chr2:232638127-232682781	+	hsa:80303	EF-hand domain family, member D1	5.16185	0.0357407	0	0	8	6
TMSB4XP8	pseudo	chr4:90838485-90839115	-	hsa:7117	thymosin beta 4, X-linked pseudogene 8	1.01781	0.0290597	57	77	111	171
OLFML2A	protein-coding	chr9:124777158-124814885	+	hsa:169611	olfactomedin-like 2A	2.16432	2.00248e-13	473	582	2131	2822
SCN1B	protein-coding	chr19:35030688-35037720	+	hsa:6324	sodium channel, voltage-gated, type I, beta subunit	1.58099	1.20311e-05	121	134	348	456
LOC101927027	lncRNA	chr2:178413659-178434091	+	hsa:101927027	uncharacterized LOC101927027	-1.03185	0.0123799	170	191	112	76
IARS	protein-coding	chr9:92210207-92293756	-	hsa:3376	isoleucyl-tRNA synthetase	-0.801111	0.00297808	10415	14508	8785	6240
LOC101927098	ncRNA	chr20:40696499-40717432	-	hsa:101927098	uncharacterized LOC101927098	-6.01771	0.00514673	16	5	0	0
TRIM11	protein-coding	chr1:228393672-228406883	-	hsa:81559	tripartite motif containing 11	0.624389	0.0387199	698	805	1048	1389
TRIM13	protein-coding	chr13:49997007-50018467	+	hsa:10206	tripartite motif containing 13	-0.84983	0.0155234	340	573	326	201
TRIM16	protein-coding	chr17:15627966-15682879	-	hsa:10626	tripartite motif containing 16	0.882512	0.00303163	737	837	1327	1729
SPRY1	protein-coding	chr4:123398700-123403760	+	hsa:10252	sprouty homolog 1, antagonist of FGF signaling (Drosophila)	1.77378	4.11095e-06	91	82	357	279
SCN4B	protein-coding	chr11:118133377-118145469	-	hsa:6330	sodium channel, voltage-gated, type IV, beta subunit	2.62481	0.000761169	12	5	53	62
FAM26E	protein-coding	chr6:116511645-116524792	+	hsa:254228	family with sequence similarity 26, member E	3.19218	0.0250305	0	4	20	16
SPRY4	protein-coding	chr5:142310427-142324417	-	hsa:81848	sprouty homolog 4 (Drosophila)	-1.33994	3.64361e-07	2613	3462	1360	1161
TRIM65	protein-coding	chr17:75888963-75897005	-	hsa:201292	tripartite motif containing 65	-0.596165	0.0273354	1938	2562	1472	1641
ABTB2	protein-coding	chr11:34150987-34358008	-	hsa:25841	ankyrin repeat and BTB (POZ) domain containing 2	1.35318	0.00019375	155	131	392	394
TRIM44	protein-coding	chr11:35662692-35811053	+	hsa:54765	tripartite motif containing 44	0.713355	0.0329307	476	566	1180	641
TRIM47	protein-coding	chr17:75874164-75877828	-	hsa:91107	tripartite motif containing 47	0.778818	0.00923911	1381	1591	2219	3139
TRIM35	protein-coding	chr8:27284886-27311319	-	hsa:23087	tripartite motif containing 35	0.693574	0.0161426	491	670	930	1030
LOC100506302	ncRNA	chr7:155641916-155644406	-	hsa:100506302	uncharacterized LOC100506302	-1.37235	0.0260065	51	75	31	20
DTX1	protein-coding	chr12:113056711-113098028	+	hsa:1840	deltex 1, E3 ubiquitin ligase	5.52061	0.015467	0	0	11	7
SYNGR1	protein-coding	chr22:39349949-39385588	+	hsa:9145	synaptogyrin 1	0.621874	0.0465413	469	631	742	1020
LOC107983997	protein-coding					0.854994	0.0256161	124	162	341	206
LOC107983994	protein-coding					-1.35919	0.0369179	64	71	15	40
SYNGR3	protein-coding	chr16:1989945-1994275	+	hsa:9143	synaptogyrin 3	1.31591	0.000371362	130	135	302	396
COPG2	protein-coding	chr7:130546787-130668758	-	hsa:26958	coatomer protein complex, subunit gamma 2	-1.03992	0.00402282	224	303	147	122
PDE3B	protein-coding	chr11:14643691-14872044	+	hsa:5140	phosphodiesterase 3B, cGMP-inhibited	-2.50532	0.00336489	31	45	8	6
ARHGAP24	protein-coding	chr4:85822847-86001312	+	hsa:83478	Rho GTPase activating protein 24	-5.24935	0.0327663	7	6	0	0
SLIT1	protein-coding	chr10:96998038-97185926	-	hsa:6585	slit homolog 1 (Drosophila)	-2.32521	0.0273273	18	30	7	3
PPP1R12C	protein-coding	chr19:55090913-55117594	-	hsa:54776	protein phosphatase 1, regulatory subunit 12C	0.606442	0.0394259	666	902	1094	1393
ICA1	protein-coding	chr7:8113184-8262612	-	hsa:3382	islet cell autoantigen 1, 69kDa	-1.32251	0.00335057	116	176	72	50
ZFP36	protein-coding	chr19:39406847-39409412	+	hsa:7538	ZFP36 ring finger protein	-0.768358	0.0110676	1233	1967	827	1108
LOC155060	pseudo	chr7:149285281-149297312	+	hsa:155060	AI894139 pseudogene	-1.6302	0.012728	46	82	29	14
PDCD4	protein-coding	chr10:110871795-110900006	+	hsa:27250	programmed cell death 4 (neoplastic transformation inhibitor)	-1.29148	0.00136977	263	303	164	83
VIMP	protein-coding	chr15:101272182-101277520	-	hsa:55829	VCP-interacting membrane protein	1.08036	0.000287553	322	512	1003	830
LOC100506055	pseudo	chr2:161339503-161341385	-	hsa:100506055	matrix-remodelling associated 7 pseudogene	0.755876	0.0164114	592	611	913	1238
LOC101927325	ncRNA	chr7:6505601-6510054	+	hsa:101927325	uncharacterized LOC101927325	-6.02034	0.00421293	9	14	0	0
SYNPO	protein-coding	chr5:150601080-150652341	+	hsa:11346	synaptopodin	0.867564	0.0113684	255	389	485	727
MIR4709	ncRNA	chr14:74480133-74480204	-	hsa:100616211	microRNA 4709	1.23363	0.000428074	212	261	457	705
IQGAP3	protein-coding	chr1:156525405-156572604	-	hsa:128239	IQ motif containing GTPase activating protein 3	0.866563	0.00175505	1158	1618	2403	2865
LOC101927283	ncRNA	chr2:111263734-111291184	+	hsa:101927283	uncharacterized LOC101927283	-3.28998	0.0401941	17	9	3	0
MGAT5B	protein-coding	chr17:76868496-76947795	+	hsa:146664	mannosyl (alpha-1,6-)-glycoprotein beta-1,6-N-acetyl-glucosaminyltransferase, isozyme B	2.95342	1.05093e-12	50	37	336	389
PTPN14	protein-coding	chr1:214353400-214551677	-	hsa:5784	protein tyrosine phosphatase, non-receptor type 14	0.778687	0.00372253	1793	2585	4436	3425
MGAT4A	protein-coding	chr2:98619106-98663473	-	hsa:11320	mannosyl (alpha-1,3-)-glycoprotein beta-1,4-N-acetylglucosaminyltransferase, isozyme A	-1.28634	0.00664842	149	150	88	44
ZCCHC24	protein-coding	chr10:79382325-79445627	-	hsa:219654	zinc finger, CCHC domain containing 24	0.880678	0.00537162	208	281	483	460
ATXN7L3B	protein-coding	chr12:74537771-74541452	+	hsa:552889	ataxin 7-like 3B	-0.598609	0.0214692	2553	3217	2108	1904
ZCCHC12	protein-coding	chrx:118823743-118826973	+	hsa:170261	zinc finger, CCHC domain containing 12	1.33817	0.0149993	29	39	74	105
INPP5E	protein-coding	chr9:136428619-136439861	-	hsa:56623	inositol polyphosphate-5-phosphatase, 72 kDa	0.676033	0.027276	344	428	599	695
INPP4B	protein-coding	chr4:142028028-142846451	-	hsa:8821	inositol polyphosphate-4-phosphatase, type II, 105kDa	0.988391	0.00569881	305	365	946	472
FAM46B	protein-coding	chr1:27005020-27012842	-	hsa:115572	family with sequence similarity 46, member B	1.40001	9.78715e-06	706	818	1659	2559
FAM46A	protein-coding	chr6:81745730-81752711	-	hsa:55603	family with sequence similarity 46, member A	-0.851019	0.0491873	496	619	504	158
MPP7	protein-coding	chr10:28050993-28303066	-	hsa:143098	membrane protein, palmitoylated 7 (MAGUK p55 subfamily member 7)	-2.5733	5.3629e-09	582	768	187	55
MPP5	protein-coding	chr14:67241895-67335819	+	hsa:64398	membrane protein, palmitoylated 5 (MAGUK p55 subfamily member 5)	0.812807	0.0439055	390	311	945	406
MMP19	protein-coding	chr12:55836422-55842971	-	hsa:4327	matrix metallopeptidase 19	2.91087	3.05033e-05	9	9	64	79
FAM43A	protein-coding	chr3:194685893-194689037	+	hsa:131583	family with sequence similarity 43, member A	1.45961	9.18195e-06	153	224	495	582
SYNE3	protein-coding	chr14:95448350-95516693	-	hsa:161176	spectrin repeat containing, nuclear envelope family member 3	1.78502	1.48801e-07	110	138	430	467
LOC101927202	ncRNA	chr22:39091420-39092851	+	hsa:101927202	uncharacterized LOC101927202	7.42957	1.50602e-05	0	0	32	35
CORO6	protein-coding	chr17:29616125-29622906	-	hsa:84940	coronin 6	-1.47945	0.00561174	87	95	31	38
IDUA	protein-coding	chr4:987049-1004519	+	hsa:3425	iduronidase, alpha-L-	1.2575	0.0493599	23	27	46	79
LOC105371224	miscRNA	chr1:148442576-148461504	-		uncharacterized LOC105371224	-2.01885	0.0347483	22	40	13	3
ZBED4	protein-coding	chr22:49853849-49890078	+	hsa:9889	zinc finger, BED-type containing 4	-0.786792	0.00429342	1583	2143	1288	982
FAM86KP	pseudo	chr4:9153296-9159451	+	hsa:100287013	family with sequence similarity 86, member K, pseudogene	-1.83381	0.00434676	51	75	22	15
ZBED2	protein-coding	chr3:111592900-111595335	-	hsa:79413	zinc finger, BED-type containing 2	1.78202	5.7452e-08	137	192	687	501
MMRN2	protein-coding	chr10:86935540-86971311	-	hsa:79812	multimerin 2	-1.8329	4.34569e-05	126	241	60	46
SH3BP4	protein-coding	chr2:234994840-235055648	+	hsa:23677	SH3-domain binding protein 4	1.8124	8.84489e-05	33	50	161	143
METTL8	protein-coding	chr2:171315746-171434109	-	hsa:79828	methyltransferase like 8	-0.882242	0.014668	516	635	446	219
NOTCH3	protein-coding	chr19:15159633-15200920	-	hsa:4854	notch 3	0.937563	0.00337329	314	404	612	824
MIEN1	protein-coding	chr17:39728500-39730563	-	hsa:84299	migration and invasion enhancer 1	-0.958342	0.000966963	1379	2131	836	1031
HIGD2B	pseudo	chr15:72675782-72686149	-	hsa:123346	HIG1 hypoxia inducible domain family, member 2B	-2.63574	0.00662522	24	36	4	6
BBS10	protein-coding	chr12:76344486-76348442	-	hsa:79738	Bardet-Biedl syndrome 10	-1.12992	0.00423269	369	447	276	122
IER2	protein-coding	chr19:13150468-13154908	+	hsa:9592	immediate early response 2	-0.650229	0.0145619	5128	6613	3620	4210
TRAM2-AS1	ncRNA	chr6:52577202-52583993	+	hsa:401264	TRAM2 antisense RNA 1 (head to head)	-1.12242	0.0463381	62	96	49	27
TLDC1	protein-coding	chr16:84478060-84504667	-	hsa:57707	TBC/LysM-associated domain containing 1	0.962069	0.000558523	760	819	1658	1609
MRC2	protein-coding	chr17:62627670-62692467	+	hsa:9902	mannose receptor, C type 2	2.74604	6.74853e-15	151	124	838	1139
MRI1	protein-coding	chr19:13764523-13774282	+	hsa:84245	methylthioribose-1-phosphate isomerase 1	-1.12005	0.000969383	295	464	197	166
DBF4B	protein-coding	chr17:44708635-44752732	+	hsa:80174	DBF4 zinc finger B	0.764129	0.0410495	142	156	234	300
CD164L2	protein-coding	chr1:27379171-27383315	-	hsa:388611	CD164 sialomucin-like 2	-1.23226	0.0291751	63	83	30	35
MT1F	protein-coding	chr16:56657943-56659303	+	hsa:4494	metallothionein 1F	1.67678	0.000169866	65	63	167	266
MT2A	protein-coding	chr16:56608566-56609497	+	hsa:4502	metallothionein 2A	0.702936	0.0203188	6864	8608	10274	16001
MT1X	protein-coding	chr16:56682470-56684196	+	hsa:4501	metallothionein 1X	0.630901	0.0394229	551	780	909	1230
MRRF	protein-coding	chr9:122264603-122323464	+	hsa:92399	mitochondrial ribosome recycling factor	-0.614292	0.0260944	1374	1826	1028	1157
IFI6	protein-coding	chr1:27666061-27672213	-	hsa:2537	interferon, alpha-inducible protein 6	1.64941	3.30334e-06	134	188	426	622
BCL2L1	protein-coding	chr20:31664452-31723999	-	hsa:598	BCL2-like 1	1.00205	0.000389573	5025	6293	10079	13629
MRAP2	protein-coding	chr6:84032621-84090887	+	hsa:112609	melanocortin 2 receptor accessory protein 2	0.877207	0.0237164	96	137	200	245
LOC105371055	lncRNA	chr16:2939511-2955213	-		uncharacterized LOC105371055	-3.10208	0.0491456	6	20	1	2
SBDSP1	pseudo	chr7:72829373-72837399	+	hsa:155370	Shwachman-Bodian-Diamond syndrome pseudogene 1	0.869213	0.0087708	231	328	649	424
KITLG	protein-coding	chr12:88492793-88580473	-	hsa:4254	KIT ligand	-1.84693	1.59948e-07	8893	11983	4359	1804
MSH6	protein-coding	chr2:47783955-47806953	+	hsa:2956	mutS homolog 6	-0.832284	0.0407884	187	183	130	93
NDUFV2-AS1	lncRNA	chr18:9121265-9136720	-	hsa:101927275	NDUFV2 antisense RNA 1	4.07601	0.0149957	0	2	7	26
LOC105371049	lncRNA	chr16:2091436-2095017	+		uncharacterized LOC105371049	1.26856	0.00686743	39	69	127	141
APBB1	protein-coding	chr11:6395125-6419087	-	hsa:322	amyloid beta (A4) precursor protein-binding, family B, member 1 (Fe65)	0.77455	0.0128984	401	482	689	896
C3orf58	protein-coding	chr3:143971828-143992368	+	hsa:205428	chromosome 3 open reading frame 58	-0.947092	0.0261082	281	398	270	103
EFNA5	protein-coding	chr5:107376889-107670895	-	hsa:1946	ephrin-A5	4.0623	3.87829e-29	30	42	678	583
VMAC	protein-coding	chr19:5904841-5910252	+	hsa:400673	vimentin-type intermediate filament associated coiled-coil protein	1.85203	0.00155067	19	32	70	119
DYSF	protein-coding	chr2:71466702-71686763	+	hsa:8291	dysferlin	2.59541	6.15785e-07	15	51	165	233
GATA2	protein-coding	chr3:128479422-128487921	-	hsa:2624	GATA binding protein 2	0.977912	0.00329194	206	310	459	593
MSLN	protein-coding	chr16:760767-768865	+	hsa:10232	mesothelin	0.792014	0.0223607	276	326	432	660
LAPTM4B	protein-coding	chr8:97775581-97852602	+	hsa:55353	lysosomal protein transmembrane 4 beta	-0.790761	0.00240079	10705	16143	7847	8259
COL6A2	protein-coding	chr21:46098119-46129805	+	hsa:1292	collagen, type VI, alpha 2	0.926959	0.00264474	1625	1542	2692	3718
COL6A1	protein-coding	chr21:45981749-46005049	+	hsa:1291	collagen, type VI, alpha 1	1.41693	5.89033e-07	1972	2375	5239	6936
NDST1	protein-coding	chr5:150485784-150558211	+	hsa:3340	N-deacetylase/N-sulfotransferase (heparan glucosaminyl) 1	0.593885	0.0339771	1719	2292	2785	3528
LIMS2	protein-coding	chr2:127638421-127648253	-	hsa:55679	LIM and senescent cell antigen-like domains 2	3.5633	3.50207e-26	82	97	929	1289
PDGFC	protein-coding	chr4:156761611-156971356	-	hsa:56034	platelet derived growth factor C	0.889693	0.0238627	128	154	358	198
RAC2	protein-coding	chr22:37225261-37244299	-	hsa:5880	ras-related C3 botulinum toxin substrate 2 (rho family, small GTP binding protein Rac2)	1.31309	8.35638e-06	1192	1538	2941	4135
PDGFB	protein-coding	chr22:39223359-39245055	-	hsa:5155	platelet-derived growth factor beta polypeptide	2.67717	2.26971e-20	479	512	3008	3698
MSX2	protein-coding	chr5:174724495-174730598	+	hsa:4488	msh homeobox 2	1.73411	4.74679e-07	95	149	444	400
MSX1	protein-coding	chr4:4859665-4863936	+	hsa:4487	msh homeobox 1	1.42568	6.47259e-07	979	1819	3870	3839
CD276	protein-coding	chr15:73683966-73714518	+	hsa:80381	CD276 molecule	0.631126	0.0320433	2939	3117	4184	5731
TPST1	protein-coding	chr7:66205272-66360451	+	hsa:8460	tyrosylprotein sulfotransferase 1	1.22972	1.44131e-05	398	496	1119	1087
ST3GAL2	protein-coding	chr16:70379435-70439088	-	hsa:6483	ST3 beta-galactoside alpha-2,3-sialyltransferase 2	0.910488	0.00261236	431	537	844	1062
LIMD2	protein-coding	chr17:63697806-63700000	-	hsa:80774	LIM domain containing 2	1.35872	0.000460519	112	128	257	389
FAM189A2	protein-coding	chr9:69325547-69392461	+	hsa:9413	family with sequence similarity 189, member A2	1.35313	0.00882048	32	42	96	102
SH3BGR	protein-coding	chr21:39445871-39515506	+	hsa:6450	SH3 domain binding glutamate-rich protein	5.28404	0.0280552	0	0	5	10
ARRDC4	protein-coding	chr15:97960703-97973838	+	hsa:91947	arrestin domain containing 4	-2.36677	1.81351e-10	283	391	76	61
LIMK1	protein-coding	chr7:74093156-74122525	+	hsa:3984	LIM domain kinase 1	0.675937	0.0180232	1958	2408	3135	4171
FBLIM1	protein-coding	chr1:15758758-15775031	+	hsa:54751	filamin binding LIM protein 1	2.43384	5.64635e-12	85	85	470	506
MTOR	protein-coding	chr1:11106531-11262551	-	hsa:2475	mechanistic target of rapamycin (serine/threonine kinase)	-0.589769	0.0313551	1442	1709	1220	997
TAGLN2	protein-coding	chr1:159918107-159924551	-	hsa:8407	transgelin 2	0.773071	0.00659882	3130	3693	5241	7004
TTLL12	protein-coding	chr22:43166622-43187131	-	hsa:23170	tubulin tyrosine ligase-like family, member 12	-0.594965	0.0408595	4825	5621	3034	4230
TTLL11	protein-coding	chr9:121821925-122093606	-	hsa:158135	tubulin tyrosine ligase-like family, member 11	1.1216	0.0444732	41	31	81	88
LBX2-AS1	ncRNA	chr2:74502617-74505065	+	hsa:151534	LBX2 antisense RNA 1	1.17168	0.0384796	31	32	80	71
CD151	protein-coding	chr11:832952-838835	+	hsa:977	CD151 molecule (Raph blood group)	0.661303	0.0246628	4080	5112	6177	9007
CELSR2	protein-coding	chr1:109250019-109275756	+	hsa:1952	cadherin, EGF LAG seven-pass G-type receptor 2	0.622004	0.040229	808	817	1173	1482
CELSR1	protein-coding	chr22:46360834-46537170	-	hsa:9620	cadherin, EGF LAG seven-pass G-type receptor 1	0.907416	0.0018722	594	639	1152	1298
PCDHB13	protein-coding	chr5:141213919-141217421	+	hsa:56123	protocadherin beta 13	5.22185	7.47409e-05	2	0	51	31
RBP7	protein-coding	chr1:9997197-10016020	+	hsa:116362	retinol binding protein 7, cellular	0.644436	0.0341525	552	626	852	1088
MUC1	protein-coding	chr1:155185824-155192915	-	hsa:4582	mucin 1, cell surface associated	2.12021	0.00522697	11	10	43	54
SLC39A13	protein-coding	chr11:47408495-47416500	+	hsa:91252	solute carrier family 39 (zinc transporter), member 13	1.11839	0.000644639	345	349	679	918
COX18	protein-coding	chr4:73054696-73069759	-	hsa:285521	COX18 cytochrome C oxidase assembly factor	-1.02106	0.00575845	234	475	168	188
LOC105371636	lncRNA	chr1:180152608-180154838	-		uncharacterized LOC105371636	3.55086	0.0421655	2	0	6	20
INPP1	protein-coding	chr2:190343470-190371665	+	hsa:3628	inositol polyphosphate-1-phosphatase	0.704067	0.02273	378	378	685	630
HAR1B	ncRNA	chr20:63095493-63102319	-	hsa:768097	highly accelerated region 1B (non-protein coding)	5.88696	0.00550468	0	0	11	12
DCBLD2	protein-coding	chr3:98795970-98901689	-	hsa:131566	discoidin, CUB and LCCL domain containing 2	1.04344	0.000931108	8937	11766	29902	15336
CCNB1IP1	protein-coding	chr14:20311368-20333312	-	hsa:57820	cyclin B1 interacting protein 1, E3 ubiquitin protein ligase	-0.893808	0.00200578	997	1353	602	717
RUNX2	protein-coding	chr6:45328142-45551082	+	hsa:860	runt-related transcription factor 2	2.10133	0.000242621	21	22	120	77
RUNX1	protein-coding	chr21:34821276-35049334	-	hsa:861	runt-related transcription factor 1	2.30961	2.20861e-16	429	536	2909	2148
ULBP3	protein-coding	chr6:150061046-150069147	-	hsa:79465	UL16 binding protein 3	0.763553	0.0321687	259	374	742	390
ULBP2	protein-coding	chr6:149941947-149949235	+	hsa:80328	UL16 binding protein 2	0.904418	0.00513679	235	311	478	589
TCP11L2	protein-coding	chr12:106302780-106347455	+	hsa:255394	t-complex 11, testis-specific-like 2	-1.43964	0.001768	133	226	92	46
PLA2G6	protein-coding	chr22:38115556-38181849	-	hsa:8398	phospholipase A2, group VI (cytosolic, calcium-independent)	-0.955619	0.00566404	292	338	168	175
LRIG3	protein-coding	chr12:58880274-58920540	-	hsa:121227	leucine-rich repeats and immunoglobulin-like domains 3	-0.793712	0.0407716	195	200	129	114
LRIG2	protein-coding	chr1:113091318-113132260	+	hsa:9860	leucine-rich repeats and immunoglobulin-like domains 2	-0.690299	0.0440193	295	374	256	182
SYTL2	protein-coding	chr11:85694275-85720840	-	hsa:54843	synaptotagmin-like 2	1.32281	0.0116302	55	63	234	83
RPS15AP30	pseudo	chr10:112987482-112987864	+		ribosomal protein S15a pseudogene 30	-3.17657	0.0382692	10	16	2	1
CYP24A1	protein-coding	chr20:54153446-54173985	-	hsa:1591	cytochrome P450, family 24, subfamily A, polypeptide 1	-1.60133	8.38166e-09	3641	3812	1229	1379
YEATS2	protein-coding	chr3:183709984-183812624	+	hsa:55689	YEATS domain containing 2	-0.657709	0.0179121	1760	2549	1645	1215
IL15	protein-coding	chr4:141636596-141733987	+	hsa:3600	interleukin 15	1.22064	0.0465254	21	30	61	63
IL32	protein-coding	chr16:3065611-3069667	+	hsa:9235	interleukin 32	-4.69729	3.49495e-13	122	179	3	9
MAN1C1	protein-coding	chr1:25617468-25786207	+	hsa:57134	mannosidase, alpha, class 1C, member 1	1.09983	0.0450688	29	49	72	100
PMF1-BGLAP	protein-coding	chr1:156212988-156243332	+	hsa:100527963	PMF1-BGLAP readthrough	0.629553	0.0400176	608	818	963	1333
TUBB6	protein-coding	chr18:12308059-12326616	+	hsa:84617	tubulin, beta 6 class V	0.977237	0.00033359	2755	3234	5634	6775
FOCAD	protein-coding	chr9:20694540-20995953	+	hsa:54914	focadhesin	-1.34334	0.00589008	107	117	54	40
ATOX1	protein-coding	chr5:151742822-151758649	-	hsa:475	antioxidant 1 copper chaperone	1.39633	8.14696e-06	464	504	1128	1560
SPECC1L-ADORA2A	ncRNA	chr22:24270817-24442360	+	hsa:101730217	SPECC1L-ADORA2A readthrough (NMD candidate)	0.77773	0.0337725	342	409	937	438
KRT16	protein-coding	chr17:41609778-41612827	-	hsa:3868	keratin 16, type I	3.44568	0.00113402	2	4	24	43
KRT18	protein-coding	chr12:52949059-52952901	+	hsa:3875	keratin 18, type I	1.59079	1.31788e-08	47916	53277	139428	182071
LOC105371450	lncRNA	chr1:155196035-155200571	+		uncharacterized LOC105371450	-1.01531	0.0361601	99	112	65	46
KRT80	protein-coding	chr12:52168996-52192000	-	hsa:144501	keratin 80, type II	2.97242	1.75332e-18	121	156	899	1366
KRT81	protein-coding	chr12:52285913-52291515	-	hsa:3887	keratin 81, type II	3.67609	8.04028e-13	14	17	167	247
LOC105371441	lncRNA	chr1:151987230-152010601	+		uncharacterized LOC105371441	1.00309	0.0140839	68	107	182	182
TRL-TAA4-1	tRNA	chr6:27230555-27230637	-		transfer RNA-Leu (TAA) 4-1	-0.689612	0.0197944	5883	8951	3892	5596
HARS2	protein-coding	chr5:140691426-140699318	+	hsa:23438	histidyl-tRNA synthetase 2, mitochondrial	-0.633331	0.0244616	832	1073	692	600
FOXP4-AS1	lncRNA	chr6:41523895-41548621	-	hsa:101060264	FOXP4 antisense RNA 1	-3.01042	0.00419183	36	38	10	0
MXI1	protein-coding	chr10:110210231-110287365	+	hsa:4601	MAX interactor 1, dimerization protein	-2.38597	8.8641e-05	73	90	20	13
OLMALINC	lncRNA	chr10:100373576-100388354	+	hsa:90271	long intergenic non-protein coding RNA 263	-0.730348	0.012963	585	775	432	427
LOC105371393	lncRNA	chr16:86845346-87057730	-		uncharacterized LOC105371393	5.38505	0.0232642	0	0	4	12
SEMA7A	protein-coding	chr15:74409284-74433959	-	hsa:8482	semaphorin 7A, GPI membrane anchor (John Milton Hagen blood group)	1.84624	2.67376e-08	166	191	586	764
SEMA6B	protein-coding	chr19:4542588-4581484	-	hsa:10501	sema domain, transmembrane domain (TM), and cytoplasmic domain, (semaphorin) 6B	0.771146	0.00967137	1378	1907	2394	3426
SEMA6A	protein-coding	chr5:116443555-116574926	-	hsa:57556	sema domain, transmembrane domain (TM), and cytoplasmic domain, (semaphorin) 6A	-1.80857	0.00169428	81	111	41	17
SEMA3C	protein-coding	chr7:80742538-80919184	-	hsa:10512	sema domain, immunoglobulin domain (Ig), short basic domain, secreted, (semaphorin) 3C	-2.58778	8.72134e-08	264	326	81	24
SEMA3B	protein-coding	chr3:50273119-50277171	+	hsa:7869	sema domain, immunoglobulin domain (Ig), short basic domain, secreted, (semaphorin) 3B	2.95947	7.25806e-09	12	33	180	176
SEMA3A	protein-coding	chr7:83956846-84316813	-	hsa:10371	sema domain, immunoglobulin domain (Ig), short basic domain, secreted, (semaphorin) 3A	2.78142	1.03494e-12	118	176	1510	624
SYVN1	protein-coding	chr11:65128382-65135178	-	hsa:84447	synovial apoptosis inhibitor 1, synoviolin	0.854894	0.0106519	351	371	566	813
NSFL1C	protein-coding	chr20:1442166-1467720	-	hsa:55968	NSFL1 (p97) cofactor (p47)	0.580465	0.0406675	2333	2540	3413	4288
IL17RB	protein-coding	chr3:53846494-53866526	+	hsa:55540	interleukin 17 receptor B	0.940428	0.0057413	146	249	414	370
IL17RA	protein-coding	chr22:17084959-17115694	+	hsa:23765	interleukin 17 receptor A	1.10171	0.0195002	44	68	113	136
IL17RD	protein-coding	chr3:57089982-57142486	-	hsa:54756	interleukin 17 receptor D	3.84135	1.16191e-45	630	967	13533	10340
COL9A2	protein-coding	chr1:40300491-40317267	-	hsa:1298	collagen, type IX, alpha 2	1.66094	8.94673e-05	73	62	207	250
SNORA9	snoRNA	chr7:44985378-44985510	-	hsa:677798	small nucleolar RNA, H/ACA box 9	-1.20032	0.0480372	64	115	21	58
SNORA6	snoRNA	chr3:39408391-39408539	+	hsa:574040	small nucleolar RNA, H/ACA box 6	-1.49725	0.0129014	51	88	29	22
MYL6	protein-coding	chr12:56158261-56161582	+	hsa:4637	myosin, light chain 6, alkali, smooth muscle and non-muscle	0.885031	0.00143239	3978	5500	7939	10264
MYL9	protein-coding	chr20:36541484-36549823	+	hsa:10398	myosin, light chain 9, regulatory	1.51002	4.58959e-07	681	982	2054	2853
RFX3	protein-coding	chr9:3223161-3525992	-	hsa:5991	regulatory factor X, 3 (influences HLA class II expression)	-1.02698	0.00553773	250	357	193	120
CUEDC1	protein-coding	chr17:57861598-57955292	-	hsa:404093	CUE domain containing 1	1.65033	1.46492e-09	1281	1501	4240	4956
MYLK	protein-coding	chr3:123614023-123793844	-	hsa:4638	myosin light chain kinase	1.74088	0.00150777	27	30	125	78
LOC105375666	lncRNA	chr8:98996760-99013039	-		uncharacterized LOC105375666	-5.87804	0.00755377	4	18	0	0
NRARP	protein-coding	chr9:137299631-137302251	-	hsa:441478	NOTCH-regulated ankyrin repeat protein	-0.869039	0.00834202	342	504	224	257
THAP8	protein-coding	chr19:36034985-36054762	-	hsa:199745	THAP domain containing 8	1.25229	0.0209265	38	33	86	95
THAP7	protein-coding	chr22:20999772-21002115	-	hsa:80764	THAP domain containing 7	0.668282	0.0269801	623	755	987	1309
MINCR	lncRNA	chr8:143280155-143281700	-	hsa:100507316	uncharacterized LOC100507316	-2.07423	3.7069e-06	151	246	39	58
LOC107987072	lncRNA					-2.07733	4.72098e-08	303	388	70	101
IP6K2	protein-coding	chr3:48688003-48717195	-	hsa:51447	inositol hexakisphosphate kinase 2	-0.595301	0.0293718	1118	1596	967	908
FSTL4	protein-coding	chr5:133194827-133612510	-	hsa:23105	follistatin-like 4	5.14807	0.0381469	0	0	10	4
FSTL3	protein-coding	chr19:676389-683392	+	hsa:10272	follistatin-like 3 (secreted glycoprotein)	1.68014	1.05626e-07	464	599	1412	2137
FSTL1	protein-coding	chr3:120394214-120451071	-	hsa:11167	follistatin-like 1	1.43943	0.000255189	88	195	482	305
VWA5B2	protein-coding	chr3:184229593-184242329	+	hsa:90113	von Willebrand factor A domain containing 5B2	1.20499	0.007627	52	76	130	176
ACBD7	protein-coding	chr10:15075475-15088776	-	hsa:414149	acyl-CoA binding domain containing 7	1.16382	0.000730505	185	375	752	537
LRP1B	protein-coding	chr2:140231423-142132463	-	hsa:53353	low density lipoprotein receptor-related protein 1B	-6.12659	0.00341042	16	7	0	0
FLYWCH2	protein-coding	chr16:2882891-2899365	+	hsa:114984	FLYWCH family member 2	0.711083	0.0207872	460	512	747	932
KIAA0513	protein-coding	chr16:85027709-85094230	+	hsa:9764	KIAA0513	1.16912	0.00864561	89	77	156	242
RPUSD4	protein-coding	chr11:126202094-126211692	-	hsa:84881	RNA pseudouridylate synthase domain containing 4	-0.65157	0.0174499	1062	1401	866	780
RGP1	protein-coding	chr9:35749280-35753267	+	hsa:9827	RGP1 retrograde golgi transport homolog (S. cerevisiae)	0.684689	0.0223592	542	633	886	1101
CCDC80	protein-coding	chr3:112604386-112641143	-	hsa:151887	coiled-coil domain containing 80	2.63764	0.0120564	4	4	30	23
CCDC97	protein-coding	chr19:41309855-41321016	+	hsa:90324	coiled-coil domain containing 97	0.921268	0.00229507	568	618	1049	1324
RGS2	protein-coding	chr1:192809039-192812277	+	hsa:5997	regulator of G-protein signaling 2	-1.71907	9.45134e-06	210	299	93	69
RGS9	protein-coding	chr17:65137338-65210662	+	hsa:8787	regulator of G-protein signaling 9	1.84519	0.00511205	10	36	62	102
THADA	protein-coding	chr2:43230851-43596046	-	hsa:63892	thyroid adenoma associated	-1.1922	0.046228	51	85	39	23
RNF167	protein-coding	chr17:4940008-4945223	+	hsa:26001	ring finger protein 167	0.629238	0.0328894	2250	2815	3363	4823
CD79B	protein-coding	chr17:63928738-63932344	-	hsa:974	CD79b molecule, immunoglobulin-associated beta	2.63583	0.000282645	7	12	54	68
RNF141	protein-coding	chr11:10511678-10541227	-	hsa:50862	ring finger protein 141	-1.25449	2.95548e-05	2246	3014	1455	873
SNORD73B	pseudo	chr4:151101957-151102231	+		small nucleolar RNA, C/D box U73B (pseudogene)	-2.26312	0.0298689	14	50	2	11
LOC105375568	lncRNA	chr7:151025285-151028267	-		uncharacterized LOC105375568	3.6932	0.0259622	2	0	14	15
GALNT18	protein-coding	chr11:11270874-11622045	-	hsa:374378	polypeptide N-acetylgalactosaminyltransferase 18	-1.0128	0.0111254	185	192	104	95
GALNT14	protein-coding	chr2:30898690-31079169	-	hsa:79623	polypeptide N-acetylgalactosaminyltransferase 14	-5.97459	4.19959e-19	210	265	7	1
GALNT10	protein-coding	chr5:154190735-154420984	+	hsa:55568	polypeptide N-acetylgalactosaminyltransferase 10	1.14858	0.038551	28	46	70	99
ADGRV1	protein-coding	chr5:90558681-91164223	+	hsa:84059	G protein-coupled receptor 98	-2.33056	0.0035097	33	54	11	7
RNF128	protein-coding	chrx:106693838-106797016	+	hsa:79589	ring finger protein 128, E3 ubiquitin protein ligase	-1.20729	0.0317241	69	88	46	26
ING4	protein-coding	chr12:6650538-6663142	-	hsa:51147	inhibitor of growth family, member 4	-1.00716	0.0357453	134	163	51	103
RPL10P13	pseudo	chr12:75688725-75689087	-		ribosomal protein L10 pseudogene	-2.47184	0.00260072	29	58	7	9
CCDC57	protein-coding	chr17:82111275-82196678	-	hsa:284001	coiled-coil domain containing 57	-0.62427	0.0459901	1032	1130	615	864
CCDC69	protein-coding	chr5:151181052-151224093	-	hsa:26112	coiled-coil domain containing 69	0.683705	0.0335401	223	298	418	457
RNF19B	protein-coding	chr1:32936446-32964813	-	hsa:127544	ring finger protein 19B	0.798204	0.00350851	886	1083	1736	1865
SCYL3	protein-coding	chr1:169853089-169893959	-	hsa:57147	SCY1-like 3 (S. cerevisiae)	-0.952425	0.0266785	141	173	105	67
RNF182	protein-coding	chr6:13925193-13980009	+	hsa:221687	ring finger protein 182	2.48005	0.0480298	4	3	37	6
RNF181	protein-coding	chr2:85595714-85597708	+	hsa:51255	ring finger protein 181	0.728092	0.0215932	883	893	1273	1843
TUBB2BP1	pseudo	chr6:3177042-3179714	-		tubulin, beta 2B class IIb pseudogene 1	1.88362	0.0289126	5	14	34	37
CCDC18	protein-coding	chr1:93180507-93246076	+	hsa:343099	coiled-coil domain containing 18	1.38608	0.0415382	19	18	50	53
CCDC33	protein-coding	chr15:74216650-74336141	+	hsa:80125	coiled-coil domain containing 33	3.25455	0.0050114	6	0	24	41
SH3PXD2A-AS1	ncRNA	chr10:103746779-103755409	+	hsa:100505839	SH3PXD2A antisense RNA 1	4.37094	2.27768e-10	3	8	110	124
SLC2A1-AS1	ncRNA	chr1:42959049-42983358	+	hsa:440584	SLC2A1 antisense RNA 1	1.33357	0.012886	40	32	108	88
ADGRG1	protein-coding	chr16:57628226-57665039	+	hsa:9289	G protein-coupled receptor 56	1.00836	0.000570183	646	825	1358	1736
INTU	protein-coding	chr4:127664804-127716776	+	hsa:27152	inturned planar cell polarity protein	-1.06163	0.0195996	166	250	149	61
ADGRF1	protein-coding	chr6:46997708-47027761	-	hsa:266977	G protein-coupled receptor 110	-2.92798	8.67723e-24	1297	1655	230	179
INSR	protein-coding	chr19:7112257-7294405	-	hsa:3643	insulin receptor	-0.624407	0.0341112	1094	1581	1087	733
RHOG	protein-coding	chr11:3826978-3830646	-	hsa:391	ras homolog family member G	0.678588	0.0267672	947	1184	1447	2116
RHOC	protein-coding	chr1:112701127-112707056	-	hsa:389	ras homolog family member C	1.07947	0.000211527	4672	5042	9116	12558
SULF2	protein-coding	chr20:47657406-47786064	-	hsa:55959	sulfatase 2	1.6965	1.01565e-07	146	195	572	585
PCDHGB7	protein-coding	chr5:141417647-141420429	+	hsa:56099	protocadherin gamma subfamily B, 7	2.877	0.00476874	6	2	36	29
CRELD1	protein-coding	chr3:9933788-9945399	+	hsa:78987	cysteine-rich with EGF-like domains 1	0.673926	0.0423829	356	509	572	857
EBPL	protein-coding	chr13:49660676-49691487	-	hsa:84650	emopamil binding protein-like	-0.952551	0.00133755	591	840	382	389
ADGRA2	protein-coding	chr8:37796883-37843986	+	hsa:25960	G protein-coupled receptor 124	0.962702	0.00589396	194	258	375	542
ADGRB2	protein-coding	chr1:31727105-31757643	-	hsa:576	brain-specific angiogenesis inhibitor 2	0.929325	0.00764243	195	224	357	482
ADGRA3	protein-coding	chr4:22393046-22516058	-	hsa:166647	G protein-coupled receptor 125	-0.627576	0.0315149	1152	1493	1076	732
ABLIM3	protein-coding	chr5:149141483-149260439	+	hsa:22885	actin binding LIM protein family, member 3	0.731343	0.0126133	712	856	1208	1525
LOC107987284	lncRNA					6.22752	0.00188991	0	0	12	17
LOC107987281	lncRNA					6.2457	0.00197865	0	0	22	8
LOC107987279	lncRNA					-0.61877	0.038574	2149	3288	1517	2136
MIR21	ncRNA	chr17:59841311-59841331	+	hsa:406991	microRNA 21	-1.55919	0.00367274	96	160	66	25
SH3BGRL3	protein-coding	chr1:26279722-26281522	+	hsa:83442	SH3 domain binding glutamate-rich protein like 3	1.15299	0.000133187	2659	3939	6055	9096
SH3BGRL2	protein-coding	chr6:79631105-79703670	+	hsa:83699	SH3 domain binding glutamate-rich protein like 2	-3.28327	5.77184e-13	194	259	30	19
ECE1	protein-coding	chr1:21217250-21345132	-	hsa:1889	endothelin converting enzyme 1	1.02614	9.56393e-05	3085	3952	7055	7959
RILP	protein-coding	chr17:1646150-1650098	-	hsa:83547	Rab interacting lysosomal protein	3.22952	0.00303469	6	2	11	70
BCAP29	protein-coding	chr7:107579981-107623317	+	hsa:55973	B-cell receptor-associated protein 29	1.04808	0.00720507	246	300	848	358
ECM1	protein-coding	chr1:150508011-150513789	+	hsa:1893	extracellular matrix protein 1	2.31237	1.14978e-08	65	64	277	401
CACNA2D2	protein-coding	chr3:50362613-50503597	-	hsa:9254	calcium channel, voltage-dependent, alpha 2/delta subunit 2	0.754714	0.0114801	390	522	744	863
NANOS1	protein-coding	chr10:119029716-119033732	+	hsa:340719	nanos homolog 1 (Drosophila)	1.47659	0.00893359	25	36	71	105
MIPEP	protein-coding	chr13:23730189-23889448	-	hsa:4285	mitochondrial intermediate peptidase	-1.14288	0.035694	61	109	35	44
CBWD5	protein-coding	chr9:65675874-65734041	+	hsa:220869	COBW domain containing 5	-0.746663	0.0351526	243	307	197	149
IPO5	protein-coding	chr13:97953641-98024279	+	hsa:3843	importin 5	-0.803584	0.00692288	1047	1452	905	601
IPO4	protein-coding	chr14:24180219-24188918	-	hsa:79711	importin 4	-0.674625	0.0181112	2749	3074	1692	2156
EDAR	protein-coding	chr2:108894471-108965798	-	hsa:10913	ectodysplasin A receptor	1.7545	0.00764648	16	29	116	43
EDF1	protein-coding	chr9:136862669-136866336	-	hsa:8721	endothelial differentiation-related factor 1	0.667114	0.0213453	1064	1095	1671	1969
SNORD58B	snoRNA	chr18:49491664-49491729	-	hsa:26790	small nucleolar RNA, C/D box 58B	-0.730305	0.0118337	898	1396	673	758
THBS1	protein-coding	chr15:39581083-39597467	+	hsa:7057	thrombospondin 1	2.73338	1.52705e-24	433	538	3633	3175
VWA1	protein-coding	chr1:1435523-1442882	+	hsa:64856	von Willebrand factor A domain containing 1	0.664371	0.0365868	537	684	818	1201
EDN1	protein-coding	chr6:12288407-12297194	+	hsa:1906	endothelin 1	2.32541	0.0475785	1	8	30	15
MED11	protein-coding	chr17:4731408-4733610	+	hsa:400569	mediator complex subunit 11	-1.01905	0.049033	64	126	48	48
CYP26B1	protein-coding	chr2:72129238-72144532	-	hsa:56603	cytochrome P450, family 26, subfamily B, polypeptide 1	0.979156	0.000819816	350	537	917	899
CD99L2	protein-coding	chrx:150766336-150898816	-	hsa:83692	CD99 molecule-like 2	0.683468	0.0477214	183	237	313	392
MED19	protein-coding	chr11:57703709-57712323	-	hsa:219541	mediator complex subunit 19	0.734656	0.0227894	268	300	462	536
VWDE	protein-coding	chr7:12330885-12403903	-	hsa:221806	von Willebrand factor D and EGF domains	-1.70977	4.17155e-05	163	268	81	56
MED27	protein-coding	chr9:131865218-132079866	-	hsa:9442	mediator complex subunit 27	0.704614	0.0172048	917	1194	1523	2066
ISCA2	protein-coding	chr14:74493720-74495568	+	hsa:122961	iron-sulfur cluster assembly 2	0.758449	0.0114304	640	866	1135	1517
LOC105375237	lncRNA	chr7:39513311-39522502	-		uncharacterized LOC105375237	-5.10844	0.0483917	2	11	0	0
LRRN2	protein-coding	chr1:204617173-204685353	-	hsa:10446	leucine rich repeat neuronal 2	0.946962	0.0103594	141	133	288	277
SURF4	protein-coding	chr9:133361449-133376166	-	hsa:6836	surfeit 4	0.940716	0.0097207	160	196	294	421
SURF2	protein-coding	chr9:133356545-133361165	+	hsa:6835	surfeit 2	2.32312	0.0162001	12	5	13	79
SHARPIN	protein-coding	chr8:144098637-144104265	-	hsa:81858	SHANK-associated RH domain interactor	0.635051	0.0496101	534	678	778	1185
APLP1	protein-coding	chr19:35868445-35879795	+	hsa:333	amyloid beta (A4) precursor-like protein 1	0.960109	0.00239585	563	509	1009	1222
VPRBP	protein-coding	chr3:51395869-51500015	-	hsa:9730	Vpr (HIV-1) binding protein	-0.659363	0.0268044	1671	2084	1554	967
VPS18	protein-coding	chr15:40898710-40903975	+	hsa:57617	vacuolar protein sorting 18 homolog (S. cerevisiae)	0.657169	0.0190316	882	1024	1490	1679
COL4A5	protein-coding	chrx:108439844-108697545	+	hsa:1287	collagen, type IV, alpha 5	-1.42807	0.00125584	131	160	59	55
ENOSF1	protein-coding	chr18:670322-706578	-	hsa:55556	enolase superfamily member 1	-1.20408	0.000154836	444	709	287	233
THEM6	protein-coding	chr8:142727203-142736932	+	hsa:51337	thioesterase superfamily member 6	-0.860311	0.00801383	605	851	342	490
MTHFD1	protein-coding	chr14:64388041-64460007	+	hsa:4522	methylenetetrahydrofolate dehydrogenase (NADP+ dependent) 1, methenyltetrahydrofolate cyclohydrolase, formyltetrahydrofolate synthetase	-0.751493	0.0042776	4536	5297	3416	2776
ZNF512B	protein-coding	chr20:63956704-63969870	-	hsa:57473	zinc finger protein 512B	1.11084	0.000875782	269	295	539	745
FOLR1	protein-coding	chr11:72189915-72196323	+	hsa:2348	folate receptor 1 (adult)	1.3061	0.000810842	79	111	220	269
IL10RB	protein-coding	chr21:33266360-33297234	+	hsa:3588	interleukin 10 receptor, beta	0.584579	0.038681	826	898	1328	1412
CKS1B	protein-coding	chr1:154974642-154979249	+	hsa:1163	CDC28 protein kinase regulatory subunit 1B	0.793887	0.00629674	1132	1475	2017	2699
IRS2	protein-coding	chr13:109753837-109786567	-	hsa:8660	insulin receptor substrate 2	0.831788	0.0184123	149	207	392	274
NEURL1B	protein-coding	chr5:172641266-172691540	+	hsa:54492	neuralized E3 ubiquitin protein ligase 1B	3.11685	0.0393352	2	1	11	17
SPRY4-IT1	lncRNA	chr5:142317620-142318322	-		SPRY4 intronic transcript 1 (non-protein coding)	-2.0981	0.00433427	35	65	12	12
MEF2C	protein-coding	chr5:88720282-88889324	-	hsa:4208	myocyte enhancer factor 2C	-2.79063	2.26419e-05	104	128	31	5
CAMKK2	protein-coding	chr12:121237692-121293274	-	hsa:10645	calcium/calmodulin-dependent protein kinase kinase 2, beta	-0.651765	0.0157324	1727	2343	1300	1406
CAMKK1	protein-coding	chr17:3880350-3890974	-	hsa:84254	calcium/calmodulin-dependent protein kinase kinase 1, alpha	-0.804247	0.0205267	256	340	170	187
P4HA3	protein-coding	chr11:74266655-74311654	-	hsa:283208	prolyl 4-hydroxylase, alpha polypeptide III	1.88669	0.0307372	3	23	31	62
P4HA2	protein-coding	chr5:132192610-132227863	-	hsa:8974	prolyl 4-hydroxylase, alpha polypeptide II	0.603124	0.0310215	933	989	1660	1450
NINJ1	protein-coding	chr9:93121496-93134304	-	hsa:4814	ninjurin 1	0.608703	0.046414	757	977	1141	1617
AES	protein-coding	chr19:3052910-3063107	-	hsa:166	amino-terminal enhancer of split	0.611652	0.0304654	3733	4570	5695	7597
LOC105375822	lncRNA	chr8:48514073-48524251	-		uncharacterized LOC105375822	5.07272	0.0435394	0	0	5	8
AK1	protein-coding	chr9:127866480-127877743	-	hsa:203	adenylate kinase 1	0.804972	0.00575985	795	1149	1543	1980
AK4	protein-coding	chr1:65148167-65232145	+	hsa:205	adenylate kinase 4	0.655717	0.0414527	236	278	420	434
GSTM2	protein-coding	chr1:109668022-109683997	+	hsa:2946	glutathione S-transferase mu 2 (muscle)	3.59292	0.0432702	0	2	13	11
ZBTB4	protein-coding	chr17:7459366-7484249	-	hsa:57659	zinc finger and BTB domain containing 4	0.910401	0.000845238	761	1024	1707	1801
PMP22	protein-coding	chr17:15229777-15260844	-	hsa:5376	peripheral myelin protein 22	1.13431	2.19299e-05	780	1024	2179	1979
NAGK	protein-coding	chr2:71068662-71078641	+	hsa:55577	N-acetylglucosamine kinase	0.93287	0.00454812	173	264	422	444
C1R	protein-coding	chr12:7080209-7092447	-	hsa:715	complement component 1, r subcomponent	1.36576	0.000579499	95	84	254	241
EGR1	protein-coding	chr5:138465492-138469315	+	hsa:1958	early growth response 1	-0.785764	0.00326355	1874	2707	1382	1386
ORAI2	protein-coding	chr7:102433530-102456821	+	hsa:80228	ORAI calcium release-activated calcium modulator 2	0.772168	0.00903207	397	560	799	903
NAIP	protein-coding	chr5:70968483-71025114	-	hsa:4671	NLR family, apoptosis inhibitory protein	-0.846514	0.0178154	241	321	190	139
ARC	protein-coding	chr8:142611044-142614472	-	hsa:23237	activity-regulated cytoskeleton-associated protein	1.49031	7.40784e-06	347	359	842	1254
ARX	protein-coding	chrx:25003694-25015948	-	hsa:170302	aristaless related homeobox	1.91511	0.0326819	4	14	30	38
NANS	protein-coding	chr9:98060925-98083083	+	hsa:54187	N-acetylneuraminic acid synthase	0.913543	0.000782033	1202	1629	2594	2971
EXOC7	protein-coding	chr17:76081011-76104221	-	hsa:23265	exocyst complex component 7	0.929544	0.00057904	2401	2795	4827	5601
AUH	protein-coding	chr9:91336582-91361945	-	hsa:549	AU RNA binding protein/enoyl-CoA hydratase	-0.66246	0.0479515	327	433	297	209
NAPA	protein-coding	chr19:47487634-47515258	-	hsa:8775	N-ethylmaleimide-sensitive factor attachment protein, alpha	0.660838	0.0247188	1131	1256	1722	2258
APOL2	protein-coding	chr22:36226209-36239533	-	hsa:23780	apolipoprotein L, 2	0.933639	0.00757924	137	200	311	358
FKBP5	protein-coding	chr6:35573585-35688915	-	hsa:2289	FK506 binding protein 5	-0.645555	0.0412298	928	1085	859	512
AXL	protein-coding	chr19:41226755-41261767	+	hsa:558	AXL receptor tyrosine kinase	1.61163	5.90694e-08	1198	1320	3393	4718
NAV3	protein-coding	chr12:77827288-78213010	+	hsa:89795	neuron navigator 3	-1.48988	2.63637e-06	548	595	219	213
NEAT1	ncRNA	chr11:65422798-65426532	+	hsa:283131	nuclear paraspeckle assembly transcript 1 (non-protein coding)	-0.753414	0.0353151	4177	6354	4667	1916
APOA2	protein-coding	chr1:161222293-161223628	-	hsa:336	apolipoprotein A-II	-5.09086	0.0455972	5	7	0	0
RND3	protein-coding	chr2:150468195-150487695	-	hsa:390	Rho family GTPase 3	0.941659	0.0199214	199	184	544	254
RND2	protein-coding	chr17:43025241-43032041	+	hsa:8153	Rho family GTPase 2	1.53942	0.00040252	45	67	169	170
BAD	protein-coding	chr11:64269828-64284704	-	hsa:572	BCL2-associated agonist of cell death	0.873661	0.006846	726	1042	1286	2063
EHD2	protein-coding	chr19:47713344-47743134	+	hsa:30846	EH-domain containing 2	1.4901	3.00844e-07	1640	2106	4576	6405
C10orf54	protein-coding	chr10:71747556-71773580	-	hsa:64115	chromosome 10 open reading frame 54	1.60997	5.28718e-07	660	680	1714	2609
EHD1	protein-coding	chr11:64852727-64878768	-	hsa:10938	EH-domain containing 1	1.3686	2.01964e-06	1275	1402	3190	4107
C10orf35	protein-coding	chr10:69630521-69633599	+	hsa:219738	chromosome 10 open reading frame 35	0.90805	0.00811404	142	242	389	356
SNORD96A	snoRNA	chr5:181241818-181241889	-	hsa:619571	small nucleolar RNA, C/D box 96A	-0.851139	0.0337978	161	188	114	91
SUSD2	protein-coding	chr22:24181476-24189106	+	hsa:56241	sushi domain containing 2	4.75086	1.73445e-51	111	130	2820	3984
NBAS	protein-coding	chr2:15166908-15561348	-	hsa:51594	neuroblastoma amplified sequence	-0.776295	0.00978975	656	989	575	428
SUSD1	protein-coding	chr9:112040783-112175520	-	hsa:64420	sushi domain containing 1	1.27625	8.51397e-05	166	250	589	463
SUSD3	protein-coding	chr9:93058688-93085138	+	hsa:203328	sushi domain containing 3	-0.904598	0.0267771	158	183	89	103
LOC105375752	lncRNA	chr8:127140058-127169518	-		uncharacterized LOC105375752	-4.16288	0.00111876	22	29	2	1
RNR1	rRNA	chrmt:648-1601	+	hsa:4549	s-rRNA	0.835322	0.00651269	441	805	1302	992
LOC105375700	lncRNA	chr8:106655835-106657750	-		uncharacterized LOC105375700	-5.09086	0.0455972	5	7	0	0
BLM	protein-coding	chr15:90717340-90777945	+	hsa:641	Bloom syndrome, RecQ helicase-like	-0.888273	0.0274826	352	420	314	132
TBC1D22A	protein-coding	chr22:46773927-47175699	+	hsa:25771	TBC1 domain family, member 22A	0.767484	0.0179854	316	341	522	660
NBL1	protein-coding	chr1:19647610-19658456	+	hsa:4681	neuroblastoma 1, DAN family BMP antagonist	0.589324	0.0402733	2392	2969	3576	4864
CRABP2	protein-coding	chr1:156699606-156705816	-	hsa:1382	cellular retinoic acid binding protein 2	1.23434	5.678e-06	3657	4459	8976	11062
CSRNP3	protein-coding	chr2:165469647-165689407	+	hsa:80034	cysteine-serine-rich nuclear protein 3	-5.98545	0.0051113	14	7	0	0
BSG	protein-coding	chr19:572454-583493	+	hsa:682	basigin (Ok blood group)	0.67033	0.0214183	15677	16888	22839	31875
BSN	protein-coding	chr3:49554489-49671549	+	hsa:8927	bassoon presynaptic cytomatrix protein	-1.11073	0.0493665	63	76	37	31
BTD	protein-coding	chr3:15601741-15653709	+	hsa:686	biotinidase	0.977826	0.00369749	158	192	364	362
TGOLN2	protein-coding	chr2:85318018-85328296	-	hsa:10618	trans-golgi network protein 2	0.680398	0.00927176	1931	2849	4201	3783
TMEM19	protein-coding	chr12:71686098-71704060	+	hsa:55266	transmembrane protein 19	1.17483	0.000332001	229	328	802	519
TMEM37	protein-coding	chr2:119429912-119438507	+	hsa:140738	transmembrane protein 37	1.0999	0.00851131	73	94	162	212
LEMD1	protein-coding	chr1:205381378-205422086	-	hsa:93273	LEM domain containing 1	-1.0497	0.0316487	87	140	47	66
TMEM69	protein-coding	chr1:45688175-45694436	+	hsa:51249	transmembrane protein 69	-0.719972	0.0168867	619	672	437	396
CA8	protein-coding	chr8:60185420-60281423	-	hsa:767	carbonic anhydrase VIII	1.68967	0.00323721	15	62	130	117
TMEM92	protein-coding	chr17:50271406-50281485	+	hsa:162461	transmembrane protein 92	1.00698	0.00491001	148	287	395	497
CAD	protein-coding	chr2:27217390-27243792	+	hsa:790	carbamoyl-phosphate synthetase 2, aspartate transcarbamylase, and dihydroorotase	-1.46898	7.80819e-08	3871	4331	1459	1672
BCAR3	protein-coding	chr1:93561789-93846627	-	hsa:8412	breast cancer anti-estrogen resistance 3	0.68183	0.0123469	753	938	1456	1399
TMEM98	protein-coding	chr17:32927910-32941649	+	hsa:26022	transmembrane protein 98	1.07109	0.000208978	755	901	1623	2032
CD9	protein-coding	chr12:6199844-6238266	+	hsa:928	CD9 molecule	0.855757	0.00163016	3597	5275	7557	9097
CDA	protein-coding	chr1:20588951-20618908	+	hsa:978	cytidine deaminase	1.22356	0.000118074	321	406	747	1027
HIST2H2AA3	protein-coding	chr1:149842218-149842751	-	hsa:8337	histone cluster 2, H2aa3	0.715807	0.0301755	299	355	476	651
HIST2H2AA4	protein-coding	chr1:149851061-149851594	+	hsa:723790	histone cluster 2, H2aa4	0.732245	0.0448359	273	274	370	591
NCAN	protein-coding	chr19:19211973-19252252	+	hsa:1463	neurocan	4.56183	0.0291217	1	0	2	23
NEDD9	protein-coding	chr6:11183298-11382348	-	hsa:4739	neural precursor cell expressed, developmentally down-regulated 9	5.69382	0.000892249	1	0	22	33
ALDOC	protein-coding	chr17:28573115-28576933	-	hsa:230	aldolase C, fructose-bisphosphate	-0.630839	0.027856	1883	1804	1265	1282
CLU	protein-coding	chr8:27596917-27611437	-	hsa:1191	clusterin	0.986022	0.000218027	5558	6708	11707	13825
TP53I13	protein-coding	chr17:29568721-29573157	+	hsa:90313	tumor protein p53 inducible protein 13	0.693017	0.034047	403	507	620	916
CPM	protein-coding	chr12:68842200-68933171	-	hsa:1368	carboxypeptidase M	-0.893805	0.0271555	167	285	158	95
CR2	protein-coding	chr1:207454300-207489895	+	hsa:1380	complement component (3d/Epstein Barr virus) receptor 2	-7.37664	2.21784e-06	78	78	0	1
ALDH2	protein-coding	chr12:111766887-111809985	+	hsa:217	aldehyde dehydrogenase 2 family (mitochondrial)	0.81043	0.00981596	224	307	492	482
RNU5F-1	snRNA	chr1:44721786-44721901	-	hsa:26828	RNA, U5F small nuclear 1	1.03096	0.00412218	176	238	349	530
CSNK2A1	protein-coding	chr20:482694-543838	-	hsa:1457	casein kinase 2, alpha 1 polypeptide	-0.709829	0.0110767	3959	5768	3704	2529
CSNK2A3	protein-coding	chr11:11351942-11353357	-	hsa:283106	casein kinase 2, alpha 3 polypeptide	-0.597939	0.0450402	611	899	591	452
CTPS2	protein-coding	chrx:16588004-16712917	-	hsa:56474	CTP synthase 2	-0.892211	0.0131567	218	354	177	143
HSPG2	protein-coding	chr1:21822232-21937297	-	hsa:3339	heparan sulfate proteoglycan 2	1.6492	4.28099e-08	724	868	2167	3066
CPEB3	protein-coding	chr10:92046692-92166619	-	hsa:22849	cytoplasmic polyadenylation element binding protein 3	-1.22664	0.0493425	64	55	33	22
CD2BP2	protein-coding	chr16:30350766-30354934	-	hsa:10421	CD2 (cytoplasmic tail) binding protein 2	0.671421	0.0164553	1600	2094	2717	3426
LOC105377329	lncRNA	chr4:89683635-89692454	+		uncharacterized LOC105377329	-1.74001	0.0289832	24	58	15	10
DAP	protein-coding	chr5:10679230-10761275	-	hsa:1611	death-associated protein	0.939674	0.000590973	1536	2227	3446	4050
NEURL4	protein-coding	chr17:7315632-7329319	-	hsa:84461	neuralized E3 ubiquitin protein ligase 4	-0.61141	0.0336915	702	946	551	577
DBP	protein-coding	chr19:48631024-48637018	-	hsa:1628	D site of albumin promoter (albumin D-box) binding protein	-1.32611	6.46296e-05	638	895	254	380
OR51B2	protein-coding	chr11:5323298-5324352	-	hsa:79345	olfactory receptor, family 51, subfamily B, member 2 (gene/pseudogene)	-2.59483	0.000486137	62	73	20	4
OR51B6	protein-coding	chr11:5342514-5505652	-	hsa:390058	olfactory receptor, family 51, subfamily B, member 6	-1.11145	3.78726e-05	1982	2565	1059	1146
PMPCA	protein-coding	chr9:136410573-136423761	+	hsa:23203	peptidase (mitochondrial processing) alpha	-0.647534	0.0195916	2353	2942	1594	1948
DDN	protein-coding	chr12:48995150-48999305	-	hsa:23109	dendrin	-1.04593	0.00322868	241	314	142	140
DES	protein-coding	chr2:219418377-219426739	+	hsa:1674	desmin	1.19951	0.00196781	82	112	217	248
IL1R1	protein-coding	chr2:102153941-102179874	+	hsa:3554	interleukin 1 receptor, type I	1.03113	0.00361096	227	268	693	385
IMPACT	protein-coding	chr18:24426878-24453531	+	hsa:55364	impact RWD domain protein	-0.753411	0.0260789	378	511	341	215
PLCXD2-AS1	lncRNA	chr3:111676266-111677433	-		PLCXD2 antisense RNA 1	-5.31752	0.0279796	6	8	0	0
TATDN3	protein-coding	chr1:212791833-212816639	+	hsa:128387	TatD DNase domain containing 3	-0.954342	0.0122411	214	339	184	114
CLIC1P1	pseudo	chr12:120914392-120915323	+		chloride intracellular channel 1 pseudogene 1	0.582294	0.0443278	873	978	1323	1602
OVOL2	protein-coding	chr20:18024152-18059188	-	hsa:58495	ovo-like zinc finger 2	2.44125	1.73529e-05	19	19	92	126
VPS9D1	protein-coding	chr16:89707133-89721046	-	hsa:9605	VPS9 domain containing 1	1.01613	0.0149376	72	84	167	166
RN7SL3	pseudo	chr14:49853616-49853914	-		RNA, 7SL, cytoplasmic 3	-1.02444	0.000406715	43575	70948	24520	33357
INS-IGF2	protein-coding	chr11:2129112-2161209	-	hsa:723961	INS-IGF2 readthrough	1.88157	3.29505e-08	152	140	554	596
MEIS3	protein-coding	chr19:47403124-47422315	-	hsa:56917	Meis homeobox 3	1.36317	2.65308e-05	279	481	853	1152
HSPD1	protein-coding	chr2:197486584-197499916	-	hsa:3329	heat shock 60kDa protein 1 (chaperonin)	-1.03044	0.011721	399	602	374	143
SERINC2	protein-coding	chr1:31413116-31434680	+	hsa:347735	serine incorporator 2	2.09742	1.76663e-11	1055	1227	3976	6260
HSPB8	protein-coding	chr12:119178790-119194746	+	hsa:26353	heat shock 22kDa protein 8	1.12747	0.00642889	74	100	170	226
SLC30A4	protein-coding	chr15:45502397-45522804	-	hsa:7782	solute carrier family 30 (zinc transporter), member 4	0.961395	0.00916805	145	209	457	268
HSPA2	protein-coding	chr14:64540468-64543237	+	hsa:3306	heat shock 70kDa protein 2	0.895466	0.041135	61	103	137	177
FAM103A1	protein-coding	chr15:82986203-82991057	+	hsa:83640	family with sequence similarity 103, member A1	0.909547	0.00477389	196	242	453	414
COMMD2	protein-coding	chr3:149738470-149752499	-	hsa:51122	COMM domain containing 2	0.726472	0.0182137	437	523	1005	681
EGF	protein-coding	chr4:109912883-109980086	+	hsa:1950	epidermal growth factor	3.60015	3.17948e-05	5	4	83	35
SAMD4A	protein-coding	chr14:54567612-54793315	+	hsa:23034	sterile alpha motif domain containing 4A	2.30011	6.93618e-07	34	33	174	177
EHF	protein-coding	chr11:34624260-34663288	+	hsa:26298	ets homologous factor	-5.05583	1.11409e-35	704	825	35	14
NEBL	protein-coding	chr10:20779973-20958159	-	hsa:10529	nebulette	2.26458	4.72197e-09	216	271	1790	708
SAMD13	protein-coding	chr1:84298775-84350640	+	hsa:148418	sterile alpha motif domain containing 13	-2.79189	5.74347e-10	159	240	32	28
SAMD12	protein-coding	chr8:118324228-118621985	-	hsa:401474	sterile alpha motif domain containing 12	-2.18987	1.60494e-07	290	381	108	48
HIST2H2BB	pseudo	chr1:143904223-143904603	-		histone cluster 2, H2bb (pseudogene)	1.38	0.0360359	22	19	52	62
MIR4435-2HG	lncRNA	chr2:111195866-111495161	-	hsa:541471	MIR4435-1 host gene (non-protein coding)	1.48346	0.000827055	56	98	295	154
MELTF	protein-coding					1.50774	5.38563e-05	109	107	301	352
FBLN1	protein-coding	chr22:45502839-45563362	+	hsa:2192	fibulin 1	0.999807	0.00154196	677	806	1238	1868
FBLN5	protein-coding	chr14:91869411-91947691	-	hsa:10516	fibulin 5	2.43442	5.00008e-11	52	85	374	393
NEO1	protein-coding	chr15:73052484-73305206	+	hsa:4756	neogenin 1	-1.61316	1.35143e-05	242	307	102	87
FOSL2	protein-coding	chr2:28392912-28414649	+	hsa:2355	FOS-like antigen 2	0.886117	0.00101122	971	1371	2198	2314
RRAS	protein-coding	chr19:49635292-49640143	-	hsa:6237	related RAS viral (r-ras) oncogene homolog	0.675288	0.027107	1549	1916	2303	3478
FOSL1	protein-coding	chr11:65892136-65900526	-	hsa:8061	FOS-like antigen 1	1.17927	3.83322e-05	1622	2142	3787	5098
YPEL1	protein-coding	chr22:21697536-21735834	-	hsa:29799	yippee-like 1 (Drosophila)	-0.918825	0.0435872	127	123	67	74
LOC105377101	lncRNA	chr3:57149882-57154055	-		uncharacterized LOC105377101	2.91997	0.00070648	3	9	55	38
ELF4	protein-coding	chrx:130064920-130110500	-	hsa:2000	E74-like factor 4 (ets domain transcription factor)	0.58605	0.0421485	1396	1772	2135	2836
MUM1L1	protein-coding	chrx:106168305-106208956	+	hsa:139221	melanoma associated antigen (mutated) 1-like 1	-3.12708	0.000149523	62	76	16	1
FN1	protein-coding	chr2:215360862-215436167	-	hsa:2335	fibronectin 1	2.05001	1.89649e-12	329	338	1540	1404
ELP2	protein-coding	chr18:36129899-36177931	+	hsa:55250	elongator acetyltransferase complex subunit 2	-0.820755	0.00320596	1069	1519	838	695
FOS	protein-coding	chr14:75278778-75282234	+	hsa:2353	FBJ murine osteosarcoma viral oncogene homolog	-1.80641	1.51606e-11	6406	9082	2659	1983
NFIB	protein-coding	chr9:14081843-14314046	-	hsa:4781	nuclear factor I/B	-5.82464	2.3615e-08	76	83	3	0
NFIA	protein-coding	chr1:61082247-61462788	+	hsa:4774	nuclear factor I/A	-1.99259	0.000426192	68	113	23	24
FUK	protein-coding	chr16:70454727-70480274	+	hsa:197258	fucokinase	-0.787158	0.0315599	194	266	144	135
PPP2R5B	protein-coding	chr11:64917553-64934478	+	hsa:5526	protein phosphatase 2, regulatory subunit B', beta	0.838594	0.018732	286	245	435	582
PLPPR4	protein-coding					-6.42588	0.00112097	10	21	0	0
A4GALT	protein-coding	chr22:42692115-42720514	-	hsa:53947	alpha 1,4-galactosyltransferase	2.15615	6.94418e-14	520	537	2335	2667
LOC105377015	lncRNA	chr3:30603886-30606494	-		uncharacterized LOC105377015	-5.88535	0.00636968	8	13	0	0
EMC7	protein-coding	chr15:34084022-34101852	-	hsa:56851	ER membrane protein complex subunit 7	0.710855	0.0147651	606	731	1045	1254
NFYA	protein-coding	chr6:41072968-41102407	+	hsa:4800	nuclear transcription factor Y, alpha	-0.590853	0.0347315	917	1166	791	666
LOC105377016	lncRNA	chr3:30652459-30663487	+		uncharacterized LOC105377016	-1.34274	0.0283759	74	74	45	18
GEM	protein-coding	chr8:94249249-94262345	-	hsa:2669	GTP binding protein overexpressed in skeletal muscle	0.883686	0.0174658	141	167	370	234
GFY	protein-coding	chr19:49425399-49429064	+	hsa:100507003	golgi-associated, olfactory signaling regulator	1.43192	0.0183602	20	64	69	155
EML1	protein-coding	chr14:99737699-99941538	+	hsa:2009	echinoderm microtubule associated protein like 1	-1.47416	0.000427619	150	225	81	60
EML4	protein-coding	chr2:42169338-42332548	+	hsa:27436	echinoderm microtubule associated protein like 4	-0.902571	0.0219319	383	482	345	148
C14orf93	protein-coding	chr14:22986903-23005130	-	hsa:60686	chromosome 14 open reading frame 93	-0.685753	0.0439845	325	524	238	306
FAM227A	protein-coding	chr22:38578120-38656629	-	hsa:646851	family with sequence similarity 227, member A	-1.05798	0.0440935	77	92	50	36
GLA	protein-coding	chrx:101397791-101408013	-	hsa:2717	galactosidase, alpha	0.633221	0.0314992	540	646	886	1048
NGEF	protein-coding	chr2:232878686-233012938	-	hsa:25791	neuronal guanine nucleotide exchange factor	0.771099	0.0240194	190	207	340	377
CCDC71L	protein-coding	chr7:106656765-106661188	-	hsa:168455	coiled-coil domain containing 71-like	-0.675993	0.0432036	275	403	239	204
CCDC74A	protein-coding	chr2:131527747-131533666	+	hsa:90557	coiled-coil domain containing 74A	0.965626	0.0312859	65	77	124	167
EMP3	protein-coding	chr19:48325372-48330553	+	hsa:2014	epithelial membrane protein 3	1.10194	0.000224366	981	1125	1996	2757
NGFR	protein-coding	chr17:49495293-49515020	+	hsa:4804	nerve growth factor receptor	1.79899	1.43773e-06	113	135	355	548
AACS	protein-coding	chr12:125065431-125143327	+	hsa:65985	acetoacetyl-CoA synthetase	0.68807	0.0254519	331	361	588	594
GSR	protein-coding	chr8:30678061-30727969	-	hsa:2936	glutathione reductase	-0.948775	0.000301852	5072	7876	3697	3273
SMARCA4	protein-coding	chr19:10961001-11062277	+	hsa:6597	SWI/SNF related, matrix associated, actin dependent regulator of chromatin, subfamily a, member 4	-0.620279	0.0286277	935	1053	713	658
AAK1	protein-coding	chr2:69457995-69643845	-	hsa:22848	AP2 associated kinase 1	0.865921	0.00498421	722	1040	2112	1264
FAM222A	protein-coding	chr12:109742112-109770509	+	hsa:84915	family with sequence similarity 222, member A	1.50553	0.000316325	88	119	216	393
ACOT7	protein-coding	chr1:6264272-6385823	-	hsa:11332	acyl-CoA thioesterase 7	0.75587	0.00766047	5868	6918	9661	13012
STK17A	protein-coding	chr7:43583641-43626048	+	hsa:9263	serine/threonine kinase 17a	0.898061	0.00327056	372	579	1080	769
MRPS30	protein-coding	chr5:44808925-44815514	+	hsa:10884	mitochondrial ribosomal protein S30	-0.784783	0.00371139	1358	1892	1047	927
MRPS27	protein-coding	chr5:72219409-72320257	-	hsa:23107	mitochondrial ribosomal protein S27	-0.601357	0.0217773	5557	6453	4038	4317
BLCAP	protein-coding	chr20:37517417-37527931	-	hsa:10904	bladder cancer associated protein	0.627696	0.0333958	676	758	1054	1284
HK2	protein-coding	chr2:74834175-74893354	+	hsa:3099	hexokinase 2	-1.62849	2.53888e-08	1517	1767	666	463
STEAP3	protein-coding	chr2:119223865-119265652	+	hsa:55240	STEAP family member 3, metalloreductase	-1.01773	0.00451173	352	620	199	292
HN1	protein-coding	chr17:75135243-75154683	-	hsa:51155	hematological and neurological expressed 1	0.712409	0.0122357	7227	8878	11644	15983
STEAP1	protein-coding	chr7:90154375-90164827	+	hsa:26872	six transmembrane epithelial antigen of the prostate 1	-1.06187	0.00341974	213	327	141	128
LOC105377727	lncRNA	chr5:172479051-172535787	+		uncharacterized LOC105377727	-5.763	0.00966619	12	6	0	0
NT5DC4	protein-coding	chr2:112721489-112742879	+	hsa:284958	5'-nucleotidase domain containing 4	3.26932	0.00211026	3	3	27	34
CDKN2D	protein-coding	chr19:10566462-10568979	-	hsa:1032	cyclin-dependent kinase inhibitor 2D (p19, inhibits CDK4)	1.18042	0.000490114	165	217	401	503
CDKN2C	protein-coding	chr1:50969970-50974637	+	hsa:1031	cyclin-dependent kinase inhibitor 2C (p18, inhibits CDK4)	1.18236	7.94121e-05	324	489	891	1022
CDKN2B	protein-coding	chr9:22002903-22009313	-	hsa:1030	cyclin-dependent kinase inhibitor 2B (p15, inhibits CDK4)	0.963962	0.0411431	47	68	134	101
FAM212B	protein-coding	chr1:111722064-111739263	-	hsa:55924	family with sequence similarity 212, member B	0.869584	0.0276588	81	128	196	200
CCAT1	ncRNA	chr8:127207382-127219268	-	hsa:100507056	colon cancer associated transcript 1 (non-protein coding)	-3.49333	3.97363e-08	107	113	16	5
HPX	protein-coding	chr11:6431038-6441024	-	hsa:3263	hemopexin	-5.744	0.00986243	11	7	0	0
CDKN1A	protein-coding	chr6:36676460-36687339	+	hsa:1026	cyclin-dependent kinase inhibitor 1A (p21, Cip1)	0.837084	0.00336247	5374	7178	9797	13547
FAM219A	protein-coding	chr9:34398184-34458610	-	hsa:203259	family with sequence similarity 219, member A	0.771954	0.01094	455	521	790	966
HRC	protein-coding	chr19:49152310-49155443	-	hsa:3270	histidine rich calcium binding protein	-5.34282	0.0264287	7	7	0	0
PRAF2	protein-coding	chrx:49071156-49074045	-	hsa:11230	PRA1 domain family, member 2	1.08409	0.00372013	220	306	407	746
MBOAT2	protein-coding	chr2:8860745-9003710	-	hsa:129642	membrane bound O-acyltransferase domain containing 2	0.806914	0.0261434	344	493	1053	493
MBOAT1	protein-coding	chr6:20099684-20212464	-	hsa:154141	membrane bound O-acyltransferase domain containing 1	-0.785465	0.00981316	508	643	341	360
SMAD7	protein-coding	chr18:48919853-48949333	-	hsa:4092	SMAD family member 7	3.19796	7.53974e-14	23	34	294	253
SMAD6	protein-coding	chr15:66704088-66781993	+	hsa:4091	SMAD family member 6	2.2832	1.79097e-10	82	83	459	397
HYI	protein-coding	chr1:43451003-43453989	-	hsa:81888	hydroxypyruvate isomerase (putative)	2.12757	4.51384e-08	73	82	295	417
ETHE1	protein-coding	chr19:43506719-43527193	-	hsa:23474	ethylmalonic encephalopathy 1	0.77149	0.0117936	868	1048	1401	2024
ID2	protein-coding	chr2:8681983-8684453	+	hsa:3398	inhibitor of DNA binding 2, dominant negative helix-loop-helix protein	-0.964673	0.00095994	675	966	475	404
ZDHHC6	protein-coding	chr10:112424411-112446947	-	hsa:64429	zinc finger, DHHC-type containing 6	-0.678733	0.0224103	834	1393	820	623
LOC646383	miscRNA	chr11:130315003-130327035	+		uncharacterized LOC646383	-5.30211	0.0305682	9	4	0	0
EXTL3	protein-coding	chr8:28701473-28753690	+	hsa:2137	exostosin-like glycosyltransferase 3	-0.620205	0.0224178	4196	5313	2929	3549
METTL7B	protein-coding	chr12:55681546-55684611	+	hsa:196410	methyltransferase like 7B	0.691043	0.0325296	244	414	513	581
ILK	protein-coding	chr11:6603708-6610874	+	hsa:3611	integrin-linked kinase	0.960475	0.000698189	1019	1164	2027	2451
IFI35	protein-coding	chr17:43010731-43014459	+	hsa:3430	interferon-induced protein 35	0.763827	0.0263785	204	310	381	521
LRRC15	protein-coding	chr3:194355247-194369743	-	hsa:131578	leucine rich repeat containing 15	9.3421	1.24276e-09	0	0	117	135
ACHE	protein-coding	chr7:100889994-100895971	-	hsa:43	acetylcholinesterase (Yt blood group)	1.80734	0.00798127	19	13	57	64
SLC35A2	protein-coding	chrx:48903180-48911958	-	hsa:7355	solute carrier family 35 (UDP-galactose transporter), member A2	0.753311	0.0134085	588	770	1009	1378
ABHD14B	protein-coding	chr3:51968510-51974630	-	hsa:84836	abhydrolase domain containing 14B	-1.27179	1.47919e-05	1002	1316	453	550
ACLY	protein-coding	chr17:41866916-41930542	-	hsa:47	ATP citrate lyase	-0.594123	0.0209233	13771	15553	10346	10223
BCL7C	protein-coding	chr16:30887795-30894543	-	hsa:9274	B-cell CLL/lymphoma 7C	1.33863	0.00129421	97	74	240	228
SULT1A1	protein-coding	chr16:28605592-28610053	-	hsa:6817	sulfotransferase family, cytosolic, 1A, phenol-preferring, member 1	0.686262	0.0473291	206	303	356	492
RNU5D-1	snRNA	chr1:44731069-44731168	-	hsa:26830	RNA, U5D small nuclear 1	1.03396	0.0359965	45	68	94	145
ACP7	protein-coding					1.43602	0.000987938	54	73	154	204
ACP2	protein-coding	chr11:47239302-47248847	-	hsa:53	acid phosphatase 2, lysosomal	1.0519	0.000496516	381	549	894	1108
BCL9L	protein-coding	chr11:118897758-118925677	-	hsa:283149	B-cell CLL/lymphoma 9-like	0.850578	0.00166841	2232	2743	4313	5103
DDX60L	protein-coding	chr4:168356735-168480298	-	hsa:91351	DEAD (Asp-Glu-Ala-Asp) box polypeptide 60-like	-1.27704	0.00298186	428	507	309	105
B3GALT5	protein-coding	chr21:39657320-39662889	+	hsa:10317	UDP-Gal:betaGlcNAc beta 1,3-galactosyltransferase, polypeptide 5	3.24535	1.13716e-06	11	7	108	77
MRVI1	protein-coding	chr11:10573091-10693988	-	hsa:10335	murine retrovirus integration site 1 homolog	-1.53638	0.000140647	207	220	89	68
ACY3	protein-coding	chr11:67642551-67650829	-	hsa:91703	aspartoacylase (aminocyclase) 3	2.94538	0.00938939	4	2	22	28
EPN1	protein-coding	chr19:55675206-55695767	+	hsa:29924	epsin 1	0.788418	0.0106012	2087	2536	3257	5090
SLC35A5	protein-coding	chr3:112562010-112584439	+	hsa:55032	solute carrier family 35, member A5	0.761518	0.0141797	409	560	1046	684
CCDC88C	protein-coding	chr14:91271323-91417546	-	hsa:440193	coiled-coil domain containing 88C	-0.805322	0.0174568	327	392	252	184
CCDC88A	protein-coding	chr2:55293026-55419624	-	hsa:55704	coiled-coil domain containing 88A	1.22462	0.0213813	122	168	602	123
JMY	protein-coding	chr5:79236102-79327215	+	hsa:133746	junction mediating and regulatory protein, p53 cofactor	-1.30784	0.0386133	42	106	41	20
WDCP	protein-coding	chr2:24032873-24047421	-	hsa:80304	chromosome 2 open reading frame 44	-0.739495	0.0233779	472	559	394	262
SLC35F2	protein-coding	chr11:107790991-107859188	-	hsa:54733	solute carrier family 35, member F2	-0.624573	0.030832	1611	2318	1602	1072
SLC35F6	protein-coding	chr2:26764274-26781231	+	hsa:54978	solute carrier family 35, member F6	0.819242	0.0043577	1669	2127	2985	4013
EPRS	protein-coding	chr1:219968600-220046658	-	hsa:2058	glutamyl-prolyl-tRNA synthetase	-1.15506	0.00498199	1866	2118	1473	456
PRKAG2	protein-coding	chr7:151556124-151633110	-	hsa:51422	protein kinase, AMP-activated, gamma 2 non-catalytic subunit	0.772866	0.0138814	474	788	1364	880
PIK3AP1	protein-coding	chr10:96593312-96720514	-	hsa:118788	phosphoinositide-3-kinase adaptor protein 1	1.10798	0.00492217	93	190	382	246
ADM2	protein-coding	chr22:50481724-50486437	+	hsa:79924	adrenomedullin 2	1.21275	0.0121475	56	70	107	197
SLC36A1	protein-coding	chr5:151447596-151556318	+	hsa:206358	solute carrier family 36 (proton/amino acid symporter), member 1	1.18251	0.000767146	123	145	326	316
TRN-GTT7-1	tRNA	chr1:148529257-148529330	+		transfer RNA-Asn (GTT) 7-1	1.2648	0.0367463	18	41	64	80
RNU5E-1	snRNA	chr1:11908154-11908272	+	hsa:26829	RNA, U5E small nuclear 1	1.11233	0.00114958	142	191	352	400
PRKAB1	protein-coding	chr12:119667956-119681624	+	hsa:5564	protein kinase, AMP-activated, beta 1 non-catalytic subunit	0.743404	0.0166249	533	616	857	1165
ACOX2	protein-coding	chr3:58505136-58537172	-	hsa:8309	acyl-CoA oxidase 2, branched chain	-1.31949	0.0323091	47	79	23	29
WDR3	protein-coding	chr1:117929749-117960426	+	hsa:10885	WD repeat domain 3	-1.20156	3.33946e-05	1183	1518	724	516
WDR1	protein-coding	chr4:10074339-10116949	-	hsa:9948	WD repeat domain 1	0.590146	0.0325545	3368	4006	5180	6485
LMAN2L	protein-coding	chr2:96705929-96740092	-	hsa:81562	lectin, mannose-binding 2-like	1.22533	1.99988e-05	627	843	1603	1981
CRYM-AS1	ncRNA	chr16:21300849-21318591	+	hsa:400508	CRYM antisense RNA 1	-1.87612	0.0100752	33	68	12	16
KDR	protein-coding	chr4:55078259-55125595	-	hsa:3791	kinase insert domain receptor (a type III receptor tyrosine kinase)	-5.18251	0.0465956	1	13	0	0
C5orf30	protein-coding	chr5:103259036-103278660	+	hsa:90355	chromosome 5 open reading frame 30	-1.00793	0.0105901	220	317	182	99
CCDC3	protein-coding	chr10:12896625-13001704	-	hsa:83643	coiled-coil domain containing 3	0.81875	0.00814576	487	554	833	1100
DDRGK1	protein-coding	chr20:3190350-3204697	-	hsa:65992	DDRGK domain containing 1	0.641467	0.0366031	534	683	844	1139
SECTM1	protein-coding	chr17:82321293-82333951	-	hsa:6398	secreted and transmembrane 1	1.63191	1.26209e-05	127	193	386	636
CORO7-PAM16	protein-coding	chr16:4340251-4416961	-	hsa:100529144	CORO7-PAM16 readthrough	-5.48106	0.0228981	2	15	0	0
THOC2	protein-coding	chrx:123600563-123733054	-	hsa:57187	THO complex 2	-1.02517	0.0181484	149	251	135	70
MACC1	protein-coding	chr7:20134655-20217390	-	hsa:346389	metastasis associated in colon cancer 1	-1.81422	0.00432136	98	125	57	11
IFIT3	protein-coding	chr10:89327819-89340968	+	hsa:3437	interferon-induced protein with tetratricopeptide repeats 3	1.61866	0.0420775	12	12	50	29
IFIT1	protein-coding	chr10:89392546-89406487	+	hsa:3434	interferon-induced protein with tetratricopeptide repeats 1	2.1783	0.000108162	21	26	148	78
ACSL5	protein-coding	chr10:112375265-112428380	+	hsa:51703	acyl-CoA synthetase long-chain family member 5	-1.97638	4.2364e-14	3613	4392	1129	1018
SLC37A2	protein-coding	chr11:125063067-125089235	+	hsa:219855	solute carrier family 37 (glucose-6-phosphate transporter), member 2	2.04562	2.32799e-07	51	75	254	287
SLC37A4	protein-coding	chr11:119024351-119029568	-	hsa:2542	solute carrier family 37 (glucose-6-phosphate transporter), member 4	-0.926995	0.0148814	211	335	124	172
CPLX1	protein-coding	chr4:784957-804908	-	hsa:10815	complexin 1	-1.40996	0.0102875	92	109	26	53
LAMA5	protein-coding	chr20:62319449-62367318	-	hsa:3911	laminin, alpha 5	0.774823	0.0104822	510	545	870	1041
LAMB1	protein-coding	chr7:107923799-108003176	-	hsa:3912	laminin, beta 1	1.42752	1.92275e-06	583	742	2309	1464
LCK	protein-coding	chr1:32274113-32286165	+	hsa:3932	LCK proto-oncogene, Src family tyrosine kinase	4.71336	1.26326e-22	18	10	343	446
GOSR2	protein-coding	chr17:46923149-46942020	+	hsa:9570	golgi SNAP receptor complex member 2	0.827341	0.00297268	1163	1421	2187	2626
EREG	protein-coding	chr4:74365143-74388760	+	hsa:2069	epiregulin	-3.49435	2.58403e-20	5358	6319	818	294
PEA15	protein-coding	chr1:160205319-160215376	+	hsa:8682	phosphoprotein enriched in astrocytes 15	0.999406	0.000285626	2570	3109	5307	6611
KAT2B	protein-coding	chr3:20071364-20154402	+	hsa:8850	K(lysine) acetyltransferase 2B	1.03285	0.0497139	48	43	125	76
LSR	protein-coding	chr19:35248681-35267964	+	hsa:51599	lipolysis stimulated lipoprotein receptor	0.81519	0.00701097	1793	2023	2868	4193
LTK	protein-coding	chr15:41503642-41513887	-	hsa:4058	leukocyte receptor tyrosine kinase	1.07622	0.0135602	68	89	141	204
SLC38A2	protein-coding	chr12:46358188-46372825	-	hsa:54407	solute carrier family 38, member 2	-1.85838	3.50343e-08	7779	9527	3498	1595
CTXN1	protein-coding	chr19:7924496-7926166	-	hsa:404217	cortexin 1	-0.864689	0.0176056	445	675	230	403
FOXF1	protein-coding	chr16:86510527-86514464	+	hsa:2294	forkhead box F1	1.04888	0.0424471	40	48	83	108
FOXD1	protein-coding	chr5:73446256-73448527	-	hsa:2297	forkhead box D1	1.01003	0.00162231	201	247	466	483
FOXA3	protein-coding	chr19:45864260-45873797	+	hsa:3171	forkhead box A3	0.769617	0.0238513	202	253	355	457
FOXC1	protein-coding	chr6:1610446-1613897	+	hsa:2296	forkhead box C1	0.828261	0.00364139	586	742	1412	1077
WFS1	protein-coding	chr4:6260368-6303265	+	hsa:7466	Wolfram syndrome 1 (wolframin)	0.872341	0.00278162	880	1021	1604	2057
BAIAP2	protein-coding	chr17:81035147-81110516	+	hsa:10458	BAI1-associated protein 2	0.637036	0.0212347	1330	1524	2178	2504
ESAM	protein-coding	chr11:124753126-124762285	-	hsa:90952	endothelial cell adhesion molecule	1.44107	8.52597e-05	135	191	360	557
BHLHA15	protein-coding	chr7:98212254-98212959	+	hsa:168620	basic helix-loop-helix family, member a15	1.47398	0.0049445	33	35	96	104
MDK	protein-coding	chr11:46381655-46383837	+	hsa:4192	midkine (neurite growth-promoting factor 2)	0.741091	0.00958665	4725	5901	7799	10773
LOC101060400	ncRNA	chr17:48634804-48639366	-	hsa:101060400	ankyrin repeat domain-containing protein 34A-like	0.627685	0.0385622	422	577	719	889
MGA	protein-coding	chr15:41660775-41769937	+	hsa:23269	MGA, MAX dimerization protein	-0.666382	0.0356837	408	469	290	294
MIA	protein-coding	chr19:40775377-40777493	+	hsa:8190	melanoma inhibitory activity	9.00859	6.96547e-09	0	0	93	107
MKX	protein-coding	chr10:27672874-27745849	-	hsa:283078	mohawk homeobox	-2.46181	1.39926e-07	220	175	47	31
POPDC3	protein-coding	chr6:105158280-105163640	-	hsa:64208	popeye domain containing 3	1.38579	0.000641935	112	87	328	237
[truncated: 447 more rows]
