# Supplementary material for: PUMILIO Proteins in Colorectal Cancer: Tumor Growth Promoting Function and Potential as Therapeutic Targets
Source: Research Square preprint supplement (doi:10.21203/rs.3.rs-199046/v1), 2021-02-11
Supplement: Supplementary file 7 [file bf09b2a414705568c42c8c47.xlsx]

## Sheet: Sheet1
Table S4. Upregulated proteins in Pum1-/- HCT116 cells
Gene	WT-1	WT-2	Pum1-/--1	Pum1-/--2
AACS	1.03811	0.942263	1.40531	1.43303
AAK1	0.98232	0.858564	1.26188	1.39448
AASS	0.976	0.868571	1.39886	1.30743
ABAT	1.06231	0.842697	1.11236	1.14811
ABCB6	1.00664	0.905973	1.23341	1.40376
ABCD1	0.91016	1	1.03636	1.63529
ABHD17B	1.2827	0.885312	1.28471	1.29779
ABI1	1.06377	0.973684	1.23178	1.20243
ABLIM1	1.02843	0.911765	1.21569	1.17255
ABLIM3	0.886179	1.13008	1.47358	1.15752
ABR	1.0011	0.92333	1.19606	1.22344
ACAP2	1.00453	0.992072	1.29558	1.48811
ACAP3	0.181707	0.710252	0.710252	0.699816
ACBD7	1.26721	0.967213	2.01148	2.46393
ACOT7	1.00563	0.956081	1.34797	1.19257
ACOT8	0.985986	0.960961	1.1031	1.25626
ACOT9	1.00433	0.954545	1.16234	1.24784
ACP2	1.01521	0.874239	1.27282	1.31643
ACPL2	1.1558	1.06995	1.61049	1.62003
ACSF2	0.945545	0.90396	1.22574	1.24653
ACSL1	1.0608	1.02411	1.23899	1.32704
ACSS2	1.04475	1.13132	1.18774	1.39981
ACTN1	1.02217	0.858374	1.73399	1.36207
ACTN4	1.05182	0.927233	1.43109	1.20507
ACVR1	1.04265	0.983412	1.22275	1.49052
ADAM10	0.945434	0.994432	1.26615	1.49332
ADAM9	1.02686	0.868878	1.38547	1.40758
ADCK4	0.965139	0.962151	1.0498	1.18327
ADD1	0.996622	0.933559	1.48986	1.64977
ADD3	1.11152	1.00735	1.59191	1.95466
ADIPOR1	0.914747	1.04608	1.14055	1.27535
AFF4	1.00427	0.901709	1.04594	1.1688
AFP	0.861781	0.705937	0.945269	1.02319
AGA	0.643586	0.682216	0.801749	0.976676
AGAP1	0.828548	0.819524	1.1009	0.795734
AGFG2	0.795332	0.913824	0.987433	1.22531
AGPAT1	0.901042	1.13229	1.28125	1.19896
AGPAT2	0.785417	1.02917	1.17396	1.34062
AGPAT9	1.13545	0.912839	1.46525	1.6278
AHCYL2	1.00507	1.10345	1.03245	1.43002
AHNAK	1.02244	0.897616	2.07574	1.81907
AHNAK2	1.07885	0.971326	1.33214	1.28793
AHR	0.952941	1.01711	1.40535	1.87273
AHSG	1.25066	0.839681	1.22498	1.23295
AIFM2	0.965922	0.934195	1.41951	1.58049
AIM1	1.06909	0.992727	1.25091	1.56091
AJUBA	0.983069	0.951323	1.08889	1.3164
AKAP2	1.03673	0.852046	1.26338	1.0703
AKR1C3	1.04866	0.922426	1.12341	1.37588
ALAD	1.01816	0.910192	1.13118	1.1998
ALCAM	0.982644	1.00267	1.45661	1.74099
ALDH1A3	0.968677	1.03248	1.85151	2.14501
ALDH2	1.00713	1.01222	1.54073	1.69756
ALDH3B1	0.833472	0.886761	1.12406	1.07244
ALDH4A1	0.984934	1.01507	1.40301	1.54143
ALDH5A1	0.979787	0.991489	1.36702	1.52553
ALG11	0.927368	0.922105	1.23474	1.13789
ALG2	1.04045	0.935955	1.21573	1.2573
ALS2	0.991027	1.02293	1.10169	1.31007
ALS2CL	0.671358	0.655172	0.836031	0.704433
ANKFY1	1.00223	0.908686	1.13252	1.13363
ANKIB1	0.941176	1.01342	1.32301	1.23529
ANKRD11	0.892354	0.857143	1.0664	1.02012
ANKRD13A	0.901235	0.861111	1.07716	1.1358
ANKRD52	1.0431	1.04701	1.19491	1.34084
ANLN	0.973494	0.936145	1.6253	1.65783
ANO1	1.0048	0.757503	1.72749	1.67947
ANO10	0.915686	0.916667	1.09608	1.24804
ANO6	0.944505	0.986942	1.30577	1.44831
ANXA2	1.0054	1.06911	1.44816	1.02268
ANXA3	1.05143	0.962286	1.46057	1.13029
ANXA5	1.03277	0.938983	1.56836	1.16384
ANXA6	1.00123	0.953086	1.79136	1.75432
AP1S1	1.06713	1.05711	1.26353	1.27655
AP1S2	0.955429	1	1.52229	1.57829
AP2A1	0.978495	0.99218	1.13587	1.14076
AP2M1	0.985901	1.01309	1.09366	1.22961
AP4B1	0.907249	1.00959	1.37207	1.20469
APAF1	0.981557	1.0502	1.15164	1.20492
APBB1	0.995383	0.719298	1.04524	0.99169
APLP2	0.919954	0.945476	1.26566	1.25638
APOA2	2.07562	0.956975	2.05346	1.52282
APOBEC3C	0.945848	0.825812	1.36913	0.888989
APOBEC3F	1.14551	1.01238	1.44272	1.49639
APP	0.989189	0.846486	1.23459	1.15568
APPL1	1.02977	0.894157	1.15987	1.09482
ARAP3	0.980473	0.971223	1.11511	1.27235
ARF3	0.911283	0.973963	1.08582	1.15526
ARF4	0.960396	1.07481	1.54895	1.20022
ARFGAP3	1.94406	1.74825	3.74126	2.92075
ARFGEF1	0.990702	0.998967	1.20351	1.34504
ARFGEF2	0.987805	0.974593	1.0498	1.26423
ARHGAP1	1.03303	0.97998	1.16717	1.22523
ARHGAP18	0.979615	0.91393	1.10079	1.11891
ARHGAP21	1.10067	1.00895	1.25056	1.21477
ARHGAP23	1.09392	0.774813	1.03842	1.12273
ARHGAP35	0.991561	0.943038	1.20781	1.25422
ARHGEF10	0.958951	0.937286	1.40365	1.46978
ARHGEF11	1.02197	0.91841	1.21234	1.28138
ARHGEF17	0.815957	0.788298	1.27872	1.27979
ARHGEF40	1.19707	1.13582	2.22237	2.19308
ARL1	0.977987	0.962264	1.19182	1.20755
ARL4C	0.925242	0.491645	1.10818	1.01583
ARL8A	0.899415	1.06316	1.3345	1.53801
ARL8B	0.955796	1.04912	1.03242	1.30452
ARMC8	0.988458	1.02518	1.17733	1.26443
ARNTL	1.16293	1.13238	1.54888	1.0947
ASAH1	0.99477	1.00418	1.35251	1.28766
ASAP2	1.04572	0.969519	1.77374	1.71747
ASB9	1.04947	0.624636	1.18429	1.14064
ASPM	1.03096	0.833716	1.24427	1.14679
ASXL1	0.863348	0.744796	1	0.851584
ATF6	0.911005	0.910048	1.00478	1.18373
ATG3	0.996475	0.942421	1.17391	1.15746
ATL2	0.865521	0.837209	1.05865	1
ATL3	0.946721	0.822404	1.39208	1.29372
ATM	0.984783	0.965217	1.21739	1.05217
ATP11A	0.835443	0.841772	0.958409	1.12929
ATP13A2	1.20247	1.11358	1.79753	1.91235
ATP13A3	0.985154	0.943796	1.0912	1.17497
ATP1B1	0.959666	0.959666	1.41168	1.0765
ATP2B4	0.971647	1.08724	1.16467	1.26063
ATP6V1G1	1.00296	1.05138	1.05435	1.33202
ATP6V1H	1.06099	1.06292	1.15682	1.33204
ATP9A	1.0093	1.08093	1.09209	1.37674
ATRN	0.982514	0.962842	1.1388	1.25464
ATRX	1.06147	1.0966	1.18661	1.31833
AXL	0.944099	0.976398	1.36894	1.40124
AZI2	0.735743	0.6249	0.885141	0.718072
B2M	1.65472	1.19057	1.4	2.44528
B3GALTL	1.00617	1.01728	1.5679	1.65432
B3GNT1	0.976296	0.951111	1.2163	1.23407
B4GALT5	0.872682	0.883807	1.50062	1.39679
B4GALT7	0.980038	0.807034	1.12833	0.945817
BAD	1.00519	1.05504	1.21184	1.18692
BBC3	1.08306	1.07541	1.23169	1.78361
BCAM	1.08344	0.974716	1.93173	2.18584
BCAR3	1.02488	1.03791	1.08649	1.37322
BCL2L1	1.05991	1.01743	1.16231	1.34314
BCL2L12	0.785965	0.650292	1.54035	1.06082
BCL2L2	0.614217	0.716454	0.764377	0.976038
BICD1	1.07178	0.868613	1.44039	1.05961
BLVRA	1.04199	0.98895	1.34365	1.4453
BLVRB	0.971875	0.964583	1.3875	1.30937
BMP2K	0.982888	0.971123	1.15936	1.24278
BNIP2	1.01913	0.843783	1.26355	1.20298
BOD1L1	1.02414	0.933602	1.18913	1.20724
BRMS1L	0.998837	0.738372	1.31163	0.881395
BSG	0.995397	1.00345	1.19217	1.19333
BUB1	1.02795	0.853002	1.14803	1.05797
C10orf118	1.00992	0.970232	1.16648	1.22051
C10orf35	1.01954	1.15527	1.06623	1.47883
C10orf54	1.24462	0.946154	1.47077	1.61077
C10orf88	1.01027	1.05594	1.14269	1.3105
C12orf23	0.907159	0.969799	1.30761	1.39821
C12orf5	0.990556	0.963274	1.20462	1.24659
C12orf57	1.11052	0.723176	1.38305	1.06009
C14orf159	0.985552	0.907121	1.16718	1.20846
C15orf38-AP3S2	1.06268	0.844715	1.35641	1.56034
C15orf52	0.897196	0.990654	2.81464	2.90498
C15orf57	1.08929	0.839286	1.31513	0.918067
C19orf21	0.943497	0.867804	1.24627	1.12687
C19orf33	1.09365	0.429967	1.0855	0.78013
C19orf52	0.86597	0.840304	1.18251	0.81749
C19orf60	0.950719	0.824435	1.13655	0.948665
C1orf116	0.855476	0.978456	1.00628	1.15171
C1orf226	1.00651	1.13395	1.34512	1.51535
C1orf50	1.25638	0.891489	1.4117	1.18404
C20orf24	1.03945	1.13006	1.19936	1.3049
C2CD2	0.795724	0.718131	1.07838	0.713381
C2CD4C	0.922144	0.938322	1.15774	1.31446
C2orf18	0.89781	0.945255	1.08668	1.24909
C3orf37	0.968566	1.01081	1.13949	1.28782
C7orf43	0.943474	1.00206	1.16136	1.40596
C8orf47	1.19902	0.993171	1.29073	1.24585
CA13	1.0276	0.726115	1.3397	1.19108
CA8	1.08854	1.04271	1.44063	1.27604
CACHD1	0.897219	1.03507	1.13301	1.27328
CALB2	1.16038	0.831237	1.71174	1.47484
CALCOCO2	0.993644	1.04767	1.22669	1.32521
CALU	1.19827	0.652221	1.65222	0.928494
CAMK1D	1.04461	0.872407	1.2666	1.361
CANT1	0.966942	0.839876	1.09504	1.17665
CAP1	0.938312	0.982684	1.21753	1.11039
CAP2	0.96283	0.914868	1.494	1.66906
CAPN1	1.01257	1.01466	1.31832	1.44084
CAPN2	1.01427	0.949032	1.09684	1.18247
CAPN7	0.975069	0.99723	1.14958	1.33333
CAPZA1	0.996859	1.02094	1.15707	1.17592
CAPZA2	1.01665	0.933403	1.16129	1.08637
CARKD	0.950495	1.0505	1.21683	1.25941
CASK	1.04276	0.982456	1.14035	1.19079
CASP10	0.936404	1.23575	1.40461	1.8114
CASP3	0.930255	0.94499	1.06876	1.19155
CASP7	1.0528	0.976293	1.3125	1.23168
CAST	1.11988	0.923156	1.49795	1.33914
CBL	1.07992	0.965164	1.22951	1.22234
CBLB	0.856415	0.906542	1.05013	1.33135
CBR3	0.947434	1.04255	1.8398	1.56696
CBX4	0.947191	1.01348	1.04607	1.21011
CBX5	1.13308	1.00868	1.31244	1.35776
CBX6	0.876588	1.08984	1.09891	1.54991
CCDC115	0.950082	0.974632	1.50573	0.941899
CCDC134	1.07116	1.2554	1.38119	1.52478
CCDC82	1.10436	1.05945	1.54029	1.48085
CCDC88A	0.828989	0.857143	1.09176	1.14286
CCDC90B	0.977371	1.01832	1.19181	1.30603
CCNB1	0.961707	1.08972	1.17834	1.39387
CCNB2	0.990815	0.970149	1.1814	1.30884
CCND1	0.907494	0.858314	2.63466	2.37471
CCND3	1.0308	0.812115	1.35113	1.22074
CD109	1.0169	0.926082	1.33685	1.36748
CD151	0.961022	1.08737	1.51478	1.31855
CD276	0.922103	0.774099	1.16845	1.21616
CD44	0.992424	1.23485	1.59545	1.54545
CD46	0.963399	1.09281	1.11634	1.28105
CD58	1.01874	0.90849	1.0419	1.23925
CD63	0.960145	1.07005	1.13043	1.42271
CD82	0.992056	0.954987	1.05914	1.60282
CD97	1.07624	0.946961	1.28398	1.19448
CD99	1.00741	1.01693	1.39048	1.33333
CDA	1.06789	1.08055	1.3061	1.64212
CDC20	0.986737	1.17905	1.09682	1.54377
CDC42	0.953177	1.10479	1.22854	1.26087
CDC42BPA	0.977242	0.8166	1.96519	2.2249
CDC42BPB	1.01822	0.944266	1.209	1.27438
CDC42EP2	0.715116	0.741279	1	0.791667
CDCA2	1.02002	0.953281	1.14794	1.28921
CDCA3	0.982202	0.9099	1.16574	1.19132
CDCA4	1.01687	1.01912	1.08661	1.25759
CDCP1	1.06629	1.05393	1.21798	1.32472
CDH3	0.950226	1.00339	1.56787	1.84729
CDK17	0.962766	0.937234	1.12766	1.13617
CDK5	0.972683	1.00293	1.08098	1.20878
CDK6	0.792958	0.661972	1.0169	0.905634
CDK7	0.938508	1.00403	1.0625	1.19153
CDKN1A	0.942656	0.979879	1.55734	1.74346
CDS2	1.02687	1.06567	1.19701	1.45373
CENPF	1.0286	0.903602	1.43114	1.26483
CENPI	0.982398	1.0165	1.20352	1.23542
CENPT	0.898374	0.742886	1.38211	0.917683
CEP350	1.03811	0.917611	1.18641	1.17096
CEP55	0.960997	0.820152	1.1441	0.966414
CEP57	0.821905	0.873333	1.0619	1.18476
CEP97	1.00744	0.837407	1.36344	1.29437
CERS5	0.936373	0.925769	1.24602	1.35737
CGGBP1	0.964323	0.964323	1.07555	1.33263
CGN	1.05796	0.979761	1.16835	1.20331
CGNL1	0.892818	0.983425	1.44862	1.46077
CHDH	1.0182	0.990899	1.24573	1.76109
CHKA	1.0261	0.979834	1.27165	1.49703
CHMP1A	1.05473	0.723383	1.3194	0.79403
CHMP4C	0.964326	0.851728	1.63099	0.899666
CHP1	1.1781	0.845969	1.66306	1.41396
CHPF	0.945516	0.927355	1.05902	1.17707
CHPF2	0.857003	0.854065	1.00098	0.979432
CHST12	1.05755	1.20738	1.11726	1.66884
CHST14	1.05746	1.17848	1.33374	1.39242
CIT	1.05281	0.937079	1.37978	1.41685
CKAP2L	0.910314	1.15807	1.32287	1.42601
CKAP5	1.01756	1.00878	1.11526	1.22064
CKS1B	1.02446	1.37266	1.20432	1.77842
CLASP1	0.907331	1.0083	1.14661	1.57815
CLASP2	0.971116	1.01793	1.0996	1.20618
CLIC1	0.990342	0.846356	1.38543	0.727831
CLIC3	1.11973	0.808163	2.3551	2.0585
CLIC4	1.06047	0.821534	1.60177	1.68879
CLMN	0.938433	0.882463	1.0597	1.06996
CLN5	0.947537	0.943255	1.1531	1.16167
CLTA	1.09981	0.798479	1.35361	0.895437
CLTC	1.01149	1.00313	1.13689	1.186
CLU	1.03406	0.793187	1.43796	1.15085
CMTM7	0.924116	0.944906	1.10707	1.23389
CNIH4	0.715166	1.18496	1.53514	1.38101
CNKSR1	0.956183	0.812074	1.16456	1.01071
CNN2	0.954217	0.879518	1.39639	1.20241
CNN3	1.05669	0.951749	1.39928	1.28589
CNNM3	0.945399	0.943377	1.06269	1.11628
CNP	0.9818	1.02123	1.11223	1.28817
COA5	0.900724	1.04137	1.11686	1.72906
COG1	0.980021	0.956887	1.1388	1.17981
COG2	0.988821	0.904472	1.10772	1.12703
COG3	0.926295	0.894422	1.12151	1.09562
COL13A1	1.00683	1.14505	1.77304	1.60922
COL6A2	0.93076	0.944381	1.16572	1.05108
COQ7	0.895749	0.992915	1.15283	1.06883
CORO1B	0.973054	0.914172	1.2485	1.26148
CORO1C	0.972254	1.03699	1.37572	1.36879
CORO2A	0.960177	0.92146	1.20796	1.52544
COX7A2L	0.901623	0.996957	1.0142	1.22515
CPD	1.02814	0.983766	1.13312	1.19264
CPEB4	0.930138	0.992689	1.11617	1.44517
CPNE2	1.02299	1.06092	1.51264	1.38161
CPPED1	1.07134	1.01209	1.52721	1.63966
CPS1	1.00377	1.01887	1.11509	1.22358
CPT1A	0.99884	0.964037	1.32251	1.31787
CRABP2	0.98951	1.06876	1.3345	1.40443
CRAT	1.01963	1.04058	1.54843	1.85079
CRELD1	1.16397	1.05774	1.41224	1.46651
CRELD2	1.09479	0.963542	1.31146	1.06146
CRIM1	0.942029	0.881159	1.47971	1.77391
CRIP1	0.98494	1.32831	1.74849	2.95934
CRIP2	1.03846	1.01857	1.57029	1.99469
CRK	1.19372	0.888528	1.32576	1.14719
CRLF1	1.01278	0.821042	1.22517	1.19862
CRTAP	0.988764	0.961298	1.32709	1.32834
CRYM	1.11837	1.08469	1.43163	1.25816
CSPG4	1.05022	0.78821	1.16594	1.12336
CSPP1	0.978831	0.945565	1.07762	1.22379
CSRP1	1.00232	1.24739	1.2892	1.91405
CSRP2	1.03045	1.30694	1.11084	1.71255
CTDSPL	0.810395	0.575403	0.870425	1.04832
CTNNAL1	1.02694	0.868534	1.26185	1.19181
CTNND1	1.00844	1.17261	1.02908	1.77486
CTSB	1.13689	0.923434	1.19258	1.19026
CTSD	0.996587	0.986348	1.51081	0.977247
CTSL2	1.01919	0.954853	1.03386	1.39391
CTSZ	1.04684	1.00585	1.35831	1.32319
CTTNBP2NL	0.947519	0.850191	1.125	1.08397
CUEDC1	0.888335	0.722832	1.1326	1.34098
CUL4B	0.982234	0.904822	1.51523	1.62437
CUL7	0.896175	0.856831	1.13989	1.05902
CUL9	0.939638	0.62173	1.15895	0.944668
CXADR	0.941234	0.918707	1.3761	1.63663
CYB5R1	0.919916	0.855638	1.27292	1.40991
CYB5R3	1.01767	1.01649	1.3086	1.42285
CYBA	0.909597	0.920723	1.14604	1.26008
CYFIP1	0.977912	0.970884	1.10241	1.15863
CYP2S1	0.921406	0.921406	1.30714	1.46743
CYP4F22	0.800456	1.08438	1.05131	1.33067
CYSTM1	0.929922	1.12013	1.28031	1.17909
CYTH1	0.961366	0.919137	1.13387	1.20755
DAAM1	0.849376	0.92959	1.21123	1.24688
DAB2IP	1.02599	0.883616	1.37514	1.25989
DAG1	1.11902	0.931436	1.38422	1.63648
DAP	0.594313	0.91564	0.886256	1.12986
DBI	1.13313	1.06808	1.38124	2.07716
DBNL	1.5994	1.47085	2.52616	1.61584
DCBLD2	0.91062	0.939012	1.41115	1.59411
DCK	0.976122	0.978988	1.15568	1.12703
DCLK2	0.967811	1.02575	1.28755	1.34227
DCP2	0.932764	1.02988	1.11099	1.33084
DCUN1D3	1.01811	1.06407	1.91504	1.99164
DDX17	0.949891	1.02288	1.07734	1.26144
DDX46	0.449356	0.599328	0.884723	0.546167
DDX58	0.96999	1.05518	1.27977	1.69894
DEDD	1.09519	0.90372	1.33917	0.977024
DENND4C	0.998922	0.934267	1.35453	1.43211
DENND5B	1.25771	1.20099	2.03946	1.27867
DESI2	1.199	1.0908	0.997512	1.69154
DFNA5	0.989955	0.986607	1.3471	1.46205
DGKA	0.983068	1.03088	1.28685	1.3745
DGKQ	0.860225	0.841463	1.01876	1.14916
DHRS2	0.977754	0.746822	0.995763	0.997881
DHTKD1	1.11089	0.934249	1.16879	1.26398
DIAPH3	0.960215	0.97957	1.33656	1.5871
DKK1	0.916509	1.00949	1.34535	1.6926
DLGAP5	1.00892	1.05017	1.19844	1.31773
DMTN	1.09989	0.902411	1.6085	1.41102
DMXL1	0.990496	0.983105	1.26927	1.40127
DMXL2	0.901354	0.895551	0.935203	1.1528
DNAJA4	0.997778	0.975556	1.19889	1.20778
DNAJB12	0.968815	0.93659	1.07692	1.12786
DNAJB14	0.951357	1.02262	1.39593	1.55769
DNAJB4	1.01351	1.03378	1.22185	1.38401
DNAJB5	0.692661	0.833716	1.28096	1.06766
DNAJB6	0.98521	1.01934	1.1058	1.22981
DNAJC1	0.953362	0.885033	1.2115	1.12148
DNAJC13	1.01046	0.965481	1.16318	1.24686
DNAJC25-GNG10	1.04399	1.06974	1.05472	1.48069
DNAJC3	1.00575	0.958621	1.21379	1.25747
DNAJC5	1.02425	1.01732	1.31178	1.46074
DNASE2	1.01074	1.05489	1.11575	1.43079
DNM2	0.97137	0.9591	1.10327	1.15337
DOCK5	1.00401	0.922563	1.97463	1.93992
DPP8	1.11332	1.03388	1.31192	1.36215
DPYSL2	1.02749	0.955497	1.90052	2.09948
DPYSL4	0.98191	1.00503	1.27437	1.13367
DPYSL5	0.991297	1.08877	1.10009	1.44125
DSG2	1.03988	0.985685	1.23006	1.33129
DST	0.978814	0.831568	1.15254	1.00847
DTL	0.936789	1.12137	1.11631	1.35019
DTX2	1.13587	1.1644	1.21196	1.47418
DTX3L	0.978118	0.977024	1.58206	2.00109
DUSP6	1.21099	0.717582	1.27143	1.23956
DVL2	0.992231	0.973363	1.11543	1.14872
DYNC1H1	0.980352	0.980352	1.20889	1.22854
DYNC1LI2	0.986193	0.959566	1.27416	1.29684
DYNLRB1	1.10514	1.03086	1.22971	1.25486
ECE1	0.981842	0.950713	1.77691	1.86252
ECT2	0.977912	0.972892	1.11747	1.20783
EEF1A1	0.905109	0.963504	1.06326	1.23966
EEF1A2	0.978402	0.979482	1.09719	1.2851
EFCAB14	1.00352	0.855761	1.24626	1.12313
EHBP1L1	1.01143	0.898129	1.18399	1.1237
EHD2	0.971698	0.876179	1.28538	1.31132
EHD4	0.997775	0.936596	1.16018	1.1079
EHHADH	1.00707	1.00404	1.22424	1.41515
EIF2AK3	0.955208	0.898958	1.12187	1.13854
EIF4A2	1.00691	0.899309	1.15893	1.23692
EIF4EBP2	0.863195	0.760812	1.25684	0.72639
EIF4ENIF1	1.02969	0.980912	1.1527	1.24178
EIF5A2	1.40324	0.882966	1.71263	1.22016
ENO2	1.0767	0.822026	1.22419	0.988201
ENPP1	1.02772	0.935318	1.4271	1.23819
ENPP4	0.974039	0.815161	1.15992	1.05192
EOGT	0.868721	0.924658	1.16438	1.24201
EPDR1	1.06122	1.01921	1.20408	1.30492
EPHA2	1.00415	0.962656	1.53665	1.76072
EPHB2	1.02265	0.94564	1.3624	1.25821
EPHB4	1.00483	1.04222	1.18094	1.41496
EPHX1	0.967975	0.989669	1.31405	1.46901
EPM2AIP1	0.86428	0.920899	0.979184	1.1607
EPPK1	1.00358	0.86828	1.20072	1.29749
EPS8	1.00451	0.91535	1.21558	1.25056
EPS8L1	0.954545	0.837524	1.12863	1.26692
EPS8L2	0.964546	0.984359	1.50052	1.66215
ERAP1	0.954262	0.920998	1.41892	1.39917
ERBB2	0.997893	1.04953	1.15911	1.34563
ERBB2IP	1.00903	0.989842	1.24605	1.27878
ERCC1	1.02364	0.955807	1.08839	1.2148
ERCC4	1.72699	1.42122	2.79407	1.87363
ERLEC1	0.98434	0.98434	1.32774	1.34899
ERLIN1	0.914869	0.99546	1.04086	1.16118
ERMP1	1.04389	1.11808	1.13271	1.39185
ESAM	0.92333	1.15553	1.24535	1.28587
ESPL1	0.979381	0.979381	1.10309	1.16804
ESYT1	0.964036	0.933067	1.14386	1.23177
EVA1B	0.736842	0.826679	0.956443	1.2931
EVI5	1.0542	0.891593	1.18473	1.06527
EVPL	1.01197	0.927256	1.27716	1.33333
EXOC6	0.949045	0.922505	1.12951	1.0966
EXOC6B	1.03638	1.08732	1.20582	1.39605
EXOC7	1.05544	0.965885	1.23134	1.20896
EXOC8	1.01349	0.988589	1.15249	1.24585
F11R	1.11169	1.10962	1.29059	1.32782
F2	1.19941	0.868369	1.59725	1.18369
F3	1.03626	0.933206	1.75573	1.68321
F5	0.903448	1.06092	1.18046	1.34023
FAH	0.996334	0.963336	1.13382	1.15582
FAM105A	0.91785	0.918864	1.13692	1.25862
FAM107B	1.03377	0.964353	1.30113	1.15385
FAM111A	1.06258	1.05174	1.3225	1.51143
FAM114A1	1.07788	0.841986	1.43679	1.17946
FAM120B	1.17416	1.02697	1.31573	1.41685
FAM126A	1.10621	0.968974	1.35919	1.43914
FAM129A	1.17808	1.00761	2.41553	2.35312
FAM134A	0.953089	1.0778	1.07323	1.29291
FAM160A1	0.978485	1.0159	1.04864	1.26099
FAM160B1	1.01217	1.10142	1.34787	1.67748
FAM160B2	0.756379	0.890535	1.00658	1.01811
FAM168A	0.992574	1.08168	1.27351	1.67574
FAM171A2	1.17078	0.970999	1.52309	1.27282
FAM178A	1.04104	1.08955	1.33458	1.32214
FAM188A	1.11466	1.06725	1.22381	1.29107
FAM199X	1.10391	1.35088	2.22672	1.49663
FAM213A	1.06417	0.893048	1.34225	1.15508
FAM21C	1.44705	0.90078	1.69788	1.12486
FAM45B	0.990854	0.933943	1.07927	1.18801
FAM64A	1.02908	0.957425	1.09761	1.20768
FAM73B	0.927369	1.0062	1.1116	1.12843
FAM76B	0.927235	0.879418	1.06861	1.03742
FAM82B	0.957289	0.904364	1.10399	1.04364
FAM83D	1.16264	1.07363	1.31868	1.51868
FAM83H	1.00336	0.923852	1.31579	1.38746
FAM98C	1.05437	0.998934	1.24414	1.18017
FANCD2	0.958852	0.963636	1.06986	1.16938
FARP1	0.940669	0.998921	1.36246	1.59223
FAS	0.973958	1	1.11979	1.31667
FBXL17	1.03662	0.860094	1.0939	1.26948
FBXO2	1.08824	0.695294	1.77765	1.29059
FBXO44	0.950282	1.12994	1.45876	1.20791
FCHSD1	1.12081	1.07297	1.35646	1.25359
FEM1B	0.898197	0.987275	1.07953	1.2492
FER	0.972795	1.02814	1.15385	1.394
FERMT2	1.01017	0.838418	1.37853	1.36271
FGF2	0.952886	0.987044	1.15901	1.49588
FGFR4	0.893138	0.973003	1.14061	1.19798
FHL1	1.1677	1.17547	1.47205	1.99845
FHL2	0.933865	1.02509	1.44812	1.43444
FLII	0.979499	0.946469	1.24146	1.39294
FLNA	1.05751	0.913146	1.48122	1.19953
FLNB	1.06605	0.891078	1.72769	1.4635
FLNC	1.04405	0.889868	1.46843	1.35977
FLYWCH2	0.985626	0.870637	1.08316	1.05955
FNBP1	1.01025	0.888383	1.13781	1.28246
FNDC3B	1.0523	1.01426	1.31854	1.42314
FNTB	1.08503	0.884354	1.24036	1.05329
FOXC1	1.26389	1.16528	1.81806	1.46111
FRAS1	1.0772	0.93943	1.25416	1.20665
FUCA1	0.998925	0.936559	1.25591	1.62258
FUCA2	0.97123	0.987103	1.14683	1.21329
FZD6	0.942825	1.12444	1.33969	1.70516
G6PD	0.973108	1.0249	1.23406	1.38546
GABARAPL1	1.30898	1.50731	1.64301	2.57411
GALNT10	0.906856	0.990944	1.3066	1.35705
GALNT7	0.964789	1.03169	1.24883	1.69601
GALT	1.13308	1.12935	1.3893	1.65423
GAN	0.950386	0.862183	1.14553	1.03969
GAS2L1	1.00986	0.828402	0.960552	1.19132
GAS2L3	1.03518	1.07037	1.18133	1.5318
GBE1	1.02246	0.988235	1.20535	1.31123
GBF1	0.992561	0.974495	1.17747	1.25292
GCA	1.00305	0.900305	1.25941	1.21668
GCLM	1.05006	1.03782	1.35261	1.46385
GDA	1.02234	0.95736	1.24467	1.19797
GFPT1	0.979888	0.884916	1.50726	1.44693
GGA2	0.994737	0.944211	1.18632	1.20947
GGH	0.979432	0.947111	1.25073	1.26543
GHDC	1.12303	0.931651	1.13144	1.26078
GIT2	1.01071	0.795503	1.30621	1.28266
GJC1	0.935841	0.839602	1.09292	1.19248
GLB1	1.01652	0.979592	1.14091	1.18367
GLCE	1.03254	0.982646	1.17028	1.25813
GLG1	0.968421	1.04785	1.14833	1.35502
GLI2	1	1.18777	1.65007	1.6899
GLIPR2	1	1.13176	1.05968	1.61712
GLS	0.887192	0.904818	1.23972	1.19389
GLUL	0.976378	0.931759	1.31365	1.36614
GM2A	1.14225	0.973262	1.67273	1.40428
GMIP	1.02597	0.998918	1.32684	1.18182
GNAS	0.992135	0.974157	1.09663	1.16517
GNE	0.960946	0.897225	1.12333	1.11408
GNG7	0.850416	0.856879	1.21976	0.979686
GNPTAB	1.05391	0.97463	1.39641	1.13425
GOLGA4	1.03862	0.882046	1.25365	1.11378
GOLGB1	1.06818	0.892562	1.21178	1.07748
GOPC	0.954071	0.990605	1.17641	1.27766
GORAB	1.11552	1.04452	1.42599	1.39711
GOSR2	0.927308	0.949902	1.25835	1.33202
GOT1	0.971396	0.922197	1.45309	1.3913
GPC1	0.946012	0.872393	1.13252	1.08098
GPD1	0.941176	0.827206	1.21415	0.878676
GPR107	1.0618	0.888551	1.15096	1.25937
GPRC5A	1.01473	0.875502	1.88889	1.95315
GPX1	1.08175	1.06991	1.50474	1.64692
GPX8	0.977444	1.00877	1.40602	1.58521
GRB10	0.899526	0.78673	0.932701	1.28057
GRN	0.945279	0.992489	1.05687	1.19528
GSK3B	0.960703	0.957601	1.1241	1.18304
GSTP1	1.21978	1.08242	1.25934	1.46264
GSTT2	0.996583	1.00911	1.26538	1.33599
GTF2H5	1.07925	0.955711	1.65268	1.31235
GTSE1	0.97584	1.08298	1.19748	1.46429
GULP1	0.963795	1.01498	1.28964	1.41323
GYG1	1.00103	0.945304	1.24458	1.15996
GZF1	0.896217	0.900097	1.06305	1.10669
HABP4	0.970621	1.0226	1.16723	1.24633
HADHA	0.922776	1.03324	1.1437	1.31672
HADHB	0.968847	1.07892	1.11734	1.34476
HBA1	1.20385	0.971687	1.38958	1.36806
HDAC6	1.01124	0.846067	1.32697	1.35281
HDHD2	0.966901	0.96991	1.18154	1.13541
HEATR7A	0.935452	0.919563	1.17378	1.27408
HECTD4	0.963071	0.922255	1.11662	1.13994
HELZ2	1.02141	0.994647	1.26874	1.3833
HERC4	0.982846	1.03633	1.09384	1.25429
HEXIM1	1.00722	0.928866	1.15258	1.13402
HIF1AN	1.02132	1.00556	1.30028	1.34198
HIP1	1.01224	0.977551	1.19592	1.18469
HJURP	1.05603	0.986602	1.14495	1.24848
HLA-A	1.24213	0.957627	1.56659	1.28814
HLA-B	0.991774	1.00705	1.29847	1.36898
HLA-E	0.954497	0.964021	1.07196	1.24444
HM13	0.961194	0.985075	1.12239	1.21294
HMGCL	0.967042	0.993929	1.11275	1.1804
HMGXB3	1.38579	1.36212	2.08914	1.3468
HMHA1	1.07733	0.782839	1.11758	1.23093
HMMR	1.00916	1.00509	1.22787	1.34486
HNF4A	1.06235	0.92176	1.27751	1.24572
HNRNPR	0.517219	0.645224	0.756985	0.837557
HOMER3	0.951923	0.873077	1.12404	1.00865
HOOK3	1.03098	0.885998	1.46344	1.43742
HOXB7	0.916031	0.912977	1.61221	1.96641
HOXB8	1.07857	0.709524	1.22619	1.1119
HOXB9	0.737483	0.813261	1.28281	1.33018
HPS3	1.35157	1.16005	1.92066	1.44596
HPS5	0.966316	0.956842	1.17263	1.11579
HRAS	0.945752	0.943705	1.07984	1.09826
HSD17B11	0.949829	0.994299	1.27708	1.44356
HSPA13	0.990488	0.9239	1.36266	1.18312
HSPA2	1.06331	0.930832	1.23916	1.17585
HSPB11	1.11808	0.990596	1.26019	1.32079
HSPB8	1.01713	0.90364	1.46788	1.29764
HSPE1-MOB4	1.038	0.991	1.164	1.194
HSPG2	0.745781	0.89135	1.43354	1.29641
HTATIP2	0.987248	0.867163	1.18704	1.22848
HUWE1	0.986721	0.994893	1.43514	1.29928
HYI	1.18127	0.907543	1.48905	1.35766
IBA57	0.922432	0.968553	1.11845	1.22642
IDH1	1.01134	1.00436	1.20506	1.2993
IDI1	0.980913	0.917842	1.11618	1.07054
IFI35	0.879775	0.935955	1.59101	1.66742
IFIT1	0.888542	0.897917	1.74792	2.04375
IFT27	1.10081	0.956212	1.37271	1.14664
IGF1R	1.20084	1.02929	1.68759	1.80195
IGF2R	1.00328	0.954148	1.27074	1.37882
IGFBP6	1.08996	2.32218	2.27615	2.21967
IGSF3	0.963345	0.885452	1.15235	1.25315
IKBIP	1	0.91853	1.97923	2.05431
ILVBL	0.896158	0.955348	1.0945	1.08827
IMPA1	1.01185	0.99309	1.20039	1.23297
INADL	1.10854	0.964824	1.27236	1.19497
INPP1	0.95544	0.990674	1.3057	1.39793
IQGAP1	0.978166	0.978166	1.41376	1.38646
IQGAP2	1.05528	1.0688	1.39312	1.86364
IQGAP3	0.973369	0.945406	1.72437	1.63382
IQSEC2	0.790816	0.64881	0.879252	0.784864
IRGQ	1.01896	0.953009	1.26216	1.15416
IRS2	0.990155	0.973277	1.40084	1.27848
ISCA2	1.04481	0.908197	1.18361	1.0929
ITCH	0.977918	0.790747	1.11251	0.963197
ITFG1	1.32235	1.07827	1.5242	1.32544
ITGA3	0.994695	0.965517	1.77984	1.87666
ITGA5	1.06044	1.04945	1.28297	1.33791
ITGA6	1.0271	0.91871	1.55742	1.54968
ITGAV	1.0179	0.954654	1.48449	1.42959
ITGB1	0.964871	1.00351	1.20609	1.19438
ITGB4	1.03026	0.90784	2.02476	2.0729
ITGB5	1.00763	0.882443	1.97557	2.08397
ITIH4	1.25787	1.25182	1.51453	1.546
ITM2C	0.948298	0.929382	1.46406	1.6053
ITPRIP	0.890816	1.10408	1.17143	1.37245
ITSN1	1.00954	0.985154	1.27147	1.34889
JAK1	0.882175	0.803625	0.95569	0.98993
JOSD2	1.26316	0.995104	1.52876	1.4284
JUN	1.17437	0.627477	1.64597	1.01453
KANK2	0.988864	0.926503	1.32628	1.38085
KCTD10	0.967513	0.974619	1.17665	1.05888
KCTD15	0.935523	1.11192	1.32725	1.04623
KCTD9	0.955682	0.948864	1.32955	1.34318
KDELC2	0.931336	0.802747	1.43695	1.54931
KDELR1	1.03641	1.03754	1.12742	1.26166
KIAA0101	0.911007	1.16276	1.27166	1.93794
KIAA0196	1.02677	1.0257	1.18951	1.2227
KIAA0922	0.914401	0.968781	1.04834	1.17925
KIAA1033	0.953	0.987	1.095	1.221
KIAA1109	0.871444	0.943098	0.947313	1.47102
KIAA1217	0.979242	0.808664	1.13809	1.1074
KIAA1244	0.650425	0.50348	1.38824	0.642691
KIAA1432	1.1374	1.04421	1.51135	1.51971
KIAA1462	1.07854	1.02544	1.54535	1.43805
KIAA1468	0.964593	0.862201	1.15885	1.13301
KIAA1522	1.02748	0.927061	1.06237	1.1871
KIAA1598	1.02334	0.944911	1.26797	1.22502
KIAA1609	1.04742	0.950515	1.28866	1.53402
KIAA1715	0.974886	1.16096	1.15411	1.54452
KIF13B	0.921642	0.926306	1.09981	1.20149
KIF18B	1.00098	0.896484	1.03223	1.18457
KIF20A	1.02476	0.913886	1.32723	1.45748
KIF20B	1.02211	0.976884	1.20704	1.14372
KIF21A	0.96576	1.03827	1.17422	1.34441
KIF23	0.974566	1.04277	1.28555	1.49133
KIF2A	0.968205	1.04513	1.13333	1.3641
KIF4A	0.985991	0.977371	1.26078	1.33944
KIF5B	1.0254	1	1.24596	1.17206
KIFC3	0.804042	0.758348	0.949033	1.058
KIRREL	1.06579	0.960526	1.26794	1.33254
KLF4	0.754875	0.994429	1.63974	0.888579
KLHL11	0.809434	0.878302	0.906604	1.03491
KNTC1	1.02338	1.0457	1.17322	1.20935
KPNA2	0.974215	0.982063	1.1704	1.12892
KRT16	1.07819	1.03414	0.884361	1.96256
Krt18	1.06525	1.97064	2.64111	1.79935
KRT36	1.07895	2.35526	3.02632	4.36842
KRT8	1.01463	0.976829	1.66829	1.55
KRT82	0.967626	1.02518	1.54317	1.31295
L1CAM	1.04589	0.89557	2.52373	2.08861
LAMB1	1.0711	0.848485	1.44988	1.4021
LAMP1	0.976167	0.991063	1.19067	1.285
LAMP2	0.97031	0.956815	2.49798	1.61943
LANCL1	1.04479	1.03311	1.1704	1.35443
LAPTM4A	1.07194	0.634121	1.31552	0.852004
LASP1	1.03796	1.04058	1.49869	1.67016
LBR	0.971631	1.05268	1.26545	1.19453
LCOR	0.993697	0.865546	1.14496	1.01681
LEPRE1	1.01294	0.88	1.23412	1.08824
LEPROT	1.51912	1.16107	2.07184	2.34878
LGALS1	1.36429	0.907143	2.44143	1.55143
LGALS3	0.97354	0.992701	1.2427	1.2865
LGALS3BP	0.952657	0.901449	1.23768	1.23961
LGALS8	0.965831	0.973804	1.18793	1.45216
LIMD2	1.04167	1.22727	1.9053	3.04545
LIMS1	0.887514	0.928009	1.2306	1.31271
LIN37	0.965255	0.964169	1.20304	1.20955
LIN54	1.00239	1.03465	1.21386	1.41338
LIPE	1.05456	0.807975	1.08185	1.23505
LMAN2	0.959239	0.978261	1.12772	1.2817
LMAN2L	1.05655	0.969655	1.5531	1.70897
LMF2	1.01236	0.949438	1.35393	1.37865
LMNA	0.985442	1.00336	1.30235	1.12654
LMO7	1.02	0.83	2.78667	2.77333
LOC113230	1.03217	0.946691	1.19301	1.20956
LOC550643	0.546988	1.24699	0.562651	1.68434
LPCAT2	0.89536	0.914116	1.16979	1.17868
LPGAT1	0.965217	0.976087	1.24891	1.70326
LPIN3	0.883677	1.08912	1.18574	1.27392
LPP	0.937083	1.08008	1.10677	1.48141
LRCH4	0.897877	0.899899	1.21031	1.18706
LRRC42	1.02022	0.969666	1.24469	1.27604
LRRFIP1	1.05556	0.78744	1.59058	1.15338
LRRFIP2	1.12474	0.980973	1.426	1.21247
LSM14A	0.989247	1	1.16559	1.26667
LSS	0.953737	1.07562	1.04715	1.3194
LYRM1	1.12774	1.21776	1.61314	1.94526
LYSMD3	1.36082	1.08634	1.3183	1.57474
LZIC	1.09931	0.743363	1.30973	0.848574
LZTS2	0.944498	0.844976	1.16172	1.07464
MACF1	0.969887	0.930991	1.22585	1.32497
MAGEB1	1.01001	0.947067	1.48212	1.68956
MAGED2	0.967634	1.05134	1.14955	1.33929
MAGT1	0.976744	1.07198	1.18051	1.3278
MALT1	1.01576	0.952727	1.44848	1.57333
MAN2B2	0.829579	0.889324	1.22723	1.30656
MAP1B	1.03805	0.738204	1.85084	1.5997
MAP2	1.04604	0.90717	1.54868	1.56981
MAP2K1	0.993884	0.953109	1.18756	1.12742
MAP2K2	1.0086	0.949462	1.1957	1.15806
MAP3K5	1.0485	0.739938	1.17957	1.20021
MAP4	1.05053	1	1.17684	1.21263
MAP4K3	1.0117	0.9	1.06596	1.16064
MAP7D1	0.882166	0.9862	1.06263	1.44904
MAPK3	0.818949	0.983114	1.09568	1.10225
MAPKAP1	0.600877	0.904386	1.00088	0.989474
MB21D2	1.09111	0.975556	1.51778	1.43222
MBNL2	1.1908	1.41056	1.60818	1.92845
MBOAT2	0.883144	0.936918	1.31437	1.73216
MBTPS2	0.865801	0.858225	1.16017	0.930736
MCCC1	0.932759	0.878448	1.05862	1.1181
ME1	1.02478	1.02973	1.21011	1.29237
MECP2	1	0.915217	1.14239	1.12717
MED19	0.78021	0.617338	0.692644	1.00876
MEX3C	1.04891	0.841304	1.0087	1.28043
MFHAS1	1.09443	1.02275	1.15813	1.37998
MFI2	0.965209	0.928429	1.23459	1.45527
MFSD10	0.993399	0.942794	1.21012	1.23212
MFSD6	0.767045	0.814123	0.839286	1.01299
MFSD8	1.10993	1.10757	1.31678	1.36761
MGAT4B	1.21336	0.939655	1.24677	1.2403
MICA	0.446092	0.543801	0.871294	0.831536
MICAL1	1.0241	0.944578	1.69036	1.8241
MICAL2	0.941176	1.08766	1.07497	1.40023
MICALL1	1.03965	0.980176	1.17952	1.5793
MICALL2	0.857602	1.02891	1.1531	1.34261
MID1	1.04977	0.982639	1.375	1.57639
MKL1	1.04569	1.081	1.12565	1.38941
MKL2	0.928138	1.00101	1.21457	1.42105
MLEC	0.959103	0.941953	1.16887	1.27573
MLPH	0.825137	0.677596	1.22404	1.11803
MMP14	0.923523	0.987254	1.28389	1.45539
MOCOS	1.06341	1.22245	1.08524	1.60083
MON1B	0.929591	0.836346	0.899144	1.13796
MORC4	1.31259	1.13333	1.63407	1.42074
MOSPD2	1.01747	0.902364	1.40699	1.43371
MPC2	0.913378	1.03946	1.09336	1.22522
MPDU1	1.01147	1.08968	1.00938	1.44943
MPP2	0.963243	0.965405	1.26054	1.37514
MPP5	0.978395	0.962963	1.20885	1.35905
MPRIP	1.00655	0.896288	1.15611	1.09934
MPZL1	0.987421	0.951782	1.29979	1.39832
MRC2	0.975689	0.734198	2.2658	2.4846
MRPS36	0.922297	1.04279	1	1.27252
MSANTD2	0.741028	0.677013	0.876819	0.842871
MSN	1.02573	1.03579	1.30313	1.19463
MSX1	1.05277	0.905013	1.63325	1.73351
MTHFS	1.08872	1.03286	1.13363	1.35268
MTM1	1.16412	1.11323	1.42748	1.84733
MTMR10	1.02875	0.939425	1.26797	1.51745
MUL1	0.647303	1.08506	1.14834	1.09647
MVP	1.03055	1.04223	1.13208	1.28032
MXRA7	1.0363	1.0132	1.36744	1.21672
MYADM	0.898324	0.637989	1.35754	1.57318
MYBL2	0.606029	0.996881	0.941788	1.07173
MYD88	0.995192	1.0875	1.10192	1.33942
MYH10	1.03199	0.944272	1.2291	1.20124
MYH14	1.01906	0.922768	1.18154	1.1655
MYH9	1.02768	0.970012	1.42791	1.26067
MYL12A	1.02558	0.956618	1.42158	1.4505
MYL6	1.23492	0.787302	1.84656	0.98836
MYL9	1.1615	0.916021	1.4845	1.51938
MYO1C	0.949275	0.960145	1.30314	1.17271
MYO1D	0.954128	1.0051	1.0581	1.20897
MYO1E	0.998947	1.08737	1.11579	1.33158
MYO5B	0.966736	0.95738	1.22245	1.46362
MYO5C	0.91399	0.924352	1.19482	1.32435
MYOF	0.983645	0.985981	1.43925	1.6285
NAGK	0.99177	0.963992	1.41667	1.38889
NANS	1.15347	0.944307	1.36881	1.3552
NAP1L1	1.18071	0.970558	1.62538	1.00609
NAPG	1	0.889111	1.21878	1.01798
NCAM2	0.907071	0.629293	1.53737	0.809091
NCAPD2	1.01524	0.996483	1.27784	1.47948
NCAPD3	0.972619	0.971429	1.24286	1.39167
NCAPG	0.974041	0.962754	1.27427	1.27201
NCAPG2	1.031	0.974742	1.23995	1.35247
NCAPH	1.02257	0.876975	1.36343	1.18962
NCAPH2	1.02748	1.00597	1.4098	1.3644
NCEH1	0.979876	1.00155	1.61455	1.51238
NCKAP1	1.00412	1.01236	1.1174	1.25438
NCOA4	1.26258	1.16196	1.47853	1.5546
NCOR1	0.959116	0.864088	1.20221	1.14696
NDFIP1	0.831849	1.04343	1.17483	1.34076
NDFIP2	0.896833	0.861538	1.08416	1.06244
NDRG2	0.743333	0.756667	1.05833	0.7975
NEBL	0.931529	0.851911	1.84236	2.71338
NECAP2	0.983454	0.960703	1.15305	1.16339
NEDD4	1.01743	0.850763	1.16558	1.01525
NEDD4L	1.00686	0.872	1.29943	1.22743
NEIL3	0.981092	1.1187	1.09454	1.42017
NEK1	0.928183	0.96518	1.11317	1.17084
NEK6	1.00119	0.830751	1.17878	1.19309
NEK9	0.97042	0.953244	1.09256	1.16985
NES	1.00603	0.856454	1.80097	1.60314
NF2	1.03548	1.02234	1.46255	1.50986
NFAT5	0.962195	0.713415	1.06951	0.865854
NFATC2	0.944764	0.837745	1.26352	1.36249
NFATC3	0.947972	1.07672	1.05203	1.29718
NFKB2	1.04241	0.946429	1.21987	1.25781
NFKBIE	0.893939	0.977273	1.13203	1.10498
NFYC	0.97371	0.951315	1.10127	1.13145
NGFR	1.06265	0.893976	1.23373	1.54337
NGRN	0.927611	0.854188	1.09617	1.0879
NHLRC2	1.03551	0.959908	1.26804	1.36884
NHS	1.01711	0.82139	1.38717	1.17219
NIPSNAP3A	1.16783	1.0979	1.38695	1.71678
NISCH	0.99384	0.966119	1.19405	1.16427
NMT1	0.961197	1.06874	1.06652	1.26829
NOTCH3	0.970024	0.823741	1.10911	1.30216
NPEPL1	0.914962	0.975242	1.45425	1.5253
NPTN	1.02169	0.942169	1.26747	1.41446
NQO1	0.994839	0.996129	1.91613	2.53419
NSFL1C	1.13163	0.856122	1.31327	1.02245
NT5C2	1.03176	0.993428	1.32202	1.43483
NT5DC3	1.02205	0.957001	1.23705	1.28886
NT5E	0.967742	0.954394	1.14683	1.14349
NTAN1	0.913228	0.916402	1.10265	1.0709
NUB1	1.01938	0.978335	1.33865	1.53478
NUCB2	1.17946	0.697297	1.77946	1.13622
NUDT16L1	0.998817	0.949112	1.1574	1.22722
NUF2	0.971687	0.976217	1.15968	1.24462
NUMB	1.01264	1.01724	1.33563	1.53333
NUMBL	0.940141	0.807512	1.08803	1.01643
NXN	1.01908	0.919192	1.15713	1.14478
OAS3	1.01616	1.05354	1.32222	1.6
OAT	0.962926	0.897796	1.31563	1.1994
OCRL	0.961216	0.925577	1.08281	1.11111
ODC1	1.17354	0.886598	1.60825	1.85739
OPHN1	1.13424	1.09784	1.21957	1.42321
OPTN	1.19406	0.916667	1.75571	1.53425
ORMDL2	0.86059	0.955317	0.950849	1.25112
ORMDL3	0.926527	0.965649	1.14981	1.17271
OSBP	0.971341	1.03173	1.14534	1.30502
OSBPL2	1.01054	0.925184	1.18757	1.21496
OSBPL3	0.959911	0.971047	1.34633	1.51336
OSBPL5	0.960432	0.855216	1.2554	1
OSMR	1.09182	1.16194	1.79466	1.69783
OSTM1	1.01057	0.932347	1.26533	1.00317
OTUD5	0.764508	0.736754	1.00841	0.993272
OVCA2	0.884774	0.841564	1.25514	1.00103
PACS1	0.98528	1.0157	1.105	1.31698
PACSIN1	1.01262	0.899054	1.43954	1.48686
PACSIN2	1.07006	0.967232	1.56723	1.51412
PALM	0.889617	0.795628	1.23716	1.21639
PALM3	1.09763	0.778364	1.7467	1.84697
PAPD4	0.97867	1.02509	1.23588	1.19197
PAPSS1	1.01166	1.05408	1.22694	1.46235
PAPSS2	1.05718	0.865691	1.58511	2.02926
PAQR7	0.950441	1.10132	1.42181	1.52643
PARP12	1.07378	0.948922	1.33825	1.50284
PARP14	0.956434	0.927052	1.16819	1.38095
PARP9	0.928355	0.938446	1.42482	1.51564
PARVA	0.978372	0.935115	1.50763	1.49109
PBK	1.01499	1.03134	1.30381	1.32425
PC	0.971574	0.942132	1.11878	1.1736
PCBD2	1.11871	1.0012	1.28537	1.39209
PCBP4	0.935445	0.950061	1.33983	1.45311
PCGF2	1.08978	0.582222	1.69156	0.716444
PCK2	1.01552	1	1.27051	1.42572
PCYOX1	0.98847	0.98218	1.30189	1.45073
PCYT2	0.950281	1.02814	1.1454	1.24765
PDCD7	0.629518	0.735693	0.762048	0.813253
PDE12	0.986562	0.865622	1.10974	1.14222
PDE5A	1.66816	1.84978	3.94395	3.11659
PDLIM1	1.08178	0.968458	1.68224	1.29673
PDLIM2	1.04856	0.843832	1.78084	1.93438
PDLIM3	0.963953	0.869767	1.35465	1.49302
PDLIM5	1.04211	1.02632	1.64035	1.74386
PDLIM7	0.977472	0.98373	1.29912	1.42428
PDPK1	0.989613	0.931067	1.12087	1.19736
PDS5A	1.42453	2.36321	4.64387	2.72642
PDS5B	0.95163	0.971609	1.0715	1.204
PDXDC1	1.02665	1.08824	1.18382	1.27114
PDZD11	1.06313	0.842165	1.3292	1.32807
PEA15	1.14703	0.704865	1.43892	0.911351
PEAK1	0.956835	0.690647	1.15519	1.1593
PEX16	1.03909	0.871399	0.965021	1.2428
PEX6	0.910593	0.862974	1.07094	1.03596
PFN2	1.00321	1.01283	1.1893	1.35829
PGM1	0.968208	0.993256	1.11175	1.20135
PGM2L1	0.956473	0.91183	1.35491	1.63393
PHACTR2	1.18268	1.08131	1.36642	1.48997
PHACTR4	1.00101	0.879919	1.04036	1.2331
PHC3	1.06633	1.01709	1.34472	1.29849
PHF1	1.01364	0.901136	1.20909	1.36477
PHF15	0.646048	1.02291	1.2394	1.10195
PHF17	0.895135	0.868108	1.06811	1.07243
PHF19	0.962096	0.866221	1.09476	1.0981
PHF2	0.808862	0.688966	1.05213	0.815812
PHGDH	0.96792	0.982301	1.41482	1.41593
PHLDB1	1.00813	0.961382	1.14634	1.25915
PHLDB2	0.974914	0.930445	1.20525	1.30103
PHLPP2	1.10233	0.95814	1.13209	1.34233
PHPT1	1.12162	0.98536	1.27703	1.19144
PI4KA	0.963001	0.951696	1.13464	1.24255
PI4KB	0.991534	0.828571	1.08571	1.13228
PIK3AP1	1.10526	0.870614	1.69408	1.77632
PIP4K2A	0.951274	0.933555	1.11628	1.21816
PIP4K2B	0.891697	0.909747	1.05325	1.10469
PIR	1.0828	1.03609	1.42251	1.01699
PITRM1	1.03148	1.00105	1.16264	1.20986
PKM	0.938883	0.893572	1.15385	1.13593
PLA2G15	0.943966	0.940733	1.02047	1.29634
PLCD1	1.07095	0.939189	1.37838	1.39189
PLCD3	0.915408	0.939577	1.05539	1.22155
PLCG1	1.05975	1.32694	1.48816	1.4487
PLD1	1.0291	0.785797	1.36088	1.41909
PLEC	0.895161	0.5681	1.13262	1.0009
PLEKHA2	0.845985	0.908691	1.57976	1.9615
PLEKHF1	1.08082	1.15199	1.19783	1.43185
PLEKHF2	1.07668	0.84345	1.31416	1.15016
PLEKHH2	1.32419	1.74516	2.24355	1.95806
PLEKHO2	1.04567	1.00937	1.48829	1.53981
PLK1	1.03641	1.06712	1.25142	1.43914
PLS3	1.03437	0.957035	1.40816	1.37916
PLXNA1	1.04392	0.994369	1.27815	1.48536
PML	0.961211	0.997162	1.18638	1.25071
POC1A	1.07805	1.13659	1.33537	1.25732
POLR1A	0.93658	1.03851	1.2231	1.0487
POR	1.00591	1.04019	1.46099	1.80851
PPFIA1	1.07725	0.849785	1.20815	1.11052
PPFIA3	1.03587	1.00785	1.2074	1.24439
PPFIBP1	1.03084	0.863582	1.35469	1.27995
PPIC	0.951475	1.00285	1.24643	1.31874
PPIP5K2	1.02343	0.984026	1.12354	1.24388
PPL	1.04826	0.977985	1.2337	1.37341
PPM1B	1.11419	0.966916	1.35646	1.32657
PPME1	0.987654	0.962963	1.43333	1.45432
PPP1R12A	1.04767	0.923503	1.24279	1.23392
PPP1R12C	1.03249	0.979695	1.19594	1.21117
PPP1R13L	0.994577	0.990239	1.218	1.38395
PPP1R14C	1.42533	1.22554	2.25129	1.34706
PPP1R18	0.97046	0.922319	1.23414	1.23742
PPP1R2	1.18591	0.829099	1.72864	1.0843
PPP1R37	0.994903	0.945973	1.15596	1.21305
PPP2R1B	1.00447	1.06152	1.22707	1.33893
PPP2R5A	0.985216	0.961985	1.18479	1.07286
PPP2R5D	0.976325	1.02368	1.11499	1.2469
PRAF2	0.852071	0.99645	1.16568	1.33846
PRAME	0.910766	0.917556	1.0582	1.05238
PRC1	1.02669	1.02875	1.14784	1.3039
PRCP	1.05994	1.04311	1.23975	1.45846
PRF1	0.858385	0.749068	1.25217	1.26708
PRKAA1	0.953027	0.919624	1.12839	1.24322
PRKAB1	0.898789	0.802768	1.03201	0.975779
PRKAG2	1.0395	0.899549	1.59481	1.6535
PRKCA	1.01956	0.912647	1.54759	1.8631
PRKCD	1.01197	0.981502	1.24048	1.42546
PRKCDBP	0.984326	0.92581	1.20481	1.14316
PRKCE	0.91022	0.818529	0.954155	1.03725
PRKCZ	0.986193	0.930966	1.11933	1.11933
PRMT10	0.804188	0.831414	0.988482	1.1466
PRMT2	0.824923	0.838311	1.21936	1.21009
PRNP	0.998582	1.04823	1.4227	1.84255
PRR11	0.82996	0.97166	1.27935	1.45142
PRR12	0.979036	0.933962	1.18763	1.09644
PRRG1	0.879648	0.882583	1.27789	0.96184
PSAT1	1	1.12769	1.44374	1.30973
PSMB10	0.850412	1.20141	1.63722	2.16137
PSMB9	1.02542	1.15054	1.23949	1.565
PSME1	1.02074	0.918002	1.28087	1.20358
PSPH	0.911063	0.922993	1.35466	1.12256
PSRC1	1.15574	1.20355	1.48361	1.57514
PTGFRN	1.19465	1.06813	1.49878	1.44039
PTGR1	1.04343	0.890845	1.35094	1.44249
PTK7	0.971933	0.992723	1.14033	1.35551
PTP4A2	0.962656	1.01037	1.13693	1.36307
PTPN1	1.02217	1.04434	1.25204	1.44924
PTPN12	1.01987	0.926049	1.3223	1.38852
PTPN9	1.03931	1.07514	1.29133	1.52832
PTPRA	0.975661	0.934392	1.30582	1.18307
PTPRG	0.954936	1.06009	1.10193	1.37232
PTPRS	1.07195	0.946341	1.15122	1.33293
PTTG1	1.07519	1.00501	1.22055	1.22932
PTTG1IP	1.08748	1.20996	1.70794	2.10094
PUM2	1.0506	0.889881	1.25595	1.24702
PURA	1.00106	0.952128	1.14574	1.16596
PVRL2	1.00493	1.01233	1.36498	1.44636
PXMP2	0.851715	1	1.1177	1.34013
PXMP4	1.07591	1.0308	1.48295	1.47855
PYGB	0.960836	0.907311	1.3812	1.48172
QKI	0.978703	1.06873	1.22265	1.64376
RAB11B	0.960317	1.01587	1.14583	1.18948
RAB11FIP1	0.992359	1.11557	1.15282	1.43744
RAB11FIP5	1.0678	1.11123	1.21716	1.39195
RAB15	0.768478	1.14891	1.27391	0.977174
RAB20	1.00147	1.26549	1.79794	1.65192
RAB21	1.03681	0.969325	1.21718	1.2589
RAB22A	1.01522	1.00703	1.16628	1.18852
RAB23	0.98237	0.994123	1.14006	1.30558
RAB27A	1.00528	0.788807	1.09926	1.16473
RAB2A	0.948258	0.965153	1.06336	1.15628
RAB35	0.976351	1	1.10811	1.26239
RAB3B	1.07166	1.15309	1.87459	1.93811
RAB3GAP1	1.00721	0.962925	1.18229	1.28527
RAB3GAP2	1.01812	0.978678	1.32623	1.36994
RAB43	0.963868	1.00956	1.16791	1.48247
RAB5A	0.984375	0.941964	1.23214	1.23772
RAB5B	1.03552	0.92465	1.4155	1.35737
RAB6A	0.995103	1.04701	1.10774	1.31244
RABGAP1L	0.983083	0.899436	1.08647	1.15038
RABGGTB	1.0045	0.905512	1.28121	1.29809
RABL3	0.92998	0.940828	1.12722	1.03452
RAC2	0.916268	0.886364	1.57416	1.67105
RACGAP1	1.0172	0.934409	1.26452	1.29677
RAD9A	1.13294	1.01075	1.46334	1.10459
RALB	1.16355	0.957944	1.39603	1.31425
RAP1B	0.917258	0.827423	1.08392	1.07092
RAP1GAP2	0.769928	0.769928	1.01812	1.11413
RAP2A	1.07674	1.8093	2.92093	1.9814
RAPH1	0.963084	0.887079	1.2823	1.40934
RASAL2	0.879208	0.89802	1.00693	1.12178
RASSF1	1.0225	0.96375	1.94625	1.155
RASSF2	1.03834	1.046	1.32421	1.39102
RB1	0.957031	0.959961	1.12891	1.22754
RBM23	0.70802	1.03885	0.926065	1.36842
RBM38	0.969957	1.06009	1.37196	2.0701
RBM4B	1.17267	1.27578	1.19627	1.79006
RBM5	0.982888	1.00214	1.10802	1.23743
RBMS1	1.09036	1.04337	1.13614	1.41446
RBMS2	0.939709	1.08316	2.55094	3.13098
RBP7	1.00782	1.07709	1.1676	1.43911
RBPMS	0.976309	0.990025	1.67706	1.81297
RECQL	0.986126	0.991462	1.13447	1.21878
REEP3	1.0578	1.14913	1.39538	1.60347
REEP4	0.934857	1.01029	1.11086	1.18629
RELL1	0.912826	1.08517	1.12625	1.45892
RETSAT	0.964989	1.01751	1.27681	1.45295
RGP1	1.07684	1.06236	1.24388	1.65145
RGS19	0.890411	0.857143	1.03718	1.00489
RGS3	0.872238	0.847262	1.11912	1.04227
RHBDD1	0.773526	0.926577	1.07135	0.908997
RHEB	1.01458	0.982989	1.40826	1.62819
RHOB	0.912698	0.740363	1.06463	0.854875
RHOBTB3	0.937813	1.04012	1.03511	1.37914
RHOC	0.921483	0.959651	1.20065	1.49836
RHOG	1.02193	1.08004	1.08224	1.36184
RHOQ	0.754582	0.844196	1.06008	1.22301
RIOK3	0.88403	0.98289	1.19392	1.19202
RIPK4	1.01519	0.846291	1.41823	1.24039
RNF11	1.11386	1.07673	1.52723	1.66089
RNF13	1.01027	0.998858	1.30251	1.30023
RNF167	0.967471	0.896118	1.0724	1.14166
RNF170	1.11425	1.24774	1.31335	1.58145
RNF181	1.25201	1.09206	1.84695	1.23705
RNF185	0.838342	1.0829	1.05492	1.25699
RNF213	1.00211	0.973684	1.29895	1.49895
RNF220	0.924065	0.998832	1.27453	1.1285
RNF7	1.17706	0.845212	1.19376	1.19822
ROCK2	0.998845	1.04388	1.52194	1.77483
ROGDI	0.850476	1.00095	0.99619	1.1819
RP2	0.971326	0.927121	1.3859	1.39307
RPS6KA5	0.949328	0.961737	1.12927	1.30817
RRAS	0.983721	0.951163	1.13721	1.35116
RRBP1	1.19054	0.712162	2.24189	1.51351
RSU1	0.959607	0.980349	1.21725	1.35371
RTN2	0.928709	0.853565	1.07611	1.16956
RTN3	1.03135	0.824451	1.1233	1.01672
RUFY2	1.02567	1.02567	1.18786	1.3839
RUNX1	0.987288	0.875706	1.69774	1.88701
RUNX3	0.95045	1.02703	1.34459	1.5045
S100A10	1.01639	1.31311	1.57705	2.35246
S100A11	0.996255	0.982522	1.59925	1.77528
S100A4	1.22446	0.856242	1.22068	1.22068
SACM1L	0.935	0.958	1.187	1.277
SAMD4A	0.778959	0.674814	1.48459	1.16897
SAMHD1	0.920164	0.911975	1.24156	1.35517
SASS6	1.05623	1.043	1.44212	1.23264
SAV1	0.951613	0.835253	1.13364	1.05415
SBF1	1.01092	0.990175	1.18777	1.24672
SCAMP2	0.834248	0.592755	1.12184	0.841932
SCAPER	1.04918	0.869945	1.17814	1.28306
SCARA3	0.936799	0.814475	1.20489	1.18145
SCD5	0.977069	1.01296	1.12164	1.39681
SCPEP1	1.01151	1.00314	1.2249	1.39017
SDC1	1.39405	1.56918	1.73205	2.04729
SDF2	1.11876	0.916865	1.34204	1.43824
SDSL	1.06167	1.02751	1.19545	1.23909
SEC14L1	0.928401	0.843675	1.35919	1.22196
SEC14L2	1.22632	0.956579	1.40789	1.43026
SEC22B	0.904627	0.951841	1.05949	1.26629
SEC23A	0.887558	0.854378	1.13641	1.25806
SEC24A	0.99887	0.949153	1.17853	1.28701
SEC24D	0.97852	0.949881	1.321	1.46301
SEC31A	1.00102	0.957187	1.15596	1.17839
SEC62	1	1.00357	1.09037	1.22592
SECISBP2L	1.05635	1.04611	1.1834	1.39447
SELK	1.14385	1.26117	1.43994	1.89944
SEMA3B	0.921392	1.08505	1.82861	1.63789
SEMA4C	1.01806	1.10839	1.14839	1.33419
SEMA7A	1.0745	0.944126	1.4212	1.40258
SERINC1	1.04297	0.985677	1.39844	1.57943
SERINC3	1.00906	0.907351	1.12689	1.08258
SERPINA5	1.00824	0.969376	1.38163	1.34511
SERPINB1	0.975223	0.945491	1.34589	1.42319
SERPINB5	1.02496	0.946958	1.30577	1.33463
SERPINB6	1.05627	0.991115	1.17966	1.20336
SERPINB8	0.962406	0.779807	1.19334	1.0247
SERPINB9	0.994498	0.92022	1.31224	1.17331
SERPINE1	1.02475	1.77228	2.85396	2.78713
SERPINE2	1.02574	1.00772	1.37838	1.36551
SERPINH1	0.994638	0.906166	1.33244	1.23458
SESN2	1.07314	0.987429	1.20457	1.20229
SEZ6L2	1.09725	1.06407	1.18307	1.36957
SFXN3	0.891579	0.849474	1.10947	1.16632
SGK223	0.957682	0.805888	1.44894	1.06072
SGK3	0.892699	1.16261	1.0896	1.40155
SGMS1	0.859848	0.833333	1.06723	1.39205
SGMS2	0.968937	0.983274	1.15293	1.24851
SGOL2	0.924607	0.863874	1.1445	1.29529
SGPL1	0.984016	0.944056	1.2997	1.37163
SGPP1	0.961665	1.00876	1.20263	1.43812
SGTB	1.07778	0.870707	1.4	1.02121
SH3BGRL	1.17164	0.991471	1.6226	1.49574
SH3BGRL3	1.29358	0.923984	1.76802	0.963303
SH3BP4	1.02291	0.781671	1.82615	1.78976
SH3GLB1	0.952	0.99	1.134	1.166
SH3KBP1	0.975945	0.969072	1.36884	1.41695
SHB	0.958432	0.888361	1.30879	1.59857
SHC1	1.02797	0.940559	1.26573	1.26923
SHCBP1	1.05344	1.00103	1.37102	1.31346
SHOC2	0.929825	0.976264	1.07637	1.27554
SHROOM3	1.24214	1.03459	1.4717	1.2065
SIK2	0.959445	0.71825	1.22946	1.49093
SIMC1	0.86037	0.848049	0.974333	1.04825
SIRPA	0.983407	0.862832	1.16372	1.29425
SIX4	0.91805	0.886929	1.10892	0.990664
SLC12A4	0.890162	0.956065	1.12225	1.34766
SLC12A9	0.96169	1.04912	1.32318	1.31238
SLC16A3	1.0011	0.943045	1.16977	1.15225
SLC17A5	0.903825	0.84918	1.11257	1.1235
SLC1A1	0.778664	0.827517	1.51545	1.60718
SLC1A5	1.23641	1.11277	1.30707	1.63859
SLC20A1	1.11954	0.880463	1.22622	1.22365
SLC22A18	1.01524	0.926829	1.18089	1.5752
SLC23A2	1.15145	1.69265	4.24053	2.59465
SLC25A12	1.01082	1.09416	1.21212	1.32792
SLC25A20	0.986748	1.00102	1.18858	1.37411
SLC25A29	1.01967	1.01967	1.14645	1.25027
SLC25A30	0.946206	0.871278	1.12872	1.05476
SLC25A40	0.976355	0.900493	1.15961	1.41773
SLC2A1	1.0089	0.848754	2.83986	2.78648
SLC2A3	1.18792	1.01342	6.00336	6.94631
SLC2A8	0.968107	0.880658	0.990741	1.23868
SLC31A1	1.15194	1.05889	1.12367	1.63958
SLC39A14	0.964037	0.786543	1.30626	1.18213
SLC3A2	0.982609	1.07391	1.16196	1.29348
SLC44A2	0.948357	1.06964	1.05399	1.34038
SLC4A1AP	1.037	0.944502	1.21686	1.14388
SLC6A6	0.754074	0.774815	1.23259	1.08148
SLC7A1	0.922481	0.827243	1.12846	0.991141
SLC7A11	0.787156	1.05321	2.73945	3.39633
SLC9A6	0.964767	0.989637	1.22902	1.13161
SLC9A7	1.07335	1.05165	1.18492	1.40186
SLFN5	0.988465	1.05856	1.1331	1.42059
SMAD2	0.864322	0.936683	1.05327	1.1598
SMAD3	1.02709	1.01531	1.14488	1.21555
SMARCA1	0.944882	0.915636	1.15748	1.26772
SMARCA2	0.925197	0.95374	1.22343	1.60335
SMC4	0.974638	0.93599	1.33333	1.33333
SMCHD1	0.991011	0.989888	1.22809	1.33146
SMG9	1.02966	1.01186	1.24199	1.19217
SMPD2	0.99375	1.10833	1.27083	1.26354
SMURF2	1.0046	0.981609	1.38736	1.56667
SMYD4	0.954689	0.967334	1.06744	1.16544
SNRPC	0.964719	1.28445	0.998897	1.66483
SNTB1	0.981179	0.836888	2.11167	2.77415
SNTB2	1.02333	0.988335	1.21209	1.37328
SNX1	1.02159	1.0265	1.22375	1.26693
SNX16	1.0079	0.764067	1.36525	1.23297
SNX17	0.912633	0.995277	1.02715	1.21251
SNX21	0.298673	0.31969	0.417035	0.431416
SNX25	0.97282	0.90034	1.20498	1.19479
SNX3	0.974857	0.984	1.18171	1.25029
SNX7	1.07385	1.0041	1.25744	1.2759
SNX9	0.927083	0.844792	1.12917	1.19375
SOCS6	0.79798	0.958586	1.18081	0.978788
SOGA1	1.11123	1.03448	1.24249	1.28699
SOGA2	0.993363	0.852876	1.09513	1.02987
SORBS3	1.01206	0.992325	1.23575	1.33333
SORL1	0.982213	0.963439	1.24012	1.18972
SORT1	0.882273	0.952639	2.24493	2.61299
SOX13	0.974937	1.21554	1.58897	1.47744
SOX9	1.05498	0.836197	1.35395	1.14089
SP140L	0.944088	0.995417	1.0165	1.25115
SPAG1	1.0288	1.00785	1.81675	1.85602
SPAG9	1.01488	0.919235	1.15515	1.15622
SPATS2L	1.02311	1.0292	1.20073	1.24453
SPC25	1.0329	1	1.25424	1.18046
SPDL1	1.03996	0.835853	1.4406	1.21058
SPECC1	0.993191	0.856031	1.04864	1.18385
SPECC1L	0.989831	0.938983	1.31412	1.30169
SPINT1	0.977477	0.971847	1.11824	1.14189
SPOP	0.974625	0.95271	1.30334	1.06344
SPPL2A	0.969634	0.946597	1.29529	1.35183
SPRED1	1.55127	1.00221	1.84564	1.2602
SPTAN1	1.07742	0.756129	1.73806	1.2929
SPTBN1	1.03239	0.821127	1.76479	1.4507
SPTLC1	0.91221	0.889001	1.04642	1.03027
SPTLC2	0.936428	0.9889	1.1332	1.21695
SQSTM1	1.06127	1.01348	1.64951	1.42279
SRGAP1	1.02161	1.0036	1.40456	1.57983
SRPK2	1.00872	0.965104	1.19847	1.19738
SSH2	1.00096	0.933908	1.22414	1.13889
SSH3	1.02508	0.868606	1.22066	1.19358
SSR3	0.991898	0.939815	1.07407	1.24306
STARD13	1.41527	1.29008	2.19237	1.98015
STAT1	1.03487	0.967179	1.13949	1.20205
STAU2	0.935818	0.956522	1.12215	1.36232
STBD1	0.962477	1.0075	1.09193	1.21764
STIM1	1.05612	1.03827	1.71556	1.85969
STK17A	1.02692	0.889744	1.59872	1.68974
STK33	1.03452	0.950837	1.12762	1.2113
STK38	0.973841	0.984542	1.23781	1.26278
STK4	0.936585	0.903415	1.08098	1.13854
STRIP1	0.955645	1	1.0756	1.24899
STRN	1.03379	0.991552	1.16473	1.21859
STX12	0.9869	1.00873	1.03821	1.37336
STX16-NPEPL1	0.971079	0.968854	1.25362	1.47608
STX3	0.961818	1.14545	1.07091	1.45364
STX4	1.02863	1.04075	1.0815	1.5011
STX7	0.942472	1.08813	1.21297	1.68299
STXBP1	0.9859	0.970716	1.12798	1.2462
STXBP2	0.972171	0.939703	1.10204	1.14286
STXBP3	1.00704	1.03924	1.14688	1.3159
STXBP5	1.1454	1.15638	1.6118	1.19753
STYX	0.958613	1.19128	1.32662	1.17562
SUFU	1.14533	1.048	1.51867	1.33067
SUGP2	0.989201	1.00108	1.11447	1.30562
SULT1A1	0.959913	0.956663	1.41603	1.49187
SUMF1	0.901179	0.995467	1.04805	1.28558
SUMF2	0.900648	1.10799	1.02268	1.40713
SUN2	0.993197	0.839002	1.21542	1.14286
SUSD2	1.02554	0.787819	2.74656	2.80354
SVIL	1.07665	0.947305	1.42635	1.48144
SVIP	0.93822	1.10995	1.14764	1.70681
SWAP70	1.01218	1.04097	1.15504	1.30565
SYNE3	1.00559	0.928671	1.94825	1.9021
SYNE4	0.886364	1.16883	1.22294	1.22727
SYNGR1	0.989853	0.983089	1.28861	1.44307
SYNGR3	1.27957	0.990591	1.64516	1.74059
SYNJ1	1.14183	1.07332	1.2476	1.30288
SYPL1	0.980431	0.848337	1.18885	0.991194
SYT1	0.926674	0.963868	1.11052	1.43252
SYVN1	0.981701	1.04629	1.18837	1.34553
TACC1	1.05047	0.93796	1.31441	1.21556
TACSTD2	0.105151	0.16828	0.147366	0.200039
TAGLN2	0.977987	1.03564	1.41405	1.51782
TANC1	1.06956	0.987457	1.2634	1.38883
TANC2	1.01741	0.917301	1.16322	1.10229
TAOK1	0.979263	0.982719	1.16935	1.29378
TAP2	1.01133	0.873326	1.13182	1.12976
TBC1D10A	1.02623	1.03497	1.1847	1.35082
TBC1D13	0.979145	0.839416	1.32325	1.19291
TBC1D17	0.996036	0.943508	1.1328	1.27156
TBC1D2	0.998893	0.990033	1.3732	1.52713
TBC1D4	0.99789	0.898734	1.13819	1.25633
TBC1D5	1.0567	1.03918	1.21134	1.30722
TBCEL	1.02147	1.07566	1.28732	1.3456
TBCK	1.03879	0.784483	1.16164	1.00647
TCIRG1	1.00104	0.942827	1.32952	1.17983
TDRD7	0.900935	0.916822	1.10093	1.28318
TES	1.03876	1.02769	1.31894	1.58915
TEX264	0.89614	0.975184	1.01195	1.15257
TGFB1I1	1.00416	0.848821	1.82663	1.59223
TGFBRAP1	0.925738	0.967447	1.10682	1.28688
TGM2	1.00802	0.593583	4.04813	3.49733
TGOLN2	0.920411	1.10398	1.7792	1.64698
THBS1	1.21032	0.992258	2.08903	1.87871
TIAM1	0.914286	0.863736	1.27692	1.30989
TIMP2	1.21061	0.764431	1.35257	1.31669
TINF2	1.04918	1.01991	1.29742	1.226
TK1	0.978558	1.03899	1.14425	1.25439
TM4SF18	0.857658	0.944144	2.8955	2.78018
TMCO1	1.02985	0.970149	1.14286	1.15778
TMED1	0.979757	0.865385	1.05567	1.09312
TMED10	0.918164	0.937126	1.06986	1.1517
TMED3	0.9752	0.8272	1.1112	1.0168
TMED5	1.02691	0.910314	1.13341	1.22982
TMED9	1.02426	0.984177	1.17827	1.26266
TMEM131	0.884735	0.916926	1.05296	1.09553
TMEM147	0.771501	0.892917	0.989882	0.951939
TMEM173	1.06088	0.804391	1.12475	1.24651
TMEM2	0.979275	0.80829	1.67746	1.75777
TMEM245	0.983051	0.948156	1.19043	1.25224
TMEM43	0.992179	1.04134	1.1743	1.42458
TMEM50B	1.03187	0.985714	1.24396	1.37802
TMEM51	1.35625	1.35156	1.625	2.125
TMEM55A	0.961832	0.962786	1.12405	1.21565
TMEM55B	0.962389	0.86615	1.13938	1.47456
TMEM57	0.952328	0.954545	1.05876	1.21286
TMEM65	1.01515	1.09596	1.2	1.56667
TMEM87A	0.937198	0.998068	1.10145	1.21159
TMOD1	1.21238	1.22937	1.74757	1.42354
TMOD3	1.11716	0.878726	1.37205	1.10483
TNFAIP2	1.04583	1.02604	1.39687	1.53021
TNFRSF12A	1.06574	1.00126	1.20607	1.34008
TNFRSF18	1.52941	1.08349	2.52372	1.52182
TNIK	0.946492	1.1308	1.36266	1.62663
TNS1	1.16026	0.965385	1.33718	1.36026
TNS3	1.06428	1.00494	1.7157	2.27689
TNS4	1.06213	0.818399	1.46595	1.32975
TOB2	0.792706	0.742802	0.75144	1.04894
TOM1L2	0.943719	0.99196	1.81106	1.79397
TOR1B	0.921466	1.02513	1.16859	1.09529
TOR4A	0.791498	0.787449	1.05668	1.04858
TP53I3	1.02299	0.988506	1.23254	1.28736
TPM4	1.18138	0.774472	1.37716	0.887716
TPRG1L	0.894691	0.955614	1.03742	1.1201
TPRN	1.05444	1.03556	1.21	1.21778
TPX2	0.984898	1.05933	1.10356	1.33441
TRADD	1.06541	1.13636	1.22395	1.3714
TRAM1	0.987052	0.908367	1.30976	1.13645
TRAM2	0.954175	0.866599	1.27088	1.25051
TRAPPC1	0.958027	0.865687	1.02204	1.08709
TRAPPC10	1.02786	1.09391	1.12797	1.39835
TRAPPC6B	0.924976	0.847104	1.15195	0.969611
TRDMT1	0.507056	0.97379	1.23891	1.11593
TRIM2	1.05065	1.01531	1.99764	2.18963
TRIM21	1.03027	1.01855	1.37012	1.46484
TRIM24	0.982383	1.05078	1.13368	1.2601
TRIM36	1.00948	0.953555	1.10332	1.23791
TRIM38	0.988656	0.998255	1.15707	1.30105
TRIM44	1.04853	0.790698	1.30435	1.11021
TRIM47	0.997685	0.915509	1.34144	1.4213
TRIM68	0.90519	1.20659	1.25749	1.40519
TRIO	1.04246	0.949045	1.19958	1.16242
TRIP12	0.87078	1.18393	0.989523	1.45751
TRIP6	1.00844	0.973629	1.13397	1.15928
TRMT11	0.910872	0.86288	1.12243	1.12047
TRMT2B	0.468261	0.934048	0.806265	0.924155
TSC2	0.976507	0.971399	1.06742	1.21655
TSPAN13	0.997925	1.2583	1.11618	1.73133
TSPYL1	1.59618	1.55485	1.96979	2.03498
TSTD2	0.984026	1.877	2.93131	1.94888
TTC17	1.02987	1.00721	1.1895	1.20906
TTC7A	1.129	1.00457	1.23402	1.54452
TTC9C	0.975401	0.913369	1.05348	1.20107
TTYH3	0.940092	0.866359	1.0682	1.06912
TUBA1C	0.992016	0.929142	1.21557	1.12375
TUBB2A	1.00256	0.969309	1.86445	2.04092
TUBB2B	0.981006	0.922905	1.51508	1.11061
TUFT1	0.860312	0.761709	1.04108	0.95152
TXNL1	1.07212	0.872982	1.36168	1.02691
TYMP	0.979042	0.892216	1.28743	1.2016
TYW3	0.985741	0.797529	0.920152	1.15589
UAP1	1.02179	0.938462	1.39744	1.33974
UAP1L1	0.956697	0.881168	1.29909	1.2719
UBASH3B	1.05657	0.929664	1.72018	1.77829
UBE2A	1.03366	0.84582	1.22584	0.950054
UBE2C	1.07606	0.829978	1.26622	1.15548
UBE2H	1.1561	0.798122	1.42958	0.949531
UBE2J1	0.955789	0.968421	1.12	1.34
UBE2Z	1.01597	1.03493	1.14471	1.21956
UBFD1	0.950932	0.893032	1.08636	1.0422
UBL5	0.936059	1.16247	1.14885	1.51468
UBR1	0.96712	0.914966	1.14966	1.21655
UBR3	1.00107	0.833691	1.16738	1.20386
UBR4	1.04779	1.01399	1.27972	1.27389
UBTD1	1.05105	0.81687	1.29856	1.24417
UBXN2B	0.907707	0.961941	1.05328	1.45766
UFM1	0.885045	1.07589	0.996652	1.30915
UGCG	1.00645	0.825046	1.14549	1.02578
UGDH	0.974798	0.920363	1.15222	1.08669
UGGT2	0.96648	0.950838	1.11844	1.17765
ULBP2	0.904661	0.833686	1.08792	1.20763
UNC13D	1.37129	1.0066	2.69307	2.18647
USP32	0.980912	0.978791	1.09862	1.23754
USP40	0.848087	1.15956	1.67432	1.53224
USP42	1.01805	0.863057	1.49788	0.875796
USP47	1.01591	0.854719	1.25345	1.20148
USP8	1.03232	0.949495	1.11717	1.18182
USP9X	0.990731	0.963955	1.10505	1.15654
UTRN	1.01578	0.944773	1.23866	1.286
VAMP3	1.02476	1.11302	1.16362	1.68353
VAMP4	1.11877	1.1341	1.47254	1.33333
VAMP7	0.961369	1.02539	1.10927	1.18985
VAMP8	1.03491	1.18694	1.09009	1.68356
VANGL1	0.992949	0.994125	1.3678	1.3255
VASP	0.953777	0.958286	1.28523	1.26381
VCAN	1.08226	0.888175	1.41388	1.10154
VCL	0.989817	0.96334	1.20468	1.10591
VCPIP1	0.960039	0.937622	1.09552	1.12476
VEZT	1.03707	1.0039	1.05268	1.31122
VIMP	1.0072	1.16086	1.47059	1.70708
VPS13B	1.02459	0.989461	1.22717	1.28571
VPS13C	0.977648	0.964043	1.21769	1.44995
VPS25	0.978417	0.974306	1.13052	1.12847
VPS26A	0.970677	0.975733	1.08392	1.18301
VPS45	0.958932	0.950719	1.14887	1.23614
VTI1B	1.03975	1.13808	1.21548	1.43305
WASF2	1.01631	1.03874	1.15189	1.26911
WASH6P	0.858833	0.792054	1.08622	1.02705
WDFY3	1.01272	0.942197	1.21618	1.37688
WDR1	1.04767	1.01192	1.23727	1.29361
WDR13	0.921301	1.03358	1.06925	1.21301
WDR25	1.22576	1.22576	1.37482	1.58466
WDR37	0.928881	0.941891	1.17693	1.2281
WDR41	1.04659	1.02955	1.24773	1.20227
WDR44	1.03936	0.957447	1.20745	1.14787
WDR62	0.889381	0.855088	1.24004	1.31416
WFS1	1.01153	1.00419	1.14675	1.19811
WIPF2	1.00121	1.11942	1.12545	1.55127
WIPI1	0.927918	0.776888	1.2643	1.81693
XIAP	1.084	1.0647	1.24745	1.24177
XYLT2	0.784739	0.788755	0.947791	0.981526
YIF1B	0.908681	0.879369	1.02593	1.03269
YLPM1	0.963974	1.00655	1.2238	1.16157
ZBTB10	0.954904	0.976325	1.10936	1.21533
ZBTB43	0.738114	0.738114	1.19984	1.02579
ZC3H7A	1.06459	1.07382	1.19262	1.34717
ZDHHC20	1.04642	1.04391	1.3074	1.50565
ZDHHC5	0.879753	0.849949	1.1295	1.14183
ZER1	0.960646	0.949546	1.13421	1.26741
ZFAND3	0.88308	0.85076	1.14924	1.12072
ZFPL1	0.94693	0.972945	1.16857	1.26431
ZFR	0.972382	1.0748	1.08285	1.33487
ZFYVE16	1.05281	0.879775	1.46742	1.26854
ZFYVE21	0.937063	0.925075	1.44256	1.77423
ZFYVE26	1.19189	1.1239	1.39364	1.31908
ZKSCAN4	0.753599	0.467401	1.01185	0.653683
ZNF12	0.691406	0.701823	0.934896	0.757161
ZNF185	1.08129	0.864516	1.72258	1.60516
ZNF318	0.853748	0.804388	0.983547	0.958867
ZNF385B	0.923077	1.10794	1.06203	1.3598
ZNF444	0.899422	0.975723	1.16763	1.12254
ZNF460	0.959577	1.11838	1.35322	1.42926
ZNF503	0.84027	1.30146	1.16423	1.49944
ZNFX1	1.02236	0.99148	1.19489	1.26944
ZSCAN21	0.548187	0.637489	0.85588	0.639257
ZSWIM7	0.828426	0.876142	1.00609	1.33401
ZWILCH	0.945382	0.938431	1.07249	1.13108
ZWINT	1.02289	0.83975	1.23725	1.0385
ZYX	1.01708	0.922551	1.28929	1.1549
