# Supplementary material for: PUMILIO Proteins in Colorectal Cancer: Tumor Growth Promoting Function and Potential as Therapeutic Targets
Source: Research Square preprint supplement (doi:10.21203/rs.3.rs-199046/v1), 2021-02-11
Supplement: Supplementary file 8 [file 07f2ebd66c6ee48be3e107c1.xlsx]

## Sheet: Summary statisttics
Summary statistics for PUM1 PAR-CLIPs in HCT116 cell lines
PAR-CLIP	Total reads	Reads with adapters	Reads aligned	% aligned	Total clusters
WT-1	40094127	39483055	25291681	0.640571	2267
WT-2	43931229	42947075	26269901	0.611681	2006
Pum1KO-1	69003385	65809471	38907754	0.591218	2293
Pum1KO-2	43055881	41752116	27053519	0.647956	2138

## Sheet: WT-1_PAR-CLIP
Chromosome	Strand	ClusterStart	ClusterEnd	ClusterID	ClusterSequence	ReadCount	ConversionLocationCount	ConversionEventCount	NonConversionEventCount
chr1	+	629222	629254	G1.1	CACTCTCCCCTGAACTCTACACAACATATTTTG	21	2	2	208
chr1	+	629313	629345	G2.1	ATTCCGCTACGACCAACTCATACACCTCCTATG	58	3	3	426
chr1	+	629640	629700	G3.1	ATTAATCCCCTGGCCCAACCCGTCATCTACTCTACCATCTTTGCAGGCACACTCATCACAG	69	5	9	684
chr1	+	629836	629883	G4.1	CATCCATAATCCTTCTAATAGCTATCCTCTTCAACAATATACTCTCCG	148	4	11	1391
chr1	+	630283	630310	G6.1	CATTCCTACTACTCAACTTAAACTCCAG	49	3	7	385
chr1	+	631071	631119	G9.1	CTGATGTTCGCCGACCGTTGACTATTCTCTACAAACCACAAAGACATTG	117	4	11	952
chr1	+	631982	632023	G15.1	CATATTTCACCTCCGCTACCATAATCATCGCTATCCCCACCG	19	2	3	141
chr1	+	632027	632070	G15.2	TCAAAGTATTTAGCTGACTCGCCACACTCCACGGAAGCAATATG	94	5	7	423
chr1	+	632237	632261	G17.1	CCATCATAGGAGGCTTCATTCACTG	22	2	3	151
chr1	+	632947	632976	G20.1	TCTGAACTATCCTGCCCGCCATCATCCTAG	20	3	3	143
chr1	+	633786	633817	G24.1	ATCCCCACCTCCAAATATCTCATCAACAACCG	69	2	4	410
chr1	+	633934	634002	G25.1	CCACAACTAACCTCCTCGGACTCCTGCCTCACTCATTTACACCAACCACCCAACTATCTATAAACCTAG	86	5	8	645
chr1	+	634761	634781	G31.1	TCCCACTCCTAAACACATCCG	79	3	4	312
chr1	+	634885	634905	G33.1	TCTCTATTTTACCCTCCTACA	9	2	2	79
chr1	+	1167160	1167181	G36.1	TAATACTGCCTGGTAATGATGA	101	2	3	704
chr1	+	1167916	1167937	G37.1	TAACACTGTCTGGTAACGATGT	125	2	4	868
chr1	+	1169055	1169076	G38.1	TAATACTGTCTGGTAAAACCGT	46	2	4	312
chr1	+	2309446	2309477	G43.1	TTCACCTGTAAATACTTTTTCCTTTTTCACCG	64	8	44	894	SKI
chr1	+	2309544	2309565	G44.1	TTTTCTGGGCTGTTTTTAACTG	14	2	16	152	SKI
chr1	+	11022938	11022962	G49.1	TTTCTCCTGTAATATTTTATCCCTG	10	2	10	120	TARDBP
chr1	+	11908223	11908272	G52.1	TGTGAGTCTGAAACCAATTTTTTGAGGCCTTGCGTTTCTTAGCAGGGCTT	59	2	2	805
chr1	+	12416692	12416728	G66.1	ATCAGTGGATTTTCTTGGCAATCCTATGGGGCTTTTG	11	2	3	162	VPS13D
chr1	+	16872601	16872620	G77.1	CTAGGATTCGGCGCTTTCAC	27	2	2	118	BX284668.2
chr1	+	25816203	25816234	G95.1	TTCCTGGCCATACCCCGGACTGCCCTCCTGTG	13	2	2	102	SELENON
chr1	+	26281067	26281096	G98.1	CTCTTCGTGGAGGCTGTGGAACAAAACACG	33	3	17	181	SH3BGRL3
chr1	+	26863856	26863872	G106.1	ACAGCACCCTCATCATG	7	2	4	17	SFN
chr1	+	28508646	28508682	G119.1	TCCCTTTCCACAACGTTGAAGATGAAGCTGGGCCTCG	36	2	2	314
chr1	+	28508723	28508762	G120.1	TGGACAATGACTGGGGAGACAAACCATGCAGGAAACATAT	76	2	3	451
chr1	+	28648606	28648641	G123.1	GGCTTCTGTCGTGAGTGGCACACGTAGGGCAACTCG	107	4	11	733	AL360012.1
chr1	+	28648642	28648670	G124.1	ATTGCTCTGCGTGCGGAATCGACATCAAG	37	2	7	220	AL360012.1
chr1	+	28648673	28648719	G125.1	ATTTCGGAAGCATAATTTTTTGGTATTTGGGCAGCTGGTGATCGTTG	357	11	60	5066	AL360012.1
chr1	+	29259959	29259987	G128.1	CCGCGCCGAGCAGGACCTGTACCGCTGTG	17	2	10	39	PTPRU
chr1	+	32157363	32157402	G136.1	AGAGATGGTGGAGATGCTCTTTTCTGATGATTCTGACCTG	14	2	15	181	KPNA6
chr1	+	32228777	32228817	G140.1	TCCTGTCAACTCAGCTGCCCTCTCCCCCAACTATGACCATG	14	2	3	109	EIF3I
chr1	+	35907059	35907089	G149.1	AACACCTACTCAGGGCTGCAGCTCATTATTG	10	2	2	78	AGO1
chr1	+	36180586	36180619	G150.1	AATACTGTAAATAGCTTGTGCTCAGACTCCTCTG	13	3	13	130	MAP7D1
chr1	+	38710647	38710693	G156.1	AATCAGATTGGAGATAAAGAAAAGCTGGGAGGTAAACTTTCCTCTGA	21	5	9	184
chr1	+	40060147	40060171	G162.1	ATTGGGGGAGACGTGCAGAAACATG	26	2	2	102	CAP1
chr1	+	42842862	42842897	G169.1	AGCCTCCACGGTGTGTGGGGATTTTCCTGGACTATG	12	2	3	129	ERMAP
chr1	+	44767250	44767280	G191.1	TACCTGGTGGGTCTAGGCAGGGTCTGAGCTG	20	2	2	154	KIF2C
chr1	+	44775866	44775888	G192.1	TGTATGATGACAACTCGGTAATG	146	3	6	1015
chr1	+	44776493	44776532	G195.1	TAGGGTGATGAAAAAGAATCCTTAGGCGTGGTTGTGGCCG	49	3	3	400
chr1	+	44776546	44776591	G196.1	TGTGCCACTTGCCAATGCAAGGACTTGTCATAGTTACACTGACTGT	1396	11	66	14222
chr1	+	44777624	44777666	G198.1	TAAAACAAGGATCATCGATGTTGTCTACAATGCATCTAATAAC	10	2	2	118	RPS8
chr1	+	44777842	44777890	G199.1	TTCTCGTGATGAAAACTCTGTCCAGTTCTGCTACTGAAGGGAGAGAGAT	632	13	44	7275
chr1	+	44778390	44778429	G200.1	TCTCAGTGATGAAAACTTTGTCCAGTTCTGCTACTGACAG	547	12	34	6397
chr1	+	44778430	44778456	G201.1	TAAGTGAAGATAAAGTGTGTCTGAGGA	729	7	19	5077
chr1	+	69503248	69503283	G213.1	CCAGGTGGCTGTAGTTCCTAGCTACTCAGGAGCCTA	10	2	12	78
chr1	+	75787072	75787149	G217.1	GGTCAATGATGAGTTGGCATGTATTCTGAATCTAAAGTTGATTATTACTACTTTAGCTCTAGAATTACTCTGAGACCT	395	15	25	5185
chr1	+	75787889	75787970	G218.1	GGTCAATGATGTGTTGGCATGTATTATCTGAATCTATTGCTGATGTGTAATAACACTTTAGCTCTAGAATTACTCTGAGACC	546	18	65	7231
chr1	+	92837331	92837378	G230.1	TCCTTTGGTTGCATATGATGCGATAATTGTTTCAAGACGGGACTGATG	157	4	13	1164
chr1	+	92840720	92840746	G231.1	TGCAAACTCGATCACTAGCTCTGCGTG	160	4	15	1101
chr1	+	96447621	96447667	G237.1	CTCTGGACTGCATCCTACCACCAACTCGTCCAACTGACAAGCCCTTG	16	2	2	106
chr1	+	99740797	99740814	G238.1	TTGGTTAAGTGGGAAACG	26	2	25	104
chr1	+	109100557	109100575	G246.1	ATAGACGAGGCCGGGCTTG	25	2	2	70	AL356488.2
chr1	+	109100576	109100623	G246.2	TCCCCGGCCACTGATTATCGAGGCGATTCTGATCTGGGCACGGCCACC	460	9	31	4330	AL356488.2
chr1	+	110054542	110054567	G252.1	CCTGTAAATATCTATATATAATTCTG	18	4	19	179	STRIP1
chr1	+	112649421	112649441	G254.1	TTCGGCTACTACTTAATAATG	11	2	4	78	CAPZA1
chr1	+	114536443	114536480	G256.1	AAAAGTGTGACGAGAACATCCTGTGGCTGGACTACAAG	14	2	4	84
chr1	+	116384029	116384056	G260.1	TATGAGCCTGCAGCTGTTTCAGAACAAG	26	2	3	132	ATP1A1
chr1	+	116387367	116387410	G261.1	AATGGATCAAGTTTTGTCGGCAGCTCTTTGGGGGGTTCTCAATG	31	2	3	355	ATP1A1
chr1	+	116392903	116392939	G267.1	AGCTGTGCTGTGGTTCCGTGAAGGAGATGAGAGAAAG	51	2	2	299	ATP1A1
chr1	+	116398672	116398714	G272.1	AAGAAAGCAGACATTGGGGTTGCTATGGGGATTGCTGGCTCAG	14	3	4	120	ATP1A1
chr1	+	116404445	116404487	G273.1	CCCCCCGTCCTGCACGCCGTGGAGCATCAGGCCACACACTCTG	10	2	2	54	ATP1A1
chr1	+	117523095	117523120	G279.1	TTCAACTTGTAGATACATCAACTTTG	35	3	37	302	MAN1A2
chr1	+	146035715	146035747	G283.1	ATTCGGCGCTCTCACCGCCGCGGCCCGGGTTCG	36	2	2	144	AL592295.3
chr1	+	146037083	146037116	G284.1	CATAGCTGCCTTCCAAGCAGTTGACCCGGGTTCG	21	3	9	128	AL592295.3
chr1	+	146038041	146038079	G285.1	CTCGCCGTGATCGTATAGTGGTTAGTACTCTGCGTTGTG	360	11	118	4263
chr1	+	146039431	146039457	G286.1	ACTCTTAATCTCAGGGTCGTGGGTTCG	33	2	2	283
chr1	+	147073225	147073260	G288.1	GCCGTGATCGTATAGTGGTTAGTACTCTGCGTTGTG	408	12	132	4818
chr1	+	148281365	148281400	G291.1	GCCGTGATCGTATAGTGGTTAGTACTCTGCGTTGTG	428	10	136	5064
chr1	+	148328830	148328847	G292.1	TAAGCACTCTGGACTCTG	17	2	2	83
chr1	+	148981605	148981638	G293.1	ATCTCACTGTACATACATATCAATCCCTAAATTG	14	3	15	139	PDE4DIP
chr1	+	149832807	149832841	G294.1	TGGCGGCGTTAAGCGGATCTCTGGCCTCATTTACG	23	2	6	172	HIST2H4A
chr1	+	149851554	149851585	G299.1	GGGCACCTGTGAACTCAAAAGGCTCTTTTCAG	10	2	6	67	HIST2H2AA4
chr1	+	153645301	153645328	G310.1	TTAGTCAACACATCTGTAAATAACCTTG	19	2	16	116	CHTOP
chr1	+	155727630	155727663	G325.1	TCGGGATCTTCTGCAGTCCAGCTACAACAAACAG	10	2	5	65	DAP3
chr1	+	156115010	156115044	G329.1	AGAAGGAGGACCTGCAGGAGCTCAATGATCGCTTG	27	2	2	118	LMNA
chr1	+	156137205	156137227	G345.1	TACGGCTCTCATCAACTCCACTG	46	2	2	274	LMNA
chr1	+	161443304	161443336	G352.1	GCATGGGTGGTTCAGTGGTAGAATTCTCGCCTG	210	9	32	2054
chr1	+	161450677	161450709	G353.1	GCATGGGTGGTTCAGTGGTAGAATTCTCGCCTG	196	10	25	1927
chr1	+	161458108	161458140	G354.1	GCATGGGTGGTTCAGTGGTAGAATTCTCGCCTG	186	9	23	1828
chr1	+	161465468	161465500	G355.1	GCATGGGTGGTTCAGTGGTAGAATTCTCGCCTG	201	8	29	1967
chr1	+	167006052	167006078	G361.1	CCTGGGAATACTGGGTGCTGTAGGCTT	528	6	13	4162	MAEL
chr1	+	173488281	173488306	G370.1	TTCAACTTCCTCTGTAAATATCCAAG	77	5	69	607	PRDX6
chr1	+	174526964	174526987	G371.1	TTTTATATATCTCACTTACTACTG	24	2	25	263	RABGAP1L
chr1	+	180114842	180114862	G373.1	ATAAAATCTGTAAATAAACTG	20	3	21	99	CEP350
chr1	+	181090689	181090717	G380.1	TTTTGTAGATATGGTGACTCCAGTCTTTG	15	3	13	158	IER5
chr1	+	183232238	183232269	G388.1	GCTCAGGGTGGTGATGGAGTAGTACCTGATAC	15	2	7	107	LAMC2
chr1	+	186398958	186398987	G391.1	TAAAGAGGGATATATTGAACACAGTTGCTG	10	2	2	78	C1orf27
chr1	+	193086211	193086240	G393.1	TCTGAGGATTTCTGTACATATTTTCTTCTG	12	5	12	154	TROVE2
chr1	+	193091511	193091540	G394.1	TTTTCACTGTAAATAATACAACTAACAATG	59	6	61	528	TROVE2
chr1	+	194189116	194189155	G395.1	AAAGGGCTCCTTCAAGTATGCCTGGGTCTTGGATAAACTG	11	2	2	113
chr1	+	194189728	194189766	G396.1	GTGGTATTGGTACTGTTCCTGTTGGCCGAGTGGAGACTG	15	5	7	130
chr1	+	203853946	203853983	G402.1	ATTCCAGGTCCCTTTTGTATATATTCTTTATTCTTTTG	10	2	10	192	ZC3H11A
chr1	+	204554579	204554600	G403.1	TTACTTGGCTGGAATTTATCAG	10	2	11	79	MDM4
chr1	+	212361577	212361612	G408.1	GATGGAGGCTTTGAGTCCCACAGTGTGGTGATACAG	16	2	2	142	PPP2R5A
chr1	+	223747088	223747132	G415.1	AAGAAGCCCCCTCCCAACCTGTTCAAGATCATCCAGAAAGCTCTG	18	2	3	89	CAPN2
chr1	+	223752810	223752843	G416.1	ACTTCCTGAGGCACTATTCCCGCCTGGAGATCTG	45	2	2	378	CAPN2
chr1	+	227561271	227561301	G427.1	ACCGCCTGGGAATAACGGGTGCTGTAGGCTT	90	4	4	618
chr1	+	228097592	228097623	G429.1	CCTGATCTTCGTGGTGGACAGCAATGACAGAG	27	2	5	158	ARF1
chr1	+	231024082	231024114	G440.1	TTTTTCAATGTACATAGTTCAACTCTTTCTTTG	10	4	12	158
chr1	+	237603033	237603071	G446.1	ACATGATGTGATTTCTGCCCAGTGCTCTGAATGTCAAAG	85	4	16	902	RYR2
chr1	+	237603092	237603135	G447.1	CGGGTAAACGGCGGGAGTAACTATGACTCTCTTAAGGTAGCCAA	4456	9	128	30221	RYR2
chr1	+	237603227	237603302	G448.1	AACGGGCTTGGTGGAATCCGCGGGGAAAGAAGACCCTGTTGAGCTTGACTCTAGTCTGGCACGGTGAAGAGCCATG	2080	12	107	15577	RYR2
chr1	+	237927031	237927079	G450.1	AAGTACCCCATTGAGCATGGCATCGTCACCAACTGGGACGACATGGAGA	55	6	9	354
chr1	-	629535	629556	G454.1	ATAGGTGGCACGGAGAATTTTG	38	3	3	221	AL669831.3
chr1	-	630929	630953	G457.1	CAGCTTCAAACCTGCCGGGGCTTCT	23	2	15	108	AL669831.3
chr1	-	1339753	1339783	G472.1	CAATGACGATGCCGTGCGGGTGCTGCGGGAG	7	2	2	29	DVL1
chr1	-	1752208	1752232	G479.1	TTTAAATCCTGTATATACTTTTTAG	16	2	17	191	NADK
chr1	-	1786615	1786664	G481.1	CAAAACATGCTGAGGGCTTTGTTCATCTGGTCATCGTGTCCAAATTTCAG	13	2	2	140	GNB1
chr1	-	1789170	1789208	G482.1	ACCTTCGTGCTGACCAGGAGCTCATGACTTACTCCCATG	15	2	3	127	GNB1
chr1	-	8015308	8015352	G492.1	CCTACAGTCTGAACTCTTCTGCTCAGGAGCGCCTAATACCACTTG	12	2	16	108	ERRFI1
chr1	-	8861121	8861179	G495.1	CCCTGTTGGCAGCTCTAGCTTTGCAGTCGTGTAATTGGCCCAAGTCATTGTTTTTCTCG	41	3	3	448	ENO1
chr1	-	8863247	8863290	G498.1	GGGAGACTGAAGATACCTTCATCGCTGACCTGGTTGTGGGGCTG	64	3	5	407	ENO1
chr1	-	8863908	8863972	G499.1	CCAAGGCCGTGAACGAGAAGTCCTGCAACTGCCTCCTGCTCAAAGTCAACCAGATTGGCTCCGTG	139	3	3	491	ENO1
chr1	-	8865354	8865390	G501.1	TCTGGGAAGTATGACCTGGACTTCAAGTCTCCCGATG	39	2	2	227	ENO1
chr1	-	8865410	8865437	G501.2	ATAAGGTGGTCATCGGCATGGACGTAGC	83	3	7	372	ENO1
chr1	-	8866460	8866491	G504.1	TCATCAATGGCGGTTCTCATGCTGGCAACAAG	51	2	2	370	ENO1
chr1	-	8867137	8867178	G505.1	TCCCCCTGTACCGCCACATCGCTGACTTGGCTGGCAACTCTG	121	6	14	1051	ENO1
chr1	-	8868007	8868041	G506.1	AACAAGAGAAGATTGACAAACTGATGATCGAGATG	33	2	3	62	ENO1
chr1	-	8871915	8871946	G507.1	TATCTATGAGGCCCTAGAGCTCCGGGACAATG	100	2	5	625	ENO1
chr1	-	8874842	8874864	G508.1	CGGGAATCCCACTGTTGAGGTTG	17	2	2	100	ENO1
chr1	-	16198109	16198136	G532.1	TCTTGTCTGTAAATAAACTCCTATCATG	22	4	24	167	ARHGEF19
chr1	-	16199187	16199233	G534.1	TTAGGACATACAAGGCACTGCACCCAGATGAGCTGACCTTGGAGAAG	18	2	18	120	ARHGEF19
chr1	-	19114824	19114853	G548.1	CTGTGCAGTGGATCCCATTGAGAATGAAGA	32	3	10	207	UBR4
chr1	-	20656101	20656122	G564.1	GTAGCTGCCAGCTCCGACATTG	15	2	16	59	DDOST
chr1	-	26949608	26949635	G586.1	TTAAGGAGTTGGTTCTGGTTCTTGGCTG	18	3	4	212	KDF1
chr1	-	27916105	27916143	G589.1	ACGCGATGCGATTTCTGCCCAGTGCTCTGAATGTCAAAG	67	3	5	562
chr1	-	28032083	28032104	G591.1	TCCTGGGCTGTAGTGCGCTATG	64	2	7	438
chr1	-	28578752	28578794	G593.1	TGGACATCCATGGATGAGAAATGCGGATATGGGACTGAGACCA	258	3	3	1553
chr1	-	28579764	28579794	G594.1	TATATGGCATGTGGGCTAGTTTCAGACAGGT	230	6	19	1715
chr1	-	28580434	28580472	G597.1	ATCTCCAACTGCATGCAAGAGCAACCTGGAAAGACTTTG	50	3	3	241
chr1	-	28580487	28580512	G597.2	CAGCATGTTTCCAAGGGCTGTGGCTG	136	5	19	933
chr1	-	29121105	29121135	G598.1	CCCCCACCCTGGGGTCCACGGACGCAGACTG	18	2	2	52	TMEM200B
chr1	-	29148294	29148318	G599.1	CTGTACATTTTTAACTCCCCTAATG	31	4	31	275	SRSF4
chr1	-	30932286	30932305	G603.1	TCTAATCTGTATCTATAATG	13	3	10	105	PUM1
chr1	-	30933252	30933282	G604.1	CTGGAGAAGTACTACATGAAGAACGGTGTTG	14	2	2	95	PUM1
chr1	-	30968165	30968234	G609.1	TGGCAAGGATGATACACACTTGCCCTCACTTAGACTATAGTTCACTGATGAGAGCATTGTTCTGAGCCAG	353	8	35	2476	PUM1
chr1	-	31907025	31907057	G613.1	CAAATCTGTAGATTCTCTCCTCTCCCATCCCAG	20	2	10	190	PTP4A2
chr1	-	32366414	32366458	G614.1	CTCACACCTGGGAAGGGGCTCTCTAAATCCCGGCCAGAAACTCTG	11	3	13	75	BSDC1
chr1	-	39567374	39567400	G643.1	GCCTGTCTCTACAGCTCTGCCACATTT	29	2	3	258
chr1	-	42926196	42926239	G652.1	TATATCTGGACAAGCCAACTTGTAAATACACCACCTCACTCCTG	55	3	57	352	SLC2A1
chr1	-	42927158	42927211	G655.1	TTCACTGTGCTCCTGGTTCTGTTCTTCATCTTCACCTACTTCAAAGTTCCTGAG	32	3	6	281	SLC2A1
chr1	-	45511255	45511284	G670.1	AACAAAACCTCTTCTGTATTTTTTTTTTCC	23	3	8	161	PRDX1
chr1	-	45514562	45514600	G671.1	CAGATCACTGTAAATGACCTCCCTGTTGGCCGCTCTGTG	50	2	6	348	PRDX1
chr1	-	45514932	45514979	G673.1	AAACAAGGAGGACTGGGACCCATGAACATTCCTTTGGTATCAGACCCG	103	4	11	802	PRDX1
chr1	-	45655226	45655242	G677.1	ACATAATTCCTCTGATG	16	2	16	80	GPBP1L1
chr1	-	54871400	54871436	G695.1	AACCACTTCGTGGAAGGGCTGCTCTACTCCCTGGATG	11	2	2	76	DHCR24
chr1	-	67426191	67426221	G701.1	AAGACCAGAAAGGCGACCACCTCGTGAACGA	43	2	2	84	SERBP1
chr1	-	71065103	71065127	G703.1	TCATCATCTGGATCATCCCATTCTG	14	2	2	124	ZRANB2
chr1	-	71067680	71067702	G704.1	CAAAGAATTCTCCTTTTGGGCTT	15	3	3	125
chr1	-	84647027	84647049	G709.1	TATACTGTAGATTTTTAACAAAG	10	2	10	80	SSX2IP
chr1	-	91387224	91387449	G711.1	GTACGAATACAGACCGTGAAAGCGGGGCCTCACGATCCTTCTGACCTTTTGGGTTTTAAGCAGGAGGTGTCAGAAAAGTTACCACAGGGATAACTGGCTTGTGGCGGCCAAGCGTTCATAGCGACGTCGCTTTTTGATCCTTCGATGTCGGCTCTTCCTATCATTGTGAAGCAGAATTCACCAAGCGTTGGATTGTTCACCCACTAATAGGGAACGTGAGCTGGAG	655163	59	12630	5416943	HFM1
chr1	-	91387538	91387592	G711.2	TTCCGGGGACAGTGCCAGGTGGGGAGTTTGACTGGGGCTGTACACCTGTCAAACG	2071	10	149	10172	HFM1
chr1	-	92228768	92228791	G713.1	TTTAATACCCTGTACATATCTTTG	19	3	6	201
chr1	-	112912491	112912531	G727.1	AAAACTGTAAATATTTTTTTAACCTAATATCACTTAAATCG	25	6	29	369	SLC16A1
chr1	-	116514545	116514577	G731.1	ATGTAGATACTTTTGTAAATAAATGTAAATATG	31	6	32	362	CD58
chr1	-	119913454	119913473	G734.1	CATTTTGTAGATATTAACAG	13	3	15	89	NOTCH2
chr1	-	119914766	119914792	G735.1	TTATAGGGCAAGACCTTTGTGCTTTTG	15	2	2	163	NOTCH2
chr1	-	119923732	119923755	G737.1	CGGGACTCCCAGGGGGAACTCATG	13	2	2	37	NOTCH2
chr1	-	143699468	143699513	G741.1	TGGGAAACTCGACTGCGTAATTTGTGGTAGTGGGGGACTGCGTTCG	47	7	12	488
chr1	-	145465629	145465670	G743.1	AAACTTGACTGCATAATTTGTGGTAGTGGGGGACTGCGTTCG	70	3	4	896
chr1	-	145465713	145465739	G744.1	TTTTCCCTGGGCGAGGCTTATCCATTG	17	2	3	152
chr1	-	145925773	145925793	G746.1	TTTATATTTAATCTCTTACCG	12	2	3	129	RBM8A
chr1	-	148038765	148038810	G748.1	TGGGAAACTCGACTGCATAATTTGTGGTAGTGGGGGACTGCGTCCG	258	7	9	2862
chr1	-	148265105	148265134	G749.1	ATCCGAGTTCGAGTCTCGGTGGAACCTTTG	10	2	20	66
chr1	-	148302770	148302806	G751.1	CGCCGTGATCGTATAGTGGTTAGTACTCTGCGTTGTG	1031	11	113	12404	LINC01138
chr1	-	151983280	151983314	G776.1	ACCCTCTGGCTGTGGACAAAATAATGAAGGACCTG	17	2	4	80	S100A10
chr1	-	153534609	153534637	G779.1	GTGGGTAATTGTACAATAAATTTTTTTTG	15	4	10	170	S100A6
chr1	-	153534713	153534748	G780.1	TCACCTTCCTGGGGGCCTTGGCTTTGATCTACAATG	149	11	23	1736	S100A6
chr1	-	154965640	154965668	G801.1	GCACTGCTGCAGCTCAATGGGGACTTCCT	35	2	3	214	SHC1
chr1	-	155925958	155925989	G806.1	TATCACAGGGCTGACTGTACTACCCAACACTC	50	2	4	324
chr1	-	156310585	156310625	G817.1	ACATGAAGGAACTGGGCATATGGGAGCCATTGGCTGTGAAG	29	2	3	175	CCT3
chr1	-	156317452	156317487	G821.1	TACATCCAGCAGCTCTGTGAGGACATTATCCAACTG	15	2	5	130	CCT3
chr1	-	156318883	156318924	G822.1	AACCCTCGCATTGTGCTGCTGGATTCTTCTCTGGAATACAAG	52	4	6	486	CCT3
chr1	-	160292146	160292172	G839.1	TACCAGCTGTGGGCCTGAAGCTTAATG	21	2	2	100	COPA
chr1	-	160323431	160323451	G840.1	TGAAGATCTGGCGCATGAATG	17	3	3	82	COPA
chr1	-	161447244	161447276	G844.1	ATTCGGCGCTCTCACCGCCGCGGCCCGGGTTCG	93	2	2	370	AL592295.3
chr1	-	161454982	161455015	G847.1	CATAGCTGCCTTCCAAGCAGTTGACCCGGGTTCG	43	3	3	286	AL592295.3
chr1	-	161462392	161462420	G849.1	CTGCCTTCCAAGCAGTTGACCCGGGTTCG	40	2	9	252	AL592295.3
chr1	-	161523885	161523916	G852.1	CATTGGTGGTTCAGTGGTAGAATTCTCGCCTG	262	7	24	2858	VAC14
chr1	-	173864150	173864219	G859.1	AATACATGATGATCTCAATCCAACTTGAACTCTCTCACTGATTACTTGATGACAATAAAATATCTGATAT	266	11	24	3482
chr1	-	173864368	173864438	G860.1	GATGTAATGATTCTGCCAAATGAAATATAATGATATCACTGTAAAACCGTTCCATTTTGATTCTGAGGTTA	197	8	21	2002
chr1	-	173864824	173864877	G861.1	ACTAACGCTGATGAGCAATATTAAGTCTTTCGCTCCTATCTGATGTATCTGGCG	626	13	68	7291
chr1	-	173865351	173865379	G862.1	AAAATGGAGATTAATCTTAAACTGAAACA	272	5	8	1890
chr1	-	173865380	173865429	G863.1	TGTTAGTGATGATTTTAAAATTAAAGCAGATGGGAATCTCTCTGAGAAAG	140	7	22	1098
chr1	-	173865624	173865685	G864.1	TGTAATGATGTTGATCAAATGTCTGACCTGAAATGAGCATGTAGACAAAGGTAACACTGAAG	921	7	27	5289	GAS5
chr1	-	173865965	173866028	G865.1	CCTGGATGATGATAAGCAAATGCTGACTGAACATGAAGGTCTTAATTAGCTCTAACTGACTAAA	13645	17	718	106797
chr1	-	173866634	173866677	G867.1	CTAGAATGATGAGGATCTTAACCACCATTATCTTAACTGAGGCA	681	11	46	7673
chr1	-	173866680	173866713	G867.2	CCACAATGATGACAGTTTATTTGCTACTCTTGAG	69	5	6	809
chr1	-	173867675	173867724	G869.1	TTGGTAGGGACATCTGAGAGTAATGATGAATGCCAACCGCTCTGATGGTG	1580	9	95	10843	GAS5
chr1	-	197199979	197200001	G878.1	TTTTAGAGGCTGCAAAATTTTTG	13	2	2	128	ZBTB41
chr1	-	203903612	203903655	G890.1	TCATGTAAATAATTTCCATATTTCTCTTTTATAATAAACTAATG	15	5	7	257
chr1	-	204403398	204403441	G891.1	TGTATATAACATAACTAATCTGTAAATTGTAATAAATATATTTG	13	3	12	164	PPP1R15B
chr1	-	204562411	204562442	G893.1	ACCGCCTGGGAATACCTGGTGCTGTAGGCTTT	206	3	4	1743
chr1	-	209649990	209650029	G900.1	TTTCTCCGAGCTTCATCTACCTGTGGACTGACCAAGCCTG	19	2	2	173	LAMB3
chr1	-	217609895	217609929	G907.1	AAACTACTGTAAATTATATATTTTTCTCTTTTATG	16	4	18	270	GPATCH2
chr1	-	223864606	223864647	G911.1	TACCCCATCGAGCACGGCATCGTCACCAACTGGGACGACATG	40	2	3	182
chr1	-	226145194	226145214	G915.1	TTTTGTACATATCTAACTCTG	27	4	21	246	ACBD3
chr1	-	228628146	228628225	G929.1	ATCTCGGAAGCTAAGCAGGGTCGGGCCTGGTTAGTACTTGGACGGGAGACCGCCTGGGAATACCGGGTGCTGTAGGCTTT	286	9	11	2349
chr1	-	229432574	229432607	G931.1	TACGTGGCCATCCAGGCCGTGCTGTCCCTCTACG	55	2	2	418	ACTA1
chr1	-	229705168	229705205	G932.1	CATTTAACCCCCCTGTACACAACTCACTCCTTTTAAAG	11	2	4	117	THSD4-AS1
chr1	-	235111080	235111102	G936.1	TCACTACTCTGTAAATTAATCCG	36	2	37	250	TOMM20
chr1	-	244858147	244858186	G949.1	CTGGACGGCCACTGTTCCCGCATGTTCTCTGCCACAACTG	36	2	3	341	HNRNPU
chr1	-	244864200	244864221	G952.1	TCTCAAGGCCGAGCTCATGGAG	6	2	3	17	HNRNPU
chr10	+	3107226	3107250	G962.1	AAAAAAAGGCTGAATATTATTATTG	13	2	11	91	PFKP
chr10	+	3129867	3129895	G966.1	TTCATCATCGAGACCATGGGCGGCTACTG	13	2	2	82	PFKP
chr10	+	5457547	5457587	G970.1	TTTTTCACTGTACATTCCTCATTTTACATTCATTTAACCTG	13	7	15	245	NET1
chr10	+	23137424	23137461	G974.1	ACTGGGTCTGGCCCTTAACTTCTCTGTGTTCTATTATG	22	5	16	274
chr10	+	27186713	27186753	G976.1	TAATTTATCTTAACCTCAAAACTGTATATAAATCTTCAAAG	31	5	27	433	MASTL
chr10	+	27538088	27538123	G977.1	ATAGTGACATCTTTCTGTATATAAACTCTTTAACTG	29	4	29	355	RAB18
chr10	+	27539188	27539213	G978.1	TATATTGTAGATTTTTTTCATTCATG	21	3	20	256	RAB18
chr10	+	28619800	28619813	G980.1	ATTTCTTGTAGATG	15	2	5	100	WAC
chr10	+	52316988	52317035	G986.1	ATTGCAGTAAATTACTGTATTGTAAATTCTCAGTGTGGCACTTACCTG	85	6	81	1041	DKK1
chr10	+	62806288	62806312	G987.1	TTTTTTAACTTATTGACTGTGCATG	13	4	16	153	ADO
chr10	+	67764585	67764605	G988.1	GAAGCGGGTGCTCTTATTTTT	522	7	76	3910
chr10	+	80518219	80518247	G1011.1	TCTTTATGTGGGAGTGGTGACTCTGAAAG	15	2	4	146	TSPAN14
chr10	+	86970520	86970551	G1014.1	ACTGCTAACCAGGCCTCTGACACCTTCTCTGG	34	2	2	233	ADIRF
chr10	+	100356684	100356713	G1026.1	CTGCCCACCTCTTCGGATATCGTCCTTATG	30	2	2	267	SCD
chr10	+	100963597	100963626	G1031.1	TAATTTAATCCTTTGTAGATACATTATTTG	10	2	9	138	SLF2
chr10	+	101007740	101007801	G1032.1	TTTATGGCCTCGTTTTCACTTGTATATTTTTCACACTGTAAATTTCTTGTACAAACCCAAAG	142	9	135	2081	LZTS2
chr10	+	102137851	102137886	G1034.1	TGCTGCTGCATGAGGAGGCGGGTGATTCTGGCTTTG	9	2	2	87	PPRC1
chr10	+	102140669	102140712	G1037.1	ACCATCATCCCTGAAGTCAAAGAGGTTGTGGATTCTCTGAAAAT	14	2	3	130	PPRC1
chr10	+	102359286	102359326	G1040.1	AAAAGTCCCAGTCAGCATCTGTGGAGTCCATCCCTGAAGTG	33	2	3	260	GBF1
chr10	+	112950493	112950528	G1059.1	CACATTGATCGGATCCTTGGGAACGAGAGAAAAAAG	10	2	4	56	TCF7L2
chr10	+	119677449	119677483	G1067.1	CTTTTCTTCTATATTCTTACTCTGTACAAATAAAG	10	4	14	142	BAG3
chr10	+	120900111	120900136	G1069.1	ACAGTATTCTTTGGACATTTCTCATG	20	2	3	217	WDR11
chr10	+	123165294	123165335	G1072.1	TTTGAGCTCTTTTTGTAATATACTCTAAACCTGTTATTTCTG	196	12	181	2205	BUB3
chr10	-	411403	411427	G1075.1	AATAAACTTGTAAAACATCATTCTG	10	2	12	68	DIP2C
chr10	-	28874391	28874414	G1086.1	GAAATACTGGGTGCTGTAGGCTTG	28	2	9	181
chr10	-	29458057	29458086	G1087.1	TATTTTGTAAATGTTCAAGGGAACTGTTTG	11	2	13	130	SVIL
chr10	-	43387503	43387537	G1100.1	AGGACTCCCATTTGGATGCACAAAGGAAGAAATTG	10	2	2	58	HNRNPF
chr10	-	49703073	49703129	G1105.1	AAGACCTTGTTGAGCTTGACTCTAGTCTGGCATGGTGAAGAGACACGAGAGGTGTAG	2061	3	96	4459
chr10	-	49703310	49703338	G1106.1	ATTTCTGCCCAGTGCTCTGAATGCCAAAG	343	5	7	2650
chr10	-	59791429	59791450	G1108.1	ACATTGTAGATATTTAATATTG	11	2	11	99	CCDC6
chr10	-	60293471	60293488	G1109.1	ATGATACGGTGACCACTG	12	2	24	24	ANK3
chr10	-	67045469	67045492	G1110.1	CGATCTATTGAAAGTCAGCCCTCG	2119	4	10	12684	CTNNA3
chr10	-	67045539	67045578	G1111.1	TTCGTGGGGAACCTGGCGCTAAACCATTCGTAGACTATCT	29870	10	322	157986	CTNNA3
chr10	-	70123410	70123458	G1112.1	CTAGTAGTGGGGATAGACCTGAAGAACCAGATGGTGCTGCTGCAGGGTG	26	3	11	130	AIFM2
chr10	-	71816707	71816737	G1114.1	AATGTAACCTGCTAGCTCTCCGAAGGCCCTG	12	2	2	82	PSAP
chr10	-	71828028	71828057	G1120.1	TCAAGGAGGAGTGTGACCGCCTGGGCCCTG	27	2	2	127	PSAP
chr10	-	86435442	86435486	G1137.1	TAACCTTTTTTCCATTGTAAATATTTCTGTAAATACTACCAATTG	21	6	27	296	WAPL
chr10	-	93374844	93374879	G1146.1	TCTCTCTCCCAAATACATGAGGCGGCTGTGAGGATG	31	2	3	188	MYOF
chr10	-	100239053	100239087	G1165.1	AATTTAGTCAGCAGCTTAAGGCTTAGGAACATTAG	14	2	2	138	CWF19L1
chr10	-	101781556	101781584	G1167.1	TTTCAACAATTGTAAATATTTCTTCCTTG	22	4	25	283	NPM3
chr10	-	101785773	101785805	G1168.1	ACAAACTTGTAAATTTCTTTGTATATAAACTAG	11	2	11	108	MGEA5
chr10	-	102488188	102488236	G1170.1	CATGGCATCGTCAAGGATTGGAACGACATGGAACGCATTTGGCAATATG	37	2	2	298	ACTR1A
chr10	-	113703684	113703743	G1179.1	ACCTGCTTCTGGGTTGGGGTTTCGTATGTAGCAGAGCAGCTCCCTCACTGCGATCTATTG	112	5	68	965
chr10	-	119036067	119036106	G1181.1	ATAGGGAATCTCTCCGTCGTACTAAAAATGAGACTGATGA	41	5	8	273	EIF3A
chr11	+	809993	810035	G1217.1	TCGCACGCGTGAGACTTCTCCGCCGCCTCCGCCGCAGACGCCG	17	2	2	87	RPLP2
chr11	+	810310	810355	G1218.1	ATCTTGGACAGCGTGGGTATCGAGGCGGACGACGACCGGCTCAACA	87	2	4	422	RPLP2
chr11	+	836255	836298	G1223.1	CTGGCCTGGCTGTCATGGCAGTGGGCATCTGGACGCTGGCCCTC	12	3	6	94	CD151
chr11	+	838695	838726	G1227.1	CCACGTGGTCACTGTGCACTGCCCTGTTCATG	35	4	4	277	CD151
chr11	+	8685488	8685515	G1246.1	AGTACTCGAAGAGAATCTACTGGTCTTG	693	7	32	5462
chr11	+	9428792	9428823	G1249.1	TTTCATCTGTGTCTGGTAGCAGTGTCTGTCTG	20	2	2	238
chr11	+	9428891	9428912	G1250.1	TACTGGTCTAGTGTTGTCTCTG	16	2	6	154
chr11	+	34097215	34097241	G1269.1	CCCTTCATTCTCTAACACTCCAAACAG	38	3	10	256	CAPRIN1
chr11	+	45882302	45882326	G1288.1	TGTGTGGCTATGAGGCTGATTCCTG	13	2	2	115	CRY2
chr11	+	57809336	57809384	G1296.1	AATTTCTCTGAGGACACTGTCATCTCTATTTTGAACACTATCAACGAGG	12	2	9	141	CTNND1
chr11	+	62885486	62885530	G1319.1	ACTTCCTTCTTGCCGGCTCAACTTCTCCGACTCTACCAGCTGATG	22	5	5	238	SLC3A2
chr11	+	62888499	62888544	G1321.1	CTTAACTTTGGGGATGTGGGCCTCTCGGCTGGACTGCAGGCCTCCG	48	2	3	432	SLC3A2
chr11	+	65423646	65423679	G1355.1	ACTTTTCTCTAGGTTTGGCGCTAAACTCTTCTTG	15	2	14	193	NEAT1
chr11	+	65499636	65499677	G1357.1	TTGGAGAAGATAGAAGTTTGAAGTGGAAAACTGGAAGACAGA	45	2	2	238	MALAT1
chr11	+	65863460	65863489	G1367.1	AGTACAGGGTGCTGTTGTGTGTGGACATTG	12	2	2	118	MUS81
chr11	+	66063662	66063707	G1375.1	CCTGCTGGAATGGAGACCCCTGAACTCATTGAGCTGAGGAAGAAGA	49	2	3	354	SF3B2
chr11	+	69651812	69651856	G1402.1	CTGTAGTGGGGTTCTAGGCATCTCTGTACTTTGCTTGCTCATATG	22	4	12	270	CCND1
chr11	+	75400391	75400429	G1413.1	CTTCGATGAAGAGATGATGACGAGTCTGACTTGGGGATG	81	7	19	750	RPS3
chr11	+	75400704	75400726	G1415.1	ATGGCATCTTCAAAGCTGAACTG	12	2	3	60	RPS3
chr11	+	75401647	75401689	G1416.1	AATGTTCTTGGTGAGAAGGGCCGGCGGATTCGGGAACTGACTG	23	3	3	145	RPS3
chr11	+	77886444	77886559	G1428.1	GCGGGTGTTGATGCCATGTGATTTCTGCCCAGTGCTCTGAATGTCAAAGTGAAGAAATTCAATGAAGCACGGGTAAACGGCGGGAGTAACTATGACTCTCTTAAGGTAGCCAAATG	5184	18	247	36254	AAMDC
chr11	+	77886648	77886707	G1430.1	AATGGGCTTGGCGGAATCAGCAGGGAAAGAAGACCCTGTTGAGCTTGACTCTAGTCTGGC	1889	9	176	12642	AAMDC
chr11	+	85484052	85484136	G1436.1	AGACCGATAGTCAACAAGTACCGTAAGGGAAAGTTGAAAAGAACTTTGAAGAGAGAGTACAAGAGGGCGTGAAACCGTTAAGAGG	8454	10	131	41752
chr11	+	93721784	93721866	G1440.1	CCTAATCATTTCTGGGCAATGATGAAAAGGTTTTACTACTGATCTTTGTAACTATGATGGTTTCTACACTTGACCTGAGCTCA	40	3	5	446
chr11	+	102231386	102231418	G1442.1	TTCTTACTTACAAGACTTGCTCCTACTTCTATG	18	3	4	248	YAP1
chr11	+	109603197	109603233	G1445.1	GGCCGTGATCGTATAGTGGTTAGTACTCTGTGTTGTG	36	5	42	431
chr11	+	118581315	118581362	G1453.1	ACCCGAACTCGGATTGAGGGCTTATTAGCAGCTTTTCCAAAGCTCATG	11	2	2	141	ARCN1
chr11	+	118602156	118602175	G1455.1	ATATGTACATATTACTCACG	19	2	19	114	ARCN1
chr11	+	119023537	119023582	G1458.1	ATTCCTGAGCCTTAACACTGTGCTCTTTCCTTCTGTATATACCATG	27	2	28	311	TRAPPC4
chr11	+	119023584	119023617	G1459.1	TCTTACTTTCCAACTCTGTACAGATTTATTTATG	12	2	3	159	TRAPPC4
chr11	+	119335858	119335890	G1461.1	CATCCGGACTTCACCCTGAGGCTGGCTACCCAG	7	2	2	40	RNF26
chr11	+	120478174	120478214	G1465.1	AATCTACCTTAATATCGTCAAAACCTCAGTCTCATTCACTG	16	2	2	206	ARHGEF12
chr11	+	123301498	123301527	G1467.1	CAACACCCTGATTGCTCCTATCTGATTCTT	750	8	32	6748
chr11	+	125584626	125584652	G1472.1	TCAAAATACCTGTACAATTTTAAAATG	16	5	16	128	EI24
chr11	+	125604207	125604238	G1473.1	ATATATCTCCCGATCTGTGGCTGGCTCCTATG	18	2	10	188	STT3A
chr11	+	130109511	130109540	G1477.1	TGAACATTCAGACTGGGAAATGGGAACCTG	14	2	6	61	APLP2
chr11	+	130144629	130144653	G1482.1	GTGTATTTTTATTTTCCTGTGACTG	28	5	29	352	APLP2
chr11	-	5505530	5505575	G1505.1	TGGAACTGTAAGTCCGGTAAACCTCTTTCTTTTATAAATTGCCCAG	11	2	2	174	HBG2
chr11	-	6448819	6448867	G1506.1	CACTTTATTTATTCGGTTCTTGCTTTGGTGACTGGGTGAGCCTGGACTG	16	4	20	300	TRIM3
chr11	-	10508751	10508776	G1510.1	TAAATTTAACTGTTAGTCCAAAGAGG	64	3	3	509	DHFR
chr11	-	10509344	10509416	G1513.1	TAGAGTGCTTAGTTGAACAGGGCCCTGAAGCGCGTACACACCGCCCGTCACCCTCCTCAAGTATACTTCAAAG	5276	10	74	29517
chr11	-	10509499	10509538	G1514.1	ACGTTAGGTCAAGGTGTAGCCCATGAGGTGGCAAGAAATG	218	3	3	1511
chr11	-	10509607	10509711	G1515.1	AGCCACAGCTTAAAACTCAAAGGACCTGGCGGTGCTTCATATCCCTCTAGAGGAGCCTGTTCTGTAATCGATAAACCCCGATCAACCTCACCACCTCTTGCTCAG	1377	13	28	11669
chr11	-	10510172	10510208	G1516.1	ATAGGTTTGGTCCTAGCCTTTCTATTAGCTCTTAGTA	153	5	5	2231
chr11	-	10801468	10801507	G1520.1	TCCAGCGTCCTGTGAGCGAAGATTATGAGATATGAGGGCA	131	5	9	851
chr11	-	10801558	10801607	G1521.1	TGCCCGATGATTATAAAAAGACGCGTTATTAAGAGGACTTTATGCTGGAG	38	2	5	390
chr11	-	17074652	17074684	G1529.1	TTGGCCAGTTCTTCCTTGGATGTCTGAGTGAGC	39	3	24	416	RPS13
chr11	-	17075778	17075826	G1531.1	AAAGGTTTTCCTTAGTGTTGGGTAAACCTTCCTTGGATGTCTGAGTGAG	33	3	9	401
chr11	-	21000879	21000910	G1534.1	ACCTCCTGGGAATACCGGGTGCTGTAGGCTGT	6799	7	317	39864
chr11	-	27889413	27889455	G1537.1	TACTGTGTCCAACAGCTGAAGGAATTTGAGGGGAAGACTTTAG	27	2	2	191
chr11	-	27890199	27890252	G1542.1	TTGGTTCTGATGAGGAAGAAGAAAAGAAGGATGGTGACAAGAAGAAGAAGAAGA	156	5	11	519
chr11	-	27890854	27890896	G1545.1	AGAGCTCATTTCAAATTCATCAGATGCATTGGACAAAATCTGG	15	2	13	147
chr11	-	46385275	46385315	G1550.1	CCCTACAACGTCATGGTCCTGGTGAACACCTTCTGCCAGAG	10	3	4	86	CHRM4
chr11	-	46762457	46762496	G1553.1	GAGAGTGATGAGTTGCACACTGGTGGAGCCATGGTATCAG	146	5	13	1054
chr11	-	57332718	57332749	G1568.1	ACATTCGGATCTACCCCACCTTTCTGCACCTG	17	2	2	143	SSRP1
chr11	-	59626977	59626997	G1576.1	TGGCACACGTAGGGCAACTCG	250	3	5	721
chr11	-	61329503	61329530	G1592.1	TGCCGGATGATTGGCCTGCGTCTCTATG	10	2	2	88	DDB1
chr11	-	61965053	61965099	G1597.1	ATGACTGGGAGAGCGGGCTGAATGCAATGGAGTGTGCATTACATTTG	99	2	4	788	FTH1
chr11	-	61967423	61967465	G1600.1	CAGCCACCGCCGCCGCCGCCGCCTCTCCTTAGTCGCCGCCATG	116	3	3	516	FTH1
chr11	-	62560301	62560331	G1621.1	CTTCCCTGAAGAACTCACTCAGACCTTCATG	21	2	2	151	AP002990.1
chr11	-	62567430	62567453	G1623.1	TTCCGGGCTGTCTTGGGCGAAGTG	56	2	4	341	AP002990.1
chr11	-	62571043	62571083	G1624.1	TGAGGCGAATTCTGGGGCTGCTGGATGCTTACTTGAAGACG	112	4	5	849	AP002990.1
chr11	-	62571862	62571888	G1625.1	AGGGTGATGATGGATTCTGTGTGTTTG	22	2	2	184	AP002990.1
chr11	-	62625260	62625282	G1631.1	AATGGATCAAAGGAGTGAGGTTG	16	2	2	70	GANAB
chr11	-	62629640	62629671	G1636.1	CTGATGGGCTGAGACAGCGCTCTGGGGGCATG	38	2	2	205	GANAB
chr11	-	62631060	62631081	G1639.1	CTGCTGGGGCCCTCCATCTCTG	21	2	2	121	GANAB
chr11	-	62639050	62639092	G1644.1	CTTCAGGGGCTTCAAAAGAACATGACTCGGTTCAGGATTGATG	17	3	4	107	GANAB
chr11	-	62648528	62648557	G1646.1	TCTATACCCGGCCTAGCTGTGGACCTGAGG	16	2	2	110	INTS5
chr11	-	62648587	62648610	G1647.1	ATTGGAACGGAAGCGCTTCCTCTG	14	2	15	69	INTS5
chr11	-	62832922	62832941	G1650.1	CCCACTTTGTAAATAAACTG	22	3	20	112	WDR74
chr11	-	62833639	62833662	G1651.1	TCTCAATTGAACTGCCTCCTCTTG	11	3	6	93	WDR74
chr11	-	62841605	62841643	G1653.1	TACTTCCAGGAACGGTGCACTCTCCCTTCGGGGAGAGAA	58	2	4	336	WDR74
chr11	-	62841679	62841746	G1654.1	ATACGTCCTCTATCCGAGGACAATATATTAAATGGATTTTTGGAAATAGGAGATGGAATAGGAGCTTG	958	17	73	14609	WDR74
chr11	-	62853326	62853377	G1656.1	AATACCGCCCCAGTCTGATCAATGTGTGACTGAAAGGTATTTTCTGAGCTGT	769	13	61	9209
chr11	-	62853666	62853694	G1657.1	ACTTGCTGTTGAGACTCTGAAATCTGATT	817	11	31	8761
chr11	-	62853695	62853732	G1658.1	GTTTGTGATGACTTACATGGAATCTCGTTCGGCTGATG	580	12	48	7724
chr11	-	62853907	62853933	G1659.1	ACAGTGAAAATACATGAACACCTGAGA	513	3	7	1950
chr11	-	62853934	62853968	G1659.2	TTTCTATGATGAATCAAACTAGCTCACTATGACCG	212	6	14	2110
chr11	-	62854621	62854648	G1660.1	TTAATAGCATGTTAGAGTTCTGATGGCA	98	3	8	912
chr11	-	62855292	62855323	G1662.1	ATTAGTGGAGAAAACAGAAAATTCTGAGTAGC	232	5	7	1606
chr11	-	62855325	62855366	G1662.2	CTACGGGGATGATTTTACGAACTGAACTCTCTCTTTCTGATG	355	9	22	3797
chr11	-	62855594	62855631	G1663.1	TTCCTATGATGAGGACCTTTTCACAGACCTGTACTGAG	201	7	16	1810	SNHG1
chr11	-	65540578	65540601	G1676.1	CATGTTGTTCGGGTCGGAGATTTG	27	3	3	240	LTBP3
chr11	-	65854866	65854909	G1685.1	CCGGCTGGTTCCTCTCCCTTTTCCCCTGGTCACGGCTACTCATG	62	5	8	645	CFL1
chr11	-	72018254	72018284	G1709.1	CATGAAACCCTGAAGCAGTGCCAGGACCTGA	38	2	2	135	NUMA1
chr11	-	76235863	76235886	G1714.1	TCTAGGGGTATGATTCTCGGTTTG	21	2	3	203
chr11	-	85958927	85958961	G1720.1	TCTCTTAAATCTCTTAAACTCTCTTCTTCCATTAG	13	2	2	206	PICALM
chr11	-	93730978	93731005	G1725.1	CTAGCAATCAGCTTATTGGGAACAGTTG	221	4	8	1661	TAF1D
chr11	-	93731074	93731101	G1726.1	AATGGTCATTACCAAGGCTTTTAGAATG	147	3	6	1311	TAF1D
chr11	-	93731506	93731572	G1727.1	ATGTTATGATGATGGGCGAAATGTTCAACTGCTCTGAAGGGGCTGAATGAAAATGGCCTTTCTGAAC	825	12	51	6662
chr11	-	93732003	93732024	G1728.1	ACAATGAGACCTGTAACATTTT	40	2	2	244
chr11	-	93733258	93733299	G1731.1	TTCAGATGATGAATTTAACTGTTCAACTGCTGAATGATAACG	182	5	21	1224
chr11	-	93733465	93733497	G1732.1	TTAGATCTGTGGGAAGGAATTACAAGACAGTTG	675	8	30	5632	TAF1D
chr11	-	93733560	93733596	G1734.1	TTGAGGTCTATCCCGATGGGGCTTTTCCTGTAGCCTG	86	5	8	1102
chr11	-	111821441	111821468	G1739.1	AAGACCCTGTCGAGCTTGACTCTAGTCT	135	3	5	804	ALG9
chr11	-	118751356	118751377	G1747.1	TATTTAAAAAAACAATCCCAAG	15	3	9	66	DDX6
chr11	-	119095400	119095417	G1760.1	CTTCACCGGTCTACCTCG	11	2	5	50	H2AFX
chr11	-	122146568	122146589	G1763.1	TGAGGTAGTAGGTTGTATAGTT	101	4	11	877
chr11	-	123057602	123057624	G1765.1	TTACTGGGCATTCTCAATACTTG	31	2	9	270	HSPA8
chr11	-	123058076	123058119	G1767.1	AATTCAAGGTGTTGGCAACTACCTTCCTTGGATGTCTGAGTGAC	455	6	51	4370
chr11	-	123058268	123058328	G1768.1	GCAAGATTAACGATGAGGACAAACAGAAGATTCTGGACAAGTGTAATGAAATTATCAACTG	27	4	5	150	HSPA8
chr11	-	123058908	123058951	G1771.1	AAAGTCTTATGTTGGCCAGTTCCTTCCTTGGATGTTTGAGCGAC	986	13	992	9496	HSPA8
chr11	-	123059172	123059205	G1773.1	CTCTTGGATGTCACTCCTCTTTCCCTTGGTATTG	26	2	4	317	HSPA8
chr11	-	123059334	123059376	G1774.1	CTTGGCTAATGATGGCAACACCTTCCTTGGATGTCTGAGCGAG	1025	10	98	7746	HSPA8
chr11	-	123059377	123059422	G1774.2	TCGCTGTGATGAGTGATTGTTAAACATTCGTAGTTTCCACCAAAAG	94	4	15	1030	HSPA8
chr11	-	123059494	123059538	G1775.1	ACTTCTTCAATGGAAAAGAACTGAATAAGAGCATCAACCCTGATG	21	2	4	166	HSPA8
chr11	-	123059644	123059723	G1776.1	AATCGACTTCTATACCTCCATTACCCGTGCCCGATTTGAAGAACTGAATGCTGACCTGTTCCGTGGCACCCTGGACCCAG	133	5	7	1034	HSPA8
chr11	-	123061142	123061182	G1780.1	AACGGTTGATCGGTGATGCCGCAAAGAATCAAGTTGCAATG	20	2	7	115	HSPA8
chr11	-	123061183	123061223	G1780.2	AAACCGAACCACTCCAAGCTATGTCGCCTTTACGGACACTG	31	3	3	113	HSPA8
chr12	+	4099129	4099165	G1794.1	AACGTATGGTCCAGGAAGCTGAGAAGTACAAAGCTGA	15	2	3	79
chr12	+	6385084	6385113	G1797.1	AATTCCTACAACGAGCACTGGAACTACCTG	16	2	2	94	LTBR
chr12	+	6510222	6510253	G1801.1	GCCACATGATGATATCAAGGCTGTTGTGATTC	24	2	23	145
chr12	+	6528175	6528215	G1806.1	CCACTTTCTGCGACTCCCAGCTTCGTCTTCTGTTCACCATG	45	4	5	554	NCAPD2
chr12	+	6536703	6536765	G1808.1	ATTCCACCCATGGCAAATTCCATGGCACCGTCAAGGCTGAGAACGGGAAGCTTGTCATCAATG	55	4	13	373	GAPDH
chr12	+	6537321	6537370	G1811.1	CACCACCAACTGCTTAGCACCCCTGGCCAAGGTCATCCATGACAACTTTG	20	2	3	131	GAPDH
chr12	+	6537658	6537730	G1812.1	CGGGGCTCTCCAGAACATCATCCCTGCCTCTACTGGCGCTGCCAAGGCTGTGGGCAAGGTCATCCCTGAGCTG	129	5	6	862	GAPDH
chr12	+	6537848	6537890	G1813.1	CAGGCGTCGGAGGGCCCCCTCAAGGGCATCCTGGGCTACACTG	83	3	4	355	GAPDH
chr12	+	6537893	6537971	G1813.2	CACCAGGTGGTCTCCTCTGACTTCAACAGCGACACCCACTCCTCCACCTTTGACGCTGGGGCTGGCATTGCCCTCAACG	66	2	18	444	GAPDH
chr12	+	6538296	6538335	G1815.1	ACCCCTTGAAGAGGGGAGGGGCCTAGGGAGCCGCACCTTG	98	3	6	464	GAPDH
chr12	+	6770596	6770630	G1818.1	CCTCTCCAGACACTGCGCCCTCCACCCTCACTCTG	10	2	3	39	PTMS
chr12	+	6870514	6870545	G1830.1	TATCTTCCTTTACTGTTTATATCTTCACCCTG	25	2	25	375	TPI1
chr12	+	20551433	20551570	G1843.1	ATTGACAGATTGATAGCTCTTTCTCGATTCCGTGGGTGGTGGTGCATGGCCGTTCTTAGTTGGTGGAGCGATTTGTCTGGTTAATTCCGATAACGAACGAGACTCTGGCATGCTAACTAGTTACGCGACCCCCGAGCG	11866	38	703	137975	PDE3A
chr12	+	34203900	34203921	G1846.1	AATGCCGGGTGCTGTAGGCTTT	99	3	4	662
chr12	+	49272322	49272344	G1854.1	TTCACCTCGCTGCTCATGGAACG	8	2	2	40	TUBA1C
chr12	+	49272656	49272694	G1856.1	TGCCCTACCCCCGCATCCACTTCCCTCTGGCCACATATG	18	2	5	121	TUBA1C
chr12	+	49272822	49272856	G1858.1	CTGCCTGTTATACCGTGGTGACGTGGTTCCCAAAG	26	2	3	223	TUBA1C
chr12	+	49273232	49273278	G1862.1	TGTGCTGTACTTTTACACTCCTTTGTCTTGGAACTGTCTTATTTTTG	16	4	15	248	TUBA1C
chr12	+	49330203	49330240	G1863.1	AGTGTGTCCCTCTTAATGGAGGCTCTTCTCTGGATATG	26	2	4	354	TROAP
chr12	+	50456758	50456785	G1872.1	AAGGGTAAGATTATGAGATCTGAGGGCT	139	2	3	952	LARP4
chr12	+	52059240	52059265	G1877.1	CTGTAAATACAGGAAGAAAGAGCTTG	17	3	9	69	NR4A1
chr12	+	52949431	52949458	G1880.1	CCTGAACGACCGCCTGGCCTCTTACCTG	23	2	2	125	KRT18
chr12	+	52950818	52950853	G1882.1	ATGACACCAATATCACACGACTGCAGCTGGAGACAG	239	2	5	1009	KRT18
chr12	+	53479453	53479493	G1896.1	ATTCATCCATAATCCCTTTCTGCTGTTCACCACCACCCATG	17	2	2	215	PCBP2
chr12	+	53479558	53479583	G1897.1	TTTCTACACACTTTATCATCCACTCG	10	2	16	84	PCBP2
chr12	+	54337278	54337299	G1900.1	TCAGTGCATCACAGAACTTTGT	21	2	3	142
chr12	+	62603691	62603712	G1930.1	TGAGGTAGTAGTTTGTGCTGTT	379	10	76	3698
chr12	+	65824872	65824904	G1934.1	CTCCCGGTGCCCGCAACTCCTGATCCCAACCCG	15	2	3	64	HMGA2
chr12	+	68840041	68840085	G1935.1	CTCATCCTTTACACCAACTCCTAATTTTAAATAATTTCTACTCTG	15	2	5	241	MDM2
chr12	+	71924257	71924305	G1936.1	TTTTAATTGTAAGTTGTTAACTCCTGTATATATCATTAAAATAAATCTG	61	7	62	769	TBC1D15
chr12	+	98503503	98503536	G1940.1	TCCTCGTTAGTATAGTGGTTAGTATCCCCGCCTG	18	2	7	209
chr12	+	98598525	98598557	G1946.1	AATACTTATCTCTGGCGCACATCACTATATTTG	25	2	2	250	SLC25A3
chr12	+	98601192	98601223	G1949.1	TTTCTCACCCTGCTGATTCTGTGGTATCTGTG	23	3	3	258	SLC25A3
chr12	+	103943801	103943824	G1958.1	TACGGATGGTCTGGCAACATGGAG	136	2	2	646	HSP90B1
chr12	+	103947655	103947688	G1962.1	AATTGTAAATTATACTCTCACCATTTGGATCCTG	265	7	274	2608	HSP90B1
chr12	+	112267181	112267206	G1980.1	CTCCATGTGCGTCCCTCCCGAAGCTG	21	2	2	124
chr12	+	112267209	112267252	G1981.1	CGCTCGGTCGAAGAGGACGACCATCCCCGATAGAGGAGGACCGG	33	2	2	114
chr12	+	122982498	122982527	G2002.1	AGGAAATCGTAACCAAAGAACGACACAGAG	10	2	7	13	ARL6IP4
chr12	+	123596824	123596845	G2004.1	AACTGTACATTCACAACTTATG	27	2	22	167	TMED2
chr12	+	130875880	130875915	G2012.1	AGGTTGCTCAGACAACTGCTCTCCCGGATGAGGATG	19	2	3	127	RAN
chr12	+	131799651	131799682	G2013.1	TCTCTTACCTGTATATTTGTAAATATATCATG	10	3	11	139	SFSWAP
chr12	+	132714859	132714880	G2020.1	CGAGAACCACTGTCTCTGATCA	14	2	2	43	AC135586.2
chr12	-	6328779	6328804	G2027.1	ACTTTTGTACATACACTAAAATTCTG	56	6	52	485	TNFRSF1A
chr12	-	6587432	6587453	G2038.1	GCAGGGCATGAATGAATATTTG	14	2	3	61	CHD4
chr12	-	6593204	6593224	G2041.1	AGGCATCTGTGAAATTCCATG	26	2	2	154	CHD4
chr12	-	6967336	6967364	G2055.1	CCACCTGAGCGCAACCTTGGATCTGACAG	100	2	3	478
chr12	-	6967550	6967579	G2056.1	ACTCCGTGCTCTCTGGCCCTTGGCTCCTTG	34	3	5	176
chr12	-	9240252	9240285	G2060.1	ACTTAAAGGAGAAGAAGGAAGTTGTGGAAGAGGC	28	2	2	110
chr12	-	21635666	21635703	G2069.1	TATGGCATTGAGAATGAAGTCTTCCTGAGCCTTCCATG	21	2	4	227	LDHB
chr12	-	21642038	21642069	G2071.1	ATTGGAAGTGGATGTAATCTGGATTCTGCTAG	14	2	2	130	LDHB
chr12	-	21654556	21654602	G2073.1	ATCACTGTAGTGGGTGTTGGACAAGTTGGTATGGCGTGTGCTATCAG	34	3	5	387	LDHB
chr12	-	31791709	31791729	G2077.1	TAAATTCTGTAAAATACTTTG	14	5	14	111	H3F3C
chr12	-	31791758	31791787	G2078.1	CTCGCCGGATACGGGGAGAGAGAGCTTAAG	49	2	4	150	H3F3C
chr12	-	34219399	34219426	G2079.1	CAGCTCCCTCGCTGCGATCTATTGAAAG	1196	5	21	8339
chr12	-	34219715	34219735	G2080.1	ATGGTAATCCTGCTCAGTACG	383	3	4	2245
chr12	-	38161462	38161491	G2081.1	CCTGGGAATACCGGGTGCTGTAGGCTTTTG	20	2	3	170
chr12	-	46358296	46358344	G2085.1	GTGTATTAACTTTGTGTATATAGTGTAAATATCCCCACTGTACTGTTAG	47	7	47	606	SLC38A2
chr12	-	46358626	46358683	G2086.1	TTTGGGTCTTGGGTTCAAGTGTATATATTCCTGTAAGTTTCTTAACTGCATTTTGATG	56	8	48	726	SLC38A2
chr12	-	49127802	49127833	G2100.1	TACCTGTAATATTTTTCCATCATATCTCAAAG	229	11	252	2688	TUBA1B
chr12	-	49128491	49128535	G2104.1	TGCCCTACCCCCGCATCCACTTCCCTCTGGCCACATATGCCCCTG	49	2	3	184	TUBA1B
chr12	-	49128570	49128627	G2104.2	CCTTATTAGCCAGATTGTGTCCTCCATCACTGCTTCCCTGAGATTTGATGGAGCCCTG	38	3	7	386	TUBA1B
chr12	-	49131298	49131329	G2109.1	TCGCCTTCGCCTCCTAATCCCTAGCCACTATG	15	2	6	116	TUBA1B
chr12	-	49185387	49185421	G2113.1	CTGCCTGTTGTACCGTGGTGACGTGGTTCCCAAAG	16	2	2	114	TUBA1A
chr12	-	50016643	50016673	G2122.1	CTTGTGCGCCGGGTGGAGATTCTCAGTGAAG	20	2	3	130	RACGAP1
chr12	-	52897338	52897368	G2125.1	AGGCCGCTATGCAGGGTAGCACTGGGAACAG	77	2	2	226	KRT8
chr12	-	52897429	52897471	G2126.1	ATGGGAAGCTGGTGTCTGAGTCCTCTGACGTCCTGCCCAAGTG	149	2	3	1277	KRT8
chr12	-	52899826	52899900	G2129.1	TATGAGGAGCTGCAGAGCCTGGCTGGGAAGCACGGGGATGACCTGCGGCGCACAAAGACTGAGATCTCTGAGATG	180	3	4	811	KRT8
chr12	-	52899907	52899957	G2129.2	TACGAGGATATTGCCAACCGCAGCCGGGCTGAGGCTGAGAGCATGTACCAG	251	6	19	1259	KRT8
chr12	-	52900011	52900047	G2129.3	TCCCAGATCTCGGACACATCTGTGGTGCTGTCCATGG	61	2	6	568	KRT8
chr12	-	52904744	52904785	G2133.1	TTACGGTCAACCAGAGCCTGCTGAGCCCCCTTGTCCTGGAGG	60	4	4	469	KRT8
chr12	-	53543371	53543411	G2138.1	TGAGGAGGTGGGACTCTTCAATGAACTAGCTAGCTCCTTTG	16	2	3	183	AC023509.3
chr12	-	54462119	54462142	G2144.1	TCTGGGGCACAACTCACTACTCTG	15	2	3	87	GTSF1
chr12	-	56276055	56276092	G2150.1	ACTCTAACCTGGACTGGTCTCACAATTTCACCAACATG	26	3	3	257	CS
chr12	-	56643450	56643488	G2161.1	TTGGTGAGAGGACCCGTGAAGGCAATGATTTATACCATG	30	3	8	168	ATP5B
chr12	-	56643714	56643749	G2163.1	CTCACTGATGAGTACGTTCTGACTTTCGTTCTTCTG	72	4	8	925	ATP5B
chr12	-	56644806	56644859	G2165.1	TTGGTCCTGAGACTTTGGGCAGAATCATGAATGTCATTGGAGAACCTATTGATG	55	4	5	533	ATP5B
chr12	-	56645061	56645100	G2167.1	CTTCTATGATGATTTTATCAAAATGACTTTCGTTCTTCTG	109	8	19	2052
chr12	-	56645315	56645353	G2170.1	TCAGGGACTATGCGGCGCAAACATCTCCTTCGCCAAAAG	47	2	2	316	ATP5B
chr12	-	56673009	56673043	G2173.1	TACGATCGAAGGGACTATGTCTTCATTGAATTTTG	27	2	3	270	PTGES3
chr12	-	66123414	66123442	G2180.1	TTAAAAATACTACATTAGGGCTGGGCATG	11	2	2	86	LLPH
chr12	-	76029821	76029844	G2183.1	ATGTACTGTAATTTTATTTTAATG	11	4	10	127	PHLDA1
chr12	-	76059820	76059850	G2192.1	AACCTACGGAAGAAGAATGTGAATGGAAACC	28	2	2	101	NAP1L1
chr12	-	88493985	88494021	G2194.1	AAACTAACCCATACAAAATATCCAACTCTGGATTCTG	22	2	4	164
chr12	-	89350751	89350792	G2198.1	CCCTTCCTCTACTTGGGCTGTGCCAAAGACTCCACCAACTTG	20	2	2	209	DUSP6
chr12	-	97876125	97876160	G2207.1	CTCACTGATTACTTGATGACAATAAAATATCTGATA	18	2	2	190
chr12	-	110429579	110429604	G2221.1	CTTTTGGTTTGGGGGCGCCCTCTCTG	19	2	2	129	AC144548.2
chr12	-	110533279	110533327	G2223.1	AATTATAACTTATGCAGGAATAGTTCTGTAAATACATTTAAATAAACTG	65	7	70	615	PPTC7
chr12	-	120211067	120211089	G2260.1	CTTCTATGGGGCTCTCTCTTCTG	14	2	2	138	PXN
chr12	-	120291760	120291805	G2266.1	AAATATAGTCGGCATTGGCAATTTTTGACAGTCTCTACGGAGACTG	347	12	77	4692
chr12	-	120293090	120293139	G2267.1	CAATATAGTCGGCACTGGCAATTTTTGACAGTCTCTACGGAGACTGAATT	555	13	95	6968
chr12	-	120293140	120293176	G2268.1	TTGAAAACTTTTCCCAATACCCCGCCGTGACGACTTG	168	8	22	1268
chr12	-	124911729	124911818	G2284.1	ATCTTTGCTGGGAAACAGCTGGAAGATGGACGCACCCTGTCTGACTACAACATCCAGAAAGAGTCCACTCTGCACTTGGTCCTGCGCTTG	35	4	9	257	UBC
chr12	-	124912008	124912046	G2285.1	ATCTTTGCTGGGAAACAGCTGGAAGATGGACGCACCCTG	28	2	2	135	UBC
chr12	-	124912214	124912277	G2285.2	TTGATCTTTGCTGGGAAACAGCTGGAAGATGGACGCACCCTGTCTGACTACAACATCCAGAAAG	34	5	5	221	UBC
chr12	-	124912713	124912733	G2287.1	TTGATCTTTGCCGGAAAACAG	14	2	2	44	UBC
chr12	-	127165928	127165991	G2295.1	GCTTCTGGGTCGGGGTTTCGTACGTAGCAGAGCAGCTCCCTCGCTGCGATCTATTGAAAGTCAG	49237	17	832	403222
chr12	-	127165996	127166037	G2295.2	CGCACGTTCGTGGGGAACCTGGCGCTAAACCATTCGTAGACG	50213	8	467	298414
chr12	-	127166065	127166092	G2295.3	TCCTGGGAAACGGGGCGCGGCCGGAAAG	1648	2	6	2966
chr12	-	127166359	127166439	G2296.1	GCTGAGGAGCCAATGGGGCGAAGCTACCATCTGTGGGATTATGACTGAACGCCTCTTAAGTCAGAATCCCGCCCAGGCGGA	567588	12	9616	4890040
chr13	+	27255065	27255096	G2311.1	GCTTAATGATGACTGTTTTTTTTGATTGCTTG	293	13	43	4889
chr13	+	27255097	27255134	G2312.1	AAGCAATGTGAAAAACACATTTCACCGGCTCTGAAAGC	237	4	10	1630
chr13	+	29307622	29307666	G2313.1	TCTCCTCTGACTTCAACAGCGACACCCACTCTTCCACCTTCGACG	11	2	12	85
chr13	+	45002208	45002248	G2318.1	ATCGCTTGAGTCCAGGAGTTCTGGGCTGTAGTGCGCTATGC	46	3	5	485
chr13	+	49110361	49110389	G2320.1	TTGGATTTTCTTGTTCTCTGCTGCTACTG	16	3	5	235	FNDC3A
chr13	+	49209393	49209440	G2322.1	ATTTTACCTCATATACTGTACATTCCAAAAACTCTAAACTTTTTAAAG	41	4	19	612	FNDC3A
chr13	+	81690419	81690466	G2328.1	TTAAACTAAAAAAAAAGGCCGCCGTGACCTATTCACCCTCCACTTCCC	13	4	10	79
chr13	+	97392303	97392324	G2333.1	ATCTGTATAATATTCTAATTTA	25	3	25	250	MBNL2
chr13	+	97985575	97985611	G2335.1	TTTGTGATATTGCGGCAGAACTGGCCAGGAATTTAAT	23	2	20	234	IPO5
chr13	+	99205763	99205810	G2338.1	ATTCGGCTGATCTGGCTGGCTAGGCGGGTGTCCCCTTCCTCCCTCACC	44	7	12	527
chr13	+	112882514	112882549	G2343.1	ATACCATCATCCCTGCGGATGCACCGCCGTACCCTG	21	2	6	141	ATP11A
chr13	+	113263808	113263842	G2345.1	TTTCTGTTACTCTGTGCAAAATAACTTTGAGATTG	23	2	2	330	CUL4A
chr13	+	113323281	113323303	G2350.1	ACATTCGGGGTGATCCTGTTCTG	21	3	7	141	LAMP1
chr13	-	40932236	40932271	G2370.1	ATTACTTTTTCAACTGTAAATAATGTACATTTAATG	17	2	6	253	ELF1
chr13	-	44433565	44433602	G2372.1	TTCTCTACACAATTGTAAGGTGTCACTGTATTTAACTG	24	2	9	223	TSC22D1
chr13	-	44436709	44436730	G2375.1	TTTCTCCCTGGGCTGCGGAAAG	16	2	4	92	TSC22D1
chr13	-	76699677	76699696	G2387.1	ACATGTCTGGAATTCTGAAG	21	2	16	110
chr13	-	95336170	95336199	G2389.1	CTGGTCCGATGGTAGTGGGTTATCAGAACT	27	2	2	208
chr13	-	99215396	99215442	G2395.1	CTGGTGGTGGTGTCATTCCACACATCCACAAATCTCTGATTGGGAAG	25	3	5	270
chr13	-	106492502	106492535	G2397.1	TTCTGTTACCCAGGGCTCTGCAGCACCTCACCTG	10	2	4	62	EFNB2
chr13	-	109424151	109424282	G2401.1	ATACCCCACTATGCTTAGCCCTAAACCTCAACAGTTAAATCAACAAAACTGCTCGCCAGAACACTACGAGCCACAGCTTAAAACTCAAAGGACCTGGCGGTGCTTCATATCCCTCTAGAGGAGCCTGTTCTG	1433	15	44	11984
chr13	-	109424290	109424343	G2401.2	ACTACGAAAGTGGCTTTAACATATCTGAACACACAATAGCTAAGACCCAAACTG	2036	11	44	17411
chr13	-	110893052	110893077	G2403.1	ATGCTTGGAAGACTCAGAAGACTTTG	15	2	2	103	ANKRD10
chr14	+	16055443	16055474	G2405.1	CGGTTCTATTTTGTTGGTTTTCGGAACTGAGG	11	2	2	152
chr14	+	16055636	16055666	G2406.1	TTCCGACCATAAACGATGCCGACTGGCGATG	10	2	2	49
chr14	+	16056025	16056065	G2407.1	TGGCGTTTAGCCACCTGAGATTGAGCAATAACAGGTCTGTG	13	2	14	113
chr14	+	16056345	16056388	G2409.1	CGCTGAGAAGACAGTCGAACTTGACTATCTAGAGGAAGTAAAAG	35	4	8	247	ANKRD30BL
chr14	+	16057546	16057581	G2410.1	CAGGACACATTGATCATCGACACTTGAATGCACTTG	22	3	23	115
chr14	+	20610176	20610196	G2414.1	TCTCTTCGGGGGCGTGGGTTC	38	2	3	262
chr14	+	20625414	20625435	G2415.1	TCTCTTCGGGGGCGTGGGTTCG	52	4	5	352
chr14	+	32485056	32485077	G2430.1	CTTAATTAAAGTGGCTGATTTG	14	2	3	123	AKAP6
chr14	+	47792434	47792452	G2433.1	TGAACTGAAACATCTTAGT	11	2	8	55
chr14	+	49586613	49586699	G2434.1	CTACTCGGGAGGCTGAGGCTGGAGGATCGCTTGAGTCCAGGAGTTCTGGGCTGTAGTGCGCTATGCCGATCGGGTGTCCGCACTAAG	102	8	11	902
chr14	+	58645809	58645847	G2446.1	AAACAGGCGTGTCTGCCCTCTGGCGGGATACCTTCTCTG	10	2	5	95	DACT1
chr14	+	66965285	66965312	G2450.1	CTACATCTCGCCTCTCTACAGCTTCCTG	10	2	4	86	GPHN
chr14	+	67616131	67616167	G2452.1	CATTTAACCCCCCTGTACACAACTCACTCCTTTTAAA	13	3	12	129
chr14	+	71588823	71588852	G2455.1	ATCAGAAGACTCTGTCAGGCCCTGGACATG	10	2	8	52	SIPA1L1
chr14	+	81661735	81661766	G2462.1	CCCCAGGACACAGAGACTTTATCAAAAACATG	26	2	3	126
chr14	+	89712533	89712560	G2463.1	CGACATCTGTCACCCCATTGATCGCCAG	15	2	2	82
chr14	+	89712585	89712621	G2464.1	CTAGGCGGGTGTCCCCTTCCTCCCTCACCGCTCCATG	30	2	4	108
chr14	+	92026597	92026625	G2468.1	AAATCACCACCAAGGACTTAAAGGAGAAG	39	3	5	100
chr14	+	96532607	96532635	G2475.1	CATCAACTCTTGTACATAAATTTTTCTTG	15	3	12	183	PAPOLA
chr14	+	102029641	102029689	G2496.1	CGGAGCGAGCTGGAGGAGCAGCAGATGCACTTGAACGTGGGGCTCAGGA	84	2	6	407	DYNC1H1
chr14	+	102042059	102042102	G2503.1	ATGCCAGTGGACATGTCGAGGACCTTGCAGCCGAGCAGAACACG	30	3	3	149	DYNC1H1
chr14	+	102050682	102050721	G2507.1	AAGCTGAATGGAATCTGACGGTTGGGAGTGGTGGAAATTG	12	2	2	114	DYNC1H1
chr14	-	20326454	20326498	G2519.1	TCCGTGTTTCAGCTGATCAGCCTGATTAAACACATGCTCTGAGCA	47	3	3	334
chr14	-	20343071	20343115	G2520.1	CAGGGGACCTCATAACCCAATTCAGACTACTCTCCTCCGCCCATT	128	2	2	1237
chr14	-	21385552	21385575	G2533.1	TATTTTCATTTACTCTGGCCCTTG	12	2	2	142	CHD8
chr14	-	23062426	23062463	G2547.1	GAAGAGGCCTTCTGGATTGACAAGATCAAATCTCATTG	13	2	14	116	ACIN1
chr14	-	34568698	34568738	G2556.1	ATCTGGACAGAATCGCTGGACAGGTGGCAGTTGCCAACAAG	12	2	21	51
chr14	-	49583625	49583648	G2563.1	ATTATCCGGGGCATCTACTCAATG	106	3	4	738	RPS29
chr14	-	49853797	49853838	G2566.1	TTCTGGGCTGTAGTGCGCTATGCCGATCGGGTGTCCGCACTG	48	5	10	464
chr14	-	49862550	49862598	G2567.1	AATAGCCACTGCACTCCAGCCTGAGCAACATAGCGAGACCCCGTCTCTT	160	2	6	1074
chr14	-	49862703	49862773	G2567.2	TTCTGGGCTGTAGTGCGCTATGCCGATCGGGTGTCCGCACTAAGTTCGGCATCAATATGGTGACCTCCCGG	92	6	7	910
chr14	-	67685242	67685266	G2583.1	TTTTGGGCTATTCTGCAAAATCAAG	12	2	13	95	AL049779.1
chr14	-	75134291	75134316	G2598.1	CTTTGAACTGTAGATAACTCTTAAAG	30	4	21	167	TMED10
chr14	-	77025884	77025929	G2601.1	TCCCCTATGGCCGCTCTCATGTCGGTGGCAGATACTCTGGGCACAG	33	2	2	255	IRF2BPL
chr14	-	81176279	81176311	G2606.1	TAAAATTCATTGCAGATCAAGGTTGCTCTTCTG	17	2	4	200	GTF2A1
chr14	-	81176769	81176801	G2607.1	ATCCATCTTTGTACATTTTCATTTTATTTCATG	13	4	14	220	GTF2A1
chr14	-	89875052	89875088	G2609.1	AGATTGAGCAATAACAGGTCTGTGATGCCCTTAGATG	613	7	14	4525	AL137230.2
chr14	-	102081613	102081642	G2631.1	TTTTTCTTTATTTTTGTTAATATTAAAAAG	9	3	8	141	HSP90AA1
chr14	-	102081647	102081694	G2632.1	ACTTACCTGTTCAGTACTCTACAATTCCTCTGATAATATATTTTCAAG	35	3	15	368	HSP90AA1
chr14	-	102081741	102081776	G2633.1	TAACTGAAGAAATGCCACCCCTTGAAGGAGATGACG	36	2	5	148	HSP90AA1
chr14	-	102082205	102082258	G2634.1	CAAAAGGCAGAGGCTGATAAGAACGACAAGTCTGTGAAGGATCTGGTCATCTTG	33	3	3	210	HSP90AA1
chr14	-	102083052	102083087	G2635.1	TTTGAGAACCTCTGCAAAATCATGAAAGACATATTG	63	2	7	458	HSP90AA1
chr14	-	102083114	102083162	G2635.2	TCAGTCACCAAAGAAGGCCTGGAACTTCCAGAGGATGAAGAAGAGAAAA	117	2	9	524	HSP90AA1
chr14	-	102083180	102083263	G2635.3	AACGTCTTCGGAAACATGGCTTAGAAGTGATCTATATGATTGAGCCCATTGATGAGTACTGTGTCCAACAGCTGAAGGAATTTG	82	3	4	530	HSP90AA1
chr14	-	102083671	102083693	G2636.1	CTTGGAATACACGAAGACTCTCA	684	4	38	2729	HSP90AA1
chr14	-	102083816	102083871	G2637.1	CTTAGAACTCTTTACTGAACTGGCGGAAGATAAAGAGAACTACAAGAAATTCTATG	33	3	6	207	HSP90AA1
chr14	-	102084690	102084752	G2641.1	ATTACTAATGAGGAGTACGGAGAATTCTATAAGAGCTTGACCAATGACTGGGAAGATCACTTG	43	3	5	322	HSP90AA1
chr14	-	102084808	102084876	G2642.1	TTCTGATGAGGAAGAAGAAAAGAAGGATGGTGACAAGAAGAAGAAGAAGAAGATTAAGGAAAAGTACAT	251	4	6	841	HSP90AA1
chr14	-	102084928	102084982	G2642.2	ATAAAGAAGTAAGCGATGATGAGGCTGAAGAAAAGGAAGACAAAGAAGAAGAAAA	377	2	7	925	HSP90AA1
chr14	-	102085337	102085383	G2643.1	ACCAAACTGAGTACTTGGAGGAACGAAGAATAAAGGAGATTGTGAAG	264	3	19	1240	HSP90AA1
chr14	-	102085858	102085912	G2644.1	TGCAGATATCTCTATGATTGGCCAGTTCGGTGTTGGTTTTTATTCTGCTTATTTG	39	3	6	564	HSP90AA1
chr14	-	102086027	102086075	G2645.1	ACTCTGGGAAAGAGCTGCATATTAACCTTATACCGAACAAACAAGATCG	125	4	11	978	HSP90AA1
chr14	-	102086255	102086286	G2647.1	ATTGATCATCAATACTTTCTACTCGAACAAAG	16	2	2	144	HSP90AA1
chr14	-	102086306	102086342	G2648.1	GAGGAGGAGGAGGTTGAGACGTTCGCCTTTCAGGCAG	13	2	7	53	HSP90AA1
chr14	-	105141756	105141794	G2662.1	TAAATGTGTACATATTAAAGGAAGCACTCTGTATATTTG	15	4	8	137	JAG2
chr14	-	105142329	105142362	G2663.1	AATCTTCCTTTTATTCCTCACTCGGGTTTCTCTG	10	2	6	134	JAG2
chr15	+	28315915	28315954	G2668.1	CCGATCACCTCTGAGACCCACCTTGCTCATAAACAAAATG	20	3	5	139
chr15	+	34495750	34495785	G2672.1	CGGCGACACTCCTGTGGACTTCTTCTTCGAGTTCTG	11	2	2	124
chr15	+	34496167	34496198	G2673.1	CCACGGGGCGAGTCTGGCACCTCTTTCTTCTG	10	2	4	86
chr15	+	34943079	34943113	G2675.1	CATGGTTAACGTCCCTAAAACCCGCCGGACTTTCT	12	2	2	97
chr15	+	40394215	40394250	G2678.1	TCTACTTTTAAAATAAATACTTCTGTAAATATTCTG	10	2	9	151	KNSTRN
chr15	+	43766811	43766843	G2686.1	AACTTTCTGATTTTGGCTTGGAGAGCACTGCTG	14	2	2	150	PDIA3
chr15	+	44715516	44715554	G2689.1	ACATTGAAGTTGACTTACTGAAGAATGGAGAGAGAATTG	20	2	3	182	B2M
chr15	+	45201151	45201186	G2690.1	GCCGTGATCGTATAGTGGTTAGTACTCTGCGTTGTG	378	11	138	4448
chr15	+	64137884	64137930	G2695.1	ATATAAATATATAAATACAAATGTATATTTTTCAGGATGTGGTTTAG	14	6	9	162	SNX1
chr15	+	64455187	64455225	G2697.1	AACTTAAACTCTTACCAAAATCTGTATATTTTTCTTAAG	14	3	14	210	TRIP4
chr15	+	65296075	65296100	G2700.1	CATAAATCTTTCGCCTTTTACTAAAG	18	2	3	150
chr15	+	65296108	65296145	G2700.2	TGGAGAGGAACAACTCTGAGTCTTAACCCAATTTTTTG	20	2	2	154
chr15	+	65304720	65304763	G2701.1	ACTAAAGATTTCCGTGGAGAGGAACAACTCTGAGTCTTAAGCTA	285	2	3	1490
chr15	+	65576434	65576454	G2702.1	TTTTACCTTCTTGAACCAATG	10	3	4	86	HACD3
chr15	+	69452916	69453000	G2705.1	TCCGGCAGCGCCAGCCCTACACTCGCCCGCGCCATGGCCTCTGTCTCCGAGCTCGCCTGCATCTACTCGGCCCTCATTCTGCACG	131	4	7	1021	RPLP1
chr15	+	72474668	72474690	G2707.1	AGTTCGACGAGGACGAGGAGTGC	24	2	2	64	ARIH1
chr15	+	73116557	73116602	G2709.1	TTCACTCCATTTTATTTTCTGGTGGAGCCGGTGGATACACTCTCAG	11	2	3	184	NEO1
chr15	+	77477574	77477606	G2717.1	AACGGTCTGTTTTTGACATCCCTATATTTACAG	20	2	4	196	HMG20A
chr15	+	80755102	80755127	G2722.1	TACTGTACATATTTGCAATCACATTG	11	3	12	98	ABHD17C
chr15	-	28111312	28111342	G2751.1	TATTATAAATATTTCAATTAATTTTACTCTG	19	3	19	285	HERC2
chr15	-	29269370	29269402	G2756.1	AAGAAGATTCCGATCAAGCGGGCCGACATACTG	12	2	2	58	NSMCE3
chr15	-	30939665	30939696	G2758.1	CATTTTTCCCTCTGTAATTTTCTTCCTTCACG	54	4	53	811	MTMR10
chr15	-	40313038	40313073	G2761.1	CTCTGGAGAAACTGCTGCCTCATATCTGGGGGAATG	281	4	14	868
chr15	-	45198642	45198677	G2768.1	GCCGTGATCGTATAGTGGTTAGTACTCTGCGTTGTG	948	10	79	11418
chr15	-	45200449	45200487	G2769.1	CTCGCCGTGATCGTATAGTGGTTAGTACTCTGCGTTGTG	989	9	111	11889
chr15	-	52551091	52551120	G2771.1	TCCTACACAAAACTCTGTAAATCATTATAG	13	2	12	104	ARPP19
chr15	-	52937783	52937828	G2773.1	CTCTGGACTGCATCCTACCACCAACTCGTCCAACTGACAAGCCCTG	25	2	3	159
chr15	-	60351196	60351237	G2784.1	AACAAGCCCCTGTATTTTGCTGATCGGCTGTATGACTCCATG	106	6	13	1119	ANXA2
chr15	-	60382363	60382404	G2788.1	CCTATACTAACTTTGATGCTGAGCGGGATGCTTTGAACATTG	39	2	2	464	ANXA2
chr15	-	64072578	64072614	G2792.1	TACTCAATTTAAATCATTACTCTGTAAAATAAATAAG	34	6	35	376	FAM96A
chr15	-	64160107	64160160	G2798.1	TAATCAAGGACTTCATGATCCAGGGCGGAGACTTCACCAGGGGAGATGGCACAG	24	2	3	135	PPIB
chr15	-	66147097	66147115	G2803.1	ACTTTTGGGTGTCAGTGGC	15	2	28	77	MEGF11
chr15	-	66501018	66501054	G2808.1	GTGGGCATGTGGGACGTTTCTGCATTTGGACTGAAAG	26	4	4	237	RPL4
chr15	-	66501252	66501315	G2809.1	TTATGATGAGATTCCACTTAAGGTCCGTGTTTCTGAAACAAATGATTTTGTGGAAGTTCTGATT	80	5	10	1244
chr15	-	66502022	66502063	G2811.1	TCCGTGTTTCTGAAACACATGATATTTGTGGAAATTCTGACT	142	6	14	1705
chr15	-	66502811	66502843	G2812.1	TACAGAAGGTTGACGAAAATTCTTACTGAGCAA	15	2	2	108
chr15	-	66502866	66502911	G2813.1	TTGCAATGATGTCGTAATTTGCGTCTTACTCTGTTCTCAGCGACAG	216	5	16	2767
chr15	-	66503245	66503311	G2814.1	TAGTGATGAAATTCCACTTCATTGGTCCGTGTTTCTGAACCACATGATTTTCTCGGATGTTCTGATG	110	7	17	1650
chr15	-	68207503	68207524	G2815.1	TCCTGTCACTGCCCTCTCCCTG	19	2	2	131	CLN6
chr15	-	71164694	71164731	G2817.1	CATTTAACCCCCCTGTACACAACTCACTCCTTTTAAAG	10	3	4	105	THSD4-AS1
chr15	-	72199145	72199222	G2818.1	ACTCTGGCCCTGGCCCTTACTTGCTTCTCTAGCTCTCTAGGCCTCTCCAGTTTGCACCTGTCCCCACCCTCCACTCAG	65	4	6	538	PKM
chr15	-	72199229	72199264	G2818.2	TTAGGGGCCTTAGGGCACTGGGCTGTTGTTCCATTG	125	5	11	975	PKM
chr15	-	72199327	72199363	G2819.1	CTTCCTTTCCTGTGTGTACTCTGTCCAGTTCCTTTAG	71	3	4	884	PKM
chr15	-	72200481	72200536	G2823.1	ACCCAGTCCAGGAGGCCTGGGCTGAGGACGTGGACCTCCGGGTGAACTTTGCCATG	175	6	9	1103	PKM
chr15	-	72207135	72207177	G2827.1	ATGATTGGACGGTGCAACCGAGCTGGGAAGCCTGTCATCTGTG	58	2	3	348	PKM
chr15	-	72207199	72207220	G2827.2	CATTGAGATTCCTGCAGAGAAG	31	2	2	70	PKM
chr15	-	72207222	72207258	G2827.3	GCCAGTGATGGGATCATGGTGGCTCGTGGTGATCTAG	23	2	2	207	PKM
chr15	-	72208709	72208829	G2828.1	AACCTTCCTGGGGCTGCTGTGGACTTGCCTGCTGTGTCGGAGAAGGACATCCAGGATCTGAAGTTTGGGGTCGAGCAGGATGTTGATATGGTGTTTGCGTCATTCATCCGCAAGGCATCTG	172	8	12	1478	PKM
chr15	-	72209673	72209718	G2829.1	ATCTACGTGGATGATGGGCTTATTTCTCTCCAGGTGAAGCAGAAAG	72	2	8	602	PKM
chr15	-	72209723	72209766	G2829.2	TGGCTGGACTACAAGAACATCTGCAAGGTGGTGGAAGTGGGCAG	93	2	6	348	PKM
chr15	-	72210389	72210434	G2831.1	CTTTGCTTCTGACCCCATCCTCTACCGGCCCGTTGCTGTGGCTCTA	41	2	2	354	PKM
chr15	-	72217411	72217456	G2832.1	TCTGGAATGAATGTGGCTCGTCTGAACTTCTCTCATGGAACTCATG	108	6	7	1185	PKM
chr15	-	72231124	72231184	G2835.1	CAGCTGCACGCGCCGTGGCTCCGGATCTCTTCGTCTTTGCAGCGTAGCCCGAGTCGGTCAG	108	6	7	924	PKM
chr15	-	73560288	73560325	G2837.1	ATGTGTTGAACCTTATTCTTGTACATTCATTCAATCAA	15	3	15	223	NPTN
chr15	-	77046041	77046074	G2846.1	TTGTAAATAGAAAAATCTAATTCAATAAACTCTG	16	4	18	122	TSPAN3
chr15	-	93043449	93043476	G2862.1	TGTACATACTGTAAATTATTTATTAATG	30	5	33	355	RGMA
chr16	+	2177249	2177271	G2884.1	AGCCCAGCCTGTGCCGCCCTCTG	10	2	2	38	TRAF7
chr16	+	2771350	2771372	G2902.1	TTTTTTAAAATCTGTACAGCAAG	13	2	3	113	SRRM2
chr16	+	3152924	3152956	G2910.1	CATTGGCCTCCTAAGCCAGGGATTGTGGGTTCG	43	3	7	288
chr16	+	3175715	3175747	G2911.1	CATGAGACTCTTAATCTCAGGGTCGTGGGTTCG	30	5	8	254
chr16	+	3191511	3191557	G2912.1	CTCAGTCGGTAGAGCATGGGACTCTTAATCTCAGGGTCGTGGGTTCG	61	2	2	600	AJ003147.2
chr16	+	3193957	3193974	G2913.1	CCAGGGATTGTGGGTTCG	23	2	4	111	AJ003147.2
chr16	+	3317208	3317240	G2914.1	ACACTGAAAATCATCAGCCTGTGTCTCTTTCTG	11	2	2	119	ZNF75A
chr16	+	4508064	4508091	G2917.1	TTCTACCTGTTTGAGAATGTGGACAATG	9	2	2	60	HMOX2
chr16	+	21170519	21170550	G2928.1	TCATGTCGGCCGTTCCTGTTGGATTCTTCCTG	12	2	3	153	TMEM159
chr16	+	22297184	22297205	G2930.1	TCTCTTCGGGGGCGTGGGTTCG	42	3	4	286
chr16	+	23689313	23689360	G2935.1	ACAGCCTGCAGTACATAGAGCGTGACGGCACTGAGTCCTACCTCACCG	18	2	2	139	PLK1
chr16	+	23690222	23690256	G2936.1	TTATTTTTGTACATGTTCGGGTGTGGGTTCTACAG	30	3	30	423	PLK1
chr16	+	28724354	28724389	G2940.1	TTCAGATTGCAGCGGAAAACAACCTGGGAGAGGGCG	11	2	6	39	EIF3C
chr16	+	29807584	29807627	G2947.1	ACCACGACCGCCTCGGGGAAGCGCATCCGGAAGAACCATGCCTG	17	2	2	65	MAZ
chr16	+	30067473	30067526	G2958.1	TCCATTGGCACCGAGAACACCGAGGAGAACCGGCGCTTCTACCGCCAGCTGCTG	52	2	3	193	ALDOA
chr16	+	30068819	30068874	G2963.1	GTTGGATGGGCTGTCTGAGCGCTGTGCCCAGTACAAGAAGGACGGAGCTGACTTCG	59	2	3	322	ALDOA
chr16	+	30069303	30069378	G2964.1	CAGAATGGCATTGTGCCCATCGTGGAGCCTGAGATCCTCCCTGATGGGGACCATGACTTGAAGCGCTGCCAGTATG	59	2	6	475	ALDOA
chr16	+	30069500	30069546	G2965.1	TGCTGGCTGCTGTCTACAAGGCTCTGAGTGACCACCACATCTACCTG	42	3	5	404	ALDOA
chr16	+	30070314	30070359	G2969.1	CTCTTTCTTCCCTCGTGACAGTGGTGTGTGGTGTCGTCTGTGAATG	29	3	3	275	ALDOA
chr16	+	30984584	30984604	G2975.1	CTGGGCTGGACTGTACATATG	15	2	14	76	SETD1A
chr16	+	34160101	34160182	G2982.1	CCGGTACAGTGAAACTGCGAATGGCTCATTAAATCAGTTATGGTTCTTTTGGTCGCTCGCTCCTCTCCTACTTGGAAAACTG	574	13	30	5015
chr16	+	34160367	34160425	G2983.1	ACGACCCATTCGAACGTCTGCCCTATCAACTTTCGATGGTAGTCGCTGTGCCTACCAAG	1159	9	52	8299
chr16	+	34160642	34160687	G2985.1	GTGCCAGCAGCCGCGGTAATTCCAGCTCCAATAGCGTATATTAAAG	474	6	11	2762
chr16	+	34160851	34160944	G2988.1	TTCAAAGCAGGTCCAAGCCGCCTGGATACCGCAGCTAGGAATAATGGAATAGGACCGCGGTTCTATTTTGTTGGTTTATGGAACTGAGGCCATG	2073	9	77	9694
chr16	+	34161209	34161282	G2990.1	TACGGTTGCAAAGCTGAAACTTAAAGGAATTGGTGGAAGGGCACCACCAGGAGTGGAGCCTGCGGCTTAATTTG	1829	9	124	12585
chr16	+	34161414	34161491	G2991.1	CAACGAGACTCTGGCATGCTAACTAGTTACGTGACCCCCGAGCGGTCGGCGTCCCCCAACTTCTTAGAGGGACAAGTG	1568	12	51	9074
chr16	+	34161531	34161596	G2992.1	ATGCCCTTAGATGTCCGGGACTGCACGCGCGCTACACTGACTGGCTCAGCGTGTGCCTACCCTACG	193	7	15	1275
chr16	+	34161681	34161701	G2993.1	TAAGTGCGGGTCATAAGCTTG	245	5	12	1457
chr16	+	34163033	34163059	G2995.1	CAGGACAGATTGATCATCGACACTTCG	78	3	4	389
chr16	+	47504822	47504844	G2996.1	GTGGGATCCCGAGGCCTCTCCAG	276	2	6	1069	PHKB
chr16	+	47505334	47505361	G2997.1	ACCCCAGAAAAGGTGTTGGTTGATACAG	220	3	4	1316	PHKB
chr16	+	47696375	47696407	G2998.1	TTTCAGCAACCAACCCTGTCAGATATGACCATG	12	2	24	72	PHKB
chr16	+	56608609	56608658	G3000.1	AACCCGCGTGCAACCTGTCCCGACTCTAGCCGCCTCTTCAGCTCGCCATG	74	3	4	541	MT2A
chr16	+	56608993	56609025	G3001.1	TGACTCCTGCACCTGCGCCGGCTCCTGCAAATG	45	2	6	196	MT2A
chr16	+	56609381	56609417	G3002.1	TAAAGAACGCGACTTCCACAAACCTGGATTTTTTATG	54	3	5	301	MT2A
chr16	+	56625787	56625821	G3003.1	CTTTCCAACTGCCTGACTGCTTGTTCGTCTCACTG	15	2	3	176	MT1E
chr16	+	56626995	56627022	G3004.1	ATGTAAATAGAACAACCTGCACAACCTG	38	2	11	168	MT1E
chr16	+	68742518	68742557	G3028.1	ATCTCGGAAGCTAAGCAGGGTCGGGCCTGGTTAGTACTAG	9	2	2	68
chr16	+	69463715	69463743	G3033.1	TTTTCCATTTCATCTGTATTTTATCTCCG	44	3	42	633	CYB5B
chr16	+	70538065	70538095	G3037.1	ACACAGTTTTTGCCTTATGAATCTGATCAGG	22	2	2	240
chr16	+	70788694	70788726	G3045.1	GCATTGGTGGTTCAGTGGTAGAATTCTCGCCTG	148	9	31	1597	VAC14
chr16	+	70789507	70789539	G3046.1	GCATTGGTGGTTCAGTGGTAGAATTCTCGCCTG	139	8	34	1495	VAC14
chr16	+	89561429	89561501	G3074.1	TCGCGTGATGACATTCTCCGGAATCGCTGTACGGCCTTGATGAAAGCACATTTGAACCCTTTTCCATCTGATT	394	12	20	3868
chr16	+	89561616	89561664	G3075.1	CATTTCTGTGGATCCGAGGAGGCGGAACAAGTCCACGGAGTCCCTGCAG	37	2	2	176	RPL13
chr16	+	89561677	89561721	G3075.2	CGGCTGAAGGAGTACCGCTCCAAACTCATCCTCTTCCCCAGGAAG	26	3	7	101	RPL13
chr16	-	636752	636789	G3083.1	GTATCATGCAAGATTCCCATTCTTGCGACCCGGGTTCG	79	4	8	838
chr16	-	1963078	1963106	G3094.1	ACTCTCTCGGCTCTGCATAGTTGCACTTG	89	3	4	886
chr16	-	2155055	2155103	G3099.1	TCTGTGATGAATTGCTTTGACTTCTGACACCTCGTATGAAAACTGCACG	278	5	9	1979
chr16	-	2253919	2253959	G3100.1	GCCACTGAAGCTCTCGCCCCTGTAACTTATACCCCACCCAG	36	2	31	156	RNPS1
chr16	-	3180570	3180596	G3108.1	ACTCTTAATCTCAGGGTCGTGGGTTCG	124	2	2	1113
chr16	-	3666010	3666036	G3112.1	TTTTTTGAAGATTACGGCCTGTTCATG	27	2	3	271	TRAP1
chr16	-	3666072	3666096	G3113.1	CAGAGGCTGATCAAATTCTTCATTG	8	2	2	62	TRAP1
chr16	-	3675351	3675378	G3114.1	CAACTTCGTCAGCTTCCCCTTGTACTTG	23	3	6	221	TRAP1
chr16	-	11846541	11846588	G3122.1	TAAACCTTCTGTCCAAGAATTTATCAAGAGAGATCAATGACTGTATAG	12	3	7	141	RSL1D1
chr16	-	18791705	18791739	G3134.1	TTTTAATCCTGTATTATTTCTTCTACTTTGTTTTG	50	10	49	871	ARL6IP1
chr16	-	18836057	18836090	G3135.1	CTCCGTGGCTGTCTGGAGCAACTGCATCACTATG	15	2	3	132	SMG1
chr16	-	27470178	27470218	G3140.1	TGTGGCCGTCCTGACCCTCTTCTCTCTGGGCCTCATTTCTG	27	4	15	376	GTF3C1
chr16	-	28211433	28211457	G3149.1	TCTGCCGGGACCATGACCTGAACTG	11	2	2	51	XPO6
chr16	-	28844700	28844752	G3160.1	CTATAAAGGGGAGGAGACCCCAGTCATCGTAGGCTCTGCTCTCTGTGCCCTTG	23	4	4	183	TUFM
chr16	-	50869453	50869475	G3177.1	GAATACCGGGTGCTGTAGGCTTA	1738	6	23	10403	AC025810.1
chr16	-	58548500	58548535	G3182.1	CCATTCTGCTGTTGCTGTATAGAGTTAAGGAACATG	16	2	7	185
chr16	-	61055543	61055571	G3188.1	TCGCCTTCGTCGAGAGTGCCCTTCTGATG	27	3	4	223
chr16	-	66932256	66932282	G3190.1	ATAAGGAGCGGGTGGCAGCTGCCCTGG	14	2	3	53	FAM96B
chr16	-	69756921	69756951	G3206.1	GTGCAAAAACGAAAGCAACTGGAGCTCAGGC	164	2	5	377
chr16	-	70265609	70265649	G3212.1	GCTCCTCTATGACACCTATGGGTTTCCAGTGGATCTGACTG	12	2	7	95	AARS
chr16	-	70778249	70778280	G3219.1	CATTGGTGGTTCAGTGGTAGAATTCTCGCCTG	289	8	19	3160	VAC14
chr16	-	70779077	70779109	G3220.1	GCATTGGTGGTTCAGTGGTAGAATTCTCGCCTG	280	5	9	3071	VAC14
chr16	-	74453215	74453245	G3228.1	CATCTGTATATTGTTCCTGATTGGCCTGATG	24	4	5	187	GLG1
chr16	-	87830070	87830101	G3243.1	TTACACTGGGCTGGGTTGGGTAGGGTGTTCTG	8	2	3	73	SLC7A5
chr16	-	87830852	87830922	G3247.1	CCTCGGCTAGGGGTCCTCGGGATGCCGTTCTGTTCCAACCTCCTGCTCTGGGACGTGGACATGCCTCAAGG	41	4	4	302	SLC7A5
chr16	-	87832232	87832263	G3254.1	CATCTCCCCTAGCTCACCAGGCCTGGCCTCTG	12	2	2	82	SLC7A5
chr16	-	88726754	88726781	G3265.1	CCTCGTGCTGTGGGACTGCCTCATTCTG	12	4	4	87	PIEZO1
chr16	-	89280599	89280639	G3270.1	AAAACCCTGTGAGCTGGCCTGTGGGCTCGGACCTCCTGCTG	20	2	3	175	ANKRD11
chr16	-	89281765	89281796	G3272.1	CTTCGAGAGGATGCTGTCCCAGAAGGACCTGG	57	2	5	267	ANKRD11
chr16	-	89282671	89282697	G3275.1	AAAAGTTGGAAGAAGAGGCTCTCCATG	17	3	10	75	ANKRD11
chr16	-	89283136	89283175	G3277.1	AGTGAGGACGACAGAGACAGCTGCATGGGGAGCGGGTTCA	16	2	2	76	ANKRD11
chr17	+	5001314	5001359	G3295.1	CATCTTTGCCTATGGGCAGACCGGGGCTGGGAAATCCTATACCATG	16	2	2	168	KIF1C
chr17	+	7413576	7413598	G3310.1	CAACTCAAGGGCCTGATCACATG	13	2	2	50	NLGN2
chr17	+	7496785	7496824	G3314.1	TACCAGCCCAGGATCCGGCGTTCTGGCCTAGAGCTGTATG	29	3	4	226	POLR2A
chr17	+	7500946	7500978	G3317.1	GTGGAGAATGGGGAGCTGATCATGGGCATCCTG	12	2	3	55	POLR2A
chr17	+	7501339	7501381	G3318.1	GACATTCAGAACACTATTAAGAAGGCCAAGCAGGACGTAATAG	87	2	3	278	POLR2A
chr17	+	7501953	7501986	G3320.1	CTTCAAGCACCGGACTCTGCCTCACTTCATCAAG	23	2	2	178	POLR2A
chr17	+	7574713	7574741	G3326.1	TGTCCCTGACCTGGGTAGAGTGGCATCTG	125	4	7	979
chr17	+	7576576	7576619	G3329.1	CCTGTATCGGGGGCACCAACGTGCGTGCTGAGGTGCAGAAACTG	19	3	7	109	SENP3-EIF4A1
chr17	+	7576904	7576950	G3332.1	CCTGGCGGGAAGGTCCTGGGCAAAGGATCAGTCTTTGTACTCTGAGA	78	3	4	830
chr17	+	7578070	7578090	G3336.1	CCTTCCTTGGCTGCCCACATG	26	2	5	151	EIF4A1
chr17	+	8119752	8119787	G3339.1	GGTTCCATGGTGTAATGGTTAGCACTCTGGACTCTG	15	3	5	116
chr17	+	8125746	8125778	G3340.1	GCATTGGTGGTTCAGTGGTAGAATTCTCGCCTG	150	8	27	1623	VAC14
chr17	+	8221570	8221603	G3341.1	CATAGCTGCCTTCCAAGCAGTTGACCCGGGTTCG	25	3	8	178	AL592295.3
chr17	+	16382634	16382670	G3347.1	CATTACTCTGCACTATAGCCATTTGCCCCAACTTAAG	19	2	5	200	UBB
chr17	+	16439553	16439576	G3348.1	ACGACGTCTAATGTCTATCTGACC	35	2	2	243
chr17	+	16440035	16440064	G3349.1	CTGCTCTGATGAAATCACTAATAGGAAGTG	92	2	4	527
chr17	+	16440065	16440106	G3349.2	CCGTCAGAAGCGATAACTGACGAAGACTACTCCTGTCTGATT	615	8	40	5464
chr17	+	16441270	16441298	G3350.1	TGTAGTGGTGAACCTATGGTTTTCTGAAG	318	8	337	3070
chr17	+	18806484	18806516	G3363.1	TAACTGTAAATTAAACCAATCTACAAACTATTG	11	3	9	81	TVP23B
chr17	+	18806521	18806535	G3363.2	CATCTGTAAATTCTG	6	2	4	28	TVP23B
chr17	+	19062003	19062047	G3364.1	TAGCGTTTTCTCCTGAGCGTGAAGCCGGCTTTCTGGCGTTGCTTG	32	8	10	460
chr17	+	19062049	19062094	G3365.1	CTGCAACTGCCGTCAGCCATTGATGATCGTTCTTCTCTCCGTATTG	344	13	100	4337
chr17	+	19062104	19062128	G3365.2	AGGGAGAGAACGCGGTCTGAGTGGT	67	2	3	244
chr17	+	19188051	19188081	G3366.1	TTACTAGAGAAGTTTCTCTGAACGTGTAGAG	12	4	4	101
chr17	+	19188106	19188151	G3367.1	GTAGCGTTTTCTCCTGAGCGTGAAGCCGGCTTTCTGGCGTTGCTTG	32	6	9	438
chr17	+	19188153	19188232	G3368.1	CTGCAACTGCCGTCAGCCATTGATGATCGTTCTTCTCTCCGTATTGGGGAGTGAGAGGGAGAGAACGCGGTCTGAGTGGT	480	16	134	5508	AC007952.4
chr17	+	19452301	19452334	G3369.1	GCAGATCTTGGTGGTAGTAGTAAATATTCAAATG	213	4	205	1909
chr17	+	19452376	19452406	G3370.1	AGCAGTTGAACATGGGTCAGTCGGTCCTGAG	91403	6	1781	544152
chr17	+	19601317	19601351	G3371.1	ACGAGAAGACCCTATGGAGCTTTAATTTATTAATG	45	2	3	492
chr17	+	22522614	22522636	G3376.1	CTTAAAACTCAAAGGACCTGGCG	48	3	5	187
chr17	+	22524413	22524460	G3378.1	ACCTCGATGTTGGATCAGGACATCCCAATGGTGCAGCCGCTATTAAAG	134	2	3	1016	MTRNR2L1
chr17	+	28720568	28720616	G3383.1	TTTTAATCTCCTGACACTTGTGATGTCTTCAAAGGAACCACTGATGCAC	442	13	50	6559	RPL23A
chr17	+	28723442	28723491	G3385.1	AAAAATCATTATTGGAAAAGAATGACATGAACAAAGGAACCACTGAAGTG	352	3	9	1054
chr17	+	28723701	28723748	G3386.1	TTAGCGACCAAAGCCTGATCTTTGCTGATTAGTCATAATTAACTGACT	322	11	23	5066	RPL23A
chr17	+	34962962	34962993	G3394.1	TAAGTTGTAAATATTGTACATAGTTAAATCTG	15	4	15	168	ZNF830
chr17	+	37510717	37510759	G3401.1	GACTTTCTGGATCCGGACCCAGGCAGCGCACACTGGACTCTTG	16	2	2	142	DUSP14
chr17	+	38867645	38867677	G3404.1	GGGGGTATAGCTCAGTGGTAGAGCATTTGACTG	15	3	5	130
chr17	+	38920459	38920488	G3407.1	ATTCATCTCTGGTTTTCTTGCCACCCTCTG	14	3	16	166	LASP1
chr17	+	39203039	39203093	G3409.1	ATGAGGAGAATGAGGATTTTGCGCCGGCTGCTCAGAAGATACCGTGAATCTAAGA	124	4	8	998	RPL19
chr17	+	39204643	39204675	G3410.1	AAATAAAACCTCCCACTTTGTCTGTACATACTG	27	2	5	265	RPL19
chr17	+	39653716	39653742	G3412.1	TCTTCATCTCCCTGCTCTGGATCATCG	11	2	12	98	STARD3
chr17	+	44350295	44350327	G3439.1	CTGTGTTATGGTCGATGGCTCCTGGGGGTGCTG	23	2	2	173	GRN
chr17	+	44351077	44351105	G3440.1	ACACTGTGTGTGACCTGATCCAGAGTAAG	27	2	2	177	GRN
chr17	+	44351592	44351620	G3441.1	TTTACGTGTGACACGCAGAAGGGTACCTG	22	2	3	127	GRN
chr17	+	45149044	45149074	G3445.1	CTAAAGGCGTCACTGCAGGAATTACAAACTG	28	2	9	150	HEXIM1
chr17	+	47652752	47652797	G3451.1	CCAGAGTTGCAGCTGGTCTACAAATCAAGAACTCTTTGACATCTAA	25	2	2	247	KPNB1
chr17	+	47677025	47677048	G3458.1	TTTGGCAGCTGTGGGCTTAGTGGG	12	2	2	93	KPNB1
chr17	+	48060528	48060568	G3472.1	TTTGTGTTCCCCACCCCTCACAGACTGCCTGAGCTCTTCTG	11	2	3	140	NFE2L1
chr17	+	48061357	48061404	G3473.1	CTTTTATAAATTATTTTCCTTGTAGATTTTATTTTTAATTTATCTCTG	25	6	31	668	NFE2L1
chr17	+	50070858	50070885	G3482.1	ATTCAGCGCAAGGAGTGGGACTTATCTG	35	2	3	224	ITGA3
chr17	+	51160027	51160057	G3499.1	TCCATTCTTTGCCGGCCTGGTGAAATACATG	10	3	6	90	NME1
chr17	+	51161774	51161815	G3500.1	ATCGGCTTGTGGTTTCACCCTGAGGAACTGGTAGATTACACG	63	3	9	515	NME1
chr17	+	51166435	51166463	G3502.1	GTGGTCGCACCAGCTCTCTGCTCTCCCAG	30	2	3	192	NME2
chr17	+	51170009	51170045	G3505.1	CCAGGCACCATTCGTGGGGACTTCTGCATTCAGGTTG	26	5	7	207	NME1-NME2
chr17	+	57120981	57121011	G3508.1	CAAACTCTGTAAATATGTGTTTAAACAAATG	13	2	13	117	AKAP1
chr17	+	59647481	59647523	G3516.1	AAATGGATCTCTTTGAATACGGTTGCTCTTGTTACGGATAATG	22	2	3	260	CLTC
chr17	+	59655898	59655943	G3519.1	TTATATCCACCTCTATGATCTTGAGACTGGTACCTGCATCTACATG	29	2	8	347	CLTC
chr17	+	59681689	59681731	G3527.1	TTTGCTGAACGTTGCAATGAACCTGCGGTCTGGAGTCAACTTG	16	3	4	128	CLTC
chr17	+	59682391	59682429	G3529.1	AATTTATCAATGGACCAAATAATGCTCATATCCAACAAG	10	2	3	97	CLTC
chr17	+	59841273	59841295	G3533.1	TAGCTTATCAGACTGATGTTGAC	1276	8	46	10154
chr17	+	64146072	64146155	G3540.1	GGGGCCGGCCTGCTGTGATGACATTCCAATTAAAGCACGTGTTAGACTGCTGACGCGGGTGATGCGAACTGGAGTCTGAGCCTG	972	15	45	6064	SNHG25
chr17	+	64146337	64146363	G3542.1	ACGCGCTGTCTTTGAGCCCCCGCCGAG	129	2	5	640	SNHG25
chr17	+	64146364	64146391	G3543.1	CTTCCTCGTGGCGCCGGGGGTCAATCTG	32	2	3	161	SNHG25
chr17	+	67738169	67738201	G3548.1	TTTTTGACTATAGTATAAATTCTGTACATGATG	12	2	2	156	NOL11
chr17	+	68035747	68035770	G3552.1	AGCTGAGTCGAGGTGGACCCTTTG	10	2	3	57	KPNA2
chr17	+	68046690	68046712	G3557.1	TTACTGTAGCACTTTTTACACTG	26	3	3	257	KPNA2
chr17	+	68046730	68046751	G3558.1	TTCCAACTGTACATACATACTG	190	5	172	1145	KPNA2
chr17	+	68046811	68046833	G3559.1	CATCCTGTAAATAAACATTCAAG	54	3	54	270	KPNA2
chr17	+	75033924	75033962	G3570.1	ATAAGGCACTGGCCTCCTAAGCCAGGGATTGTGGGTTCG	35	2	3	212	KCTD2
chr17	+	75742627	75742662	G3582.1	ACGTACGGGTGCCCCTCTTTATCCGGCCTGAGGATG	17	2	4	133	ITGB4
chr17	+	76268075	76268117	G3588.1	TCCCGTACATTACTGTAGATTCCCATAGTTGGAAGCTTCCCAG	13	2	2	167	UBALD2
chr17	+	76558832	76558865	G3590.1	TATCTTTTGTGAGGAGGTCTGACTTGCTGAGGCT	216	5	7	2657	SNHG16
chr17	+	76561113	76561152	G3591.1	GTCCATGATGATTTCAAGTTATCCCTGTCTGAAGGCAAAG	73	6	26	680
chr17	+	76561153	76561189	G3592.1	AAAGGCCTTTCTGTGTGGAATTTGAATATCTGAAACT	659	9	24	7864
chr17	+	76561649	76561678	G3593.1	TTAGTTATCCCTGTCTGAAAATCTGGACTG	137	4	4	1176	SNHG16
chr17	+	77089307	77089330	G3595.1	ACGGTCTGGGGAAAGGCTCCTGTG	71	2	2	353	SNHG20
chr17	+	77206255	77206287	G3596.1	AAGGGCTGAACATGCGCCACTTGTGGAGACCTG	10	2	6	46	SEC14L1
chr17	+	82237150	82237185	G3632.1	CACTCAACTTCCAGCCCTCGCTCATCATGCTGAACC	18	2	4	132	SLC16A3
chr17	+	82237404	82237430	G3633.1	CGACCCTCCCGGCGCCTGCTAGACCTG	15	2	2	52	SLC16A3
chr17	+	82237677	82237728	G3635.1	TTCTTCAACGGCCTCGCGGACCTGGCGGGTTCTACGGCGGGCGACTACGGCG	46	3	44	287	SLC16A3
chr17	+	82239243	82239285	G3636.1	CGGCCACTGCTATGCTCAAGGACCTGGAAACCCATGCTTCGAG	18	2	4	117	SLC16A3
chr17	-	746761	746803	G3640.1	AAGATGGACCGCCATATGGAAGTGTGCTACATTTTTGCCTCTG	14	2	2	179	GEMIN4
chr17	-	979408	979435	G3646.1	CCGCGGCGGCGCCTGGAGATCGTCTTCG	16	2	2	78	NXN
chr17	-	1472138	1472186	G3651.1	ATCCTGCAGTCTAAGGAGCCCGCCTACGTCCGCTGCATCAAACCCAATG	10	2	9	77	MYO1C
chr17	-	1674591	1674611	G3671.1	TATGGCCTGGTGATGGATTTG	31	2	2	170	PRPF8
chr17	-	1677051	1677082	G3675.1	ATATTCTGGACATGATGCCTGAGGGGATCAAG	9	2	9	35	PRPF8
chr17	-	1679619	1679641	G3679.1	TCGGGCCCTGGACATACCCCTTG	35	2	3	169	PRPF8
chr17	-	1680767	1680787	G3680.1	ACTTGCCAGCTTTCTACTTTG	31	2	2	256	PRPF8
chr17	-	2329165	2329199	G3690.1	ATGTTTTTATTCAAAATGTCTGAACCTGTCTGAAG	15	2	9	201
chr17	-	2330322	2330352	G3691.1	TTTTATTCATATCGTCTGAACCTGTCTGAAG	44	2	2	557
chr17	-	4946638	4946740	G3711.1	TTCGGTGATCCGGGACTCACTGCTGCAGGATGGGGAATTTAGCATGGATCTTCGTACCAAGAGCACCGGTGGGGCCCCCACCTTCAATGTCACTGTCACCAAG	72	5	9	523	PFN1
chr17	-	7260228	7260271	G3720.1	CCTCCTGGTCACTCTGTCCCTGCACTCCATGTATAGTCCTCTTG	13	2	3	114	CLDN7
chr17	-	8173501	8173542	G3732.1	ATTAGAACATGATGATTGGAGATGCATGAAACGTGATTAACG	112	4	27	780	TMEM107
chr17	-	8222871	8222894	G3735.1	TCTAGGGGTATGATTCTCGCTTCG	15	2	3	125	LINC00324
chr17	-	17383608	17383650	G3745.1	CTCCAAACTCATCCTCTTCCCCAGGAAGCCCTCGGCCCCCAAG	31	3	3	203
chr17	-	19063920	19063958	G3768.1	TATTGGGGAGTGAGAGGGAGAGAACGCGGTCTGAGTGGT	208	2	3	782
chr17	-	19063959	19063999	G3768.2	CTGCAACTGCCGTCAGCCATTGATGATCGTTCTTCTCTCCG	740	10	44	9400
chr17	-	19112420	19112499	G3771.1	CTGCAACTGCCGTCAGCCATTGATGATCGTTCTTCTCTCCGTATTGGGGAGTGAGAGGGAGAGAACGCGGTCTGAGTGGT	948	13	56	10511	AC007952.4
chr17	-	19112501	19112548	G3772.1	AGGTAGCGTTTTCTCCTGAGCGTGAAGCCGGCTTTCTGGCGTTGCTTG	86	4	6	1225	AC007952.4
chr17	-	19190029	19190108	G3773.1	CTGCAACTGCCGTCAGCCATTGATGATCGTTCTTCTCTCCGTATTGGGGAGTGAGAGGGAGAGAACGCGGTCTGAGTGGT	936	10	49	10597	AC007952.4
chr17	-	19190175	19190210	G3774.1	TTACTAGAGAAGTTTCTCTGAACGTGTAGAGCACCG	50	3	5	411
chr17	-	19446227	19446271	G3775.1	GCCTCATCCCTGCACCCAGGGGCACTGGCATCGTCTCCGCACCTG	29	3	3	156
chr17	-	21002824	21002859	G3778.1	ACCACACGGACGGGGAGGCTCCTGGAGCTGCTTTGA	20	3	5	79	USP22
chr17	-	28396288	28396310	G3785.1	CAGGGCTGGGGAACTGGGGACTG	16	3	16	32	SLC46A1
chr17	-	28615771	28615789	G3787.1	AACAGTGTGGACTGGGGTG	18	2	3	69	KIAA0100
chr17	-	28619965	28620000	G3788.1	AAGCAACGGGTCAGGTTCCAGCTTGAGATCTCTAGC	10	2	2	78	KIAA0100
chr17	-	28635080	28635110	G3791.1	TGGAGTTTCCTTATCAGTATGACTTTTCTCG	18	2	36	216	KIAA0100
chr17	-	31034394	31034430	G3797.1	ATCACCTCTGAGACCCACCTTGCTCATAAACAAAATG	33	4	4	214	RBFOX2
chr17	-	35151122	35151257	G3802.1	CCGCGACCTCAGATCAGACGTGGCGACCCGCTGAATTTAAGCATATTTGTCAGCGGAGGAAAAGAAACTAACCAGGATTCCCTCAGTAATGGCGAGTGAACAGGGAAGAGCCCAGCGCCGAATCCCCGCCCCGCGG	220256	17	1516	1166347
chr17	-	35151262	35151286	G3802.2	TGTGGGGCCCAAGTCCTTCTGATCG	886	4	17	4522
chr17	-	37280143	37280175	G3811.1	ATTTTTTTTTAACTTACAAAACTCACAAAATTG	10	2	2	138	ACACA
chr17	-	38731800	38731821	G3814.1	AATACCAGGTGCTGTAGGCTTT	354	3	5	2419
chr17	-	38852864	38852889	G3818.1	TTTGCTTCAATCGGTGGTGTGACAAG	119	2	2	952
chr17	-	41523696	41523725	G3830.1	CTTCTGCTGTCCTTTGGAGGGTGTCTTCTG	14	2	2	180	KRT19
chr17	-	41524143	41524203	G3833.1	TACTGACCTGCGGCGCACCCTTCAGGGTCTTGAGATTGAGCTGCAGTCACAGCTGAGCATG	16	2	6	126	KRT19
chr17	-	41527828	41527871	G3837.1	ACTACAGCCACTACTACACGACCATCCAGGACCTGCGGGACAAG	66	2	2	180	KRT19
chr17	-	41527963	41528007	G3838.1	AAGCTAACCATGCAGAACCTCAACGACCGCCTGGCCTCCTACCTG	78	3	3	367	KRT19
chr17	-	41528011	41528036	G3838.2	CGTCCGACGGGCTGCTGGCGGGCAAC	66	2	3	156	KRT19
chr17	-	41528202	41528244	G3839.1	ACTTCCTACAGCTATCGCCAGTCGTCGGCCACGTCGTCCTTCG	23	2	3	115	KRT19
chr17	-	41528245	41528273	G3839.2	TTGCTCCGTCCGTGCTCCGCCTCGCCATG	17	2	3	106	KRT19
chr17	-	41867836	41867878	G3852.1	AAGCAGGGGCTGTATCGTCATCCGTGGGATGATATTTCATATG	13	2	2	111	ACLY
chr17	-	41887676	41887708	G3856.1	TCTAGATCCGGACCATCGCCATCATAGCTGAAG	14	2	20	54	ACLY
chr17	-	41912462	41912507	G3860.1	TCGTGGAAAACTTGGTCTCGTTGGGGTCAACCTCACTCTGGATGGG	15	2	2	156	ACLY
chr17	-	42672238	42672254	G3869.1	AACTCTTCCTGCAGCTG	7	2	2	33	PLEKHH3
chr17	-	43768222	43768267	G3874.1	AAAGTGATTGTGATGCTATTTATCTTCAGGGTCACTCTGGGCAAAG	11	2	12	153	DUSP3
chr17	-	49409398	49409445	G3904.1	CATCCTCTTCCGGCCTGTCGCCAGCCAGCTTCCTCGCATCTTCACCAG	11	2	2	130	PHB
chr17	-	50133807	50133838	G3907.1	AGGGCCGCATCTCTGTATATAATATATATATG	54	7	63	531	PPP1R9B
chr17	-	50382159	50382185	G3911.1	CTATCATCAGGTCACGGGCAGCTCCTG	17	3	5	97	LRRC59
chr17	-	56891314	56891353	G3921.1	TTCTGTCTTGGGCCACTTGGATCTGAAGGCTGCCCCTTTG	20	2	2	278	TRIM25
chr17	-	57791343	57791389	G3922.1	TGAACAGCAGTTGAACATGGGTCAGTTGGTCCTGAGAGATGGGTGAG	1967	8	47	12071	AC015845.2
chr17	-	64749683	64749705	G3956.1	CATCCTGTAAATAAACATTCAAG	40	3	36	204	KPNA2
chr17	-	67338302	67338336	G3960.1	TTCGGAACCTCAATTAATCCTGTTTTACATTTCAG	14	2	3	193	PSMD12
chr17	-	68019897	68019930	G3961.1	CTGGGGATTGTGGGTTCGAGTCCCATCTGGGTCG	501	5	14	3163
chr17	-	75042243	75042276	G3967.1	TTGGCTGCTTTACCTGAGAATCCACCAGCTATCG	11	2	4	106	ATP5H
chr17	-	75318136	75318162	G3969.1	ACCTATGTACTTAATCCTTTAACTCTG	15	5	15	141	GRB2
chr17	-	75319229	75319260	G3970.1	TCTCCTACTCTGTGTAAATATTTTTCCCTCCG	12	2	4	125	GRB2
chr17	-	75778545	75778565	G3972.1	TAAATTCTGTAAAATACTTTG	17	5	17	134	H3F3C
chr17	-	76734206	76734248	G3985.1	TAAGGAAGCAAATGGTTGTAACTTTGTAAGTACTTATAACATG	38	6	38	439	SRSF2
chr17	-	76736936	76736978	G3990.1	CTTTCACGACAAGCGCGACGCTGAGGACGCTATGGATGCCATG	29	2	2	134	SRSF2
chr17	-	77162259	77162305	G3991.1	AGGAGCCAATGGGGCGAAGCTACCATCTGTGGGATTATGACTGAACG	564499	9	9658	4861030
chr17	-	78971491	78971531	G4002.1	CCCTCACTGCAGGCTCCCCTCCTCGGCTTCCTTCCTCTCTG	20	2	2	164	LGALS3BP
chr17	-	78972637	78972681	G4010.1	ACATCACCCTGTCGTCAGTCAAGTGCTTCCACAAGCTGGCCTCTG	18	2	8	143	LGALS3BP
chr17	-	80135298	80135346	G4019.1	ATATGGGGATTCTGCTCTCTTTTCTTATTTACATGTAAATAATACATTG	11	4	10	211	EIF4A3
chr17	-	81219867	81219891	G4024.1	AGGAAGGTGCTGGTGAGTACTGTGG	10	3	12	48	CEP131
chr17	-	81510358	81510419	G4029.1	TCACTTCGTGGCTAAGGTAAGAACGTGCTTGTGGAAGACAAGTCTGTGGCTTGGTGAGTCTG	26	2	4	130	ACTG1
chr17	-	81510434	81510471	G4029.2	TTTAATACCCTGTACATATCTTTGAGTTCAACCTTTAG	28	4	9	314	ACTG1
chr17	-	81510583	81510619	G4030.1	CACACACCTCATGCTAGCCTCACGAAACTGGAATAAG	21	2	2	80	ACTG1
chr17	-	81510771	81510809	G4032.1	TACTCGGTGTGGATCGGTGGCTCCATCCTGGCCTCACTG	30	2	4	286	ACTG1
chr17	-	81510996	81511027	G4033.1	CCAACACGGTGCTGTCGGGCGGCACCACCATG	64	2	6	210	ACTG1
chr17	-	81511231	81511278	G4034.1	AAGAGCTACGAGCTGCCCGATGGCCAGGTCATCACCATTGGCAATGAG	25	2	3	189	ACTG1
chr17	-	81511282	81511374	G4035.1	CGGGAAATCGTGCGCGACATCAAGGAGAAGCTGTGCTACGTCGCCCTGGACTTCGAGCAGGAGATGGCCACCGCCGCATCCTCCTCTTCTCTG	484	8	22	3433	ACTG1
chr17	-	81511407	81511459	G4035.2	TCTGGACCTGGCTGGCCGGGACCTGACCGACTACCTCATGAAGATCCTCACTG	233	5	9	1321	ACTG1
chr17	-	81511524	81511593	G4036.1	TACGTGGCCATCCAGGCCGTGCTGTCCCTCTACGCCTCTGGGCGCACCACTGGCATTGTCATGGACTCTG	187	5	9	1451	ACTG1
chr17	-	81512097	81512138	G4038.1	TCATGGTGGGCATGGGCCAGAAGGACTCCTACGTGGGCGACG	174	2	4	772	ACTG1
chr17	-	81512745	81512791	G4042.1	CCGCTGCCAGCTCTCGCACTCTGTTCTTCCGCCGCTCCGCCGTCGCG	93	3	3	753	ACTG1
chr17	-	81845901	81845942	G4051.1	TCAAGGTGCTTGTTGGGAAGAACTTTGAAGACGTGGCTTTTG	24	2	2	296	P4HB
chr17	-	81859278	81859311	G4059.1	TTCCGAGATCAGGTTGGCCAAGGTGGACGCCACG	45	3	3	221	P4HB
chr17	-	81932853	81932870	G4076.1	TCAAGGACCCCCTCTGTG	74	2	5	291	PYCR1
chr17	-	82078835	82078864	G4082.1	CGCCCGTGGGGTCTGCGCTTGGTCTTTCTG	44	2	3	345	FASN
chr17	-	82079003	82079025	G4083.1	CCACTGCCCCCCGAGGCTGCTAG	26	2	2	64	FASN
chr17	-	82081285	82081331	G4092.1	TCAACCTGGACAGCTCACTGGCGGACCTGGGCCTGGACTCGCTCATG	39	3	6	309	FASN
chr17	-	82081773	82081810	G4095.1	TGGGCATTTTGGTGGAGACGATGAGCACCAACGACACG	73	2	2	309	FASN
chr17	-	82082123	82082149	G4096.1	AGGCGTGCCCTGAGCTGGACTACTTTG	24	2	4	157	FASN
chr17	-	82082328	82082377	G4097.1	AGTTCTTCCAGGACGTCTGCAAGCCCAAGTACAGCGGCACCCTGAACCTG	46	3	3	201	FASN
chr17	-	82083026	82083061	G4099.1	TCGGCCATCTCCAAGACCTTCTGCCCGGCCCACAAG	27	2	2	148	FASN
chr17	-	82084252	82084290	G4105.1	CCTGGCCACCTCTGTCCTGCTGTCACCGGACTTCCTCTG	24	2	2	132	FASN
chr17	-	82084298	82084376	G4105.2	ACCTCCCAGGACAGCCTGCTAGGTATGGAGTTCTCGGGCCGAGACGCCAGCGGCAAGCGTGTGATGGGACTGGTGCCTG	76	4	9	419	FASN
chr17	-	82086306	82086351	G4110.1	ACCCTCTGCTCAGCGGCCTCCTGGACTCCCCGGCACTCAAGGCCTG	47	3	4	305	FASN
chr17	-	82087449	82087481	G4115.1	AAGGATAACTGGGTGAGCTTCATGGACACCATG	54	2	4	358	FASN
chr17	-	82090499	82090541	G4121.1	CTGCATGGGGCTGAGGCCAGATGGCATCGTCGGCCACTCCCTG	32	2	3	158	FASN
chr17	-	82090882	82090919	G4122.1	ACATCGTCCATTCGTTTGTGAGCCTGACTGCCATCCAG	20	2	4	167	FASN
chr17	-	82091583	82091602	G4126.1	ATGGGCGGCTGCAGGTGGTG	49	2	2	183	FASN
chr17	-	82093632	82093655	G4130.1	GTGGGCTGCCAGCGAGCGATGATG	29	2	4	100	FASN
chr17	-	82093701	82093746	G4130.2	AACACACACTGGCGTCTGGGTGGGCGTGAGCGGCTCTGAGACCTCG	37	2	4	192	FASN
chr17	-	82095351	82095385	G4131.1	CACACACGATGGACCCTCAGCTGCGGCTGCTGCTG	10	2	2	52	FASN
chr17	-	82096344	82096388	G4132.1	CAGGAGTTCTGGGACAACCTCATCGGCGGTGTGGACATGGTCACG	119	3	6	848	FASN
chr18	+	8718425	8718448	G4152.1	ATGAGTTAGATGAACTCCGTGCTG	13	2	3	88	MTCL1
chr18	+	12725696	12725737	G4159.1	CACCAAATGTAAATTTTGTACAATAAAATTTTATTTCCTAAG	11	5	14	162	PSMG2
chr18	+	31548375	31548409	G4163.1	AAACTTTAAAATTTTGTAGATTTTAAAAAATATTG	10	4	10	140	DSG2
chr18	+	59824291	59824312	G4178.1	TTCACCAAGGAGGACCTCACTG	15	2	3	56
chr18	+	80012976	80013057	G4181.1	ACGACCTGCTTCTGGGTCGGGGTTTCGTACATAGCAGAGCAGCTCCCTCGCTGCGATCTGTTGAAAGTCAGCCCTCGACACA	1758	10	60	12621
chr18	-	6462451	6462498	G4187.1	CTTATTACTTGTGACTGGACCTCTGGTCCTCAATCGAGTTCCTCTACG	12	2	2	136
chr18	-	9547009	9547036	G4189.1	CAACTTCTTCACATACTGTACATACCTG	10	3	12	78	PPP4R1
chr18	-	12340275	12340299	G4190.1	ACTTTAGGTGGTCGAGTCTCTGAAG	21	2	2	166	AFG3L2
chr18	-	31069067	31069099	G4194.1	TTTGTGGCACCGTGGGATCAGGAATCAAAAACG	14	2	2	90	DSC2
chr18	-	36109144	36109166	G4197.1	AAAGGAGAAAAGAGAAGAATCTG	11	2	12	10	SLC39A6
chr18	-	46089923	46089962	G4201.1	GTGTTGTCGTGTTTGGAAATGATAAACTAATTAAGGAAGG	37	2	17	421	ATP5A1
chr18	-	49489263	49489308	G4204.1	TTGCTGTGATGACTATCTTAGGACACCTTTGGAATAACTATGAAAG	676	12	55	7743
chr18	-	49491283	49491347	G4205.1	CTGCAGTGATGACTTTCTTAGGACACCTTTGGATTTACCGTGAAAATTAATAAATTCTGAGCAGC	913	14	49	6614
chr18	-	49491670	49491729	G4206.1	CTGCGATGATGGCATTTCTTAGGACACCTTTGGATTAATAATGAAAACAACTACTCTCTG	104	2	9	977	RPL17
chr19	+	583165	583203	G4232.1	TTTAATTTTATGAGGGCCACGGGTCTGTGTTCGACTCAG	16	3	6	96	BSG
chr19	+	804542	804582	G4236.1	CGGCCCTGCAGGCGGTGAACTCGGTCCAGTCGGGGAACCTG	30	2	3	125	PTBP1
chr19	+	808623	808655	G4239.1	CTGCCCCGCGAGGGCCAGGAGGACCAGGGCCTG	18	2	4	19	PTBP1
chr19	+	811412	811446	G4241.1	AGCTGGTCGACATAATCTCTGTATTATATACTTTG	43	2	40	456	PTBP1
chr19	+	1104086	1104127	G4246.1	CTCTGTGGGGCTCTGGCCGCGCCTGGCCTGGCCGGGACCATG	14	2	2	107	GPX4
chr19	+	4770700	4770723	G4291.1	TGGAAGACTAGTGATTTTGTTGTT	13	3	5	138	HNRNPK
chr19	+	5668266	5668298	G4299.1	ATGCCCGCTTCACTCGCCGCTACTGAGTACTTG	20	2	2	178	SAFB
chr19	+	5691556	5691594	G4303.1	AGGAAGCGGGAGGAGCTGAGCAACGTACTGGCCGCCATG	39	2	7	91	RPL36
chr19	+	7644615	7644638	G4310.1	ACCTGGCCATGGGCTCCGACGCAG	11	2	2	31	STXBP2
chr19	+	8462529	8462564	G4314.1	TTGGTGAGGTAACATACGTGGAGCTCTTAATGGACG	18	2	8	155	HNRNPM
chr19	+	10107659	10107684	G4316.1	TCTCATGATGAACACATATGCCTCTG	23	2	2	164
chr19	+	11105474	11105523	G4334.1	TTCCAAGGGGACAGTAGCCCCTGCTCGGCCTTCGAGTTCCACTGCCTAAG	14	3	3	151	LDLR
chr19	+	11105549	11105585	G4335.1	CGCTGTGATGGTGGCCCCGACTGCAAGGACAAATCTG	13	2	2	73	LDLR
chr19	+	11116094	11116128	G4336.1	CTTCATGTACTGGACTGACTGGGGAACTCCCGCCA	64	2	5	367	LDLR
chr19	+	11131418	11131451	G4337.1	CTTTGTTTTATATATTTATTCATCTGGGAGGCAG	11	3	14	150	LDLR
chr19	+	11408822	11408863	G4338.1	ATCGAACTCCTTGTTCTACTCTTTCCCCCCTTCTCACTACTG	29	5	17	395
chr19	+	11450679	11450705	G4341.1	TGCCGTCCACCCGCCCCTCTGGGCCTG	16	3	4	76	PRKCSH
chr19	+	12894136	12894181	G4346.1	AAGCTGAACATCTCCTTCCCAGCCACTGGCTGCCAGAAACTCATTG	12	3	3	79
chr19	+	12939571	12939600	G4349.1	TTTCCTAATAGTTTGGACCAGACAGACATG	24	3	3	213	CALR
chr19	+	16118232	16118279	G4380.1	ACTTTAAAATTAGGACCATAGAGCTCGATGGCAAGAGAATTAAACTGC	19	2	6	156	RAB8A
chr19	+	17567472	17567521	G4390.1	ACGGTGGTCGCCCCCATGCTGGATTCCCGGGCTGCGTACTCCAACTTCTG	13	2	2	112	COLGALT1
chr19	+	18177984	18178011	G4398.1	ACCCTCGGCACCTGCTACTTACCAACTG	15	2	14	76	AC007192.1
chr19	+	18386306	18386344	G4399.1	TTTCCCGGGACCCTCAGAGTTGCACTCCGAAGACTCCAG	32	2	4	167	GDF15
chr19	+	18386355	18386390	G4399.2	TTGCGGAAACGCTACGAGGACCTGCTAACCAGGCTG	34	2	7	102	GDF15
chr19	+	18386413	18386459	G4399.3	ATTCGAACACCGACCTCGTCCCGGCCCCTGCAGTCCGGATACTCACG	19	2	4	97	GDF15
chr19	+	18388471	18388515	G4401.1	CTGCACCTGCGACTGTCGCCGCCGCCGTCGCAGTCGGACCAACTG	154	4	14	667	GDF15
chr19	+	18389111	18389147	G4406.1	CTGGTCTGATGGAACTGTGTATTTATTTAAAACTCTG	46	4	31	398	GDF15
chr19	+	18846046	18846068	G4413.1	TTGGCTGAGTTGAACTTCGAGGA	47	2	20	267	UPF1
chr19	+	30007550	30007594	G4425.1	AAATCCAAGGATTTGCTAGCTGATAAAGAACTGTGGGCTCGACTT	14	3	9	102	URI1
chr19	+	34368602	34368636	G4430.1	TGGCTCTGCGGAACCGGTCAAACACACCCATCCTG	30	2	2	172	GPI
chr19	+	34393932	34393993	G4434.1	ACGCCCCTGGAGAAGAACGCCCCCGTCTTGCTGGCCCTGCTGGGTATCTGGTACATCAACTG	52	5	7	498	GPI
chr19	+	34394007	34394049	G4434.2	ACACACGCCATGCTGCCCTATGACCAGTACCTGCACCGCTTTG	16	2	2	95	GPI
chr19	+	34434922	34434945	G4438.1	AAAGTGGAACAGCTGGGTATCTTG	15	2	3	87	UBA2
chr19	+	35267377	35267426	G4445.1	AAGCCGGGCCTACATGCCCCCGCGGAGCCGCAGCCGGGACGACCTCTATG	43	2	4	145	LSR
chr19	+	35383364	35383404	G4450.1	CTCTGGACTGCATCCTACCACCAACTCGTCCAACTGACAAG	19	3	11	130
chr19	+	35546769	35546803	G4451.1	CTGCCCTGGGCTGGGCCACTGCTGAGCTTATTATG	17	2	9	145	TMEM147
chr19	+	35575608	35575665	G4452.1	CATCAGACCCCAGAAAAGGTGTTGGTTGATATAGACAGCAGGACGGTGGCCATGGAAG	97005	10	5305	820594	AD000090.1
chr19	+	35575684	35575729	G4453.1	TGTGTAACAACTCACCTGCCGAATCAACTAGCCCTGAAAATGGATG	671	7	76	4168
chr19	+	35575801	35575839	G4454.1	GGGCCGAAACGATCTCAACCTATTCTCAAACTTTAAATG	1206	10	84	11229
chr19	+	38290174	38290217	G4461.1	GTACTTTGACGTGGAGAGGAACTCCTGCAATAACTTCATCTATG	30	2	3	344	SPINT2
chr19	+	38725794	38725840	G4472.1	AACGCAGCATCGTGGACTACAAGCCCAACCTGGACCTGCTGGAGCAG	61	3	3	331	ACTN4
chr19	+	40799796	40799843	G4487.1	CTCCGCCCCGGGTCCTCCCTCCCAGCTTCCCTCCGGTCTATTTTTCTG	10	3	3	147	EGLN2
chr19	+	41306974	41307003	G4491.1	TTGTAAATTCTCCCAGGAGCTGTTTTACTG	13	2	17	139	HNRNPUL1
chr19	+	41860818	41860846	G4492.1	TCAGAGCTCTGGCAGCCTTCCTCAAAAAG	36	2	2	203	RPS19
chr19	+	41869045	41869083	G4494.1	CACCTGTACCTCCGGGGTGGCGCTGGGGTTGGCTCCATG	20	2	4	158	RPS19
chr19	+	41871406	41871439	G4495.1	CTCATTCGTAATCCTGGTCTGGGTCTCTTTTTTG	14	2	17	207	RPS19
chr19	+	45303205	45303241	G4511.1	TACAAATCCTTGTAAATACCCCACACCCTCCCCTCTG	11	2	11	86	MARK4
chr19	+	46559063	46559101	G4514.1	CTTCAAGATCATCAGCAATGCCTCCTGCACCACCAACTG	25	3	26	170
chr19	+	46601365	46601402	G4515.1	GAACTGCTGCAGCTGCTGCCGCCGCCGGAGGAACCTTG	39	3	5	179	CALM3
chr19	+	48960906	48960929	G4529.1	GGTGGTTGGGTGAGACTCCTCAAG	18	2	2	106	BAX
chr19	+	48966727	48966761	G4534.1	CACGACTAAGAGCCTTCTGAGCCCAGCGACTTCTG	24	2	2	141	FTL
chr19	+	49490012	49490047	G4540.1	GCCATGAGATCAACCCCATGCACCGCTCTGAGACCT	102	2	3	529	RPL13A
chr19	+	49490240	49490276	G4541.1	GTGGTGGTCGTACGCTGTGAAGGCATCAACATTTCTG	13	2	2	107	RPL13A
chr19	+	49490923	49490972	G4544.1	CAACTACCTACATTGTTTGATCCTCATGAAAGCAGCACTGGCTGAGACGC	272	10	28	2974
chr19	+	49491040	49491080	G4545.1	AAAAAGCGGATGGTGGTTCCTGCTGCCCTCAAGGTCGTGCG	29	2	2	197	RPL13A
chr19	+	49491175	49491218	G4546.1	GGCAGATGATGTCCTTATCTCACGATGGTCTGCGGATGTCCCTG	113	5	10	1216
chr19	+	49491219	49491255	G4546.2	TGGGAATGGCGACAATGCCAATGGCTTAGCTGATGCC	280	3	85	2098
chr19	+	49497763	49497800	G4550.1	TGGGCACTGCTGAGAAAGCCACTTGGTAAAACTGATGC	190	6	21	1156
chr19	+	49498001	49498040	G4551.1	AGAAGCGCCACAAGAACATGTCTGTACACCTGTCCCCCTG	31	2	2	206	RPS11
chr19	+	49681958	49681979	G4554.1	TTTCATAACCGGCACCTCTTCA	56	4	19	373	PRMT1
chr19	+	49682204	49682249	G4556.1	TTCCAGTATCTCTGATTATGCGGTGAAGATCGTCAAAGCCAACAAG	21	2	4	212	PRMT1
chr19	+	51692793	51692814	G4572.1	TGAGGTAGGAGGTTGTATAGTT	16	2	3	123
chr19	+	55386361	55386401	G4586.1	TCTGCGCATCTGCAATGGATGGTCGTGCGGAACTGCTCCAG	12	2	3	97	RPL28
chr19	+	55386573	55386642	G4587.1	CCCAATAACTTGAAGGCCCGCAATTCCTTCCGCTACAACGGACTGATTCACCGCAAGACTGTGGGCGTGG	63	4	7	349	RPL28
chr19	+	55660195	55660219	G4592.1	CGCTAAAGAGGAGCACGGTGGACTG	13	2	5	34	U2AF2
chr19	+	55669536	55669576	G4597.1	CCTCATGAACATGGTGCTGCCTGAGGAGCTGCTGGACGACG	33	2	3	156	U2AF2
chr19	+	58394526	58394575	G4604.1	TGAGGCTGCCTTCCGGAACATTAAGACCATTGCTGAGTGCCTGGCAGATG	29	4	10	196	RPS5
chr19	+	58547382	58547408	G4612.1	CCAAGTCTCGGGATGGTGAACGTACTG	61	3	5	299	TRIM28
chr19	+	58547463	58547503	G4612.2	ATACTCTCACCTGCCGAGACTGCCAGCTCAATGCCCACAAG	59	2	5	348	TRIM28
chr19	+	58547604	58547632	G4613.1	TTCTTAGAGGATGCAGTGAGGAACCAGCG	14	2	2	64	TRIM28
chr19	+	58548353	58548392	G4617.1	CGAGATGAAGTTTCAGTGGGACCTCAATGCCTGGACCAAG	50	2	2	339	TRIM28
chr19	+	58549140	58549187	G4619.1	TTATTGAACGTGGCGCTGCCGCTGCAGCTACCGGCCAGCCAGGGACTG	67	2	5	333	TRIM28
chr19	-	621172	621201	G4631.1	CTCGGCCCGCACGGCCTGGATTGGCTCAAG	17	2	3	82	POLRMT
chr19	-	1088205	1088235	G4636.1	GTTGTTGTAGGAGGTTGGGTGTTTTCAAATG	24	3	5	269	POLR2E
chr19	-	1089901	1089927	G4639.1	CGGGGGACCCTGTGGCGCGCTACTTTG	21	2	2	124	POLR2E
chr19	-	1611019	1611054	G4650.1	TCCCGTGTCTCTCGCTATTTCTGCTGCTGTTCCTAG	12	2	12	166	TCF3
chr19	-	2102073	2102121	G4659.1	CAGCCCTGACGTGTCTCGCCTCTCCTCAGTCGTGTGTACTGTACCCAAG	18	2	3	220	AP3D1
chr19	-	2428265	2428314	G4664.1	CTGGGGCTGGCATGGACTTTCATTTCAGAGATTCGGTTTTTAAGAAGATG	47	3	3	584	LMNB2
chr19	-	2444470	2444488	G4669.1	TCCTGGATGAGACGGCTCG	14	2	2	46	LMNB2
chr19	-	2761466	2761490	G4673.1	CCTGCTGAACAACCCTGGCTTCATG	12	2	2	65	SGTA
chr19	-	3538395	3538431	G4676.1	GTGACATAATGGGGACAGGGCTGCCTTCTGGGTGATG	18	2	2	144	MFSD12
chr19	-	3976125	3976158	G4681.1	CGGGTAGATGATTTCTAGCAGGCAGGAAGTCCTG	22	2	2	114	EEF2
chr19	-	3976364	3976386	G4682.1	TTTCTTTCAATATTTATTTCCAG	7	2	3	88	EEF2
chr19	-	3976532	3976594	G4683.1	AAGGCATCCCTGCCCTGGACAACTTCCTGGACAAATTGTAGGCGGCCCTTCCTGCAGCGCCTG	96	5	6	667	EEF2
chr19	-	3977290	3977345	G4686.1	TCCAGAGCAGGTGGTCGGTGGCATCTACGGGGTTTTGAACAGGAAGCGGGGCCACG	44	6	10	342	EEF2
chr19	-	3977439	3977480	G4687.1	TGCTGACCGCCCAGCCACGCCTCATGGAGCCCATCTACCTTG	11	2	2	66	EEF2
chr19	-	3977568	3977592	G4688.1	AACATGCGGGGTGTGCGCTTCGACG	75	2	3	352	EEF2
chr19	-	3977923	3977967	G4690.1	AGTGGGACGTGGCTGAGGCCCGCAAGATCTGGTGCTTTGGGCCCG	89	3	3	333	EEF2
chr19	-	3979365	3979412	G4692.1	CATATCATCGCGGGCGCCGGCGAGCTGCACCTGGAGATCTGCCTGAAG	127	5	22	356	EEF2
chr19	-	3979942	3980004	G4694.1	TGGGCCTCGTGGGCGTGGACCAGTTCCTGGTGAAGACGGGCACCATCACCACCTTCGAGCACG	92	3	5	483	EEF2
chr19	-	3980516	3980560	G4695.1	TATACCCCTGGGAAGAAGGAGGACCTCTACCTGAAGCCAATCCAG	15	2	2	77	EEF2
chr19	-	3980585	3980632	G4695.2	TTCTACGCCTTTGGACGAGTCTTCTCGGGGCTGGTCTCCACTGGCCTG	68	5	5	697	EEF2
chr19	-	3981345	3981398	G4697.1	AAACTGGACATCAAACTGGACAGCGAGGACAAGGACAAAGAAGGCAAACCCCTG	85	2	3	185	EEF2
chr19	-	3981428	3981449	G4697.2	TTTGATGCGATCATGAATTTCA	92	3	5	635	EEF2
chr19	-	3982379	3982414	G4701.1	TCCTCGGTACCGTGGGCTTTGGGTCTGGCCTCCACG	31	3	3	249	EEF2
chr19	-	3982537	3982572	G4702.1	ATTCGTGATGACTGATCATTTCTTCACTTTGACCAG	46	4	5	534
chr19	-	3982860	3982904	G4703.1	AGGAGCTCTACCAGACTTTCCAGCGCATCGTGGAGAACGTGAACG	123	4	8	850	EEF2
chr19	-	3983185	3983234	G4704.1	CAAGGACGGTGCCGGCTTCCTCATCAACCTCATTGACTCCCCCGGGCATG	14	2	4	95	EEF2
chr19	-	3984262	3984287	G4707.1	TCTGTCATCGCCCACGTGGACCATGG	84	2	2	502	EEF2
chr19	-	4054668	4054709	G4712.1	CGGCCGCCGCCGCCGCTGCCAGCTTCCCGTGGTCCGCCTTTG	19	2	4	110	ZBTB7A
chr19	-	6414451	6414475	G4737.1	TGGGGACACCATGATCTCTGGATTG	38	2	5	175	KHSRP
chr19	-	6414618	6414647	G4738.1	TTGCAGGCGGCCTGGCTCTGGCAGGGACTG	16	3	19	77	KHSRP
chr19	-	7886975	7886998	G4753.1	GGAATACCGGGTGCTGTAGGCTTG	1928	6	125	11433
chr19	-	10391445	10391481	G4774.1	CCATCTCGCCCGCTCCTGACTTCCTCTACTTGCGCTG	20	3	3	207	CDC37
chr19	-	12643886	12643924	G4783.1	TCGCCATGGGCCGCCGCCCCGCCCGTTGTTACCGGTATT	27	2	2	103	AC010422.3
chr19	-	12703600	12703621	G4786.1	ATGTATTCGTACTGTCTGATGG	22	2	2	187
chr19	-	12706449	12706471	G4787.1	CGTATTCGTACTGGCTGATCCTG	100	2	4	789
chr19	-	12881290	12881319	G4793.1	CTACGGGGACTCCGGGCAGCCTGTAGACTG	16	2	4	76	DNASE2
chr19	-	14514960	14515024	G4812.1	TTTTTATAATTCCATGTATAGTTGGTGTACACTCAAAACCTGTCCCCGGCAGCCAGTGCTCTCTG	17	2	9	182	DNAJB1
chr19	-	14515526	14515557	G4813.1	ATTCCCAGACCCTGTACACTCCTCCTTTTCTG	20	2	3	205	DNAJB1
chr19	-	14772440	14772465	G4816.1	TCATGCGGAAAATTCTCGGACTGCTG	12	2	2	70	ADGRE2
chr19	-	18435435	18435477	G4830.1	CTGCTGGCCGCACCCATCATGCTGGACCTAGCGCTGCTGACCG	18	2	2	128	ISYNA1
chr19	-	19654015	19654048	G4850.1	CCTCGTATGAGAAGCTGGGCTCCACCGACCTCTG	16	2	2	107	ATP13A1
chr19	-	21113125	21113157	G4853.1	ACCACCTGGGAATACCGGGTGCTGTAGGCTTTG	310	4	6	2336	EDA
chr19	-	22694823	22694852	G4854.1	TTGGTGGAGCGATTTGTCTGGTTAATTCCG	575	3	3	5796	AC024563.1
chr19	-	24000279	24000305	G4856.1	TCTGGTATGGTGAAGAGACATGAGAGG	15	2	16	74
chr19	-	24000856	24000888	G4857.1	CCTCTGGCATGTTAGAACAATGTAGGTAAGGGA	299	2	2	1004
chr19	-	24001276	24001350	G4858.1	CCAGGTGCAGATCTTGGTGGTAGTAGCAAATATTCAAATGAGAACTTTGAAGGCCGAAGTGGAGAAGGGTTCCAG	3594	16	89	29421
chr19	-	24001588	24001622	G4859.1	AAAATGTGTTGGTTGATATAGACAGCAGGACGGTG	416	4	9	2744
chr19	-	24001805	24001828	G4860.1	TAAAGCGAATGATTAGGGGTCTTG	62	2	3	420
chr19	-	24001951	24001977	G4861.1	TCTGTAGTGGTCCTGACGTGCAAATCG	47	2	6	201
chr19	-	24002980	24003007	G4866.1	AGTTCAAGAGGGCGTGAAACCGTTAAGA	2916	5	30	13596
chr19	-	24003012	24003039	G4867.1	TAAGGGAAAGTTGAAAAGAACTTTGAAG	1744	6	18	8004
chr19	-	24003197	24003229	G4868.1	CTTGTGGGGGCCCAAGTCCTTCTGATTGAGGCC	374	6	199	2153
chr19	-	39433235	39433276	G4881.1	ATAAGCCCATCGTGACTCAAAACTCACTTGTATAATAAACAG	41	4	29	287	RPS16
chr19	-	39435630	39435654	G4885.1	AACGGGCGGCCCCTGGAGATGATTG	17	2	2	44	RPS16
chr19	-	41564223	41564247	G4892.1	TTTTAAGCAGGAGGTGTCAGAAATG	1389	6	20	8308
chr19	-	45838578	45838613	G4914.1	CCCAACCTGGGGGAGGACGATGAGGACAAAGACTTG	10	2	2	31	SYMPK
chr19	-	46776981	46777011	G4922.1	ACCATATCTCCTTGATCCTGGCTGTGGACTG	20	4	4	167	SLC1A5
chr19	-	48382996	48383031	G4928.1	TTTTTCTTCTACTCTGTGGCCCCAATTTTTATAAAG	35	2	31	500	KDELR1
chr19	-	48615344	48615384	G4931.1	CTACAAAAACTAACCCTGGATCCTACTCTCTTATTAAAAAG	84	3	3	769	RPL18
chr19	-	48616091	48616115	G4932.1	GACTCCCCTAAGGGCTGTGGCACTG	33	2	2	157	RPL18
chr19	-	48617316	48617360	G4934.1	TTTATGAGTCGCACCAACCGGCCGCCTCTGTCCCTTTCCCGGATG	46	5	6	341	RPL18
chr19	-	49719960	49719999	G4943.1	AGCTGAAGCTGATCGGCGAGTATGGGTTCCGGAACAAACG	34	2	27	137
chr19	-	49909436	49909469	G4949.1	CTTTGGGCTGGGCAGCAGCAACCTCACTAATGCC	10	3	5	59	NUP62
chr19	-	50799465	50799529	G4954.1	CCTCCATGATGTCCAGCACTGGGCTCCGACTGCCACTGAGGACACGGTGCCCCCCGGGACCTTTG	450	6	61	3020
chr19	-	50802378	50802415	G4955.1	CTCCCATGATGTCCAGCACTGGGCTCTGATCACCCCTG	98	4	19	690
chr19	-	58498525	58498544	G4975.1	GCTGTGTGTGAGGGAACCTG	15	2	3	72	SLC27A5
chr2	+	9441949	9441971	G4977.1	ATACTGTGTAGAAGGGACACTTG	20	3	3	113	CPSF3
chr2	+	10131092	10131125	G4980.1	ATTGTATAGACAATTTTTAAATCTCTGTAATATG	31	5	13	326	RRM2
chr2	+	11584849	11584885	G4982.1	TTCTGGGCTGTAGTGCGCTATGCCGATCGGGTGTCCG	66	3	7	577
chr2	+	24375792	24375810	G4986.1	CGGGCTCTATGAGTTTGGT	24	2	42	126
chr2	+	26389144	26389181	G4990.1	CTTGTAAATATTTCCTCCATCACCATTGAACTAGACTG	19	2	14	205	SELENOI
chr2	+	27236297	27236323	G5002.1	ACTGGCACTTTGAGGAGGCTGTGGATG	21	2	2	133	CAD
chr2	+	28913709	28913749	G5012.1	TAAAATGAGGACCTACAATTCCTTGGCTGTGTCTGAGCACC	117	3	4	1213	WDR43
chr2	+	38482048	38482106	G5016.1	AGGGCACCTGGAAAACAACCCAGCTCTGGAGAAACTGCTGCCTCATATCTGGGGGAATG	113	5	21	370
chr2	+	38482116	38482139	G5016.2	TGTTCACCAAGGAGGACCTCACTG	38	2	2	151
chr2	+	46967950	46967968	G5024.1	ATCTTCCGTGGGTGCTGCA	188	2	174	954	TTC7A
chr2	+	47373981	47374017	G5026.1	AACACTGCTGGGGTCAGAAGAACAGACAAGGACACTG	19	2	4	68	EPCAM
chr2	+	55235442	55235476	G5038.1	CAAAATTAGTCGCCTTCGTCGAGAGTGCCCTTCTG	11	2	2	102	RPS27A
chr2	+	72760548	72760568	G5057.1	ATCAAATGTCTGACCTGAAAT	73	3	7	430
chr2	+	73240488	73240535	G5058.1	TTGTCCATCCTGCAGCAAAGACTTTGGTAGACATTGCCAAATCCCAAG	18	2	2	178	CCT7
chr2	+	73453078	73453101	G5063.1	TTCCCTCTGGTACTTACTCACATG	10	2	2	88	ALMS1
chr2	+	78701605	78701631	G5070.1	CGGGGAAAGAAGACCCTGTTGAGCTTG	76	2	4	114
chr2	+	78701634	78701695	G5070.2	CTTGACTCTAGTCTGGCACGGTGAAGAGACGTGAGAGGTGTAGAATAAGTGGGAGGCCCCCG	368	7	14	1562
chr2	+	84906504	84906541	G5073.1	CGAGCCACAAGCTGCACTGTGAACCTGGGCACTCCGCG	82	2	3	358	TMSB10
chr2	+	85647973	85648014	G5076.1	ACATCCTTCCCCAGATGATCACACTGTCAGAGGCTTACATTC	20	4	7	186	USP39
chr2	+	98207117	98207157	G5082.1	AATCCCTTCTGCTGTGGGCTATCAGCCTACCCTGGCCACTG	14	3	3	138
chr2	+	98618366	98618408	G5083.1	TAAAACTTGTAAATAAACTATCATCTTTGTAGATATCTTAAAG	69	8	73	822	UNC50
chr2	+	108684603	108684628	G5090.1	CTCTCCTTGTGAATTCTTCCTTCAAA	84	8	99	825	LIMS1
chr2	+	111167017	111167044	G5092.1	ATTGTAAATATTGTAGATTCTTTTTCTG	11	2	11	154	BCL2L11
chr2	+	112577104	112577124	G5093.1	ATCATCTTGTATATACTTCTG	11	2	11	99	POLR1B
chr2	+	112663250	112663300	G5095.1	TCCCCTTTCCTTCTGGGCTGTGAATTCCTGTACATATTTCTCTACTTTTTG	33	3	9	434	SLC20A1
chr2	+	117012444	117012466	G5097.1	ATCGTTTTTTCACTGACCCGGTG	156	6	16	1368
chr2	+	170966236	170966270	G5115.1	CATCCTGTAAATAATTCCAAGGGGAAAACTAAACG	20	2	20	106	GORASP2
chr2	+	181916158	181916194	G5123.1	TCTCAGTCTACCTGTTCCCTTCATTCCATCCACTCTG	26	4	17	240	SSFA2
chr2	+	181922288	181922315	G5127.1	CCCCAGAAGTTGTAGGACCTAAATCTGA	22	2	4	104	SSFA2
chr2	+	191393094	191393117	G5131.1	AGGAAGCAACGCCTGGAGGACTTG	28	2	2	82	MYO1B
chr2	+	197474212	197474233	G5132.1	AAACTGTAAATTTAAACCTTTT	25	4	27	198	COQ10B
chr2	+	197503327	197503365	G5133.1	TCATGTAAATAATTTCCATATTTCTCTTTTATAATAAAC	17	4	18	288	HSPE1
chr2	+	200903842	200903879	G5134.1	TAAAACTGTAATATAACTACCATATTAAATAACAAATG	19	6	18	190	NIF3L1
chr2	+	202291393	202291415	G5138.1	TTCAGTCACTACCTCATCTGATG	121	4	4	838
chr2	+	202293101	202293133	G5139.1	AAGGCATCTTTAGTCACTACCTCTTCTGAGACA	648	10	32	6420
chr2	+	206161882	206161950	G5141.1	TTGCATGATGAATAAAATCAAATCACCATCTTTCGGCTGAGTTCGTGATGGATTTGCTTTTTTCTGATT	91	4	9	1380
chr2	+	216137167	216137195	G5143.1	ACAAAAGAGCTAATCCTCAAGTCGGCGTG	28	3	6	125	XRCC5
chr2	+	216141197	216141240	G5144.1	AATGCTGTTGATGCTTTGATTGACTCCATGAGCTTGGCAAAGAA	21	2	5	181	XRCC5
chr2	+	216190296	216190332	G5147.1	ATAGACTGCATCCGAGCCTTCCGGGAAGAAGCCATTA	11	2	2	75	XRCC5
chr2	+	216205720	216205746	G5150.1	TAAGGACGGACTCACTTCTCTTTTTAG	13	2	8	122	XRCC5
chr2	+	216205761	216205782	G5151.1	TTACCACATTACTCTGCCTCTG	12	2	3	93	XRCC5
chr2	+	218249822	218249857	G5157.1	CCTATATTCACACACGTATGCGGGCGAAAACGTCTG	23	3	4	168	ARPC2
chr2	+	218354411	218354449	G5158.1	ATTGATCGCCACATGTATCACAGCCTGTACCTGAAGGTG	13	2	13	105
chr2	+	227346047	227346082	G5169.1	TTTTTTAATTTTCTGGGACTCTGGGAATAATATCAG	10	2	2	158	MFF
chr2	+	231713177	231713225	G5179.1	ATCTCGGATGACCAAACCAGCCTTCGGAGCGTTCTCTGTCCTACTTCTG	22	4	4	263	PTMA
chr2	+	231713446	231713469	G5180.1	TTGCTGTTTATTTTTTTTGGCCTG	11	2	4	155	PTMA
chr2	+	233275727	233275762	G5182.1	GGTCGATGATGATTGGTAAAAGGTCTGATTGCACTG	29	3	10	289
chr2	+	238233248	238233272	G5190.1	TTTCTCCTGTAATATTTTATCCCTG	14	2	15	167	TARDBP
chr2	+	240435756	240435798	G5192.1	CCGGCTTTTGTTGTCTCCGCCTCCTCGGCCGCCGCCGCCTCTG	73	2	11	509	GPC1
chr2	+	240573851	240573883	G5197.1	AGTGCAGCTGAGCGGCTGTATGGGCCCTACATG	11	2	2	75	RNPEPL1
chr2	-	666834	666871	G5206.1	TCTGGATTTCAGTGGAGCACCCTTCTTCTTTCACCAAG	17	2	4	217
chr2	-	9588209	9588235	G5209.1	CTCTTAACTTTTCTGTATTTTACTATG	47	3	4	483	YWHAQ
chr2	-	38294748	38294782	G5236.1	TTGAGAGCTCTAAGGCATTGTACCTCAAAACTAAG	19	2	20	151
chr2	-	47160668	47160711	G5242.1	TAACTTATCTGTAAAAGGTTTCTCCCTACTGTCAAAAAAATATG	20	3	16	275	CALM2
chr2	-	47280760	47280792	G5244.1	TTTCCGTAGTGTAGTGGTTATCACGTTCGCCTG	181	7	27	2313	AC106869.1
chr2	-	47359732	47359759	G5245.1	CGACATCTGTCACCCCATTGATCGCCAG	47	2	3	279
chr2	-	64875976	64876008	G5269.1	ATCCCAGAAAAGGTGTTGGTTGATATGGACAGC	215	4	9	1500
chr2	-	65311021	65311056	G5271.1	CATAATTCATTCTTTACCTGTATACTAAAAACCCTG	14	2	12	170	SPRED2
chr2	-	70249007	70249044	G5272.1	GTATCATGCAAGATTCCCATTCTTGCGACCCGGGTTCG	95	4	14	987
chr2	-	72176024	72176056	G5275.1	TTATTCCTCTTGTACATTTTCCTCTTTTAACTG	10	5	11	169	EXOC6B
chr2	-	74529405	74529449	G5284.1	TCGGGTTCTGCCTCCTCGTCCTGCGCCTCTTTCTCGGGATCCACG	12	3	3	165	AUP1
chr2	-	76445281	76445306	G5286.1	CTCCATGTGCGTCCCTCCCGAAGCTG	72	2	2	407
chr2	-	76445307	76445355	G5286.2	ATTCGGCTGATCTGGCTGGCTAGGCGGGTGTCCCCTTCCTCCCTCACCG	117	4	4	1357
chr2	-	85341088	85341114	G5292.1	CCTTTATAATTTTACTCACTCACTCTG	11	2	4	128
chr2	-	86504196	86504229	G5296.1	ATTCACTCTGGTGTTGTACATTGTATGGGCTTAG	14	2	15	181	CHMP3
chr2	-	87565707	87565728	G5298.1	TCCTTTCATGTAAATTATTCTG	13	2	11	126
chr2	-	96186663	96186693	G5303.1	CCCTGTCTCAGTCCGTTATCACTCTGCTGTA	18	2	2	188	STARD7
chr2	-	96186874	96186894	G5304.1	AAGCTGCACATGGCCACTCTG	11	2	3	41	STARD7
chr2	-	106698596	106698627	G5331.1	ATTCGGGCAAGTCCACCACTACTGGCCATCTG	45	2	2	263
chr2	-	114937543	114937572	G5336.1	AACTTTGAAGAGAGAGTTCAAGAGGGCGTG	357	3	3	1035
chr2	-	121377541	121377567	G5339.1	TTTAGTTTTCGAAGCCAAGAAGATCTG	10	2	2	88	CLASP1
chr2	-	127770795	127770835	G5348.1	AAAAGCTGTGAACCGAAAAACCATAGACTACAATCCATCTG	11	2	3	62	WDR33
chr2	-	127798967	127798998	G5349.1	GGCTGGTCCGATGGTAGTGGGTTATCAGAACT	141	2	3	1161
chr2	-	132254390	132254433	G5363.1	CGCTGAGAAGACAGTCGAACTTGACTATCTAGAGGAAGTAAAAG	54	2	2	382	ANKRD30BL
chr2	-	132254658	132254700	G5365.1	ATGTCCAGGGCTGCACGCGCGCTACACTGACTGGCTCAGCGTG	228	5	8	1107	ANKRD30BL
chr2	-	132254713	132254785	G5366.1	CGGTCGGCATCCCCCAACTTCTTAGAGGGACAAGTGGCGTTCAGCCACCTGAGATTGAGCAATAACAGGTCTG	102	2	3	640	ANKRD30BL
chr2	-	132255145	132255204	G5370.1	CCAAGAATGTTTTCATTAATCAAGAACGAAAGTCGGAGGTTCGAAGACGATCAGATACCG	9802	10	74	72192	ANKRD30BL
chr2	-	132255267	132255326	G5371.1	TTCTATTTTGTTGGTTTTCGGAACTGAGGCCATGATTAAGAGGGACGGCCGGGGGCATTC	5903	15	111	57968	ANKRD30BL
chr2	-	132278689	132278739	G5375.1	CACGTTCGTGGGGAACCTGGTGCTAAACCATTTGTAGACGACCTGCTTCTG	75	3	27	429
chr2	-	132279144	132279168	G5377.1	TTGGATTGTTCACCCACTAATAGGG	17700	8	317	141070
chr2	-	132279345	132279384	G5378.1	TGGAGCAGAAGGGCAAAAGCTCGCTTGATCGTGATTTTCA	1456	5	66	6241
chr2	-	132279454	132279475	G5380.1	ACAGTGCCAGGTGGGGAGTTTG	594	3	9	2945
chr2	-	132280618	132280641	G5385.1	CTGGCATGTTGGAACAATGTAGGT	294	3	3	1692
chr2	-	132281063	132281117	G5388.1	CAAATGAGAACTTTGAAGGCCGAAGTGGAGAAGGGTTCCATGTGAACAGCAGTTG	112050	9	1607	837516
chr2	-	132281430	132281478	G5389.1	ACCTCAGAAAAGGTGTTGGTTGATATAGACAGCAGGATGGTGGCCATGG	1436	11	148	12048
chr2	-	136200402	136200451	G5392.1	AATTTGGTAAACGCCCTGCAGAAGATATGGAAGAGGAACAAGCATTTAAA	131	3	8	845
chr2	-	148881728	148881748	G5394.1	TTCACCCTCTAAATCACCACG	1436	4	15	7157	AC105402.3
chr2	-	148881771	148881819	G5395.1	ATAGGTTTGGTCCTAGCCTTTCTATTAGCTCTTAGTAAGATTACACATG	211	5	5	3197	AC105402.3
chr2	-	156401185	156401217	G5397.1	GCATTGGTGGTTCAGTGGTAGAATTCTCGCCTG	302	5	9	3313	VAC14
chr2	-	158583967	158583998	G5398.1	TTGGGAACCTGGCGCTAAACCATTTGTAGACG	63	3	51	338
chr2	-	158584225	158584247	G5399.1	AAGCTGCCATCTGTGGGATTATG	29	2	2	201
chr2	-	170993457	170993484	G5400.1	TTTATTTGGGGGAACACTGTAAATAACG	11	2	5	82	TLK1
chr2	-	176201201	176201230	G5405.1	CCTGCATCTACTCGGCCCTCATTCTGCACG	110	3	4	850
chr2	-	182925302	182925332	G5410.1	TGTAAATTATTTCATATAGGGAAGAGTTCTG	13	4	13	143	NCKAP1
chr2	-	190537990	190538019	G5413.1	ATGTGTTGTTGCCATGGTAATCCTGCTCAG	6052	11	149	62303
chr2	-	197400267	197400295	G5416.1	ACTTGATTTCTCGAACTGCTGTTGTCATG	15	2	16	164	SF3B1
chr2	-	197403684	197403730	G5418.1	AATTTGGAGCTGGTCCTTTGTTTAATCAGATTCTTCCTCTGCTGATG	10	4	11	113	SF3B1
chr2	-	199783341	199783374	G5426.1	TATACAACCCCCCACTGCTAAATTTGACTGGCTT	18	3	3	163	FTCDNL1
chr2	-	200853196	200853237	G5427.1	TTATTTTGTACAGCTTTGTAAATTCTTAACATTTTTATATTG	10	3	10	201	CLK1
chr2	-	202346308	202346340	G5429.1	TGGAGCAGAAGGGCAAAAGCTCGCTTGATGTTG	1444	5	20	4088
chr2	-	219539062	219539102	G5439.1	CCTGACGCCAGCCCTGCCTCTGGGCCCTGGGGGCTGGGCTG	7	2	2	44	CHPF
chr2	-	219539115	219539143	G5439.2	ATTCGGGCTGTGGCCTCCACGTATTTATG	36	3	4	336	CHPF
chr2	-	219539212	219539235	G5440.1	TCCCTGGGCTCTGGACAAGCACTG	17	2	2	81	CHPF
chr2	-	219539353	219539372	G5441.1	TCCCCGTGGGCCGTGGCATG	16	2	3	48	CHPF
chr2	-	219539586	219539618	G5443.1	AAGAGGAGCTGCTGGAGAGCCTGGATGTGTACG	72	2	3	301	CHPF
chr2	-	219539658	219539682	G5444.1	GCCTGCTTCTACAACTCCGACTATG	20	2	10	103	CHPF
chr2	-	219540420	219540446	G5448.1	TGGCCGATGTTCTGGGGACAGCTCTAG	15	2	2	98	CHPF
chr2	-	219541742	219541775	G5452.1	CCACGGAGGCTTTGGGGTGCTGCTGTCGCGCATG	45	2	2	298	CHPF
chr2	-	219541923	219541972	G5453.1	CACCTGGCGCTGCGCCACCTGCTGGAGCAGCACGGCGACGACTTTGACTG	50	3	3	192	CHPF
chr2	-	229180857	229180914	G5463.1	AACAGCAGTTGAACACGGGTCAGTCGGTCCTGAGAGATGGGCGAGCGCCGTTCCGAAG	79179	9	597	454049	PID1
chr2	-	229180947	229180975	G5464.1	TTCGCCCCGAGAGAGGGGCCCGTGCCTTG	3402	5	34	9877	PID1
chr2	-	231454902	231454940	G5465.1	TTTCATCCCATGTACAAAACCATTTTTTCCTACAAATAG	11	3	12	142	NCL
chr2	-	231460216	231460275	G5480.1	CTTTCAATCTCTTTGTTGGAAACCTAAACTTTAACAAATCTGCTCCTGAATTAAAAACTG	28	5	16	343	NCL
chr2	-	231460371	231460438	G5481.1	CACAAATGATGAATAACAAAGGGACTTAATACTGAAACCTGATGTTACATTGTAGTGTGCTGATGTGC	173	8	23	1318
chr2	-	231460678	231460737	G5483.1	ACGACGACGAAGATGATGAAGATGATGATGATGAAGATGATGAGGAGGAGGAAGAAGAGG	46	2	4	205	NCL
chr2	-	231463212	231463261	G5488.1	AAGAAGATAGTGAAGATGAGGAAATGTCAGAAGATGAAGAAGATGATAGC	52	2	6	261	NCL
chr2	-	231464378	231464410	G5489.1	CTTGGCTTCTTCTGGACTCATCTGCGCCACTTG	19	4	7	175	NCL
chr2	-	241246761	241246792	G5498.1	AAGCTGCCCGGAGCAGGATTCTGTCTATTCAG	14	2	5	99	HDLBP
chr20	+	2654230	2654253	G5511.1	AATCAAATCTGTCAATCCCCTGAG	117	3	9	687
chr20	+	2654256	2654287	G5512.1	CAATCACTGATGTCTCCATGTCTCTGAGCAAT	199	8	15	1738
chr20	+	2656648	2656693	G5515.1	TCAACAGCAGTTCACCTAGTGAGTGTTGAGACTCTGGGTCTGAGTG	51	3	11	465
chr20	+	2656938	2656970	G5516.1	TTGGAGGTGATGAACTGTCTGAGCCTGACCTTG	344	8	25	2988
chr20	+	2656971	2657012	G5517.1	TAGAATGGAGGCAAAAAAACTGATTTAATGAGCCTGATCCAA	346	8	15	2849
chr20	+	3038299	3038321	G5520.1	CACTGATAGTCCTTTTTCCAATG	21	2	2	187	PTPRA
chr20	+	4024409	4024435	G5527.1	TATCTCTTCGAAAGGCTCACTCTCAAG	36	2	2	271
chr20	+	7718467	7718510	G5532.1	TCATGTAAATAATTTCCATATTTCTCTTTTATAATAAACTAATG	17	3	16	316
chr20	+	17489110	17489133	G5536.1	AGTGCACGTGTTAGGACCTGAAAG	13	2	12	51
chr20	+	32848781	32848803	G5555.1	TAACTGTAAAATACTCCCTTTTG	7	3	4	59	MAPRE1
chr20	+	37184187	37184208	G5569.1	CACTGTCTTCCTGTTGGCCCTG	24	2	3	189	RPN2
chr20	+	37225713	37225751	G5571.1	GGCACATTCATCGCAGACAGCCACCAGAACTTCGCCTTG	10	2	2	52	RPN2
chr20	+	37316513	37316537	G5575.1	TCTGAGGAGGCTGTGACGCCCTATG	10	2	3	57	MANBAL
chr20	+	43713023	43713061	G5584.1	AAAGTCCGGAAGTCTCTGGCTCTTGACATTGTGGATGAG	11	2	2	114	MYBL2
chr20	+	44887685	44887710	G5585.1	CATTTTGCCCATTCGGCTGTGGATAG	25	2	2	223	YWHAB
chr20	+	46768695	46768714	G5594.1	TCCTCATTGACGTTACCTGC	192	3	201	961
chr20	+	49278946	49279023	G5595.1	GTAAATGATGACTTCACTTTTTTCCCCATCAGATCGACAATGCTGACGTCTTATATTTTGCCAGTTAGTTCTGATACA	356	12	30	5222
chr20	+	49280324	49280402	G5596.1	CATATATGATGACTTAGCTTTTTTCCCCGACAGATCGACTATGTTGATCTAACTTTTCTAAGCCAGTTTCTGTCTGATA	461	16	31	6170
chr20	+	49280705	49280765	G5597.1	CTTCTTTCCCCATCAGATCGACCCTGTTGATCTCTACACTATTGGCCAGTTTTGTCTGATG	539	13	32	6038
chr20	+	58909995	58910075	G5610.1	ATCTGCTCGCTGAGAAAGTCCTTGCTGGGAAATCGAAGATTGAGGACTACTTTCCAGAATTTGCTCGCTACACTACTCCTG	19	3	3	207	GNAS
chr20	+	58910710	58910752	G5612.1	CGTCACTACTGCTACCCTCATTTCACCTGCGCTGTGGACACTG	30	3	5	291	GNAS
chr20	+	62708876	62708907	G5626.1	TCCTCGGGGGCCTGGGGAACCGCGCGGTTTGG	20	2	8	84	NTSR1
chr20	+	62761796	62761824	G5633.1	ATCTGGCTGTTGAGTTGACGGGTTCCTTG	18	2	18	180	NTSR1
chr20	-	5100210	5100234	G5656.1	TTTCAAAATGTAAATACTTCCTCTG	17	3	9	141	TMEM230
chr20	-	5115118	5115200	G5657.1	TCACCAAATTTGTACCTCTAAGTACATATGTAGATATTGTTTTCTGTAAATAACCTATTTTTTTCTCTATTCTCTGCAATTTG	1778	33	1827	34239	PCNA
chr20	-	10638867	10638903	G5661.1	TAAATAATTCTTTTTTATTAATCACTGTGTATATTTG	12	6	17	178	JAG1
chr20	-	10639320	10639347	G5662.1	TTTCTGTGGTTGGCTGGGAAATCGAGTG	11	2	12	98	JAG1
chr20	-	17962712	17962747	G5665.1	ACCCATCTCACAAAGATGAGTGGTGAAAATCTGATC	116	2	3	919
chr20	-	17962750	17962786	G5665.2	TAAGAATGGTTGGTGTCAGCAGGGACGGGGCCCTCTG	12	3	3	81
chr20	-	29298510	29298529	G5670.1	AACGAGGAATTCCCAGTAAG	156	2	2	393
chr20	-	29298609	29298685	G5671.1	ATTGAGTAATAACAGGTCTGTGATGCCCTTAGATGTCCGGGGCTGCACGTGCGCTACACTGACTGGCTCAGCGTGTG	6737	12	88	34327
chr20	-	29298757	29298799	G5673.1	TCTGGTTAATTCCGATAACGAACGAGACTCTGGCATGCTAACT	588	6	10	5411
chr20	-	29299111	29299159	G5676.1	AATGTTTTCATTAACCAAGAACGAAAGTCGGAGGTTCGAAGACGATCAG	4142	7	39	14075
chr20	-	29299248	29299296	G5677.1	AACCGCGGTTCTATTTTGTTGGTTTTTGGAACTGAGGCCATGATTAAGA	61	2	8	826
chr20	-	29299463	29299483	G5678.1	CTCGTAGTTGGATCTTGGGAG	842	4	6	5787
chr20	-	29299544	29299609	G5679.1	CCCTGTAATTGGAATGAGTCCACTTTAAATCCTTTAACGAGGATCCATTGGAGGGCAAGTCTGGTG	693	10	19	8750
chr20	-	29299980	29300009	G5682.1	AACTGTGGTAATTCTAGAGCTAATACATGC	9115	8	222	71775
chr20	-	30484966	30485002	G5685.1	CAGGACACATTGATCATTGACACTTCGAATGCACTTG	256	8	91	1908
chr20	-	30486928	30486972	G5691.1	TTTTCATTAATCAAGAATGAAAGTCGGAGGTTCGAAGACAATCAG	38	2	2	256
chr20	-	30487066	30487113	G5692.1	GACTGCGGTTCTATTTTGTTGGTTTCCGGAACTGAGGCCATGATTAAG	178	9	32	1697
chr20	-	30487411	30487469	G5693.1	GGGAGGTAGTGACGAAAAATAACAATACAGGACTCTTTCGAGGCCCTGTAATTGGAATG	3463	7	40	27416
chr20	-	30487530	30487576	G5694.1	ACCACGGGTGACAGGGAATCAGGGTTCGATTCTGGAGAGGGAGCCTG	174	4	8	516
chr20	-	30511953	30511975	G5697.1	CCTCTAAGTCAGAATCCCGCCCA	448	2	4	1785
chr20	-	30512061	30512090	G5698.1	GTGTGTTGTTGCCATGGTAATCCTGCTCAG	1739	8	36	16405
chr20	-	30512147	30512169	G5699.1	TTGGATTGTTCACCCACTAATGG	930	7	25	7396
chr20	-	30512399	30512426	G5701.1	TGTCCTAAGGCGAGCTCAGGGAGGACAG	1277	4	11	2910
chr20	-	30512458	30512479	G5702.1	ACAGTGCCAGGTGGGGAGTTTG	603	5	18	2964
chr20	-	30512801	30512833	G5704.1	ACGTGCATGAATGGATGAATGAGATTCCCACTG	17	2	8	108
chr20	-	30513582	30513646	G5707.1	TCTGGCATGTTGGAACAATGTAGGTAAGGGAAGTCAGCAAGCCGGATCCGTAACTTCGGGATAAG	26108	12	215	123320
chr20	-	30514072	30514114	G5708.1	AGAGCTTTGAAGGCCGAAGTGGAGAAGGGTTCCATGTGAACAG	861	7	29	6256
chr20	-	30514115	30514149	G5708.2	TGCAGATCTTGGTGGTAGTAGCAAATTTTCAAACG	79	5	11	577
chr20	-	30514430	30514479	G5709.1	ATCCCAGAAAAGGTGTTGGTTGATATAGACAGCTGGACGGTGGCCATGGA	685	11	105	6240
chr20	-	30514523	30514543	G5710.1	CAGAACTGGCACTGTGGGATG	30	2	30	90
chr20	-	34291514	34291535	G5721.1	TTAGGCATCCGAGGCATCTCTG	30	2	60	120	AHCY
chr20	-	34292465	34292489	G5722.1	AAACGGACGAGGAGTACCTGTGGTG	24	2	2	72	AHCY
chr20	-	36047644	36047686	G5730.1	TGTATATAGTGTATATAAGCGGACATAGGAGTCCTAATTTACG	53	5	52	425	NORAD
chr20	-	38433862	38433899	G5738.1	CTCCTGTCCCTTTCAAACTCTGGAGCTTTCTCACACCT	62	2	2	790	SNHG17
chr20	-	44942474	44942498	G5741.1	AATGGTTGTCCTTGACTCTGTGCTG	24	2	2	238	TOMM34
chr20	-	49634587	49634615	G5755.1	CTGGGATTATGGGCGGGTGTGAGCCATTG	11	2	5	83	B4GALT5
chr20	-	63195845	63195886	G5775.1	TAGGATCTGGTAGTACAGACAGTGTGATGGATGATGCTGCTG	15	2	16	164	YTHDF1
chr21	+	8196246	8196287	G5789.1	CCAATGGGGTGAAGCTACCATCTGTGGGATTATGACTGAACG	445	8	18	4169
chr21	+	8206412	8206448	G5790.1	CTTCGTGATCGATGTGGTGACGTCGTGCTCTCCCGGG	43	6	8	436	FP671120.1
chr21	+	8209631	8209671	G5797.1	TACCTGGTTGATCCTGCCAGTAGCATATGCTTGTCTCAAAG	339	9	12	2932	FP671120.1
chr21	+	8209672	8209830	G5797.2	ATTAAGCCATGCATGTCTAAGTACGCACGGCCGGTACAGTGAAACTGCGAATGGCTCATTAAATCAGTTATGGTTCCTTTGGTCGCTCGCTCCTCTCCTACTTGGATAACTGTGGTAATTCTAGAGCTAATACATGCCGACGGGCGCTGACCCCCTTCG	31353	42	2247	394802	FP671120.1
chr21	+	8209872	8210143	G5797.3	TCAGCCCCTCTCCGGCCCCGGCCGGGGGGCGGGCGCCGGCGGCTTTGGTGACTCTAGATAACCTCGGGCCGATCGCACGCCCCCCGTGGCGGCGACGACCCATTCGAACGTCTGCCCTATCAACTTTCGATGGTAGTCGCCGTGCCTACCATGGTGACCACGGGTGACGGGGAATCAGGGTTCGATTCCGGAGAGGGAGCCTGAGAAACGGCTACCACATCCAAGGAAGGCAGCAGGCGCGCAAATTACCCACTCCCGACCCGGGGAGGTAG	43111	38	1164	209904
chr21	+	8210175	8210320	G5797.4	AGGCCCTGTAATTGGAATGAGTCCACTTTAAATCCTTTAACGAGGATCCATTGGAGGGCAAGTCTGGTGCCAGCAGCCGCGGTAATTCCAGCTCCAATAGCGTATATTAAAGTTGCTGCAGTTAAAAAGCTCGTAGTTGGATCTTG	14623	29	438	106904	FP671120.1
chr21	+	8210352	8210402	G5797.5	CCACCGCCCGTCCCCGCCCCTTGCCTCTCGGCGCCCCCTCGATGCTCTTAG	748	8	40	5034	FP671120.1
chr21	+	8210403	8210447	G5797.6	CTGAGTGTCCCGCGGGGCCCGAAGCGTTTACTTTGAAAAAATTAG	1646	11	149	14496	FP671120.1
chr21	+	8210448	8211197	G5797.7	AGTGTTCAAAGCAGGCCCGAGCCGCCTGGATACCGCAGCTAGGAATAATGGAATAGGACCGCGGTTCTATTTTGTTGGTTTTCGGAACTGAGGCCATGATTAAGAGGGACGGCCGGGGGCATTCGTATTGCGCCGCTAGAGGTGAAATTCTTGGACCGGCGCAAGACGGACCAGAGCGAAAGCATTTGCCAAGAATGTTTTCATTAATCAAGAACGAAAGTCGGAGGTTCGAAGACGATCAGATACCGTCGTAGTTCCGACCATAAACGATGCCGACCGGCGATGCGGCGGCGTTATTCCCATGACCCGCCGGGCAGCTTCCGGGAAACCAAAGTCTTTGGGTTCCGGGGGGAGTATGGTTGCAAAGCTGAAACTTAAAGGAATTGACGGAAGGGCACC…	72448	158	3708	517233
chr21	+	8211198	8211479	G5797.8	CAGGCGCGGGTAACCCGTTGAACCCCATTCGTGATGGGGATCGGGGATTGCAATTATTCCCCATGAACGAGGAATTCCCAGTAAGTGCGGGTCATAAGCTTGCGTTGATTAAGTCCCTGCCCTTTGTACACACCGCCCGTCGCTACTACCGATTGGATGGTTTAGTGAGGCCCTCGGATCGGCCCCGCCGGGGTCGGCCCACGGCCCTGGCGGAGCGCTGAGAAGACGGTCGAACTTGACTATCTAGAGGAAGTAAAAGTCGTAACAAGGTTTCCGTAGGTG	39045	56	1370	271180
chr21	+	8212564	8212727	G5800.1	CCTCGTACGACTCTTAGCGGTGGATCACTCGGCTCGTGCGTCGATGAAGAACGCAGCTAGCTGCGAGAATTAATGTGAATTGCAGGACACATTGATCATCGACACTTCGAACGCACTTGCGGCCCCGGGTTCCTCCCGGGGCTACGCCTGTCTGAGCGTCGCTT	191506	37	7853	1782862	FP671120.1
chr21	+	8213073	8213145	G5803.1	CCGCGCGCGGCTCGGGGTTCGGGGTTCGTCGGCCCCGGCCGGGTGGAAGGTCCCGTGCCCGTCGTCGTCGTCG	30	3	4	177	FP671120.1
chr21	+	8213755	8213779	G5806.1	CCCTCGGCCGCGGCTCTCTCTCCCG	56	2	2	277	FP671120.1
chr21	+	8213880	8214128	G5807.1	CTCCGAGACGCGACCTCAGATCAGACGTGGCGACCCGCTGAATTTAAGCATATTAGTCAGCGGAGGAAAAGAAACTAACCAGGATTCCCTCAGTAACGGCGAGTGAACAGGGAAGAGCCCAGCGCCGAATCCCCGCCCCGCGGCGGGGCGCGGGACATGTGGCGTACGGAAGACCCGCTCCCCGGCGCCGCTCGTGGGGGGCCCAAGTCCTTCTGATCGAGGCCCAGCCCGTGGACGGTGTGAGGCCGG	203885	33	5935	1304863	FP671120.1
chr21	+	8214130	8214184	G5807.2	AGCGGCCCCCGGCGCGCCGGGCCCGGGTCTTCCCGGAGTCGGGTTGCTTGGGAAT	761	7	34	5323	FP671120.1
chr21	+	8214186	8214243	G5807.3	CAGCCCAAAGCGGGTGGTAAACTCCATCTAAGGCTAAATACCGGCACGAGACCGATAG	899	2	2	1622	FP671120.1
chr21	+	8214291	8214428	G5807.4	TTCAAGAGGGCGTGAAACCGTTAAGAGGTAAACGGGTGGGGTCCGCGCAGTCCGCCCGGAGGATTCAACCCGGCGGCGGGTCCGGCCGTGTCGGCGGCCCGGCGGATCTTTCCCGCCCCCCGTTCCTCCCGACCCCTC	21074	18	380	98934	FP671120.1
chr21	+	8214572	8214676	G5808.1	CATTTCCACCGCGGCGGTGCGCCGCGACCGGCTCCGGGACGGCTGGGAAGGCCCGGCGGGGAAGGTGGCTCGGGGGGCCCCGTCCGTCCGTCCGTCCGTCCTCCT	8026	10	383	44653	FP671120.1
chr21	+	8214852	8214901	G5808.2	TCGCCGCGCTCTCCCCCCTCCCGGCGCCCACCCCCGCGGGGAATCCCCCG	1595	3	12	3357	FP671120.1
chr21	+	8214906	8214935	G5809.1	GGGGGTCTCCCCCGCGGGGGCGCGCCGGCG	630	2	9	1224	FP236383.1
chr21	+	8214936	8215016	G5809.2	TCTCCTCGTGGGGGGGCCGGGCCACCCCTCCCACGGCGCGACCGCTCTCCCACCCCTCCTCCCCGCGCCCCCGCCCCGGCG	379	7	17	1181	FP671120.1
chr21	+	8215029	8215147	G5809.3	CCGCGCGCGGGTCGGGGGGCGGGGCGGACTGTCCCCAGTGCGCCCCGGGCGGGTCGCGCCGTCGGGCCCGGGGGGAGGTTCTCTCGGGGCCACGCGCGCGTCCCCCGAAGAGGGGGACG	6570	11	224	15568	FP671120.1
chr21	+	8215154	8215290	G5809.4	CGAGCGCACGGGGTCGGCGGCGACGTCGGCTACCCACCCGACCCGTCTTGAAACACGGACCAAGGAGTCTAACACGTGCGCGAGTCGGGGGCTCGCACGAAAGCCGCCGTGGCGCAATGAAGGTGAAGGCCGGCGCG	23920	14	397	90425	FP671120.1
chr21	+	8215291	8215326	G5809.5	CTCGCCGGCCGAGGTGGGATCCCGAGGCCTCTCCAG	1160	5	23	4902	FP236383.1
chr21	+	8215327	8215364	G5809.6	TCCGCCGAGGGCGCACCACCGGCCCGTCTCGCCCGCCG	3847	3	75	11061	FP236383.1
chr21	+	8215365	8215466	G5809.7	CGCCGGGGAGGTGGAGCACGAGCGCACGTGTTAGGACCCGAAAGATGGTGAACTATGCCTGGGCAGGGCGAAGCCAGAGGAAACTCTGGTGGAGGTCCGTAG	24435	14	733	116893	FP671120.1
chr21	+	8215553	8216050	G5809.8	TTTCCCTCAGGATAGCTGGCGCTCTCGCAGACCCGACGCACCCCCGCCACGCAGTTTTATCCGGTAAAGCGAATGATTAGAGGTCTTGGGGCCGAAACGATCTCAACCTATTCTCAAACTTTAAATGGGTAAGAAGCCCGGCTCGCTGGCGTGGAGCCGGGCGTGGAATGCGAGTGCCTAGTGGGCCACTTTTGGTAAGCAGAACTGGCGCTGCGGGATGAACCGAACGCCGGGTTAAGGCGCCCGATGCCGACGCTCATCAGACCCCAGAAAAGGTGTTGGTTGATATAGACAGCAGGACGGTGGCCATGGAAGTCGGAATCCGCTAAGGAGTGTGTAACAACTCACCTGCCGAATCAACTAGCCCTGAAAATGGATGGCGCTGGAGCGTCGGGCCCA…	236908	83	11600	2058297
chr21	+	8216139	8216347	G5810.1	ACGCTACGCCGCGACGAGTAGGAGGGCCGCTGCGGTGAGCCTTGAAGCCTAGGGCGCGGGCCCGGGTGGAGCCGCCGCAGGTGCAGATCTTGGTGGTAGTAGCAAATATTCAAACGAGAACTTTGAAGGCCGAAGTGGAGAAGGGTTCCATGTGAACAGCAGTTGAACATGGGTCAGTCGGTCCTGAGAGATGGGCGAGCGCCGTTCTG	159999	35	4487	1057266	FP671120.1
chr21	+	8216441	8216618	G5810.2	AGGCGTCCAGTGCGGTAACGCGACCGATCCCGGAGAAGCCGGCGGGAGCCCCGGGGAGAGTTCTCTTTTCTTTGTGAAGGGCAGGGCGCCCTGGAATGGGTTCGCCCCGAGAGAGGGGCCCGTGCCTTGGAAAGCGTCGCGGTTCCGGCGGCGTCCGGTGAGCTCTCGCTGGCCCTTG	44450	30	2525	351372	FP671120.1
chr21	+	8216619	8216806	G5810.3	AAAATCCGGGGGAGAGGGTGTAAATCTCGCGCCGGGCCGTACCCATATCCGCAGCAGGTCTCCAAGGTGAACAGCCTCTGGCATGTTGGAACAATGTAGGTAAGGGAAGTCGGCAAGCCGGATCCGTAACTTCGGGATAAGGATTGGCTCTAAGGGCTGGGTCGGTCGGGCTGGGGCGCGAAGCGGGG	55104	33	1417	387025	FP671120.1
chr21	+	8216898	8216979	G5810.4	CGCCGCTCGCTCCCTCCCCACCCCGCGCCCTCTCTCTCTCTCTCTCCCCCGCTCCCCGTCCTCCCCCCTCCCCGGGGGAGCG	582	10	29	3562	FP671120.1
chr21	+	8217101	8217158	G5810.5	CGGCGGCGGCGGCGACTCTGGACGCGAGCCGGGCCCTTCCCGTGGATCGCCCCAGCTG	254	2	5	864	FP671120.1
chr21	+	8217274	8217304	G5811.1	CGGTCGGCGGGCGGCGGGGCGGGGCGGTTCG	809	2	12	1416	FP671120.1
chr21	+	8217343	8217382	G5812.1	TTCCCCCCTCCTCCTCGGCGCGCGGCGGCGGCGGCGGGCG	143	3	3	193	FP671120.1
chr21	+	8217436	8217729	G5812.2	TTCCGCGCGGCGCCTCGCCTCGGCCGGCGCCTAGCAGCCGACTTAGAACTGGTGCGGACCAGGGGAATCCGACTGTTTAATTAAAACAAAGCATCGCGAAGGCCCGCGGCGGGTGTTGACGCGATGTGATTTCTGCCCAGTGCTCTGAATGTCAAAGTGAAGAAATTCAATGAAGCGCGGGTAAACGGCGGGAGTAACTATGACTCTCTTAAGGTAGCCAAATGCCTCGTCATCTAATTAGTGACGCGCATGAATGGATGAACGAGATTCCCACTGTCCCTACCTACTATCCAG	551714	57	28493	5135556
chr21	+	8217732	8217872	G5812.3	AAACCACAGCCAAGGGAACGGGCTTGGCGGAATCAGCGGGGAAAGAAGACCCTGTTGAGCTTGACTCTAGTCTGGCACGGTGAAGAGACATGAGAGGTGTAGAATAAGTGGGAGGCCCCCGGCGCCCCCCCGGTGTCCCCG	29639	20	971	145168	FP671120.1
chr21	+	8217875	8218013	G5812.4	AGGGGCCCGGGGCGGGGTCCGCCGGCCCTGCGGGCCGCCGGTGAAATACCACTACTCTGATCGTTTTTTCACTGACCCGGTGAGGCGGGGGGGCGAGCCCCGAGGGGCTCTCGCTTCTGGCGCCAAGCGCCCGGCCGCG	45826	20	1098	245352	FP671120.1
chr21	+	8218014	8218690	G5812.5	CGCCGGCCGGGCGCGACCCGCTCCGGGGACAGTGCCAGGTGGGGAGTTTGACTGGGGCGGTACACCTGTCAAACGGTAACGCAGGTGTCCTAAGGCGAGCTCAGGGAGGACAGAAACCTCCCGTGGAGCAGAAGGGCAAAAGCTCGCTTGATCTTGATTTTCAGTACGAATACAGACCGTGAAAGCGGGGCCTCACGATCCTTCTGACCTTTTGGGTTTTAAGCAGGAGGTGTCAGAAAAGTTACCACAGGGATAACTGGCTTGTGGCGGCCAAGCGTTCATAGCGACGTCGCTTTTTGATCCTTCGATGTCGGCTCTTCCTATCATTGTGAAGCAGAATTCACCAAGCGTTGGATTGTTCACCCACTAATAGGGAACGTGAGCTGGGTTTAGACCGTC…	544593	146	26054	3444543
chr21	+	8218735	8218778	G5812.6	TCCGGTGCGGAGTGCCCTTCGTCCTGGGAAACGGGGCGCGGCTG	2202	5	23	7270	FP671120.1
chr21	+	8218803	8218940	G5812.7	TCACGCACCGCACGTTCGTGGGGAACCTGGCGCTAAACCATTCGTAGACGACCTGCTTCTGGGTCGGGGTTTCGTACGTAGCAGAGCAGCTCCCTCGCTGCGATCTATTGAAAGTCAGCCCTCGACACAAGGGTTTGT	29612	31	1317	231458	FP671120.1
chr21	+	8250621	8250664	G5813.1	CTTCGTGATCGATGTGGTGACGTCGTGCTCTCCCGGGCCGGGTC	48	5	9	522
chr21	+	8251656	8251693	G5817.1	ATCCCCCGGGCCGCCGCCTCTGTCTCTGCCTCCGTTAT	39	5	6	261
chr21	+	8253842	8253897	G5821.1	TACCTGGTTGATCCTGCCAGTAGCATATGCTTGTCTCAAAGATTAAGCCATGCATG	333	11	17	3320
chr21	+	8253904	8254040	G5822.1	TACGCACGGCCGGTACAGTGAACTGCGAATGGCTCATTAAATCAGTTATGGTTCCTTTGGTCGCTCGCTCCTCTCCTACTTGGATAACTGTGGTAATTCTAGAGCTAATACATGCCGACGGGCGCTGACCCCCTTCG	29366	36	2123	380516
chr21	+	8254041	8254065	G5822.2	CGGGGGGGATGCGTGCATTTATCAG	231	3	4	1307
chr21	+	8254082	8254306	G5822.3	TCAGCCCCTCTCCGGCCCCGGCCGGGGGGCGGGCGCCGGCGGCTTTGGTGACTCTAGATAACCTCGGGCCGATCGCACGCCCCCCGTGGCGGCGACGACCCATTCGAACGTCTGCCCTATCAACTTTCGATGGTAGTCGCCGTGCCTACCATGGTGACCACGGGTGACGGGGAATCAGGGTTCGATTCCGGAGAGGGAGCCTGAGAAACGGCTACCACATCCAAG	39415	33	1069	203871
chr21	+	8254340	8254384	G5823.1	ACCCGGGGAGGTAGTGACGAAAAATAACAATACAGGACTCTTTCA	776	4	11	2972
chr21	+	8254404	8254522	G5824.1	TCCACTTTAAATCCTTTAACGAGGATCCATTGGAGGGCAAGTCTGGTGCCAGCAGCCGCGGTAATTCCAGCTCCAATAGCGTATATTAAAGTTGCTGCAGTTAAAAAGCTCGTAGTTGG	14282	20	265	64519
chr21	+	8254556	8254610	G5824.2	CGAGCCACCGCCCGTCCCCGCCCCTTGCCTCTCGGCGCCCCCTCGATGCTCTTAG	790	8	45	5277
chr21	+	8254611	8254655	G5824.3	CTGAGTGTCCCGCGGGGCCCGAAGCGTTTACTTTGAAAAAATTAG	1686	9	159	14732	FP671120.1
chr21	+	8254656	8255249	G5824.4	AGTGTTCAAAGCAGGCCCGAGCCGCCTGGATACCGCAGCTAGGAATAATGGAATAGGACCGCGGTTCTATTTTGTTGGTTTTCGGAACTGAGGCCATGATTAAGAGGGACGGCCGGGGGCATTCGTATTGCGCCGCTAGAGGTGAAATTCTTGGACCGGCGCAAGACGGACCAGAGCGAAAGCATTTGCCAAGAATGTTTTCATTAATCAAGAACGAAAGTCGGAGGTTCGAAGACGATCAGATACCGTCGTAGTTCCGACCATAAACGATGCCGACCGGCGATGCGGCGGCGTTATTCCCATGACCCGCCGGGCAGCTTCCGGGAAACCAAAGTCTTTGGGTTCCGGGGGGAGTATGGTTGCAAAGCTGAAACTTAAAGGAATTGACGGAAGGGCACC…	44917	129	2330	346383
chr21	+	8255287	8255406	G5824.5	AGGGACAAGTGGCGTTCAGCCACCCGAGATTGAGCAATAACAGGTCTGTGATGCCCTTAGATGTCCGGGGCTGCACGCGCGCTACACTGACTGGCTCAGCGTGTGCCTACCCTACGCCGG	26784	23	1386	164158
chr21	+	8255423	8255564	G5825.1	TTGAACCCCATTCGTGATGGGGATCGGGGATTGCAATTATTCCCCATGAACGAGGAATTCCCAGTAAGTGCGGGTCATAAGCTTGCGTTGATTAAGTCCCTGCCCTTTGTACACACCGCCCGTCGCTACTACCGATTGGATG	17965	31	530	119818
chr21	+	8255618	8255684	G5826.1	CGCTGAGAAGACGGTCGAACTTGACTATCTAGAGGAAGTAAAAGTCGTAACAAGGTTTCCGTAGGTG	12834	15	491	92784
chr21	+	8256661	8256694	G5827.1	TCTGGCCGGCCTGAGGCAACCCCCTCTCCTCTTG	14	2	3	98
chr21	+	8256772	8256936	G5828.1	ACCTCGTACGACTCTTAGCGGTGGATCACTCGGCTCGTGCGTCGATGAAGAACGCAGCTAGCTGCGAGAATTAATGTGAATTGCAGGACACATTGATCATCGACACTTCGAACGCACTTGCGGCCCCGGGTTCCTCCCGGGGCTACGCCTGTCTGAGCGTCGCTT	191463	37	7871	1781457	FP236383.1
chr21	+	8258072	8258156	G5834.1	TCCGTCCGTCCGCCGAGCGGCCCGTCCCCCTCCGAGACGCGACCTCAGATCAGACGTGGCGACCCGCTGAATTTAAGCATATTAG	147308	11	4681	998801
chr21	+	8258200	8258348	G5834.2	CGAGTGAACAGGGAAGAGCCCAGCGCCGAATCCCCGCCCCGCGGCGGGGCGCGGGACATGTGGCGTACGGAAGACCCGCTCCCCGGCGCCGCTCGTGGGGGGCCCAAGTCCTTCTGATCGAGGCCCAGCCCGTGGACGGTGTGAGGCCG	16643	16	467	75268
chr21	+	8258350	8258401	G5834.3	TAGCGGCCCCCGGCGCGCCGGGCCCGGGTCTTCCCGGAGTCGGGTTGCTTGG	628	7	44	4657
chr21	+	8258403	8258558	G5834.4	AATGCAGCCCAAAGCGGGTGGTAAACTCCATCTAAGGCTAAATACCGGCACGAGACCGATAGTCAACAAGTACCGTAAGGGAAAGTTGAAAAGAACTTTGAAGAGAGAGTTCAAGAGGGCGTGAAACCGTTAAGAGGTAAACGGGTGGGGTCCGCG	25058	21	461	125118
chr21	+	8258795	8258892	G5838.1	CATTTCCACCGCGGCGGTGCGCCGCGACCGGCTCCGGGACGGCTGGGAAGGCCCGGCGGGGAAGGTGGCTCGGGGGGCCCCGTCCGTCCGTCCGTCCG	7768	8	428	43350
chr21	+	8259135	8259229	G5838.2	GGGGGTCTCCCCCGCGGGGGCGCGCCGGCGTCTCCTCGTGGGGGGGCCGGGCCACCCCTCCCACGGCGCGACCGCTCTCCCACCCCTCCTCCCCG	911	7	15	2239
chr21	+	8259307	8259367	G5839.1	CGGGTCGCGCCGTCGGGCCCGGGGGGAGGTTCTCTCGGGGCCACGCGCGCGTCCCCCGAAG	1991	7	39	6698
chr21	+	8259381	8259432	G5839.2	AGCGAGCGCACGGGGTCGGCGGCGACGTCGGCTACCCACCCGACCCGTCTTG	2165	6	111	9856	FP236383.1
chr21	+	8259433	8259519	G5839.3	AAACACGGACCAAGGAGTCTAACACGTGCGCGAGTCGGGGGCTCGCACGAAAGCCGCCGTGGCGCAATGAAGGTGAAGGCCGGCGCG	21923	8	314	80859	FP236383.1
chr21	+	8259520	8259744	G5839.4	CTCGCCGGCCGAGGTGGGATCCCGAGGCCTCTCCAGTCCGCCGAGGGCGCACCACCGGCCCGTCTCGCCCGCCGCGCCGGGGAGGTGGAGCACGAGCGCACGTGTTAGGACCCGAAAGATGGTGAACTATGCCTGGGCAGGGCGAAGCCAGAGGAAACTCTGGTGGAGGTCCGTAGCGGTCCTGACGTGCAAATCGGTCGTCCGACCTGGGTATAGGGGCGAAAG	91254	31	2221	532434
chr21	+	8259820	8260254	G5839.5	CACCCCCGCCACGCAGTTTTATCCGGTAAAGCGAATGATTAGAGGTCTTGGGGCCGAAACGATCTCAACCTATTCTCAAACTTTAAATGGGTAAGAAGCCCGGCTCGCTGGCGTGGAGCCGGGCGTGGAATGCGAGTGCCTAGTGGGCCACTTTTGGTAAGCAGAACTGGCGCTGCGGGATGAACCGAACGCCGGGTTAAGGCGCCCGATGCCGACGCTCATCAGACCCCAGAAAAGGTGTTGGTTGATATAGACAGCAGGACGGTGGCCATGGAAGTCGGAATCCGCTAAGGAGTGTGTAACAACTCACCTGCCGAATCAACTAGCCCTGAAAATGGATGGCGCTGGAGCGTCGGGCCCATACCCGGCCGTCGCCGGCAGTCGAGAGTGGACGGGAGC…	229569	76	11492	2011092
chr21	+	8260315	8260633	G5840.1	CCTCCTCCCCTCCTCCCGCCCACGCCCCGCTCCCCGCCCCCGGAGCCCCGCGGACGCTACGCCGCGACGAGTAGGAGGGCCGCTGCGGTGAGCCTTGAAGCCTAGGGCGCGGGCCCGGGTGGAGCCGCCGCAGGTGCAGATCTTGGTGGTAGTAGCAAATATTCAAACGAGAACTTTGAAGGCCGAAGTGGAGAAGGGTTCCATGTGAACAGCAGTTGAACATGGGTCAGTCGGTCCTGAGAGATGGGCGAGCGCCGTTCCGAAGGGACGGGCGATGGCCTCCGTTGCCCTCGGCCGATCGAAAGGGAGTCGGGTTCAG	175766	47	4975	1158497
chr21	+	8260705	8260971	G5840.2	AAGCCGGCGGGAGCCCCGGGGAGAGTTCTCTTTTCTTTGTGAAGGGCAGGGCGCCCTGGAATGGGTTCGCCCCGAGAGAGGGGCCCGTGCCTTGGAAAGCGTCGCGGTTCCGGCGGCGTCCGGTGAGCTCTCGCTGGCCCTTGAAAATCCGGGGGAGAGGGTGTAAATCTCGCGCCGGGCCGTACCCATATCCGCAGCAGGTCTCCAAGGTGAACAGCCTCTGGCATGTTGGAACAATGTAGGTAAGGGAAGTCGGCAAGCCGGATC	67199	46	3099	516887
chr21	+	8379291	8379332	G5841.1	CCAATGGGGTGAAGCTACCATCTGTGGGATTATGACTGAACG	488	8	21	4548
chr21	+	8389459	8389500	G5842.1	CTTCGTGATCGATGTGGTGACGTCGTGCTCTCCCGGGCCGGG	55	3	7	552	FP236383.1
chr21	+	8389729	8389768	G5845.1	CCTCCAGTGGTTGTCGACTTGCGGGCGGCCCCCCTCCGCG	10	3	3	74	FP236383.1
chr21	+	8392628	8392865	G5850.1	TCCGGCCGCGTCGGGGCCTCGCCGCGCTCTACCTTACCTACCTGGTTGATCCTGCCAGTAGCATATGCTTGTCTCAAAGATTAAGCCATGCATGTCTAAGTACGCACGGCCGGTACAGTGAAACTGCGAATGGCTCATTAAATCAGTTATGGTTCCTTTGGTCGCTCGCTCCTCTCCTACTTGGATAACTGTGGTAATTCTAGAGCTAATACATGCCGACGGGCGCTGACCCCCTTCG	31441	50	2246	396884	FP236383.1
chr21	+	8392907	8392953	G5850.2	TCAGCCCCTCTCCGGCCCCGGCCGGGGGGCGGGCGCCGGCGGCTTTG	722	3	10	2158	FP236383.1
chr21	+	8392957	8393131	G5850.3	ACTCTAGATAACCTCGGGCCGATCGCACGCCCCCCGTGGCGGCGACGACCCATTCGAACGTCTGCCCTATCAACTTTCGATGGTAGTCGCCGTGCCTACCATGGTGACCACGGGTGACGGGGAATCAGGGTTCGATTCCGGAGAGGGAGCCTGAGAAACGGCTACCACATCCAAG	39956	31	995	184760	FP236383.1
chr21	+	8393133	8393355	G5850.4	AAGGCAGCAGGCGCGCAAATTACCCACTCCCGACCCGGGGAGGTAGTGACGAAAAATAACAATACAGGACTCTTTCGAGGCCCTGTAATTGGAATGAGTCCACTTTAAATCCTTTAACGAGGATCCATTGGAGGGCAAGTCTGGTGCCAGCAGCCGCGGTAATTCCAGCTCCAATAGCGTATATTAAAGTTGCTGCAGTTAAAAAGCTCGTAGTTGGATCTTG	18462	39	537	127793	FP236383.1
chr21	+	8393382	8393437	G5850.5	GCGAGCCACCGCCCGTCCCCGCCCCTTGCCTCTCGGCGCCCCCTCGATGCTCTTAG	771	9	51	5180	FP236383.1
chr21	+	8393438	8393816	G5850.6	CTGAGTGTCCCGCGGGGCCCGAAGCGTTTACTTTGAAAAAATTAGAGTGTTCAAAGCAGGCCCGAGCCGCCTGGATACCGCAGCTAGGAATAATGGAATAGGACCGCGGTTCTATTTTGTTGGTTTTCGGAACTGAGGCCATGATTAAGAGGGACGGCCGGGGGCATTCGTATTGCGCCGCTAGAGGTGAAATTCTTGGACCGGCGCAAGACGGACCAGAGCGAAAGCATTTGCCAAGAATGTTTTCATTAATCAAGAACGAAAGTCGGAGGTTCGAAGACGATCAGATACCGTCGTAGTTCCGACCATAAACGATGCCGACCGGCGATGCGGCGGCGTTATTCCCATGACCCGCCGGGCAGCTTCCGGGAAACCAAAG	25924	74	1200	174368
chr21	+	8393817	8394297	G5850.7	TCTTTGGGTTCCGGGGGGAGTATGGTTGCAAAGCTGAAACTTAAAGGAATTGACGGAAGGGCACCACCAGGAGTGGAGCCTGCGGCTTAATTTGACTCAACACGGGAAACCTCACCCGGCCCGGACACGGACAGGATTGACAGATTGATAGCTCTTTCTCGATTCCGTGGGTGGTGGTGCATGGCCGTTCTTAGTTGGTGGAGCGATTTGTCTGGTTAATTCCGATAACGAACGAGACTCTGGCATGCTAACTAGTTACGCGACCCCCGAGCGGTCGGCGTCCCCCAACTTCTTAGAGGGACAAGTGGCGTTCAGCCACCCGAGATTGAGCAATAACAGGTCTGTGATGCCCTTAGATGTCCGGGGCTGCACGCGCGCTACACTGACTGGCTCAGCGTG…	50235	105	2760	369128
chr21	+	8394298	8394514	G5850.8	AACGAGGAATTCCCAGTAAGTGCGGGTCATAAGCTTGCGTTGATTAAGTCCCTGCCCTTTGTACACACCGCCCGTCGCTACTACCGATTGGATGGTTTAGTGAGGCCCTCGGATCGGCCCCGCCGGGGTCGGCCCACGGCCCTGGCGGAGCGCTGAGAAGACGGTCGAACTTGACTATCTAGAGGAAGTAAAAGTCGTAACAAGGTTTCCGTAGGTG	36373	44	1292	253148	FP236383.1
chr21	+	8395598	8395762	G5853.1	ACCTCGTACGACTCTTAGCGGTGGATCACTCGGCTCGTGCGTCGATGAAGAACGCAGCTAGCTGCGAGAATTAATGTGAATTGCAGGACACATTGATCATCGACACTTCGAACGCACTTGCGGCCCCGGGTTCCTCCCGGGGCTACGCCTGTCTGAGCGTCGCTT	191698	37	7937	1783621	FP236383.1
chr21	+	8396843	8396880	G5859.1	TCTCCCGACGGAGCGTCGGGCGGGCGGTCGGGCCGGCG	112	2	2	390	FP236383.1
chr21	+	8396919	8397218	G5859.2	TCCGAGACGCGACCTCAGATCAGACGTGGCGACCCGCTGAATTTAAGCATATTAGTCAGCGGAGGAAAAGAAACTAACCAGGATTCCCTCAGTAACGGCGAGTGAACAGGGAAGAGCCCAGCGCCGAATCCCCGCCCCGCGGCGGGGCGCGGGACATGTGGCGTACGGAAGACCCGCTCCCCGGCGCCGCTCGTGGGGGGCCCAAGTCCTTCTGATCGAGGCCCAGCCCGTGGACGGTGTGAGGCCGGTAGCGGCCCCCGGCGCGCCGGGCCCGGGTCTTCCCGGAGTCGGGTTGCTTGG	203775	39	5932	1304766
chr21	+	8397220	8397281	G5859.3	AATGCAGCCCAAAGCGGGTGGTAAACTCCATCTAAGGCTAAATACCGGCACGAGACCGATAG	839	2	5	1550	FP236383.1
chr21	+	8397325	8397450	G5859.4	AGAGTTCAAGAGGGCGTGAAACCGTTAAGAGGTAAACGGGTGGGGTCCGCGCAGTCCGCCCGGAGGATTCAACCCGGCGGCGGGTCCGGCCGTGTCGGCGGCCCGGCGGATCTTTCCCGCCCCCCG	24109	16	372	97330	FP236383.1
chr21	+	8397610	8397659	G5861.1	CATTTCCACCGCGGCGGTGCGCCGCGACCGGCTCCGGGACGGCTGGGAAG	7645	6	422	43755	FP236383.1
chr21	+	8397846	8397935	G5862.1	CAGCACTCGCCGAATCCCGGGGCCGAGGGAGCGAGACCCGTCGCCGCGCTCTCCCCCCTCCCGGCGCCCACCCCCGCGGGGAATCCCCCG	2034	6	16	5808	FP236383.1
chr21	+	8397940	8397969	G5862.2	GGGGGTCTCCCCCGCGGGGGCGCGCCGGCG	581	2	4	1127	FP236383.1
chr21	+	8398061	8398156	G5863.1	TGCCGCGCGCGGGTCGGGGGGCGGGGCGGACTGTCCCCAGTGCGCCCCGGGCGGGTCGCGCCGTCGGGCCCGGGGGGAGGTTCTCTCGGGGCCACG	6464	8	205	14186	FP236383.1
chr21	+	8398186	8398237	G5863.2	AGCGAGCGCACGGGGTCGGCGGCGACGTCGGCTACCCACCCGACCCGTCTTG	2257	6	104	10304	FP236383.1
chr21	+	8398238	8398324	G5863.3	AAACACGGACCAAGGAGTCTAACACGTGCGCGAGTCGGGGGCTCGCACGAAAGCCGCCGTGGCGCAATGAAGGTGAAGGCCGGCGCG	21651	8	272	79616	FP236383.1
chr21	+	8398325	8398360	G5863.4	CTCGCCGGCCGAGGTGGGATCCCGAGGCCTCTCCAG	1187	5	19	5056	FP236383.1
chr21	+	8398361	8398398	G5863.5	TCCGCCGAGGGCGCACCACCGGCCCGTCTCGCCCGCCG	3855	3	69	11046	FP236383.1
chr21	+	8398399	8399084	G5863.6	CGCCGGGGAGGTGGAGCACGAGCGCACGTGTTAGGACCCGAAAGATGGTGAACTATGCCTGGGCAGGGCGAAGCCAGAGGAAACTCTGGTGGAGGTCCGTAGCGGTCCTGACGTGCAAATCGGTCGTCCGACCTGGGTATAGGGGCGAAAGACTAATCGAACCATCTAGTAGCTGGTTCCCTCCGAAGTTTCCCTCAGGATAGCTGGCGCTCTCGCAGACCCGACGCACCCCCGCCACGCAGTTTTATCCGGTAAAGCGAATGATTAGAGGTCTTGGGGCCGAAACGATCTCAACCTATTCTCAAACTTTAAATGGGTAAGAAGCCCGGCTCGCTGGCGTGGAGCCGGGCGTGGAATGCGAGTGCCTAGTGGGCCACTTTTGGTAAGCAGAACTGGCGC…	322379	115	13662	2587319
chr21	+	8399120	8399162	G5864.1	CCTCCTCCCCTCCTCCCGCCCACGCCCCGCTCCCCGCCCCCGG	796	2	2	944	FP236383.1
chr21	+	8399163	8399474	G5864.2	AGCCCCGCGGACGCTACGCCGCGACGAGTAGGAGGGCCGCTGCGGTGAGCCTTGAAGCCTAGGGCGCGGGCCCGGGTGGAGCCGCCGCAGGTGCAGATCTTGGTGGTAGTAGCAAATATTCAAACGAGAACTTTGAAGGCCGAAGTGGAGAAGGGTTCCATGTGAACAGCAGTTGAACATGGGTCAGTCGGTCCTGAGAGATGGGCGAGCGCCGTTCCGAAGGGACGGGCGATGGCCTCCGTTGCCCTCGGCCGATCGAAAGGGAGTCGGGTTCAGATCCCCGAATCCGGAGTGGCGGAGATGGGCGCCGCG	191899	48	5205	1207957
chr21	+	8399475	8399864	G5864.3	AGGCGTCCAGTGCGGTAACGCGACCGATCCCGGAGAAGCCGGCGGGAGCCCCGGGGAGAGTTCTCTTTTCTTTGTGAAGGGCAGGGCGCCCTGGAATGGGTTCGCCCCGAGAGAGGGGCCCGTGCCTTGGAAAGCGTCGCGGTTCCGGCGGCGTCCGGTGAGCTCTCGCTGGCCCTTGAAAATCCGGGGGAGAGGGTGTAAATCTCGCGCCGGGCCGTACCCATATCCGCAGCAGGTCTCCAAGGTGAACAGCCTCTGGCATGTTGGAACAATGTAGGTAAGGGAAGTCGGCAAGCCGGATCCGTAACTTCGGGATAAGGATTGGCTCTAAGGGCTGGGTCGGTCGGGCTGGGGCGCGAAGCGGGGCTGGGCGCGCGCCGCGGCTGGACG	100373	65	3952	741355
chr21	+	8399945	8400013	G5864.4	CTCCCCGCCCCGCGCCCTCTCTCTCTCTCTCTCCCCCGCTCCCCGTCCTCCCCCCTCCCCGGGGGAGCG	511	10	37	3261	FP236383.1
chr21	+	8400017	8400062	G5864.5	CGTGGGGGCGGCGGCGGGGGGAGAAGGGTCGGGGCGGCAGGGGCCG	251	2	3	144	FP236383.1
chr21	+	8400135	8400193	G5864.6	CCGGCGGCGGCGGCGACTCTGGACGCGAGCCGGGCCCTTCCCGTGGATCGCCCCAGCTG	244	5	12	829	FP236383.1
chr21	+	8400303	8400339	G5864.7	CGGCGGCGGTCGGCGGGCGGCGGGGCGGGGCGGTTCG	853	3	11	1458	FP236383.1
chr21	+	8400378	8400408	G5865.1	TTCCCCCCTCCTCCTCGGCGCGCGGCGGCGG	62	2	4	186	FP236383.1
chr21	+	8400476	8400767	G5866.1	CCGCGCGGCGCCTCGCCTCGGCCGGCGCCTAGCAGCCGACTTAGAACTGGTGCGGACCAGGGGAATCCGACTGTTTAATTAAAACAAAGCATCGCGAAGGCCCGCGGCGGGTGTTGACGCGATGTGATTTCTGCCCAGTGCTCTGAATGTCAAAGTGAAGAAATTCAATGAAGCGCGGGTAAACGGCGGGAGTAACTATGACTCTCTTAAGGTAGCCAAATGCCTCGTCATCTAATTAGTGACGCGCATGAATGGATGAACGAGATTCCCACTGTCCCTACCTACTATCCAG	549322	54	28547	5099883
chr21	+	8400785	8400910	G5866.2	GAACGGGCTTGGCGGAATCAGCGGGGAAAGAAGACCCTGTTGAGCTTGACTCTAGTCTGGCACGGTGAAGAGACATGAGAGGTGTAGAATAAGTGGGAGGCCCCCGGCGCCCCCCCGGTGTCCCCG	30025	20	977	146366	FP236383.1
chr21	+	8400913	8401653	G5866.3	AGGGGCCCGGGGCGGGGTCCGCCGGCCCTGCGGGCCGCCGGTGAAATACCACTACTCTGATCGTTTTTTCACTGACCCGGTGAGGCGGGGGGGCGAGCCCCGAGGGGCTCTCGCTTCTGGCGCCAAGCGCCCGGCCGCGCGCCGGCCGGGCGCGACCCGCTCCGGGGACAGTGCCAGGTGGGGAGTTTGACTGGGGCGGTACACCTGTCAAACGGTAACGCAGGTGTCCTAAGGCGAGCTCAGGGAGGACAGAAACCTCCCGTGGAGCAGAAGGGCAAAAGCTCGCTTGATCTTGATTTTCAGTACGAATACAGACCGTGAAAGCGGGGCCTCACGATCCTTCTGACCTTTTGGGTTTTAAGCAGGAGGTGTCAGAAAAGTTACCACAGGGATAACTGG…	583144	158	27076	3663836
chr21	+	8401661	8401729	G5866.4	GTTGGCCTCGGATAGCCGGTCCCCCGCCTGTCCCCGCCGGCGGGCCGCCCCCCCCCTCCACGCGCCCCG	2666	8	163	9876	FP236383.1
chr21	+	8401762	8401818	G5867.1	CCGGGACCGGGGTCCGGTGCGGAGTGCCCTTCGTCCTGGGAAACGGGGCGCGGCCGG	463	4	7	1359	FP236383.1
chr21	+	8401824	8401979	G5868.1	CGGCCGCCCCCTCGCCCGTCACGCACCGCACGTTCGTGGGGAACCTGGCGCTAAACCATTCGTAGACGACCTGCTTCTGGGTCGGGGTTTCGTACGTAGCAGAGCAGCTCCCTCGCTGCGATCTATTGAAAGTCAGCCCTCGACACAAGGGTTTGT	30098	30	1347	235379	FP236383.1
chr21	+	8433646	8433693	G5869.1	CTTCGTGATCGATGTGGTGACGTCGTGCTCTCCCGGGCCGGGTCCGAG	46	6	11	456
chr21	+	8433818	8433859	G5870.1	CGGACCCCGGCCCGACCTCGCCGTCCCGCCCGCCGCCTTCTG	31	3	3	149
chr21	+	8433870	8433912	G5871.1	CGGGCCGGCGGGGTCCTCTGACGCGGCAGACAGCCCTCGCTGT	28	2	2	136
chr21	+	8434680	8434707	G5873.1	ATCCCCCGGGCCGCCGCCTCTGTCTCTG	48	2	6	273
chr21	+	8436838	8436927	G5876.1	TCCGGCCGCGTCGGGGCCTCGCCGCGCTCTACCTTACCTACCTGGTTGATCCTGCCAGTAGCATATGCTTGTCTCAAAGATTAAGCCATG	319	11	21	3221
chr21	+	8436938	8437086	G5876.2	TACGCACGGCCGGTACAGTGAAACTGCGAATGGCTCATTAAATCAGTTATGGTTCCTTTGGTCGCTCGCTCCTCTCCTACTTGGATAACTGTGGTAATTCTAGAGCTAATACATGCCGACGGGCGCTGACCCCCTTCGCGGGGGGGATG	30406	38	2193	387472
chr21	+	8437156	8437421	G5876.3	CGGCTTTGGTGACTCTAGATAACCTCGGGCCGATCGCACGCCCCCCGTGGCGGCGACGACCCATTCGAACGTCTGCCCTATCAACTTTCGATGGTAGTCGCCGTGCCTACCATGGTGACCACGGGTGACGGGGAATCAGGGTTCGATTCCGGAGAGGGAGCCTGAGAAACGGCTACCACATCCAAGGAAGGCAGCAGGCGCGCAAATTACCCACTCCCGACCCGGGGAGGTAGTGACGAAAAATAACAATACAGGACTCTTTCGAG	42949	46	1214	224946
chr21	+	8437439	8437531	G5876.4	AGTCCACTTTAAATCCTTTAACGAGGATCCATTGGAGGGCAAGTCTGGTGCCAGCAGCCGCGGTAATTCCAGCTCCAATAGCGTATATTAAAG	794	11	33	5302
chr21	+	8437592	8437647	G5876.5	GCGAGCCACCGCCCGTCCCCGCCCCTTGCCTCTCGGCGCCCCCTCGATGCTCTTAG	807	9	36	5454	FP236383.1
chr21	+	8437648	8437692	G5876.6	CTGAGTGTCCCGCGGGGCCCGAAGCGTTTACTTTGAAAAAATTAG	1745	11	153	15274	FP671120.1
chr21	+	8437693	8437880	G5876.7	AGTGTTCAAAGCAGGCCCGAGCCGCCTGGATACCGCAGCTAGGAATAATGGAATAGGACCGCGGTTCTATTTTGTTGGTTTTCGGAACTGAGGCCATGATTAAGAGGGACGGCCGGGGGCATTCGTATTGCGCCGCTAGAGGTGAAATTCTTGGACCGGCGCAAGACGGACCAGAGCGAAAGCATTTG	19882	39	846	136757
chr21	+	8437881	8438026	G5876.8	CCAAGAATGTTTTCATTAATCAAGAACGAAAGTCGGAGGTTCGAAGACGATCAGATACCGTCGTAGTTCCGACCATAAACGATGCCGACCGGCGATGCGGCGGCGTTATTCCCATGACCCGCCGGGCAGCTTCCGGGAAACCAAAG	4976	22	177	27318
chr21	+	8438027	8438555	G5876.9	TCTTTGGGTTCCGGGGGGAGTATGGTTGCAAAGCTGAAACTTAAAGGAATTGACGGAAGGGCACCACCAGGAGTGGAGCCTGCGGCTTAATTTGACTCAACACGGGAAACCTCACCCGGCCCGGACACGGACAGGATTGACAGATTGATAGCTCTTTCTCGATTCCGTGGGTGGTGGTGCATGGCCGTTCTTAGTTGGTGGAGCGATTTGTCTGGTTAATTCCGATAACGAACGAGACTCTGGCATGCTAACTAGTTACGCGACCCCCGAGCGGTCGGCGTCCCCCAACTTCTTAGAGGGACAAGTGGCGTTCAGCCACCCGAGATTGAGCAATAACAGGTCTGTGATGCCCTTAGATGTCCGGGGCTGCACGCGCGCTACACTGACTGGCTCAGCGTG…	56546	117	2893	397033
chr21	+	8438556	8438724	G5876.10	TCCCTGCCCTTTGTACACACCGCCCGTCGCTACTACCGATTGGATGGTTTAGTGAGGCCCTCGGATCGGCCCCGCCGGGGTCGGCCCACGGCCCTGGCGGAGCGCTGAGAAGACGGTCGAACTTGACTATCTAGAGGAAGTAAAAGTCGTAACAAGGTTTCCGTAGGTG	35697	33	1143	226726
chr21	+	8439815	8439978	G5878.1	CCTCGTACGACTCTTAGCGGTGGATCACTCGGCTCGTGCGTCGATGAAGAACGCAGCTAGCTGCGAGAATTAATGTGAATTGCAGGACACATTGATCATCGACACTTCGAACGCACTTGCGGCCCCGGGTTCCTCCCGGGGCTACGCCTGTCTGAGCGTCGCTT	191841	37	7867	1786065	FP671120.1
chr21	+	8441139	8441387	G5884.1	TCCGAGACGCGACCTCAGATCAGACGTGGCGACCCGCTGAATTTAAGCATATTAGTCAGCGGAGGAGAAGAAACTAACCAGGATTCCCTCAGTAACGGCGAGTGAACAGGGAAGAGCCCAGCGCCGAATCCCCGCCCCGCGGCGGGGCGCGGGACATGTGGCGTACGGAAGACCCGCTCCCCGGCGCCGCTCGTGGGGGGCCCAAGTCCTTCTGATCGAGGCCCAGCCCGTGGACGGTGTGAGGCCGGT	178764	32	5320	1144015
chr21	+	8441388	8441438	G5884.2	AGCGGCCCCCGGCGCGCCGGGCCCGGGTCTTCCCGGAGTCGGGTTGCTTGG	662	7	38	4975
chr21	+	8441492	8441670	G5884.3	AGACCGATAGTCAACAAGTACCGTAAGGGAAAGTTGAAAAGAACTTTGAAGAGAGAGTTCAAGAGGGCGTGAAACCGTTAAGAGGTAAACGGGTGGGGTCCGCGCAGTCCGCCCGGAGGATTCAACCCGGCGGCGGGTCCGGCCGTGTCGGCGGCCCGGCGGATCTTTCCCGCCCCCCG	26006	23	515	129550
chr21	+	8441830	8441942	G5885.1	CATTTCCACCGCGGCGGTGCGCCGCGACCGGCTCCGGGACGGCTGGGAAGGCCCGGCGGGGAAGGTGGCTCGGGGGGCCCCGTCCGTCCGTCCGTCCGTCCTCCTCCTCCCCC	7971	10	450	44459
chr21	+	8442076	8442165	G5886.1	CAGCACTCGCCGAATCCCGGGGCCGAGGGAGCGAGACCCGTCGCCGCGCTCTCCCCCCTCCCGGCGCCCACCCCCGCGGGGAATCCCCCG	2102	6	17	5988	FP236383.1
chr21	+	8442168	8442272	G5887.1	AGGGGGGTCTCCCCCGCGGGGGCGCGCCGGCGTCTCCTCGTGGGGGGGCCGGGCCACCCCTCCCACGGCGCGACCGCTCTCCCACCCCTCCTCCCCGCGCCCCCG	907	6	20	2255
chr21	+	8442293	8442330	G5888.1	CCGCGCGCGGGTCGGGGGGCGGGGCGGACTGTCCCCAG	4610	2	172	8965
chr21	+	8442341	8442401	G5888.2	GCGGGTCGCGCCGTCGGGCCCGGGGGAGGTTCTCTCGGGGCCACGCGCGCGTCCCCCGAAG	6933	7	71	16916
chr21	+	8442415	8442466	G5888.3	AGCGAGCGCACGGGGTCGGCGGCGACGTCGGCTACCCACCCGACCCGTCTTG	2200	6	89	10043	FP236383.1
chr21	+	8442467	8442553	G5888.4	AAACACGGACCAAGGAGTCTAACACGTGCGCGAGTCGGGGGCTCGCACGAAAGCCGCCGTGGCGCAATGAAGGTGAAGGCCGGCGCG	21655	8	280	79851	FP236383.1
chr21	+	8442554	8443273	G5888.5	CTCGCCGGCCGAGGTGGGATCCCGAGGCCTCTCCAGTCCGCCGAGGGCGCACCACCGGCCCGTCTCGCCCGCCGCGCCGGGGAGGTGGAGCACGAGCGCACGTGTTAGGACCCGAAAGATGGTGAACTATGCCTGGGCAGGGCGAAGCCAGAGGAAACTCTGGTGGAGGTCCGTAGCGGTCCTGACGTGCAAATCGGTCGTCCGACCTGGGTATAGGGGCGAAAGACTAATCGAACCATCTAGTAGCTGGTTCCCTCCGAAGTTTCCCTCAGGATAGCTGGCGCTCTCGCAGACCCGACGCACCCCCGCCACGCAGTTTTATCCGGTAAAGCGAATGATTAGAGGTCTTGGGGCCGAAACGATCTCAACCTATTCTCAAACTTTAAATGGGTAAGAAGC…	327105	120	13888	2604753
chr21	+	8443276	8443326	G5888.6	CGCGTGTGGTGTGCGTCGGAGGGCGGCGGCGGCGGCGGCGGCGGGGGTGTG	1343	7	19	5021
chr21	+	8443407	8443709	G5889.1	GACGCTACGCCGCGACGAGTAGGAGGGCCGCTGCGGTGAGCCTTGAAGCCTAGGGCGCGGGCCCGGGTGGAGCCGCCGCAGGTGCAGATCTTGGTGGTAGTAGCAAATATTCAAACGAGAACTTTGAAGGCCGAAGTGGAGAAGGGTTCCATGTGAACAGCAGTTGAACATGGGTCAGTCGGTCCTGAGAGATGGGCGAGCGCCGTTCCGAAGGGACGGGCGATGGCCTCCGTTGCCCTCGGCCGATCGAAAGGGAGTCGGGTTCAGATCCCCGAATCCGGAGTGGCGGAGATGGGCGCCGCG	192575	49	5085	1213380
chr21	+	8443736	8444076	G5889.2	ATCCCGGAGAAGCCGGCGGGAGCCCCGGGGAGAGTTCTCTTTTCTTTGTGAAGGGCAGGGCGCCCTGGAATGGGTTCGCCCCGAGAGAGGGGCCCGTGCCTTGGAAAGCGTCGCGGTTCCGGCGGCGTCCGGTGAGCTCTCGCTGGCCCTTGAAAATCCGGGGGAGAGGGTGTAAATCTCGCGCCGGGCCGTACCCATATCCGCAGCAGGTCTCCAAGGTGAACAGCCTCTGGCATGTTGGAACAATGTAGGTAAGGGAAGTCGGCAAGCCGGATCCGTAACTTCGGGATAAGGATTGGCTCTAAGGGCTGGGTCGGTCGGGCTGGGGCGCGAAGCGGGGC	100398	61	3959	719350
chr21	+	8444144	8444251	G5890.1	CCTCCCCCGCCCCACCCCGCGCGCGCCGCTCGCTCCCTCCCCGCCCCGCGCCCTCTCTCTCTCTCTCTCCCCCGCTCCCCGTCCTCCCCCCTCCCCGGGGGAGCGCCG	621	12	45	3697
chr21	+	8444370	8444428	G5890.2	CCGGCGGCGGCGGCGACTCTGGACGCGAGCCGGGCCCTTCCCGTGGATCGCCCCAGCTG	246	5	8	849	FP236383.1
chr21	+	8444538	8444574	G5891.1	CGGCGGCGGTCGGCGGGCGGCGGGGCGGGGCGGTTCG	807	3	11	1412	FP236383.1
chr21	+	8444604	8444643	G5891.2	CGCCCCCCGTTCCCCCCTCCTCCTCGGCGCGCGGCGGCGG	80	2	2	189
chr21	+	8444657	8444690	G5891.3	AGGGGCCGCGGGCCGGTCCCCCCCGCCGGGTCCG	494	2	7	805
chr21	+	8444711	8444999	G5891.4	CGCGGCGCCTCGCCTCGGCCGGCGCCTAGCAGCCGACTTAGAACTGGTGCGGACCAGGGGAATCCGACTGTTTAATTAAAACAAAGCATCGCGAAGGCCCGCGGCGGGTGTTGACGCGATGTGATTTCTGCCCAGTGCTCTGAATGTCAAAGTGAAGAAATTCAATGAAGCGCGGGTAAACGGCGGGAGTAACTATGACTCTCTTAAGGTAGCCAAATGCCTCGTCATCTAATTAGTGACGCGCATGAATGGATGAACGAGATTCCCACTGTCCCTACCTACTATCCAG	548486	55	28580	5115225
chr21	+	8445011	8445142	G5891.5	CCAAGGGAACGGGCTTGGCGGAATCAGCGGGGAAAGAAGACCCTGTTGAGCTTGACTCTAGTCTGGCACGGTGAAGAGACATGAGAGGTGTAGAATAAGTGGGAGGCCCCCGGCGCCCCCCCGGTGTCCCCG	29835	20	947	144098
chr21	+	8445145	8445283	G5891.6	AGGGGCCCGGGGCGGGGTCCGCCGGCCCTGCGGGCCGCCGGTGAAATACCACTACTCTGATCGTTTTTTCACTGACCCGGTGAGGCGGGGGGGCGAGCCCCGAGGGGCTCTCGCTTCTGGCGCCAAGCGCCCGGCCGCG	45766	20	1137	245067	FP671120.1
chr21	+	8445286	8445885	G5891.7	CCGGCCGGGCGCGACCCGCTCCGGGGACAGTGCCAGGTGGGGAGTTTGACTGGGGCGGTACACCTGTCAAACGGTAACGCAGGTGTCCTAAGGCGAGCTCAGGGAGGACAGAAACCTCCCGTGGAGCAGAAGGGCAAAAGCTCGCTTGATCTTGATTTTCAGTACGAATACAGACCGTGAAAGCGGGGCCTCACGATCCTTCTGACCTTTTGGGTTTTAAGCAGGAGGTGTCAGAAAAGTTACCACAGGGATAACTGGCTTGTGGCGGCCAAGCGTTCATAGCGACGTCGCTTTTTGATCCTTCGATGTCGGCTCTTCCTATCATTGTGAAGCAGAATTCACCAAGCGTTGGATTGTTCACCCACTAATAGGGAACGTGAGCTGGGTTTAGACCGTCGT…	534957	138	25903	3402223
chr21	+	8445894	8445960	G5891.8	TTGGCCTCGGATAGCCGGTCCCCCGCCTGTCCCCGCCGGCGGGCCGCCCCCCCCTCCACGCGCCCCG	9636	8	255	29845
chr21	+	8445981	8446047	G5891.9	CCCCGCCGCGCGCCGGGACCGGGGTCCGGTGCGGAGTGCCCTTCGTCCTGGGAAACGGGGCGCGGCT	2083	5	23	6816
chr21	+	8446055	8446210	G5891.10	CGGCCGCCCCCTCGCCCGTCACGCACCGCACGTTCGTGGGGAACCTGGCGCTAAACCATTCGTAGACGACCTGCTTCTGGGTCGGGGTTTCGTACGTAGCAGAGCAGCTCCCTCGCTGCGATCTATTGAAAGTCAGCCCTCGACACAAGGGTTTGT	29964	31	1289	234679	FP236383.1
chr21	+	8987908	8987942	G5892.1	TCGCGGGTCTGTGGCGCGGGGCCCCGGTGGTCGTG	17	2	2	104
chr21	+	8988135	8988371	G5893.1	TCCGGCCGCGTCGGGGCCTCGCCGCGCTCTACCTACCTACCTGGTTGATCCTGCCAGTAGCATATGCTTGTCTCAAAGATTAAGCCATGCATGTCTAAGTACGCACGGCCGGTACAGTGAAACTGCGAATGGCTCATTAAATCAGTTATGGTTCCTTTGGTCGCTCGCTCCTCTCCTACTTGGATAACTGTGGTAATTCTAGAGCTAATACATGCCGACGGGCGCTGACCCCCTTCG	31107	52	2169	391956
chr21	+	8988372	8988396	G5893.2	CGGGGGGGATGCGTGCATTTATCAG	248	3	3	1386
chr21	+	8988413	8988432	G5893.3	TCAGCCCCTCTCCGGCCCCG	10	2	2	28
chr21	+	8988460	8988622	G5893.4	GTGACTCTAGATAACCTCGGGCTGATCGCACGCCCCCCGTGGCGGCGACGACCCATTCGAACGTCTGCCCTATCAACTTTCGATGGTAGTCGCCGTGCCTACCATGGTGACCACGGGTGACGGGGAATCAGGGTTCGATTCCGGAGAGGGAGCCTGAGAAACG	20328	28	726	89008
chr21	+	16539838	16539859	G5896.1	TGAGGTAGTAGGTTGTATGGTT	34	2	3	302
chr21	+	25573983	25574006	G5897.1	TTAATGCTAATCGTGATAGGGGTT	64	3	18	542	MIR155HG
chr21	+	33437421	33437456	G5902.1	CTTAAAATGTAATTAATCTTGTAAATATACTCCTAG	28	6	29	288	IFNGR2
chr21	+	34305151	34305175	G5907.1	TGGAGGGCCCAAGTCCTTCTGATTG	92	3	36	405	AP000317.2
chr21	+	44055715	44055751	G5914.1	ACCCCTTGAAGGACTCTTCTCGAACTCAGGAATCCTG	16	2	2	116	TRAPPC10
chr21	-	10014877	10014907	G5925.1	AAGAAGCAGCTTCAAACCTGCCGGGGCTTCT	31	4	22	141	CR382285.1
chr21	-	14084998	14085028	G5926.1	AAGCTACCATATGTGGGATTATGACTGAACG	688	7	22	5456
chr21	-	14085055	14085077	G5927.1	CAGGTTCAGACATTTGGTGTATG	74	2	4	587
chr21	-	17454827	17454859	G5928.1	GCATGGGTGGTTCAGTGGTAGAATTCTCGCCTG	1078	9	26	10684
chr21	-	25911765	25911800	G5931.1	ATCTCCAGCCGTGGCATTCTTTTGGGGCTGACTCTG	24	2	3	268	APP
chr21	-	32748512	32748555	G5946.1	CCAAAATTATTCAACCCCCTCATACGACTTCAGCTCCTCACTTG	14	2	2	166	PAXBP1
chr22	+	11629620	11629658	G5956.1	GTACAGTGAAACTGCGAATGGCTCATTAAATCAGTTATG	244	5	8	1843
chr22	+	11629898	11629965	G5958.1	TCTGCCCTATCAACTTTTGATGGTAGTCGCTGTGCCTACCATGGTGACCACGGGTGATGGGGAATCAG	71	2	7	299
chr22	+	11630224	11630257	G5960.1	TAGTTGGATCTTGGGAGCGGGCGGGCGGTCCGCC	884	7	26	5332
chr22	+	11630268	11630318	G5961.1	CCACCGCCTGTCCCCGCCCCTTGCCTCTTGGCGCCCCCTCGGTGCTCTTAG	14	2	13	88
chr22	+	11630366	11630453	G5962.1	TTCAAAGCAGGTCCGAGCCGCCTGGATACCGCAGCTAGGAATAATGGAATAGGACCGCGGTTCTATTTTGTTGGTTTTCAGAACTGAG	2153	12	70	10127
chr22	+	11630460	11630505	G5963.1	ATTAAGAGGGACGGCCGGGGGCATTCGTATTGTGCCGCTAGAGGTG	454	7	11	2857
chr22	+	11630599	11630646	G5964.1	ATCAGATACCGTCGTAGTTCCGACCATAAACGATGCCGACTGGCGATG	382	7	13	2361
chr22	+	11630709	11630748	G5965.1	GGTTCCGGGGGGAGTATGGTTGCAAAGCTGAAACTTAAAG	132	3	7	800
chr22	+	11630928	11631004	G5966.1	AATGAGACTCTGGCATGCTAACTAGTTACGTGACCCCCGAGCGGTCGGCGTCCCCCAACTTCTTAGAGGGACAAGTG	557	8	28	3376
chr22	+	20911141	20911193	G5975.1	CATATTAGTCAGCAGAGGAAAAGAAACTAACCAGGATTCCCTCAGTAATGGCA	171	3	22	708
chr22	+	21856280	21856303	G5978.1	CCTCTAAGTCAGAATCCCGCCCAG	434	4	11	1725
chr22	+	23894425	23894483	G5986.1	CGGCGCGTGCGTCTGTGCCTCTGCGCGGGTCTCCTGGTCCTTCTGCCATCATGCCGATG	104	3	5	1147	MIF
chr22	+	23894772	23894814	G5987.1	TACATCGCGGTGCACGTGGTCCCGGACCAGCTCATGGCCTTCG	34	2	2	209	AP000350.4
chr22	+	23895125	23895172	G5988.1	CTGTCTGCGCTGGCTCCACCCGGGAACCCGCCGCACGCTGTGTTCTAG	31	2	2	153	AP000350.4
chr22	+	26561201	26561236	G5993.1	CATTTAACCCCCCTGTACACAACTCACTCCTTTTAA	13	5	13	130
chr22	+	29769849	29769886	G5999.1	AAACGGCTTTACTTACAAAACAGACTCTTTACCTTCTG	11	2	2	130	UQCR10
chr22	+	35294986	35295033	G6006.1	AATGTTACCATCCCCAGCTGCCCTTATTTCCAGAGAACCAGACGTTTG	12	3	14	142	HMGXB4
chr22	+	35403487	35403526	G6007.1	ACATCCAGGTCATGCTCAAGTCGGACGCCAGCCCTTCCAG	13	2	5	70	MCM5
chr22	+	37806164	37806206	G6026.1	TCTCCTATTTTCTGTAAATAATTTTCTCCTTTTTTCTCTCTTG	68	7	67	1460	H1F0
chr22	+	37806242	37806263	G6027.1	ACTTTATAAGAGACAGGATTTG	60	3	11	409	H1F0
chr22	+	37877854	37877881	G6029.1	TTCCTGTCGCCTGTAGTGCCCAACTATG	12	2	3	102	EIF3L
chr22	+	38716707	38716728	G6033.1	ACACATGGGGAGCTGGACAATG	29	2	2	85	GTPBP1
chr22	+	39514168	39514189	G6034.1	AGGGGACTTATCAGCTACTTAG	23	4	4	134	MIEF1
chr22	+	39522603	39522633	G6035.1	TTGAGGATAGTCAGGAGCGTCAATGTGCTTG	14	2	2	93	ATF4
chr22	+	41622000	41622035	G6049.1	CCAACATGTCAGGGTGGGAGTCATATTACAAAACCG	11	2	2	68	XRCC6
chr22	+	41636584	41636612	G6050.1	ATGGGCCACGGATCTGACTACTCACTCAG	22	2	2	130	XRCC6
chr22	+	41636662	41636695	G6051.1	ATGAGTCATAAGAGGATCATGCTGTTCACCAATG	16	2	2	120	XRCC6
chr22	+	41663801	41663832	G6056.1	CACTTCCAGGACTGACCAGAGGCCGCGCGTCC	23	3	4	79	XRCC6
chr22	+	41907101	41907129	G6062.1	CCCCTCCCCTACTCTCACTGTAATTTATG	16	3	11	114	SREBF2
chr22	+	42615304	42615350	G6064.1	CTAATGTGAGACGAATTTTTGAGCGGGTAAAGGTCGCCCTCAAGGTG	391	8	22	2630	Z93241.1
chr22	+	45417705	45417730	G6066.1	CTTTCAGAAGCCAGAAACTCGCCGTG	11	2	2	53	RIBC2
chr22	+	46112752	46112773	G6067.1	TGAGGTAGTAGGTTGTATAGTT	29	3	8	250
chr22	+	46113691	46113712	G6068.1	TGAGGTAGTAGGTTGTGTGGTT	95	7	21	820	MIRLET7BHG
chr22	+	46329359	46329381	G6069.1	CTCTTCTTGTAGATATCAAACTG	15	2	16	119	GTSE1
chr22	-	11249850	11249882	G6074.1	GACACATTGATCATCGACACTTGAATGCACTTG	39	2	34	217
chr22	-	11251043	11251086	G6075.1	CGCTGAGAAGACAGTCGAACTTGACTATCTAGAGGAAGTAAAAG	71	2	3	527	ANKRD30BL
chr22	-	26464131	26464158	G6097.1	ATGAGGATGTTGATGGGGTCTGTGAAAG	16	2	2	126	HPS4
chr22	-	29341620	29341643	G6102.1	ACGGACCTCATCGAGCCCACACTG	19	2	3	54	AP1B1
chr22	-	30339180	30339228	G6105.1	AAGCAGTTGGCTGAGCGGCGTACTGACATCTTCGGTGTAGAGGAAACAG	20	2	3	131	SF3A1
chr22	-	35838396	35838432	G6113.1	ATCACCTCTGAGACCCACCTTGCTCATAAACAAAATG	25	2	2	177	RBFOX2
chr22	-	36285218	36285257	G6116.1	CTGGAACGCCAGAACAAGGAGCTTAAGGTCAAGCTGCAGG	26	3	10	103	MYH9
chr22	-	36305033	36305066	G6127.1	TTTCATGGACGGGAAGCAGGCGTGCGTGCTCATG	12	2	2	90	MYH9
chr22	-	36309307	36309344	G6130.1	ACAACATCGCCACACTGCTCCACCAGTCCTCTGACAAG	16	2	2	92	MYH9
chr22	-	38863182	38863218	G6148.1	TCTGGGTGCCCACTCTGACCTTTAGTTTGCCCTTCTG	11	2	3	151	CBX6
chr22	-	39313815	39313871	G6154.1	CGCCCGAGACAGACTGCGGAACCGTTCCTTGTTGCCTTCCTTCTGAGAACAGCCCTG	1375	12	76	13430
chr22	-	39313872	39313909	G6154.2	TGTTCAGTGATGAGGCCTGGAATGTGCGCTGGGCACAG	1258	8	52	8896
chr22	-	39314737	39314776	G6156.1	TATTGGGGCATGGCATCCTGCTCGTGTAGCCTTCTCTGTG	91	4	4	1117	RPL3
chr22	-	39315209	39315261	G6157.1	AATCGGACAGTGTAGAACCATTCTCTACTGCCTTCCTTCTGAGAACAGCCTTG	557	11	26	6478	RPL3
chr22	-	39315274	39315304	G6158.1	GTTCGTTGATGAGGCTCAGAGTGAGCGCTGG	62	2	6	435
chr22	-	39317513	39317585	G6162.1	ACACCACCCATGGTGGTTGTGGGCATTGTGGGCTACGTGGAAACCCCTCGAGGCCTCCGGACCTTCAAGACTG	63	4	8	438	RPL3
chr22	-	39319051	39319113	G6164.1	CACAGATGATGAACTTATTGACGGGCGGACAGAAACTGTGTGCTGATTGTCACGTTCTGATTT	835	15	39	7683	RPL3
chr22	-	39495793	39495810	G6165.1	TGCTGTGAGGCATGCTGG	70	2	2	348
chr22	-	41074714	41074749	G6167.1	ACCTGGCTGGCCGGGACCTGACTGACTACCTCATGG	37	2	3	212
chr22	-	41437054	41437099	G6174.1	CGGGCCAATGTGCCTGAGGAGCTGAGTGTCTGGATTGATCCCTTTG	24	2	5	202	TOB2
chr22	-	42565128	42565155	G6181.1	TCTTCGGTCAAGGGTATACGAGTAGCTG	56	2	2	306
chr22	-	42619001	42619032	G6184.1	AACTCCCACAACCACATGTATTTATTCCTCTG	11	3	11	99	CYB5R3
chr22	-	42797029	42797075	G6186.1	CAAATAATATTTGAAGTCATCTGTCTCTTTGTAAATTATTTTATATG	12	4	13	251	ARFGAP3
chr22	-	49774149	49774180	G6193.1	TTTGTATATTGTTCAAAACTTAACTTATTCTG	42	8	47	610	BRD1
chr22	-	50281395	50281425	G6198.1	CCTCATCTTGCCGCTGGTCATCGTGCCCATG	20	2	2	170	PLXNB2
chr22_KI270733v1_random	+	112483	112524	G6210.1	CCAATGGGGTGAAGCTACCATCTGTGGGATTATGACTGAACG	502	8	17	4700
chr22_KI270733v1_random	+	122696	122744	G6211.1	TCTTCGTGATCGATGTGGTGACGTCGTGCTCTCCCGGGCCGGGTCCGAG	47	4	9	490
chr22_KI270733v1_random	+	122869	122910	G6212.1	CGGACCCCGGCCCGACCTCGCCGTCCCGCCCGCCGCCTTCTG	32	2	5	151
chr22_KI270733v1_random	+	122922	122965	G6213.1	CGGGCCGGCGGGGTCCTCTGACGCGGCAGACAGCCCTCGCTGTC	31	3	4	145
chr22_KI270733v1_random	+	123732	123769	G6215.1	ATCCCCCGGGCCGCCGCCTCTGTCTCTGCCTCCGTTAT	60	2	3	414
chr22_KI270733v1_random	+	125931	125971	G6219.1	TACCTGGTTGATCCTGCCAGTAGCATATGCTTGTCTCAAAG	361	9	13	3199	FP671120.1
chr22_KI270733v1_random	+	125972	126153	G6219.2	ATTAAGCCATGCATGTCTAAGTACGCACGGCCGGTACAGTGAAACTGCGAATGGCTCATTAAATCAGTTATGGTTCCTTTGGTCGCTCGCTCCTCTCCTACTTGGATAACTGTGGTAATTCTAGAGCTAATACATGCCGACGGGCGCTGACCCCCTTCGCGGGGGGGATGCGTGCATTTATC	31438	47	2247	396558
chr22_KI270733v1_random	+	126172	126586	G6219.3	TCAGCCCCTCTCCGGCCCCGGCCGGGGGGCGGGCGCCGGCGGCTTTGGTGACTCTAGATAACCTCGGGCCGATCGCACGCCCCCCGTGGCGGCGACGACCCATTCGAACGTCTGCCCTATCAACTTTCGATGGTAGTCGCCGTGCCTACCATGGTGACCACGGGTGACGGGGAATCAGGGTTCGATTCCGGAGAGGGAGCCTGAGAAACGGCTACCACATCCAAGGAAGGCAGCAGGCGCGCAAATTACCCACTCCCGACCCGGGGAGGTAGTGACGAAAAATAACAATACAGGACTCTTTCGAGGCCCTGTAATTGGAATGAGTCCACTTTAAATCCTTTAACGAGGATCCATTGGAGGGCAAGTCTGGTGCCAGCAGCCGCGGTAATTCCAGCTCCA…	43514	65	1286	229579
chr22_KI270733v1_random	+	126652	126702	G6219.4	CCACCGCCCGTCCCCGCCCCTTGCCTCTCGGCGCCCCCTCGATGCTCTTAG	769	9	52	5251	FP671120.1
chr22_KI270733v1_random	+	126703	126747	G6220.1	CTGAGTGTCCCGCGGGGCCCGAAGCGTTTACTTTGAAAAAATTAG	1600	11	141	14133	FP671120.1
chr22_KI270733v1_random	+	126748	127694	G6220.2	AGTGTTCAAAGCAGGCCCGAGCCGCCTGGATACCGCAGCTAGGAATAATGGAATAGGACCGCGGTTCTATTTTGTTGGTTTTCGGAACTGAGGCCATGATTAAGAGGGACGGCCGGGGGCATTCGTATTGCGCCGCTAGAGGTGAAATTCTTGGACCGGCGCAAGACGGACCAGAGCGAAAGCATTTGCCAAGAATGTTTTCATTAATCAAGAACGAAAGTCGGAGGTTCGAAGACGATCAGATACCGTCGTAGTTCCGACCATAAACGATGCCGACCGGCGATGCGGCGGCGTTATTCCCATGACCCGCCGGGCAGCTTCCGGGAAACCAAAGTCTTTGGGTTCCGGGGGGAGTATGGTTGCAAAGCTGAAACTTAAAGGAATTGACGGAAGGGCACC…	91162	198	4346	643562
chr22_KI270733v1_random	+	127695	127779	G6220.3	CCCACGGCCCTGGCGGAGCGCTGAGAAGACGGTCGAACTTGACTATCTAGAGGAAGTAAAAGTCGTAACAAGGTTTCCGTAGGTG	19746	16	809	141558
chr22_KI270733v1_random	+	127786	127806	G6221.1	CGGAAGGATCATTAACGGAGC	23	2	4	65
chr22_KI270733v1_random	+	128869	129033	G6222.1	CCTCGTACGACTCTTAGCGGTGGATCACTCGGCTCGTGCGTCGATGAAGAACGCAGCTAGCTGCGAGAATTAATGTGAATTGCAGGACACATTGATCATCGACACTTCGAACGCACTTGCGGCCCCGGGTTCCTCCCGGGGCTACGCCTGTCTGAGCGTCGCTTG	191994	37	7931	1787483
chr22_KI270733v1_random	+	129395	129422	G6225.1	TTCGGGGTTCGTCGGCCCCGGCCGGGTG	20	2	2	110
chr22_KI270733v1_random	+	130073	130095	G6227.1	TCGGCCGCGCGCTCTCTCTCCCG	74	2	2	366
chr22_KI270733v1_random	+	130196	130447	G6228.1	CTCCGAGACGCGACCTCAGATCAGACGTGGCGACCCGCTGAATTTAAGCATATTAGTCAGCGGAGGAGAAGAAACTAACCAGGATTCCCTCAGTAACGGCGAGTGAACAGGGAAGAGCCCAGCGCCGAATCCCCGCCCCGCGGCGGGGCGCGGGACATGTGGCGTACGGAAGACCCGCTCCCCGGCGCCGCTCGTGGGGGGCCCAAGTCCTTCTGATCGAGGCCCAGCCCGTGGACGGTGTGAGGCCGGTAG	180382	33	5313	1155637
chr22_KI270733v1_random	+	130448	130501	G6228.2	CGGCCCCCGGCGCGCCGGGCCCGGGTCTTCCCGGAGTCGGGTTGCTTGGGAATG	659	7	41	4632
chr22_KI270733v1_random	+	130512	130728	G6228.3	CGGGTGGTAAACTCCATCTAAGGCTAAATACCGGCACGAGACCGATAGTCAACAAGTACCGTAAGGGAAAGTTGAAAAGAACTTTGAAGAGAGAGTTCAAGAGGGCGTGAAACCGTTAAGAGGTAAACGGGTGGGGTCCGCGCAGTCCGCCCGGAGGATTCAACCCGGCGGCGGGTCCGGCCGTGTCGGCGGCCCGGCGGATCTTTCCCGCCCCCCG	26562	26	517	132750
chr22_KI270733v1_random	+	130888	130937	G6229.1	CATTTCCACCGCGGCGGTGCGCCGCGACCGGCTCCGGGACGGCTGGGAAG	7760	6	446	44043	FP236383.1
chr22_KI270733v1_random	+	130939	131001	G6229.2	CCCGGCGGGGAAGGTGGCTCGGGGGGCCCCGTCCGTCCGTCCGTCCGTCCTCCTCCTCCCCCG	349	3	3	548
chr22_KI270733v1_random	+	131258	131330	G6229.3	TCTCCTCGTGGGGGGGCCGGGCCACCCCTCCCACGGCGCGACCGCTCTCCCACCCCTCCTCCCCGCGCCCCCG	360	5	12	1186
chr22_KI270733v1_random	+	131351	131458	G6230.1	CCGCGCGCGGGTCGGGGGGCGGGGCGGACTGTCCCCAGTGCGCCCCGGGCGGGTCGCGCCGTCGGGCCCGGGGGAGGTTCTCTCGGGGCCACGCGCGCGTCCCCCGAA	11629	10	261	26222
chr22_KI270733v1_random	+	131472	131599	G6230.2	GAGCGAGCGCACGGGGTCGGCGGCGACGTCGGCTACCCACCCGACCCGTCTTGAAACACGGACCAAGGAGTCTAACACGTGCGCGAGTCGGGGGCTCGCACGAAAGCCGCCGTGGCGCAATGAAGGTG	23758	14	406	89321
chr22_KI270733v1_random	+	131612	131685	G6230.3	CTCGCCGGCCGAGGTGGGATCCCGAGGCCTCTCCAGTCCGCCGAGGGCGCACCACCGGCCCGTCTCGCCCGCCG	5009	8	76	16303
chr22_KI270733v1_random	+	131686	131840	G6230.4	CGCCGGGGAGGTGGAGCACGAGCGCACGTGTTAGGACCCGAAAGATGGTGAACTATGCCTGGGCAGGGCGAAGCCAGAGGAAACTCTGGTGGAGGTCCGTAGCGGTCCTGACGTGCAAATCGGTCGTCCGACCTGGGTATAGGGGCGAAAGACTA	86667	23	2095	518637
chr22_KI270733v1_random	+	131885	132382	G6230.5	ATAGCTGGCGCTCTCGCAGACCCGACGCACCCCCGCCACGCAGTTTTATCCGGTAAAGCGAATGATTAGAGGTCTTGGGGCCGAAACGATCTCAACCTATTCTCAAACTTTAAATGGGTAAGAAGCCCGGCTCGCTGGCGTGGAGCCGGGCGTGGAATGCGAGTGCCTAGTGGGCCACTTTTGGTAAGCAGAACTGGCGCTGCGGGATGAACCGAACGCCGGGTTAAGGCGCCCGATGCCGACGCTCATCAGACCCCAGAAAAGGTGTTGGTTGATATAGACAGCAGGACGGTGGCCATGGAAGTCGGAATCCGCTAAGGAGTGTGTAACAACTCACCTGCCGAATCAACTAGCCCTGAAAATGGATGGCGCTGGAGCGTCGGGCCCATACCCGGCCGT…	235051	82	11483	2026886
chr22_KI270733v1_random	+	132441	132730	G6231.1	CTCCCCGCCCCCGGAGCCCCGCGGACGCTACGCCGCGACGAGTAGGAGGGCCGCTGCGGTGAGCCTTGAAGCCTAGGGCGCGGGCCCGGGTGGAGCCGCCGCAGGTGCAGATCTTGGTGGTAGTAGCAAATATTCAAACGAGAACTTTGAAGGCCGAAGTGGAGAAGGGTTCCATGTGAACAGCAGTTGAACATGGGTCAGTCGGTCCTGAGAGATGGGCGAGCGCCGTTCCGAAGGGACGGGCGATGGCCTCCGTTGCCCTCGGCCGATCGAAAGGGAGTCGGGTTCAG	174390	45	4881	1151166
chr22_KI270733v1_random	+	132731	132766	G6231.2	ATCCCCGAATCCGGAGTGGCGGAGATGGGCGCCGCG	16401	4	171	50078
chr22_KI270733v1_random	+	132767	132944	G6231.3	AGGCGTCCAGTGCGGTAACGCGACCGATCCCGGAGAAGCCGGCGGGAGCCCCGGGGAGAGTTCTCTTTTCTTTGTGAAGGGCAGGGCGCCCTGGAATGGGTTCGCCCCGAGAGAGGGGCCCGTGCCTTGGAAAGCGTCGCGGTTCCGGCGGCGTCCGGTGAGCTCTCGCTGGCCCTTG	44345	27	2429	349613	FP671120.1
chr22_KI270733v1_random	+	132945	133134	G6231.4	AAAATCCGGGGGAGAGGGTGTAAATCTCGCGCCGGGCCGTACCCATATCCGCAGCAGGTCTCCAAGGTGAACAGCCTCTGGCATGTTGGAACAATGTAGGTAAGGGAAGTCGGCAAGCCGGATCCGTAACTTCGGGATAAGGATTGGCTCTAAGGGCTGGGTCGGTCGGGCTGGGGCGCGAAGCGGGGCT	55936	33	1481	391651
chr22_KI270733v1_random	+	133202	133307	G6231.5	CTCCCCCGCCCCACCCCGCGCGCGCCGCTCGCTCCCTCCCCACCCCGCGCCCTCTCTCTCTCTCTCTCCCCCGCTCCCCGTCCTCCCCCCTCCCCGGGGGAGCGCC	632	11	43	3851
chr22_KI270733v1_random	+	133415	133484	G6231.6	CACCCGGGGGGCCGGCGGCGGCGGCGACTCTGGACGCGAGCCGGGCCCTTCCCGTGGATCGCCCCAGCTG	289	5	10	914
chr22_KI270733v1_random	+	133541	133577	G6232.1	ACCCCCACCCCACGTCTCGTCGCGCGCGCGTCCGCTG	144	3	4	534
chr22_KI270733v1_random	+	133606	133636	G6232.2	CGGTCGGCGGGCGGCGGGGCGGGGCGGTTCG	768	3	10	1315	FP671120.1
chr22_KI270733v1_random	+	133725	133758	G6233.1	AGGGGCCGCGGGCCGGTCCCCCCCGCCGGGTCCG	505	2	6	823
chr22_KI270733v1_random	+	133774	133874	G6233.2	TTCCGCGCGGCGCCTCGCCTCGGCCGGCGCCTAGCAGCCGACTTAGAACTGGTGCGGACCAGGGGAATCCGACTGTTTAATTAAAACAAAGCATCGCGAAG	257826	17	8619	1553913
chr22_KI270733v1_random	+	133880	134067	G6233.3	CGGCGGGTGTTGACGCGATGTGATTTCTGCCCAGTGCTCTGAATGTCAAAGTGAAGAAATTCAATGAAGCGCGGGTAAACGGCGGGAGTAACTATGACTCTCTTAAGGTAGCCAAATGCCTCGTCATCTAATTAGTGACGCGCATGAATGGATGAACGAGATTCCCACTGTCCCTACCTACTATCCAG	302802	39	19836	3589693
chr22_KI270733v1_random	+	134079	134212	G6233.4	CCAAGGGAACGGGCTTGGCGGAATCAGCGGGGAAAGAAGACCCTGTTGAGCTTGACTCTAGTCTGGCACGGTGAAGAGACATGAGAGGTGTAGAATAAGTGGGAGGCCCCCGGCGCCCCCCCGGTGTCCCCGCG	29974	20	961	145662
chr22_KI270733v1_random	+	134213	134351	G6233.5	AGGGGCCCGGGGCGGGGTCCGCCGGCCCTGCGGGCCGCCGGTGAAATACCACTACTCTGATCGTTTTTTCACTGACCCGGTGAGGCGGGGGGGCGAGCCCCGAGGGGCTCTCGCTTCTGGCGCCAAGCGCCCGGCCGCG	44956	21	1085	240233	FP671120.1
chr22_KI270733v1_random	+	134354	134426	G6233.6	CCGGCCGGGCGCGACCCGCTCCGGGGACAGTGCCAGGTGGGGAGTTTGACTGGGGCGGTACACCTGTCAAACG	271001	10	4252	1089592
chr22_KI270733v1_random	+	134427	135029	G6233.7	GTAACGCAGGTGTCCTAAGGCGAGCTCAGGGAGGACAGAAACCTCCCGTGGAGCAGAAGGGCAAAAGCTCGCTTGATCTTGATTTTCAGTACGAATACAGACCGTGAAAGCGGGGCCTCACGATCCTTCTGACCTTTTGGGTTTTAAGCAGGAGGTGTCAGAAAAGTTACCACAGGGATAACTGGCTTGTGGCGGCCAAGCGTTCATAGCGACGTCGCTTTTTGATCCTTCGATGTCGGCTCTTCCTATCATTGTGAAGCAGAATTCACCAAGCGTTGGATTGTTCACCCACTAATAGGGAACGTGAGCTGGGTTTAGACCGTCGTGAGACAGGTTAGTTTTACCCTACTGATGATGTGTTGTTGCCATGGTAATCCTGCTCAGTACGAGAGGAACCGC…	267212	136	22147	2339101
chr22_KI270733v1_random	+	135072	135122	G6233.8	GGTCCGGTGCGGAGTGCCCTTCGTCCTGGGAAACGGGGCGCGGCCGGAAAG	737	4	17	2107
chr22_KI270733v1_random	+	135142	135279	G6233.9	TCACGCACCGCACGTTCGTGGGGAACCTGGCGCTAAACCATTCGTAGACGACCTGCTTCTGGGTCGGGGTTTCGTACGTAGCAGAGCAGCTCCCTCGCTGCGATCTATTGAAAGTCAGCCCTCGACACAAGGGTTTGT	29984	31	1378	233822	FP671120.1
chr22_KI270733v1_random	+	167780	167819	G6234.1	CTTCGTGATCGATGTGGTGACGTCGTGCTCTCCCGGGCCG	39	5	8	392
chr22_KI270733v1_random	+	168815	168857	G6237.1	ATCCCCCGGGCCGCCGCCTCTGTCTCTGCCTCCGTTATGGTAG	56	4	7	390
chr22_KI270733v1_random	+	168966	169005	G6238.1	CGGCTCGTCGCCTACTGTGGCCCGCGCCTCCCCCCTTCCG	38	2	2	278
chr22_KI270733v1_random	+	170975	171052	G6241.1	TCCGGCCGCGTCGGGGCCTCGCCGCGCTCTACCTACCTACCTGGTTGATCCTGCCAGTAGCATATGCTTGTCTCAAAG	360	10	13	3150
chr22_KI270733v1_random	+	171053	171234	G6241.2	ATTAAGCCATGCATGTCTAAGTACGCACGGCCGGTACAGTGAAACTGCGAATGGCTCATTAAATCAGTTATGGTTCCTTTGGTCGCTCGCTCCTCTCCTACTTGGATAACTGTGGTAATTCTAGAGCTAATACATGCCGACGGGCGCTGACCCCCTTCGCGGGGGGGATGCGTGCATTTATC	31238	44	2206	392051
chr22_KI270733v1_random	+	171320	171462	G6241.3	GCCGATCGCACGCCCCCCGTGGCGGCGACGACCCATTCGAACGTCTGCCCTATCAACTTTCGATGGTAGTCGCCGTGCCTACCATGGTGACCACGGGTGACGGGGAATCAGGGTTCGATTCCGGAGAGGGAGCCTGAGAAACG	38937	24	733	105456
chr22_KI270733v1_random	+	171464	171526	G6241.4	CTACCACATCCAAGGAAGGCAGCAGGCGCGCAAATTACCCACTCCCGACCCGGGGAGGTAGTG	4343	7	42	11283
chr22_KI270733v1_random	+	171559	171691	G6241.5	CCCTGTAATTGGAATGAGTCCACTTTAAATCCTTTAACGAGGATCCATTGGAGGGCAAGTCTGGTGCCAGCAGCCGCGGTAATTCCAGCTCCAATAGCGTATATTAAAGTTGCTGCAGTTAAAAAGCTCGTAG	12693	23	171	38243
chr22_KI270733v1_random	+	171728	171783	G6241.6	GCGAGCCACCGCCCGTCCCCGCCCCTTGCCTCTCGGCGCCCCCTCGATGCTCTTAG	793	8	38	5338	FP236383.1
chr22_KI270733v1_random	+	171784	171828	G6241.7	CTGAGTGTCCCGCGGGGCCCGAAGCGTTTACTTTGAAAAAATTAG	1660	11	137	14709	FP671120.1
chr22_KI270733v1_random	+	171829	172578	G6241.8	AGTGTTCAAAGCAGGCCCGAGCCGCCTGGATACCGCAGCTAGGAATAATGGAATAGGACCGCGGTTCTATTTTGTTGGTTTTCGGAACTGAGGCCATGATTAAGAGGGACGGCCGGGGGCATTCGTATTGCGCCGCTAGAGGTGAAATTCTTGGACCGGCGCAAGACGGACCAGAGCGAAAGCATTTGCCAAGAATGTTTTCATTAATCAAGAACGAAAGTCGGAGGTTCGAAGACGATCAGATACCGTCGTAGTTCCGACCATAAACGATGCCGACCGGCGATGCGGCGGCGTTATTCCCATGACCCGCCGGGCAGCTTCCGGGAAACCAAAGTCTTTGGGTTCCGGGGGGAGTATGGTTGCAAAGCTGAAACTTAAAGGAATTGACGGAAGGGCACC…	71659	157	3698	508861
chr22_KI270733v1_random	+	172579	172860	G6241.9	CAGGCGCGGGTAACCCGTTGAACCCCATTCGTGATGGGGATCGGGGATTGCAATTATTCCCCATGAACGAGGAATTCCCAGTAAGTGCGGGTCATAAGCTTGCGTTGATTAAGTCCCTGCCCTTTGTACACACCGCCCGTCGCTACTACCGATTGGATGGTTTAGTGAGGCCCTCGGATCGGCCCCGCCGGGGTCGGCCCACGGCCCTGGCGGAGCGCTGAGAAGACGGTCGAACTTGACTATCTAGAGGAAGTAAAAGTCGTAACAAGGTTTCCGTAGGTG	39285	58	1446	273407
chr22_KI270733v1_random	+	173948	174112	G6245.1	CCTCGTACGACTCTTAGCGGTGGATCACTCGGCTCGTGCGTCGATGAAGAACGCAGCTAGCTGCGAGAATTAATGTGAATTGCAGGACACATTGATCATCGACACTTCGAACGCACTTGCGGCCCCGGGTTCCTCCCGGGGCTACGCCTGTCTGAGCGTCGCTTG	190755	36	8047	1775436
chr22_KI270733v1_random	+	174474	174529	G6248.1	TTCGGGGTTCGTCGGCCCCGGCCGGGTGGAAGGTCCCGTGCCCGTCGTCGTCGTCG	35	4	5	208
chr22_KI270733v1_random	+	175152	175174	G6250.1	TCGGCCGCGCGCTCTCTCTCCCG	78	2	2	386
chr22_KI270733v1_random	+	175275	175375	G6251.1	CTCCGAGACGCGACCTCAGATCAGACGTGGCGACCCGCTGAATTTAAGCATATTAGTCAGCGGAGGAGAAGAAACTAACCAGGATTCCCTCAGTAACGGCG	162349	16	4873	1071844
chr22_KI270733v1_random	+	175376	175516	G6251.2	AGTGAACAGGGAAGAGCCCAGCGCCGAATCCCCGCCCCGCGGCGGGGCGCGGGACATGTGGCGTACGGAAGACCCGCTCCCCGGCGCCGCTCGTGGGGGGCCCAAGTCCTTCTGATCGAGGCCCAGCCCGTGGACGGTGTG	16984	16	462	76803
chr22_KI270733v1_random	+	175527	175575	G6251.3	CGGCCCCCGGCGCGCCGGGCCCGGGTCTTCCCGGAGTCGGGTTGCTTGG	620	5	40	4700
chr22_KI270733v1_random	+	175577	175625	G6251.4	AATGCAGCCCAAAGCGGGTGGTAAACTCCATCTAAGGCTAAATACCGGC	205	3	4	679
chr22_KI270733v1_random	+	175684	175807	G6251.5	AGTTCAAGAGGGCGTGAAACCGTTAAGAGGTAAACGGGTGGGGTCCGCGCAGTCCGCCCGGAGGATTCAACCCGGCGGCGGGTCCGGCCGTGTCGGCGGCCCGGCGGATCTTTCCCGCCCCCCG	20644	15	363	97016
chr22_KI270733v1_random	+	175967	176032	G6253.1	CATTTCCACCGCGGCGGTGCGCCGCGACCGGCTCCGGGACGGCTGGGAAGGCCCGGCGGGGAAGGT	7868	7	411	43723
chr22_KI270733v1_random	+	176305	176409	G6253.2	AGGGGGGTCTCCCCCGCGGGGGCGCGCCGGCGTCTCCTCGTGGGGGGGCCGGGCCACCCCTCCCACGGCGCGACCGCTCTCCCACCCCTCCTCCCCGCGCCCCCG	984	7	18	2460
chr22_KI270733v1_random	+	176429	176460	G6254.1	GCCGCGCGCGGGTCGGGGGGCGGGGCGGACTG	4636	2	179	8976
chr22_KI270733v1_random	+	176478	176538	G6254.2	GCGGGTCGCGCCGTCGGGCCCGGGGGAGGTTCTCTCGGGGCCACGCGCGCGTCCCCCGAAG	6720	7	65	16398
chr22_KI270733v1_random	+	176554	176603	G6254.3	CGAGCGCACGGGGTCGGCGGCGACGTCGGCTACCCACCCGACCCGTCTTG	2207	6	90	10085
chr22_KI270733v1_random	+	176604	177463	G6254.4	AAACACGGACCAAGGAGTCTAACACGTGCGCGAGTCGGGGGCTCGCACGAAAGCCGCCGTGGCGCAATGAAGGTGAAGGCCGGCGCGCTCGCCGGCCGAGGTGGGATCCCGAGGCCTCTCCAGTCCGCCGAGGGCGCACCACCGGCCCGTCTCGCCCGCCGCGCCGGGGAGGTGGAGCACGAGCGCACGTGTTAGGACCCGAAAGATGGTGAACTATGCCTGGGCAGGGCGAAGCCAGAGGAAACTCTGGTGGAGGTCCGTAGCGGTCCTGACGTGCAAATCGGTCGTCCGACCTGGGTATAGGGGCGAAAGACTAATCGAACCATCTAGTAGCTGGTTCCCTCCGAAGTTTCCCTCAGGATAGCTGGCGCTCTCGCAGACCCGACGCACCCCCGCCAC…	350625	135	14274	2694608
chr22_KI270733v1_random	+	177536	177845	G6254.5	CCCCGCGGACGCTACGCCGCGACGAGTAGGAGGGCCGCTGCGGTGAGCCTTGAAGCCTAGGGCGCGGGCCCGGGTGGAGCCGCCGCAGGTGCAGATCTTGGTGGTAGTAGCAAATATTCAAACGAGAACTTTGAAGGCCGAAGTGGAGAAGGGTTCCATGTGAACAGCAGTTGAACATGGGTCAGTCGGTCCTGAGAGATGGGCGAGCGCCGTTCCGAAGGGACGGGCGATGGCCTCCGTTGCCCTCGGCCGATCGAAAGGGAGTCGGGTTCAGATCCCCGAATCCGGAGTGGCGGAGATGGGCGCCGCG	193128	47	5080	1219809
chr22_KI270733v1_random	+	177846	178023	G6254.6	AGGCGTCCAGTGCGGTAACGCGACCGATCCCGGAGAAGCCGGCGGGAGCCCCGGGGAGAGTTCTCTTTTCTTTGTGAAGGGCAGGGCGCCCTGGAATGGGTTCGCCCCGAGAGAGGGGCCCGTGCCTTGGAAAGCGTCGCGGTTCCGGCGGCGTCCGGTGAGCTCTCGCTGGCCCTTG	44438	30	2440	350843	FP671120.1
chr22_KI270733v1_random	+	178024	178214	G6254.7	AAAATCCGGGGGAGAGGGTGTAAATCTCGCGCCGGGCCGTACCCATATCCGCAGCAGGTCTCCAAGGTGAACAGCCTCTGGCATGTTGGAACAATGTAGGTAAGGGAAGTCGGCAAGCCGGATCCGTAACTTCGGGATAAGGATTGGCTCTAAGGGCTGGGTCGGTCGGGCTGGGGCGCGAAGCGGGGCTG	55926	34	1434	390847
chr22_KI270733v1_random	+	178301	178387	G6254.8	CGCGCCGCTCGCTCCCTCCCCACCCCGCGCCCTCTCTCTCTCTCTCTCCCCCGCTCCCCGTCCTCCCCCCTCCCCGGGGGAGCGCCG	635	12	53	3898
chr22_KI270733v1_random	+	178501	178563	G6254.9	GGGGCCGGCGGCGGCGGCGACTCTGGACGCGAGCCGGGCCCTTCCCGTGGATCGCCCCAGCTG	262	2	7	898
chr22_KI270733v1_random	+	178631	178656	G6255.1	ACGTCTCGTCGCGCGCGCGTCCGCTG	135	3	4	482
chr22_KI270733v1_random	+	178688	178715	G6255.2	TCGGCGGGCGGCGGGGCGGGGCGGTTCG	759	3	15	1373
chr22_KI270733v1_random	+	178733	178796	G6256.1	CCCGGCCCCGTCCGCCCCCCGTTCCCCCCTCCTCCTCGGCGCGCGGCGGCGGCGGCGGCGGCGG	140	2	3	166
chr22_KI270733v1_random	+	178804	178837	G6256.2	AGGGGCCGCGGGCCGGTCCCCCCCGCCGGGTCCG	492	2	6	802
chr22_KI270733v1_random	+	178853	179128	G6256.3	TTCCGCGCGGCGCCTCGCCTCGGCCGGCGCCTAGCAGCCGACTTAGAACTGGTGCGGACCAGGGGAATCCGACTGTTTAATTAAAACAAAGCATCGCGAAGGCCCGCGGCGGGTGTTGACGCGATGTGATTTCTGCCCAGTGCTCTGAATGTCAAAGTGAAGAAATTCAATGAAGCGCGGGTAAACGGCGGGAGTAACTATGACTCTCTTAAGGTAGCCAAATGCCTCGTCATCTAATTAGTGACGCGCATGAATGGATGAACGAGATTCCCACTG	551315	55	28385	5134327
chr22_KI270733v1_random	+	179163	179289	G6256.4	GGAACGGGCTTGGCGGAATCAGCGGGGAAAGAAGACCCTGTTGAGCTTGACTCTAGTCTGGCACGGTGAAGAGACATGAGAGGTGTAGAATAAGTGGGAGGCCCCCGGCGCCCCCCCGGTGTCCCCG	29822	20	908	145792
chr22_KI270733v1_random	+	179292	179430	G6256.5	AGGGGCCCGGGGCGGGGTCCGCCGGCCCTGCGGGCCGCCGGTGAAATACCACTACTCTGATCGTTTTTTCACTGACCCGGTGAGGCGGGGGGGCGAGCCCCGAGGGGCTCTCGCTTCTGGCGCCAAGCGCCCGGCCGCG	45123	21	1125	242146	FP671120.1
chr22_KI270733v1_random	+	179433	179767	G6256.6	CCGGCCGGGCGCGACCCGCTCCGGGGACAGTGCCAGGTGGGGAGTTTGACTGGGGCGGTACACCTGTCAAACGGTAACGCAGGTGTCCTAAGGCGAGCTCAGGGAGGACAGAAACCTCCCGTGGAGCAGAAGGGCAAAAGCTCGCTTGATCTTGATTTTCAGTACGAATACAGACCGTGAAAGCGGGGCCTCACGATCCTTCTGACCTTTTGGGTTTTAAGCAGGAGGTGTCAGAAAAGTTACCACAGGGATAACTGGCTTGTGGCGGCCAAGCGTTCATAGCGACGTCGCTTTTTGATCCTTCGATGTCGGCTCTTCCTATCATTGTGAAGCAG	371366	73	13642	1979711
chr3	+	9374325	9374346	G6258.1	TTCTGGGCTGTGGTGCGCTATG	19	2	2	148	THUMPD3
chr3	+	9477795	9477831	G6259.1	CCTGGGATGCTGGTTTCTTTGTATATTATATAAAACG	50	2	50	665	SETD5
chr3	+	10149843	10149880	G6265.1	AATTACAGGAGACTGGACATCGTCAGGTCGCTCTACGA	12	2	2	80	VHL
chr3	+	15738591	15738623	G6270.1	TTCTGGGCTGTAGTGCGCTATGCCGATCGGGTG	16	4	6	133
chr3	+	23919203	23919238	G6271.1	CTGGACGCCACTGTGGGGCTCTGAGAGTCCTGAATT	80	2	7	585	RPL15
chr3	+	33386077	33386118	G6276.1	CAACTTTATCAAAGTGACTGTACTGCAAATTAATTCATAATG	14	2	5	191	FBXL2
chr3	+	37969413	37969434	G6277.1	TTCAAGTAATCCAGGATAGGCT	29	2	9	164
chr3	+	38524929	38524954	G6280.1	TTGTACATTTTTCCCTCTAGGACCTG	21	2	22	209	EXOG
chr3	+	39407621	39407669	G6281.1	ATTCCCGTCGTAACTTAAAGGGAAATTTTCACAATGTCCGGAGCCCTTG	16	3	7	217	RPSA
chr3	+	39408435	39408480	G6282.1	AACTTCTGAGTGTCGGAAGTGTGCTATATCAATGGCAGGATTTTCG	49	2	2	494
chr3	+	39411055	39411089	G6284.1	GTGCACATTGTTAGAGCTTGGAGTTGAGGCTACTG	207	5	21	1920
chr3	+	39411090	39411130	G6285.1	ACTGGCCGATGAACTCGCAAGTGTAGGTAGTGTGCTACATG	38	2	2	353
chr3	+	49533707	49533753	G6303.1	TTTACCTAAACTTGTATGTATAATTTTTGGGTGGGTATGGGGAATTG	14	3	15	259	DAG1
chr3	+	50118860	50118901	G6308.1	CCTTGTGTATATTTGTATATTACACATTTGTACAGAATTTTG	21	5	21	271	RBM5
chr3	+	51392260	51392293	G6311.1	CCTGGATGCCGCTGCTGCCGCCGCCGTGGGACTG	43	2	3	205	RBM15B
chr3	+	52690786	52690817	G6313.1	TGAATGAAAAATTACAAGATCCAACTCTGATT	275	4	4	2062
chr3	+	52692743	52692771	G6315.1	AGCAAATGATGATAAACTGGATCTGACTG	126	3	11	868
chr3	+	52692772	52692803	G6315.2	ACTGTGCTGAGTCTGTTCAATCCAACCCTGAG	91	3	5	766
chr3	+	52694352	52694424	G6316.1	TATGCATGAGCTGTGTAAATTTTGTGAATATGTATTATATTAAAACCAGGCAACTTGGAATCCCTAAATTCTG	50	11	48	606	GNL3
chr3	+	72929150	72929197	G6334.1	TCCATGTCTTACTACTTTGACCGCGATGATGTGGCTTTGAAGAACTTT	11	2	3	144
chr3	+	101768971	101768999	G6344.1	TTTGTATATATGTAAATAACTTTATTCTG	17	5	17	229	CEP97
chr3	+	111993321	111993350	G6349.1	TTTTGTATCCTTTCACTGTAATAAATCATG	11	2	6	124	ABHD10
chr3	+	127605066	127605092	G6358.1	ATCCACCACCGCTTCAAGAACTTCCTG	20	2	16	81	MCM2
chr3	+	127606193	127606231	G6359.1	AGGCACCGGCGGAGCTGCTGCAGATCTTTGATGAGGCTG	10	2	2	51	MCM2
chr3	+	127617066	127617104	G6361.1	GGGCCCTGGTTCTGGCTGACCGAGGAGTGTGTCTCATTG	15	3	5	130	MCM2
chr3	+	128060561	128060595	G6366.1	ATATGGCCTTGGCTCTGGTATTTCTCTCTTCATTG	30	2	2	428	SEC61A1
chr3	+	129263929	129263978	G6375.1	CCCTGTGTCAGAAATATCCTCGCAAACACGCCGTCCTTATGAACTTCCTG	14	2	3	167	COPG1
chr3	+	131381871	131381913	G6380.1	TGCCACGCTCTCCTCTACGCGCCGGACCCTGGGATGCTCTTCG	10	2	2	98	NUDT16
chr3	+	141903644	141903693	G6387.1	TTTTTTATGGGTTCCTGGCTGCACTCTTCTCATTCACGATGTGGGTTATG	12	2	3	196	ATP1B3
chr3	+	141926010	141926041	G6388.1	CTTAATATGCCGTGCTATGTAAATATTTTATG	18	3	13	218	ATP1B3
chr3	+	179779625	179779669	G6401.1	TAGATGACCTGCTTCTGGGTCGGGGTTTTGTACGTAGCAGAGCAG	129	5	29	1310	USP13
chr3	+	184155718	184155741	G6408.1	TCACCTTGGCGGACTTTAAGGGCG	12	2	4	68	DVL3
chr3	+	184324289	184324327	G6426.1	ACAAAGATGATGATGAGGTTTTTGAGAAGAAGCAAAAAG	12	2	6	82	EIF4G1
chr3	+	184325696	184325725	G6428.1	TTCCTCTGATGACTTCCTGTTAGTGCCACG	66	3	4	698
chr3	+	184328934	184328980	G6434.1	TTGGGCAAAGCTGCTTCCCTGTTGCTGGAGATCCTGGGCCTCCTGTG	28	3	13	313	EIF4G1
chr3	+	184331774	184331800	G6435.1	CCCTCATGACGGCTGTCTGCTATTCTG	14	2	3	123	EIF4G1
chr3	+	184335222	184335271	G6438.1	AAAATCACTCTCGGGACTGCCGTCCTCGCTGCTGGGGGCATATGCCCCAG	13	3	10	91	EIF4G1
chr3	+	186572180	186572201	G6441.1	CTTCATCCCGACCGGAACCCTG	11	2	2	42	DNAJB11
chr3	+	186784798	186784863	G6442.1	GTGAAATGATGGCAATCATCTTTCGGGACTGACCTGAAATGAAGAGAATACTCATTGCTGATCACT	611	11	63	5492
chr3	+	186786323	186786348	G6443.1	ATGCAGGTACTGTTACAATACAACTG	54	2	2	376
chr3	+	186786786	186786822	G6445.1	TAAAGACTGGGGTGGACCTCTTTCTTAATGTCCAATG	32	2	2	317
chr3	+	186787328	186787366	G6446.1	CTAAGTGCTGTGTTGTCGTTCCCCCTGCTTAAAATAAAG	44	2	2	555
chr3	-	12836059	12836092	G6449.1	CAGCTCATGTGCACGTTTTCTGTTTAAATAAATG	19	3	3	219	RPL32
chr3	-	12840312	12840349	G6451.1	CTCCGTAGCTGGCGATTGGAAGACACTCTGCGACAGTG	340	6	23	2688	RPL32
chr3	-	20169534	20169568	G6455.1	ATGTCTATACTTGTATATACCTCTTTAAATTTTAG	20	5	26	299	SGO1
chr3	-	31955484	31955504	G6458.1	GGTGGCATTGCTGGGTAGCTG	617	3	1145	2555	OSBPL10
chr3	-	45089069	45089117	G6466.1	CGGTGGGAGGTGGAGTCTTACTGCTGTCTGCCCTCGGGCTCATCATTTG	31	3	3	335	CDCP1
chr3	-	46921763	46921806	G6475.1	TCTGTATATATGTATATATTTTGAACTTTCTAAAAAAAAATCTG	18	6	19	253	CCDC12
chr3	-	49132799	49132848	G6507.1	AAAGAGGGAGGGGACAGCCTCTGCCCTGGGAACTTCGACTGGGCCTACTG	13	2	2	102	LAMB2
chr3	-	49362507	49362545	G6510.1	ATCTTCGGAATGATGAGCACACAAGGCGGGAGCTAGCCA	35	2	2	181	RHOA
chr3	-	51694463	51694500	G6518.1	ATGGGAGACTGCCTGGAATACCGGGTGCTGTAGGCTTT	507	7	350	3833
chr3	-	52254480	52254512	G6524.1	TTATTCTGTATATACAATTTTATGTCCCTTTTG	113	8	115	1313	WDR82
chr3	-	52268336	52268357	G6525.1	TGAGGTAGTAGTTTGTACAGTT	151	4	25	1326
chr3	-	52545466	52545495	G6526.1	TTTATTCTAATTTCTGTATCATATCATCTG	11	2	12	164	PBRM1
chr3	-	53230457	53230478	G6533.1	CTACATTGCTGAGCAGAACATG	7	2	12	23	TKT
chr3	-	53233219	53233257	G6534.1	TGGATGGACACAGCGTGGAGGAGCTGTGCAAGGCCTTTG	38	4	8	252	TKT
chr3	-	88868453	88868471	G6543.1	AAAAGGTGTTGGTTGATAG	152	3	6	906
chr3	-	96617919	96617947	G6548.1	CAAAATAGTGGGAAGATTTATAGGTAGAG	94	2	2	615	MTRNR2L12
chr3	-	96618391	96618429	G6550.1	TACACACCGCCCGTCACCCTCCTCAAGTATACTTCAAAG	310	4	4	1610
chr3	-	96618432	96618458	G6550.2	TGCTTAGTTGAACAGGGCCCTGAAGCG	1785	6	32	9658
chr3	-	98797255	98797285	G6554.1	TTTTTTTTTTAAGAGGGGCAAGTGTTTTCTG	15	2	5	214	DCBLD2
chr3	-	101576559	101576585	G6562.1	AGGGCTGCGTCACTTCTGGGGCCTTCG	60	2	2	417
chr3	-	119824176	119824199	G6568.1	CTTGTACATTATATTTTCTTTCTG	11	3	12	142	GSK3B
chr3	-	125227236	125227280	G6578.1	ACCTTTTCTCAATCACTGTAAATTTTTATTTTCTATTTCCTATTG	13	10	17	295	ZNF148
chr3	-	128626743	128626772	G6585.1	ATTCTCTGACTGTGAAGATCATCCTGCCTG	30	2	2	285	RPN1
chr3	-	132229139	132229171	G6597.1	GGGGGTGTAGCTCAGTGGTAGAGCATTTGACTG	27	2	3	232	CPNE4
chr3	-	152920885	152920903	G6603.1	GTGTAGTGGTGAAATGTGG	26	2	51	105
chr3	-	160515031	160515068	G6610.1	GTGATGCTGATATTGGAGTGCATCTGAGGCTGTTGTAG	53	2	6	452
chr3	-	160515193	160515226	G6611.1	GAAATAGAGATAATTGGGTGTTGAATGTTGTATG	35	4	8	296
chr3	-	180161893	180161921	G6622.1	CAGGGTCGGGCCTGGTTAGTACTTGGAAG	108	2	2	754
chr3	-	181822871	181822891	G6623.1	AATACCGGGTGCTGTAGGGTT	30	2	2	166
chr3	-	185417857	185417906	G6626.1	AATCTTGAAAAGCCCAGAGATCCAAAGAGCCCTTTGAGCACCACGCAAGA	16	2	12	50
chr3	-	185418019	185418051	G6627.1	GTGGGCATGTGGGACGTTTCTGCATTTGGACTG	18	2	2	155
chr3	-	185418487	185418529	G6629.1	ACTCACCGCTCTGGCCAGGGTGCTTTTGGAAACATGTGTCGTG	41	2	2	350
chr3	-	194402996	194403043	G6631.1	TTTTTGTATATTTATGGTGGGAGGTGGTTGGGAACTTTTAACAAAATG	10	2	6	150	ATP13A3
chr3	-	194403599	194403633	G6632.1	ACCTAAATTTTAAAATCTGTACATATATTATTTTG	16	5	29	217	ATP13A3
chr4	+	1980595	1980621	G6645.1	CGTGGGGTTCAGGGGTGTGTGGCCCTG	11	2	2	75	NSD2
chr4	+	6997114	6997139	G6658.1	CTCCATGTGCGTCCCTCCCGAAGCTG	21	2	5	121
chr4	+	7582514	7582558	G6659.1	TTCGTGGGGAACCTGGCGCTAAGCCATTCGTAGATGACCTGCTTC	441	9	42	2356	SORCS2
chr4	+	7582563	7582636	G6659.2	TCGGGGTTTCATATGTAGCAGAGCAGCTCCCTCGCTGCAATCTATTGAAAGTCAGCCCTCGACACAAGGGTTTG	313	5	15	1945	SORCS2
chr4	+	26432932	26432966	G6664.1	CCACTGTAAATATTCTTCCTAACATCTTTAAATCG	24	4	21	288	RBPJ
chr4	+	57031118	57031141	G6675.1	CTTTTCTTCTGTAAATATATAATA	52	4	51	573	POLR2B
chr4	+	74381102	74381134	G6685.1	CATCTATCTGGTGGACATGAGTCAAAACTACTG	20	2	6	172	EREG
chr4	+	74445299	74445348	G6687.1	AGACCGAGTTGCCCCAGAGACCGAGACGCCGCCGCTGCGAAGGACCAATG	75	2	4	249	AREG
chr4	+	74452611	74452640	G6690.1	AATGGAAATGTACATGCTATAGCATAACTG	11	3	12	74	AREG
chr4	+	74454935	74454962	G6692.1	TTGTAAATAATTTATTTAATATTTAATG	26	2	26	364	AREG
chr4	+	75886034	75886064	G6693.1	TGAGACAGGTTAGTTTTACCCTACTGATGAT	273	8	25	2533
chr4	+	75886066	75886095	G6693.2	TGTTGTTGCCATGGTAATCCTGCTCAGTAC	474	8	33	4388
chr4	+	75886183	75886206	G6694.1	CCTCTAAGTCAGAATCCCGCCCAG	415	4	8	1652
chr4	+	75886492	75886538	G6695.1	AGCAGCTCCCTCGCTGTGATCTACTGAAAGTCAGCCCTCGACACAAG	46	3	12	225
chr4	+	85100750	85100774	G6698.1	AACGTAGGGTAGTCAAGCTTCCAAG	17	2	2	60
chr4	+	87892627	87892652	G6701.1	TAAGGATAAGAAGAAGAAAACTAAGA	57	2	2	124
chr4	+	87892810	87892837	G6702.1	AGAAGGTCAGTTGGAATTCAGGGCATTG	12	2	3	75
chr4	+	87892978	87893023	G6703.1	TGTGGTTGACTCTGAGGATCTGCCCCTGAACATCTCCCGAGAAATG	25	3	4	206
chr4	+	105484738	105484772	G6710.1	TAGATTCGGGCAAGTCCACCACTACTGGCCATCTG	19	4	5	119
chr4	+	105484857	105484893	G6711.1	TATGCCTGGGTCTTGGATAAACTGAAAGCTGAGCGTG	11	2	2	91
chr4	+	105485637	105485664	G6712.1	TCTGTCAAGGATGTTCGTCGTGGCAACG	12	2	6	65
chr4	+	105485989	105486027	G6713.1	TTGCGGTGGGTGTCATCAAAGCAGTGGACAAGAAGGCTG	11	2	2	63
chr4	+	118279189	118279215	G6718.1	TCTCCATGTATCTTTGGGACCTGTCAG	240	6	7	2164	SNHG8
chr4	+	119237501	119237522	G6720.1	ATCTATTGAAAGTCAGCCCTCG	295	2	4	1709	USP53
chr4	+	121816869	121816895	G6721.1	TATATCTGTATATATAACTATTAAAAG	19	2	15	180	EXOSC9
chr4	+	127885967	127886016	G6722.1	TATGTTTTATACATTACTTATCGGGAGACCACCCTTCGACACTGACACAG	10	2	6	144	PLK4
chr4	+	135046129	135046162	G6725.1	CCAGTGGAACCACGCTGCTTGAGGCTCTGGACTG	11	2	2	73
chr4	+	143536554	143536588	G6726.1	TAATCATCCATATCTCTTTGATGGAGCAGAACCTG	14	3	6	148	SMARCA5
chr4	+	151103827	151103862	G6728.1	AATAAGTGATGAAAAAAGTTTCGGTCCCAGATGATG	233	3	13	1942
chr4	+	164189893	164189939	G6730.1	TATTCTTCGAGTGACAGCTGAAGACAAGGGTACAGGGAACAAAAATA	32	2	5	140
chr4	+	164190092	164190138	G6731.1	AATCAGATTGGAGATAAAGAAAAGCTGGGAGGTAAACTTTCCTCTGA	23	4	8	190
chr4	+	166142601	166142634	G6733.1	AATATTCAAATGAGAACTTTGAAGGCTGAAGAGG	56	3	29	339
chr4	+	189473768	189473800	G6734.1	AAAAGAAGGATGGTGACAAGAAGAAGAAGAAGA	34	2	2	54
chr4	-	10075296	10075347	G6754.1	AATCAGGGACTAGAGTTTAACTGCAGCGGAACATGTCATTTCTCTATTTCTG	22	3	11	178	WDR1
chr4	-	15681420	15681446	G6760.1	ACTGCTGCGGATTAAGGAGGCCTTTCG	16	3	3	109	FBXL5
chr4	-	24556311	24556333	G6764.1	ATGAGGCTCATGAGAGGACACTG	18	2	2	67	DHX15
chr4	-	69430948	69431000	G6775.1	TGTGTAACAACTCACCTGCCGAATCAACTAGCCCTGAAAATGGATGGCGCTGG	7059	9	140	44448
chr4	-	77048260	77048288	G6785.1	CACTGATTTATCAAGACAAGAGGGACATG	27	2	3	141	CCNI
chr4	-	82895854	82895881	G6792.1	TTGTGATTAATGTATGTGGATGAGGACA	68	3	4	666	SEC31A
chr4	-	85512010	85512030	G6795.1	GAGTAGAATGGCCTCTAGTGC	178	2	179	711
chr4	-	101063331	101063354	G6805.1	CAGTATTGAAGTATGAGAACAATG	14	2	3	81	PPP3CA
chr4	-	102796946	102796976	G6806.1	CCTTCCACTGTTAGAGATTTGAGGTTACATG	20	3	9	199	UBE2D3
chr4	-	163128783	163128812	G6828.1	ATTTTTAAAAACACTGTAAAATACTAAATG	15	2	13	125	NAF1
chr4	-	177659765	177659837	G6832.1	TATGCATGAGCTGTGTAAATTTTGTGAATATGTATTATATTAAAACCAGGCAACTTGGAATCCCTAAATTCTG	46	10	26	515	GNL3
chr4	-	186588380	186588407	G6835.1	TTTTCATCGGCTGTGCCATTTCCCAACG	37	3	8	362	FAT1
chr4	-	186588714	186588741	G6836.1	TACGCCTCCACCGCCTCCTGCTCTGACG	25	2	2	145	FAT1
chr4	-	186588785	186588829	G6837.1	TACTTGTAGAGAACCCCATGCCCCTTACCCGCCAGGGTATCAAAG	16	2	3	97	FAT1
chr4	-	186596955	186596994	G6840.1	AATTGGAATCGTTGTGTTTGTTGCAGGGATATTTTTACTG	41	6	8	560	FAT1
chr4	-	186597684	186597763	G6842.1	AACCCTGTAAGAATGGCGGAACATGCTTTGACAGTTTGGATGGCGCCGTTTGTCAGTGTGATTCGGGTTTTAGGGGAGAA	91	4	6	458	FAT1
chr4	-	186601307	186601349	G6845.1	AAACTGACCATGAGGCTCAGAACATATTCCACGCATGCGGTTG	10	2	7	74	FAT1
chr4	-	186603270	186603310	G6847.1	CGGGACTGGACTGCCCCTGGAAGTTCTGCGATGAAAAGGTG	48	2	2	278	FAT1
chr4	-	186611461	186611493	G6854.1	TTCTTCAAGTGTATGCAGCAAGTCGGGATATTG	23	2	6	182	FAT1
chr4	-	186611497	186611529	G6854.2	CCACCGTGTCTGAGGACATTCTTGTTGGAACTG	20	3	3	152	FAT1
chr4	-	186613273	186613309	G6858.1	AGGAGCAAGCTGTTTATCATCTTCTCGTCAGGGCCAC	30	3	6	244	FAT1
chr4	-	186617741	186617785	G6860.1	GTGGGGTGATTGCCATCTTAAGTACCACGGATGCTGATTCTGAAG	16	2	6	141	FAT1
chr4	-	186618527	186618563	G6863.1	GCTGTGGATAATGGGTCTCCATCAAAAGAATCTGTTG	33	2	4	216	FAT1
chr4	-	186619397	186619451	G6867.1	GACGTTACCGACCTCAATGATAATCCACCACTCTTTGAACAACAGATTTATGAAG	104	5	7	876	FAT1
chr4	-	186619532	186619579	G6868.1	ACAGCAGCACTGGCCTCATCTCACTACTCAGAACCCTGGATTACGAGC	61	3	6	484	FAT1
chr4	-	186620412	186620443	G6871.1	ATGTGGTTGTAGAAGTGACAGAGGAACATAAG	11	2	5	72	FAT1
chr4	-	186620681	186620707	G6873.1	CCGGCCTTACCTCTGTCAAAATTAATG	29	2	3	229	FAT1
chr4	-	186636596	186636626	G6879.1	TCCAAGAGGTTTTCAGCAGCTGGAGAATATG	38	2	3	271	FAT1
chr4	-	186663452	186663478	G6884.1	ACAATGCACCACAGACATCAGAGCCTG	14	2	5	29	FAT1
chr4	-	186708817	186708851	G6891.1	ACAGTCATCCTTTCGGCTACAATCTCACACTACAG	16	2	5	139	FAT1
chr4	-	186709773	186709806	G6895.1	CTCCTGCTTCTGCTCCTTCTCTTCCAACATTTTG	18	2	2	268	FAT1
chr5	+	10250322	10250352	G6902.1	TAATTCCGGTTGTTGCACCATGGCGTCCATG	23	2	24	178	CCT5
chr5	+	10258224	10258264	G6906.1	TGGGCGGCAGGCTGGAGGACACTAAACTGATTAAGGGCGTG	30	2	4	122	CCT5
chr5	+	10261633	10261679	G6907.1	CTGGTCTTGTACAGGAGATCTCATTTGGGACAACTAAGGATAAAATG	11	2	3	140	CCT5
chr5	+	15452056	15452079	G6913.1	TTTAATACCCTGTACATATCTTTG	14	4	7	143
chr5	+	28708335	28708371	G6916.1	AATAGCTTCTGTCCCTCTGCTTTCCCTTTTCCATTTG	14	2	5	227
chr5	+	33448672	33448718	G6917.1	TAAACAGGTTGATGCGGAATCTTGGAAAACTACACCATATCAAATTG	10	2	2	118	TARS
chr5	+	69177685	69177703	G6930.1	CCATCTGTACATATTACTG	19	2	15	118	CCNB1
chr5	+	71850945	71851050	G6932.1	AAGCCGGCGGGAGCCCCGGGGAGAGTTCTCTTTTCTTTGTGAAGGGCAGGGCGCCCTGGAATGGGTTCGCCCCGAGAGAGGGGCCCGTGCCTTGGAAAGCGTCGCG	1679	17	52	9143
chr5	+	71851052	71851087	G6933.1	TTCTGGCGGCATCCGGTGAGCTCTCGCTGGCCCTTG	548	8	135	3930
chr5	+	71851088	71851107	G6933.2	AAAATCCGGGGGAGAGGGTG	79	2	3	138
chr5	+	75361328	75361368	G6936.1	TAAACTGTATCAAATCTGTATATGTTGTAATAAAACTTATG	40	7	39	509	HMGCR
chr5	+	77030463	77030504	G6937.1	ACTGCTTATCCGACGCTCCTCCCTCTGTCTCTGTAGCTGGAG	10	2	2	128	AGGF1
chr5	+	96765234	96765263	G6944.1	ACCTCGATGATGCCTTGGATAAACTCTCTG	15	2	2	133	CAST
chr5	+	112161583	112161617	G6945.1	ATACCTTTGGTGTAGGAGCTGCATAAGTAACAGTT	118	4	5	1208
chr5	+	123655086	123655106	G6950.1	TGGGGGGCCCAAGTCCTTCTG	255	4	12	1234
chr5	+	134390644	134390669	G6959.1	TAAATCTGTACTTTTTTCAAATATTG	14	2	14	168	UBE2B
chr5	+	138824560	138824583	G6968.1	ATGGCTGCAGCTAGAGGAATCCTG	18	2	10	80	CTNNA1
chr5	+	139278780	139278810	G6972.1	ATCCAGCGGTTGTCAGCTATCCAGGCTCATG	39	2	4	295
chr5	+	139278902	139278929	G6973.1	TACCTTTGGGCAGTGTTTTGCACCTCTG	175	6	15	1889
chr5	+	140243469	140243504	G6979.1	CCTGCCCCCATCTCTTCTGATTGCTGTTAACAAATG	13	2	2	154	CYSTM1
chr5	+	140718956	140718976	G6983.1	TACATTGTAACCACCTCTCTG	6	2	6	33
chr5	+	154055000	154055026	G7000.1	CTTCAACTGTATATAATAAACACTTAT	24	2	24	216	MFAP3
chr5	+	154875761	154875784	G7006.1	TAAAATGTATATAACTCTTACCTG	13	2	10	105	CNOT8
chr5	+	155408685	155408717	G7009.1	AAAGCAGGGCCTCATGATCCTTCTGACCTTTTG	165	5	69	1574
chr5	+	160485372	160485392	G7015.1	TGAGAACTGAATTCCATGGGT	69	3	3	411	MIR3142HG
chr5	+	171387897	171387932	G7018.1	TTCTTTTATCTCCGTCCGCCTTCTCTCCTACCTAAG	18	2	7	221	NPM1
chr5	+	175523855	175523888	G7020.1	TATGTTTGGCTTCTTGAGGTCTCTGGCTCCTCAG	18	2	2	250	SFXN1
chr5	+	177592259	177592301	G7029.1	AACCGGGCTGGGTAGAGTGATGCGGACCCTCCTGCTGGTGCTG	29	2	11	181	TMED9
chr5	+	178205922	178205954	G7038.1	TTGACTGTACAATAAAAATGGATCCCAACACTG	17	3	6	59	HNRNPAB
chr5	+	179705700	179705748	G7039.1	CTGTGTATGTTACTGGTGCTTGGAACTGCTATTGTTGAGGCTCATGATG	37	4	6	454	CANX
chr5	+	179708327	179708376	G7041.1	CTCTGCTAAACTGAACAAGCCCTTCCTGTTTGACACCAAGCCTCTCATTG	30	3	8	167	CANX
chr5	+	179716177	179716222	G7043.1	ACATGACTCCTCCTGTAAATCCTTCACGTGAAATTGAGGACCCAGA	40	2	3	189	CANX
chr5	+	181187745	181187766	G7055.1	TCTCTTCGGGGGCGTGGGTTCG	42	2	3	288
chr5	-	821236	821263	G7057.1	TTGCTGCCTGGCTACCTTCCCATCTCTG	10	2	11	89
chr5	-	1334319	1334349	G7059.1	AATTTTTGTAGATACCAACTTATACTTCCTG	25	2	12	177	CLPTM1L
chr5	-	14652047	14652077	G7067.1	ACTATCCACCTTTGGGTCGCTTTGCTGTTCG	23	2	3	242
chr5	-	14653235	14653277	G7074.1	ATTCGGGCAAGTCCACCACTACTGGCCATCTGATCTATAAATG	73	2	2	576
chr5	-	34908570	34908603	G7081.1	TAAATCCATTTTGTAGAGGGCATGTAAATAAATG	11	3	8	110	RAD1
chr5	-	37310569	37310612	G7082.1	TTTACATTTACAGGATATCTGCCCACTTCTATATAGCACTGATG	12	2	5	183	NUP155
chr5	-	40832690	40832717	G7083.1	TAAAAATAAATGTCTGAACATATGAATG	96	3	7	730
chr5	-	43495477	43495513	G7086.1	TCTGTCAAGGATGTTCGTCGTGGCAACGTTGCTGGTG	23	2	2	194
chr5	-	43495651	43495674	G7087.1	TTCCTGTTGGCCGAGTGGAGACTG	30	2	2	176
chr5	-	43496308	43496336	G7088.1	AAAAATTTGAGAAGGAGGCTGCTGAGATG	22	2	2	98
chr5	-	56504883	56504909	G7090.1	TTCAGGTTGTACGTGGACACTATAAAG	14	2	2	110
chr5	-	56919683	56919708	G7091.1	ATTTTAATATTTGTACATAAACACTG	14	3	15	139	MIER3
chr5	-	60743786	60743833	G7094.1	CTGCTGGAGGGCGAGGAGAGCCGGCTGGAGTCTGGGATGCAGAACATG	41	3	5	201
chr5	-	66129366	66129395	G7095.1	ATGTGTTGTTGCCATGGTAATCCTGCTCAG	5965	11	135	61404
chr5	-	80650610	80650635	G7104.1	TAAATTTAACTGTTAGTCCAAAGAGG	57	2	2	454	DHFR
chr5	-	80651202	80651241	G7106.1	TACACACCGCCCGTCACCCTCCTCAAGTATACTTCAAAGG	336	4	4	1718	DHFR
chr5	-	80651466	80651506	G7108.1	TAATCGATAAACCCCGATCAACCTCACCACCTCTTGCTCAG	582	5	10	3279	DHFR
chr5	-	80651507	80651568	G7108.2	CCACAGCTTAAAACTCAAAGGACCTGGCGGTGCTTCATATCCCTCTAGAGGAGCCTGTTCTG	974	9	23	9220	DHFR
chr5	-	82276068	82276096	G7112.1	AAAACACTGTAGTAATAAATTTTCATATG	20	4	18	155	RPS23
chr5	-	86372854	86372886	G7114.1	GCATTGGTGGTTCAGTGGTAGAATTCTCGCCTG	270	7	11	2959	VAC14
chr5	-	87412815	87412841	G7116.1	TTTGGGTTCTCGTCTGCAGACCCTCTG	14	3	5	135	CCNH
chr5	-	98392087	98392108	G7121.1	AAGCTGGTGTCTGAGTCCTCTG	12	2	3	81
chr5	-	109699732	109699779	G7127.1	ATTCGGCTGATCTGGCTGGCTAGGCGGGTGTCCCCTTCCTCCCTCACC	34	2	2	305
chr5	-	115391310	115391341	G7130.1	CTTTTGGAGTACATGGGCAATGCTGGATGTAA	14	2	26	97
chr5	-	115391739	115391762	G7131.1	ATGGCTGCAGCTAGAGGAATCCTG	33	2	7	158	CTNNA1
chr5	-	123401117	123401168	G7134.1	GAAGCTGCTGGAGGGCGAGGAGAGCCGGCTGGAGTCTGGGATGCAGAACATG	78	3	5	418
chr5	-	133972480	133972525	G7141.1	TTTCTTTTTTATCTAGAAATGGCTGCAAGTGGAAGCGGATAATATG	11	2	2	164	VDAC1
chr5	-	134927995	134928020	G7152.1	TCCCAACAATTATATTACTACCACTG	69	2	2	550
chr5	-	136080537	136080584	G7157.1	CTCAAGCGGTTACCTCCTCATGCCGGACTTTCTATCTGTCCATCTCTG	329	8	46	3496
chr5	-	138561037	138561071	G7166.1	AACGTGTGGAAAACTAATGACTGAGCACAAACCTG	399	3	15	1998	HSPA9
chr5	-	140677702	140677731	G7171.1	ATGGGATGTTTGCTATCTGTGGTGTTTCTG	18	2	2	241	HARS
chr5	-	141575032	141575074	G7179.1	AAGCTTCAAGATCTTCAGGGAGAAAAAGATGCACTGCATTCTG	24	2	2	109	DIAPH1
chr5	-	149496058	149496092	G7190.1	ATAAATGTAATCACTGTAAACATCTATATGATCTG	27	3	33	222	CSNK1A1
chr5	-	157502890	157502922	G7200.1	CAGTCAGGTGGTGGAATGTGTCTCTCCAACATG	11	2	2	97	ADAM19
chr5	-	171863348	171863392	G7206.1	CTTGCCTCCTAATTTAAAATACTGTATTCGCATGTAGATATAATG	10	2	11	159	FBXW11
chr5	-	175115065	175115127	G7210.1	ACAGCTCTTTCTCGATTCTGTGGGTGGTGGTGCATGGCCATTCTTAGTTGGTGGAGTGATTTG	51	6	24	597
chr5	-	181221995	181222021	G7232.1	ACTCTTAATCTCAGGGTCGTGGGTTCG	120	2	3	1032
chr5	-	181239084	181239150	G7238.1	AAGACCAACCACATTGGCCACACAGGCTATCTGAACACGGTGACTGTCTCTCCAGATGGATCCCTCT	51	3	3	310	RACK1
chr5	-	181241531	181241589	G7240.1	TGGCCTTCTCCTCTGACAACCGGCAGATTGTCTCTGGATCTCGAGATAAAACCATCAAG	69	3	5	495	RACK1
chr5	-	181241809	181241862	G7241.1	CCAATCCCCAAGTGGGAGTGAGGACATGTCCTGCAATTCTGAAGGGATTCTCTG	1712	8	36	11233
chr5	-	181241867	181241889	G7242.1	CCTGGTGATGACAGATGGCATTG	75	3	6	434
chr5	-	181243312	181243345	G7245.1	TCGGTGCTGAAATCCAGAGGCTGTTTCTGAGCTG	210	7	12	1995	RACK1
chr5	-	181243694	181243740	G7247.1	ATCGCTACTACCCCGCAGTTCCCGGACATGATCCTCTCCGCCTCTCG	35	3	3	275	RACK1
chr6	+	4428038	4428083	G7251.1	TACTTGGATGGGAGACCGCCTGGGAATACCGGGTGCTGTAGGCTTA	17150	9	390	119785
chr6	+	7109687	7109715	G7254.1	TTACTGGTTAGGAGATAGAACGTGAGCCC	10	2	12	58	RREB1
chr6	+	15011926	15011944	G7266.1	GATGAGTAGGCAGGCGTGG	46	2	46	92
chr6	+	24976994	24977025	G7272.1	TTTTATCTTAACCACCAGATCATTCCTTCTGT	10	2	3	109
chr6	+	26104267	26104281	G7274.1	AATACGCGGTCTCCT	13	2	2	50	HIST1H4C
chr6	+	26156683	26156717	G7280.1	GCACCGGCGCGTCGGGTTCCTTCAAACTCAACAAG	47	2	3	276	HIST1H1E
chr6	+	26158206	26158242	G7282.1	AAGGGCTCCAAGAAGGCGGTGACTAAGGCTCAGAAGA	160	2	6	436	HIST1H2BD
chr6	+	27158126	27158162	G7299.1	TGCCGTGATCGTATAGTGGTTAGTACTCTGCGTTGTG	417	12	129	4958
chr6	+	27295451	27295468	G7300.1	TTAGCACTCTGGACTCTG	12	2	2	70
chr6	+	27810185	27810222	G7304.1	AAGCCCCATCGCTATCGGCCTGGTACAGTGGCTCTCCG	68	2	13	517	HIST1H3H
chr6	+	28982222	28982271	G7309.1	ATTCGGCGCTCTCACCGCCGCGGCCCGGGTTCGATTCCCGGTCAGGGAAT	49	3	11	223
chr6	+	30591296	30591316	G7316.1	AAAGGAGTTGCTGCCGACCTG	14	2	2	54	ABCF1
chr6	+	30722595	30722636	G7319.1	ACAGCGACCTGCAGCTGGACCGCATCTCTGTGTACTACAATG	56	2	2	344	TUBB
chr6	+	30722930	30722977	G7320.1	TTCCTCGTGCCATCCTGGTGGATCTAGAACCTGGGACCATGGACTCTG	26	4	12	195	TUBB
chr6	+	30723443	30723479	G7321.1	TGACTGCCTGCAGGGCTTCCAGCTGACCCACTCACTG	48	2	2	168	TUBB
chr6	+	30724002	30724041	G7323.1	GCTGCTGTCTTCCGTGGTCGGATGTCCATGAAGGAGGTCG	33	2	2	230	TUBB
chr6	+	30724169	30724208	G7324.1	CAATAGCACAGCCATCCAGGAGCTCTTCAAGCGCATCTCG	13	2	8	58	TUBB
chr6	+	30724429	30724472	G7326.1	TTCCCTTAGCCGTCTTACTCAACTGCCCCTTTCCTCTCCCTCAG	28	2	16	394	TUBB
chr6	+	30724741	30724771	G7327.1	AAAACACATGTAGATAATGGCCATCATCCTA	10	3	8	56	TUBB
chr6	+	30894536	30894557	G7333.1	ACGGTTCACCTCTCTGTCCCTG	12	2	2	82	DDR1
chr6	+	31627840	31627886	G7344.1	TCGTCATCTGAGATTTCCCTGGCAGTGGAGCGGGCCCGGCGACGGCG	29	2	5	148	PRRC2A
chr6	+	31835296	31835323	G7366.1	TCGCTGATGCCATCACCGCAGCGCTCTG	951	6	25	5663	C6orf48
chr6	+	31837064	31837110	G7367.1	ATCTCCCTAATTGGGAATGATGATTTCACAGACTAGAGTCTCCGATG	586	7	46	4983	C6orf48
chr6	+	31837114	31837141	G7368.1	GTCATGATGTCAAAACTAAGTTCTGACT	454	5	18	3987	C6orf48
chr6	+	33199601	33199633	G7373.1	GGCTGGTCCGATGGTAGTGGGTTATCAGAACTT	36	3	4	301
chr6	+	33658694	33658726	G7379.1	TACCTGACAGTGAACAAGCGGCTTCCGGCCTTG	24	2	4	156	ITPR3
chr6	+	33683365	33683386	G7384.1	TGGGACTACAAGAACATCATTG	11	2	3	52	ITPR3
chr6	+	34245230	34245284	G7392.1	CTCTCTGGGCTTTTGGTTTGGGGGCGCCCTCTCTGCTCCTTCACTGTTCCCTCTG	193	11	22	3085	HMGA1
chr6	+	34245873	34245917	G7396.1	TTCAATGTTCCATTCTTCGACATCCGTCATTGCTGCTGCTACCAG	25	2	3	332	HMGA1
chr6	+	35470637	35470675	G7404.1	TATAACATTCACCTGGCTGTCAACTTCTTGGTGTCATTG	11	2	2	155	RPL10A
chr6	+	36685903	36685939	G7414.1	TGTTTTAATTTAAACACCTCCTCATGTACATACCCTG	44	6	25	556	CDKN1A
chr6	+	36686000	36686040	G7415.1	AATGAGAGGTTCCTAAGAGTGCTGGGCATTTTTATTTTATG	15	4	5	234	CDKN1A
chr6	+	41789771	41789815	G7425.1	CCTCTATTCTGTAAAGTTCTGTACATAGTTCCCAAGCTTCTGCAG	46	5	41	477	AL365205.1
chr6	+	43011875	43011896	G7428.1	TATAGGCTGTGGACAATAACTG	32	2	3	189	PPP2R5D
chr6	+	43129169	43129213	G7429.1	ACCGGCTGCAGGACTCTGGCACCTTCCAGTGTGTGGCTCGGGATG	37	2	2	283	PTK7
chr6	+	44233808	44233844	G7440.1	CAGGCCAGTGGAGGCTCTTGGGCTTGGAGAACACGTG	11	2	3	70	SLC29A1
chr6	+	44233971	44233995	G7441.1	CCTCCTCCTCTGTGTTCTCTCCATG	12	2	3	117	SLC29A1
chr6	+	44247107	44247151	G7442.1	AGTCACTCCGGCGCAGTGTTGGGACTGTCTGGGTATCGGAAAGCA	111	4	6	851	HSP90AB1
chr6	+	44249394	44249442	G7444.1	CTATGAGAGCCTGACAGACCCTTCGAAGTTGGACAGTGGTAAAGAGCTG	72	3	3	461	HSP90AB1
chr6	+	44249685	44249734	G7445.1	ACATCTCCATGATTGGGCAGTTTGGTGTTGGCTTTTATTCTGCCTACTTG	35	5	19	515	HSP90AB1
chr6	+	44250418	44250453	G7448.1	ATGACAGCGGTAAGGATAAGAAGAAGAAAACTAAGA	152	3	7	465	HSP90AB1
chr6	+	44250543	44250590	G7448.2	TATGGAGAATTCTACAAGAGCCTCACTAATGACTGGGAAGACCACTTG	64	2	2	379	HSP90AB1
chr6	+	44251069	44251123	G7449.1	TTGGAATTCAGGGCATTGCTATTTATTCCTCGTCGGGCTCCCTTTGACCTTTTTG	56	4	6	702	HSP90AB1
chr6	+	44251439	44251476	G7450.1	ACTCTGAGGATCTGCCCCTGAACATCTCCCGAGAAATG	21	2	5	137	HSP90AB1
chr6	+	44252068	44252135	G7452.1	TATATATGACCGAGCCCATTGACGAGTACTGTGTGCAGCAGCTCAAGGAATTTGATGGGAAGAGCCTG	128	7	9	801	HSP90AB1
chr6	+	44252143	44252190	G7452.2	TTACCAAGGAGGGTCTGGAGCTGCCTGAGGATGAGGAGGAGAAGAAGA	137	3	5	722	HSP90AB1
chr6	+	44253252	44253281	G7453.1	AATGATAAGGCAGTTAAGGACCTGGTGGTG	26	2	3	130	HSP90AB1
chr6	+	44253591	44253625	G7454.1	TCGATTAGGTTAGGAGTTCATAGTTGGAAAACTTG	55	4	6	355	HSP90AB1
chr6	+	44253628	44253667	G7454.2	CCCTTGTATAGTGTCCCCATGGGCTCCCACTGCAGCCTCG	28	3	7	208	HSP90AB1
chr6	+	52995633	52995669	G7458.1	ATCTGGCTGCGACATCTGTCACCCCATTGATCGCCAG	29	2	2	156
chr6	+	52995675	52995723	G7458.2	ATTCGGCTGATCTGGCTGGCTAGGCGGGTGTCCCCTTCCTCCCTCACCG	56	4	5	533
chr6	+	52995852	52995899	G7458.3	CTCTCAAGGTCCATTTGTAGGAGAACGTAGGGTAGTCAAGCTTCCAAG	130	4	8	1048
chr6	+	61574167	61574214	G7460.1	AACTCGGCAAATCTTACCCCGCCTGTTTACCAAAAACATCACCTCTAG	18	3	3	125
chr6	+	71585184	71585215	G7464.1	CCCGTCTGGCTGCAGATGACTTCCGAACCAAG	22	2	3	121
chr6	+	73520061	73520110	G7466.1	AATGGAAGAAAAAAACTTTGAACCACTGTCTGAGGCTTGAGAATGAACCA	1887	9	66	12500
chr6	+	89084341	89084384	G7474.1	TATTATATTTTATATTTTGTAAATACTGTATACCATGTATTATG	23	6	24	438	PNRC1
chr6	+	94344899	94344921	G7477.1	TTTTCTGTACATAAAAATAATTG	11	2	10	93	RPL7A
chr6	+	97708804	97708838	G7478.1	AACTCTGTACATTTTAACATAAAAAATAAATTATG	14	5	16	152	AL589740.1
chr6	+	120262299	120262348	G7481.1	GAGAACTTTGAAGGCCGAAGTGGAGAAGGGTTCCATGTGAACAGCAGTTG	10773	8	833	79638
chr6	+	120686660	120686707	G7482.1	TCTGATCTCGGAAGCTAAGCAGGGCCGGGCCTGGTTAGTACTTGGATG	81	3	3	675
chr6	+	132815319	132815367	G7484.1	ACTTTAATTGTCGGATACCCCTTCACTCCTTTTATGAGTGAAACATAAG	46	3	5	401
chr6	+	132816804	132816839	G7485.1	TGTACATGATGACAACTGGCTCCCTCTACTGAACTG	763	7	51	6553
chr6	+	132816848	132816872	G7485.2	AAACTGCCATGTCACCCTTCTGATT	72	2	2	486
chr6	+	133272825	133272851	G7487.1	TAAAGTGAATGATTAAAGGTCTTGGGG	13	2	14	80	EYA4
chr6	+	133272942	133272967	G7488.1	TGGGCCACTTTTGGTAAGCAGAACTG	31	3	3	177	EYA4
chr6	+	144216593	144216613	G7492.1	ACATATGTCCGCGTGGGTTCG	114	3	8	676
chr6	+	144928597	144928623	G7494.1	ATTAACCCTGTGAATTTCCTTCCCCTG	15	2	15	135
chr6	+	151349538	151349568	G7504.1	GAGCAAGTCAGTGGCTCGCAGGGACCTTCTG	46	2	3	242	AKAP12
chr6	+	151349707	151349736	G7505.1	CAGGGTCTGTGCCAGCTGAAGAATTGGTTG	12	2	2	66	AKAP12
chr6	+	151349850	151349880	G7506.1	AAGGTGCTGTCCAAACCCCCCGAAGGCGTTG	12	2	2	46	AKAP12
chr6	+	151352211	151352256	G7517.1	AAAACCAAAGACGTACCATTTTTCGAAGGACTTGAGGGGTCTATAG	22	3	3	166	AKAP12
chr6	+	151352311	151352352	G7517.2	AAGGGACAGAAGAAGCTGAATGTAAAAAGGATGATGCTCTTG	31	2	2	139	AKAP12
chr6	+	151356069	151356113	G7528.1	TTTTAAGTAGTCCTCCTGTATCTATTGTATATTTTTTTCTTAATG	105	12	125	2079	AKAP12
chr6	+	151356556	151356594	G7530.1	AAAAGAATTGTTGTAAGTTTTTGATTCTACTCTTATATG	22	5	16	350	AKAP12
chr6	+	154190333	154190354	G7532.1	AAAATTAATAAATTCTGAGCAG	227	4	6	1356	OPRM1
chr6	+	157944491	157944521	G7535.1	TTTAAAAAAACTGTACAGTAAATTCTCAAAG	20	2	20	160	SNX9
chr6	+	158507349	158507382	G7536.1	AAACTGCACGTATACACAGGTTCACATCACTCTG	15	2	3	117	TULP4
chr6	-	7338983	7339007	G7555.1	ATCATGCTGCCCTGGGACCCAACTG	22	2	2	99
chr6	-	7339358	7339400	G7556.1	AATGTTCTTGGTGAGAAGGGCCGGCGGATTCGGGAACTGACTG	87	3	5	453	RPS3
chr6	-	20421768	20421811	G7566.1	TTCTGGGCTGTAGTGCGCTATGCCGATCGGGTGTCCGCACTAAG	70	3	6	741
chr6	-	26031782	26031828	G7571.1	ACTTCAAGACCGATCTTCGCTTCCAGAGCTCTGCGGTGATGGCGCTG	108	7	15	1081	HIST1H3B
chr6	-	26056181	26056242	G7578.1	AAAAAAGCGTTGGCTGCCGCCGGCTATGATGTGGAGAAAAACAACAGCCGTATCAAACTTGG	29	2	4	151	HIST1H1C
chr6	-	26056268	26056319	G7578.2	GTCCCCCGGTGTCAGAGCTCATCACCAAGGCTGTGGCCGCCTCTAAAGAGCG	57	2	4	359	HIST1H1C
chr6	-	26056386	26056437	G7579.1	ATTCTCAACATGTCCGAGACTGCTCCTGCCGCTCCCGCTGCCGCGCCTCCTG	53	3	6	404	HIST1H1C
chr6	-	26196972	26197006	G7584.1	ATCTGCGTTTTCAGAGCTCGGCGGTGATGGCGCTG	19	2	5	154	HIST1H3D
chr6	-	26311232	26311249	G7589.1	TTAGCACTCTGGACTTTG	18	2	2	122
chr6	-	27146786	27146810	G7596.1	TTCGCCTTCAACATGCCGGAACCAG	34	2	4	156	HIST1H2BK
chr6	-	27902946	27902978	G7615.1	GCATTGGTGGTTCAGTGGTAGAATTCTCGCCTG	306	7	12	3354	VAC14
chr6	-	28941637	28941672	G7618.1	GGTTCCATGGTGTAATGGTTAGCACTCTGGACTCTG	50	2	3	342
chr6	-	28943638	28943659	G7619.1	TCTCTTCGGGGGCGTGGGTTCG	223	5	9	1542
chr6	-	30743978	30744016	G7625.1	CCCTTTAATCTGACTTCGGAGCCCTCGGACTACGCTCTG	22	2	2	212	IER3
chr6	-	30744116	30744159	G7626.1	CCAAAAGGCTTCTCTTTCTGCTGCTCACCATCGTCTTCTGCCAG	37	2	7	399	IER3
chr6	-	30744486	30744524	G7628.1	CTCACCATGTGTCACTCTCGCAGCTGCCACCCGACCATG	21	2	6	114	IER3
chr6	-	31270441	31270474	G7633.1	ACACACGTGACCCACCACCCCCTCTCTGACCATG	27	2	2	95	HLA-C
chr6	-	31536374	31536413	G7637.1	TGCAAGGACGACTCTTATCTATCACCCATGACTGATGGCT	62	4	26	585
chr6	-	31540329	31540384	G7639.1	TCCTGCTCAAGCCAGAGTTGCTCCGGGCCATTGTCGACTGTGGCTTTGAGCATCCG	13	3	6	116	ATP6V1G2-DDX39B
chr6	-	31649330	31649368	G7647.1	TGGAACGGGCTCCTCCTCAGACTCACCTCCCTTCTGGGG	23	2	11	183	BAG6
chr6	-	31733897	31733921	G7650.1	CTCCCATTCCTGCTGTATGGCACTG	12	2	3	91	CLIC1
chr6	-	31734201	31734231	G7651.1	CCCATTCTCCCAGAGACTGTTCATGGTACTG	13	2	2	90	CLIC1
chr6	-	31785262	31785288	G7658.1	CAGCTCCTTGGACTGGGATCGAGCCTG	10	2	10	50	VARS
chr6	-	42956564	42956596	G7681.1	AATCCTCGGCAGATAAACTGGACTGTCCTCTAC	11	2	2	63
chr6	-	42956629	42956669	G7682.1	CTACGCCAGGACCGACGGGAAGGTTTTCCAGTTTCTTAATG	10	2	2	84
chr6	-	42966078	42966103	G7683.1	TGAAGGGGCCAGAGCTCATTAACATG	23	2	4	109	PEX6
chr6	-	46015860	46015877	G7693.1	TTGGCGGCGGCGGGATCG	37	2	43	68	CLIC5
chr6	-	53498468	53498507	G7702.1	CTTGTACATTTTTAAATTCTTACTCTGGAGCAACCTACTG	48	6	36	643	GCLC
chr6	-	68665180	68665210	G7706.1	TTACTAGAGAAGTTTCTCTGAACGTGTAGAG	15	2	2	141
chr6	-	71403593	71403616	G7709.1	TGTAAACATCCTCGACTGGAAGCT	96	2	18	546	Name=hsa-mir-30a
chr6	-	73517860	73517898	G7710.1	CGGTGGGTGTCATCAAAGCAGTGGACAAGAAGGCTGCTG	17	2	3	81	EEF1A1
chr6	-	73518440	73518478	G7713.1	CTCTTCCTGGGGACAATGTGGGCTTCAATGTCAAGAATG	38	3	3	318	EEF1A1
chr6	-	73518522	73518558	G7713.2	TATGGTGGTCACCTTTGCTCCAGTCAACGTTACAACG	10	2	5	68	EEF1A1
chr6	-	73518732	73518802	G7714.1	CCAGTGGAACCACGCTGCTTGAGGCTCTGGACTGCATCCTACCACCAACTCGTCCAACTGACAAGCCCTTG	72	3	4	435	EEF1A1
chr6	-	73519355	73519401	G7716.1	TGACTATCATTGATGCCCCAGGACACAGAGACTTTATCAAAAACATG	152	5	20	1184	EEF1A1
chr6	-	73520230	73520267	G7718.1	TTAGTTCTCGAGCTTTTGGAGTACGTCGTCTTTAGGTT	235	6	9	2671	EEF1A1
chr6	-	73521080	73521114	G7723.1	AAGTGATGTCGTGTACTGGCTCCGCCTTTTTCCCG	80	4	4	924	EEF1A1
chr6	-	75655250	75655277	G7727.1	CGACATCTGTCACCCCATTGATCGCCAG	42	2	2	250
chr6	-	85614626	85614657	G7734.1	ATTTCCCTTTATGTATATATTTTAACAATCCG	10	3	10	130	SYNCRIP
chr6	-	85677285	85677368	G7735.1	TATCTGTGATGATCTTATCCCGAACCTGAACTTCTGTTGAAAAAAAAAAACTTTTACGGATCTGGCTTCTGAGATGGACCGTTA	605	17	57	6047	SNHG5
chr6	-	85677587	85677658	G7736.1	AATCAATGATGAAACCTATCCCGAAGCTGATAACCTGAAGAAAAATAAGTACGGATTCGGCTTCTGAGATTA	653	10	24	4961
chr6	-	96891038	96891059	G7744.1	CTGTATATTTTCTCATTTTTTG	36	4	37	467	NDUFAF4
chr6	-	103886944	103886963	G7747.1	GTGGCATTGCTGGGTGGCTA	19	2	37	77
chr6	-	116258603	116258623	G7752.1	AACATTAAGACCATTGCTGAG	22	2	3	76
chr6	-	117610954	117610976	G7754.1	CATTATAAATGTAAATAACTTTG	18	2	19	143
chr6	-	127985815	127985850	G7757.1	TTAAACAGTTCCATTTCACGGGCTGGCCTGACCATG	12	2	2	118	PTPRK
chr6	-	136259034	136259069	G7761.1	CCTGTATATTTTTTAAAAACACATCTTAACTCCACG	11	2	8	130	BCLAF1
chr6	-	144370887	144370930	G7765.1	AAGGGCAAAAGCTCACTTGATCTTGATTTTCAGTACGAATACAG	192	6	6	1657
chr6	-	144370949	144370980	G7766.1	CAGGTGTCTTAAGGTGAGCTCAGGGAGGACAG	20	2	7	61
chr6	-	144371061	144371110	G7768.1	TCTGGCACAGTGAAGAGACATGAGAGGTGTAGAATAAGTGGGAGGCCCCC	97	4	5	451
chr6	-	158783533	158783556	G7784.1	ATGCCCTTGGACTGAATATTTATG	34	2	3	256	EZR
chr6	-	158785412	158785457	G7787.1	AAGGAAGGAATCCTTAGCGATGAGATCTACTGCCCCCCTGAGACTG	38	2	8	270	EZR
chr6	-	158818104	158818129	G7791.1	TTTTCGGGGATCGAGGATACTCACCA	14	2	2	70	EZR
chr6	-	159780302	159780323	G7797.1	ATAAAATAACATTGGGCCACTG	15	2	2	71
chr7	+	874770	874816	G7812.1	ATAGGACTTTGTGCAATGTATTTTTGTAAATGCTTTTCAAAATATCT	10	3	11	190	SUN1
chr7	+	2376962	2377000	G7820.1	TACTGGCTGTGGACTTTCCAGGGACGCCTCCTGCAGAAG	18	2	14	134	EIF3B
chr7	+	4764910	4764956	G7829.1	CATTCTTCCTGTTAGCGGTAGCGTTCTCTGATTTCACTGCTTCATTG	16	5	10	310	FOXK1
chr7	+	5605311	5605359	G7833.1	CGGTCACCAGCAGCGGCGACACTCCTGTGGACTTCTTCTTCGAGTTCTG	15	3	4	176	FSCN1
chr7	+	5606575	5606595	G7834.1	TCATTTGTATAACTCTAAACG	19	3	17	130	FSCN1
chr7	+	12232671	12232714	G7838.1	ATCTTCAAACATTATCATTTAATGTACAATACTGTAAATAAACT	13	2	12	196	TMEM106B
chr7	+	22856613	22856646	G7840.1	TGGCCAAGGATGAGAACTCTAATCTGATTTTATG	608	9	47	6338
chr7	+	22856649	22856686	G7841.1	CTTCTGCTGTGATGGATTAAAGGATTTACCTGAGGCCA	259	5	10	2492
chr7	+	26213276	26213314	G7843.1	TTATCCAACTGTATATTGTTTACTTTATTGTAAATACTG	80	8	89	1225	CBX3
chr7	+	30632381	30632419	G7847.1	ACCCCCCACACTGCAACTCTGAGGGACCGTGACTCAATG	10	2	3	38	GARS
chr7	+	44801435	44801473	G7859.1	TTTTATCTTAACCACCAGATCATTCCTTCTGTAGCTCAG	12	3	4	133	PPIA
chr7	+	48632765	48632804	G7863.1	TTCAGACATTTGGTGTATGTGCTTGGCTGAGGAGCCAATG	161	5	5	1473	ABCA13
chr7	+	56059585	56059606	G7867.1	ACGACCTAAGTCCTGACTGCTT	21	2	4	104	CCT6A
chr7	+	56080033	56080072	G7870.1	TTGCTGTGGAAGGAGAATGCTTTCTTTGTGGCCTCATCTG	9	2	2	113	SUMF2
chr7	+	69062413	69062461	G7873.1	GCGGGTGTTGACGTGATGTGATTTCTGCCCAGTGCTCTGAATGTCAAAC	1120	15	102	12624
chr7	+	69062477	69062521	G7874.1	AAATGCGGGTAAACGGCGGGAGTAACTATGACTCTCTTAAGGTAG	4454	10	163	30062
chr7	+	69062541	69062580	G7875.1	ATTAGTGACGCGCATGAATGGATGAACGGGATTCCCACTG	204	6	12	969
chr7	+	69062616	69062699	G7876.1	GAACGGGCTTGGTGGAATCAGCGGGGAAAGAAGACCCTGTTGAGTTTGACTCTAGTCTGGCATGGTGAAGAGACACGAGAGGTG	561	10	56	2644
chr7	+	73831550	73831594	G7881.1	ACCATGATCGTGGCGGGCGTGGTGTTCCTGTTGGCCGGCCTTATG	19	2	3	178	CLDN4
chr7	+	73832629	73832669	G7885.1	CTATTCATCACTGTAATTATTATTATTTTCTACAATAAATG	40	8	42	718	CLDN4
chr7	+	74196445	74196472	G7890.1	TCTGCGGCCACATCTTGGGGACACACTG	20	3	5	109	EIF4H
chr7	+	75986802	75986841	G7896.1	TGTAAATAATTTTAAATAACCTCTGGCCCTTGGAATAAAG	39	6	34	407	POR
chr7	+	76057445	76057485	G7898.1	AAAGGTTGTGATGTGGTAGTTATTCCGGCTGGAGTCCCCAG	19	2	3	201	MDH2
chr7	+	80094526	80094543	G7903.1	GTGGAACTAGGTGTGAAT	15	2	30	45
chr7	+	98937650	98937677	G7906.1	TTTTTAGAAGGTGCTACCATAGAAGTCG	17	2	2	151	TRRAP
chr7	+	99392776	99392802	G7914.1	ACGGCCCGCGAGCGCTTCCAGAACCTG	13	2	2	29	AC004922.1
chr7	+	100678261	100678291	G7923.1	ACCTTCATCGGCCATGAATCCGACATCAATG	32	2	2	222	GNB2
chr7	+	100679137	100679167	G7928.1	TTTTTCCATAAAGGAGCCAATTCCAACTCTG	14	2	5	135	GNB2
chr7	+	101160863	101160902	G7933.1	ATGTCCTTCCCTCCCTAATAACTGTAAATATATAAATATG	77	6	76	874	AP1S1
chr7	+	105113372	105113392	G7938.1	ATAAACTGTATATTTCATATG	20	2	4	162	KMT2E
chr7	+	116258745	116258766	G7943.1	ATATGTATATTACTCAAAATAA	40	4	44	276	TES
chr7	+	116506726	116506762	G7945.1	TTTCATTTTACTGTATATTTTGTAGTTAATATAAATG	15	5	16	145	CAV2
chr7	+	125034260	125034283	G7952.1	TTCTGGGCTGTCTTGGGGGAAGTG	18	2	23	115
chr7	+	128697537	128697558	G7957.1	AATACCGGGTGCTGTAGGTTTT	25	2	2	192
chr7	+	128843482	128843520	G7958.1	TTTGCAGGGACAGCCAAGGGCGAGGTTGTGCGGGACTTT	11	2	3	96	FLNC
chr7	+	128855256	128855300	G7963.1	TGGTGCCTGTGGCCTCCCTCTCGGATGACGCTCGCCGTCTCACTG	14	3	3	156	FLNC
chr7	+	131242844	131242874	G7969.1	TACTCTGTGGATATCCCCTTGGACAAAACTG	11	2	2	97
chr7	+	132753095	132753124	G7970.1	GCAAGGACTTGTCATAGTTACACTGACTGT	572	4	17	4563
chr7	+	135648679	135648707	G7972.1	ACATCTTTTCTGTAAACTTCTTCCCCTAG	27	3	29	295	NUP205
chr7	+	139340718	139340756	G7976.1	ATAAGGCATTGGCCTCCTAAGCCAGGGATTGTGGGTTCG	50	3	4	352	FMC1
chr7	+	143389916	143389959	G7979.1	ATGAGACTGTGCGAGTGGTCGCCCTGGACAAGAACTTCCACATG	31	2	4	222	ZYX
chr7	+	145997344	145997389	G7980.1	CACCCAACTTACACTTAGGAGATTTCAACTTAACTTGACCGCTCTG	553	8	42	5034
chr7	+	148963315	148963346	G7984.1	GGCTGGTCCGATGGTAGTGGGTTATCAGAACT	62	2	3	535
chr7	+	148983817	148983856	G7986.1	TTCCTTCTCCACTCCCACTGCTTCACTTGACTAGCCTTTT	11	2	3	160
chr7	+	149310190	149310222	G7987.1	GGGGGCATAGCTCAGTGGTAGAGCATTTGACTG	90	4	19	701
chr7	+	151067938	151067979	G7991.1	CTCGCTGGATCAAATTTGAAGAGGACGTGGAGGAGGAGACTG	16	2	8	80	SLC4A2
chr7	+	151074068	151074110	G7993.1	CTCAGCCTCCAACAGCTCAGAGGTGGACGGCGGTGAGAACATG	14	2	4	66	SLC4A2
chr7	+	151144341	151144363	G7998.1	TCCCATGTAAACTTTGTACATTG	11	2	6	83	AGAP3
chr7	+	157174934	157174957	G8001.1	AACTTAATTAAACACAGCTCTCTG	17	2	3	116	UBE3C
chr7	-	1477806	1477836	G8006.1	TAAGCCCGTTGTGGTGGTGAGCTCCCTGCTG	38	2	3	273	INTS1
chr7	-	5527580	5527617	G8025.1	ACTCAGGATTTAAAAACTGGAACGGTGAAGGTGACAGC	50	2	2	120	ACTB
chr7	-	5528326	5528371	G8030.1	AAGAGCTACGAGCTGCCTGACGGCCAGGTCATCACCATTGGCAATG	26	2	2	177	ACTB
chr7	-	5528402	5528467	G8030.2	CGGGAAATCGTGCGTGACATTAAGGAGAAGCTGTGCTACGTCGCCCTGGACTTCGAGCAAGAGATG	200	6	19	1441	ACTB
chr7	-	5528616	5528665	G8030.3	CTATCCCTGTACGCCTCTGGCCGTACCACTGGCATCGTGATGGACTCCGG	124	2	5	1038	ACTB
chr7	-	5529247	5529285	G8032.1	ACGACATGGAGAAAATCTGGCACCACACCTTCTACAATG	120	3	4	513	ACTB
chr7	-	5529597	5529647	G8034.1	ATATCGCCGCGCTCGTCGTCGACAACGGCTCCGGCATGTGCAAGGCCGGCT	78	2	3	466	ACTB
chr7	-	13894725	13894750	G8039.1	TCTTTTCTGTAATATTCTCTTTCATG	12	2	13	167	ETV1
chr7	-	22090401	22090428	G8042.1	AAGGGCAGGGCGCCCTGGAATGGGTTTG	972	4	30	4830
chr7	-	22510721	22510751	G8043.1	ACTATCCACCTTTGGGTCGCTTTGCTGTTCG	19	2	6	187
chr7	-	22511058	22511099	G8045.1	AAGCTCTTCCTGGGGACAATGTGGGCTTCAATGTCAAGAATG	26	2	2	220
chr7	-	22511160	22511221	G8045.2	TACTGTTCCTGTTGGCCGAGTGGAGACTGGTGTTCTCAAACCCGGTATGGTGGTCACCTTTG	57	3	3	508
chr7	-	22511794	22511834	G8048.1	TATGCCTGGGTCTTGGATAAACTGAAAGCTGAGCGTGAACG	60	2	2	469
chr7	-	22511873	22511918	G8048.2	ATCTATAAATGCGGTGGCATCGACAAAAGAACCATTGAAAAATTTG	63	2	2	383
chr7	-	25123324	25123349	G8051.1	AATATATTTAAATACTGGGGAAATTG	19	4	19	148	CYCS
chr7	-	26191870	26191895	G8052.1	AGTTAAGAAGCTGTTGTACATTTATG	19	5	21	167	HNRNPA2B1
chr7	-	26200595	26200632	G8056.1	ATCTCTCTCATCTCGCTCGGCTGCGGGAAATCGGGCTG	16	2	3	108	HNRNPA2B1
chr7	-	29922361	29922387	G8062.1	AGGGGACCGAGCCCTGTTACATGGATG	13	2	2	63	SCRN1
chr7	-	44985429	44985458	G8069.1	TGCTTGCTAGAACAGTTTTGAAACGGTTTG	54	3	4	521	SNHG15
chr7	-	45104385	45104429	G8073.1	AAGGCTGCCACAGAAACACTGTGACTCATGGGCCCTGTTCCTGTG	53	3	3	307
chr7	-	76329768	76329805	G8085.1	ATTAGGCCTGGCTCTTAACTACTCCGTCTTCTACTATG	28	3	5	387	YWHAG
chr7	-	97141592	97141618	G8089.1	ACTCTTAATCTCAGGGTCGTGGGTTCG	121	3	7	1082
chr7	-	100093571	100093592	G8104.1	CATTGCACTTGTCTCGGTCTGA	48	2	2	382	Name=hsa-miR-25-3p
chr7	-	100093815	100093837	G8105.1	CAAAGTGCTGTTCGTGCAGGTAG	19	2	2	112	Name=hsa-miR-93-5p
chr7	-	100096013	100096045	G8107.1	TGCTGCATTGATGAGTTCGACAAGATGGCTGAG	11	2	3	96	MCM7
chr7	-	105582532	105582577	G8122.1	ATGGAGGGTGCTGACAACCAGGGTGCAGGAGAACAAGGTAGACCAG	21	2	6	59
chr7	-	123684435	123684453	G8125.1	ATTCTGTAAAATTATCATG	12	3	11	85	WASL
chr7	-	128392533	128392580	G8127.1	CCATGTGGCACTTCTGAGCTCCTGACCTAGGCCAAGGGGAGGTCTCTG	16	2	4	152	IMPDH1
chr7	-	129774739	129774761	G8132.1	TTTGGCACTAGCACATTTTTGCT	10	2	3	96
chr7	-	129830737	129830776	G8134.1	AAAACTGTAAACTTTTTTAAATAAACGTGTATATACCTTG	29	4	29	260	UBE2H
chr7	-	129831046	129831079	G8135.1	TTTTCCACTCATCTGAGGAAGAGCCAGGGCTCTG	12	2	2	106	UBE2H
chr7	-	133034891	133034954	G8141.1	TACTCAGAGTATCGCTTCCCTGAAGAACTCACTCAGACCTTCATGAGCTGCAATCTCATCACTG	33	2	4	306	Name=hsa-mir-3654
chr7	-	133035477	133035523	G8142.1	AGGAAGTGAGGCGAATTCTGGGGCTGCTGGATGCTTACTTGAAGACG	99	2	3	839
chr7	-	139023203	139023226	G8150.1	ATTCTCTGTAAATGATATTCCCTG	15	3	16	134
chr7	-	140386776	140386810	G8153.1	ACTGCCTGGGAATACCGGGTGCTGTAGGCTTTAAA	533	9	27	4316	SLC37A3
chr7	-	148987153	148987190	G8161.1	AACTCCTTGTTCTACTCTTTCCCCCCTTCTCACTACTG	51	4	10	649
chr7	-	148987216	148987248	G8162.1	GGCTGGTCCGAAGGTAGTGAGTTATCTCAATTG	113	5	18	1047
chr7	-	149011876	149011908	G8165.1	TCATCATCATCGGGGTCTTTAAGGGGGAGAGTG	10	2	2	87	PDIA4
chr8	+	14310645	14310665	G8180.1	TACAAAACTGTAAATAAAATG	28	2	28	105
chr8	+	21598464	21598486	G8183.1	ATCGTTTTTTCACTGACCCGGTG	172	3	13	1523
chr8	+	22081772	22081806	G8186.1	AGGGGCATTGGTGGTTAGGCCGGTTGGCTGTCTTG	10	2	2	108	DMTN
chr8	+	26136969	26137000	G8200.1	ACTGCCTGGGAATACTGGGTGCTGTAGGCTTA	144	3	21	1132
chr8	+	33513542	33513588	G8211.1	AACCTTGTTACGACGTGGGCACATTACCCGTCTGACCTGAACTTCAA	20	3	5	149
chr8	+	41068637	41068655	G8217.1	TGGTATGTAAAGCTCTATC	20	2	9	119
chr8	+	43124121	43124164	G8220.1	TTTTTATTTATTTTTATTTTTTATTTTGAGACAGAGTGTTGCTG	10	3	5	250
chr8	+	43126655	43126685	G8221.1	CACTGTAATATATATTATCCCATTCTCTCCT	25	4	26	299
chr8	+	61578925	61578964	G8225.1	CAGTCCCAGATCTCGGACACATCTGTGGTGCTGTCCATGG	33	2	4	296
chr8	+	75376863	75376891	G8231.1	CCTGGGCTGAGGACGTGGACCTCCGGGTG	11	2	2	52
chr8	+	76865816	76865842	G8232.1	TACTTCCATTCATACTCTGGGCACTTG	17	2	2	168	ZFHX4
chr8	+	78717665	78717692	G8234.1	TACATATACTGTATATAATAAATATCTG	11	4	12	109	ZC2HC1A
chr8	+	90511215	90511242	G8237.1	CCTGGGAATACCGGGTGCTATAGGCTTG	96	3	5	638	LINC00534
chr8	+	93922032	93922080	G8238.1	TTCCAGCCTGCCACTGTTCTCTGATGCCATGCCAGCACCAACTCAACTG	24	3	6	194	PDP1
chr8	+	94706317	94706338	G8242.1	CTCTTTTCTCTTCATTTCCCTG	11	3	3	129	ESRP1
chr8	+	97565592	97565617	G8244.1	TGGGGAACCTGACGCTAAACCATTCG	94	2	2	465
chr8	+	97725822	97725853	G8247.1	ATTCTATTGTAATAAACTGGCAGGTATCTTTG	13	2	9	108	MTDH
chr8	+	98951921	98951966	G8253.1	TTTCTTGTAGATATTCACAGCTCATTTTAGAGCTCTGTACATAATG	12	3	8	203	OSR2
chr8	+	108486829	108486872	G8258.1	TCTCTTCATATCACATATACATGTATATATATAAAACTCTAATG	36	4	33	579	EMC2
chr8	+	124487780	124487825	G8265.1	TTTACTGTGATGTGCTACTGTAAATATACCTCTTTAATTACTTCTG	36	7	37	514	RNF139
chr8	+	127741215	127741261	G8275.1	TTTCTCTGTAAATATTGCCATTAAATGTAAATAACTTTAATAAAACG	36	6	33	360	MYC
chr8	+	128099797	128099826	G8276.1	TTCTTTTAAAACTGTATCATAAACATCTTG	24	2	27	285	PVT1
chr8	+	132013148	132013183	G8277.1	CTATATTTTTGTAGATAAATAAAACTCAATAAATTG	13	2	7	136	EFR3A
chr8	+	143297947	143297981	G8281.1	TTATTTCCTGTAAAATATTTTCATTTTTTAAAATG	19	5	16	330	ZNF696
chr8	+	144359353	144359392	G8294.1	CATGGGCTCCTGGGCTGCGGTCAATGGGATCTGGGTGGAG	16	2	4	83	SLC52A2
chr8	+	144359650	144359687	G8295.1	TGCTTGTGGCTCTGGGGAACCTGGGTCTGCTGGTGGTG	25	3	6	204	SLC52A2
chr8	-	23021935	23021978	G8313.1	CCTTACCTTTCTACTTTTATAATTCTGTATGTTATTATTTTATG	11	4	8	201	TNFRSF10B
chr8	-	23189892	23189915	G8316.1	ATCATAAAACTGTAAATTCAACTG	10	2	7	54
chr8	-	27605024	27605065	G8320.1	ATGCCCTTCTCTCCGTACGAGCCCCTGAACTTCCACGCCATG	11	2	5	105	CLU
chr8	-	29338421	29338458	G8323.1	CCTACCATGCTGCCCGGAGAGACATGCTGGACGCCCTG	14	2	3	53	DUSP4
chr8	-	38269856	38269896	G8336.1	TGCTGGTAGGAACATATAATTTTTGTACATTATATTTACTG	14	3	14	235	NSD3
chr8	-	42417586	42417614	G8339.1	CTAACTTAACTACTGTACATAATAATATG	28	6	30	250	SLC20A2
chr8	-	55842481	55842513	G8354.1	AAATGATCTCAACCTATTCTCAAACTTTAAATG	31	2	2	310
chr8	-	55842643	55842663	G8355.1	TCGTCCGACCTGGGTATAGGG	803	4	11	3996
chr8	-	55902723	55902758	G8356.1	CATATTGCAGTGGTGACAATGAGACCTGTAACATTT	29	2	2	283
chr8	-	55909428	55909454	G8357.1	CTGCCATCTGTGGGATTATGACTGAAC	206	4	6	1560
chr8	-	56073837	56073871	G8358.1	TAACGGTGATAATTTTATACGCTATTCTGAGCCAG	78	4	7	879
chr8	-	61684066	61684111	G8367.1	ATTGCATTGCTGGGCGTCTGGACATCTGTAGCTGTCGTTTGGTTTG	23	2	15	287	ASPH
chr8	-	69690087	69690203	G8371.1	TCCCTACCTACTATCCAGCGAAACCACAGCCAAGGGAACGGGCTTGGCGGAATCAGCGGGGAAAGAAGACCCTGTTGAGCTTGACTCTAGTCTGGCATGGTGAAGAGACATGAGAGG	164638	12	1097	616880	SLCO5A1
chr8	-	69690204	69690277	G8371.2	ACTCTCTTAAGGTAGCCAAATGCCTCGTCATCTAATTAGTGACGCGCATGAATGGATGAACGAGATTCCCACTG	8605	13	119	55615	SLCO5A1
chr8	-	69690321	69690373	G8372.1	CGGCGGGTGTTGACGCGATGTGATTTCTGCCCAGTGCTCTGAATGTCAAATTG	375644	16	9005	3829145	SLCO5A1
chr8	-	70597894	70597920	G8373.1	TTTGGGGCACATTCATTCTCATCTCTG	11	2	2	119	TRAM1
chr8	-	98042142	98042188	G8380.1	TAATAGTCAGGACAGGCTAAACATTCGCTATATTAAGACCATGCATG	44	4	7	511
chr8	-	100712709	100712754	G8386.1	AAAACAAATTTATGTTGGTCGAGCTCAGAAAAAGGTGGAACGGCAG	20	2	2	84	PABPC1
chr8	-	100715528	100715560	G8388.1	AACTTGGAGCTAGGGCAAAAGAATTCACCAATG	63	2	2	295	PABPC1
chr8	-	102828091	102828112	G8403.1	TGTAAATTTGTGCTTTGAACTG	16	3	18	142	AZIN1
chr8	-	134804917	134804940	G8420.1	TGTAAACATCCCCGACTGGAAGCT	57	2	7	261	Name=hsa-miR-30d-5p
chr8	-	135773772	135773800	G8421.1	TGGGGGGCCCAAGTCCTTCTGATCGAGGT	95767	7	987	518496
chr8	-	143806965	143807010	G8444.1	ACCCTCACTATCCTGCGGCAGACTGGGGGCCTGGGCATCAGCATTG	23	3	12	125	SCRIB
chr8	-	143917345	143917390	G8466.1	TGGACCCCGAGACGGGCAAGGAGATGTCAGTGTACGAGGCCTACCG	14	2	4	62	PLEC
chr8	-	143931948	143931982	G8499.1	CTGCTGTATCGAGGCACACCTGAAGGAGAACGCTG	55	2	7	227	PLEC
chr8	-	143933252	143933282	G8503.1	GCGGATAGCATGATCCGGCTGCTCTTCAACG	12	2	3	44	PLEC
chr8	-	144790386	144790429	G8526.1	AAGGCTGGCCGGGCGTACCACAAATATAAGGCAAAGAGGAACTG	110	2	4	433	RPL8
chr8	-	144791376	144791431	G8527.1	CCTGGAGGAGAAGCCTGGAGACCGTGGCAAGCTGGCCCGGGCATCAGGGAACTATG	66	2	2	155	RPL8
chr8	-	144791799	144791848	G8528.1	TTTAAGAAGCGGACGGAGCTGTTCATTGCCGCCGAGGGCATTCACACGGG	72	3	3	390	RPL8
chr8	-	144792072	144792117	G8530.1	ATCCGTGGACAGAGGAAGGGCGCCGGGTCTGTGTTCCGCGCGCACG	29	2	5	160	RPL8
chr9	+	4888931	4888960	G8532.1	TTTCCCTTCAACCTATTTTCTGCACTTCTG	14	2	2	194
chr9	+	9442114	9442172	G8533.1	GAGGATCGCTTGAGTCCAGGAGTTCTGGGCTGTAGTGCGCTATGCCGATCGGGTGTCCG	85	6	8	682
chr9	+	33034250	33034296	G8536.1	TGAAGGAGACCAAGAACCAGGACTGGAGCCAGGCGATATTATCATTG	31	3	4	175	DNAJA1
chr9	+	33038779	33038812	G8537.1	AGATGGACCAAGTAGAACTGGTGGACTTTGATCC	52	2	3	393	DNAJA1
chr9	+	33658757	33658792	G8542.1	AAGACCCTATGGAGCTTTAATTTATTAATGCAAACA	41	2	2	449
chr9	+	34050066	34050091	G8543.1	CTCCATGTGCGTCCCTCCCGAAGCTG	23	2	4	134
chr9	+	35398999	35399026	G8544.1	CGTACTCCGGCCTCTCATGGACTTCCTG	14	2	3	109	UNC13B
chr9	+	36204110	36204136	G8547.1	CAATAAAGGAGCTAGAAGAATGGTATG	9	2	4	41	CLTA
chr9	+	37485985	37486026	G8549.1	TTTAAAAGTGCGCTTGTGGCTGCTGCTGTCTTAACTCCTGTG	13	3	4	172	POLR1E
chr9	+	64048204	64048238	G8552.1	ACGTTAGGTCAAGGTGTAGCCCATGAGGTGGCAAG	68	3	5	461
chr9	+	76571751	76571804	G8557.1	AGCCTCGGTTGGCCTCGGATAGCCGGTCCCCCGCCTGTCCCCGCCGGCGGGCCG	655	4	12	3491
chr9	+	76571905	76571965	G8559.1	CGCACGTTCGTGGGGAACCTGGCGCTAAACCATTCGTAGACGACCTGCTTCTGGGTCGGGG	11075	12	454	68604
chr9	+	76571999	76572020	G8560.1	ATCTATTGAAAGTCAGCCCTCG	301	3	5	1736	USP53
chr9	+	93679440	93679462	G8570.1	CAACATGTACATTTCTAACAAAG	12	2	10	62	PHF2
chr9	+	94176353	94176373	G8572.1	TGAGGTAGTAGATTGTATAGT	58	5	11	450	Name=hsa-let-7f-1
chr9	+	113584173	113584209	G8585.1	ACGGGCCAGGGGGCTGAGGGTGGCCTCTCACTGCGTG	15	2	2	88	RGS3
chr9	+	128345321	128345347	G8595.1	TACTCAAGCAGTGTAGCCAACTTCCTG	11	2	2	75	SLC27A4
chr9	+	132694178	132694219	G8611.1	TGACTTCTCTCCATTGTATATATGTACATAGTTTTCATTACT	21	8	25	360	GTF3C4
chr9	+	133019535	133019612	G8612.1	ATTCGGGCAAGTCCACCACTACTGGCCATCTGATCTATAAATGCGGTGGCATCGACAAAAGAACCATTGAAAAATTTG	82	10	19	624
chr9	+	133020243	133020308	G8614.1	TCTACAAAATTGGTGGTATTGGTACTGTTCCTGTTGGCCGAGTGGAGACTGGTGTTCTCAAACCCG	24	4	7	242
chr9	+	133020351	133020374	G8614.2	TAAAATCTGTCGAAATGCACCATG	10	2	2	55
chr9	+	133020518	133020551	G8615.1	ATTATCCTGAACCATCCAGGCCAAATAAGCGCCG	19	2	2	92
chr9	+	133020735	133020765	G8617.1	ACTATCCACCTTTGGGTCGCTTTGCTGTTCG	18	2	6	179
chr9	+	133350118	133350161	G8621.1	GCCTGAAATTACTGTGAAGAGTAAAACCGAGCTTTTTAACACTG	52	2	3	351
chr9	+	133350493	133350528	G8622.1	AAGTGCGAATCCATGAGCTTTTTAACCCTGAGCAAT	48	3	3	414
chr9	+	133350647	133350681	G8623.1	CATTATCAAGGGAAAGGCAAGACTGGGACGTCTAG	43	3	3	248	RPL7A
chr9	+	133350859	133350895	G8624.1	TTAAGAATTTCTTCACCTGAATAAACCATGTGGTCAG	76	2	3	895
[truncated: 267 more rows]

## Sheet: WT-2_PAR-CLIP
Chromosome	Strand	ClusterStart	ClusterEnd	ClusterID	ClusterSequence	ReadCount	ConversionLocationCount	ConversionEventCount	NonConversionEventCount
chr1	+	629303	629345	G2.1	CATACCCCCGATTCCGCTACGACCAACTCATACACCTCCTATG	68	3	4	528
chr1	+	629653	629682	G3.1	CCCAACCCGTCATCTACTCTACCATCTTTG	41	4	6	356
chr1	+	629836	629883	G4.1	CATCCATAATCCTTCTAATAGCTATCCTCTTCAACAATATACTCTCCG	168	6	12	1587
chr1	+	630283	630310	G5.1	CATTCCTACTACTCAACTTAAACTCCAG	38	4	4	300
chr1	+	631071	631113	G8.1	CTGATGTTCGCCGACCGTTGACTATTCTCTACAAACCACAAAG	162	7	13	1289
chr1	+	631264	631308	G9.1	TAATAATCTTCTTCATAGTAATACCCATCATAATCGGAGGCTTTG	134	4	4	1119
chr1	+	632033	632059	G14.1	TATTTAGCTGACTCGCCACACTCCACG	93	3	3	409
chr1	+	632237	632261	G16.1	CCATCATAGGAGGCTTCATTCACTG	34	3	3	235
chr1	+	632441	632464	G18.1	TAGGCTCATTCATTTCTCTAACAG	65	3	5	555
chr1	+	633101	633141	G20.1	ACTAATCTTCAACTCCTACATACTTCCCCCATTATTCCTAG	9	3	3	109
chr1	+	633953	634002	G25.1	ACTCCTGCCTCACTCATTTACACCAACCACCCAACTATCTATAAACCTAG	106	3	4	531
chr1	+	634172	634218	G27.1	CCTAACCGCTAACATTACTGCAGGCCACCTACTCATGCACCTAATTG	48	2	2	334
chr1	+	634513	634545	G29.1	CCTACTAACCAACACACTAACCATATACCAATG	51	3	5	301
chr1	+	634761	634781	G31.1	TCCCACTCCTAAACACATCCG	96	2	2	378
chr1	+	1167160	1167182	G37.1	TAATACTGCCTGGTAATGATGAC	106	3	4	737	hsa-mir-200b
chr1	+	1169055	1169076	G40.1	TAATACTGTCTGGTAAAACCGT	60	2	10	408	hsa-mir-429
chr1	+	2309446	2309477	G46.1	TTCACCTGTAAATACTTTTTCCTTTTTCACCG	36	8	37	503	SKI
chr1	+	10323908	10323953	G53.1	ACTGACACACTGTACTCCCCTTTGCCTCCTGAATTACTTCCCACTG	13	2	3	179	KIF1B
chr1	+	11908225	11908254	G57.1	TGAGTCTGAAACCAATTTTTTGAGGCCTTG	39	3	3	403
chr1	+	16872606	16872638	G80.1	ATTCGGCGCTTTCACCGCCGCGGCCCGGGTTCG	18	2	3	104	BX284668.2
chr1	+	22909076	22909117	G84.1	TTCACCTCGGCCAGTGATGTGTGGAGCTACGGCATTGTCATG	10	4	4	116	EPHB2
chr1	+	23694677	23694710	G89.1	AAGAAAAAACAACTTCTCAGATACTGGAAACTTT	9	3	9	60	RPL11
chr1	+	28508558	28508579	G118.1	TCCAACGTGGATACCCTGGGAG	48	2	2	186
chr1	+	28648606	28648641	G124.1	GGCTTCTGTCGTGAGTGGCACACGTAGGGCAACTCG	82	5	7	532	AL360012.1
chr1	+	28648642	28648670	G125.1	ATTGCTCTGCGTGCGGAATCGACATCAAG	67	2	2	433	AL360012.1
chr1	+	28648673	28648719	G126.1	ATTTCGGAAGCATAATTTTTTGGTATTTGGGCAGCTGGTGATCGTTG	384	13	26	5577	AL360012.1
chr1	+	38710127	38710159	G156.1	CTGTCCAGGCTGGTGTGCTCTCTGGTGATCAAG	29	3	13	260
chr1	+	38710647	38710693	G158.1	AATCAGATTGGAGATAAAGAAAAGCTGGGAGGTAAACTTTCCTCTGA	16	3	4	134
chr1	+	39468680	39468711	G163.1	TGGAGGATGGATGGCCTTGGATGAATTTTTAG	11	2	3	118	MACF1
chr1	+	40757300	40757323	G170.1	TGTAAACATCCTACACTCTCAGCT	17	3	4	113	hsa-mir-30c-1
chr1	+	43606314	43606356	G185.1	TGTGGCTGCTCAACTGGATGTGCTCCCGGAGACCTTTACCTTG	13	2	2	165	PTPRF
chr1	+	44775866	44775905	G199.1	TGTATGATGACAACTCGGTAATGCTGCATACTCCCGAGTG	129	2	4	908
chr1	+	44776493	44776526	G201.1	TAGGGTGATGAAAAAGAATCCTTAGGCGTGGTTG	47	4	4	356
chr1	+	44776546	44776591	G202.1	TGTGCCACTTGCCAATGCAAGGACTTGTCATAGTTACACTGACTGT	1600	13	85	15595
chr1	+	44777842	44777882	G206.1	TTCTCGTGATGAAAACTCTGTCCAGTTCTGCTACTGAAGGG	684	13	48	7952
chr1	+	44778390	44778429	G207.1	TCTCAGTGATGAAAACTTTGTCCAGTTCTGCTACTGACAG	554	10	34	6211
chr1	+	44778430	44778456	G208.1	TAAGTGAAGATAAAGTGTGTCTGAGGA	699	6	22	4869
chr1	+	51271857	51271899	G213.1	TCTTTTTAAATAGTGTATTATTATCGTTGGGGCTGGCTCTATG	17	3	17	242	RNF11
chr1	+	75787072	75787149	G230.1	GGTCAATGATGAGTTGGCATGTATTCTGAATCTAAAGTTGATTATTACTACTTTAGCTCTAGAATTACTCTGAGACCT	438	11	16	5317
chr1	+	75787888	75787971	G231.1	AGGTCAATGATGTGTTGGCATGTATTATCTGAATCTATTGCTGATGTGTAATAACACTTTAGCTCTAGAATTACTCTGAGACCT	786	23	75	10499
chr1	+	76700629	76700668	G237.1	ATGGTGTCATCTGCTCCTTCCTGTGGCCTCATCCAAACTG	27	2	2	260
chr1	+	78005193	78005215	G238.1	CCCTCAAATTTCATCCGGACAAG	11	3	4	51	DNAJB4
chr1	+	92837331	92837378	G245.1	TCCTTTGGTTGCATATGATGCGATAATTGTTTCAAGACGGGACTGATG	144	2	4	1017
chr1	+	92840720	92840746	G246.1	TGCAAACTCGATCACTAGCTCTGCGTG	243	2	6	1693
chr1	+	96447621	96447667	G252.1	CTCTGGACTGCATCCTACCACCAACTCGTCCAACTGACAAGCCCTTG	30	4	6	204
chr1	+	109100576	109100612	G257.1	TCCCCGGCCACTGATTATCGAGGCGATTCTGATCTGG	491	7	36	4592	AL356488.2
chr1	+	110054542	110054567	G267.1	CCTGTAAATATCTATATATAATTCTG	26	3	25	260	STRIP1
chr1	+	114536622	114536655	G274.1	AACCTTCCTGGGGCTGCTGTGGACTTGCCTGCTG	26	3	3	223
chr1	+	116373437	116373474	G276.1	CCGGGAGCTGCTCTGTGCTTTTCTCTCTGATTCTCCAG	26	2	2	311	ATP1A1
chr1	+	116387378	116387401	G277.1	TTTTGTCGGCAGCTCTTTGGGGGG	40	2	6	339	ATP1A1
chr1	+	117523095	117523120	G300.1	TTCAACTTGTAGATACATCAACTTTG	36	3	38	322	MAN1A2
chr1	+	146035710	146035731	G306.1	TTAGGATTCGGCGCTCTCACCG	39	4	9	151	AL592295.3
chr1	+	146038044	146038079	G308.1	GCCGTGATCGTATAGTGGTTAGTACTCTGCGTTGTG	482	12	143	5672	LINC01138
chr1	+	146039425	146039476	G309.1	CATGAGACTCTTAATCTCAGGGTCGTGGGTTCGAGCCCCACGTTGGGCGCTG	33	3	6	301
chr1	+	147073225	147073260	G310.1	GCCGTGATCGTATAGTGGTTAGTACTCTGCGTTGTG	484	12	153	5675	LINC01138
chr1	+	148281362	148281400	G312.1	CTCGCCGTGATCGTATAGTGGTTAGTACTCTGCGTTGTG	437	10	141	5139
chr1	+	149832805	149832841	G314.1	CGTGGCGGCGTTAAGCGGATCTCTGGCCTCATTTACG	29	3	7	210	HIST2H4A
chr1	+	154259834	154259862	G332.1	ACTGGATAAATTGCACAACTCTCACATTC	66	2	2	496
chr1	+	157073752	157073797	G358.1	AACATGCAGGGGCTGGTGGAGGACTTCAAGAACAAGTATGAGGATG	14	2	2	62
chr1	+	157074774	157074793	G360.1	CAGGGTAGCACTGGGAACAG	11	2	2	20
chr1	+	158525548	158525584	G362.1	AAACACCTGGAGATAAACCCTGACCATTCCATTATTG	11	2	2	84	HSP90AA1
chr1	+	161443304	161443336	G368.1	GCATGGGTGGTTCAGTGGTAGAATTCTCGCCTG	169	5	11	1669
chr1	+	161450677	161450709	G369.1	GCATGGGTGGTTCAGTGGTAGAATTCTCGCCTG	200	5	9	1980
chr1	+	161458108	161458140	G370.1	GCATGGGTGGTTCAGTGGTAGAATTCTCGCCTG	201	6	18	1979
chr1	+	161465468	161465500	G371.1	GCATGGGTGGTTCAGTGGTAGAATTCTCGCCTG	193	7	14	1898
chr1	+	166853761	166853781	G376.1	CTCACCTGTATATTTAAACTG	11	2	11	77	POGK
chr1	+	167006052	167006079	G377.1	CCTGGGAATACTGGGTGCTGTAGGCTTT	793	7	29	6827	MAEL
chr1	+	169131983	169132010	G380.1	GTGTAAATATTCAACGGGAATAAAACTG	12	3	13	71	ATP1B1
chr1	+	172748772	172748797	G386.1	ATCATGGGTCTAGACGTGTTGGGATG	11	2	6	58
chr1	+	173488281	173488306	G390.1	TTCAACTTCCTCTGTAAATATCCAAG	31	4	31	241	PRDX6
chr1	+	182876206	182876238	G402.1	CCTGGCTGGAATCTGATTTATACTATGCAGAAG	14	2	4	133	DHX9
chr1	+	193086211	193086240	G411.1	TCTGAGGATTTCTGTACATATTTTCTTCTG	53	4	43	668	TROVE2
chr1	+	193091511	193091540	G412.1	TTTTCACTGTAAATAATACAACTAACAATG	33	4	34	285	TROVE2
chr1	+	194189116	194189146	G413.1	AAAGGGCTCCTTCAAGTATGCCTGGGTCTTG	24	3	3	201
chr1	+	194189716	194189755	G414.1	TCTACAAAATTGGTGGTATTGGTACTGTTCCTGTTGGCCG	23	3	4	219
chr1	+	203309101	203309137	G421.1	CTATTTACCAAACACTCTCCCTACCCATTCCTGCCAG	15	2	29	121	BTG2
chr1	+	223747109	223747132	G434.1	TTCAAGATCATCCAGAAAGCTCTG	31	2	11	135	CAPN2
chr1	+	227561271	227561302	G444.1	ACCGCCTGGGAATAACGGGTGCTGTAGGCTTT	125	4	5	934
chr1	+	228099031	228099070	G453.1	CTGGAGCTGTTAAATTTATCTTGGGGAAACCTCAGAACTG	18	2	4	201	ARF1
chr1	+	237603033	237603071	G475.1	ACATGATGTGATTTCTGCCCAGTGCTCTGAATGTCAAAG	126	6	22	1316	RYR2
chr1	+	237603092	237603138	G476.1	CGGGTAAACGGCGGGAGTAACTATGACTCTCTTAAGGTAGCCAAATG	5440	8	116	35907	RYR2
chr1	+	237603227	237603297	G477.1	AACGGGCTTGGTGGAATCCGCGGGGAAAGAAGACCCTGTTGAGCTTGACTCTAGTCTGGCACGGTGAAGAG	2536	10	134	18643	RYR2
chr1	+	237927034	237927079	G478.1	TACCCCATTGAGCATGGCATCGTCACCAACTGGGACGACATGGAGA	37	3	11	213
chr1	+	248874248	248874287	G484.1	TCCCTGGTGGTCTAGTGGTTAGGATTCGGCGCTCTCACCG	52	4	10	337
chr1	-	630929	630959	G488.1	AAGAAGCAGCTTCAAACCTGCCGGGGCTTCT	42	2	32	194	AL669831.3
chr1	-	946408	946433	G491.1	TTTCCTTCGGCGTCTCTGAGCAGCAG	17	2	3	128	NOC2L
chr1	-	1790457	1790486	G516.1	CTTGTGATGCTTCAGCCAAACTCTGGGATG	13	2	3	101	GNB1
chr1	-	6593185	6593234	G527.1	CCCAGGATCCATTACCTGGAAGGTTTCTGTACCTTGAGAGCCTGAATCAG	19	2	3	148	KLHL21
chr1	-	8861304	8861358	G535.1	CTGTGGGCAGGCAAGCCCTTCGGTCACCTGTTGGCTACACAGACCCCTCCCCTCG	37	2	3	240	ENO1
chr1	-	8861363	8861408	G535.2	CAAGGCTAAGTTTGCCGGCAGGAACTTCAGAAACCCCTTGGCCAAG	65	3	5	357	ENO1
chr1	-	8863240	8863285	G537.1	ACTGAAGATACCTTCATCGCTGACCTGGTTGTGGGGCTGTGCACTG	75	2	5	532	ENO1
chr1	-	8865402	8865465	G540.1	ACTGCTATTGGGAAAGCTGGCTACACTGATAAGGTGGTCATCGGCATGGACGTAGCGGCCTCCG	183	4	8	1027	ENO1
chr1	-	8867137	8867178	G544.1	TCCCCCTGTACCGCCACATCGCTGACTTGGCTGGCAACTCTG	68	3	3	597	ENO1
chr1	-	8871915	8871959	G546.1	GTGCTTCAACTGGTATCTATGAGGCCCTAGAGCTCCGGGACAATG	156	3	14	999	ENO1
chr1	-	8874842	8874886	G547.1	CCAGGGAGATCTTTGACTCTCGCGGGAATCCCACTGTTGAGGTTG	27	2	2	184	ENO1
chr1	-	9743977	9744000	G553.1	AATCGGCACCACTACTCCCTCTAT	23	2	2	136	CLSTN1
chr1	-	11259362	11259409	G556.1	ATGCTTGGAACCGGACCTGCCGCCGCCACCACCGCTGCCACCACATCT	14	2	3	89	MTOR
chr1	-	16198109	16198131	G572.1	TCTGTAAATAAACTCCTATCATG	19	2	21	131	ARHGEF19
chr1	-	16255710	16255753	G576.1	ATAAAATGATTGTCTTTGGTGGCTCTTTAGGATCCCGGCAAATG	12	2	2	178	FBXO42
chr1	-	16545972	16545991	G578.1	TAGAATTCTCGCCTCCCACG	48	2	2	238
chr1	-	17429137	17429163	G585.1	ATTTTTGGGGCAACCAACTGGGACTTG	14	2	2	110	RCC2
chr1	-	19099632	19099668	G592.1	AACAATAAAATCATTAGTTTGGACCTTCCTGTGGCTG	11	2	2	116	UBR4
chr1	-	19129015	19129063	G598.1	TCCGTCTAATGCTGTTGGAGAGATTACTGCAGACCCTGCCTCAATTACG	12	2	2	158	UBR4
chr1	-	19161603	19161639	G601.1	TATGGATCCTTCTTCTGTGACTGTGGAGCCAAGGAAG	22	2	2	176	UBR4
chr1	-	20655696	20655719	G614.1	CTGTCATTGACCATCACAACTATG	12	2	3	78	DDOST
chr1	-	27916105	27916143	G636.1	ACGCGATGCGATTTCTGCCCAGTGCTCTGAATGTCAAAG	61	3	3	504
chr1	-	28032082	28032104	G637.1	TCCTGGGCTGTAGTGCGCTATGC	73	2	4	505
chr1	-	28578752	28578796	G638.1	AGTGGACATCCATGGATGAGAAATGCGGATATGGGACTGAGACCA	393	5	9	2219
chr1	-	28579765	28579787	G639.1	CATGTGGGCTAGTTTCAGACAGG	197	4	15	1167
chr1	-	28580487	28580512	G643.1	CAGCATGTTTCCAAGGGCTGTGGCTG	225	3	5	1569
chr1	-	29148294	29148318	G645.1	CTGTACATTTTTAACTCCCCTAATG	25	4	26	224	SRSF4
chr1	-	30931723	30931763	G649.1	TCTACTTGTAAGTGAATGTAACATACTGTCAATTTTCCTTG	18	3	19	217	PUM1
chr1	-	30932286	30932305	G650.1	TCTAATCTGTATCTATAATG	11	3	11	88	PUM1
chr1	-	30949163	30949200	G652.1	TGGCAATGATGACCCACTTGCCCTCACTGAGAACAAAG	41	2	3	276	PUM1
chr1	-	30968165	30968187	G654.1	ATGAGAGCATTGTTCTGAGCCAG	412	4	7	2444	PUM1
chr1	-	30968195	30968234	G654.2	TGGCAAGGATGATACACACTTGCCCTCACTTAGACTATAG	67	3	3	585	PUM1
chr1	-	36140068	36140093	G680.1	ATGTGAATAAACAGCTGGACAAAATG	11	2	8	47	TRAPPC3
chr1	-	42926196	42926225	G692.1	CCAACTTGTAAATACACCACCTCACTCCTG	16	4	15	95	SLC2A1
chr1	-	42926853	42926891	G693.1	AATATTCAGGACTTAACGGCTCCAGGATTTTAACAAAAG	15	2	7	98	SLC2A1
chr1	-	42929680	42929716	G697.1	TCGGCAGATGATGCGGGAGAAGAAGGTCACCATCCTG	11	3	5	38	SLC2A1
chr1	-	42930803	42930828	G700.1	TGTCCGCCGTGCTCATGGGCTTCTCG	9	2	2	66	SLC2A1
chr1	-	45514889	45514913	G712.1	GATTATGGGGTCTTAAAGGCTGATG	53	2	2	414	PRDX1
chr1	-	45514939	45514968	G712.2	ACTGGGACCCATGAACATTCCTTTGGTATC	122	3	5	987	PRDX1
chr1	-	51301653	51301682	G718.1	TTCCACCACATGTGCTACTGGGAGCTGATG	17	2	2	122	TTC39A
chr1	-	53765552	53765576	G722.1	GTGTGTCATCCTGTAAATATTCATG	32	2	32	256	NDC1
chr1	-	71067681	71067702	G741.1	CAAAGAATTCTCCTTTTGGGCT	11	2	2	84	hsa-miR-186-5p
chr1	-	91387226	91387499	G749.1	AAACCTCCCGTGGAGCAGAAGGGCAAAAGCTCGCTTGATCTTGATTTTCAGTACGAATACAGACCGTGAAAGCGGGGCCTCACGATCCTTCTGACCTTTTGGGTTTTAAGCAGGAGGTGTCAGAAAAGTTACCACAGGGATAACTGGCTTGTGGCGGCCAAGCGTTCATAGCGACGTCGCTTTTTGATCCTTCGATGTCGGCTCTTCCTATCATTGTGAAGCAGAATTCACCAAGCGTTGGATTGTTCACCCACTAATAGGGAACGTGAGCTGG	774316	70	12296	7462140
chr1	-	91387538	91387584	G749.2	ACAGTGCCAGGTGGGGAGTTTGACTGGGGCTGTACACCTGTCAAACG	2439	9	156	12016	HFM1
chr1	-	112956145	112956165	G765.1	CTGCGTGGGTACTGGAACAAG	15	3	5	55	SLC16A1
chr1	-	116514545	116514577	G773.1	ATGTAGATACTTTTGTAAATAAATGTAAATATG	33	5	10	368	CD58
chr1	-	143699468	143699513	G782.1	TGGGAAACTCGACTGCGTAATTTGTGGTAGTGGGGGACTGCGTTCG	40	2	3	384
chr1	-	148038765	148038810	G789.1	TGGGAAACTCGACTGCATAATTTGTGGTAGTGGGGGACTGCGTCCG	264	8	17	2958
chr1	-	148302770	148302805	G791.1	GCCGTGATCGTATAGTGGTTAGTACTCTGCGTTGTG	1207	10	104	14463	LINC01138
chr1	-	149812183	149812205	G794.1	TTTACGTGTACAAGGTGCTGAAG	22	2	3	151	HIST2H2BF
chr1	-	149842341	149842371	G801.1	CCTAACATCCAGGCCGTACTGCTCCCTAAGA	31	2	2	180	HIST2H2AA3
chr1	-	149860975	149860996	G805.1	CGGATCTCTGGCCTCATTTACG	79	2	4	409	HIST2H4B
chr1	-	153534609	153534637	G826.1	GTGGGTAATTGTACAATAAATTTTTTTTG	21	3	5	289	S100A6
chr1	-	153534713	153534752	G827.1	TATGTCACCTTCCTGGGGGCCTTGGCTTTGATCTACAATG	223	8	18	2464	S100A6
chr1	-	153606942	153606962	G831.1	ATATAAAGGCTGGATTTGGAG	15	2	2	88	S100A16
chr1	-	154548630	154548669	G843.1	TAATGTGTACTGTGAGCTGTCTTCTGTATAATGTATTTTG	11	3	13	196	UBE2Q1
chr1	-	155347692	155347720	G857.1	TTATTCGCTGTATCTGTGGCCTCTACAAG	14	2	2	152	ASH1L
chr1	-	155957803	155957822	G862.1	AAAGGGATGTTTCTGATCAG	12	2	2	64	ARHGEF2
chr1	-	155965059	155965093	G864.1	ATGGATGAGAAGGACTTTGCAGCTGACTCTTGGAG	12	2	3	80	ARHGEF2
chr1	-	160323431	160323475	G900.1	TATCTGGGGCAGATGATCGTCAAGTGAAGATCTGGCGCATGAATG	24	2	3	256	COPA
chr1	-	161447244	161447276	G908.1	ATTCGGCGCTCTCACCGCCGCGGCCCGGGTTCG	103	2	2	362	AL592295.3
chr1	-	161462051	161462072	G912.1	TTAGGATTCGGCGCTCTCACCG	113	2	2	517	AL592295.3
chr1	-	161469415	161469447	G914.1	ATTCGGCGCTCTCACCGCCGCGGCCCGGGTTCG	97	2	5	361	AL592295.3
chr1	-	161523885	161523917	G916.1	GCATTGGTGGTTCAGTGGTAGAATTCTCGCCTG	346	8	14	3792	VAC14
chr1	-	173864151	173864219	G924.1	AATACATGATGATCTCAATCCAACTTGAACTCTCTCACTGATTACTTGATGACAATAAAATATCTGATA	324	14	38	3950
chr1	-	173864380	173864445	G925.1	AACCAATGATGTAATGATTCTGCCAAATGAAATATAATGATATCACTGTAAAACCGTTCCATTTTG	152	4	21	1261
chr1	-	173864824	173864877	G926.1	ACTAACGCTGATGAGCAATATTAAGTCTTTCGCTCCTATCTGATGTATCTGGCG	615	11	61	7212
chr1	-	173865350	173865379	G927.1	AAAATGGAGATTAATCTTAAACTGAAACAG	207	3	8	1428
chr1	-	173865380	173865429	G927.2	TGTTAGTGATGATTTTAAAATTAAAGCAGATGGGAATCTCTCTGAGAAAG	192	4	7	1883
chr1	-	173865644	173865685	G928.1	TGTAATGATGTTGATCAAATGTCTGACCTGAAATGAGCATGT	958	9	57	4801	GAS5
chr1	-	173865965	173866028	G929.1	CCTGGATGATGATAAGCAAATGCTGACTGAACATGAAGGTCTTAATTAGCTCTAACTGACTAAA	15485	17	568	121151
chr1	-	173866634	173866677	G931.1	CTAGAATGATGAGGATCTTAACCACCATTATCTTAACTGAGGCA	622	11	32	7017
chr1	-	173867675	173867724	G933.1	TTGGTAGGGACATCTGAGAGTAATGATGAATGCCAACCGCTCTGATGGTG	1728	9	60	11690	GAS5
chr1	-	182944406	182944453	G944.1	TCTGATCTCGGAAGCTAAGCAGGGTCGGGCCTGGTTAGTGCTTGGATG	20	3	3	219
chr1	-	189609703	189609722	G945.1	GTTTGAGACTGGAGAACTAG	53	2	27	210
chr1	-	204403398	204403439	G957.1	TATATAACATAACTAATCTGTAAATTGTAATAAATATATTTG	23	3	23	287	PPP1R15B
chr1	-	204562411	204562442	G961.1	ACCGCCTGGGAATACCTGGTGCTGTAGGCTTT	277	4	11	2334
chr1	-	205713765	205713814	G962.1	TATTAACTAGTCCATGGGCTGAGACCGGGGCATCTCTTTTCTTCATACTG	17	3	9	187	NUCKS1
chr1	-	212364587	212364609	G976.1	TCCGGCTAGAATGTTTGTTGATG	15	2	3	132	TMEM206
chr1	-	217609895	217609929	G978.1	AAACTACTGTAAATTATATATTTTTCTCTTTTATG	11	2	11	187	GPATCH2
chr1	-	226368250	226368291	G986.1	ATCCTGGATCTCTCAAATCGCTTTTACACCCTGATCCCCCAC	17	3	10	132	PARP1
chr1	-	228394856	228394886	G995.1	ACTACGAGGCTGGACATCTCTCTTTCTACAG	26	2	6	228	TRIM11
chr1	-	228628146	228628191	G996.1	TACTTGGACGGGAGACCGCCTGGGAATACCGGGTGCTGTAGGCTTT	82	2	3	438
chr1	-	229432574	229432607	G998.1	TACGTGGCCATCCAGGCCGTGCTGTCCCTCTACG	45	2	2	341
chr1	-	229705168	229705205	G1000.1	CATTTAACCCCCCTGTACACAACTCACTCCTTTTAAAG	10	4	5	103	THSD4-AS1
chr1	-	230839570	230839597	G1001.1	ATCTTGTAAATAAAACTTCTGTTCCCAG	10	2	12	78	C1orf198
chr1	-	235111080	235111107	G1007.1	TTCTGTCACTACTCTGTAAATTAATCCG	58	5	71	456	TOMM20
chr1	-	240130611	240130632	G1011.1	AGTGATTGTTTACTAAAAACAC	16	2	32	80
chr1_KI270713v1_random	-	31633	31675	G1021.1	CTTTCACCGCTGCGGCCCGGGTTCGATTCCCGGTCAGGGAATC	14	2	22	97
chr10	+	3099286	3099311	G1022.1	CATGGTGGACGGAGGCTCAAACATCG	14	2	4	52	PFKP
chr10	+	5457547	5457587	G1026.1	TTTTTCACTGTACATTCCTCATTTTACATTCATTTAACCTG	19	5	19	361	NET1
chr10	+	13191327	13191350	G1037.1	ATTCAAACCACTCTGAGTAATCTG	12	2	13	71	MCM10
chr10	+	22321598	22321633	G1039.1	ATGGCCGCTTGGCTCGCATTCATTTTCTGCTGAACG	10	2	9	105	BMI1
chr10	+	27186713	27186753	G1041.1	TAATTTATCTTAACCTCAAAACTGTATATAAATCTTCAAAG	18	3	25	243	MASTL
chr10	+	27538094	27538123	G1042.1	ACATCTTTCTGTATATAAACTCTTTAACTG	11	4	9	132	RAB18
chr10	+	52315042	52315085	G1050.1	CATGCGTCACGCTATGTGCTGCCCCGGGAATTACTGCAAAAATG	13	3	9	91	DKK1
chr10	+	52316988	52317041	G1052.1	ATTGCAGTAAATTACTGTATTGTAAATTCTCAGTGTGGCACTTACCTGTAAATG	114	6	99	1272	DKK1
chr10	+	67764585	67764606	G1054.1	GAAGCGGGTGCTCTTATTTTTT	664	8	77	5006
chr10	+	72010896	72010925	G1065.1	ACTTTATCCCTCCTTCTTACTCTGGGCCAA	12	3	4	128	CHST3
chr10	+	76496049	76496070	G1073.1	AAACAGCCTTAATCTACAGCTA	16	2	31	49	LRMDA
chr10	+	80504741	80504768	G1079.1	TCTTCCTTGGAGTCGGGCTGTGGGCATG	11	2	8	91	TSPAN14
chr10	+	80520798	80520832	G1080.1	TCAACTCTGGCCTTCTTCAGCCTCTGTAGCACCAG	12	2	4	116	TSPAN14
chr10	+	87552876	87552903	G1084.1	TTCTGCAGTTCTCTCTTCTTTTCCTCAG	11	2	2	152	MINPP1
chr10	+	100363709	100363741	G1102.1	TGGGTGTGGGTGGGAGTGTGTCTGCTGAGTAAG	14	2	2	132	SCD
chr10	+	100963597	100963626	G1103.1	TAATTTAATCCTTTGTAGATACATTATTTG	16	2	18	219	SLF2
chr10	+	101007740	101007801	G1108.1	TTTATGGCCTCGTTTTCACTTGTATATTTTTCACACTGTAAATTTCTTGTACAAACCCAAAG	100	12	91	1378	LZTS2
chr10	+	123165300	123165335	G1141.1	CTCTTTTTGTAATATACTCTAAACCTGTTATTTCTG	198	12	181	2194	BUB3
chr10	+	125740574	125740600	G1143.1	TTTTGTCCGATGCTGCCATGAGTCTTC	27	2	19	278	EDRF1
chr10	-	811227	811253	G1151.1	TTGAGCGGGATGTAGATAAACTAAATG	14	2	15	83	LARP4B
chr10	-	812363	812383	G1152.1	TAGGGGACTGTGGCATTTAAG	12	2	2	70	LARP4B
chr10	-	19633682	19633708	G1164.1	CCTGGGAATACCGTGTGCTGTAGGCTT	29	2	3	221
chr10	-	28874392	28874412	G1167.1	AATACTGGGTGCTGTAGGCTT	12	3	4	80
chr10	-	43196122	43196151	G1172.1	TTGGGGTCCATTTTGTATATAACTTTTATG	18	3	20	250	RASGEF1A
chr10	-	49703054	49703111	G1179.1	ACTCTAGTCTGGCATGGTGAAGAGACACGAGAGGTGTAGAATAAGTGGGAGGCCCCCG	2493	6	46	9087
chr10	-	49703310	49703331	G1180.1	CCCAGTGCTCTGAATGCCAAAG	521	4	11	2073
chr10	-	59906179	59906202	G1186.1	ATAGAGCTGGAGACCTACAAACTG	15	2	2	34	CCDC6
chr10	-	67045469	67045503	G1187.1	TTCCCTCGCCGCGATCTATTGAAAGTCAGCCCTCG	2291	5	23	13724	CTNNA3
chr10	-	67045512	67045536	G1188.1	TTCTGGGTCGGGGTTTCCTACGTAG	265	2	2	1873	CTNNA3
chr10	-	67045546	67045578	G1189.1	TTCGTGGGGAACCTGGCGCTAAACCATTCGTAG	29489	8	320	155820	CTNNA3
chr10	-	71834408	71834449	G1209.1	TGCCAGAATGTGAAGACGGCGTCCGACTGCGGGGCAGTGAAG	33	3	3	156	PSAP
chr10	-	78025059	78025088	G1228.1	TTTCTGGACTATCTAAAGAGGCCCGGCCTG	12	2	12	77	POLR3A
chr10	-	86435458	86435486	G1234.1	TAACCTTTTTTCCATTGTAAATATTTCTG	31	7	33	429	WAPL
chr10	-	101785763	101785796	G1267.1	TAAATTTCTTTGTATATAAACTAGCTGTAACCTG	43	3	36	336	MGEA5
chr10	-	113703684	113703743	G1273.1	ACCTGCTTCTGGGTTGGGGTTTCGTATGTAGCAGAGCAGCTCCCTCACTGCGATCTATTG	158	5	95	1395
chr10	-	119050619	119050637	G1287.1	AAAGGCATAATCGATTGGA	16	2	5	59	EIF3A
chr10	-	119058248	119058285	G1290.1	CATCAGTTGGCTGTCACTGCATACCTTAAAAATTCACG	11	2	4	110	EIF3A
chr10	-	125002986	125003035	G1296.1	TTCAAGGCCCTGAGAGTGATCGTGCGGATAGGCAGTGGCTATGACAACGT	46	2	2	382	CTBP2
chr10	-	125667965	125667990	G1298.1	AATTTCCTTTGAAGCACTGGAACTTG	10	2	20	70	TEX36
chr10	-	128098158	128098175	G1299.1	ACTTGTAGATATAACTCG	31	2	32	154	MKI67
chr10	-	128099014	128099045	G1301.1	AATCGGCTTCATAAACTCCACTGGGAGCACTG	12	2	3	78	MKI67
chr11	+	811681	811711	G1328.1	TGGTCCATCCTAATCCCTGCCGGTCCATCTG	14	2	2	116
chr11	+	811787	811808	G1329.1	CTCACGTCATGGGCACTTCTAG	108	2	3	555
chr11	+	836259	836292	G1333.1	CCTGGCTGTCATGGCAGTGGGCATCTGGACGCTG	21	2	2	148	CD151
chr11	+	2390416	2390444	G1339.1	CTGGAGGCGTGATCCTGGGTGTGGCCCTG	24	2	3	165	CD81
chr11	+	2395015	2395032	G1342.1	CCGGCATCTGGGGCTTTG	34	2	5	165	CD81
chr11	+	8684277	8684318	G1354.1	AGTCCTCGAAGAGTAACTGCTGACCTTATTCACTGGCTGTGG	66	4	6	741	RPL27A
chr11	+	8685488	8685515	G1356.1	AGTACTCGAAGAGAATCTACTGGTCTTG	592	7	29	4655
chr11	+	9606520	9606550	G1363.1	ATTCGGCCTGATGGAGAGAAGAAGGCATATG	11	2	6	50
chr11	+	35211276	35211310	G1388.1	ACCCAAATCATTCTGAAGGCTCAACTACTTTACTG	9	2	2	72	CD44
chr11	+	35229280	35229312	G1389.1	ACAGCTGATGAGACAAGGAACCTGCAGAATGTG	56	2	10	242	CD44
chr11	+	61636947	61636968	G1415.1	TTCACCAAGGAGGACCTCACTG	25	2	2	98
chr11	+	62888499	62888543	G1433.1	CTTAACTTTGGGGATGTGGGCCTCTCGGCTGGACTGCAGGCCTCC	81	4	5	912	SLC3A2
chr11	+	63681664	63681691	G1435.1	TCCCATTCCATCTCCTCGTCGTCCTTCG	18	4	5	175	RTN3
chr11	+	65126451	65126471	G1468.1	TTTTTCTTTCCTTGGGCTCAG	13	2	5	138	MRPL49
chr11	+	65211872	65211901	G1479.1	TGATTTTAAAGGGGACTCTTCAGGGACTTG	39	2	3	329	CAPN1
chr11	+	65500548	65500568	G1484.1	ATTTGGTGAAGGAAGCTAGGA	26	2	2	122	MALAT1
chr11	+	65504966	65505007	G1488.1	ACTATAGAAGGAGCTTCCAGTTGAATTCACCAGTGGACAAAA	17	2	2	127	MALAT1
chr11	+	66063660	66063706	G1513.1	TGCCTGCTGGAATGGAGACCCCTGAACTCATTGAGCTGAGGAAGAAG	66	4	10	475	SF3B2
chr11	+	75400391	75400429	G1558.1	CTTCGATGAAGAGATGATGACGAGTCTGACTTGGGGATG	62	3	7	497	RPS3
chr11	+	75400694	75400760	G1560.1	TTTGTCGCTGATGGCATCTTCAAAGCTGAACTGAATGAGTTTCTTACTCGGGAGCTGGCTGAAGATG	81	4	18	669	RPS3
chr11	+	75404123	75404171	G1565.1	TTTGTGGATGGCCTGATGATCCACAGCGGAGACCCTGTTAACTACTACG	68	3	3	528	RPS3
chr11	+	75405616	75405648	G1570.1	TCTCCTTGGCAGCTGTATTCTGGAGTCTGGATG	48	3	4	446	RPS3
chr11	+	77886444	77886546	G1579.1	GCGGGTGTTGATGCCATGTGATTTCTGCCCAGTGCTCTGAATGTCAAAGTGAAGAAATTCAATGAAGCACGGGTAAACGGCGGGAGTAACTATGACTCTCTTA	5913	17	213	39238	AAMDC
chr11	+	77886647	77886694	G1580.1	GAATGGGCTTGGCGGAATCAGCAGGGAAAGAAGACCCTGTTGAGCTTG	2395	7	150	11469	AAMDC
chr11	+	85484047	85484106	G1584.1	GCACGAGACCGATAGTCAACAAGTACCGTAAGGGAAAGTTGAAAAGAACTTTGAAGAGAG	6211	9	133	37895
chr11	+	85484112	85484136	G1584.2	AAGAGGGCGTGAAACCGTTAAGAGG	3037	3	31	9080
chr11	+	90283935	90283965	G1587.1	AAGGATTATGAGGAGGTTGGTGTGGATTCTG	18	2	4	158
chr11	+	93721829	93721866	G1588.1	TTGTAACTATGATGGTTTCTACACTTGACCTGAGCTCA	61	6	13	469
chr11	+	108251025	108251050	G1597.1	CAGAGAATTCTGGAAGTTATTTACTG	12	2	13	95	ATM
chr11	+	108723224	108723245	G1599.1	ATACTGGTAATGAAGAACAGGA	13	2	2	32	DDX10
chr11	+	109603197	109603231	G1600.1	GGCCGTGATCGTATAGTGGTTAGTACTCTGTGTTG	51	4	53	610
chr11	+	119023559	119023582	G1613.1	CTCTTTCCTTCTGTATATACCATG	21	4	15	216	TRAPPC4
chr11	+	123301498	123301531	G1619.1	CAACACCCTGATTGCTCCTATCTGATTCTTTCTG	866	11	41	7813
chr11	+	130121701	130121741	G1625.1	TGCTGCCCTCAGACAAAGATTATTGGATCTGTGTCAAAAGA	42	3	7	319	APLP2
chr11	-	840436	840473	G1652.1	CTGGATGCCCTGGGCCTGAAGCGCTACTGCTGCCGCCG	25	2	3	134	POLR2L
chr11	-	3000953	3000991	G1660.1	TTCATGTAGGTTCGTGTCGTCGTTGGCTCTGAGACATTG	10	2	3	147	CARS
chr11	-	10509190	10509214	G1678.1	ATTTCAACTCAACTTGACCGCTCTG	14	2	4	108
chr11	-	10509344	10509416	G1680.1	TAGAGTGCTTAGTTGAACAGGGCCCTGAAGCGCGTACACACCGCCCGTCACCCTCCTCAAGTATACTTCAAAG	6258	11	65	34884
chr11	-	10509499	10509538	G1681.1	ACGTTAGGTCAAGGTGTAGCCCATGAGGTGGCAAGAAATG	216	2	2	1468
chr11	-	10509648	10509711	G1682.1	AGCCACAGCTTAAAACTCAAAGGACCTGGCGGTGCTTCATATCCCTCTAGAGGAGCCTGTTCTG	1036	9	23	9721
chr11	-	10510172	10510209	G1683.1	AATAGGTTTGGTCCTAGCCTTTCTATTAGCTCTTAGTA	298	7	11	4431
chr11	-	10801468	10801507	G1687.1	TCCAGCGTCCTGTGAGCGAAGATTATGAGATATGAGGGCA	155	5	9	1047
chr11	-	10801558	10801606	G1688.1	GCCCGATGATTATAAAAAGACGCGTTATTAAGAGGACTTTATGCTGGAG	55	2	5	504
chr11	-	10802123	10802151	G1689.1	ACGTCATCGTTCAAATCAACTCTTCAATG	13	3	4	113	EIF4G2
chr11	-	17074653	17074696	G1696.1	TTTTTCCTTATGTTGGCCAGTTCTTCCTTGGATGTCTGAGTGAG	25	2	9	436
chr11	-	21000879	21000906	G1698.1	CCTGGGAATACCGGGTGCTGTAGGCTGT	299	4	11	1788
chr11	-	27890199	27890248	G1706.1	TTCTGATGAGGAAGAAGAAAAGAAGGATGGTGACAAGAAGAAGAAGAAGA	111	4	10	321
chr11	-	27890908	27890937	G1708.1	ATCATCAATACTTTCTACTCGAACAAAGAG	23	2	5	179
chr11	-	46762464	46762496	G1716.1	GAGAGTGATGAGTTGCACACTGGTGGAGCCATG	120	2	2	823
chr11	-	57326280	57326318	G1731.1	CAGTCCCTGGATTCTGTGCCATCTGAACATGCTCTCCTG	17	2	3	165	SSRP1
chr11	-	57334502	57334541	G1739.1	CCGTGTTGCTCTGGGCCATGGACTTAAACTGCTTACAAAG	30	2	3	281	SSRP1
chr11	-	59550645	59550683	G1743.1	TTATCACGTCTGCTTTACACGCAGAAGGTCCTGGGTTCG	27	2	3	185
chr11	-	59551003	59551041	G1744.1	TTATCACGTCTGCTTTACACGCAGAAGGTCCTGGGTTCG	12	2	2	142
chr11	-	61965064	61965099	G1767.1	ATGACTGGGAGAGCGGGCTGAATGCAATGGAGTGTG	110	2	2	619	FTH1
chr11	-	61967492	61967525	G1770.1	TCACCTCTTCACCGCACCCTCGGACTGCCCCAAG	74	2	4	265	FTH1
chr11	-	62520337	62520372	G1777.1	ATGTCTCAGGACCCAAAGTGGACGTTGATGTTCCTG	12	3	3	91	AHNAK
chr11	-	62560282	62560336	G1796.1	TATCGCTTCCCTGAAGAACTCACTCAGACCTTCATGAGCTGCAATCTCATCACTG	41	2	2	348	AP002990.1
chr11	-	62571049	62571076	G1800.1	AATTCTGGGGCTGCTGGATGCTTACTTG	74	2	2	672	AP002990.1
chr11	-	62571847	62571888	G1801.1	AGGGTGATGATGGATTCTGTGTGTTTGAGAGCAACGCCATTG	17	3	4	166	AP002990.1
chr11	-	62608219	62608254	G1803.1	CACATGCTGTCGGTGTGGGACTGCAGCCGGGGAATG	12	2	2	81	EML3
chr11	-	62677637	62677660	G1825.1	ATTGACTGTTTTACTTTGCCCTTT	11	2	3	140
chr11	-	62832922	62832941	G1828.1	CCCACTTTGTAAATAAACTG	12	2	9	54	WDR74
chr11	-	62841611	62841643	G1829.1	TACTTCCAGGAACGGTGCACTCTCCCTTCGGGG	57	2	3	310	WDR74
chr11	-	62841679	62841717	G1830.1	AAATGGATTTTTGGAAATAGGAGATGGAATAGGAGCTTG	1233	8	63	8673	WDR74
chr11	-	62852910	62852928	G1831.1	AAGGAACTGTCTGAGGGAT	162	2	5	605
chr11	-	62853327	62853377	G1833.1	AATACCGCCCCAGTCTGATCAATGTGTGACTGAAAGGTATTTTCTGAGCTG	931	15	82	11254
chr11	-	62853666	62853731	G1834.1	TTTGTGATGACTTACATGGAATCTCGTTCGGCTGATGACTTGCTGTTGAGACTCTGAAATCTGATT	1964	25	103	22728
chr11	-	62853906	62853968	G1835.1	TTTCTATGATGAATCAAACTAGCTCACTATGACCGACAGTGAAAATACATGAACACCTGAGAA	765	9	19	3858
chr11	-	62854621	62854648	G1836.1	TTAATAGCATGTTAGAGTTCTGATGGCA	113	4	19	1105
chr11	-	62854667	62854690	G1837.1	ATGATTTGAATTGATAAGCTGATG	18	2	19	143
chr11	-	62855292	62855323	G1839.1	ATTAGTGGAGAAAACAGAAAATTCTGAGTAGC	335	5	19	2318
chr11	-	62855324	62855366	G1839.2	CTACGGGGATGATTTTACGAACTGAACTCTCTCTTTCTGATGG	387	7	18	4042
chr11	-	62855594	62855631	G1841.1	TTCCTATGATGAGGACCTTTTCACAGACCTGTACTGAG	191	3	5	2015	SNHG1
chr11	-	64769538	64769566	G1848.1	ATTATGATCCGGGGGAAAGGGTCTGTGAA	10	3	9	58	SF1
chr11	-	65855978	65856020	G1870.1	CCAGATAAGGACTGCCGCTATGCCCTCTATGATGCAACCTATG	71	3	3	509	CFL1
chr11	-	65856207	65856241	G1872.1	CCTCCGGTGTGGCTGTCTCTGATGGTGTCATCAAG	23	2	3	241	CFL1
chr11	-	67400731	67400773	G1879.1	ATCAAGTACCCCGAGAACTTCTTCCTGCTCCGTGGGAACCACG	10	2	2	88	PPP1CA
chr11	-	85990262	85990294	G1913.1	TATCTACTTTTACTACTAGGACACCTACTCATG	13	2	3	153	PICALM
chr11	-	90199000	90199030	G1915.1	TTGTTAATTATCCCTGACTGCTTCCCTACTG	11	2	12	131
chr11	-	90226117	90226135	G1916.1	ATGCAATCTATCTGCTGCT	13	2	22	69
chr11	-	93730617	93730647	G1918.1	TGGGTCATTTCAAAGAGGGCTTATGAGGCTG	36	2	3	318	TAF1D
chr11	-	93730750	93730793	G1919.1	TTCTAGGGACTCATTCATGTTCACTCACTGTACACTCATCTCTG	39	2	2	339	TAF1D
chr11	-	93730979	93731005	G1920.1	CTAGCAATCAGCTTATTGGGAACAGTT	257	4	12	1889	TAF1D
chr11	-	93731074	93731101	G1921.1	AATGGTCATTACCAAGGCTTTTAGAATG	240	6	12	2146	TAF1D
chr11	-	93731503	93731571	G1922.1	TGTTATGATGATGGGCGAAATGTTCAACTGCTCTGAAGGGGCTGAATGAAAATGGCCTTTCTGAACATC	946	13	65	7819
chr11	-	93732362	93732400	G1925.1	CTTTGTGCTTGTTAAACCTGGTATTTCTACTGATACAGT	57	3	4	843
chr11	-	93733227	93733299	G1927.1	TTCAGATGATGAATTTAACTGTTCAACTGCTGAATGATAACGGGCATGAACTAAAACTTAATTCTGACAGAGC	722	16	65	5759
chr11	-	93733465	93733497	G1928.1	TTAGATCTGTGGGAAGGAATTACAAGACAGTTG	819	9	35	6925	TAF1D
chr11	-	93733506	93733552	G1929.1	TTGGAAACGCCTCATAGAGTAACTCTGTGGTTTTACTTTACTCACAG	24	4	4	193
chr11	-	93733560	93733596	G1930.1	TTGAGGTCTATCCCGATGGGGCTTTTCCTGTAGCCTG	76	3	3	984
chr11	-	122146568	122146589	G1962.1	TGAGGTAGTAGGTTGTATAGTT	180	4	13	1592
chr11	-	122152275	122152296	G1963.1	AACCCGTAGATCCGAACTTGTG	79	2	5	387
chr11	-	123058075	123058119	G1966.1	AATTCAAGGTGTTGGCAACTACCTTCCTTGGATGTCTGAGTGACC	454	8	39	4328	HSPA8
chr11	-	123058281	123058299	G1967.1	ATTCTGGACAAGTGTAATG	24	3	3	97	HSPA8
chr11	-	123058896	123058977	G1971.1	CCAAAACCATTCGTAGTTTCCACCAGAAAGTCTTATGTTGGCCAGTTCCTTCCTTGGATGTTTGAGCGACCATTCTTCCTTA	1581	14	1630	15147	HSPA8
chr11	-	123059077	123059109	G1972.1	ACACAGACCTTCACTACCTATTCTGACAACCAG	21	2	3	130	HSPA8
chr11	-	123059334	123059376	G1974.1	CTTGGCTAATGATGGCAACACCTTCCTTGGATGTCTGAGCGAG	1116	9	67	8358	HSPA8
chr11	-	123059630	123059677	G1976.1	AATGCTGACCTGTTCCGTGGCACCCTGGACCCAGTAGAGAAAGCCCTT	104	5	8	645	HSPA8
chr11	-	123060168	123060186	G1979.1	CTGGTCTCAATGTACTTAG	8	2	3	40	HSPA8
chr11	-	123061275	123061301	G1983.1	TATTGATCTTGGCACCACCTACTCTTG	23	2	2	189	HSPA8
chr12	+	2800422	2800470	G2001.1	TATAAGAAGATCGTGTCTTGGCTGGAATATGAGTCTAGTTTTTCCAATG	16	4	6	278	FKBP4
chr12	+	6225448	6225485	G2009.1	CCATTGGACTATGGCTCCGATTCGACTCTCAGACCAAG	30	3	4	234	CD9
chr12	+	6238111	6238142	G2011.1	AAAGGTACTATATTTGCTAGACTCTAGACAAG	10	2	2	86	CD9
chr12	+	6510222	6510254	G2013.1	GCCACATGATGATATCAAGGCTGTTGTGATTCA	32	2	44	196
chr12	+	6528806	6528829	G2023.1	CCTCAGATTGCTGCCCTGGCCAAG	17	2	3	82	NCAPD2
chr12	+	6536494	6536528	G2024.1	ATTTGGTCGTATTGGGCGCCTGGTCACCAGGGCTG	46	2	7	390	GAPDH
chr12	+	6536703	6536749	G2025.1	ATTCCACCCATGGCAAATTCCATGGCACCGTCAAGGCTGAGAACGGG	59	2	3	379	GAPDH
chr12	+	6537614	6537670	G2028.1	AAGACTGTGGATGGCCCCTCCGGGAAACTGTGGCGTGATGGCCGCGGGGCTCTCCAG	94	2	2	422	GAPDH
chr12	+	6537902	6537956	G2029.1	GTCTCCTCTGACTTCAACAGCGACACCCACTCCTCCACCTTTGACGCTGGGGCTG	65	2	25	418	GAPDH
chr12	+	6870500	6870528	G2043.1	CCTCATCCAAACTGTATCTTCCTTTACTG	63	2	3	478	TPI1
chr12	+	6943829	6943878	G2048.1	CTTTTAGAATTTGTCTAGTAGGCTTTCTGGCTTTTTACCGGAAAGCCCCT	79	3	3	857	C12orf57
chr12	+	7191226	7191246	G2052.1	TTGGTGGCTGAATTCCTGCAG	14	2	2	96	PEX5
chr12	+	20551433	20551570	G2062.1	ATTGACAGATTGATAGCTCTTTCTCGATTCCGTGGGTGGTGGTGCATGGCCGTTCTTAGTTGGTGGAGCGATTTGTCTGGTTAATTCCGATAACGAACGAGACTCTGGCATGCTAACTAGTTACGCGACCCCCGAGCG	12579	37	575	139891	PDE3A
chr12	+	22687796	22687826	G2066.1	CATTCTCTTCCCTTTTGTAGAAATTTTTCTG	10	2	11	149	ETNK1
chr12	+	34203898	34203921	G2069.1	GGAATGCCGGGTGCTGTAGGCTTT	148	6	8	987
chr12	+	34205792	34205818	G2070.1	ACTGGGAATACCGGGTGCTGTAGGCTT	177	4	13	1217
chr12	+	48144078	48144101	G2073.1	ACTTCATTTTCAACCTGTACTCTG	16	2	4	156	PFKM
chr12	+	49272829	49272856	G2077.1	TTATACCGTGGTGACGTGGTTCCCAAAG	10	3	9	67	TUBA1C
chr12	+	49273025	49273068	G2078.1	CTGTTGCCGAGGCCTGGGCTCGCCTGGACCACAAGTTTGACCTG	20	2	3	145	TUBA1C
chr12	+	49758428	49758450	G2082.1	CTTCACCCTCAGTGCACTCTATG	10	2	7	63	TMBIM6
chr12	+	50456763	50456785	G2088.1	TAAGATTATGAGATCTGAGGGCT	276	4	10	1916	LARP4
chr12	+	52059240	52059265	G2093.1	CTGTAAATACAGGAAGAAAGAGCTTG	21	2	11	76	NR4A1
chr12	+	52949545	52949584	G2096.1	AGACTGGAGCCATTACTTCAAGATCATCGAGGACCTGAGG	33	4	7	213	KRT18
chr12	+	52951753	52951782	G2099.1	TCACCACACAGTCTGCTGAGGTTGGAGCTG	67	2	3	460	KRT18
chr12	+	54337278	54337299	G2118.1	TCAGTGCATCACAGAACTTTGT	30	2	4	204
chr12	+	54350593	54350613	G2120.1	TTCCCCAATCGATGCTCTCAG	11	2	12	54	COPZ1
chr12	+	57230947	57230992	G2132.1	CTGCAGAGGGAGAAGGACAGGCAGTGTCGTGGCCTGGAGCTCATTG	15	2	2	88	SHMT2
chr12	+	62603691	62603711	G2145.1	TGAGGTAGTAGTTTGTGCTGT	440	9	25	3932
chr12	+	65964525	65964556	G2150.1	CAATATATCCCCACTACTCAATACTACCTCTG	11	2	2	97	HMGA2
chr12	+	69589526	69589565	G2154.1	CGGGCACAACATTATCCTCAAAACTTCTTACTCATCACAA	10	2	5	95	CCT2
chr12	+	71924273	71924305	G2156.1	TTAACTCCTGTATATATCATTAAAATAAATCTG	24	3	24	283	TBC1D15
chr12	+	98595756	98595800	G2168.1	TATTATGCACTGTGTGGCTTTGGTGGGGTCTTAAGTTGTGGTCTG	17	4	9	166	SLC25A3
chr12	+	103931572	103931621	G2175.1	ATCTGGGTAAAAGTAGAGAAGGATCAAGGACGGATGATGAAGTAGTACAG	94	4	15	487	HSP90B1
chr12	+	103943801	103943824	G2184.1	TACGGATGGTCTGGCAACATGGAG	154	3	4	730	HSP90B1
chr12	+	103947655	103947681	G2187.1	AATTGTAAATTATACTCTCACCATTTG	154	9	163	1523	HSP90B1
chr12	+	110340912	110340945	G2201.1	CCCGCTGTTTTGCTCGAGTTGAACCCTCCCACAA	14	2	7	99	ATP2A2
chr12	+	110343272	110343301	G2203.1	ATTCCTGTTCAGCTGCTCTGGGTCAATCTG	37	2	2	363	ATP2A2
chr12	+	113386971	113387010	G2218.1	CAGGCCCTAGTGGCCCAGTATGGGGACTGGTTTTCTTATG	21	2	7	240	PLBD2
chr12	+	118246466	118246486	G2221.1	TTGCTATCGGGGACTACAATG	28	3	5	159
chr12	+	120282572	120282616	G2224.1	TGGGGACTTTTGCATTCAGGTTGGCAGGAACATCATTCATGGCAG	21	2	16	217
chr12	+	120440577	120440611	G2227.1	CACTGGTTTGGACCGTTACTCTGCACATGGACCAG	16	2	2	133	COX6A1
chr12	+	121831818	121831846	G2234.1	TTATCATGTAAATTCTGTACAAAGAATTG	40	3	42	327	SETD1B
chr12	+	131799651	131799682	G2251.1	TCTCTTACCTGTATATTTGTAAATATATCATG	11	4	12	142	SFSWAP
chr12	-	6328779	6328810	G2267.1	CTGTGGACTTTTGTACATACACTAAAATTCTG	60	5	32	520	TNFRSF1A
chr12	-	6581589	6581610	G2275.1	TTTGTCCTGGCCTATTTTTCTG	125	3	3	1471	CHD4
chr12	-	6967336	6967364	G2288.1	CCACCTGAGCGCAACCTTGGATCTGACAG	169	2	4	834
chr12	-	10722876	10722921	G2302.1	CCACGGGCACCGCGGCCGCCGCCTCTTTAGCCACCGCCGCCGGCAG	17	2	2	66	YBX3
chr12	-	21635545	21635582	G2307.1	ATACCCTGTGGGACATCCAGAAGGACCTAAAAGACCTG	59	2	5	239	LDHB
chr12	-	21643965	21644012	G2312.1	TTAATGTCTTCAAATTCATTATTCCTCAGATCGTCAAGTACAGTCCTG	20	3	6	252	LDHB
chr12	-	21654556	21654602	G2314.1	ATCACTGTAGTGGGTGTTGGACAAGTTGGTATGGCGTGTGCTATCAG	60	3	25	643	LDHB
chr12	-	31791709	31791729	G2320.1	TAAATTCTGTAAAATACTTTG	21	3	12	176	H3F3C
chr12	-	34219396	34219423	G2322.1	CTCCCTCGCTGCGATCTATTGAAAGTCA	1569	8	27	10989
chr12	-	34219715	34219737	G2323.1	CCATGGTAATCCTGCTCAGTACG	399	3	5	2338
chr12	-	46183971	46184019	G2327.1	ATTTGTATGTAAATATTATTGTAAATAAATAGGAGGCTGTATATTTTTG	10	2	10	200	SLC38A1
chr12	-	46358300	46358343	G2330.1	TGTATTAACTTTGTGTATATAGTGTAAATATCCCCACTGTACTG	49	8	34	497	SLC38A2
chr12	-	46358626	46358700	G2331.1	TTGTATATAATGTCAGGTTTGGGTCTTGGGTTCAAGTGTATATATTCCTGTAAGTTTCTTAACTGCATTTTGATG	93	10	85	1222	SLC38A2
chr12	-	48694314	48694355	G2341.1	ATTTCCCAGAGCTCTTCAGACACAACCATTGCAGGTTTAATG	11	2	2	130	CCNT1
chr12	-	49127802	49127833	G2359.1	TACCTGTAATATTTTTCCATCATATCTCAAAG	145	10	154	1717	TUBA1B
chr12	-	49128878	49128921	G2366.1	TCTTCAGGGCTTCTTGGTTTTCCACAGCTTTGGTGGGGGAACTG	27	2	3	341	TUBA1B
chr12	-	49994420	49994445	G2385.1	TAAATGAGATTGAGCAAAGAGGTCTG	13	2	11	67	RACGAP1
chr12	-	52899798	52899855	G2396.1	CGGCGCACAAAGACTGAGATCTCTGAGATGAACCGGAACATCAGCCGGCTCCAGGCTG	97	2	3	320	KRT8
chr12	-	52899909	52899957	G2396.2	TACGAGGATATTGCCAACCGCAGCCGGGCTGAGGCTGAGAGCATGTACC	336	4	21	1766	KRT8
chr12	-	52900011	52900050	G2397.1	CAGTCCCAGATCTCGGACACATCTGTGGTGCTGTCCATGG	45	2	3	437	KRT8
chr12	-	52904745	52904785	G2402.1	TTACGGTCAACCAGAGCCTGCTGAGCCCCCTTGTCCTGGAG	71	3	3	536	KRT8
chr12	-	52904819	52904860	G2403.1	TGGGCAGCAGCAACTTTCGCGGTGGCCTGGGCGGCGGCTATG	50	3	3	272	KRT8
chr12	-	56630778	56630813	G2417.1	TGATCCAGGCAGGACCAGGCTGCACTGAAGGGACAG	11	2	2	36	BAZ2A
chr12	-	56643712	56643749	G2424.1	CTCACTGATGAGTACGTTCTGACTTTCGTTCTTCTGAG	128	6	15	1680	ATP5B
chr12	-	56645059	56645100	G2426.1	CTTCTATGATGATTTTATCAAAATGACTTTCGTTCTTCTGAG	82	5	16	1542
chr12	-	57824658	57824679	G2440.1	TTCAAGTAATCCAGGATAGGCT	102	2	10	600
chr12	-	62022129	62022175	G2442.1	TTACACCAACCAGGACAGAAATCATTATCTTAGCCACCAGAACACAG	41	3	5	320	FAM19A2
chr12	-	76031031	76031050	G2450.1	AACTGCACTTCTCCAACATG	29	2	2	139	PHLDA1
chr12	-	88493985	88494021	G2458.1	AAACTAACCCATACAAAATATCCAACTCTGGATTCTG	18	3	6	144
chr12	-	89348398	89348432	G2461.1	ATTTTTGCTTGTGTTGTCGCAAAGGGGATAATCTG	15	4	11	183	DUSP6
chr12	-	89351644	89351676	G2465.1	CTCAAGGACGAGGGCTGCCGGGCGTTCTACCTG	15	2	4	79	DUSP6
chr12	-	93409379	93409418	G2469.1	TATGGCTTGTCTGGAAACTTCTGTAAATCTTATGTTTTAG	21	4	15	261	UBE2N
chr12	-	97876125	97876157	G2477.1	ACTGATTACTTGATGACAATAAAATATCTGATA	22	2	2	189
chr12	-	110533279	110533313	G2498.1	CAGGAATAGTTCTGTAAATACATTTAAATAAACTG	36	6	38	327	PPTC7
chr12	-	118034069	118034095	G2512.1	CATTTCTTTGGGATTGTGAATAGAATG	15	2	4	158	WSB2
chr12	-	120199147	120199179	G2531.1	TGGGCTTTGTGTTCACCAAGGAGGACCTCACTG	458	4	9	1837	RPLP0
chr12	-	120291760	120291805	G2538.1	AAATATAGTCGGCATTGGCAATTTTTGACAGTCTCTACGGAGACTG	368	11	44	5003
chr12	-	120293090	120293139	G2540.1	CAATATAGTCGGCACTGGCAATTTTTGACAGTCTCTACGGAGACTGAATT	759	15	119	9577
chr12	-	120293140	120293184	G2541.1	ATTGCTAATTGAAAACTTTTCCCAATACCCCGCCGTGACGACTTG	214	5	23	1579
chr12	-	123261402	123261434	G2558.1	TCTCCCTTTAATCTTCTCTTTTGTATACATTTG	10	2	10	165	CDK2AP1
chr12	-	124912281	124912342	G2564.1	ACACCATTGAGAATGTCAAGGCAAAGATCCAAGACAAGGAAGGCATCCCTCCTGACCAGCAG	18	2	5	64	UBC
chr12	-	124912599	124912673	G2564.2	AAAGAGTCCACCTTGCACCTGGTGCTCCGTCTCAGAGGTGGGATGCAGATCTTCGTGAAGACCCTGACTGGTAAG	27	6	8	205	UBC
chr12	-	124912790	124912872	G2564.3	TCTCAGAGGTGGGATGCAGATCTTCGTGAAGACCCTGACTGGTAAGACCATCACTCTCGAAGTGGAGCCGAGTGACACCATTG	27	4	9	185	UBC
chr12	-	124913262	124913333	G2568.1	CTCCGTCTCAGAGGTGGGATGCAGATCTTCGTGAAGACCCTGACTGGTAAGACCATCACCCTCGAGGTGGAG	25	6	8	180	UBC
chr12	-	127165928	127165991	G2571.1	GCTTCTGGGTCGGGGTTTCGTACGTAGCAGAGCAGCTCCCTCGCTGCGATCTATTGAAAGTCAG	66063	16	1209	540310
chr12	-	127165996	127166035	G2571.2	CACGTTCGTGGGGAACCTGGCGCTAAACCATTCGTAGACG	49560	8	476	294595
chr12	-	127166069	127166092	G2572.1	TCCTGGGAAACGGGGCGCGGCCGG	1520	2	7	2815
chr12	-	127166389	127166438	G2573.1	CTGAGGAGCCAATGGGGCGAAGCTACCATCTGTGGGATTATGACTGAACG	583297	10	9247	5038621
chr13	+	22803196	22803223	G2584.1	AATCCATGAGCTTTTTAACCCTGAGCAA	40	4	5	315
chr13	+	23135464	23135502	G2585.1	TTCTGGTTCCATTTTTCCTCTGTTCACAAACTACCTCTG	17	2	2	230
chr13	+	27255065	27255096	G2587.1	GCTTAATGATGACTGTTTTTTTTGATTGCTTG	381	10	26	6404
chr13	+	27255097	27255134	G2588.1	AAGCAATGTGAAAAACACATTTCACCGGCTCTGAAAGC	279	4	10	1933
chr13	+	29307622	29307666	G2590.1	TCTCCTCTGACTTCAACAGCGACACCCACTCTTCCACCTTCGACG	11	2	12	83
chr13	+	45002205	45002248	G2594.1	AGGATCGCTTGAGTCCAGGAGTTCTGGGCTGTAGTGCGCTATGC	77	4	4	799
chr13	+	68722762	68722781	G2600.1	TTTGAGACTAGGATGTTGAT	16	3	32	95
chr13	+	79553074	79553098	G2604.1	AAAACTCTTCCTGTAAATAACCATG	10	2	7	63	NDFIP2
chr13	+	97392303	97392326	G2613.1	ATCTGTATAATATTCTAATTTAAG	14	3	14	140	MBNL2
chr13	+	98015726	98015755	G2619.1	TTAAAAGACAAGATGAAGACTATGATGAAC	53	2	12	246	IPO5
chr13	+	99205763	99205811	G2621.1	ATTCGGCTGATCTGGCTGGCTAGGCGGGTGTCCCCTTCCTCCCTCACCG	48	7	10	565
chr13	+	113640868	113640889	G2632.1	TTTGTACACTCTTTTCTCTCCC	11	3	11	110	TFDP1
chr13	-	31148401	31148425	G2649.1	TTCCTTTTCCAATATCTCTGATCTG	15	3	14	162	HSPH1
chr13	-	44433858	44433898	G2655.1	TTTCATTGGCTGTCTGAGGAGGTGTGGACTTTTATATATAG	10	2	2	168	TSC22D1
chr13	-	44434568	44434607	G2656.1	AACTGGCTGCTGCGTGTGAACTGAACAGACGGAGAAGATG	32	2	4	165	TSC22D1
chr13	-	45337064	45337094	G2659.1	TAGGCTACTACTCATCAATTAACTTCTACAG	32	4	4	296	TPT1
chr13	-	45337291	45337329	G2661.1	TCATCCACACAACACCAGGACTTAAGACAAATGGGACTG	28	2	6	99	TPT1
chr13	-	109424135	109424206	G2685.1	CTTAAAACTCAAAGGACCTGGCGGTGCTTCATATCCCTCTAGAGGAGCCTGTTCTGTAATCGATAAACCCCG	1038	9	19	10109
chr13	-	109424215	109424282	G2685.2	ATACCCCACTATGCTTAGCCCTAAACCTCAACAGTTAAATCAACAAAACTGCTCGCCAGAACACTACG	503	4	7	3050
chr13	-	109424283	109424343	G2686.1	ACTACGAAAGTGGCTTTAACATATCTGAACACACAATAGCTAAGACCCAAACTGGGATTAG	2356	11	43	19865
chr14	+	16056345	16056374	G2696.1	CGCTGAGAAGACAGTCGAACTTGACTATCT	31	3	3	209
chr14	+	16057550	16057581	G2697.1	ACACATTGATCATCGACACTTGAATGCACTTG	23	3	34	134
chr14	+	20476414	20476461	G2701.1	CACGGCACTGTGGACTTCGAGTCTTTGGCTTCTCACTCATCACTAACA	13	2	6	132	PNP
chr14	+	20610176	20610197	G2702.1	TCTCTTCGGGGGCGTGGGTTCG	37	3	4	255
chr14	+	20625414	20625435	G2703.1	TCTCTTCGGGGGCGTGGGTTCG	50	4	5	341
chr14	+	22767974	22767995	G2707.1	TTGTTGCTGCAACTCCCTCACC	11	2	2	75	OXA1L
chr14	+	49586656	49586725	G2718.1	TTCTGGGCTGTAGTGCGCTATGCCGATCGGGTGTCCGCACTAAGTTCGGCATCAATATGGTGACCTCCCG	111	6	7	967
chr14	+	49586773	49586879	G2719.1	GTCGGAAACGGAGCAGGTCAAAACTCCCGTGCTGATCAGTAGTGGGATCGCGCCTGTGAATAGCCACTGCACTCCAGCCTGGGCAACATAGCGAGACCCCGTCTCTT	78	5	6	448
chr14	+	49894327	49894366	G2723.1	CCACCATCACCTCTTTCAATTGCCACTTTCTCTTCTTTTG	10	2	6	114	ARF6
chr14	+	52773292	52773332	G2726.1	TCATCATCTTGAGTACTCTGTGTGTATATATATATATATAG	11	2	12	186	STYX
chr14	+	60397799	60397840	G2731.1	TTCGCCATGGATGAGGATGGGGACGAGAGCATTCACAAACTG	16	2	7	76
chr14	+	89712596	89712640	G2757.1	TCCCCTTCCTCCCTCACCGCTCCATGTGCGTCCCTCCCGAAGCTG	26	2	2	159
chr14	+	92026494	92026513	G2759.1	CTTTATCGCCAGAGTCCCTG	7	2	3	39
chr14	+	96532607	96532635	G2764.1	CATCAACTCTTGTACATAAATTTTTCTTG	22	4	24	260	PAPOLA
chr14	+	102001589	102001625	G2776.1	TGCCGCTTGATCCGTGGCTGGGATGACCTCTTCAACA	23	3	15	196	DYNC1H1
chr14	+	102029656	102029689	G2786.1	GAGCAGCAGATGCACTTGAACGTGGGGCTCAGGA	140	4	4	622	DYNC1H1
chr14	+	102039023	102039057	G2790.1	TCAGCTGGAAAAATCTCTACTACAAGCTCTGAACG	13	2	2	100	DYNC1H1
chr14	-	20326453	20326498	G2809.1	TCCGTGTTTCAGCTGATCAGCCTGATTAAACACATGCTCTGAGCAG	58	2	4	429
chr14	-	20343071	20343115	G2810.1	CAGGGGACCTCATAACCCAATTCAGACTACTCTCCTCCGCCCATT	167	2	2	1583
chr14	-	34752760	34752783	G2846.1	TTTCTATGTATAACTTTTTAACTG	13	2	13	156	BAZ1A
chr14	-	49583625	49583675	G2851.1	TTGGACTAAATGCTCTTCCTTCAGAGGATTATCCGGGGCATCTACTCAATG	96	4	15	696	RPS29
chr14	-	49862550	49862598	G2855.1	AATAGCCACTGCACTCCAGCCTGAGCAACATAGCGAGACCCCGTCTCTT	143	6	20	1033
chr14	-	53956679	53956708	G2859.1	CTCCGGCTGAGTATCTAGCTTGTCTCCCCG	12	2	2	106	BMP4
chr14	-	58239911	58239943	G2862.1	CATGGGACTCTTAATCCCAGGGTCGTGGGTTCG	195	5	10	1712	C14orf37
chr14	-	63685107	63685139	G2864.1	ATAAATACTTCCCTTTTTGTAGATATTTTTCTG	17	5	16	263	SGPP1
chr14	-	74684486	74684512	G2890.1	TCTCCTGGGATTGGAAGGACCCCTATG	10	2	3	67	AREL1
chr14	-	75134291	75134311	G2891.1	AACTGTAGATAACTCTTAAAG	54	4	46	268	TMED10
chr14	-	77679888	77679919	G2900.1	TTGGGTGACCGTAGGCTACCATTATAACTGGG	16	2	17	127	ALKBH1
chr14	-	89875055	89875114	G2905.1	AGGGACAAGTGGCATTCAGCCACCTGAGATTGAGCAATAACAGGTCTGTGATGCCCTTAG	591	5	11	4272	AL137230.2
chr14	-	102081647	102081716	G2932.1	ACTAATCTCTGGCTGAGGGATGACTTACCTGTTCAGTACTCTACAATTCCTCTGATAATATATTTTCAAG	57	5	6	575	HSP90AA1
chr14	-	102081792	102081815	G2932.2	ATGAAGATGACCCTACTGCTGATG	26	2	2	141	HSP90AA1
chr14	-	102082170	102082197	G2933.1	AAACTGCGCTCCTGTCTTCTGGCTTCAG	28	2	2	194	HSP90AA1
chr14	-	102082198	102082233	G2933.2	ACAAGTCTGTGAAGGATCTGGTCATCTTGCTTTATG	60	2	2	567	HSP90AA1
chr14	-	102082270	102082306	G2933.3	AAACACCTGGAGATAAACCCTGACCATTCCATTATTG	19	2	2	121	HSP90AA1
chr14	-	102083052	102083099	G2935.1	AAAAAAACAAAGTTTGAGAACCTCTGCAAAATCATGAAAGACATATTG	98	3	9	633	HSP90AA1
chr14	-	102083114	102083225	G2935.2	ATTGAGCCCATTGATGAGTACTGTGTCCAACAGCTGAAGGAATTTGAGGGGAAGACTTTAGTGTCAGTCACCAAAGAAGGCCTGGAACTTCCAGAGGATGAAGAAGAGAAAA	166	9	17	840	HSP90AA1
chr14	-	102083240	102083299	G2935.3	AGACCAAGGACCAGGTAGCTAACTCAGCCTTTGTGGAACGTCTTCGGAAACATGGCTTAG	50	2	9	310	HSP90AA1
chr14	-	102083658	102083694	G2936.1	GCTTGGAATACACGAAGACTCTCAAAATCGGAAGAAG	930	5	34	3964	HSP90AA1
chr14	-	102083826	102083878	G2937.1	AAAAATGCTTAGAACTCTTTACTGAACTGGCGGAAGATAAAGAGAACTACAAG	96	4	9	462	HSP90AA1
chr14	-	102084489	102084530	G2939.1	CCCTTCTATTTGTCCCACGACGTGCTCCTTTTGATCTGTTTG	53	2	3	733	HSP90AA1
chr14	-	102084707	102084754	G2940.1	ATATTACTAATGAGGAGTACGGAGAATTCTATAAGAGCTTGACCAATG	44	3	12	395	HSP90AA1
chr14	-	102084808	102084850	G2941.1	ATGGTGACAAGAAGAAGAAGAAGAAGATTAAGGAAAAGTACAT	129	3	4	367	HSP90AA1
chr14	-	102084855	102084899	G2941.2	AAACCTGAAATTGAAGATGTTGGTTCTGATGAGGAAGAAGAAAAG	79	2	2	323	HSP90AA1
chr14	-	102085340	102085390	G2942.1	AAAGAAGACCAAACTGAGTACTTGGAGGAACGAAGAATAAAGGAGATTGTG	287	4	10	1319	HSP90AA1
chr14	-	102085858	102085907	G2943.1	ATATCTCTATGATTGGCCAGTTCGGTGTTGGTTTTTATTCTGCTTATTTG	61	5	6	983	HSP90AA1
chr14	-	102086031	102086075	G2944.1	ACTCTGGGAAAGAGCTGCATATTAACCTTATACCGAACAAACAAG	131	6	14	1034	HSP90AA1
chr14	-	102086255	102086282	G2945.1	ATCATCAATACTTTCTACTCGAACAAAG	22	2	4	172	HSP90AA1
chr14	-	102087002	102087031	G2947.1	TCCCGGTGTGGCTGTGCCGTTGGTCCTGTG	35	2	2	195	HSP90AA1
chr14	-	105141764	105141788	G2957.1	TGTACATATTAAAGGAAGCACTCTG	10	2	3	57	JAG2
chr15	+	34495747	34495778	G2964.1	CAGCGGCGACACTCCTGTGGACTTCTTCTTCG	23	2	6	201
chr15	+	38485251	38485285	G2967.1	TTTACTTTTTACTGTACATACTTATTTTCTAATTG	12	4	8	214	FAM98B
chr15	+	40394215	40394250	G2972.1	TCTACTTTTAAAATAAATACTTCTGTAAATATTCTG	10	3	10	149	KNSTRN
chr15	+	45201151	45201186	G2997.1	GCCGTGATCGTATAGTGGTTAGTACTCTGCGTTGTG	464	11	122	5495	LINC01138
chr15	+	64455187	64455223	G3001.1	AACTTAAACTCTTACCAAAATCTGTATATTTTTCTTA	14	2	14	210	TRIP4
chr15	+	65296075	65296125	G3004.1	CATAAATCTTTCGCCTTTTACTAAAGATTTCCGTGGAGAGGAACAACTCTG	43	3	5	242
chr15	+	65304702	65304763	G3005.1	ATAAATCTTTCGCCTTTTACTAAAGATTTCCGTGGAGAGGAACAACTCTGAGTCTTAAGCTA	201	7	17	1187
chr15	+	69452930	69452996	G3010.1	CCCTACACTCGCCCGCGCCATGGCCTCTGTCTCCGAGCTCGCCTGCATCTACTCGGCCCTCATTCTG	136	6	9	1094	RPLP1
chr15	+	77485304	77485323	G3021.1	TACACCTGTAGATATTACTG	12	2	12	72	HMG20A
chr15	+	78860586	78860618	G3022.1	CATGGGACTCTTAATCCCAGGGTCGTGGGTTCG	78	5	15	675	C14orf37
chr15	+	90448683	90448712	G3035.1	AATAGCGACTGGTACTTGAAGCAGCTCCTG	16	2	3	100	IQGAP1
chr15	-	23019278	23019310	G3062.1	GTGGAAACGGTGCGGCCTTACCTGCAGACGGTG	12	2	3	69	TUBGCP5
chr15	-	28111312	28111341	G3064.1	ATTATAAATATTTCAATTAATTTTACTCTG	11	3	13	152	HERC2
chr15	-	28236991	28237032	G3066.1	CTTCTCGGATTACACGCTTCGTATTTGGCAATGAGCACACCG	11	2	2	130	HERC2
chr15	-	30939665	30939696	G3069.1	CATTTTTCCCTCTGTAATTTTCTTCCTTCACG	22	2	23	329	MTMR10
chr15	-	40313038	40313085	G3074.1	AAAACAACCCAGCTCTGGAGAAACTGCTGCCTCATATCTGGGGGAATG	333	2	8	1026
chr15	-	45198642	45198677	G3086.1	GCCGTGATCGTATAGTGGTTAGTACTCTGCGTTGTG	1258	10	121	15100	LINC01138
chr15	-	45200449	45200487	G3087.1	CTCGCCGTGATCGTATAGTGGTTAGTACTCTGCGTTGTG	1254	10	101	15065
chr15	-	52937582	52937622	G3092.1	CTCTTCCTGGGGACAATGTGGGCTTCAATGTCAAGAATGTG	24	2	3	214	EEF1A1
chr15	-	52938324	52938370	G3094.1	AAAGGGCTCCTTCAAGTATGCCTGGGTCTTGGATAAACTGAAAGCTG	46	3	3	463
chr15	-	53044299	53044317	G3095.1	ATACTGTTTACCTCTAGAT	130	2	8	1032
chr15	-	58691314	58691334	G3097.1	TGTGCAGCAGCTCAAGGAATT	47	2	2	222
chr15	-	60347434	60347486	G3100.1	CCTAAGCATTGCCTGGCCTTCCTGTCTAGTCTCTCCTGTAAGCCAAAGAAATG	24	2	2	262	ANXA2
chr15	-	60351195	60351237	G3102.1	AACAAGCCCCTGTATTTTGCTGATCGGCTGTATGACTCCATGA	88	4	7	968	ANXA2
chr15	-	60382363	60382410	G3105.1	TCAAAGCCTATACTAACTTTGATGCTGAGCGGGATGCTTTGAACATTG	55	5	9	575	ANXA2
chr15	-	64072578	64072614	G3109.1	TACTCAATTTAAATCATTACTCTGTAAAATAAATAAG	13	2	17	152	FAM96A
chr15	-	64155855	64155887	G3110.1	ACTCACTTTTGTAACAAACTCCTACCAACACTG	17	2	2	89	PPIB
chr15	-	66499566	66499594	G3120.1	ATGAGAAGGCGGCGGTTGCAGGCAAGAAG	21	2	5	56	RPL4
chr15	-	66501236	66501315	G3123.1	TTATGATGAGATTCCACTTAAGGTCCGTGTTTCTGAAACAAATGATTTTGTGGAAGTTCTGATTTATGGCTGAAAGAGTT	175	9	20	2394
chr15	-	66502020	66502065	G3124.1	GGTCCGTGTTTCTGAAACACATGATATTTGTGGAAATTCTGACTTG	213	5	41	2182
chr15	-	66502811	66502851	G3125.1	TAAGCTGGTACAGAAGGTTGACGAAAATTCTTACTGAGCAA	10	2	2	74
chr15	-	66502866	66502911	G3126.1	TTGCAATGATGTCGTAATTTGCGTCTTACTCTGTTCTCAGCGACAG	261	7	13	3290
chr15	-	66503245	66503286	G3128.1	TCCGTGTTTCTGAACCACATGATTTTCTCGGATGTTCTGATG	180	7	23	2298
chr15	-	71164694	71164731	G3134.1	CATTTAACCCCCCTGTACACAACTCACTCCTTTTAAAG	13	6	7	134	THSD4-AS1
chr15	-	72199210	72199264	G3136.1	TTAGGGGCCTTAGGGCACTGGGCTGTTGTTCCATTGAAGCCGACTCTGGCCCTGG	162	4	7	1140	PKM
chr15	-	72199327	72199367	G3138.1	ACAGCTTCCTTTCCTGTGTGTACTCTGTCCAGTTCCTTTAG	74	2	2	1035	PKM
chr15	-	72199518	72199555	G3138.2	TAACGTGGCACTGGTAGGTTGGGACACCAGGGAAGAAG	238	3	7	569	PKM
chr15	-	72200481	72200521	G3140.1	CCTGGGCTGAGGACGTGGACCTCCGGGTGAACTTTGCCATG	146	2	3	827	PKM
chr15	-	72207137	72207177	G3143.1	ATGATTGGACGGTGCAACCGAGCTGGGAAGCCTGTCATCTG	85	3	6	499	PKM
chr15	-	72207233	72207269	G3144.1	AAATCCTGGAGGCCAGTGATGGGATCATGGTGGCTCG	26	2	9	155	PKM
chr15	-	72208751	72208802	G3146.1	CCTGCTGTGTCGGAGAAGGACATCCAGGATCTGAAGTTTGGGGTCGAGCAGG	134	4	7	597	PKM
chr15	-	72210388	72210429	G3148.1	CTTCTGACCCCATCCTCTACCGGCCCGTTGCTGTGGCTCTAG	85	3	7	557	PKM
chr15	-	72217411	72217462	G3149.1	ATTAAGTCTGGAATGAATGTGGCTCGTCTGAACTTCTCTCATGGAACTCATG	77	3	5	801	PKM
chr15	-	72218952	72218991	G3150.1	ATTCACCACCCATCACAGCCCGGAACACTGGCATCATCTG	56	2	17	274	PKM
chr15	-	72231146	72231181	G3151.1	CTGCACGCGCCGTGGCTCCGGATCTCTTCGTCTTTG	97	2	2	895	PKM
chr15	-	73560287	73560325	G3153.1	ATGTGTTGAACCTTATTCTTGTACATTCATTCAATCAAG	12	4	11	181	NPTN
chr15	-	75380655	75380686	G3158.1	ATACTACCTCGCCTGAGCTTCGTGAACATCTA	10	2	2	88	SIN3A
chr15	-	75639829	75639873	G3160.1	ACTTCGTCACGGCCTCGTCCTTCTGCCGCCGCCGCCTCCCCACCG	15	2	2	103	IMP3
chr15	-	93043449	93043476	G3176.1	TGTACATACTGTAAATTATTTATTAATG	17	3	19	201	RGMA
chr16	+	682466	682488	G3182.1	AATGGCTGGGTGGAGGACTACTG	25	2	3	122	STUB1
chr16	+	2519698	2519742	G3206.1	CTCGGCCTCTACGGTCTCATCGTCGCCCTCATCCTCTCCACAAAG	36	3	3	275	AC093525.2
chr16	+	2765011	2765052	G3214.1	CCGAGGAGTCGTTCTCCATCATCCCCAGAGCTCAACAACAAG	10	3	4	60	SRRM2
chr16	+	3021780	3021814	G3224.1	AGGAGACCGGCGGAGAGGGCTGCCCAGCTGTGGCG	28	2	4	76	TNFRSF12A
chr16	+	3175715	3175747	G3226.1	CATGAGACTCTTAATCTCAGGGTCGTGGGTTCG	26	3	3	221
chr16	+	3191525	3191557	G3227.1	CATGGGACTCTTAATCTCAGGGTCGTGGGTTCG	57	5	5	503	AJ003147.2
chr16	+	14266209	14266229	G3235.1	ATGTAGATATTTCTCTTATTG	14	2	14	140	MKL2
chr16	+	14881614	14881632	G3236.1	AACGACTGCAGCATTTACG	11	2	3	41	NOMO1
chr16	+	16009784	16009831	G3238.1	ATTTTTGCTGTGGATCGTCTGCTGGGCAGACCTCTTCTACTCTTTCTG	34	2	2	512	ABCC1
chr16	+	16265058	16265096	G3242.1	AGGATTGGTGCTGGAAGAACAAGAGCCTGGAGGTGGAAG	15	2	2	47	NOMO3
chr16	+	22297184	22297205	G3243.1	TCTCTTCGGGGGCGTGGGTTCG	54	2	5	373
chr16	+	23690222	23690247	G3250.1	TTATTTTTGTACATGTTCGGGTGTGG	18	2	15	219	PLK1
chr16	+	29844769	29844802	G3270.1	TGTGGACGTGCAGTCAGTGGAGCCTGTGGATCAG	27	2	2	195	MVP
chr16	+	30069500	30069546	G3283.1	TGCTGGCTGCTGTCTACAAGGCTCTGAGTGACCACCACATCTACCTG	47	2	4	467	ALDOA
chr16	+	30733896	30733938	G3292.1	TTATCAGTGAACGGACAGTGGAGGAGAACATCCTAAAAAAGGC	25	2	16	126	SRCAP
chr16	+	31131304	31131325	G3298.1	CCTGTAAATATGTATAGACCTG	14	2	6	92	KAT8
chr16	+	34160101	34160193	G3304.1	CCGGTACAGTGAAACTGCGAATGGCTCATTAAATCAGTTATGGTTCTTTTGGTCGCTCGCTCCTCTCCTACTTGGAAAACTGTGGTAATTCTA	647	10	20	5480
chr16	+	34160367	34160404	G3305.1	ACGACCCATTCGAACGTCTGCCCTATCAACTTTCGATG	1072	7	49	7633
chr16	+	34160642	34160696	G3307.1	GTGCCAGCAGCCGCGGTAATTCCAGCTCCAATAGCGTATATTAAAGTTGCTGCAG	478	7	13	2685
chr16	+	34160858	34160944	G3309.1	CAGGTCCAAGCCGCCTGGATACCGCAGCTAGGAATAATGGAATAGGACCGCGGTTCTATTTTGTTGGTTTATGGAACTGAGGCCATG	2499	9	46	11278
chr16	+	34161244	34161282	G3312.1	GAAGGGCACCACCAGGAGTGGAGCCTGCGGCTTAATTTG	1523	7	32	10566
chr16	+	34161414	34161489	G3313.1	CAACGAGACTCTGGCATGCTAACTAGTTACGTGACCCCCGAGCGGTCGGCGTCCCCCAACTTCTTAGAGGGACAAG	2175	11	51	12232
chr16	+	34161534	34161596	G3314.1	CCCTTAGATGTCCGGGACTGCACGCGCGCTACACTGACTGGCTCAGCGTGTGCCTACCCTACG	233	7	9	1568
chr16	+	34161681	34161701	G3315.1	TAAGTGCGGGTCATAAGCTTG	301	2	3	1801
chr16	+	34161810	34161841	G3316.1	CGCTGAGAAGACAGTCGAACTTGACTATCTAG	21	3	3	138
chr16	+	47504822	47504844	G3320.1	GTGGGATCCCGAGGCCTCTCCAG	339	2	3	1308	PHKB
chr16	+	68698888	68698923	G3344.1	CCTCCCATTCGGATGGATCTCTGCGTTTTTATACTG	10	2	4	136	CDH3
chr16	+	69463715	69463743	G3354.1	TTTTCCATTTCATCTGTATTTTATCTCCG	18	2	17	262	CYB5B
chr16	+	69703823	69703859	G3356.1	ACTCCCACTTGTAATAACTCCTTTAAAAAATTCCATG	10	2	11	109	NFAT5
chr16	+	70538040	70538070	G3357.1	TCTCTTCTCTGACATTTTTCTCTGGACACAG	34	2	4	438
chr16	+	70788694	70788726	G3363.1	GCATTGGTGGTTCAGTGGTAGAATTCTCGCCTG	132	8	18	1434	VAC14
chr16	+	70789507	70789539	G3364.1	GCATTGGTGGTTCAGTGGTAGAATTCTCGCCTG	125	6	17	1358	VAC14
chr16	+	81961948	81961980	G3371.1	CGACATCTGTCACCCCATTGATCGCCAGGGTTG	25	2	4	166	PLCG2
chr16	+	85806815	85806841	G3381.1	AACCCCATCCAGGGCTTAGCCTCCAAG	16	3	6	58	COX4I1
chr16	+	85806908	85806933	G3382.1	CTCTGTCACCGCCATGCAACTCCATG	13	2	2	76	COX4I1
chr16	+	89561429	89561461	G3394.1	TCGCGTGATGACATTCTCCGGAATCGCTGTACG	124	3	3	1032
chr16	+	89561462	89561501	G3394.2	GCCTTGATGAAAGCACATTTGAACCCTTTTCCATCTGATT	257	7	15	2759
chr16	+	89561608	89561646	G3395.1	ACCATCGGCATTTCTGTGGATCCGAGGAGGCGGAACAAG	34	3	5	140	RPL13
chr16	+	89936047	89936082	G3412.1	TGTTTATATTTTCGGGGATACTTAATAAATCTATTG	11	2	11	176	AC092143.1
chr16	-	369945	369981	G3415.1	TGGGGCGGCGAGGGCTGGATCCTGGGCCAAATATATG	14	2	3	92	MRPL28
chr16	-	636752	636777	G3417.1	ATTCCCATTCTTGCGACCCGGGTTCG	96	2	5	761
chr16	-	1962773	1962807	G3432.1	CTCTCCATCGTCCCCGTGCGCAGAGGCTACTGGGG	52	2	2	342	RPS2
chr16	-	1963078	1963105	G3434.1	CTCTCTCGGCTCTGCATAGTTGCACTTG	98	4	9	971
chr16	-	2155055	2155105	G3443.1	AGTCTGTGATGAATTGCTTTGACTTCTGACACCTCGTATGAAAACTGCACG	523	11	18	3740
chr16	-	2253914	2253967	G3449.1	ATAAACAGGCCACTGAAGCTCTCGCCCCTGTAACTTATACCCCACCCAGCTCAG	47	3	39	227	RNPS1
chr16	-	3180570	3180596	G3454.1	ACTCTTAATCTCAGGGTCGTGGGTTCG	123	2	2	1101
chr16	-	18791710	18791738	G3484.1	TTTAATCCTGTATTATTTCTTCTACTTTG	77	9	81	1224	ARL6IP1
chr16	-	28844700	28844738	G3523.1	AGACCCCAGTCATCGTAGGCTCTGCTCTCTGTGCCCTTG	18	2	8	170	TUFM
chr16	-	50869453	50869474	G3547.1	AATACCGGGTGCTGTAGGCTTA	2868	6	36	17165	AC025810.1
chr16	-	67674626	67674669	G3573.1	TGGGGACTGGGGCTTGCTTTATTAAGTGAGCTCTTGGGCTTTTG	11	2	2	185	GFOD2
chr16	-	70778249	70778281	G3601.1	GCATTGGTGGTTCAGTGGTAGAATTCTCGCCTG	351	7	9	3852	VAC14
chr16	-	70779077	70779109	G3602.1	GCATTGGTGGTTCAGTGGTAGAATTCTCGCCTG	331	4	5	3636	VAC14
chr16	-	71758409	71758429	G3604.1	CTGACACTCAAACTGCTGACA	157	2	2	626
chr16	-	71758438	71758458	G3605.1	ATCCATCGGCTAAGTGTCTTG	41	2	2	238
chr16	-	74467756	74467803	G3612.1	AGTGACATCAAAAACTTCTGTTCCGCTGTGCAATATGGCAACGCTCAG	13	2	2	154	GLG1
chr16	-	84977965	84978002	G3632.1	TATATAGCTCTGTCTTCAGTCCATGCTCTGATCCTTTG	13	2	3	173	ZDHHC7
chr16	-	87830119	87830155	G3638.1	AGTAATGACGTGTGTGGCTGGGACCTTCTTTATTCTG	28	3	3	303	SLC7A5
chr16	-	87831138	87831163	G3643.1	CAGGTGGACTGACTGTGTTGGGCAAG	30	3	4	99	SLC7A5
chr16	-	87831314	87831359	G3644.1	TTTGGGGACTCAGGACCAGATGTCCGTCTCTCTTGCTTGAGGAATG	39	3	9	278	SLC7A5
chr16	-	87832172	87832204	G3647.1	TGTCCAGTTTTGGAGGCTGAGTTCTGGTTCATG	38	3	4	359	SLC7A5
chr16	-	88760872	88760900	G3675.1	TTTCCTGGACACTGAGCTAATTAAACCTG	16	3	17	119	PIEZO1
chr16	-	89646599	89646627	G3692.1	AATGGCCTGGAGGTGCTGGACCAGCTCAG	14	2	2	60	CHMP1A
chr17	+	5019996	5020022	G3711.1	TGGTGGTCACTCTGGAGCCTTGTGAAG	15	2	4	96	KIF1C
chr17	+	5490771	5490802	G3716.1	TCCTTTTTCCAATTCTGTACATTAAATATATG	15	3	24	201	MIS12
chr17	+	7309717	7309739	G3722.1	AATGGCTTTGTGGTGCTCAAAGG	14	3	3	72	EIF5A
chr17	+	7419794	7419816	G3727.1	CTCTGTACACATTTTTAAACCTG	12	2	11	97	NLGN2
chr17	+	7446843	7446875	G3728.1	ACTACAGGCTGAGCTGGGACCCTGCGGAGCACG	21	2	4	80	CHRNB1
chr17	+	7501324	7501357	G3734.1	TCTAAGACTTACCAGGACATTCAGAACACTATTA	29	2	4	212	POLR2A
chr17	+	7501604	7501700	G3736.1	AACCGCATTCTTAACGATGCCCGAGACAAGACTGGCTCCTCTGCTCAGAAATCCCTGTCTGAATACAATAACTTCAAGTCTATGGTCGTGTCCGGAG	49	5	17	394	POLR2A
chr17	+	7509062	7509088	G3740.1	TCTACTATGAAATGCCTGACTTTGATG	21	3	4	132	POLR2A
chr17	+	7574713	7574741	G3745.1	TGTCCCTGACCTGGGTAGAGTGGCATCTG	116	3	4	909
chr17	+	8125746	8125778	G3758.1	GCATTGGTGGTTCAGTGGTAGAATTCTCGCCTG	143	8	25	1548	VAC14
chr17	+	8186948	8186973	G3760.1	GCTAAGGAAGTCCTGTGCTCAGTTTT	11	2	4	84
chr17	+	16381125	16381170	G3764.1	TTTGTGTCCCTGTGGGTGGACGTGGTTGGTGATTGGCAGGATCCTG	19	2	2	195	UBB
chr17	+	16439544	16439576	G3766.1	CGATAACTGACGACGTCTAATGTCTATCTGACC	51	2	2	433
chr17	+	16440063	16440106	G3767.1	TGCCGTCAGAAGCGATAACTGACGAAGACTACTCCTGTCTGATT	710	8	22	6060
chr17	+	16441266	16441298	G3768.1	ATTGTGTAGTGGTGAACCTATGGTTTTCTGAAG	252	6	253	2427
chr17	+	18238096	18238133	G3775.1	CCATGGAGGGTCCGCTCTCCCGGGTGAAGTCTCTCAAG	15	2	5	95	LLGL1
chr17	+	19061947	19061977	G3778.1	TTACTAGAGAAGTTTCTCTGAACGTGTAGAG	13	2	3	125
chr17	+	19062003	19062047	G3779.1	TAGCGTTTTCTCCTGAGCGTGAAGCCGGCTTTCTGGCGTTGCTTG	26	5	6	340
chr17	+	19062049	19062128	G3780.1	CTGCAACTGCCGTCAGCCATTGATGATCGTTCTTCTCTCCGTATTGGGGAGTGAGAGGGAGAGAACGCGGTCTGAGTGGT	416	17	112	4411
chr17	+	19188051	19188103	G3781.1	TTACTAGAGAAGTTTCTCTGAACGTGTAGAGCACCGAAAACCACGAGGAAGAG	35	6	7	249
chr17	+	19188104	19188151	G3781.2	AGGTAGCGTTTTCTCCTGAGCGTGAAGCCGGCTTTCTGGCGTTGCTTG	34	4	7	386
chr17	+	19188153	19188232	G3782.1	CTGCAACTGCCGTCAGCCATTGATGATCGTTCTTCTCTCCGTATTGGGGAGTGAGAGGGAGAGAACGCGGTCTGAGTGGT	408	17	131	4342
chr17	+	19452301	19452334	G3784.1	GCAGATCTTGGTGGTAGTAGTAAATATTCAAATG	230	8	231	2081
chr17	+	19452376	19452406	G3785.1	AGCAGTTGAACATGGGTCAGTCGGTCCTGAG	128275	6	2395	736716
chr17	+	19601322	19601351	G3786.1	AAGACCCTATGGAGCTTTAATTTATTAATG	26	3	3	278
chr17	+	19860880	19860899	G3787.1	TAGAATTCTCGCCTCCCACG	18	2	4	86
chr17	+	20785584	20785620	G3790.1	TACCGCTGGCACATCAACTTCACCACATTCTTCATTG	13	3	7	133
chr17	+	21300942	21300989	G3792.1	CACGGTCGACTGTTTCTACACTGTCACCTTCTACGGGGCACTATTCAG	10	2	10	116	MAP2K3
chr17	+	22522111	22522136	G3794.1	ATAGGTTTGGTCCTAGCCTTTCTATT	26	3	4	308
chr17	+	22524413	22524460	G3798.1	ACCTCGATGTTGGATCAGGACATCCCAATGGTGCAGCCGCTATTAAAG	132	5	16	925	MTRNR2L1
chr17	+	28678927	28678953	G3801.1	ATGGCATCCGGGCTCTGGACACCACTG	12	2	4	56	SUPT6H
chr17	+	28720568	28720615	G3804.1	TTTTAATCTCCTGACACTTGTGATGTCTTCAAAGGAACCACTGATGCA	498	14	34	7603	RPL23A
chr17	+	28722584	28722625	G3805.1	TGCAGATGATGACACTGTAAAGCGACCAAAGTCTGAACAAAG	71	2	2	263
chr17	+	28723442	28723491	G3807.1	AAAAATCATTATTGGAAAAGAATGACATGAACAAAGGAACCACTGAAGTG	435	2	3	1114
chr17	+	30117130	30117153	G3811.1	AAGCTCGGTCTGAGGCCCCTCAGT	68	4	13	318	NSRP1
chr17	+	34962966	34962993	G3817.1	TTGTAAATATTGTACATAGTTAAATCTG	11	4	10	116	ZNF830
chr17	+	35639645	35639689	G3820.1	AGCCAGATGCTCGAGCAGCTATGATTTGGATTGTGGGAGAATATG	19	2	11	198	AP2B1
chr17	+	35889670	35889717	G3823.1	AGTAGCTGCGCTCCCCTGCTAGAACCTCCAAACAAGCTCTCAAGGTCC	13	2	2	86
chr17	+	39203021	39203093	G3839.1	CCAGAGAAGGTCACATGGATGAGGAGAATGAGGATTTTGCGCCGGCTGCTCAGAAGATACCGTGAATCTAAGA	143	9	23	1241	RPL19
chr17	+	39984408	39984449	G3854.1	TTCTGTATAAGGCTGTGCAGGGCTTCTTCACTTCAAATAATG	28	2	4	339	PSMD3
chr17	+	39994963	39995002	G3855.1	CTTCTCATCGTGGTGGAGCTGTTGCTGGGGGAGATCCCTG	23	3	13	231	PSMD3
chr17	+	45104919	45104948	G3887.1	CTCAAGTTTGGCATAGGGGACGGCAACCTG	11	2	4	58	NMT1
chr17	+	47650199	47650253	G3891.1	CCGGGCCGTCGTCTTAGGAGGAGTCGCCGCCGCCGCCACCTCCGCCATGGAGCTG	39	2	3	202	KPNB1
chr17	+	47652756	47652799	G3893.1	AGTTGCAGCTGGTCTACAAATCAAGAACTCTTTGACATCTAAAG	48	4	7	538	KPNB1
chr17	+	47664201	47664245	G3897.1	TTACAAGGGATAGAATTCTGGTCCAATGTCTGTGATGAGGAAATG	26	2	2	288	KPNB1
chr17	+	48061358	48061404	G3916.1	TTTTATAAATTATTTTCCTTGTAGATTTTATTTTTAATTTATCTCTG	10	5	12	208	NFE2L1
chr17	+	49192546	49192563	G3918.1	TTAGCACTCTGGACTTTG	12	2	5	79
chr17	+	51161757	51161795	G3943.1	AGAGTGCAGAGAAGGAGATCGGCTTGTGGTTTCACCCTG	32	2	2	261	NME1
chr17	+	51170009	51170039	G3947.1	CCAGGCACCATTCGTGGGGACTTCTGCATTC	34	2	2	256	NME1-NME2
chr17	+	59660458	59660502	G3958.1	ATTTGGCTCTGAGAATGGCTGTACGTAATAACTTAGCCGGTGCTG	18	2	3	189	CLTC
chr17	+	59661578	59661627	G3960.1	CTTTGTAGGCCTGTACTTCAGCAAGGGCGAAAACAGCTTTTGGAGAAATG	18	2	8	159	CLTC
chr17	+	59685681	59685714	G3972.1	GAGCTTGTCTGTTTACCTGTTACGATCTTTTAAG	12	3	5	120	CLTC
chr17	+	59841273	59841296	G3974.1	TAGCTTATCAGACTGATGTTGACT	1638	9	86	13240
chr17	+	63819119	63819149	G3977.1	TCTTCTATCTCATTGTATTTTTTTTAACTTG	20	4	22	358	DDX42
chr17	+	64146068	64146154	G3980.1	TAGGGGGGCCGGCCTGCTGTGATGACATTCCAATTAAAGCACGTGTTAGACTGCTGACGCGGGTGATGCGAACTGGAGTCTGAGCCT	1299	12	49	7793	SNHG25
chr17	+	64146364	64146391	G3982.1	CTTCCTCGTGGCGCCGGGGGTCAATCTG	29	2	2	137	SNHG25
chr17	+	67738169	67738201	G3985.1	TTTTTGACTATAGTATAAATTCTGTACATGATG	35	3	5	457	NOL11
chr17	+	67740717	67740745	G3986.1	AATTGGAGGCAAAGAAATGTGGACTTGGA	155	3	3	896
chr17	+	67740765	67740799	G3987.1	CTCTCCGCAGGCTCAAGATCAACCATCCCACATAG	51	2	22	284
chr17	+	68037364	68037406	G3991.1	AGGCGTCGCAGAATAGAGGTCAATGTGGAGCTGAGGAAAGCTA	12	2	4	53	KPNA2
chr17	+	68043114	68043153	G3994.1	TAATCTTACCTGGACACTTTCTAATCTTTGCCGCAACAAG	17	2	2	154	KPNA2
chr17	+	68046725	68046751	G3998.1	AACAGTTCCAACTGTACATACATACTG	207	4	198	1251	KPNA2
chr17	+	68046811	68046833	G3999.1	CATCCTGTAAATAAACATTCAAG	32	2	31	161	KPNA2
chr17	+	74763439	74763481	G4008.1	ACCAAGCTGCTGGTGGTGGACAGGGAAACTGACGAGTTCTTCA	23	2	3	187	SLC9A3R1
chr17	+	75742457	75742480	G4024.1	CCCCCGGCTACTACACCCTCACTG	10	2	2	34	ITGB4
chr17	+	76558832	76558866	G4032.1	TATCTTTTGTGAGGAGGTCTGACTTGCTGAGGCTC	259	8	14	3133	SNHG16
chr17	+	76561114	76561152	G4034.1	TCCATGATGATTTCAAGTTATCCCTGTCTGAAGGCAAAG	80	5	21	639
chr17	+	76561153	76561187	G4035.1	AAAGGCCTTTCTGTGTGGAATTTGAATATCTGAAA	1022	11	35	12208
chr17	+	76561649	76561673	G4036.1	TTAGTTATCCCTGTCTGAAAATCTG	160	5	8	1243	SNHG16
chr17	-	1661732	1661777	G4111.1	ACAGATGTAGGTATCACACACTTTCGTTCAGGAATGAGCCATGAAG	28	2	6	298	PRPF8
chr17	-	1676021	1676050	G4117.1	AAGTCTCGGTTGAACCAGTCTCAGAGGGAG	32	2	2	184	PRPF8
chr17	-	1676582	1676612	G4118.1	ATCCGCCGAGGGGCCACTGTGGACAAGACTG	42	2	4	141	PRPF8
chr17	-	1679131	1679157	G4122.1	CTGGACTGGGTGGAGGTTGGGCTCCAG	75	2	3	447	PRPF8
chr17	-	1713914	1713935	G4129.1	AAGCTGCCAGTTGAAGAACTGT	48	2	8	227	MIR22HG
chr17	-	2330322	2330352	G4132.1	TTTTATTCATATCGTCTGAACCTGTCTGAAG	56	2	5	706
chr17	-	4946652	4946698	G4158.1	CATGGATCTTCGTACCAAGAGCACCGGTGGGGCCCCCACCTTCAATG	37	2	3	245	PFN1
chr17	-	4948278	4948344	G4160.1	TCAGGACGCGGCCATCGTGGGCTACAAGGACTCGCCCTCCGTCTGGGCCGCCGTCCCCGGGAAAACG	51	2	3	216	PFN1
chr17	-	7466037	7466076	G4169.1	CTTCATCCATCCCAAACGGCTGCAGACCCATGAGGCCCAG	13	3	3	75	ZBTB4
chr17	-	8173508	8173542	G4176.1	ATTAGAACATGATGATTGGAGATGCATGAAACGTG	63	4	15	369	TMEM107
chr17	-	17512536	17512570	G4199.1	ACTGGGCGTCGTGCTCGTGCTCTCCAGCTTCTTTG	12	2	2	142	PEMT
chr17	-	19063920	19063999	G4215.1	CTGCAACTGCCGTCAGCCATTGATGATCGTTCTTCTCTCCGTATTGGGGAGTGAGAGGGAGAGAACGCGGTCTGAGTGGT	804	16	41	8612
chr17	-	19112420	19112458	G4218.1	TATTGGGGAGTGAGAGGGAGAGAACGCGGTCTGAGTGGT	218	4	9	820	AC007952.4
chr17	-	19112459	19112496	G4218.2	CAACTGCCGTCAGCCATTGATGATCGTTCTTCTCTCCG	611	12	33	7230	AC007952.4
chr17	-	19112501	19112542	G4219.1	CGTTTTCTCCTGAGCGTGAAGCCGGCTTTCTGGCGTTGCTTG	65	4	6	852	AC007952.4
chr17	-	19190029	19190108	G4220.1	CTGCAACTGCCGTCAGCCATTGATGATCGTTCTTCTCTCCGTATTGGGGAGTGAGAGGGAGAGAACGCGGTCTGAGTGGT	848	16	50	9002
chr17	-	35151122	35151257	G4259.1	CCGCGACCTCAGATCAGACGTGGCGACCCGCTGAATTTAAGCATATTTGTCAGCGGAGGAAAAGAAACTAACCAGGATTCCCTCAGTAATGGCGAGTGAACAGGGAAGAGCCCAGCGCCGAATCCCCGCCCCGCGG	215655	16	1470	1148128
chr17	-	35151260	35151286	G4259.2	TGTGGGGCCCAAGTCCTTCTGATCGAG	1208	6	22	6192
chr17	-	38731800	38731821	G4267.1	AATACCAGGTGCTGTAGGCTTT	601	4	9	4094
chr17	-	38852864	38852907	G4271.1	AAGTGGCAACATGTGTTGTTTGCTTCAATCGGTGGTGTGACAAG	110	2	2	1260
chr17	-	41523836	41523874	G4283.1	CGGCAGAATCAGGAGTACCAGCGGCTCATGGACATCAAG	82	2	2	267	KRT19
chr17	-	41524972	41524998	G4288.1	TTTGAGACGGAACAGGCTCTGCGCATG	155	3	4	857	KRT19
chr17	-	41525190	41525252	G4289.1	AACTCCAGGATTGTCCTGCAGATCGACAATGCCCGTCTGGCTGCAGATGACTTCCGAACCAAG	96	2	5	617	KRT19
chr17	-	42404702	42404737	G4320.1	ATCACCGAGGAGTCGGACGCCGTGCTGGTGGACAAG	31	2	2	102	CAVIN1
chr17	-	44322472	44322509	G4337.1	CAATGGTGTCCTGGAGCCTCTGTACCTGTGCCCAAATG	18	2	2	119	SLC25A39
chr17	-	47823502	47823543	G4352.1	CTTGGATGTTAGTTCTCCACCCTCGAGGTGTACGCTGTGAAA	14	2	2	180	MRPL10
chr17	-	48579905	48579925	G4355.1	ACCCTGTAGATCCGAATTTGT	52	2	5	355
chr17	-	50133807	50133838	G4359.1	AGGGCCGCATCTCTGTATATAATATATATATG	14	3	22	132	PPP1R9B
chr17	-	50383140	50383183	G4363.1	TTCCTGGGCTGTGCTGAAGCTGCTGCTGCTGCTGCTGCTATTTG	18	2	2	216	LRRC59
chr17	-	53757462	53757488	G4370.1	TTGCTATCGGGGACTACAATGGCCACG	58	2	4	334
chr17	-	57791345	57791387	G4371.1	AACAGCAGTTGAACATGGGTCAGTTGGTCCTGAGAGATGGGTG	2597	9	54	16144	AC015845.2
chr17	-	64749683	64749705	G4396.1	CATCCTGTAAATAAACATTCAAG	22	3	16	116	KPNA2
chr17	-	68019897	68019930	G4399.1	CTGGGGATTGTGGGTTCGAGTCCCATCTGGGTCG	655	4	8	4123
chr17	-	75034447	75034464	G4407.1	CCAGGGATTGTGGGTTCG	98	3	5	471
chr17	-	75318136	75318162	G4411.1	ACCTATGTACTTAATCCTTTAACTCTG	20	2	10	190	GRB2
chr17	-	75319229	75319268	G4413.1	CCAATTTGTCTCCTACTCTGTGTAAATATTTTTCCCTCCG	31	4	34	415	GRB2
chr17	-	75778545	75778565	G4415.1	TAAATTCTGTAAAATACTTTG	27	5	11	232	H3F3C
chr17	-	75827922	75827955	G4419.1	TTTGCGGTGGGGCTGGGTCCCCGGTGGGGACTTG	14	2	4	122	UNC13D
chr17	-	76734158	76734186	G4439.1	AATATTCTGTATTATAACCATTGTTTCTG	25	3	24	250	SRSF2
chr17	-	76734206	76734244	G4440.1	GAAGCAAATGGTTGTAACTTTGTAAGTACTTATAACATG	14	4	12	145	SRSF2
chr17	-	77162251	77162305	G4447.1	AGGAGCCAATGGGGCGAAGCTACCATCTGTGGGATTATGACTGAACGCCTTTAAG	584016	10	9353	5042060
chr17	-	78174153	78174175	G4450.1	TCCCAGGGGCTTATCTCTTCAAG	17	4	6	113	TK1
chr17	-	78971681	78971704	G4460.1	ATTCCCAGTGCCCTGGACACCAAC	90	2	2	346	LGALS3BP
chr17	-	78976007	78976036	G4471.1	CCAGCGTCGTCTGCCGGGCCCTGGGCTTCG	35	2	3	152	LGALS3BP
chr17	-	80135298	80135338	G4477.1	ATTCTGCTCTCTTTTCTTATTTACATGTAAATAATACATTG	26	7	20	470	EIF4A3
chr17	-	80139708	80139745	G4482.1	ATTCGTCGCAGAAGCCTAAGGACACGTGCTATCAAAAT	12	2	13	83	EIF4A3
chr17	-	81510152	81510216	G4489.1	TTTCCTTTCTTAGCTGATGTCTTTGGCCAGAACACCGTGGGCTGTTACTTGCTTTGAGTTGGAAG	94	4	11	800	ACTG1
chr17	-	81510271	81510304	G4490.1	TTCTGGGATTTCTCTAGAGGCTGGCAAGAACCAG	26	2	5	203	ACTG1
chr17	-	81510320	81510361	G4490.2	TCTGTGTGGCCAGCAGCCTCTGATCTGTGCAGGGTATTAACG	21	4	4	130	ACTG1
chr17	-	81510935	81510979	G4495.1	ACAGGATGCAGAAGGAGATCACCGCCCTGGCGCCCAGCACCATGA	61	3	3	197	ACTG1
chr17	-	81511281	81511364	G4497.1	TGCGCGACATCAAGGAGAAGCTGTGCTACGTCGCCCTGGACTTCGAGCAGGAGATGGCCACCGCCGCATCCTCCTCTTCTCTGG	325	7	17	2298	ACTG1
chr17	-	81511381	81511469	G4497.2	CCATCCTGCGTCTGGACCTGGCTGGCCGGGACCTGACCGACTACCTCATGAAGATCCTCACTGAGCGAGGCTACAGCTTCACCACCACG	287	7	18	1631	ACTG1
chr17	-	81511524	81511572	G4498.1	CTGTCCCTCTACGCCTCTGGGCGCACCACTGGCATTGTCATGGACTCTG	168	2	3	1062	ACTG1
chr17	-	81512016	81512065	G4500.1	GAAGTACCCCATTGAGCATGGCATCGTCACCAACTGGGACGACATGGAGA	180	3	11	604	ACTG1
chr17	-	81845901	81845942	G4512.1	TCAAGGTGCTTGTTGGGAAGAACTTTGAAGACGTGGCTTTTG	71	3	4	816	P4HB
chr17	-	81846564	81846585	G4514.1	CATCCTCGAGTTCTTTGGCCTG	44	2	2	340	P4HB
chr17	-	81847306	81847332	G4516.1	AACAACTTTGAAGGGGAGGTCACCAAG	17	2	3	45	P4HB
chr17	-	81869331	81869373	G4527.1	TGCTGAAGGAGGGTGTGGAGTACCGGATAAAAATCTCTTTCCG	26	3	10	246	ARHGDIA
chr17	-	81888366	81888388	G4529.1	TGGCGCTGGAGGTTTTGGTGGTG	11	2	2	86	ALYREF
chr17	-	81932536	81932575	G4534.1	TTTATAAGTTGGTTTCCAGCCCCCAGTGTCCTGACTTCTG	10	2	3	147	PYCR1
chr17	-	82082101	82082151	G4560.1	AGAGGCGTGCCCTGAGCTGGACTACTTTGTGGTCTTCTCCTCTGTGAGCTG	60	2	3	307	FASN
chr17	-	82085101	82085140	G4570.1	AAGACTCTTCCCGGCCTGTGTGGCTGAAGGCCATCAACTG	51	2	3	319	FASN
chr17	-	82091516	82091562	G4591.1	TGGCGGCAACGTGGGCATCAACTCCTTTGGCTTCGGGGGCTCCAACG	30	2	2	229	FASN
chr17	-	82093367	82093407	G4595.1	CACTGGACACAGCCTGCTCCTCCAGCCTGATGGCCCTGCAG	22	2	3	115	FASN
chr18	+	31548626	31548660	G4617.1	AAAATGTAAATATCACTTGTGTACTCAAACAAAAG	19	4	23	141	DSG2
chr18	+	58748090	58748130	G4626.1	TTATATGTATATAACAAAATATTTTCATTGTGACCACTCTG	12	3	10	170	MALT1
chr18	+	79754436	79754460	G4632.1	TTTCTGTAAATCTATTTCATATCTG	15	3	17	178	CTDP1
chr18	+	80012976	80013002	G4634.1	ACGACCTGCTTCTGGGTCGGGGTTTCG	2107	8	61	14857
chr18	+	80135641	80135662	G4635.1	CCTCTGTAAATACTCTACAAAG	15	3	15	75	ADNP2
chr18	-	6462177	6462204	G4638.1	CTACCTGCGATCTGTGTTTGCTCTGACG	25	2	2	240
chr18	-	35992780	35992801	G4650.1	CATTTAATCACTGTATACTATG	12	2	13	95	RPRD1A
chr18	-	49489263	49489308	G4661.1	TTGCTGTGATGACTATCTTAGGACACCTTTGGAATAACTATGAAAG	991	12	72	11562
chr18	-	49491283	49491347	G4662.1	CTGCAGTGATGACTTTCTTAGGACACCTTTGGATTTACCGTGAAAATTAATAAATTCTGAGCAGC	1453	13	51	11355
chr18	-	49491664	49491717	G4663.1	CATTTCTTAGGACACCTTTGGATTAATAATGAAAACAACTACTCTCTGAGCAGC	129	2	7	1245	RPL17
chr19	+	581353	581398	G4687.1	TTCCTCGCAGGGCCGGTCAGAGCTACACATTGAGAACCTGAACATG	27	2	2	195	BSG
chr19	+	811421	811446	G4700.1	ACATAATCTCTGTATTATATACTTTG	14	4	13	155	PTBP1
chr19	+	1032622	1032663	G4703.1	TTCGAGGCCAACGACCTGTTTGAGAGTGGGAACATGACGCAG	25	3	3	167	CNN2
chr19	+	1272466	1272509	G4722.1	TCCTTCCAATGGCTGTGTGTTTAAAGATTGTGGGAGCTTCGCTG	25	2	3	307	CIRBP
chr19	+	1495326	1495362	G4730.1	TTCGGCTACGGAGCGTCTCTGCTGTGCAATCTCATCG	11	2	2	104	REEP6
chr19	+	3121040	3121088	G4744.1	TGGACCTGAACCCCGACAGCGACAAGATCATCTACTCACACTTCACGTG	24	3	7	132	GNA11
chr19	+	4941545	4941568	G4759.1	ACTGTCGGATCATCTTCGTGGACG	11	2	10	67	UHRF1
chr19	+	5641796	5641834	G4763.1	TGTGTTGGATGAAGCAGAAATTGATAATGGAAGCGTTGC	15	2	3	135	SAFB
chr19	+	8466336	8466382	G4786.1	TGGAATAGGCACTGTTACTTTTGAACAGTCCATTGAAGCTGTGCAAG	14	2	8	134	HNRNPM
chr19	+	9830079	9830103	G4789.1	TTTGTAAAAACTCACCTTAATAAAG	15	4	15	101	UBL5
chr19	+	10109764	10109789	G4791.1	CGGCTGATGACAGCACTTCTGCTGAG	19	2	4	110
chr19	+	10109807	10109829	G4792.1	TCCAAAGTAAACGCCCTGACGCA	108	2	3	321
chr19	+	11131329	11131364	G4809.1	AGTCCCGTCCCTGCCCAGAACCCTTCCTGAGACCTC	11	2	2	66	LDLR
chr19	+	12792190	12792215	G4822.1	TCAAAGCCCTGGACGATCTGCACAAG	38	2	2	150	JUNB
chr19	+	13135511	13135538	G4842.1	TACACGGCTGGCTTCCTGCAGATCCAGG	24	2	5	139	NACC1
chr19	+	14565075	14565113	G4861.1	CTCGGCAACTTCTCCATCCACATGGCCCTGCGGGACCTG	11	2	3	84	TECR
chr19	+	18030803	18030832	G4882.1	GTGGTGGGCCAAATCACTGTGGACATGATG	11	2	2	67
chr19	+	18388474	18388515	G4892.1	CACCTGCGACTGTCGCCGCCGCCGTCGCAGTCGGACCAACTG	167	4	7	925	GDF15
chr19	+	18389123	18389147	G4896.1	AACTGTGTATTTATTTAAAACTCTG	53	7	58	493	GDF15
chr19	+	18846046	18846068	G4901.1	TTGGCTGAGTTGAACTTCGAGGA	79	3	37	452	UPF1
chr19	+	34366394	34366435	G4922.1	AACCTGGTGACGGAGGACGTGATGCGGATGCTGGTGGACTTG	31	3	5	207	GPI
chr19	+	35249078	35249117	G4941.1	CAGGCCGGGACGCGGTCGTCTTCGTGTGGCTTCTGCTTAG	28	2	3	254	LSR
chr19	+	35267380	35267432	G4948.1	CCGGGCCTACATGCCCCCGCGGAGCCGCAGCCGGGACGACCTCTATGACCAAG	68	3	5	252	LSR
chr19	+	35383364	35383399	G4953.1	CTCTGGACTGCATCCTACCACCAACTCGTCCAACTG	18	3	3	108
chr19	+	35575609	35575662	G4955.1	ATCAGACCCCAGAAAAGGTGTTGGTTGATATAGACAGCAGGACGGTGGCCATGG	81319	10	2536	671584	AD000090.1
chr19	+	35575686	35575725	G4956.1	TGTAACAACTCACCTGCCGAATCAACTAGCCCTGAAAATG	624	7	27	3905
chr19	+	35575807	35575841	G4957.1	AAACGATCTCAACCTATTCTCAAACTTTAAATGGG	1178	10	62	11066
chr19	+	38193633	38193664	G4965.1	CCAGGGCTGCCCAGCGACGTGCTCTTCACCAG	10	2	2	48	SIPA1L3
chr19	+	38289145	38289191	G4967.1	AAGGCAGGATTCTGAAGACCACTCCAGCGATATGTTCAACTATGAAG	24	2	2	204	SPINT2
chr19	+	38647849	38647874	G4975.1	AGGACGACTGGGACCGGGACCTGCTG	11	2	2	21	ACTN4
chr19	+	45032623	45032667	G5050.1	TTCAAGACGCCGCCCTACGAGGACCTGGAGATTGTCGAGCCCGTG	11	2	2	86	RELB
chr19	+	46559063	46559101	G5055.1	CTTCAAGATCATCAGCAATGCCTCCTGCACCACCAACTG	14	2	13	93
chr19	+	47003003	47003029	G5066.1	GCAGGGACTGTGGCAGCTTATGTCCAA	13	2	3	75	ARHGAP35
chr19	+	48913501	48913521	G5082.1	TGGGAGGAGCTGGATGGACTG	11	2	2	42	NUCB1
chr19	+	48966700	48966713	G5089.1	TATCTCTTCGAAAG	16	2	2	78	FTL
chr19	+	49490013	49490047	G5095.1	CCATGAGATCAACCCCATGCACCGCTCTGAGACCT	121	5	10	630	RPL13A
chr19	+	49490923	49490971	G5100.1	CAACTACCTACATTGTTTGATCCTCATGAAAGCAGCACTGGCTGAGACG	167	5	5	1931
chr19	+	49491175	49491218	G5102.1	GGCAGATGATGTCCTTATCTCACGATGGTCTGCGGATGTCCCTG	71	4	9	725
chr19	+	49491219	49491255	G5102.2	TGGGAATGGCGACAATGCCAATGGCTTAGCTGATGCC	278	6	116	2033
chr19	+	49497763	49497802	G5106.1	TGGGCACTGCTGAGAAAGCCACTTGGTAAAACTGATGCCG	130	4	12	755
chr19	+	49497946	49497983	G5107.1	ACCATTGTCATCCGCCGAGACTATCTGCACTACATCCG	56	2	2	442	RPS11
chr19	+	49499526	49499572	G5109.1	GTGACATCGTCACAGTGGGCGAGTGCCGGCCTCTGAGCAAGACAGTG	74	4	4	382	RPS11
chr19	+	49681948	49681981	G5115.1	CAACTCCATGTTTCATAACCGGCACCTCTTCAAG	34	3	4	225	PRMT1
chr19	+	51692618	51692639	G5131.1	CACCCGTAGAACCGACCTTGCG	57	2	2	169
chr19	+	52212756	52212783	G5135.1	TTTGCCAAGGTGCTGGAGCTGGACAACG	58	2	3	222	PPP2R1A
chr19	+	52225754	52225790	G5141.1	CTGACCCAGGACCAGGATGTGGACGTCAAATACTTTG	20	2	2	107	PPP2R1A
chr19	+	53865610	53865639	G5143.1	CCACCGTGACCGGCCTTCACTCTTCAAATG	12	2	2	82	AC008440.3
chr19	+	55668510	55668544	G5163.1	TTGTGTCCACTGTGGTCCCCGACTCTGCCCACAAG	30	2	21	222	U2AF2
chr19	+	58393150	58393173	G5170.1	CATGCCTTCGAGATCATACACCTG	41	2	2	228	RPS5
chr19	+	58548363	58548392	G5184.1	TTTCAGTGGGACCTCAATGCCTGGACCAAG	120	6	9	791	TRIM28
chr19	+	58549958	58549980	G5192.1	CGTGTACTGCTGGCCCTATTCTG	69	2	7	518	TRIM28
chr19	+	58550390	58550422	G5194.1	TGCAGTCCATCATCGGCCTGCAGCGCTTCTTCG	38	4	6	304	TRIM28
chr19	-	1577695	1577720	G5219.1	CAGCGTGAGGACGGGACTCTGGTCTG	20	2	2	96	MBD3
chr19	-	2120953	2120983	G5232.1	TTCGCCGTGTCCCAGATGTCTGCGCTGCTTG	13	2	2	128	AP3D1
chr19	-	3547986	3548018	G5246.1	CTGGTGGTGGGTGTCGGCGCCGTGTTCTCACTG	24	3	4	203	MFSD12
chr19	-	3976541	3976598	G5250.1	AAAGAAGGCATCCCTGCCCTGGACAACTTCCTGGACAAATTGTAGGCGGCCCTTCCTG	72	2	2	529	EEF2
chr19	-	3979365	3979414	G5255.1	AGCATATCATCGCGGGCGCCGGCGAGCTGCACCTGGAGATCTGCCTGAAG	176	2	36	532	EEF2
chr19	-	3979967	3980004	G5257.1	TGGGCCTCGTGGGCGTGGACCAGTTCCTGGTGAAGACG	81	2	5	502	EEF2
chr19	-	3980528	3980575	G5258.1	ATCATGGGGCCCAACTATACCCCTGGGAAGAAGGAGGACCTCTACCTG	29	2	4	146	EEF2
chr19	-	3980585	3980613	G5258.2	TCTTCTCGGGGCTGGTCTCCACTGGCCTG	35	2	5	296	EEF2
chr19	-	3981428	3981449	G5260.1	TTTGATGCGATCATGAATTTCA	115	3	7	818	EEF2
chr19	-	3982263	3982304	G5261.1	GGGCCTGCCGAGCGGGCCAAGAAAGTAGAGGACATGATGAAG	82	2	3	170	EEF2
chr19	-	3982537	3982572	G5262.1	ATTCGTGATGACTGATCATTTCTTCACTTTGACCAG	53	3	3	674
chr19	-	3982860	3982899	G5263.1	CTCTACCAGACTTTCCAGCGCATCGTGGAGAACGTGAACG	147	3	5	977	EEF2
chr19	-	3984263	3984287	G5266.1	TCTGTCATCGCCCACGTGGACCATG	87	2	2	516	EEF2
chr19	-	4685703	4685742	G5281.1	ATCTTCCATTTCCACACGCGCTCGGATGTGCGGCTCTACG	17	2	3	162	DPP9
chr19	-	6212173	6212199	G5299.1	TCTGCTCTCGGGCTCTACTCAGACTAG	13	2	2	102	MLLT1
chr19	-	6414024	6414056	G5302.1	TTCTGTTTGGGGGCTTCTGTTTTGTTTGGCGAG	13	2	2	110	KHSRP
chr19	-	7886975	7887002	G5322.1	CCTAGGAATACCGGGTGCTGTAGGCTTG	266	4	8	1655
chr19	-	7991750	7991799	G5330.1	AAGACCACATGGCCGAAGACTGCAGGGGTGACATCGGGAGAACGAATTTG	20	2	12	71	ELAVL1
chr19	-	12643326	12643372	G5356.1	ACATGGTGGCTGAAAAGCGGCTCATCCCAGATGGCTGTGGGGTCAAG	35	2	3	275
chr19	-	12643897	12643942	G5358.1	CCACTGAAGATCCTGGTGTCGCCATGGGCCGCCGCCCCGCCCGTTG	36	2	2	244	AC010422.3
chr19	-	12703598	12703621	G5363.1	ATGTATTCGTACTGTCTGATGGGG	70	2	2	594
chr19	-	12706449	12706485	G5365.1	GAACTGATTTATCGCGTATTCGTACTGGCTGATCCTG	160	5	6	1438
chr19	-	14514977	14515003	G5391.1	TTGGTGTACACTCAAAACCTGTCCCCG	12	2	2	66	DNAJB1
chr19	-	14515526	14515557	G5392.1	ATTCCCAGACCCTGTACACTCCTCCTTTTCTG	17	2	7	172	DNAJB1
chr19	-	21113125	21113157	G5434.1	ACCACCTGGGAATACCGGGTGCTGTAGGCTTTG	309	7	11	2309
chr19	-	22694823	22694852	G5435.1	TTGGTGGAGCGATTTGTCTGGTTAATTCCG	468	4	5	4673	AC024563.1
chr19	-	24000277	24000312	G5437.1	ACTCTAGTCTGGTATGGTGAAGAGACATGAGAGGTG	17	2	18	109
chr19	-	24001292	24001349	G5439.1	CAGGTGCAGATCTTGGTGGTAGTAGCAAATATTCAAATGAGAACTTTGAAGGCCGAAG	4211	13	97	35464
chr19	-	24001582	24001617	G5440.1	GTGTTGGTTGATATAGACAGCAGGACGGTGGGCATG	497	4	11	3283
chr19	-	24001951	24001975	G5442.1	TGTAGTGGTCCTGACGTGCAAATCG	39	3	7	165
chr19	-	24002162	24002216	G5444.1	TCTAACACGTGTGCGAGTCAGGGGCTCGCACGAAAGCCACTGTGGCGCAATGAAG	56	4	59	169
chr19	-	24002980	24003007	G5445.1	AGTTCAAGAGGGCGTGAAACCGTTAAGA	2576	5	28	11907
chr19	-	24003010	24003040	G5446.1	GTAAGGGAAAGTTGAAAAGAACTTTGAAGAC	2154	6	22	10478
chr19	-	24003200	24003229	G5447.1	CTTGTGGGGGCCCAAGTCCTTCTGATTGAG	546	6	251	3152
chr19	-	38309272	38309295	G5452.1	TATTACTTTGCTGTGGACACCATG	23	2	8	129	YIF1B
chr19	-	38840150	38840179	G5458.1	CTCATGGTCTATGGCTTGGATCAATCTAAG	36	2	3	353	HNRNPL
chr19	-	38844025	38844069	G5459.1	CCTCTCTCAATGGGGCTGATATCTATTCTGGCTGTTGCACTCTGA	18	2	6	218	HNRNPL
chr19	-	39433235	39433276	G5465.1	ATAAGCCCATCGTGACTCAAAACTCACTTGTATAATAAACAG	60	6	28	420	RPS16
chr19	-	40114635	40114670	G5472.1	TTACTAGAGAAGTTTCTCTGAACGTGTAGAGCACCG	26	3	3	245
chr19	-	41564223	41564247	G5482.1	TTTTAAGCAGGAGGTGTCAGAAATG	1495	5	19	8930
chr19	-	46775451	46775482	G5509.1	CTGGGGGTGCTCTTTGGACACTGGATTATGAG	16	2	6	109	SLC1A5
chr19	-	48615344	48615402	G5529.1	CCGACGGGCCAGCCGAGGCTACAAAAACTAACCCTGGATCCTACTCTCTTATTAAAAAG	147	3	8	1249	RPL18
chr19	-	48616091	48616115	G5530.1	GACTCCCCTAAGGGCTGTGGCACTG	90	2	3	425	RPL18
chr19	-	48617316	48617360	G5532.1	TTTATGAGTCGCACCAACCGGCCGCCTCTGTCCCTTTCCCGGATG	66	3	8	503	RPL18
chr19	-	50799498	50799529	G5550.1	CCTCCATGATGTCCAGCACTGGGCTCCGACTG	346	5	18	2362
chr19	-	50802367	50802415	G5552.1	CTCCCATGATGTCCAGCACTGGGCTCTGATCACCCCTGAGGACACAGTG	197	5	7	1342
chr2	+	8684105	8684148	G5577.1	CCTACTGAATGCTGTGTATATATTTATATATAAATATATCTATT	12	3	12	228	ID2
chr2	+	10131061	10131125	G5582.1	TCCTGTTTATTGTTAGTTTTCTTCATCATTTATTGTATAGACAATTTTTAAATCTCTGTAATATG	35	5	18	529	RRM2
chr2	+	11584826	11584871	G5584.1	GGAGGATCGCTTGAGTCCAGGAGTTCTGGGCTGTAGTGCGCTATGC	95	3	4	914
chr2	+	20448557	20448587	G5587.1	ATATAATTTTATTTTCGGAGCTAAGATGGTG	10	3	11	119	RHOB
chr2	+	23999963	23999996	G5589.1	ACTTTTGGTTCGAGTACTATTGAACTCTCTCCTG	14	2	2	194	UBXN2A
chr2	+	26135076	26135113	G5591.1	CAAAATAAACCACTCTGTCCATTTTTAACTCTAAACAG	25	2	23	245	RAB10
chr2	+	27050855	27050885	G5596.1	ATTCCGGCTCGAAGGACTTCGTCTGTAATTT	41	2	12	339	AGBL5
chr2	+	27225145	27225193	G5600.1	ACCATTGAGCTGACCGAGGATCGACGGGCCTTTGCTGCCAGAATGGCAG	65	5	9	461	CAD
chr2	+	27236285	27236308	G5604.1	TAACAGCTGTGGACTGGCACTTTG	18	2	2	117	CAD
chr2	+	28913664	28913690	G5608.1	GTGCTGTGATGATGCCTTAATATTGTG	18	2	4	186
chr2	+	28913709	28913747	G5609.1	TAAAATGAGGACCTACAATTCCTTGGCTGTGTCTGAGCA	167	6	10	1694
chr2	+	28927107	28927145	G5610.1	TTTCAGAGATGACACCTTTCTCTTGGCTGTCTGAGCATT	66	4	4	876	WDR43
chr2	+	28928023	28928059	G5611.1	TTCCAGTGATGCCTCTTTTCTCTTGGCTGTCTGAGCA	20	2	3	246
chr2	+	38482041	38482147	G5617.1	CCATCCGAGGGCACCTGGAAAACAACCCAGCTCTGGAGAAACTGCTGCCTCATATCTGGGGGAATGTGGGCTTTGTGTTCACCAAGGAGGACCTCACTGAGATCAGG	200	7	20	740
chr2	+	54631462	54631494	G5633.1	TTTCTGCGGCAGCGGCTGCAGGCCCTGGACACT	27	2	2	152	SPTBN1
chr2	+	54637750	54637779	G5635.1	ATGAGGTTGAAGGACAACAGGGATCTACAG	25	3	4	103	SPTBN1
chr2	+	70088949	70088970	G5646.1	AATTTAAAAATCACATTCTCTG	12	2	2	94	PCBP1
chr2	+	72760548	72760568	G5648.1	ATCAAATGTCTGACCTGAAAT	89	2	2	529
chr2	+	78701645	78701695	G5663.1	TCTGGCACGGTGAAGAGACGTGAGAGGTGTAGAATAAGTGGGAGGCCCCCG	375	5	10	1440
chr2	+	98618366	98618408	G5673.1	TAAAACTTGTAAATAAACTATCATCTTTGTAGATATCTTAAAG	39	7	43	468	UNC50
chr2	+	108684591	108684630	G5683.1	TTTTATAACCTGCTCTCCTTGTGAATTCTTCCTTCAAATG	39	5	43	451	LIMS1
chr2	+	112663272	112663300	G5688.1	AATTCCTGTACATATTTCTCTACTTTTTG	29	5	30	405	SLC20A1
chr2	+	117012444	117012466	G5690.1	ATCGTTTTTTCACTGACCCGGTG	132	3	3	1166
chr2	+	135665446	135665465	G5698.1	TCACAGTGAACCGGTCTCTT	16	2	2	94
chr2	+	142860574	142860593	G5699.1	GCTCATGCTGTAGGTATCTC	21	2	22	125
chr2	+	152760468	152760492	G5701.1	ACAACTGTAAACATTATTTTTTTAG	10	2	12	98	ARL6IP6
chr2	+	170966232	170966279	G5706.1	TAGGCATCCTGTAAATAATTCCAAGGGGAAAACTAAACGAGGACGTGG	21	4	21	121	GORASP2
chr2	+	176337821	176337842	G5710.1	TGTATACATTAAAATAATTCTG	10	3	9	81	MTX2
chr2	+	181916172	181916194	G5717.1	TTCCCTTCATTCCATCCACTCTG	18	2	4	158	SSFA2
chr2	+	197474212	197474250	G5724.1	AAACTGTAAATTTAAACCTTTTAATTATCACCTTACCTG	13	2	14	181	COQ10B
chr2	+	197503327	197503370	G5725.1	TCATGTAAATAATTTCCATATTTCTCTTTTATAATAAACTAATG	14	7	14	264	HSPE1
chr2	+	200822422	200822467	G5727.1	TTATCTTCTACCTCCTGTATTTTCTACTGTAATAATGTAATTTAAG	17	2	12	246	BZW1
chr2	+	202278154	202278184	G5731.1	ATCTGACTCATTCGTCACTACCACTGAGACA	113	4	6	683
chr2	+	202291398	202291418	G5732.1	TCACTACCTCATCTGATGCCA	157	2	2	940
chr2	+	202293095	202293137	G5734.1	ATAATGAAGGCATCTTTAGTCACTACCTCTTCTGAGACACTTG	943	10	44	9453	NOP58
chr2	+	206161882	206161922	G5735.1	TTGCATGATGAATAAAATCAAATCACCATCTTTCGGCTGAG	23	2	4	248
chr2	+	206161923	206161950	G5735.2	TTCGTGATGGATTTGCTTTTTTCTGATT	101	6	6	1531
chr2	+	215334917	215334942	G5737.1	AGGGGCTGATAGGATGTCTTCATTTG	13	3	15	102	ATIC
chr2	+	216141197	216141240	G5740.1	AATGCTGTTGATGCTTTGATTGACTCCATGAGCTTGGCAAAGAA	24	3	11	199	XRCC5
chr2	+	216148188	216148223	G5741.1	ATTCCTCTCTCTAAAATAAAGACCCTTTTTCCTCTG	12	3	4	157	XRCC5
chr2	+	218402657	218402678	G5751.1	TTCAAGTAATTCAGGATAGGTT	35	3	4	272
chr2	+	233275727	233275762	G5764.1	GGTCGATGATGATTGGTAAAAGGTCTGATTGCACTG	33	3	5	283
chr2	+	241442105	241442129	G5787.1	ATGCAGCGCCTGCTGGGTCCTTCTG	12	2	24	60	FARP2
chr2	+	241573653	241573683	G5790.1	AATGTTGCATGAGTCGGATCCCAGTCCATTG	14	2	4	122	BOK
chr2	-	10791820	10791840	G5801.1	TTTGGATGGTTGAGTTCTATG	21	2	3	177	PDIA6
chr2	-	22338886	22338911	G5807.1	CCTGGGAATACCAGGTGCTGTAGGCT	45	2	2	261
chr2	-	27662184	27662208	G5818.1	AAGAGACATATGGACAATGAATCTG	14	2	6	46	SUPT7L
chr2	-	47160668	47160715	G5822.1	TTTGTAACTTATCTGTAAAAGGTTTCTCCCTACTGTCAAAAAAATATG	14	3	15	236	CALM2
chr2	-	47280760	47280792	G5825.1	TTTCCGTAGTGTAGTGGTTATCACGTTCGCCTG	140	5	13	1788	AC106869.1
chr2	-	48790279	48790297	G5830.1	TGACTCTAGAAAGTGGTTA	115	2	220	465
chr2	-	64875976	64876006	G5844.1	CCCAGAAAAGGTGTTGGTTGATATGGACAGC	200	3	4	1394
chr2	-	70249007	70249043	G5850.1	TATCATGCAAGATTCCCATTCTTGCGACCCGGGTTCG	79	4	4	849
chr2	-	70465674	70465715	G5851.1	CAGTGGTGTCCCATTTTAATGACTGCCCAGATTCCCACACTC	13	2	7	123	TGFA
chr2	-	74365942	74365976	G5859.1	ATCACAGATGCTGAAGGCCTGGGTTTGAAGCTCGA	34	2	6	248	DCTN1
chr2	-	76445300	76445355	G5875.1	ATTCGGCTGATCTGGCTGGCTAGGCGGGTGTCCCCTTCCTCCCTCACCGCTCCATG	280	8	9	2589
chr2	-	94899164	94899198	G5888.1	ACGTTAGGTCAAGGTGTAGCCCATGAGGTGGCAAG	161	2	2	1101	AC097374.1
chr2	-	96286815	96286858	G5903.1	CTTTTTGGATTCTGGTGGAGGATGTGGACAGCGAGGTGATTCTG	16	3	7	138	SNRNP200
chr2	-	96287445	96287484	G5904.1	AATTTCCCCTTTGAGCGTCTGTACGACCTGAATCATAATG	16	2	2	103	SNRNP200
chr2	-	106697786	106697815	G5912.1	CTCTTCCTGGGGACAATGTGGGCTTCAATG	20	2	2	168
chr2	-	106698596	106698627	G5915.1	ATTCGGGCAAGTCCACCACTACTGGCCATCTG	28	2	3	160
chr2	-	110085718	110085750	G5919.1	CCTTCATCGCCACGCTGCTCTACATTCTCCATG	12	3	5	115	MALL
chr2	-	127798967	127798998	G5933.1	GGCTGGTCCGATGGTAGTGGGTTATCAGAACT	201	2	2	1658
chr2	-	128445079	128445103	G5935.1	GGGAATACTGGGTGCTGTAGGCTTT	153	6	8	1199
chr2	-	132254662	132254700	G5944.1	ATGTCCAGGGCTGCACGCGCGCTACACTGACTGGCTCAG	293	3	4	1340	ANKRD30BL
chr2	-	132255145	132255204	G5949.1	CCAAGAATGTTTTCATTAATCAAGAACGAAAGTCGGAGGTTCGAAGACGATCAGATACCG	12071	12	107	82369	ANKRD30BL
chr2	-	132255272	132255327	G5950.1	GTTCTATTTTGTTGGTTTTCGGAACTGAGGCCATGATTAAGAGGGACGGCCGGGGG	7612	15	122	75741	ANKRD30BL
chr2	-	132278689	132278739	G5954.1	CACGTTCGTGGGGAACCTGGTGCTAAACCATTTGTAGACGACCTGCTTCTG	111	5	38	595
chr2	-	132279144	132279168	G5955.1	TTGGATTGTTCACCCACTAATAGGG	37089	8	578	295792
chr2	-	132279344	132279384	G5957.1	TGGAGCAGAAGGGCAAAAGCTCGCTTGATCGTGATTTTCAG	890	6	7	3331
chr2	-	132279395	132279431	G5958.1	TAATGCAGGTGTCCTAAGGAGAGCTCAGGGAGGACAG	54	3	29	240
chr2	-	132279454	132279475	G5959.1	ACAGTGCCAGGTGGGGAGTTTG	614	2	2	3041
chr2	-	132279561	132279592	G5960.1	ACTACTCTGATCGTTTTTTCACTGACCTGGTG	35	2	2	379
chr2	-	132279917	132279940	G5964.1	TGCCCAGTGCTCTGAATGTCAAAA	346	4	12	2057
chr2	-	132280610	132280639	G5965.1	GGCATGTTGGAACAATGTAGGTAAAGGAAG	420	4	5	2372
chr2	-	132281063	132281117	G5968.1	CAAATGAGAACTTTGAAGGCCGAAGTGGAGAAGGGTTCCATGTGAACAGCAGTTG	91814	8	762	686164
chr2	-	132281430	132281478	G5969.1	ACCTCAGAAAAGGTGTTGGTTGATATAGACAGCAGGATGGTGGCCATGG	1742	11	116	13551
chr2	-	148881728	148881748	G5980.1	TTCACCCTCTAAATCACCACG	1412	5	15	7044	AC105402.3
chr2	-	148881771	148881820	G5981.1	AATAGGTTTGGTCCTAGCCTTTCTATTAGCTCTTAGTAAGATTACACATG	363	11	16	5574	AC105402.3
chr2	-	156401185	156401217	G5983.1	GCATTGGTGGTTCAGTGGTAGAATTCTCGCCTG	342	7	10	3752	VAC14
chr2	-	158584222	158584247	G5985.1	AAGCTGCCATCTGTGGGATTATGACT	30	2	2	219
chr2	-	176201201	176201236	G5991.1	AGCTCGCCTGCATCTACTCGGCCCTCATTCTGCACG	231	3	9	1826
chr2	-	189930726	189930749	G5997.1	ATCTGGGAGTGTGTGATCTGTATG	12	2	14	94
chr2	-	190537988	190538021	G5999.1	TGATGTGTTGTTGCCATGGTAATCCTGCTCAGTA	6988	11	133	71668
chr2	-	197402794	197402822	G6003.1	CTGGTCTGGCTACTATGATCTCTACCATG	37	2	14	340	SF3B1
chr2	-	197489024	197489060	G6005.1	AAAAGGAAAAACTGAATGAACGGCTTGCAAAACTTTC	23	2	3	130	HSPD1
chr2	-	197498764	197498793	G6009.1	CTCCTCATCTCACTCGGGCTTATGCCAAAG	31	2	3	245	HSPD1
chr2	-	199783341	199783373	G6010.1	ATACAACCCCCCACTGCTAAATTTGACTGGCTT	36	2	3	311	FTCDNL1
chr2	-	202346308	202346373	G6011.1	TAAGGCGAGCTCAGGGAGGACAGAAACCTCCCGTGGAGCAGAAGGGCAAAAGCTCGCTTGATGTTG	2221	4	9	5935
chr2	-	205993789	205993809	G6014.1	AAACACTGTATGTATTATCTG	10	2	10	70	INO80D
chr2	-	205995855	205995883	G6015.1	AATTCTGTAACTAACTCATTTTTCTCATG	11	2	12	131	INO80D
chr2	-	207762627	207762657	G6016.1	TTCCCAATTAATGTAGATAAATTTTAAAATG	10	3	10	110	FZD5
chr2	-	218264510	218264544	G6018.1	CCTGACCGTTAATGGCTGCAGCCCCTGCCTGTGTG	16	2	4	94	AAMP
chr2	-	218265390	218265432	G6019.1	ATGGGACCTTGGCCATCTATGACCTGGCTACGCAGACTCTTAG	14	2	4	150	AAMP
chr2	-	218269490	218269531	G6020.1	ACCTGGCCCAGGAGATGGAAGATGTGGACTTTGAGGAAGAAG	17	2	2	107	AAMP
chr2	-	219539205	219539257	G6026.1	GTCCCCTCTCTGGCTCTGTGGGTCCCTGGGCTCTGGACAAGCACTGGGGGACG	39	3	4	303	CHPF
chr2	-	219540420	219540449	G6034.1	ATGTGGCCGATGTTCTGGGGACAGCTCTAG	43	2	2	286	CHPF
chr2	-	229180769	229180795	G6053.1	AATCCGGAGTGGCGGAGATGGGCGTAG	294	2	19	802	PID1
chr2	-	229180855	229180914	G6054.1	AACAGCAGTTGAACACGGGTCAGTCGGTCCTGAGAGATGGGCGAGCGCCGTTCCGAAGGG	80489	9	643	459301	PID1
chr2	-	229180936	229180971	G6055.1	CCCCGAGAGAGGGGCCCGTGCCTTGGAAAGCGTCGC	2517	3	8	7644	PID1
chr2	-	231455513	231455538	G6058.1	TTACCTTGGACTGGGCCAAACCTAAG	43	3	3	246	NCL
chr2	-	231455885	231455905	G6060.1	GTGGCAGTTTATGGATTCGCA	89	2	28	78
chr2	-	231460377	231460404	G6068.1	AAACCTGATGTTACATTGTAGTGTGCTG	17	2	7	115
chr2	-	231461972	231461990	G6073.1	AAGGCTGCTGCAACCTCAG	23	2	2	67	NCL
chr2	-	241675869	241675896	G6102.1	CCCTCTCCCCTGTCCTGATGGCACTCTG	11	2	2	86	DTYMK
chr20	+	2654230	2654254	G6113.1	AATCAAATCTGTCAATCCCCTGAGT	107	2	2	721
chr20	+	2654256	2654287	G6113.2	CAATCACTGATGTCTCCATGTCTCTGAGCAAT	219	5	11	1975
chr20	+	2656939	2656970	G6117.1	TGGAGGTGATGAACTGTCTGAGCCTGACCTTG	622	7	9	5395
chr20	+	2656971	2657010	G6117.2	TAGAATGGAGGCAAAAAAACTGATTTAATGAGCCTGATCC	521	6	16	4116
chr20	+	4701525	4701557	G6134.1	TTATATAAAAAAATTGTAAATGTTTAATATCTG	17	5	16	221	PRNP
chr20	+	7718467	7718510	G6135.1	TCATGTAAATAATTTCCATATTTCTCTTTTATAATAAACTAATG	16	4	17	278	HSPE1
chr20	+	10823977	10823996	G6137.1	TCCTATTGTGTTGGCCTTTG	413	3	412	3507	AL050403.2
chr20	+	17489110	17489133	G6140.1	AGTGCACGTGTTAGGACCTGAAAG	11	2	11	44
chr20	+	18011959	18012008	G6141.1	TCAGACGCAGCCGTAGACACCAGCTCCGAAATCACCACCAAGGACTTAAA	20	3	3	77
chr20	+	25280964	25280992	G6151.1	TTTCCCGGCGATGTGGACCGCCTGCGCAG	10	2	3	57	PYGB
chr20	+	38578636	38578656	G6184.1	TATTTTCTGTAAATATTTCTG	29	4	17	297	RALGAPB
chr20	+	41028820	41028861	G6187.1	CCCAAATGCGAACTTAGGCTGTTACACAACTGCTGGGGTCTG	19	2	6	149	TOP1
chr20	+	49278945	49278975	G6219.1	TGTAAATGATGACTTCACTTTTTTCCCCATC	59	5	6	720
chr20	+	49278982	49279021	G6219.2	ACAATGCTGACGTCTTATATTTTGCCAGTTAGTTCTGATA	320	11	32	4502
chr20	+	49280324	49280402	G6221.1	CATATATGATGACTTAGCTTTTTTCCCCGACAGATCGACTATGTTGATCTAACTTTTCTAAGCCAGTTTCTGTCTGATA	560	14	37	7296
chr20	+	49280721	49280765	G6223.1	ATCGACCCTGTTGATCTCTACACTATTGGCCAGTTTTGTCTGATG	532	9	22	6059
chr20	+	58910705	58910752	G6237.1	ATGGGCGTCACTACTGCTACCCTCATTTCACCTGCGCTGTGGACACTG	16	2	2	174	GNAS
chr20	+	62303710	62303773	G6240.1	TACATTCAGCAGACGGACGACTCGCTTATTCACTTCTGCTGGAAGGACAGGACGTCCGGGAACG	29	2	8	186	ADRM1
chr20	-	2461677	2461701	G6278.1	TCCTTTTATCTCCTTGTGGCCTATG	19	3	6	210	SNRPB
chr20	-	2463006	2463035	G6281.1	ATTAATGATGAGATATAACCTTGACTGAAG	42	5	8	362	SNRPB
chr20	-	5115118	5115188	G6291.1	TACCTCTAAGTACATATGTAGATATTGTTTTCTGTAAATAACCTATTTTTTTCTCTATTCTCTGCAATTTG	2052	23	1998	39366	PCNA
chr20	-	6123214	6123234	G6295.1	CAAGAGGAGCTGCAGATACTG	14	2	2	40	FERMT1
chr20	-	9338741	9338758	G6296.1	TGTAGAGGTGAAATTTGT	739	2	728	4445
chr20	-	17962712	17962749	G6302.1	AGACCCATCTCACAAAGATGAGTGGTGAAAATCTGATC	113	3	7	861
chr20	-	29298615	29298660	G6308.1	CCCTTAGATGTCCGGGGCTGCACGTGCGCTACACTGACTGGCTCAG	7222	7	86	36420
chr20	-	29298713	29298735	G6309.1	TCGGTGTCCCCCAACTTCTTAGA	57	2	3	392
chr20	-	29298757	29298804	G6310.1	ATTTGTCTGGTTAATTCCGATAACGAACGAGACTCTGGCATGCTAACT	656	5	7	5810
chr20	-	29299111	29299155	G6313.1	TTTTCATTAACCAAGAACGAAAGTCGGAGGTTCGAAGACGATCAG	5936	4	35	19809
chr20	-	29299247	29299295	G6314.1	ACCGCGGTTCTATTTTGTTGGTTTTTGGAACTGAGGCCATGATTAAGAA	66	5	9	903
chr20	-	29299455	29299491	G6316.1	TTAAAAAGCTCGTAGTTGGATCTTGGGAGCGGGCGGG	1158	5	10	9220
chr20	-	29299541	29299609	G6317.1	CCCTGTAATTGGAATGAGTCCACTTTAAATCCTTTAACGAGGATCCATTGGAGGGCAAGTCTGGTGCCA	628	9	18	7655
chr20	-	29299713	29299731	G6318.1	ATTCTGGAGAGGGAGCCTG	65	2	2	257
chr20	-	29299980	29300011	G6319.1	AAAACTGTGGTAATTCTAGAGCTAATACATGC	13530	9	209	106696
chr20	-	29741561	29741592	G6321.1	AATTGCAGGACACATTGATCATCCATACTTCG	62	4	11	334
chr20	-	30484966	30485002	G6322.1	CAGGACACATTGATCATTGACACTTCGAATGCACTTG	288	8	131	2208
chr20	-	30487059	30487113	G6330.1	GACTGCGGTTCTATTTTGTTGGTTTCCGGAACTGAGGCCATGATTAAGAGGGATG	166	5	15	1410
chr20	-	30487417	30487468	G6331.1	GGAGGTAGTGACGAAAAATAACAATACAGGACTCTTTCGAGGCCCTGTAATT	4269	7	35	33863
chr20	-	30511954	30511975	G6336.1	CCTCTAAGTCAGAATCCCGCCC	482	3	4	1919
chr20	-	30512061	30512090	G6337.1	GTGTGTTGTTGCCATGGTAATCCTGCTCAG	1793	8	38	16839
chr20	-	30512147	30512169	G6338.1	TTGGATTGTTCACCCACTAATGG	2172	7	47	17291
chr20	-	30512399	30512426	G6340.1	TGTCCTAAGGCGAGCTCAGGGAGGACAG	1278	3	5	2931
chr20	-	30512458	30512479	G6341.1	ACAGTGCCAGGTGGGGAGTTTG	634	5	5	3135
chr20	-	30512801	30512835	G6343.1	TGACGTGCATGAATGGATGAATGAGATTCCCACTG	19	3	10	127
chr20	-	30513582	30513647	G6347.1	CTCTGGCATGTTGGAACAATGTAGGTAAGGGAAGTCAGCAAGCCGGATCCGTAACTTCGGGATAAG	31359	14	283	149633
chr20	-	30514072	30514114	G6348.1	AGAGCTTTGAAGGCCGAAGTGGAGAAGGGTTCCATGTGAACAG	682	7	17	4944
chr20	-	30514115	30514142	G6348.2	CTTGGTGGTAGTAGCAAATTTTCAAACG	98	2	6	699
chr20	-	30514431	30514479	G6349.1	ATCCCAGAAAAGGTGTTGGTTGATATAGACAGCTGGACGGTGGCCATGG	670	10	89	5875
chr20	-	30744552	30744591	G6351.1	ACGTTAGGTCAAGGTGTAGCCCATGAGGTGGCAAGAAATG	148	3	3	1028
chr20	-	31664748	31664784	G6352.1	CCACCCCGGGCTCTCTGCTGTACATATTTGAGACTAG	20	2	6	176	BCL2L1
chr20	-	34291509	34291535	G6364.1	TTAGGCATCCGAGGCATCTCTGAGGAG	22	2	44	88	AHCY
chr20	-	36047644	36047686	G6378.1	TGTATATAGTGTATATAAGCGGACATAGGAGTCCTAATTTACG	38	4	25	333	NORAD
chr20	-	37975223	37975247	G6381.1	CTCAAGGTCCATTTGTAGGAGAACG	42	2	2	239
chr20	-	38433862	38433899	G6388.1	CTCCTGTCCCTTTCAAACTCTGGAGCTTTCTCACACCT	121	7	9	1525	SNHG17
chr20	-	49634252	49634296	G6407.1	GGTTAGGGCTTTTTTCGTTGCATGTGATGGTTCTGTGGACATATG	10	2	10	156	B4GALT5
chr20	-	49643585	49643611	G6408.1	ATTACATTCATGAACTCTTCTCCAAAG	14	3	3	123	B4GALT5
chr20	-	50143579	50143604	G6412.1	TGGTGCTCTGTGATCCTGTGCTTCAG	14	2	2	138	TMEM189
chr20	-	54153477	54153505	G6414.1	ATTTCATCTGTATACCTTCAAATTCTCTG	31	6	20	383	CYP24A1
chr20	-	54153663	54153681	G6415.1	CATACTGTATATAATTCTG	18	3	11	133	CYP24A1
chr20	-	57360310	57360344	G6416.1	ACGTTAGGTCAAGGTGTAGCCCATGAGGTGGCAAG	151	3	3	1040	AC097374.1
chr20	-	62139083	62139116	G6419.1	CTCTATCAGACTGACCCCTCGGGCACATACCATG	12	2	3	81	PSMA7
chr20	-	63565183	63565227	G6442.1	AGGCACGAGCTGGCGTTTGTGTGCCGCATGGACACGTGGGACCCG	23	3	3	121	HELZ2
chr21	+	8196246	8196287	G6448.1	CCAATGGGGTGAAGCTACCATCTGTGGGATTATGACTGAACG	488	7	11	4611
chr21	+	8206412	8206459	G6449.1	CTTCGTGATCGATGTGGTGACGTCGTGCTCTCCCGGGCCGGGTCCGAG	46	7	9	465	FP671120.1
chr21	+	8206637	8206679	G6451.1	CGGGCCGGCGGGGTCCTCTGACGCGGCAGACAGCCCTCGCTGT	29	2	2	143	FP671120.1
chr21	+	8207447	8207481	G6453.1	ATCCCCCGGGCCGCCGCCTCTGTCTCTGCCTCCGT	52	3	3	330	FP671120.1
chr21	+	8209631	8209830	G6457.1	TACCTGGTTGATCCTGCCAGTAGCATATGCTTGTCTCAAAGATTAAGCCATGCATGTCTAAGTACGCACGGCCGGTACAGTGAAACTGCGAATGGCTCATTAAATCAGTTATGGTTCCTTTGGTCGCTCGCTCCTCTCCTACTTGGATAACTGTGGTAATTCTAGAGCTAATACATGCCGACGGGCGCTGACCCCCTTCG	40641	51	2143	507679	FP671120.1
chr21	+	8209831	8209855	G6457.2	CGGGGGGGATGCGTGCATTTATCAG	201	2	4	1124	FP671120.1
chr21	+	8209911	8210129	G6457.3	CGGCTTTGGTGACTCTAGATAACCTCGGGCCGATCGCACGCCCCCCGTGGCGGCGACGACCCATTCGAACGTCTGCCCTATCAACTTTCGATGGTAGTCGCCGTGCCTACCATGGTGACCACGGGTGACGGGGAATCAGGGTTCGATTCCGGAGAGGGAGCCTGAGAAACGGCTACCACATCCAAGGAAGGCAGCAGGCGCGCAAATTACCCACTCCCG	47312	38	1015	241206	FP671120.1
chr21	+	8210130	8210276	G6457.4	ACCCGGGGAGGTAGTGACGAAAAATAACAATACAGGACTCTTTCGAGGCCCTGTAATTGGAATGAGTCCACTTTAAATCCTTTAACGAGGATCCATTGGAGGGCAAGTCTGGTGCCAGCAGCCGCGGTAATTCCAGCTCCAATAGCG	3753	17	98	23671	FP671120.1
chr21	+	8210277	8210344	G6457.5	TATATTAAAGTTGCTGCAGTTAAAAAGCTCGTAGTTGGATCTTGGGAGCGGGCGGGCGGTCCGCCGCG	16797	13	567	139561	FP671120.1
chr21	+	8210352	8210402	G6457.6	CCACCGCCCGTCCCCGCCCCTTGCCTCTCGGCGCCCCCTCGATGCTCTTAG	810	9	41	5569	FP671120.1
chr21	+	8210403	8210447	G6457.7	CTGAGTGTCCCGCGGGGCCCGAAGCGTTTACTTTGAAAAAATTAG	1414	10	51	12363	FP671120.1
chr21	+	8210448	8211193	G6457.8	AGTGTTCAAAGCAGGCCCGAGCCGCCTGGATACCGCAGCTAGGAATAATGGAATAGGACCGCGGTTCTATTTTGTTGGTTTTCGGAACTGAGGCCATGATTAAGAGGGACGGCCGGGGGCATTCGTATTGCGCCGCTAGAGGTGAAATTCTTGGACCGGCGCAAGACGGACCAGAGCGAAAGCATTTGCCAAGAATGTTTTCATTAATCAAGAACGAAAGTCGGAGGTTCGAAGACGATCAGATACCGTCGTAGTTCCGACCATAAACGATGCCGACCGGCGATGCGGCGGCGTTATTCCCATGACCCGCCGGGCAGCTTCCGGGAAACCAAAGTCTTTGGGTTCCGGGGGGAGTATGGTTGCAAAGCTGAAACTTAAAGGAATTGACGGAAGGGCACC…	73446	158	2406	510531
chr21	+	8211194	8211262	G6457.9	CCGGCAGGCGCGGGTAACCCGTTGAACCCCATTCGTGATGGGGATCGGGGATTGCAATTATTCCCCATG	4634	13	71	18293	FP671120.1
chr21	+	8211263	8211479	G6457.10	AACGAGGAATTCCCAGTAAGTGCGGGTCATAAGCTTGCGTTGATTAAGTCCCTGCCCTTTGTACACACCGCCCGTCGCTACTACCGATTGGATGGTTTAGTGAGGCCCTCGGATCGGCCCCGCCGGGGTCGGCCCACGGCCCTGGCGGAGCGCTGAGAAGACGGTCGAACTTGACTATCTAGAGGAAGTAAAAGTCGTAACAAGGTTTCCGTAGGTG	46004	45	1599	322391	FP671120.1
chr21	+	8212564	8212728	G6461.1	CCTCGTACGACTCTTAGCGGTGGATCACTCGGCTCGTGCGTCGATGAAGAACGCAGCTAGCTGCGAGAATTAATGTGAATTGCAGGACACATTGATCATCGACACTTCGAACGCACTTGCGGCCCCGGGTTCCTCCCGGGGCTACGCCTGTCTGAGCGTCGCTTG	188298	36	6801	1731215	FP671120.1
chr21	+	8213881	8213980	G6466.1	TCCGAGACGCGACCTCAGATCAGACGTGGCGACCCGCTGAATTTAAGCATATTAGTCAGCGGAGGAAAAGAAACTAACCAGGATTCCCTCAGTAACGGCG	163320	16	4706	1066958	FP671120.1
chr21	+	8213981	8214121	G6466.2	AGTGAACAGGGAAGAGCCCAGCGCCGAATCCCCGCCCCGCGGCGGGGCGCGGGACATGTGGCGTACGGAAGACCCGCTCCCCGGCGCCGCTCGTGGGGGGCCCAAGTCCTTCTGATCGAGGCCCAGCCCGTGGACGGTGTG	20287	15	545	96834	FP671120.1
chr21	+	8214132	8214181	G6466.3	CGGCCCCCGGCGCGCCGGGCCCGGGTCTTCCCGGAGTCGGGTTGCTTGGG	823	7	24	6362	FP671120.1
chr21	+	8214182	8214233	G6466.4	AATGCAGCCCAAAGCGGGTGGTAAACTCCATCTAAGGCTAAATACCGGCACG	230	3	6	782	FP671120.1
chr21	+	8214289	8214412	G6466.5	AGTTCAAGAGGGCGTGAAACCGTTAAGAGGTAAACGGGTGGGGTCCGCGCAGTCCGCCCGGAGGATTCAACCCGGCGGCGGGTCCGGCCGTGTCGGCGGCCCGGCGGATCTTTCCCGCCCCCCG	17795	15	307	82763	FP671120.1
chr21	+	8214521	8214571	G6466.6	TGGGGTCGGCGGGGGACCGTCCCCCGACCGGCGACCGGCCGCCGCCGGGCG	120	2	2	131	FP671120.1
chr21	+	8214572	8214653	G6466.7	CATTTCCACCGCGGCGGTGCGCCGCGACCGGCTCCGGGACGGCTGGGAAGGCCCGGCGGGGAAGGTGGCTCGGGGGGCCCCG	7427	8	205	41554	FP671120.1
chr21	+	8214812	8214901	G6467.1	CAGCACTCGCCGAATCCCGGGGCCGAGGGAGCGAGACCCGTCGCCGCGCTCTCCCCCCTCCCGGCGCCCACCCCCGCGGGGAATCCCCCG	1927	6	14	5262	FP671120.1
chr21	+	8214936	8215008	G6467.2	TCTCCTCGTGGGGGGGCCGGGCCACCCCTCCCACGGCGCGACCGCTCTCCCACCCCTCCTCCCCGCGCCCCCG	362	5	13	1220	FP671120.1
chr21	+	8215029	8215138	G6467.3	CCGCGCGCGGGTCGGGGGGCGGGGCGGACTGTCCCCAGTGCGCCCCGGGCGGGTCGCGCCGTCGGGCCCGGGGGGAGGTTCTCTCGGGGCCACGCGCGCGTCCCCCGAAG	6652	10	61	15883	FP671120.1
chr21	+	8215152	8215290	G6467.4	AGCGAGCGCACGGGGTCGGCGGCGACGTCGGCTACCCACCCGACCCGTCTTGAAACACGGACCAAGGAGTCTAACACGTGCGCGAGTCGGGGGCTCGCACGAAAGCCGCCGTGGCGCAATGAAGGTGAAGGCCGGCGCG	23684	14	319	88962	FP671120.1
chr21	+	8215291	8216008	G6467.5	CTCGCCGGCCGAGGTGGGATCCCGAGGCCTCTCCAGTCCGCCGAGGGCGCACCACCGGCCCGTCTCGCCCGCCGCGCCGGGGAGGTGGAGCACGAGCGCACGTGTTAGGACCCGAAAGATGGTGAACTATGCCTGGGCAGGGCGAAGCCAGAGGAAACTCTGGTGGAGGTCCGTAGCGGTCCTGACGTGCAAATCGGTCGTCCGACCTGGGTATAGGGGCGAAAGACTAATCGAACCATCTAGTAGCTGGTTCCCTCCGAAGTTTCCCTCAGGATAGCTGGCGCTCTCGCAGACCCGACGCACCCCCGCCACGCAGTTTTATCCGGTAAAGCGAATGATTAGAGGTCTTGGGGCCGAAACGATCTCAACCTATTCTCAAACTTTAAATGGGTAAGAAGC…	318690	118	8849	2441379
chr21	+	8216009	8216048	G6467.6	CGCGCGCGTGTGGTGTGCGTCGGAGGGCGGCGGCGGCGGC	1215	5	16	4297	FP671120.1
chr21	+	8216086	8216347	G6468.1	CCTCCTCCCCTCCTCCCGCCCACGCCCCGCTCCCCGCCCCCGGAGCCCCGCGGACGCTACGCCGCGACGAGTAGGAGGGCCGCTGCGGTGAGCCTTGAAGCCTAGGGCGCGGGCCCGGGTGGAGCCGCCGCAGGTGCAGATCTTGGTGGTAGTAGCAAATATTCAAACGAGAACTTTGAAGGCCGAAGTGGAGAAGGGTTCCATGTGAACAGCAGTTGAACATGGGTCAGTCGGTCCTGAGAGATGGGCGAGCGCCGTTCTG	197342	36	4535	1252866
chr21	+	8216358	8216404	G6468.2	CGATGGCCTCCGTTGCCCTCGGCCGATCGAAAGGGAGTCGGGTTCAG	1987	9	31	9617	FP671120.1
chr21	+	8216405	8216440	G6468.3	ATCCCCGAATCCGGAGTGGCGGAGATGGGCGCCGCG	14048	4	140	42701	FP671120.1
chr21	+	8216441	8216618	G6468.4	AGGCGTCCAGTGCGGTAACGCGACCGATCCCGGAGAAGCCGGCGGGAGCCCCGGGGAGAGTTCTCTTTTCTTTGTGAAGGGCAGGGCGCCCTGGAATGGGTTCGCCCCGAGAGAGGGGCCCGTGCCTTGGAAAGCGTCGCGGTTCCGGCGGCGTCCGGTGAGCTCTCGCTGGCCCTTG	39701	28	1241	317230	FP671120.1
chr21	+	8216619	8216815	G6468.5	AAAATCCGGGGGAGAGGGTGTAAATCTCGCGCCGGGCCGTACCCATATCCGCAGCAGGTCTCCAAGGTGAACAGCCTCTGGCATGTTGGAACAATGTAGGTAAGGGAAGTCGGCAAGCCGGATCCGTAACTTCGGGATAAGGATTGGCTCTAAGGGCTGGGTCGGTCGGGCTGGGGCGCGAAGCGGGGCTGGGCGCG	61503	33	1515	426267	FP671120.1
chr21	+	8216906	8216982	G6468.6	GCTCCCTCCCCACCCCGCGCCCTCTCTCTCTCTCTCTCCCCCGCTCCCCGTCCTCCCCCCTCCCCGGGGGAGCGCCG	510	10	48	3185	FP671120.1
chr21	+	8217127	8217173	G6468.7	AGCCGGGCCCTTCCCGTGGATCGCCCCAGCTGCGGCGGGCGTCGCGG	266	2	3	678	FP671120.1
chr21	+	8217226	8217248	G6469.1	TCTCGTCGCGCGCGCGTCCGCTG	110	3	6	393	FP671120.1
chr21	+	8217277	8217304	G6469.2	TCGGCGGGCGGCGGGGCGGGGCGGTTCG	660	2	7	1132	FP671120.1
chr21	+	8217331	8217373	G6470.1	GTCCGCCCCCCGTTCCCCCCTCCTCCTCGGCGCGCGGCGGCGG	65	3	3	239	FP671120.1
chr21	+	8217384	8217420	G6470.2	CGGAGGGGCCGCGGGCCGGTCCCCCCCGCCGGGTCCG	409	2	10	686	FP671120.1
chr21	+	8217421	8217440	G6470.3	CCCCCGGGGCCGCGGTTCCG	1779	2	11	3540	FP671120.1
chr21	+	8217493	8217597	G6470.4	ACCAGGGGAATCCGACTGTTTAATTAAAACAAAGCATCGCGAAGGCCCGCGGCGGGTGTTGACGCGATGTGATTTCTGCCCAGTGCTCTGAATGTCAAAGTGAAG	351169	23	18118	3802977	FP671120.1
chr21	+	8217616	8217729	G6470.5	GTAAACGGCGGGAGTAACTATGACTCTCTTAAGGTAGCCAAATGCCTCGTCATCTAATTAGTGACGCGCATGAATGGATGAACGAGATTCCCACTGTCCCTACCTACTATCCAG	41537	20	619	197386	FP671120.1
chr21	+	8217747	8217839	G6470.6	GAACGGGCTTGGCGGAATCAGCGGGGAAAGAAGACCCTGTTGAGCTTGACTCTAGTCTGGCACGGTGAAGAGACATGAGAGGTGTAGAATAAG	35181	17	767	151603	FP671120.1
chr21	+	8217875	8217976	G6470.7	AGGGGCCCGGGGCGGGGTCCGCCGGCCCTGCGGGCCGCCGGTGAAATACCACTACTCTGATCGTTTTTTCACTGACCCGGTGAGGCGGGGGGGCGAGCCCCG	5710	15	301	52349	FP671120.1
chr21	+	8217977	8218013	G6470.8	AGGGGCTCTCGCTTCTGGCGCCAAGCGCCCGGCCGCG	33020	5	611	161568	FP671120.1
chr21	+	8218015	8218063	G6470.9	GCCGGCCGGGCGCGACCCGCTCCGGGGACAGTGCCAGGTGGGGAGTTTG	4429	6	75	19915	FP671120.1
chr21	+	8218082	8218690	G6470.10	TCAAACGGTAACGCAGGTGTCCTAAGGCGAGCTCAGGGAGGACAGAAACCTCCCGTGGAGCAGAAGGGCAAAAGCTCGCTTGATCTTGATTTTCAGTACGAATACAGACCGTGAAAGCGGGGCCTCACGATCCTTCTGACCTTTTGGGTTTTAAGCAGGAGGTGTCAGAAAAGTTACCACAGGGATAACTGGCTTGTGGCGGCCAAGCGTTCATAGCGACGTCGCTTTTTGATCCTTCGATGTCGGCTCTTCCTATCATTGTGAAGCAGAATTCACCAAGCGTTGGATTGTTCACCCACTAATAGGGAACGTGAGCTGGGTTTAGACCGTCGTGAGACAGGTTAGTTTTACCCTACTGATGATGTGTTGTTGCCATGGTAATCCTGCTCAGTACGAGAG…	615363	138	19179	2733869
chr21	+	8218723	8218778	G6470.11	CCGGGACCGGGGTCCGGTGCGGAGTGCCCTTCGTCCTGGGAAACGGGGCGCGGCTG	2182	5	19	7079	FP671120.1
chr21	+	8218785	8218940	G6470.12	CGGCCGCCCCCTCGCCCGTCACGCACCGCACGTTCGTGGGGAACCTGGCGCTAAACCATTCGTAGACGACCTGCTTCTGGGTCGGGGTTTCGTACGTAGCAGAGCAGCTCCCTCGCTGCGATCTATTGAAAGTCAGCCCTCGACACAAGGGTTTGT	30953	30	1294	242334	FP671120.1
chr21	+	8250621	8250668	G6471.1	CTTCGTGATCGATGTGGTGACGTCGTGCTCTCCCGGGCCGGGTCCGAG	58	8	16	588	FP671120.1
chr21	+	8251656	8251689	G6475.1	ATCCCCCGGGCCGCCGCCTCTGTCTCTGCCTCCG	64	3	5	398
chr21	+	8253842	8253897	G6480.1	TACCTGGTTGATCCTGCCAGTAGCATATGCTTGTCTCAAAGATTAAGCCATGCATG	307	10	16	3000
chr21	+	8253931	8254063	G6480.2	AATGGCTCATTAAATCAGTTATGGTTCCTTTGGTCGCTCGCTCCTCTCCTACTTGGATAACTGTGGTAATTCTAGAGCTAATACATGCCGACGGGCGCTGACCCCCTTCGCGGGGGGGATGCGTGCATTTATC	38398	36	1942	491656
chr21	+	8254121	8254306	G6481.1	CGGCTTTGGTGACTCTAGATAACCTCGGGCCGATCGCACGCCCCCCGTGGCGGCGACGACCCATTCGAACGTCTGCCCTATCAACTTTCGATGGTAGTCGCCGTGCCTACCATGGTGACCACGGGTGACGGGGAATCAGGGTTCGATTCCGGAGAGGGAGCCTGAGAAACGGCTACCACATCCAAG	46000	34	974	235882
chr21	+	8254340	8254384	G6482.1	ACCCGGGGAGGTAGTGACGAAAAATAACAATACAGGACTCTTTCA	1018	7	13	4072
chr21	+	8254404	8254552	G6483.1	TCCACTTTAAATCCTTTAACGAGGATCCATTGGAGGGCAAGTCTGGTGCCAGCAGCCGCGGTAATTCCAGCTCCAATAGCGTATATTAAAGTTGCTGCAGTTAAAAAGCTCGTAGTTGGATCTTGGGAGCGGGCGGGCGGTCCGCCGCG	17453	24	580	144011
chr21	+	8254558	8254610	G6483.2	AGCCACCGCCCGTCCCCGCCCCTTGCCTCTCGGCGCCCCCTCGATGCTCTTAG	842	9	69	5740	FP236383.1
chr21	+	8254611	8254655	G6483.3	CTGAGTGTCCCGCGGGGCCCGAAGCGTTTACTTTGAAAAAATTAG	1512	8	65	13067	FP671120.1
chr21	+	8254656	8255260	G6483.4	AGTGTTCAAAGCAGGCCCGAGCCGCCTGGATACCGCAGCTAGGAATAATGGAATAGGACCGCGGTTCTATTTTGTTGGTTTTCGGAACTGAGGCCATGATTAAGAGGGACGGCCGGGGGCATTCGTATTGCGCCGCTAGAGGTGAAATTCTTGGACCGGCGCAAGACGGACCAGAGCGAAAGCATTTGCCAAGAATGTTTTCATTAATCAAGAACGAAAGTCGGAGGTTCGAAGACGATCAGATACCGTCGTAGTTCCGACCATAAACGATGCCGACCGGCGATGCGGCGGCGTTATTCCCATGACCCGCCGGGCAGCTTCCGGGAAACCAAAGTCTTTGGGTTCCGGGGGGAGTATGGTTGCAAAGCTGAAACTTAAAGGAATTGACGGAAGGGCACC…	44421	128	1563	333380
chr21	+	8255279	8255406	G6483.5	CTTCTTAGAGGGACAAGTGGCGTTCAGCCACCCGAGATTGAGCAATAACAGGTCTGTGATGCCCTTAGATGTCCGGGGCTGCACGCGCGCTACACTGACTGGCTCAGCGTGTGCCTACCCTACGCCGG	27642	24	689	167561
chr21	+	8255423	8255560	G6484.1	TTGAACCCCATTCGTGATGGGGATCGGGGATTGCAATTATTCCCCATGAACGAGGAATTCCCAGTAAGTGCGGGTCATAAGCTTGCGTTGATTAAGTCCCTGCCCTTTGTACACACCGCCCGTCGCTACTACCGATTG	21347	32	498	141419
chr21	+	8255618	8255684	G6485.1	CGCTGAGAAGACGGTCGAACTTGACTATCTAGAGGAAGTAAAAGTCGTAACAAGGTTTCCGTAGGTG	15390	15	639	109321
chr21	+	8256773	8256936	G6488.1	CCTCGTACGACTCTTAGCGGTGGATCACTCGGCTCGTGCGTCGATGAAGAACGCAGCTAGCTGCGAGAATTAATGTGAATTGCAGGACACATTGATCATCGACACTTCGAACGCACTTGCGGCCCCGGGTTCCTCCCGGGGCTACGCCTGTCTGAGCGTCGCTT	188272	38	7008	1731855
chr21	+	8258101	8258171	G6492.1	CTCCGAGACGCGACCTCAGATCAGACGTGGCGACCCGCTGAATTTAAGCATATTAGTCAGCGGAGGAAAAG	127758	12	3837	861187
chr21	+	8258174	8258201	G6492.2	ACTAACCAGGATTCCCTCAGTAACGGCG	273	3	3	860
chr21	+	8258202	8258342	G6492.3	AGTGAACAGGGAAGAGCCCAGCGCCGAATCCCCGCCCCGCGGCGGGGCGCGGGACATGTGGCGTACGGAAGACCCGCTCCCCGGCGCCGCTCGTGGGGGGCCCAAGTCCTTCTGATCGAGGCCCAGCCCGTGGACGGTGTG	20401	16	552	97607	FP671120.1
chr21	+	8258353	8258401	G6492.4	CGGCCCCCGGCGCGCCGGGCCCGGGTCTTCCCGGAGTCGGGTTGCTTGG	828	7	20	6376
chr21	+	8258403	8258509	G6492.5	AATGCAGCCCAAAGCGGGTGGTAAACTCCATCTAAGGCTAAATACCGGCACGAGACCGATAGTCAACAAGTACCGTAAGGGAAAGTTGAAAAGAACTTTGAAGAGAG	8553	10	111	39960
chr21	+	8258512	8258561	G6492.6	TTCAAGAGGGCGTGAAACCGTTAAGAGGTAAACGGGTGGGGTCCGCGCAG	16862	8	273	77594
chr21	+	8258795	8258892	G6494.1	CATTTCCACCGCGGCGGTGCGCCGCGACCGGCTCCGGGACGGCTGGGAAGGCCCGGCGGGGAAGGTGGCTCGGGGGGCCCCGTCCGTCCGTCCGTCCG	7579	9	215	42251
chr21	+	8259044	8259130	G6494.2	CACTCGCCGAATCCCGGGGCCGAGGGAGCGAGACCCGTCGCCGCGCTCTCCCCCCTCCCGGCGCCCACCCCCGCGGGGAATCCCCCG	1915	6	14	5292	FP236383.1
chr21	+	8259135	8259235	G6494.3	GGGGGTCTCCCCCGCGGGGGCGCGCCGGCGTCTCCTCGTGGGGGGGCCGGGCCACCCCTCCCACGGCGCGACCGCTCTCCCACCCCTCCTCCCCGCGCCCC	823	5	17	2122
chr21	+	8259289	8259367	G6495.1	TCCCCAGTGCGCCCCGGGCGGGTCGCGCCGTCGGGCCCGGGGGGAGGTTCTCTCGGGGCCACGCGCGCGTCCCCCGAAG	2032	8	27	6795
chr21	+	8259380	8259519	G6495.2	GAGCGAGCGCACGGGGTCGGCGGCGACGTCGGCTACCCACCCGACCCGTCTTGAAACACGGACCAAGGAGTCTAACACGTGCGCGAGTCGGGGGCTCGCACGAAAGCCGCCGTGGCGCAATGAAGGTGAAGGCCGGCGCG	23378	14	296	88021
chr21	+	8259520	8260237	G6495.3	CTCGCCGGCCGAGGTGGGATCCCGAGGCCTCTCCAGTCCGCCGAGGGCGCACCACCGGCCCGTCTCGCCCGCCGCGCCGGGGAGGTGGAGCACGAGCGCACGTGTTAGGACCCGAAAGATGGTGAACTATGCCTGGGCAGGGCGAAGCCAGAGGAAACTCTGGTGGAGGTCCGTAGCGGTCCTGACGTGCAAATCGGTCGTCCGACCTGGGTATAGGGGCGAAAGACTAATCGAACCATCTAGTAGCTGGTTCCCTCCGAAGTTTCCCTCAGGATAGCTGGCGCTCTCGCAGACCCGACGCACCCCCGCCACGCAGTTTTATCCGGTAAAGCGAATGATTAGAGGTCTTGGGGCCGAAACGATCTCAACCTATTCTCAAACTTTAAATGGGTAAGAAGC…	320366	118	8856	2455785
chr21	+	8260238	8260286	G6495.4	CGCGCGCGTGTGGTGTGCGTCGGAGGGCGGCGGCGGCGGCGGGGGTGTG	1251	6	19	4520
chr21	+	8260336	8260633	G6495.5	ACGCCCCGCTCCCCGCCCCCGGAGCCCCGCGGACGCTACGCCGCGACGAGTAGGAGGGCCGCTGCGGTGAGCCTTGAAGCCTAGGGCGCGGGCCCGGGTGGAGCCGCCGCAGGTGCAGATCTTGGTGGTAGTAGCAAATATTCAAACGAGAACTTTGAAGGCCGAAGTGGAGAAGGGTTCCATGTGAACAGCAGTTGAACATGGGTCAGTCGGTCCTGAGAGATGGGCGAGCGCCGTTCCGAAGGGACGGGCGATGGCCTCCGTTGCCCTCGGCCGATCGAAAGGGAGTCGGGTTCAG	212942	45	5023	1358058
chr21	+	8260634	8260669	G6495.6	ATCCCCGAATCCGGAGTGGCGGAGATGGGCGCCGCG	14228	4	117	43344	FP671120.1
chr21	+	8260670	8260773	G6495.7	AGGCGTCCAGTGCGGTAACGCGACCGATCCCGGAGAAGCCGGCGGGAGCCCCGGGGAGAGTTCTCTTTTCTTTGTGAAGGGCAGGGCGCCCTGGAATGGGTTCG	7002	19	102	29679
chr21	+	8260774	8260847	G6495.8	CCCCGAGAGAGGGGCCCGTGCCTTGGAAAGCGTCGCGGTTCCGGCGGCGTCCGGTGAGCTCTCGCTGGCCCTTG	33236	12	1096	291538
chr21	+	8260848	8260971	G6495.9	AAAATCCGGGGGAGAGGGTGTAAATCTCGCGCCGGGCCGTACCCATATCCGCAGCAGGTCTCCAAGGTGAACAGCCTCTGGCATGTTGGAACAATGTAGGTAAGGGAAGTCGGCAAGCCGGATC	32828	20	793	209772
chr21	+	8379291	8379332	G6496.1	CCAATGGGGTGAAGCTACCATCTGTGGGATTATGACTGAACG	538	9	19	5053
chr21	+	8389459	8389506	G6497.1	CTTCGTGATCGATGTGGTGACGTCGTGCTCTCCCGGGCCGGGTCCGAG	53	7	15	521	FP671120.1
chr21	+	8389631	8389672	G6498.1	CGGACCCCGGCCCGACCTCGCCGTCCCGCCCGCCGCCTTCTG	23	2	2	113	FP236383.1
chr21	+	8389684	8389726	G6499.1	CGGGCCGGCGGGGTCCTCTGACGCGGCAGACAGCCCTCGCTGT	41	2	3	201	FP671120.1
chr21	+	8390494	8390521	G6502.1	ATCCCCCGGGCCGCCGCCTCTGTCTCTG	48	2	2	281	FP236383.1
chr21	+	8392401	8392435	G6504.1	TCGCGGGTCTGTGGCGCGGGGCCCCGGTGGTCGTG	11	3	4	68	FP236383.1
chr21	+	8392672	8392890	G6505.1	GTTGATCCTGCCAGTAGCATATGCTTGTCTCAAAGATTAAGCCATGCATGTCTAAGTACGCACGGCCGGTACAGTGAAACTGCGAATGGCTCATTAAATCAGTTATGGTTCCTTTGGTCGCTCGCTCCTCTCCTACTTGGATAACTGTGGTAATTCTAGAGCTAATACATGCCGACGGGCGCTGACCCCCTTCGCGGGGGGGATGCGTGCATTTATCAG	40994	50	2130	511369	FP236383.1
chr21	+	8392946	8393164	G6505.2	CGGCTTTGGTGACTCTAGATAACCTCGGGCCGATCGCACGCCCCCCGTGGCGGCGACGACCCATTCGAACGTCTGCCCTATCAACTTTCGATGGTAGTCGCCGTGCCTACCATGGTGACCACGGGTGACGGGGAATCAGGGTTCGATTCCGGAGAGGGAGCCTGAGAAACGGCTACCACATCCAAGGAAGGCAGCAGGCGCGCAAATTACCCACTCCCG	47100	38	1002	240478	FP671120.1
chr21	+	8393165	8393379	G6505.3	ACCCGGGGAGGTAGTGACGAAAAATAACAATACAGGACTCTTTCGAGGCCCTGTAATTGGAATGAGTCCACTTTAAATCCTTTAACGAGGATCCATTGGAGGGCAAGTCTGGTGCCAGCAGCCGCGGTAATTCCAGCTCCAATAGCGTATATTAAAGTTGCTGCAGTTAAAAAGCTCGTAGTTGGATCTTGGGAGCGGGCGGGCGGTCCGCCGCG	20812	37	639	166603	FP236383.1
chr21	+	8393385	8393437	G6505.4	AGCCACCGCCCGTCCCCGCCCCTTGCCTCTCGGCGCCCCCTCGATGCTCTTAG	813	7	53	5504	FP236383.1
chr21	+	8393438	8393482	G6506.1	CTGAGTGTCCCGCGGGGCCCGAAGCGTTTACTTTGAAAAAATTAG	1472	10	74	12858	FP671120.1
chr21	+	8393483	8393816	G6506.2	AGTGTTCAAAGCAGGCCCGAGCCGCCTGGATACCGCAGCTAGGAATAATGGAATAGGACCGCGGTTCTATTTTGTTGGTTTTCGGAACTGAGGCCATGATTAAGAGGGACGGCCGGGGGCATTCGTATTGCGCCGCTAGAGGTGAAATTCTTGGACCGGCGCAAGACGGACCAGAGCGAAAGCATTTGCCAAGAATGTTTTCATTAATCAAGAACGAAAGTCGGAGGTTCGAAGACGATCAGATACCGTCGTAGTTCCGACCATAAACGATGCCGACCGGCGATGCGGCGGCGTTATTCCCATGACCCGCCGGGCAGCTTCCGGGAAACCAAAG	24246	61	625	154589
chr21	+	8393817	8394232	G6506.3	TCTTTGGGTTCCGGGGGGAGTATGGTTGCAAAGCTGAAACTTAAAGGAATTGACGGAAGGGCACCACCAGGAGTGGAGCCTGCGGCTTAATTTGACTCAACACGGGAAACCTCACCCGGCCCGGACACGGACAGGATTGACAGATTGATAGCTCTTTCTCGATTCCGTGGGTGGTGGTGCATGGCCGTTCTTAGTTGGTGGAGCGATTTGTCTGGTTAATTCCGATAACGAACGAGACTCTGGCATGCTAACTAGTTACGCGACCCCCGAGCGGTCGGCGTCCCCCAACTTCTTAGAGGGACAAGTGGCGTTCAGCCACCCGAGATTGAGCAATAACAGGTCTGTGATGCCCTTAGATGTCCGGGGCTGCACGCGCGCTACACTGACTGGCTCAGCGTG…	48477	92	1697	350652
chr21	+	8394233	8394514	G6506.4	CAGGCGCGGGTAACCCGTTGAACCCCATTCGTGATGGGGATCGGGGATTGCAATTATTCCCCATGAACGAGGAATTCCCAGTAAGTGCGGGTCATAAGCTTGCGTTGATTAAGTCCCTGCCCTTTGTACACACCGCCCGTCGCTACTACCGATTGGATGGTTTAGTGAGGCCCTCGGATCGGCCCCGCCGGGGTCGGCCCACGGCCCTGGCGGAGCGCTGAGAAGACGGTCGAACTTGACTATCTAGAGGAAGTAAAAGTCGTAACAAGGTTTCCGTAGGTG	49426	54	1689	342340
chr21	+	8395598	8395763	G6511.1	ACCTCGTACGACTCTTAGCGGTGGATCACTCGGCTCGTGCGTCGATGAAGAACGCAGCTAGCTGCGAGAATTAATGTGAATTGCAGGACACATTGATCATCGACACTTCGAACGCACTTGCGGCCCCGGGTTCCTCCCGGGGCTACGCCTGTCTGAGCGTCGCTTG	188740	36	6951	1736201	FP236383.1
chr21	+	8396793	8396817	G6516.1	CCCTCGGCCGCGGCTCTCTCTCCCG	87	3	4	430	FP236383.1
chr21	+	8396906	8397059	G6517.1	CGGCCCGTCCCCCTCCGAGACGCGACCTCAGATCAGACGTGGCGACCCGCTGAATTTAAGCATATTAGTCAGCGGAGGAAAAGAAACTAACCAGGATTCCCTCAGTAACGGCGAGTGAACAGGGAAGAGCCCAGCGCCGAATCCCCGCCCCGCG	165149	19	4804	1068944	FP236383.1
chr21	+	8397060	8397159	G6517.2	GCGGGGCGCGGGACATGTGGCGTACGGAAGACCCGCTCCCCGGCGCCGCTCGTGGGGGGCCCAAGTCCTTCTGATCGAGGCCCAGCCCGTGGACGGTGTG	18026	14	522	93032	FP236383.1
chr21	+	8397170	8397219	G6517.3	CGGCCCCCGGCGCGCCGGGCCCGGGTCTTCCCGGAGTCGGGTTGCTTGGG	851	8	31	6554	FP671120.1
chr21	+	8397339	8397450	G6517.4	CGTGAAACCGTTAAGAGGTAAACGGGTGGGGTCCGCGCAGTCCGCCCGGAGGATTCAACCCGGCGGCGGGTCCGGCCGTGTCGGCGGCCCGGCGGATCTTTCCCGCCCCCCG	17740	14	177	55594	FP236383.1
chr21	+	8397610	8397659	G6518.1	CATTTCCACCGCGGCGGTGCGCCGCGACCGGCTCCGGGACGGCTGGGAAG	7179	6	212	41133	FP236383.1
chr21	+	8397849	8397935	G6519.1	CACTCGCCGAATCCCGGGGCCGAGGGAGCGAGACCCGTCGCCGCGCTCTCCCCCCTCCCGGCGCCCACCCCCGCGGGGAATCCCCCG	1823	4	11	4958	FP236383.1
chr21	+	8397938	8397969	G6519.2	AGGGGGGTCTCCCCCGCGGGGGCGCGCCGGCG	432	2	7	831	FP236383.1
chr21	+	8398063	8398172	G6520.1	CCGCGCGCGGGTCGGGGGGCGGGGCGGACTGTCCCCAGTGCGCCCCGGGCGGGTCGCGCCGTCGGGCCCGGGGGGAGGTTCTCTCGGGGCCACGCGCGCGTCCCCCGAAG	6586	10	64	15599	FP671120.1
chr21	+	8398186	8398237	G6520.2	AGCGAGCGCACGGGGTCGGCGGCGACGTCGGCTACCCACCCGACCCGTCTTG	1979	6	43	8871	FP236383.1
chr21	+	8398238	8398324	G6520.3	AAACACGGACCAAGGAGTCTAACACGTGCGCGAGTCGGGGGCTCGCACGAAAGCCGCCGTGGCGCAATGAAGGTGAAGGCCGGCGCG	21333	8	286	79101	FP236383.1
chr21	+	8398325	8398360	G6520.4	CTCGCCGGCCGAGGTGGGATCCCGAGGCCTCTCCAG	1237	5	24	5266	FP236383.1
chr21	+	8398361	8398398	G6520.5	TCCGCCGAGGGCGCACCACCGGCCCGTCTCGCCCGCCG	3040	3	50	8599	FP236383.1
chr21	+	8398399	8399042	G6520.6	CGCCGGGGAGGTGGAGCACGAGCGCACGTGTTAGGACCCGAAAGATGGTGAACTATGCCTGGGCAGGGCGAAGCCAGAGGAAACTCTGGTGGAGGTCCGTAGCGGTCCTGACGTGCAAATCGGTCGTCCGACCTGGGTATAGGGGCGAAAGACTAATCGAACCATCTAGTAGCTGGTTCCCTCCGAAGTTTCCCTCAGGATAGCTGGCGCTCTCGCAGACCCGACGCACCCCCGCCACGCAGTTTTATCCGGTAAAGCGAATGATTAGAGGTCTTGGGGCCGAAACGATCTCAACCTATTCTCAAACTTTAAATGGGTAAGAAGCCCGGCTCGCTGGCGTGGAGCCGGGCGTGGAATGCGAGTGCCTAGTGGGCCACTTTTGGTAAGCAGAACTGGCGC…	314391	110	8909	2426790
chr21	+	8399043	8399084	G6520.7	CGCGCGCGTGTGGTGTGCGTCGGAGGGCGGCGGCGGCGGCGG	1173	5	18	4048	FP236383.1
chr21	+	8399120	8399438	G6521.1	CCTCCTCCCCTCCTCCCGCCCACGCCCCGCTCCCCGCCCCCGGAGCCCCGCGGACGCTACGCCGCGACGAGTAGGAGGGCCGCTGCGGTGAGCCTTGAAGCCTAGGGCGCGGGCCCGGGTGGAGCCGCCGCAGGTGCAGATCTTGGTGGTAGTAGCAAATATTCAAACGAGAACTTTGAAGGCCGAAGTGGAGAAGGGTTCCATGTGAACAGCAGTTGAACATGGGTCAGTCGGTCCTGAGAGATGGGCGAGCGCCGTTCCGAAGGGACGGGCGATGGCCTCCGTTGCCCTCGGCCGATCGAAAGGGAGTCGGGTTCAG	214118	45	5056	1364380
chr21	+	8399439	8399474	G6521.2	ATCCCCGAATCCGGAGTGGCGGAGATGGGCGCCGCG	14015	4	121	42671	FP671120.1
chr21	+	8399475	8399509	G6521.3	AGGCGTCCAGTGCGGTAACGCGACCGATCCCGGAG	6298	4	77	24585	FP236383.1
chr21	+	8399510	8399863	G6521.4	AAGCCGGCGGGAGCCCCGGGGAGAGTTCTCTTTTCTTTGTGAAGGGCAGGGCGCCCTGGAATGGGTTCGCCCCGAGAGAGGGGCCCGTGCCTTGGAAAGCGTCGCGGTTCCGGCGGCGTCCGGTGAGCTCTCGCTGGCCCTTGAAAATCCGGGGGAGAGGGTGTAAATCTCGCGCCGGGCCGTACCCATATCCGCAGCAGGTCTCCAAGGTGAACAGCCTCTGGCATGTTGGAACAATGTAGGTAAGGGAAGTCGGCAAGCCGGATCCGTAACTTCGGGATAAGGATTGGCTCTAAGGGCTGGGTCGGTCGGGCTGGGGCGCGAAGCGGGGCTGGGCGCGCGCCGCGGCTGGAC	95516	62	2656	724054
chr21	+	8399941	8400016	G6522.1	CTCCCTCCCCGCCCCGCGCCCTCTCTCTCTCTCTCTCCCCCGCTCCCCGTCCTCCCCCCTCCCCGGGGGAGCGCCG	469	10	39	3040	FP236383.1
chr21	+	8400369	8400408	G6525.1	CGCCCCCCGTTCCCCCCTCCTCCTCGGCGCGCGGCGGCGG	63	2	2	166	FP236383.1
chr21	+	8400520	8400632	G6525.2	AACTGGTGCGGACCAGGGGAATCCGACTGTTTAATTAAAACAAAGCATCGCGAAGGCCCGCGGCGGGTGTTGACGCGATGTGATTTCTGCCCAGTGCTCTGAATGTCAAAGTG	469647	25	19318	4056259	FP236383.1
chr21	+	8400655	8400766	G6525.3	TAAACGGCGGGAGTAACTATGACTCTCTTAAGGTAGCCAAATGCCTCGTCATCTAATTAGTGACGCGCATGAATGGATGAACGAGATTCCCACTGTCCCTACCTACTATCCA	41452	20	630	196853	FP236383.1
chr21	+	8400770	8400890	G6525.4	AAACCACAGCCAAGGGAACGGGCTTGGCGGAATCAGCGGGGAAAGAAGACCCTGTTGAGCTTGACTCTAGTCTGGCACGGTGAAGAGACATGAGAGGTGTAGAATAAGTGGGAGGCCCCCG	35237	18	758	155648	FP236383.1
chr21	+	8400925	8401014	G6525.5	CGGGGTCCGCCGGCCCTGCGGGCCGCCGGTGAAATACCACTACTCTGATCGTTTTTTCACTGACCCGGTGAGGCGGGGGGGCGAGCCCCG	5772	16	278	52966	FP236383.1
chr21	+	8401015	8401051	G6525.6	AGGGGCTCTCGCTTCTGGCGCCAAGCGCCCGGCCGCG	33223	5	597	162686	FP671120.1
chr21	+	8401053	8401729	G6525.7	GCCGGCCGGGCGCGACCCGCTCCGGGGACAGTGCCAGGTGGGGAGTTTGACTGGGGCGGTACACCTGTCAAACGGTAACGCAGGTGTCCTAAGGCGAGCTCAGGGAGGACAGAAACCTCCCGTGGAGCAGAAGGGCAAAAGCTCGCTTGATCTTGATTTTCAGTACGAATACAGACCGTGAAAGCGGGGCCTCACGATCCTTCTGACCTTTTGGGTTTTAAGCAGGAGGTGTCAGAAAAGTTACCACAGGGATAACTGGCTTGTGGCGGCCAAGCGTTCATAGCGACGTCGCTTTTTGATCCTTCGATGTCGGCTCTTCCTATCATTGTGAAGCAGAATTCACCAAGCGTTGGATTGTTCACCCACTAATAGGGAACGTGAGCTGGGTTTAGACCGTCG…	612989	146	22601	3743623
chr21	+	8401784	8401818	G6525.8	AGTGCCCTTCGTCCTGGGAAACGGGGCGCGGCCGG	401	4	8	1119	FP236383.1
chr21	+	8401824	8401979	G6525.9	CGGCCGCCCCCTCGCCCGTCACGCACCGCACGTTCGTGGGGAACCTGGCGCTAAACCATTCGTAGACGACCTGCTTCTGGGTCGGGGTTTCGTACGTAGCAGAGCAGCTCCCTCGCTGCGATCTATTGAAAGTCAGCCCTCGACACAAGGGTTTGT	30807	30	1240	241406	FP671120.1
chr21	+	8433646	8433682	G6526.1	CTTCGTGATCGATGTGGTGACGTCGTGCTCTCCCGGG	57	7	14	562
chr21	+	8433818	8433859	G6527.1	CGGACCCCGGCCCGACCTCGCCGTCCCGCCCGCCGCCTTCTG	27	2	2	126	FP236383.1
chr21	+	8434172	8434201	G6530.1	TGTGGGGTTCGAGGCGGTTTGAGTGAGACG	9	2	2	48
chr21	+	8434680	8434707	G6532.1	ATCCCCCGGGCCGCCGCCTCTGTCTCTG	71	3	3	422	FP236383.1
chr21	+	8436876	8436931	G6536.1	TACCTGGTTGATCCTGCCAGTAGCATATGCTTGTCTCAAAGATTAAGCCATGCATG	311	8	10	3104
chr21	+	8436938	8437075	G6537.1	TACGCACGGCCGGTACAGTGAAACTGCGAATGGCTCATTAAATCAGTTATGGTTCCTTTGGTCGCTCGCTCCTCTCCTACTTGGATAACTGTGGTAATTCTAGAGCTAATACATGCCGACGGGCGCTGACCCCCTTCG	40016	38	2084	506767
chr21	+	8437076	8437098	G6537.2	CGGGGGGGATGCGTGCATTTATC	206	2	4	1149
chr21	+	8437155	8437374	G6538.1	GCGGCTTTGGTGACTCTAGATAACCTCGGGCCGATCGCACGCCCCCCGTGGCGGCGACGACCCATTCGAACGTCTGCCCTATCAACTTTCGATGGTAGTCGCCGTGCCTACCATGGTGACCACGGGTGACGGGGAATCAGGGTTCGATTCCGGAGAGGGAGCCTGAGAAACGGCTACCACATCCAAGGAAGGCAGCAGGCGCGCAAATTACCCACTCCCG	47001	38	972	239515
chr21	+	8437375	8437421	G6538.2	ACCCGGGGAGGTAGTGACGAAAAATAACAATACAGGACTCTTTCGAG	3013	8	79	18950
chr21	+	8437425	8437589	G6538.3	CTGTAATTGGAATGAGTCCACTTTAAATCCTTTAACGAGGATCCATTGGAGGGCAAGTCTGGTGCCAGCAGCCGCGGTAATTCCAGCTCCAATAGCGTATATTAAAGTTGCTGCAGTTAAAAAGCTCGTAGTTGGATCTTGGGAGCGGGCGGGCGGTCCGCCGCG	17503	25	623	144927
chr21	+	8437597	8437647	G6538.4	CCACCGCCCGTCCCCGCCCCTTGCCTCTCGGCGCCCCCTCGATGCTCTTAG	800	8	56	5533	FP671120.1
chr21	+	8437648	8437692	G6538.5	CTGAGTGTCCCGCGGGGCCCGAAGCGTTTACTTTGAAAAAATTAG	1483	10	67	12858	FP671120.1
chr21	+	8437693	8438236	G6538.6	AGTGTTCAAAGCAGGCCCGAGCCGCCTGGATACCGCAGCTAGGAATAATGGAATAGGACCGCGGTTCTATTTTGTTGGTTTTCGGAACTGAGGCCATGATTAAGAGGGACGGCCGGGGGCATTCGTATTGCGCCGCTAGAGGTGAAATTCTTGGACCGGCGCAAGACGGACCAGAGCGAAAGCATTTGCCAAGAATGTTTTCATTAATCAAGAACGAAAGTCGGAGGTTCGAAGACGATCAGATACCGTCGTAGTTCCGACCATAAACGATGCCGACCGGCGATGCGGCGGCGTTATTCCCATGACCCGCCGGGCAGCTTCCGGGAAACCAAAGTCTTTGGGTTCCGGGGGGAGTATGGTTGCAAAGCTGAAACTTAAAGGAATTGACGGAAGGGCACC…	40519	113	1517	302664
chr21	+	8438289	8438441	G6538.7	ACCCCCGAGCGGTCGGCGTCCCCCAACTTCTTAGAGGGACAAGTGGCGTTCAGCCACCCGAGATTGAGCAATAACAGGTCTGTGATGCCCTTAGATGTCCGGGGCTGCACGCGCGCTACACTGACTGGCTCAGCGTGTGCCTACCCTACGCCG	30464	29	718	174228
chr21	+	8438443	8438527	G6538.8	CAGGCGCGGGTAACCCGTTGAACCCCATTCGTGATGGGGATCGGGGATTGCAATTATTCCCCATGAACGAGGAATTCCCAGTAAG	3373	13	71	18734
chr21	+	8438550	8438724	G6538.9	ATTAAGTCCCTGCCCTTTGTACACACCGCCCGTCGCTACTACCGATTGGATGGTTTAGTGAGGCCCTCGGATCGGCCCCGCCGGGGTCGGCCCACGGCCCTGGCGGAGCGCTGAGAAGACGGTCGAACTTGACTATCTAGAGGAAGTAAAAGTCGTAACAAGGTTTCCGTAGGTG	45622	33	1566	306095
chr21	+	8439815	8439978	G6541.1	CCTCGTACGACTCTTAGCGGTGGATCACTCGGCTCGTGCGTCGATGAAGAACGCAGCTAGCTGCGAGAATTAATGTGAATTGCAGGACACATTGATCATCGACACTTCGAACGCACTTGCGGCCCCGGGTTCCTCCCGGGGCTACGCCTGTCTGAGCGTCGCTT	188888	37	6972	1737259
chr21	+	8441041	8441097	G6545.1	CCTCTCCCCCTCGCCGGGCCCGTCTCCCGACGGAGCGTCGGGCGGGCGGTCGGGCCG	139	3	3	454
chr21	+	8441139	8441238	G6545.2	TCCGAGACGCGACCTCAGATCAGACGTGGCGACCCGCTGAATTTAAGCATATTAGTCAGCGGAGGAGAAGAAACTAACCAGGATTCCCTCAGTAACGGCG	141110	16	4191	922919
chr21	+	8441239	8441387	G6545.3	AGTGAACAGGGAAGAGCCCAGCGCCGAATCCCCGCCCCGCGGCGGGGCGCGGGACATGTGGCGTACGGAAGACCCGCTCCCCGGCGCCGCTCGTGGGGGGCCCAAGTCCTTCTGATCGAGGCCCAGCCCGTGGACGGTGTGAGGCCGGT	20466	16	549	98173
chr21	+	8441393	8441439	G6545.4	CCCCCGGCGCGCCGGGCCCGGGTCTTCCCGGAGTCGGGTTGCTTGGG	791	8	21	6044
chr21	+	8441440	8441670	G6545.5	AATGCAGCCCAAAGCGGGTGGTAAACTCCATCTAAGGCTAAATACCGGCACGAGACCGATAGTCAACAAGTACCGTAAGGGAAAGTTGAAAAGAACTTTGAAGAGAGAGTTCAAGAGGGCGTGAAACCGTTAAGAGGTAAACGGGTGGGGTCCGCGCAGTCCGCCCGGAGGATTCAACCCGGCGGCGGGTCCGGCCGTGTCGGCGGCCCGGCGGATCTTTCCCGCCCCCCG	24365	28	485	123475
chr21	+	8441830	8441923	G6546.1	CATTTCCACCGCGGCGGTGCGCCGCGACCGGCTCCGGGACGGCTGGGAAGGCCCGGCGGGGAAGGTGGCTCGGGGGGCCCCGTCCGTCCGTCCG	7476	9	219	41797
chr21	+	8442076	8442165	G6546.2	CAGCACTCGCCGAATCCCGGGGCCGAGGGAGCGAGACCCGTCGCCGCGCTCTCCCCCCTCCCGGCGCCCACCCCCGCGGGGAATCCCCCG	1994	5	13	5525	FP671120.1
chr21	+	8442170	8442219	G6546.3	GGGGGTCTCCCCCGCGGGGGCGCGCCGGCGTCTCCTCGTGGGGGGGCCGG	546	3	5	1113
chr21	+	8442231	8442271	G6546.4	CACGGCGCGACCGCTCTCCCACCCCTCCTCCCCGCGCCCCC	281	2	4	745
chr21	+	8442293	8442323	G6547.1	CCGCGCGCGGGTCGGGGGGCGGGGCGGACTG	4600	2	37	9023
chr21	+	8442324	8442401	G6547.2	TCCCCAGTGCGCCCCGGGCGGGTCGCGCCGTCGGGCCCGGGGGAGGTTCTCTCGGGGCCACGCGCGCGTCCCCCGAAG	8878	7	85	20669
chr21	+	8442417	8443271	G6547.3	CGAGCGCACGGGGTCGGCGGCGACGTCGGCTACCCACCCGACCCGTCTTGAAACACGGACCAAGGAGTCTAACACGTGCGCGAGTCGGGGGCTCGCACGAAAGCCGCCGTGGCGCAATGAAGGTGAAGGCCGGCGCGCTCGCCGGCCGAGGTGGGATCCCGAGGCCTCTCCAGTCCGCCGAGGGCGCACCACCGGCCCGTCTCGCCCGCCGCGCCGGGGAGGTGGAGCACGAGCGCACGTGTTAGGACCCGAAAGATGGTGAACTATGCCTGGGCAGGGCGAAGCCAGAGGAAACTCTGGTGGAGGTCCGTAGCGGTCCTGACGTGCAAATCGGTCGTCCGACCTGGGTATAGGGGCGAAAGACTAATCGAACCATCTAGTAGCTGGTTCCCTCCGAAG…	343169	134	9184	2539238
chr21	+	8443274	8443326	G6547.4	CGCGCGTGTGGTGTGCGTCGGAGGGCGGCGGCGGCGGCGGCGGCGGGGGTGTG	1416	6	16	5108
chr21	+	8443355	8443673	G6548.1	CCTCCTCCCCTCCTCCCGCCCACGCCCCGCTCCCCGCCCCCGGAGCCCCGCGGACGCTACGCCGCGACGAGTAGGAGGGCCGCTGCGGTGAGCCTTGAAGCCTAGGGCGCGGGCCCGGGTGGAGCCGCCGCAGGTGCAGATCTTGGTGGTAGTAGCAAATATTCAAACGAGAACTTTGAAGGCCGAAGTGGAGAAGGGTTCCATGTGAACAGCAGTTGAACATGGGTCAGTCGGTCCTGAGAGATGGGCGAGCGCCGTTCCGAAGGGACGGGCGATGGCCTCCGTTGCCCTCGGCCGATCGAAAGGGAGTCGGGTTCAG	211893	46	4882	1349037
chr21	+	8443674	8443709	G6548.2	ATCCCCGAATCCGGAGTGGCGGAGATGGGCGCCGCG	14118	4	130	43009	FP671120.1
chr21	+	8443710	8443850	G6548.3	AGGCGTCCAGTGCGGTAACGCGACCGATCCCGGAGAAGCCGGCGGGAGCCCCGGGGAGAGTTCTCTTTTCTTTGTGAAGGGCAGGGCGCCCTGGAATGGGTTCGCCCCGAGAGAGGGGCCCGTGCCTTGGAAAGCGTCGCG	7692	19	110	32532
chr21	+	8443852	8444099	G6548.4	TTCCGGCGGCGTCCGGTGAGCTCTCGCTGGCCCTTGAAAATCCGGGGGAGAGGGTGTAAATCTCGCGCCGGGCCGTACCCATATCCGCAGCAGGTCTCCAAGGTGAACAGCCTCTGGCATGTTGGAACAATGTAGGTAAGGGAAGTCGGCAAGCCGGATCCGTAACTTCGGGATAAGGATTGGCTCTAAGGGCTGGGTCGGTCGGGCTGGGGCGCGAAGCGGGGCTGGGCGCGCGCCGCGGCTGGACG	93639	43	2650	713361
chr21	+	8444147	8444248	G6549.1	CCCCCGCCCCACCCCGCGCGCGCCGCTCGCTCCCTCCCCGCCCCGCGCCCTCTCTCTCTCTCTCTCCCCCGCTCCCCGTCCTCCCCCCTCCCCGGGGGAGCG	492	11	58	3131
chr21	+	8444547	8444574	G6550.1	TCGGCGGGCGGCGGGGCGGGGCGGTTCG	658	2	5	1161	FP671120.1
chr21	+	8444601	8444643	G6551.1	GTCCGCCCCCCGTTCCCCCCTCCTCCTCGGCGCGCGGCGGCGG	66	2	4	189	FP671120.1
chr21	+	8444768	8444864	G6551.2	GGGAATCCGACTGTTTAATTAAAACAAAGCATCGCGAAGGCCCGCGGCGGGTGTTGACGCGATGTGATTTCTGCCCAGTGCTCTGAATGTCAAAGTG	344763	23	18171	3789502
chr21	+	8444894	8444998	G6551.3	CGGGAGTAACTATGACTCTCTTAAGGTAGCCAAATGCCTCGTCATCTAATTAGTGACGCGCATGAATGGATGAACGAGATTCCCACTGTCCCTACCTACTATCCA	34763	19	547	156289
chr21	+	8445017	8445103	G6551.4	GAACGGGCTTGGCGGAATCAGCGGGGAAAGAAGACCCTGTTGAGCTTGACTCTAGTCTGGCACGGTGAAGAGACATGAGAGGTGTAG	35032	16	769	150142
chr21	+	8445145	8445283	G6551.5	AGGGGCCCGGGGCGGGGTCCGCCGGCCCTGCGGGCCGCCGGTGAAATACCACTACTCTGATCGTTTTTTCACTGACCCGGTGAGGCGGGGGGGCGAGCCCCGAGGGGCTCTCGCTTCTGGCGCCAAGCGCCCGGCCGCG	38090	20	873	210985
chr21	+	8445286	8445333	G6551.6	CCGGCCGGGCGCGACCCGCTCCGGGGACAGTGCCAGGTGGGGAGTTTG	4489	6	77	20085
chr21	+	8445360	8445960	G6551.7	TAACGCAGGTGTCCTAAGGCGAGCTCAGGGAGGACAGAAACCTCCCGTGGAGCAGAAGGGCAAAAGCTCGCTTGATCTTGATTTTCAGTACGAATACAGACCGTGAAAGCGGGGCCTCACGATCCTTCTGACCTTTTGGGTTTTAAGCAGGAGGTGTCAGAAAAGTTACCACAGGGATAACTGGCTTGTGGCGGCCAAGCGTTCATAGCGACGTCGCTTTTTGATCCTTCGATGTCGGCTCTTCCTATCATTGTGAAGCAGAATTCACCAAGCGTTGGATTGTTCACCCACTAATAGGGAACGTGAGCTGGGTTTAGACCGTCGTGAGACAGGTTAGTTTTACCCTACTGATGATGTGTTGTTGCCATGGTAATCCTGCTCAGTACGAGAGGAACCGCA…	276946	137	17716	2396012
chr21	+	8445993	8446210	G6551.8	CCGGGACCGGGGTCCGGTGCGGAGTGCCCTTCGTCCTGGGAAACGGGGCGCGGCTGGAAAGGCGGCCGCCCCCTCGCCCGTCACGCACCGCACGTTCGTGGGGAACCTGGCGCTAAACCATTCGTAGACGACCTGCTTCTGGGTCGGGGTTTCGTACGTAGCAGAGCAGCTCCCTCGCTGCGATCTATTGAAAGTCAGCCCTCGACACAAGGGTTTGT	32918	36	1292	248146
chr21	+	8988172	8988396	G6553.1	TACCTGGTTGATCCTGCCAGTAGCATATGCTTGTCTCAAAGATTAAGCCATGCATGTCTAAGTACGCACGGCCGGTACAGTGAAACTGCGAATGGCTCATTAAATCAGTTATGGTTCCTTTGGTCGCTCGCTCCTCTCCTACTTGGATAACTGTGGTAATTCTAGAGCTAATACATGCCGACGGGCGCTGACCCCCTTCGCGGGGGGGATGCGTGCATTTATCAG	41020	52	2110	513008
chr21	+	8988455	8988670	G6554.1	CTTTGGTGACTCTAGATAACCTCGGGCTGATCGCACGCCCCCCGTGGCGGCGACGACCCATTCGAACGTCTGCCCTATCAACTTTCGATGGTAGTCGCCGTGCCTACCATGGTGACCACGGGTGACGGGGAATCAGGGTTCGATTCCGGAGAGGGAGCCTGAGAAACGGCTACCACATCCAAGGAAGGCAGCAGGCGCGCAAATTACCCACTCCCG	26283	33	546	115618
chr21	+	8988671	8988718	G6554.2	ACCCGGGGAGGTAGTGACGAAAAATAACAATACAGGACTCTTTCGAGG	3143	8	74	19780
chr21	+	16539101	16539121	G6556.1	AACCCGTAGATCCGATCTTGT	18	3	5	102
chr21	+	25573983	25574006	G6559.1	TTAATGCTAATCGTGATAGGGGTT	83	2	11	719	MIR155HG
chr21	+	25855809	25855827	G6560.1	CCACCCGAGATTGAGCAAT	246	3	3	735
chr21	+	33437430	33437456	G6564.1	TAATTAATCTTGTAAATATACTCCTAG	25	2	24	246	IFNGR2
chr21	+	44120696	44120737	G6571.1	CGAGCGGTGAGATCGTCTCTGCAGGGGCGCAGGACTCCTTTG	7	2	3	58	PWP2
chr21	+	46001257	46001287	G6581.1	CAAGTGCGGCCCCATCGACCTCCTGTTCGTG	16	2	2	102	COL6A1
chr21	-	10014877	10014907	G6590.1	AAGAAGCAGCTTCAAACCTGCCGGGGCTTCT	53	3	30	252	AL669831.3
chr21	-	14084998	14085028	G6591.1	AAGCTACCATATGTGGGATTATGACTGAACG	837	7	22	6618
chr21	-	14961759	14961798	G6593.1	CAAGTCTGGACAAATGTATAGAATAAACCTTTTATTTAAG	17	2	19	202	NRIP1
chr21	-	17454827	17454860	G6594.1	TGCATGGGTGGTTCAGTGGTAGAATTCTCGCCTG	1027	8	17	10201
chr21	-	29061516	29061554	G6603.1	TACCCGGAGGTGGAGCAACAGAAATTGAATTAGCCAAAC	17	2	5	97	CCT8
chr21	-	32602272	32602304	G6610.1	CTGTACTATCACAGAAGACAAGAGGAGCTCAAG	39	3	5	169	C21orf59
chr22	+	11629634	11629658	G6622.1	CGAATGGCTCATTAAATCAGTTATG	235	3	6	1120
chr22	+	11629699	11629722	G6623.1	TGGTAATTCTAGAGCTAATGCATG	36	2	4	277
chr22	+	11629930	11629965	G6624.1	TGCCTACCATGGTGACCACGGGTGATGGGGAATCAG	94	3	5	316
chr22	+	11630220	11630255	G6626.1	CTCCTAGTTGGATCTTGGGAGCGGGCGGGCGGTCCG	896	7	15	5384
chr22	+	11630366	11630422	G6628.1	TTCAAAGCAGGTCCGAGCCGCCTGGATACCGCAGCTAGGAATAATGGAATAGGACCG	2579	6	24	11511
chr22	+	11630460	11630505	G6629.1	ATTAAGAGGGACGGCCGGGGGCATTCGTATTGTGCCGCTAGAGGTG	428	6	12	2646
chr22	+	11630599	11630633	G6630.1	ATCAGATACCGTCGTAGTTCCGACCATAAACGATG	363	7	12	2219
chr22	+	11630928	11631002	G6632.1	AATGAGACTCTGGCATGCTAACTAGTTACGTGACCCCCGAGCGGTCGGCGTCCCCCAACTTCTTAGAGGGACAAG	665	7	27	3960
chr22	+	20911141	20911193	G6640.1	CATATTAGTCAGCAGAGGAAAAGAAACTAACCAGGATTCCCTCAGTAATGGCA	178	6	40	760
chr22	+	21856280	21856303	G6646.1	CCTCTAAGTCAGAATCCCGCCCAG	356	3	6	1418
chr22	+	23894430	23894490	G6650.1	CGTGCGTCTGTGCCTCTGCGCGGGTCTCCTGGTCCTTCTGCCATCATGCCGATGTTCATCG	46	4	7	549	MIF
chr22	+	23895042	23895107	G6653.1	TCTACATCAACTATTACGACATGAACGCGGCCAATGTGGGCTGGAACAACTCCACCTTCGCCTAAG	53	4	5	362	AP000350.4
chr22	+	24087572	24087590	G6657.1	CTTCCGTCGGGCCCTGGAG	16	2	3	61	CABIN1
chr22	+	26561201	26561236	G6662.1	CATTTAACCCCCCTGTACACAACTCACTCCTTTTAA	14	6	11	143
chr22	+	29145737	29145780	G6665.1	CCTCTCTGGGCGTGAGCGAGGAAACCAGGCTGCTCTAACTTCTG	10	2	2	98	KREMEN1
chr22	+	37805514	37805547	G6690.1	CGCCTTCAACAGCCGGACCAGACAGGCCACCATG	10	2	2	28	H1F0
chr22	+	37806164	37806206	G6692.1	TCTCCTATTTTCTGTAAATAATTTTCTCCTTTTTTCTCTCTTG	46	6	42	1003	H1F0
chr22	+	37806242	37806263	G6693.1	ACTTTATAAGAGACAGGATTTG	42	3	11	283	H1F0
chr22	+	38706066	38706092	G6705.1	ACTCCACGGCGGCTTTGACTCGGACTG	9	2	8	46	GTPBP1
chr22	+	41622020	41622041	G6727.1	TCATATTACAAAACCGAGGGCG	12	2	2	26	XRCC6
chr22	+	41636571	41636614	G6728.1	TTTCCAAGACATGATGGGCCACGGATCTGACTACTCACTCAGTG	49	2	2	352	XRCC6
chr22	+	42615304	42615347	G6743.1	CTAATGTGAGACGAATTTTTGAGCGGGTAAAGGTCGCCCTCAAG	327	4	8	2224	Z93241.1
chr22	+	46112752	46112773	G6749.1	TGAGGTAGTAGGTTGTATAGTT	55	2	13	475
chr22	+	46113691	46113712	G6750.1	TGAGGTAGTAGGTTGTGTGGTT	101	7	33	866	MIRLET7BHG
chr22	+	50729021	50729048	G6764.1	TGTGGCCTCTTCAGGAAGTTCTGCTCTG	10	2	3	97	SHANK3
chr22	-	11249850	11249881	G6765.1	ACACATTGATCATCGACACTTGAATGCACTTG	34	3	29	190
chr22	-	11251452	11251482	G6767.1	ATAATGAACGAGACTCTGGCATGCCAACTAG	24	3	4	98
chr22	-	11251948	11251983	G6769.1	CGGTTCTATTTTGTTGGTTTTCGGAACTGAGGCCAT	186	3	4	2697
chr22	-	31620651	31620688	G6806.1	CATGGCTCGCTGGATCAAAGAGCTCTTCTGCCATAACG	13	2	2	109	PISD
chr22	-	31716257	31716293	G6807.1	ATGCAGATTGAAGAGGCAGGACAGACAACCCCTGTAG	10	2	3	47	PRR14L
chr22	-	39313821	39313869	G6837.1	CCCGAGACAGACTGCGGAACCGTTCCTTGTTGCCTTCCTTCTGAGAACA	1868	12	86	17219
chr22	-	39313877	39313909	G6837.2	TGTTCAGTGATGAGGCCTGGAATGTGCGCTGGG	1220	8	55	8897
chr22	-	39314689	39314729	G6839.1	CTGGGCAGAAAGGCTACCATCACCGCACTGAGATCAACAAG	16	2	3	66	RPL3
chr22	-	39314732	39314776	G6839.2	TATTGGGGCATGGCATCCTGCTCGTGTAGCCTTCTCTGTGGCACG	116	5	6	1347	RPL3
chr22	-	39315215	39315261	G6840.1	AATCGGACAGTGTAGAACCATTCTCTACTGCCTTCCTTCTGAGAACA	588	12	38	6888
chr22	-	39317513	39317585	G6844.1	ACACCACCCATGGTGGTTGTGGGCATTGTGGGCTACGTGGAAACCCCTCGAGGCCTCCGGACCTTCAAGACTG	45	2	4	272	RPL3
chr22	-	39319052	39319113	G6847.1	CACAGATGATGAACTTATTGACGGGCGGACAGAAACTGTGTGCTGATTGTCACGTTCTGATT	1265	16	50	11009	RPL3
chr22	-	41074617	41074646	G6849.1	AAGCTGTGCTACGTCGCCCTGGACTTCGAG	21	2	2	135
chr22	-	41074715	41074739	G6850.1	CCGGGACCTGACTGACTACCTCATG	59	2	2	271
chr22	-	42160198	42160222	G6858.1	AAATTGTATAATTTTTAAATATCTG	16	3	17	175	TCF20
chr22	-	42870466	42870486	G6868.1	TCTATCTGTATATATTATTTG	11	2	10	122	PACSIN2
chr22	-	49774149	49774180	G6880.1	TTTGTATATTGTTCAAAACTTAACTTATTCTG	56	8	62	757	BRD1
chr22	-	50288778	50288817	G6895.1	ATAAACAAGAGAGTCAAGCGCGACCTGGTACTGTCTGGAG	10	2	4	60	PLXNB2
chr22	-	50290561	50290580	G6898.1	CACTGCAGCTCTGGGCCCTG	16	2	2	62	PLXNB2
chr22_KI270733v1_random	+	112483	112530	G6904.1	CCAATGGGGTGAAGCTACCATCTGTGGGATTATGACTGAACGCCTCTA	505	7	14	4755
chr22_KI270733v1_random	+	122697	122744	G6905.1	CTTCGTGATCGATGTGGTGACGTCGTGCTCTCCCGGGCCGGGTCCGAG	45	8	15	447	FP671120.1
chr22_KI270733v1_random	+	123732	123770	G6910.1	ATCCCCCGGGCCGCCGCCTCTGTCTCTGCCTCCGTTATG	57	4	8	369
chr22_KI270733v1_random	+	125893	126130	G6914.1	TCCGGCCGCGTCGGGGCCTCGCCGCGCTCTACCTTACCTACCTGGTTGATCCTGCCAGTAGCATATGCTTGTCTCAAAGATTAAGCCATGCATGTCTAAGTACGCACGGCCGGTACAGTGAAACTGCGAATGGCTCATTAAATCAGTTATGGTTCCTTTGGTCGCTCGCTCCTCTCCTACTTGGATAACTGTGGTAATTCTAGAGCTAATACATGCCGACGGGCGCTGACCCCCTTCG	40994	51	2140	513682
chr22_KI270733v1_random	+	126131	126155	G6914.2	CGGGGGGGATGCGTGCATTTATCAG	197	4	7	1097	FP671120.1
chr22_KI270733v1_random	+	126211	126644	G6914.3	CGGCTTTGGTGACTCTAGATAACCTCGGGCCGATCGCACGCCCCCCGTGGCGGCGACGACCCATTCGAACGTCTGCCCTATCAACTTTCGATGGTAGTCGCCGTGCCTACCATGGTGACCACGGGTGACGGGGAATCAGGGTTCGATTCCGGAGAGGGAGCCTGAGAAACGGCTACCACATCCAAGGAAGGCAGCAGGCGCGCAAATTACCCACTCCCGACCCGGGGAGGTAGTGACGAAAAATAACAATACAGGACTCTTTCGAGGCCCTGTAATTGGAATGAGTCCACTTTAAATCCTTTAACGAGGATCCATTGGAGGGCAAGTCTGGTGCCAGCAGCCGCGGTAATTCCAGCTCCAATAGCGTATATTAAAGTTGCTGCAGTTAAAAAGCTCGTA…	67792	73	1609	405746
chr22_KI270733v1_random	+	126648	126702	G6914.4	CGAGCCACCGCCCGTCCCCGCCCCTTGCCTCTCGGCGCCCCCTCGATGCTCTTAG	829	8	53	5647
chr22_KI270733v1_random	+	126703	126747	G6914.5	CTGAGTGTCCCGCGGGGCCCGAAGCGTTTACTTTGAAAAAATTAG	1481	11	68	12842	FP671120.1
chr22_KI270733v1_random	+	126748	126935	G6914.6	AGTGTTCAAAGCAGGCCCGAGCCGCCTGGATACCGCAGCTAGGAATAATGGAATAGGACCGCGGTTCTATTTTGTTGGTTTTCGGAACTGAGGCCATGATTAAGAGGGACGGCCGGGGGCATTCGTATTGCGCCGCTAGAGGTGAAATTCTTGGACCGGCGCAAGACGGACCAGAGCGAAAGCATTTG	19258	39	520	128844
chr22_KI270733v1_random	+	126936	127779	G6914.7	CCAAGAATGTTTTCATTAATCAAGAACGAAAGTCGGAGGTTCGAAGACGATCAGATACCGTCGTAGTTCCGACCATAAACGATGCCGACCGGCGATGCGGCGGCGTTATTCCCATGACCCGCCGGGCAGCTTCCGGGAAACCAAAGTCTTTGGGTTCCGGGGGGAGTATGGTTGCAAAGCTGAAACTTAAAGGAATTGACGGAAGGGCACCACCAGGAGTGGAGCCTGCGGCTTAATTTGACTCAACACGGGAAACCTCACCCGGCCCGGACACGGACAGGATTGACAGATTGATAGCTCTTTCTCGATTCCGTGGGTGGTGGTGCATGGCCGTTCTTAGTTGGTGGAGCGATTTGTCTGGTTAATTCCGATAACGAACGAGACTCTGGCATGCTAACT…	103225	177	3613	721820
chr22_KI270733v1_random	+	128869	129033	G6916.1	CCTCGTACGACTCTTAGCGGTGGATCACTCGGCTCGTGCGTCGATGAAGAACGCAGCTAGCTGCGAGAATTAATGTGAATTGCAGGACACATTGATCATCGACACTTCGAACGCACTTGCGGCCCCGGGTTCCTCCCGGGGCTACGCCTGTCTGAGCGTCGCTTG	188192	37	6976	1730441	FP671120.1
chr22_KI270733v1_random	+	130073	130095	G6922.1	TCGGCCGCGCGCTCTCTCTCCCG	135	3	3	671
chr22_KI270733v1_random	+	130099	130127	G6922.2	CCTCTCCCCCTCGCCGGGCCCGTCTCCCG	69	2	2	150
chr22_KI270733v1_random	+	130192	130447	G6923.1	CCCCCTCCGAGACGCGACCTCAGATCAGACGTGGCGACCCGCTGAATTTAAGCATATTAGTCAGCGGAGGAGAAGAAACTAACCAGGATTCCCTCAGTAACGGCGAGTGAACAGGGAAGAGCCCAGCGCCGAATCCCCGCCCCGCGGCGGGGCGCGGGACATGTGGCGTACGGAAGACCCGCTCCCCGGCGCCGCTCGTGGGGGGCCCAAGTCCTTCTGATCGAGGCCCAGCCCGTGGACGGTGTGAGGCCGGTAG	161448	33	4869	1021314
chr22_KI270733v1_random	+	130448	130496	G6923.2	CGGCCCCCGGCGCGCCGGGCCCGGGTCTTCCCGGAGTCGGGTTGCTTGG	834	7	18	6395
chr22_KI270733v1_random	+	130498	130604	G6923.3	AATGCAGCCCAAAGCGGGTGGTAAACTCCATCTAAGGCTAAATACCGGCACGAGACCGATAGTCAACAAGTACCGTAAGGGAAAGTTGAAAAGAACTTTGAAGAGAG	8779	11	130	40318
chr22_KI270733v1_random	+	130605	130728	G6923.4	AGTTCAAGAGGGCGTGAAACCGTTAAGAGGTAAACGGGTGGGGTCCGCGCAGTCCGCCCGGAGGATTCAACCCGGCGGCGGGTCCGGCCGTGTCGGCGGCCCGGCGGATCTTTCCCGCCCCCCG	17910	15	318	83257	FP671120.1
chr22_KI270733v1_random	+	130888	130951	G6924.1	CATTTCCACCGCGGCGGTGCGCCGCGACCGGCTCCGGGACGGCTGGGAAGGCCCGGCGGGGAAG	7507	6	231	41449
chr22_KI270733v1_random	+	131169	131338	G6925.1	ACCCGTCGCCGCGCTCTCCCCCCTCCCGGCGCCCACCCCCGCGGGGAATCCCCCGCGAGGGGGGTCTCCCCCGCGGGGGCGCGCCGGCGTCTCCTCGTGGGGGGGCCGGGCCACCCCTCCCACGGCGCGACCGCTCTCCCACCCCTCCTCCCCGCGCCCCCGCCCCGGCG	2385	9	33	5020
chr22_KI270733v1_random	+	131351	131427	G6925.2	CCGCGCGCGGGTCGGGGGGCGGGGCGGACTGTCCCCAGTGCGCCCCGGGCGGGTCGCGCCGTCGGGCCCGGGGGAGG	12477	5	98	24799
chr22_KI270733v1_random	+	131428	131459	G6925.3	TTCTCTCGGGGCCACGCGCGCGTCCCCCGAAG	1382	5	23	5457
chr22_KI270733v1_random	+	131475	131599	G6925.4	CGAGCGCACGGGGTCGGCGGCGACGTCGGCTACCCACCCGACCCGTCTTGAAACACGGACCAAGGAGTCTAACACGTGCGCGAGTCGGGGGCTCGCACGAAAGCCGCCGTGGCGCAATGAAGGTG	23300	13	337	87536
chr22_KI270733v1_random	+	131612	132373	G6925.5	CTCGCCGGCCGAGGTGGGATCCCGAGGCCTCTCCAGTCCGCCGAGGGCGCACCACCGGCCCGTCTCGCCCGCCGCGCCGGGGAGGTGGAGCACGAGCGCACGTGTTAGGACCCGAAAGATGGTGAACTATGCCTGGGCAGGGCGAAGCCAGAGGAAACTCTGGTGGAGGTCCGTAGCGGTCCTGACGTGCAAATCGGTCGTCCGACCTGGGTATAGGGGCGAAAGACTAATCGAACCATCTAGTAGCTGGTTCCCTCCGAAGTTTCCCTCAGGATAGCTGGCGCTCTCGCAGACCCGACGCACCCCCGCCACGCAGTTTTATCCGGTAAAGCGAATGATTAGAGGTCTTGGGGCCGAAACGATCTCAACCTATTCTCAAACTTTAAATGGGTAAGAAGC…	320283	121	8887	2449724
chr22_KI270733v1_random	+	132412	132730	G6926.1	CCTCCTCCCCTCCTCCCGCCCACGCCCCGCTCCCCGCCCCCGGAGCCCCGCGGACGCTACGCCGCGACGAGTAGGAGGGCCGCTGCGGTGAGCCTTGAAGCCTAGGGCGCGGGCCCGGGTGGAGCCGCCGCAGGTGCAGATCTTGGTGGTAGTAGCAAATATTCAAACGAGAACTTTGAAGGCCGAAGTGGAGAAGGGTTCCATGTGAACAGCAGTTGAACATGGGTCAGTCGGTCCTGAGAGATGGGCGAGCGCCGTTCCGAAGGGACGGGCGATGGCCTCCGTTGCCCTCGGCCGATCGAAAGGGAGTCGGGTTCAG	213329	44	5025	1359180
chr22_KI270733v1_random	+	132731	132766	G6926.2	ATCCCCGAATCCGGAGTGGCGGAGATGGGCGCCGCG	13971	4	150	42519	FP671120.1
chr22_KI270733v1_random	+	132767	133139	G6926.3	AGGCGTCCAGTGCGGTAACGCGACCGATCCCGGAGAAGCCGGCGGGAGCCCCGGGGAGAGTTCTCTTTTCTTTGTGAAGGGCAGGGCGCCCTGGAATGGGTTCGCCCCGAGAGAGGGGCCCGTGCCTTGGAAAGCGTCGCGGTTCCGGCGGCGTCCGGTGAGCTCTCGCTGGCCCTTGAAAATCCGGGGGAGAGGGTGTAAATCTCGCGCCGGGCCGTACCCATATCCGCAGCAGGTCTCCAAGGTGAACAGCCTCTGGCATGTTGGAACAATGTAGGTAAGGGAAGTCGGCAAGCCGGATCCGTAACTTCGGGATAAGGATTGGCTCTAAGGGCTGGGTCGGTCGGGCTGGGGCGCGAAGCGGGGCTGGGCG	100785	64	2759	741451
chr22_KI270733v1_random	+	133227	133305	G6926.4	CGCTCGCTCCCTCCCCACCCCGCGCCCTCTCTCTCTCTCTCTCCCCCGCTCCCCGTCCTCCCCCCTCCCCGGGGGAGCG	493	12	38	3207
chr22_KI270733v1_random	+	133455	133484	G6926.5	CCGGGCCCTTCCCGTGGATCGCCCCAGCTG	171	4	4	513
chr22_KI270733v1_random	+	133546	133577	G6927.1	CACCCCACGTCTCGTCGCGCGCGCGTCCGCTG	110	2	5	413
chr22_KI270733v1_random	+	133606	133636	G6927.2	CGGTCGGCGGGCGGCGGGGCGGGGCGGTTCG	619	3	10	1111
chr22_KI270733v1_random	+	133663	133705	G6928.1	GTCCGCCCCCCGTTCCCCCCTCCTCCTCGGCGCGCGGCGGCGG	68	2	2	281	FP671120.1
chr22_KI270733v1_random	+	133722	133758	G6928.2	CGGAGGGGCCGCGGGCCGGTCCCCCCCGCCGGGTCCG	393	2	4	667	FP671120.1
chr22_KI270733v1_random	+	133836	133932	G6928.3	GGGAATCCGACTGTTTAATTAAAACAAAGCATCGCGAAGGCCCGCGGCGGGTGTTGACGCGATGTGATTTCTGCCCAGTGCTCTGAATGTCAAAGTG	343488	23	18438	3784547
chr22_KI270733v1_random	+	133954	134049	G6928.4	GTAAACGGCGGGAGTAACTATGACTCTCTTAAGGTAGCCAAATGCCTCGTCATCTAATTAGTGACGCGCATGAATGGATGAACGAGATTCCCACTG	41273	20	600	194764
chr22_KI270733v1_random	+	134070	134211	G6928.5	AAACCACAGCCAAGGGAACGGGCTTGGCGGAATCAGCGGGGAAAGAAGACCCTGTTGAGCTTGACTCTAGTCTGGCACGGTGAAGAGACATGAGAGGTGTAGAATAAGTGGGAGGCCCCCGGCGCCCCCCCGGTGTCCCCGC	35273	20	813	158510
chr22_KI270733v1_random	+	134213	134351	G6928.6	AGGGGCCCGGGGCGGGGTCCGCCGGCCCTGCGGGCCGCCGGTGAAATACCACTACTCTGATCGTTTTTTCACTGACCCGGTGAGGCGGGGGGGCGAGCCCCGAGGGGCTCTCGCTTCTGGCGCCAAGCGCCCGGCCGCG	38749	21	943	214918
chr22_KI270733v1_random	+	134354	135029	G6928.7	CCGGCCGGGCGCGACCCGCTCCGGGGACAGTGCCAGGTGGGGAGTTTGACTGGGGCGGTACACCTGTCAAACGGTAACGCAGGTGTCCTAAGGCGAGCTCAGGGAGGACAGAAACCTCCCGTGGAGCAGAAGGGCAAAAGCTCGCTTGATCTTGATTTTCAGTACGAATACAGACCGTGAAAGCGGGGCCTCACGATCCTTCTGACCTTTTGGGTTTTAAGCAGGAGGTGTCAGAAAAGTTACCACAGGGATAACTGGCTTGTGGCGGCCAAGCGTTCATAGCGACGTCGCTTTTTGATCCTTCGATGTCGGCTCTTCCTATCATTGTGAAGCAGAATTCACCAAGCGTTGGATTGTTCACCCACTAATAGGGAACGTGAGCTGGGTTTAGACCGTCGT…	614663	145	22626	3752163
chr22_KI270733v1_random	+	135086	135122	G6928.8	TGCCCTTCGTCCTGGGAAACGGGGCGCGGCCGGAAAG	596	3	12	1607
chr22_KI270733v1_random	+	135124	135279	G6928.9	CGGCCGCCCCCTCGCCCGTCACGCACCGCACGTTCGTGGGGAACCTGGCGCTAAACCATTCGTAGACGACCTGCTTCTGGGTCGGGGTTTCGTACGTAGCAGAGCAGCTCCCTCGCTGCGATCTATTGAAAGTCAGCCCTCGACACAAGGGTTTGT	30967	31	1242	242261	FP671120.1
chr22_KI270733v1_random	+	167780	167827	G6929.1	CTTCGTGATCGATGTGGTGACGTCGTGCTCTCCCGGGCCGGGTCCGAG	43	7	9	427	FP671120.1
chr22_KI270733v1_random	+	168815	168847	G6933.1	ATCCCCCGGGCCGCCGCCTCTGTCTCTGCCTCC	42	3	3	265
chr22_KI270733v1_random	+	171012	171194	G6937.1	TACCTGGTTGATCCTGCCAGTAGCATATGCTTGTCTCAAAGATTAAGCCATGCATGTCTAAGTACGCACGGCCGGTACAGTGAAACTGCGAATGGCTCATTAAATCAGTTATGGTTCCTTTGGTCGCTCGCTCCTCTCCTACTTGGATAACTGTGGTAATTCTAGAGCTAATACATGCCGACG	40580	47	2043	501143
chr22_KI270733v1_random	+	171212	171236	G6937.2	CGGGGGGGATGCGTGCATTTATCAG	191	3	3	1071	FP671120.1
chr22_KI270733v1_random	+	171292	171558	G6937.3	CGGCTTTGGTGACTCTAGATAACCTCGGGCCGATCGCACGCCCCCCGTGGCGGCGACGACCCATTCGAACGTCTGCCCTATCAACTTTCGATGGTAGTCGCCGTGCCTACCATGGTGACCACGGGTGACGGGGAATCAGGGTTCGATTCCGGAGAGGGAGCCTGAGAAACGGCTACCACATCCAAGGAAGGCAGCAGGCGCGCAAATTACCCACTCCCGACCCGGGGAGGTAGTGACGAAAAATAACAATACAGGACTCTTTCGAGG	50472	46	1054	261870
chr22_KI270733v1_random	+	171559	171725	G6937.4	CCCTGTAATTGGAATGAGTCCACTTTAAATCCTTTAACGAGGATCCATTGGAGGGCAAGTCTGGTGCCAGCAGCCGCGGTAATTCCAGCTCCAATAGCGTATATTAAAGTTGCTGCAGTTAAAAAGCTCGTAGTTGGATCTTGGGAGCGGGCGGGCGGTCCGCCGCG	17637	23	597	145602
chr22_KI270733v1_random	+	171733	171783	G6937.5	CCACCGCCCGTCCCCGCCCCTTGCCTCTCGGCGCCCCCTCGATGCTCTTAG	879	7	45	6044	FP671120.1
chr22_KI270733v1_random	+	171784	171828	G6937.6	CTGAGTGTCCCGCGGGGCCCGAAGCGTTTACTTTGAAAAAATTAG	1447	10	59	12603	FP671120.1
chr22_KI270733v1_random	+	171829	172016	G6937.7	AGTGTTCAAAGCAGGCCCGAGCCGCCTGGATACCGCAGCTAGGAATAATGGAATAGGACCGCGGTTCTATTTTGTTGGTTTTCGGAACTGAGGCCATGATTAAGAGGGACGGCCGGGGGCATTCGTATTGCGCCGCTAGAGGTGAAATTCTTGGACCGGCGCAAGACGGACCAGAGCGAAAGCATTTG	19103	39	511	126320
chr22_KI270733v1_random	+	172017	172860	G6937.8	CCAAGAATGTTTTCATTAATCAAGAACGAAAGTCGGAGGTTCGAAGACGATCAGATACCGTCGTAGTTCCGACCATAAACGATGCCGACCGGCGATGCGGCGGCGTTATTCCCATGACCCGCCGGGCAGCTTCCGGGAAACCAAAGTCTTTGGGTTCCGGGGGGAGTATGGTTGCAAAGCTGAAACTTAAAGGAATTGACGGAAGGGCACCACCAGGAGTGGAGCCTGCGGCTTAATTTGACTCAACACGGGAAACCTCACCCGGCCCGGACACGGACAGGATTGACAGATTGATAGCTCTTTCTCGATTCCGTGGGTGGTGGTGCATGGCCGTTCTTAGTTGGTGGAGCGATTTGTCTGGTTAATTCCGATAACGAACGAGACTCTGGCATGCTAACT…	103277	174	3540	724898
chr22_KI270733v1_random	+	173948	174111	G6939.1	CCTCGTACGACTCTTAGCGGTGGATCACTCGGCTCGTGCGTCGATGAAGAACGCAGCTAGCTGCGAGAATTAATGTGAATTGCAGGACACATTGATCATCGACACTTCGAACGCACTTGCGGCCCCGGGTTCCTCCCGGGGCTACGCCTGTCTGAGCGTCGCTT	189169	37	6855	1739064
chr22_KI270733v1_random	+	175143	175234	G6944.1	GGGGCGCCGTCGGCCGCGCGCTCTCTCTCCCGTCGCCTCTCCCCCTCGCCGGGCCCGTCTCCCGACGGAGCGTCGGGCGGGCGGTCGGGCCG	258	6	9	1108
chr22_KI270733v1_random	+	175271	175526	G6944.2	CCCCCTCCGAGACGCGACCTCAGATCAGACGTGGCGACCCGCTGAATTTAAGCATATTAGTCAGCGGAGGAGAAGAAACTAACCAGGATTCCCTCAGTAACGGCGAGTGAACAGGGAAGAGCCCAGCGCCGAATCCCCGCCCCGCGGCGGGGCGCGGGACATGTGGCGTACGGAAGACCCGCTCCCCGGCGCCGCTCGTGGGGGGCCCAAGTCCTTCTGATCGAGGCCCAGCCCGTGGACGGTGTGAGGCCGGTAG	161966	33	4907	1024415
chr22_KI270733v1_random	+	175527	175574	G6944.3	CGGCCCCCGGCGCGCCGGGCCCGGGTCTTCCCGGAGTCGGGTTGCTTG	776	7	23	5967
chr22_KI270733v1_random	+	175577	175683	G6944.4	AATGCAGCCCAAAGCGGGTGGTAAACTCCATCTAAGGCTAAATACCGGCACGAGACCGATAGTCAACAAGTACCGTAAGGGAAAGTTGAAAAGAACTTTGAAGAGAG	8676	12	134	39906
chr22_KI270733v1_random	+	175686	175807	G6944.5	TTCAAGAGGGCGTGAAACCGTTAAGAGGTAAACGGGTGGGGTCCGCGCAGTCCGCCCGGAGGATTCAACCCGGCGGCGGGTCCGGCCGTGTCGGCGGCCCGGCGGATCTTTCCCGCCCCCCG	17779	16	291	82815
chr22_KI270733v1_random	+	175967	176016	G6945.1	CATTTCCACCGCGGCGGTGCGCCGCGACCGGCTCCGGGACGGCTGGGAAG	7306	6	199	41402	FP236383.1
chr22_KI270733v1_random	+	176216	176302	G6946.1	CACTCGCCGAATCCCGGGGCCGAGGGAGCGAGACCCGTCGCCGCGCTCTCCCCCCTCCCGGCGCCCACCCCCGCGGGGAATCCCCCG	1923	6	24	5347	FP236383.1
chr22_KI270733v1_random	+	176307	176344	G6946.2	GGGGGTCTCCCCCGCGGGGGCGCGCCGGCGTCTCCTCG	449	2	2	987
chr22_KI270733v1_random	+	176345	176409	G6946.3	TGGGGGGGCCGGGCCACCCCTCCCACGGCGCGACCGCTCTCCCACCCCTCCTCCCCGCGCCCCCG	274	3	4	836
chr22_KI270733v1_random	+	176430	176538	G6946.4	CCGCGCGCGGGTCGGGGGGCGGGGCGGACTGTCCCCAGTGCGCCCCGGGCGGGTCGCGCCGTCGGGCCCGGGGGAGGTTCTCTCGGGGCCACGCGCGCGTCCCCCGAAG	13602	10	119	30120
chr22_KI270733v1_random	+	176552	176603	G6946.5	AGCGAGCGCACGGGGTCGGCGGCGACGTCGGCTACCCACCCGACCCGTCTTG	2052	6	28	9290	FP236383.1
chr22_KI270733v1_random	+	176604	176764	G6946.6	AAACACGGACCAAGGAGTCTAACACGTGCGCGAGTCGGGGGCTCGCACGAAAGCCGCCGTGGCGCAATGAAGGTGAAGGCCGGCGCGCTCGCCGGCCGAGGTGGGATCCCGAGGCCTCTCCAGTCCGCCGAGGGCGCACCACCGGCCCGTCTCGCCCGCCG	25876	16	374	93982
chr22_KI270733v1_random	+	176765	177402	G6946.7	CGCCGGGGAGGTGGAGCACGAGCGCACGTGTTAGGACCCGAAAGATGGTGAACTATGCCTGGGCAGGGCGAAGCCAGAGGAAACTCTGGTGGAGGTCCGTAGCGGTCCTGACGTGCAAATCGGTCGTCCGACCTGGGTATAGGGGCGAAAGACTAATCGAACCATCTAGTAGCTGGTTCCCTCCGAAGTTTCCCTCAGGATAGCTGGCGCTCTCGCAGACCCGACGCACCCCCGCCACGCAGTTTTATCCGGTAAAGCGAATGATTAGAGGTCTTGGGGCCGAAACGATCTCAACCTATTCTCAAACTTTAAATGGGTAAGAAGCCCGGCTCGCTGGCGTGGAGCCGGGCGTGGAATGCGAGTGCCTAGTGGGCCACTTTTGGTAAGCAGAACTGGCGC…	315640	111	8663	2440043
chr22_KI270733v1_random	+	177409	177455	G6946.8	CGCGCGCGTGTGGTGTGCGTCGGAGGGCGGCGGCGGCGGCGGCGGCG	1602	5	25	4928
chr22_KI270733v1_random	+	177509	177949	G6947.1	CCCACGCCCCGCTCCCCGCCCCCGGAGCCCCGCGGACGCTACGCCGCGACGAGTAGGAGGGCCGCTGCGGTGAGCCTTGAAGCCTAGGGCGCGGGCCCGGGTGGAGCCGCCGCAGGTGCAGATCTTGGTGGTAGTAGCAAATATTCAAACGAGAACTTTGAAGGCCGAAGTGGAGAAGGGTTCCATGTGAACAGCAGTTGAACATGGGTCAGTCGGTCCTGAGAGATGGGCGAGCGCCGTTCCGAAGGGACGGGCGATGGCCTCCGTTGCCCTCGGCCGATCGAAAGGGAGTCGGGTTCAGATCCCCGAATCCGGAGTGGCGGAGATGGGCGCCGCGAGGCGTCCAGTGCGGTAACGCGACCGATCCCGGAGAAGCCGGCGGGAGCCCCGGGGAGAGTT…	233225	63	5102	1425501
chr22_KI270733v1_random	+	177950	178264	G6947.2	CCCCGAGAGAGGGGCCCGTGCCTTGGAAAGCGTCGCGGTTCCGGCGGCGTCCGGTGAGCTCTCGCTGGCCCTTGAAAATCCGGGGGAGAGGGTGTAAATCTCGCGCCGGGCCGTACCCATATCCGCAGCAGGTCTCCAAGGTGAACAGCCTCTGGCATGTTGGAACAATGTAGGTAAGGGAAGTCGGCAAGCCGGATCCGTAACTTCGGGATAAGGATTGGCTCTAAGGGCTGGGTCGGTCGGGCTGGGGCGCGAAGCGGGGCTGGGCGCGCGCCGCGGCTGGACGAGGCGCCGCCGCCCCCCCCACGCCCGGGG	94694	46	2659	717642
chr22_KI270733v1_random	+	178283	178384	G6947.3	CCCCCGCCCCACCCCGCGCGCGCCGCTCGCTCCCTCCCCACCCCGCGCCCTCTCTCTCTCTCTCTCCCCCGCTCCCCGTCCTCCCCCCTCCCCGGGGGAGCG	496	11	42	3061
chr22_KI270733v1_random	+	178505	178578	G6947.4	CCGGCGGCGGCGGCGACTCTGGACGCGAGCCGGGCCCTTCCCGTGGATCGCCCCAGCTGCGGCGGGCGTCGCGG	283	2	3	916
chr22_KI270733v1_random	+	178634	178653	G6948.1	TCTCGTCGCGCGCGCGTCCG	119	2	2	455
chr22_KI270733v1_random	+	178687	178715	G6948.2	GTCGGCGGGCGGCGGGGCGGGGCGGTTCG	643	3	8	1172
chr22_KI270733v1_random	+	178809	178837	G6949.1	CCGCGGGCCGGTCCCCCCCGCCGGGTCCG	370	2	7	602
chr22_KI270733v1_random	+	178838	178857	G6950.1	CCCCCGGGGCCGCGGTTCCG	1776	2	14	3531	FP671120.1
chr22_KI270733v1_random	+	178915	179011	G6950.2	GGGAATCCGACTGTTTAATTAAAACAAAGCATCGCGAAGGCCCGCGGCGGGTGTTGACGCGATGTGATTTCTGCCCAGTGCTCTGAATGTCAAAGTG	344148	23	18032	3779663
chr22_KI270733v1_random	+	179034	179093	G6950.3	TAAACGGCGGGAGTAACTATGACTCTCTTAAGGTAGCCAAATGCCTCGTCATCTAATTAG	40681	14	555	190810
chr22_KI270733v1_random	+	179094	179289	G6950.4	TGACGCGCATGAATGGATGAACGAGATTCCCACTGTCCCTACCTACTATCCAGCGAAACCACAGCCAAGGGAACGGGCTTGGCGGAATCAGCGGGGAAAGAAGACCCTGTTGAGCTTGACTCTAGTCTGGCACGGTGAAGAGACATGAGAGGTGTAGAATAAGTGGGAGGCCCCCGGCGCCCCCCCGGTGTCCCCG	35927	29	820	163396
chr22_KI270733v1_random	+	179292	179393	G6950.5	AGGGGCCCGGGGCGGGGTCCGCCGGCCCTGCGGGCCGCCGGTGAAATACCACTACTCTGATCGTTTTTTCACTGACCCGGTGAGGCGGGGGGGCGAGCCCCG	5659	15	277	52546	FP671120.1
chr22_KI270733v1_random	+	179394	179430	G6950.6	AGGGGCTCTCGCTTCTGGCGCCAAGCGCCCGGCCGCG	32710	5	663	159890	FP671120.1
chr22_KI270733v1_random	+	179433	179471	G6950.7	CCGGCCGGGCGCGACCCGCTCCGGGGACAGTGCCAGGTG	3333	3	18	7931
chr22_KI270733v1_random	+	179506	179767	G6950.8	GTAACGCAGGTGTCCTAAGGCGAGCTCAGGGAGGACAGAAACCTCCCGTGGAGCAGAAGGGCAAAAGCTCGCTTGATCTTGATTTTCAGTACGAATACAGACCGTGAAAGCGGGGCCTCACGATCCTTCTGACCTTTTGGGTTTTAAGCAGGAGGTGTCAGAAAAGTTACCACAGGGATAACTGGCTTGTGGCGGCCAAGCGTTCATAGCGACGTCGCTTTTTGATCCTTCGATGTCGGCTCTTCCTATCATTGTGAAGCAG	99265	64	5925	874326
chr3	+	14394732	14394758	G6960.1	CCTGGGAATAACGGGTGCTGTAGGCTT	44	2	4	287
chr3	+	15738591	15738634	G6962.1	TTCTGGGCTGTAGTGCGCTATGCCGATCGGGTGTCCGCACTAAG	32	2	2	245
chr3	+	23919199	23919234	G6964.1	CGAGCTGGACGCCACTGTGGGGCTCTGAGAGTCCTG	67	2	2	412	RPL15
chr3	+	33103060	33103106	G6971.1	AGGAGGATTGCTTGAGTCCAGGAGTTCTGGGCTGTAGTGCGCTATGC	55	2	6	542
chr3	+	33866965	33867002	G6972.1	CACTGTAAATCTTATAATTTTAAAATAAATTACTTAAG	17	4	18	237	PDCD6IP
chr3	+	35744527	35744547	G6973.1	TCACAGTGAACCGGTCTCTTT	11	2	2	75
chr3	+	37969413	37969434	G6974.1	TTCAAGTAATCCAGGATAGGCT	42	4	12	240
chr3	+	39407621	39407669	G6976.1	ATTCCCGTCGTAACTTAAAGGGAAATTTTCACAATGTCCGGAGCCCTTG	27	5	7	279	RPSA
chr3	+	39408451	39408499	G6977.1	AAGTGTGCTATATCAATGGCAGGATTTTCGCTAACACCAGTAGAGCTTG	43	3	4	518
chr3	+	39411056	39411089	G6979.1	TGCACATTGTTAGAGCTTGGAGTTGAGGCTACTG	233	6	7	2133
chr3	+	52690779	52690817	G7022.1	ATTTAAGTGAATGAAAAATTACAAGATCCAACTCTGATT	342	5	18	2635
chr3	+	52692745	52692769	G7024.1	CAAATGATGATAAACTGGATCTGAC	128	3	3	765
chr3	+	52694352	52694400	G7027.1	TATGCATGAGCTGTGTAAATTTTGTGAATATGTATTATATTAAAACCAG	26	8	24	291	GNL3
chr3	+	58105124	58105171	G7031.1	TCCGTGCTTGGGGCCCTGGGCTCCATGGTGGGATTGTCGGGCGGTCAG	33	2	2	216	FLNB
chr3	+	72929156	72929188	G7038.1	TCTTACTACTTTGACCGCGATGATGTGGCTTTG	14	2	2	137
chr3	+	101768971	101768999	G7048.1	TTTGTATATATGTAAATAACTTTATTCTG	15	4	15	192	CEP97
chr3	+	113632769	113632812	G7051.1	GAGTCCAGGAGTTCTGGGCTGTAGTGCGCTATGCCGATCGGGTG	51	3	3	464
chr3	+	127403012	127403030	G7058.1	CCTTTGGGTCGGGGTTTCG	28	2	28	168
chr3	+	128069718	128069764	G7067.1	CTCTCATCATGGCGCGTGCTGCTGCGGCATATGGACTTTTAATAATG	20	2	2	239	SEC61A1
chr3	+	128070948	128070970	G7072.1	TTTCGAGCTGGCTTTAGACATTG	14	2	4	122	SEC61A1
chr3	+	133574049	133574089	G7079.1	CTGAGACGGAGGAGCGGAGCCTGGACAACTTCTTTGCCAAG	21	2	4	47	CDV3
chr3	+	137880319	137880344	G7081.1	ATTGATCTTGGCACCACCTACTCTTG	10	3	4	70
chr3	+	141926010	141926054	G7085.1	CTTAATATGCCGTGCTATGTAAATATTTTATGGATATAACAACTG	13	6	12	146	ATP1B3
chr3	+	157153548	157153579	G7088.1	GGCTGGTCCGATGGTAGTGGGTTATCAGAACT	40	3	3	334
chr3	+	165440759	165440777	G7091.1	ATAACTGTGGTAATTCTAA	12	2	2	82	LINC01322
chr3	+	179779628	179779669	G7098.1	ATGACCTGCTTCTGGGTCGGGGTTTTGTACGTAGCAGAGCAG	165	7	18	1635	USP13
chr3	+	180971798	180971828	G7100.1	TCTATTATTTTGAACATAATTCCATTTCCTG	11	2	9	144	FXR1
chr3	+	184302440	184302463	G7113.1	TTTAGCCGCTTCCCTGAAGCTCTG	28	2	2	222	PSMD2
chr3	+	184307372	184307430	G7118.1	CCTACACTCCGGAGGGCTGTACCTTTAGCACTGGCCCTCATCTCTGTTTCAAATCCACG	15	2	3	137	PSMD2
chr3	+	184325696	184325725	G7133.1	TTCCTCTGATGACTTCCTGTTAGTGCCACG	83	2	2	869
chr3	+	184325742	184325772	G7134.1	ACACCATGATGGAACTGAGGATCTGAGGAAG	58	2	4	286	EIF4G1
chr3	+	186784798	186784864	G7143.1	GTGAAATGATGGCAATCATCTTTCGGGACTGACCTGAAATGAAGAGAATACTCATTGCTGATCACTT	649	12	39	5888
chr3	+	186787328	186787366	G7148.1	CTAAGTGCTGTGTTGTCGTTCCCCCTGCTTAAAATAAAG	40	2	3	506
chr3	-	12840312	12840349	G7161.1	CTCCGTAGCTGGCGATTGGAAGACACTCTGCGACAGTG	405	7	11	3224	RPL32
chr3	-	31955484	31955503	G7172.1	GTGGCATTGCTGGGTAGCTG	198	2	332	856	OSBPL10
chr3	-	45085492	45085520	G7180.1	TTTTCCTGGACACCGCCAACTTCACATTG	15	3	3	132	CDCP1
chr3	-	45085751	45085792	G7181.1	CAAAGTTGGCCACTGAGGAGCCACCTCCTCGCTCCCCTCCTG	12	2	8	82	CDCP1
chr3	-	45095442	45095462	G7186.1	TCTAGAATCTCGGACCTGCAG	17	2	2	83	CDCP1
chr3	-	45118529	45118568	G7192.1	CTGGGGACCCCGACTCTGCTGGCAAAACCCTGTTACATCG	14	2	3	94	CDCP1
chr3	-	46921763	46921802	G7196.1	TATATATGTATATATTTTGAACTTTCTAAAAAAAAATCTG	12	4	10	186	CCDC12
chr3	-	47678212	47678256	G7203.1	TATTTAACTAGCACTGCTTGTCGGAGGAACTTGACTGGAGATGTG	14	3	3	175	SMARCC1
chr3	-	48467888	48467912	G7211.1	TCTGTACACTTGTTTATAATAAATG	11	3	11	102	SHISA5
chr3	-	49020671	49020694	G7218.1	CAACGGAATCCCAAAAGCAGCTGT	58	3	6	121
chr3	-	49362507	49362549	G7234.1	AAGGATCTTCGGAATGATGAGCACACAAGGCGGGAGCTAGCCA	77	3	10	400	RHOA
chr3	-	51694463	51694500	G7239.1	ATGGGAGACTGCCTGGAATACCGGGTGCTGTAGGCTTT	674	7	386	5067
chr3	-	52254489	52254512	G7250.1	TTATTCTGTATATACAATTTTATG	37	7	38	439	WDR82
chr3	-	52268336	52268357	G7251.1	TGAGGTAGTAGTTTGTACAGTT	216	7	55	1850
chr3	-	53241160	53241220	G7262.1	CGGTCTGGGCTGAAGCTGGTTTCCTGGCCGAGGCGGAGCTGCTGAACCTGAGGAAGATCAG	47	3	5	367	TKT
chr3	-	96617321	96617345	G7271.1	TTTAACGGCCGCGGTACCCTAACCG	47	2	2	233	MTRNR2L12
chr3	-	96618403	96618429	G7279.1	TACACACCGCCCGTCACCCTCCTCAAG	253	3	5	995
chr3	-	96618431	96618460	G7280.1	AGTGCTTAGTTGAACAGGGCCCTGAAGCGC	2631	6	32	14204
chr3	-	98796124	98796149	G7282.1	TACTTATCTTACCTCGGCATGTACTG	11	2	5	105	DCBLD2
chr3	-	98808106	98808142	G7285.1	CTGGTCATGGTCCTCACTACTCTCATTCTCATATTAG	24	4	12	321	DCBLD2
chr3	-	116645608	116645653	G7302.1	TTATCTTCTACCTCCTGTATTTTCTACTGTAATAATGTAATTTAAG	27	4	11	306	BZW1
chr3	-	119824176	119824199	G7305.1	CTTGTACATTATATTTTCTTTCTG	14	2	12	184	GSK3B
chr3	-	128087755	128087778	G7314.1	CATCCCTCTTGACCTTCTGGACCG	11	2	5	72	RUVBL1
chr3	-	142827354	142827375	G7343.1	TGGTTGGTGTGGTGGCTGGAGG	18	2	7	119
chr3	-	146515974	146515999	G7346.1	ATTGAGACTATCTAAACTCATACCTG	10	2	10	70	PLSCR1
chr3	-	179017413	179017459	G7358.1	ATTAAAACCAATCAACTGTGAATTGTGAAATTGAAACTACTCTTTCG	12	2	11	169	ZMAT3
chr3	-	185418006	185418050	G7367.1	TGGGCATGTGGGACGTTTCTGCATTTGGACTGAAAGTGCTTTCCG	27	3	4	270
chr4	+	3127399	3127442	G7390.1	CCAGCTGTGACTTGACAAGCTCTGCCACTGATGGGGATGAGGAG	12	2	2	106	HTT
chr4	+	6641808	6641857	G7397.1	TTTTCTCTTTTTTCCTGTCTATGCTCTGTCTCACTTAACACTACGTTTTC	30	4	6	429	MRFAP1
chr4	+	7582514	7582554	G7404.1	TTCGTGGGGAACCTGGCGCTAAGCCATTCGTAGATGACCTG	427	6	32	2279	SORCS2
chr4	+	7582563	7582637	G7405.1	TCGGGGTTTCATATGTAGCAGAGCAGCTCCCTCGCTGCAATCTATTGAAAGTCAGCCCTCGACACAAGGGTTTGT	323	5	18	1956	SORCS2
chr4	+	13336593	13336639	G7406.1	ATTTTCCTTTGGGAGTTGATCTCTAATGCTTCTGATGCCTTGGACAA	14	4	13	188
chr4	+	26432932	26432966	G7412.1	CCACTGTAAATATTCTTCCTAACATCTTTAAATCG	11	2	11	132	RBPJ
chr4	+	56460511	56460546	G7421.1	ATTGCCCAAGGACTTCTAACAATAAACTCTCTTTTG	12	2	13	131	PAICS
chr4	+	57005683	57005717	G7423.1	ATCTTGCTGGGCCGCTGCTTGCATTCTTATTTAGA	12	2	12	153	POLR2B
chr4	+	57031118	57031149	G7424.1	CTTTTCTTCTGTAAATATATAATAAATTTTTG	49	4	48	764	POLR2B
chr4	+	74454935	74454962	G7436.1	TTGTAAATAATTTATTTAATATTTAATG	11	5	12	153	AREG
chr4	+	75886066	75886095	G7437.1	TGTTGTTGCCATGGTAATCCTGCTCAGTAC	494	9	24	4607
chr4	+	75886183	75886204	G7438.1	CCTCTAAGTCAGAATCCCGCCC	388	4	10	1542
chr4	+	75886492	75886538	G7440.1	AGCAGCTCCCTCGCTGTGATCTACTGAAAGTCAGCCCTCGACACAAG	46	3	16	201
chr4	+	78466354	78466385	G7446.1	TAACTCCCTCAAGGACCGGTTCACCTTCACTG	14	2	15	97	FRAS1
chr4	+	87893669	87893700	G7456.1	CACTTCGGGACAACTCCACCATGGGCTATATG	60	2	3	367	HSP90AB1
chr4	+	103737342	103737361	G7461.1	TGTGGAATGGCCTCTAGTGC	61	2	50	284
chr4	+	105279352	105279377	G7462.1	ATCTATAATTGTAAATATAAAACCTG	10	4	13	77	TET2
chr4	+	105484741	105484772	G7463.1	ATTCGGGCAAGTCCACCACTACTGGCCATCTG	15	2	4	87
chr4	+	118279187	118279215	G7468.1	AATCTCCATGTATCTTTGGGACCTGTCAG	297	7	8	2713	SNHG8
chr4	+	119237449	119237479	G7470.1	ACCTGCTTCTGGGTCGGGGTTTTGTATGTAG	31	3	25	299	USP53
chr4	+	119237501	119237522	G7471.1	ATCTATTGAAAGTCAGCCCTCG	300	2	5	1736	USP53
chr4	+	121816869	121816895	G7472.1	TATATCTGTATATATAACTATTAAAAG	10	3	10	98	EXOSC9
chr4	+	128155776	128155808	G7474.1	ACTGACTTCCTGCAGGCGGAGACTGATAAACTG	12	2	23	57
chr4	+	145110130	145110169	G7482.1	ACTTATTTCCGTGGATCTGAATTACAAAATTACTTTACAA	10	2	11	139	ABCE1
chr4	+	151103828	151103889	G7485.1	ATAAGTGATGAAAAAAGTTTCGGTCCCAGATGATGGCCAGTGATAACAACATTTTTCTGATG	177	5	18	1515
chr4	+	153414888	153414926	G7487.1	CTTGTGAATATGTAAATTTTAAACTATTATCTAACTAAG	14	5	18	197	MND1
chr4	+	164188769	164188791	G7488.1	ATATTGGAGGTGGGCAAACAAAG	19	2	7	69	HSPA5
chr4	+	164188799	164188821	G7488.2	CTCCTGAAGAAATTTCTGCCATG	9	2	2	59
chr4	+	164188961	164188993	G7489.1	TTATGAGGATCATTAACGAGCCTATGGCAGCTG	11	2	22	77
chr4	+	164189893	164189939	G7490.1	TATTCTTCGAGTGACAGCTGAAGACAAGGGTACAGGGAACAAAAATA	22	2	6	111
chr4	+	164190098	164190138	G7491.1	ATTGGAGATAAAGAAAAGCTGGGAGGTAAACTTTCCTCTGA	15	3	3	120
chr4	+	166142602	166142634	G7493.1	ATATTCAAATGAGAACTTTGAAGGCTGAAGAGG	69	3	31	386
chr4	+	189473777	189473831	G7502.1	ATGGTGACAAGAAGAAGAAGAAGAAGAAGAAGAAGAAGATTAAGGAAAAGTACAT	31	3	4	81
chr4	-	1712246	1712274	G7517.1	CCCTGCCCTGCTCTACTCTGCGCTCTCTG	14	2	2	106	SLBP
chr4	-	69430956	69431002	G7559.1	AGTGTGTAACAACTCACCTGCCGAATCAACTAGCCCTGAAAATGGAT	7131	9	83	44721
chr4	-	70839672	70839717	G7561.1	CTCTATCCCGTCGGGCGTCTCGGGCCGCCGCCGCCTGCTGCTGCTG	12	2	3	112
chr4	-	82895854	82895900	G7569.1	CTGTTCACATCATGATTTGTTGTGATTAATGTATGTGGATGAGGACA	91	4	12	960	SEC31A
chr4	-	85512010	85512030	G7577.1	GAGTAGAATGGCCTCTAGTGC	188	2	188	752
chr4	-	143349748	143349774	G7600.1	TTGCTATCGGGGACTACAATGGCCACG	59	2	3	339
chr4	-	163128783	163128812	G7606.1	ATTTTTAAAAACACTGTAAAATACTAAATG	11	2	11	99	NAF1
chr4	-	177659789	177659837	G7614.1	TATGCATGAGCTGTGTAAATTTTGTGAATATGTATTATATTAAAACCAG	23	10	15	222	GNL3
chr4	-	186588380	186588407	G7617.1	TTTTCATCGGCTGTGCCATTTCCCAACG	18	2	2	178	FAT1
chr4	-	186596857	186596906	G7623.1	CATCAGGCTGAACCTAAAGACAAGCACCTGGGACCCGCTACGGCTTTCTT	15	2	6	91	FAT1
chr4	-	186596979	186597020	G7624.1	CCGTGGAACATTGGGTTGGCGGAAGGAATTGGAATCGTTGTG	33	3	12	262	FAT1
chr4	-	186597682	186597705	G7626.1	TGATTCGGGTTTTAGGGGAGAAAG	24	2	4	102	FAT1
chr4	-	186597757	186597785	G7627.1	CTTAGTCCATACTGCAAAGATGAACCCTG	16	2	2	88	FAT1
chr4	-	186600029	186600073	G7629.1	TATGGACTCCATTTATTTGAATGGGCAGGAGCTCCCTTTAAACAG	20	2	6	135	FAT1
chr4	-	186611713	186611761	G7639.1	ATTTTATACTCACTGATTGACTCTGCTGATGGGCAGTTCTCCATTAACG	23	2	6	373	FAT1
chr4	-	186618056	186618095	G7645.1	ATCAGGGCATCTGATGCTGACTCAGGAACCAACGGCCAAG	35	3	7	115	FAT1
chr4	-	186619400	186619447	G7650.1	TTACCGACCTCAATGATAATCCACCACTCTTTGAACAACAGATTTATG	78	4	7	648	FAT1
chr4	-	186619532	186619575	G7651.1	CAGCACTGGCCTCATCTCACTACTCAGAACCCTGGATTACGAGC	74	4	5	583	FAT1
chr4	-	186619673	186619715	G7652.1	ACCCTGTCTGAGGCATCTGTAATTGGAACGTCTGTTGTTCAAG	40	2	7	439	FAT1
chr4	-	186620213	186620237	G7654.1	CATTACTACCTCAAGGAACATCATG	12	2	4	68	FAT1
chr4	-	186620679	186620719	G7658.1	ATGGCAGATTTGCCGGCCTTACCTCTGTCAAAATTAATGTG	23	5	10	214	FAT1
chr4	-	186621712	186621748	G7660.1	ATCCTGTCTTGGGCTCTATTAAAACTGCCAAAGAATT	15	2	4	164	FAT1
chr4	-	186628181	186628225	G7661.1	TTGTGTTGCAGGTGACGGCTCTGGACAAGGACAAAGGGAAAAATG	30	3	4	158	FAT1
chr4	-	186628306	186628351	G7662.1	ATGTGCCTGTAAAACGCAACTTTGCAAGGATTGTGGTCAATGTCAG	50	5	14	354	FAT1
chr4	-	186628520	186628564	G7663.1	ATCCTGCAACCGGCTCTCTCTATACTTCTGAGAAACTGGATCATG	57	2	4	553	FAT1
chr4	-	186636025	186636072	G7665.1	TAATATCTGTGGAGCCTCCTGGCATACCCCTTTGGTTTGACATCACTG	16	2	10	167	FAT1
chr4	-	186636596	186636644	G7666.1	AAAACTGGAGTGGTTTCGTCCAAGAGGTTTTCAGCAGCTGGAGAATATG	19	3	5	212	FAT1
chr4	-	186707339	186707364	G7673.1	TTTTTACAGGAGAGCTATTTTGTGGA	8	2	6	67	FAT1
chr5	+	10263186	10263206	G7697.1	TCATCCCCATGGCCCTCTCTG	18	2	2	106	CCT5
chr5	+	34038309	34038334	G7707.1	CAAAAGCTTGCTTGATCTTGATTTTC	12	2	6	126
chr5	+	34923187	34923232	G7710.1	TTTACTTTCACCATTTTGGATAATAGGATATGGTTTCGGAACTTTC	14	3	5	255	BRIX1
chr5	+	38846317	38846340	G7711.1	TTTGCTTGGCTGGGCTACCACCTG	15	3	7	113	OSMR
chr5	+	57262922	57262968	G7714.1	TTGAACATTATTTCTTTGTAAATGAATGTTGTAGGAATGAGGACTTG	16	2	10	220	GPBP1
chr5	+	66162465	66162486	G7718.1	AAGTTTGTGCGGATGGCAGGTG	13	3	15	63	SREK1
chr5	+	69177685	69177703	G7720.1	CCATCTGTACATATTACTG	14	2	7	91	CCNB1
chr5	+	71850945	71851050	G7721.1	AAGCCGGCGGGAGCCCCGGGGAGAGTTCTCTTTTCTTTGTGAAGGGCAGGGCGCCCTGGAATGGGTTCGCCCCGAGAGAGGGGCCCGTGCCTTGGAAAGCGTCGCG	1459	16	44	7627
chr5	+	71851052	71851086	G7722.1	TTCTGGCGGCATCCGGTGAGCTCTCGCTGGCCCTT	560	7	128	4018
chr5	+	77785860	77785896	G7726.1	ATCAAGATCATTGCTCCTCCTGAGCGCAAGTACTCTG	13	2	10	108
chr5	+	86620537	86620563	G7730.1	AATTCATGATACTGTAAACGCTTTCTG	75	3	6	728	COX7C
chr5	+	87760831	87760852	G7731.1	ATTGACTGATTTGGATTTTTTA	14	3	22	134
chr5	+	112161583	112161617	G7736.1	ATACCTTTGGTGTAGGAGCTGCATAAGTAACAGTT	78	5	7	776
chr5	+	123655086	123655108	G7747.1	TGGGGGGCCCAAGTCCTTCTGAT	391	6	16	2057
chr5	+	132867499	132867526	G7749.1	TTTTATCTTATCTACACATGGGGGACTG	23	2	4	221	UQCRQ
chr5	+	139278902	139278931	G7777.1	TACCTTTGGGCAGTGTTTTGCACCTCTGAG	223	2	3	2418
chr5	+	139682993	139683030	G7780.1	ATGCACCCGTCTTTAGAACCAAAAATATTCTCTCACAG	13	2	4	126	CXXC5
chr5	+	146511391	146511412	G7786.1	TTTCTTGTAAACTATACTCCTG	13	2	13	115	TCERG1
chr5	+	154054990	154055027	G7796.1	ATGCCACCTGCTTCAACTGTATATAATAAACACTTATG	19	4	15	189	MFAP3
chr5	+	155408685	155408717	G7805.1	AAAGCAGGGCCTCATGATCCTTCTGACCTTTTG	204	6	59	1974
chr5	+	160485372	160485392	G7809.1	TGAGAACTGAATTCCATGGGT	85	3	4	504	MIR3142HG
chr5	+	178055904	178055943	G7833.1	ATTTTGCGCCGGCTGCTCAGAAGATACCGTGAATCTAAGA	31	2	8	254
chr5	+	179716177	179716206	G7841.1	ACATGACTCCTCCTGTAAATCCTTCACGTG	12	2	2	86	CANX
chr5	+	179723701	179723744	G7845.1	CCCGTGGCTGTGGGTAGTCTATATTCTAACTGTAGCCCTTCCTG	13	3	6	114	CANX
chr5	+	181187745	181187766	G7856.1	TCTCTTCGGGGGCGTGGGTTCG	58	3	6	400
chr5	-	6372432	6372478	G7863.1	ATCCCCTGGGACTGCGATGCGGCGTGAGGCTGGGACTGCGAGTGCTG	11	2	12	87	MED10
chr5	-	14653235	14653266	G7873.1	TCCACCACTACTGGCCATCTGATCTATAAATG	76	2	2	479
chr5	-	23474133	23474153	G7881.1	TTTGCAGTAGCACTTTGGAAA	16	2	32	80
chr5	-	40832690	40832731	G7885.1	TATCAGTGATGTTGTAAAAATAAATGTCTGAACATATGAATG	185	8	29	1467
chr5	-	43495477	43495554	G7889.1	CTCTTCCTGGGGACAATGTGGGCTTCAATGTCAAGAATGTGTCTGTCAAGGATGTTCGTCGTGGCAACGTTGCTGGTG	37	4	5	359
chr5	-	66129366	66129395	G7896.1	ATGTGTTGTTGCCATGGTAATCCTGCTCAG	7067	11	117	72350
chr5	-	75674249	75674275	G7900.1	TAACTATATGTAGAAATTATTTTAATG	19	3	12	214	POC5
chr5	-	80651186	80651241	G7907.1	TACACACCGCCCGTCACCCTCCTCAAGTATACTTCAAAGGACATTTAACTAAAACC	329	7	7	1828	DHFR
chr5	-	80651436	80651562	G7909.1	CTTAAAACTCAAAGGACCTGGCGGTGCTTCATATCCCTCTAGAGGAGCCTGTTCTGTAATCGATAAACCCCGATCAACCTCACCACCTCTTGCTCAGCCTATATACCGCCATCTTCAGCAAACCCTG	1563	15	25	13579	DHFR
chr5	-	82276068	82276096	G7912.1	AAAACACTGTAGTAATAAATTTTCATATG	23	2	19	175	RPS23
chr5	-	86372854	86372885	G7913.1	CATTGGTGGTTCAGTGGTAGAATTCTCGCCTG	324	6	14	3550
chr5	-	94569467	94569508	G7916.1	TTTTTCATATCATTGGTCGTGGTTGTAGTCCGTGCGAGAATA	183	5	7	2255	KIAA0825
chr5	-	95898566	95898594	G7917.1	ATTGTAAATTCTAACTCCAACTCCCCTAG	10	2	10	80	ELL2
chr5	-	115391308	115391346	G7925.1	ACCTGCTTTTGGAGTACATGGGCAATGCTGGATGTAAAG	11	2	19	86
chr5	-	132878496	132878518	G7938.1	CACATACTTTGGACTCCTTTACA	15	2	2	118	AFF4
chr5	-	133971935	133971962	G7939.1	CTGTAATTAACAACACTTAAAAAACTTG	13	2	10	94	VDAC1
chr5	-	133980886	133980916	G7940.1	CACATTAACCTGGGCTGCGACATGGATTTCG	33	3	3	202	VDAC1
chr5	-	136080537	136080584	G7954.1	CTCAAGCGGTTACCTCCTCATGCCGGACTTTCTATCTGTCCATCTCTG	327	8	15	3516
chr5	-	138506779	138506827	G7958.1	ATTCAGTCACTCGTAGCTTTATTGGTCTGAACCAGCTCCTTGTTCCCAG	18	3	3	257	ETF1
chr5	-	138561043	138561071	G7964.1	AACGTGTGGAAAACTAATGACTGAGCACA	403	3	4	1995
chr5	-	141571971	141572027	G7976.1	ACCTCTCCCAGGACTGCTTCTGGACAAAGGTGAAGGAGGACCGCTTTGAGAACAATG	44	4	19	251	DIAPH1
chr5	-	141864695	141864733	G7981.1	CTGACTCTGGCTCTAATGCTGAGCTGGTTTACTCTCTGG	12	2	2	150	PCDH1
chr5	-	149496063	149496085	G7986.1	TAATCACTGTAAACATCTATATG	27	3	32	168	CSNK1A1
chr5	-	149551338	149551379	G7990.1	CTGGAGCTGGAGTAACAAGATGGCGTCGTCCGCGGAGTGACA	13	2	2	63	CSNK1A1
chr5	-	168555982	168556010	G8002.1	TTATTTATGTACATAGGGATAGTGGAATG	15	2	15	150	PANK3
chr5	-	172768279	172768302	G8005.1	TACTATCCTGTAAATATATCTTAA	14	2	14	126	DUSP1
chr5	-	175114809	175114827	G8006.1	TGATGGGGATTGGGGATTG	18	3	5	101
chr5	-	175115065	175115123	G8008.1	CTCTTTCTCGATTCTGTGGGTGGTGGTGCATGGCCATTCTTAGTTGGTGGAGTGATTTG	74	5	24	870
chr5	-	176527497	176527538	G8009.1	TCTTACTGTATATAACTCCAGGTGACGTTTCTATATTTATAG	34	3	36	406	RNF44
chr5	-	177351592	177351629	G8015.1	ATTTGGCGTTGGGGCTGGGGCCGGCGGTGCCTGGGAAG	14	2	2	86	LMAN2
chr5	-	179617816	179617840	G8025.1	CGGGGATTACCTTACAGAGCTACTG	14	2	3	79	HNRNPH1
chr5	-	179801673	179801694	G8031.1	AGGACCCCCGATTGAAGCCGTG	11	2	13	18	MGAT4B
chr5	-	180792557	180792593	G8035.1	CATTATCGGCCCTCGGCTGAGCTCTTCCCCATCATCG	11	2	8	87	MGAT1
chr5	-	181238185	181238224	G8041.1	TTATGGGATCTCAACGAAGGCAAACACCTTTACACGCTAG	30	2	3	213	RACK1
chr5	-	181241816	181241866	G8045.1	TCAGCCAATCCCCAAGTGGGAGTGAGGACATGTCCTGCAATTCTGAAGGGA	1974	8	41	13115
chr5	-	181242184	181242212	G8047.1	CTCCTGGGATGGAACCCTGCGCCTCTGGG	30	2	3	165	RACK1
chr5	-	181242256	181242286	G8048.1	CGTGCTCTGCGGGGTCACTCCCACTTTGTTA	35	5	6	288	RACK1
chr5	-	181243312	181243345	G8049.1	TCGGTGCTGAAATCCAGAGGCTGTTTCTGAGCTG	276	5	9	2634	RACK1
chr5	-	181243694	181243740	G8050.1	ATCGCTACTACCCCGCAGTTCCCGGACATGATCCTCTCCGCCTCTCG	24	2	3	205	RACK1
chr6	+	4428038	4428083	G8054.1	TACTTGGATGGGAGACCGCCTGGGAATACCGGGTGCTGTAGGCTTA	20484	8	375	142736
chr6	+	18836188	18836205	G8079.1	GTTAGCACTCTGGACTCT	42	2	2	250
chr6	+	24976994	24977032	G8081.1	TTTTATCTTAACCACCAGATCATTCCTTCTGTAGCTCAG	12	3	5	160
chr6	+	26204631	26204661	G8093.1	TTGGTGTGTTGGTCATGTCTGGTCGCGGCAA	11	2	3	78	HIST1H4E
chr6	+	26594925	26594946	G8099.1	TCATCCTTAGGTCGCTGGTTCG	6	2	5	41
chr6	+	27158126	27158162	G8103.1	TGCCGTGATCGTATAGTGGTTAGTACTCTGCGTTGTG	514	11	156	6058
chr6	+	27295433	27295468	G8104.1	GGTTCCATGGTGTAATGGTTAGCACTCTGGACTCTG	44	2	5	297
chr6	+	27519541	27519564	G8105.1	TAATGGTTAGCACTCTGGACTCTG	45	2	2	278
chr6	+	28982199	28982254	G8118.1	TCCCTGGTGGTCTAGTGGTTAGGATTCGGCGCTCTCACCGCCGCGGCCCGGGTTCG	46	2	2	330
chr6	+	30722599	30722636	G8131.1	CGACCTGCAGCTGGACCGCATCTCTGTGTACTACAATG	150	4	5	1175	TUBB
chr6	+	30723688	30723737	G8136.1	ATATCTGCTTCCGCACTCTGAAGCTGACCACACCAACCTACGGGGATCTG	47	2	7	267	TUBB
chr6	+	30723903	30723935	G8137.1	TATCGAGCTCTCACAGTGCCGGAACTCACCCAG	33	2	3	113	TUBB
chr6	+	30723989	30724076	G8138.1	ATACCTCACCGTGGCTGCTGTCTTCCGTGGTCGGATGTCCATGAAGGAGGTCGATGAGCAGATGCTTAACGTGCAGAACAAGAACAGC	53	7	13	275	TUBB
chr6	+	30724210	30724252	G8139.1	AGCAGTTCACTGCCATGTTCCGCCGGAAGGCCTTCCTCCACTG	13	2	6	68	TUBB
chr6	+	30724429	30724472	G8140.1	TTCCCTTAGCCGTCTTACTCAACTGCCCCTTTCCTCTCCCTCAG	34	5	18	442	TUBB
chr6	+	31627840	31627886	G8159.1	TCGTCATCTGAGATTTCCCTGGCAGTGGAGCGGGCCCGGCGACGGCG	18	2	3	97	PRRC2A
chr6	+	31632473	31632495	G8164.1	CCGCAAGGGGGTCTGAGGGCAAG	11	2	12	10	PRRC2A
chr6	+	31835296	31835326	G8183.1	TCGCTGATGCCATCACCGCAGCGCTCTGACC	1271	6	36	7590	C6orf48
chr6	+	31837075	31837110	G8185.1	TGGGAATGATGATTTCACAGACTAGAGTCTCCGATG	533	7	21	4511	C6orf48
chr6	+	31837114	31837141	G8185.2	GTCATGATGTCAAAACTAAGTTCTGACT	384	8	16	3310	C6orf48
chr6	+	33199601	33199632	G8192.1	GGCTGGTCCGATGGTAGTGGGTTATCAGAACT	57	2	2	475
chr6	+	33403819	33403850	G8198.1	AACTAAAACGGTGCCGTGAGAGGACTCAAACG	18	2	8	60	KIFC1
chr6	+	34245230	34245284	G8218.1	CTCTCTGGGCTTTTGGTTTGGGGGCGCCCTCTCTGCTCCTTCACTGTTCCCTCTG	132	6	21	2060	HMGA1
chr6	+	34245813	34245852	G8221.1	GTTCTGGTTCCATTTTTCCTCTGTTCACAAACTACCTCTG	15	2	3	215	HMGA1
chr6	+	34246156	34246184	G8223.1	ATTTGTCCCAGCCTGGGGCTCCCTCTCTG	29	3	5	208	HMGA1
chr6	+	36685751	36685786	G8235.1	ATTTCTACCACTCCAAACGCCGGCTGATCTTCTCCA	22	2	3	180	CDKN1A
chr6	+	36685905	36685939	G8236.1	TTTTAATTTAAACACCTCCTCATGTACATACCCTG	23	6	17	268	CDKN1A
chr6	+	36686000	36686040	G8237.1	AATGAGAGGTTCCTAAGAGTGCTGGGCATTTTTATTTTATG	15	2	2	201	CDKN1A
chr6	+	36686976	36687021	G8240.1	TCAGACATTTTAAGATGGTGGCAGTAGAGGCTATGGACAGGGCATG	34	2	2	185	CDKN1A
chr6	+	41789771	41789806	G8246.1	CCTCTATTCTGTAAAGTTCTGTACATAGTTCCCAAG	21	3	18	220	AL365205.1
chr6	+	43160743	43160788	G8255.1	ACTTCCTCAGCCCGAGGGCTGCCCTTCCAAACTCTATCGGCTGATG	15	2	2	161	PTK7
chr6	+	43752930	43752950	G8260.1	AATACTGGGTGCTGTAGGCTT	48	3	4	331
chr6	+	44232873	44232909	G8262.1	CTGCTGTGCAACATTAAGCCCCGCCGCTACCTGACTG	14	2	7	81	SLC29A1
chr6	+	44247107	44247159	G8264.1	AGTCACTCCGGCGCAGTGTTGGGACTGTCTGGGTATCGGAAAGCAAGCCTACG	95	5	8	686	HSP90AB1
chr6	+	44249384	44249436	G8265.1	ACAAGATTCGCTATGAGAGCCTGACAGACCCTTCGAAGTTGGACAGTGGTAAA	79	5	6	474	HSP90AB1
chr6	+	44249685	44249726	G8267.1	ACATCTCCATGATTGGGCAGTTTGGTGTTGGCTTTTATTCTG	17	2	4	239	HSP90AB1
chr6	+	44250297	44250352	G8270.1	AAGGAACGAGAGAAGGAAATTAGTGATGATGAGGCAGAGGAAGAGAAAGGTGAGAA	77	2	9	328	HSP90AB1
chr6	+	44250384	44250424	G8271.1	CCCAAGATCGAAGATGTGGGTTCAGATGAGGAGGATGACAG	131	2	2	173	HSP90AB1
chr6	+	44250526	44250582	G8271.2	ACATCACCCAAGAGGAGTATGGAGAATTCTACAAGAGCCTCACTAATGACTGGGAAG	86	4	6	585	HSP90AB1
chr6	+	44251087	44251123	G8272.1	CTATTTATTCCTCGTCGGGCTCCCTTTGACCTTTTTG	74	5	19	1014	HSP90AB1
chr6	+	44251433	44251452	G8273.1	TGGTTGACTCTGAGGATCTG	41	2	4	226	HSP90AB1
chr6	+	44251776	44251809	G8275.1	TCTGAGCTGCTGCGCTATCATACCTCCCAGTCTG	15	2	3	135	HSP90AB1
chr6	+	44252030	44252119	G8277.1	TTTTGTGGAGCGAGTGCGGAAACGGGGCTTCGAGGTGGTATATATGACCGAGCCCATTGACGAGTACTGTGTGCAGCAGCTCAAGGAATT	254	9	13	1403	HSP90AB1
chr6	+	44252143	44252190	G8277.2	TTACCAAGGAGGGTCTGGAGCTGCCTGAGGATGAGGAGGAGAAGAAGA	172	4	10	924	HSP90AB1
chr6	+	44253142	44253173	G8279.1	CACTTCGGGACAACTCCACCATGGGCTATATG	62	2	2	380	HSP90AB1
chr6	+	44253234	44253279	G8279.2	AAGGCTGAGGCCGACAAGAATGATAAGGCAGTTAAGGACCTGGTGG	45	2	2	167	HSP90AB1
chr6	+	44253288	44253324	G8279.3	TTTGAAACCGCCCTGCTATCTTCTGGCTTTTCCCTTG	47	2	2	371	HSP90AB1
chr6	+	44253585	44253625	G8280.1	AAGAAGTCGATTAGGTTAGGAGTTCATAGTTGGAAAACTTG	43	2	2	282	HSP90AB1
chr6	+	44253814	44253836	G8281.1	TTTATTTTATTTTCTTCATTTTG	5	2	5	80	HSP90AB1
chr6	+	52995675	52995723	G8284.1	ATTCGGCTGATCTGGCTGGCTAGGCGGGTGTCCCCTTCCTCCCTCACCG	61	5	7	673
chr6	+	52995752	52995780	G8284.2	CGCTCGGTCGAAGAGGACGACCATCCCCG	35	2	2	96
chr6	+	52995810	52995899	G8284.3	TATACGAGTAGCTGCGCTCCCCTGCTAGAACCTCCAAACAAGCTCTCAAGGTCCATTTGTAGGAGAACGTAGGGTAGTCAAGCTTCCAAG	132	7	13	1043
chr6	+	73476048	73476067	G8296.1	TTCCTCGCTGCGATCTATTG	10	2	8	71	MTO1
chr6	+	73520061	73520110	G8297.1	AATGGAAGAAAAAAACTTTGAACCACTGTCTGAGGCTTGAGAATGAACCA	2159	9	55	14607
chr6	+	80042382	80042407	G8302.1	TATATATTGTAGACTTGTTTTCTCTG	11	2	11	143	TTK
chr6	+	89084341	89084377	G8306.1	TATTATATTTTATATTTTGTAAATACTGTATACCATG	13	3	9	198	PNRC1
chr6	+	120262300	120262348	G8312.1	AGAACTTTGAAGGCCGAAGTGGAGAAGGGTTCCATGTGAACAGCAGTTG	8672	8	397	64432
chr6	+	132814977	132815026	G8316.1	CTGCTGGAGGTGTAATGGACGTTAATACTGCTTTACAAGAGGTTCTGAAG	23	4	4	164	RPS12
chr6	+	132815308	132815367	G8317.1	TTTGAATGATGACTTTAATTGTCGGATACCCCTTCACTCCTTTTATGAGTGAAACATAAG	77	3	9	803
chr6	+	132816805	132816872	G8318.1	GTACATGATGACAACTGGCTCCCTCTACTGAACTGCCATGAGGAAACTGCCATGTCACCCTTCTGATT	1270	11	88	11327
chr6	+	142218826	142218866	G8325.1	TCCATTTACTAGATTCAATCGTCTCTGAGTATATAGGGCTG	12	2	2	178	VTA1
chr6	+	151349359	151349407	G8337.1	CTTCAGAGAAGAAAAAGGAACAAGAGCCAGAAAAAGTAGACACAGAAGA	130	2	3	149	AKAP12
chr6	+	151351606	151351656	G8346.1	CAGAGGCAGAAAGACCAGAAGAGCAGGCTGAAGCGTCGGGTCTGAAGAAAG	31	2	7	89	AKAP12
chr6	+	151352155	151352193	G8349.1	TATCCATTCTGTCAAAGACTGAGGGGACTCAAGAGGCTG	32	2	2	194	AKAP12
chr6	+	151352311	151352352	G8349.2	AAGGGACAGAAGAAGCTGAATGTAAAAAGGATGATGCTCTTG	56	2	2	288	AKAP12
chr6	+	151352626	151352672	G8351.1	TTCAGAGCTCTGAGGCATCATTCACTCTAACAGCGGCTGCAGAGGAG	16	2	2	118	AKAP12
chr6	+	151353138	151353174	G8354.1	ATAAAAGCTGACAGCCAGGACGCTGGACAGGAAACGG	73	3	17	168	AKAP12
chr6	+	151356069	151356113	G8361.1	TTTTAAGTAGTCCTCCTGTATCTATTGTATATTTTTTTCTTAATG	76	14	80	1556	AKAP12
chr6	+	151356556	151356594	G8362.1	AAAAGAATTGTTGTAAGTTTTTGATTCTACTCTTATATG	15	3	7	214	AKAP12
chr6	+	151358268	151358299	G8363.1	TAAACTCTCACCACTTCTTGTAATATCAAATG	10	2	5	101	AKAP12
chr6	+	154190333	154190354	G8364.1	AAAATTAATAAATTCTGAGCAG	308	6	29	1819	OPRM1
chr6	-	17721785	17721805	G8401.1	AATACCGGGTGCTGTAGACTT	139	3	3	818
chr6	-	26031745	26031778	G8410.1	GAGGCTTGTGAGGCCTACTTGGTAGGGCTCTTTG	17	2	6	151	HIST1H3B
chr6	-	26031782	26031828	G8410.2	ACTTCAAGACCGATCTTCGCTTCCAGAGCTCTGCGGTGATGGCGCTG	124	7	12	1222	HIST1H3B
chr6	-	26031890	26031938	G8411.1	TTACCGCCCGGGCACTGTGGCTCTGCGCGAGATCCGCCGCTACCAAAAG	137	3	6	834	HIST1H3B
chr6	-	26305487	26305505	G8430.1	AATCCCATCCTCGTCGCTC	10	2	6	44
chr6	-	26311232	26311249	G8431.1	TTAGCACTCTGGACTTTG	33	2	4	227
chr6	-	26311783	26311800	G8432.1	TTAGCACTCTGGACTTTG	23	3	5	156
chr6	-	27892738	27892770	G8460.1	CTAAGGGCAAGTAAGGGCTGAACTTTAAAAATG	18	2	3	102	HIST1H2AM
chr6	-	27892786	27892822	G8460.2	CCTAACATCCAGGCCGTACTGCTCCCCAAGAAGACTG	88	2	7	345	HIST1H2AM
chr6	-	27902946	27902977	G8464.1	CATTGGTGGTTCAGTGGTAGAATTCTCGCCTG	352	7	7	3864
chr6	-	28941637	28941672	G8468.1	GGTTCCATGGTGTAATGGTTAGCACTCTGGACTCTG	151	4	6	966
chr6	-	28943638	28943659	G8469.1	TCTCTTCGGGGGCGTGGGTTCG	242	2	5	1687
chr6	-	31536371	31536413	G8491.1	TGCAAGGACGACTCTTATCTATCACCCATGACTGATGGCTCTG	90	5	59	839	DDX39B
chr6	-	31641899	31641928	G8495.1	CTTTCTCTTCTGTGCCAGAACTTCTCTATG	40	3	4	474	BAG6
chr6	-	31792990	31793034	G8513.1	TCTGGCTGACCTGGCGGCTGTCACAGCCTTGCTGCTGCCTTTCCG	11	2	2	141	VARS
chr6	-	33417521	33417547	G8532.1	TTCCGGGCTCGGTCTCTGCAGCCTTTG	21	2	5	184	CUTA
chr6	-	35834305	35834345	G8537.1	CTTTCATGTACAGCTTTTTCTTTACCTTACCCAAAATTCTG	13	4	9	149	SRPK1
chr6	-	36975659	36975705	G8540.1	CTCCATTGGGAAGATTTTCAAAGAGGAAGGGCTGCTGGGATTCTTCG	10	2	2	116	MTCH1
chr6	-	46015860	46015877	G8557.1	TTGGCGGCGGCGGGATCG	37	2	40	71	CLIC5
chr6	-	50913169	50913205	G8559.1	GCCGCCATCAACCGCCAGATCAACCTGGAGCTCTACG	24	2	2	85
chr6	-	53498468	53498507	G8572.1	CTTGTACATTTTTAAATTCTTACTCTGGAGCAACCTACTG	19	3	7	236	GCLC
chr6	-	68665180	68665210	G8574.1	TTACTAGAGAAGTTTCTCTGAACGTGTAGAG	20	2	3	189
chr6	-	71377002	71377025	G8577.1	TGTAAACATCCTACACTCTCAGCT	30	2	2	198
chr6	-	73518438	73518478	G8582.1	CTCTTCCTGGGGACAATGTGGGCTTCAATGTCAAGAATGTG	30	2	2	243	EEF1A1
chr6	-	73518560	73518585	G8583.1	AGTGGAGACTGGTGTTCTCAAACCCG	31	2	2	106	EEF1A1
chr6	-	73518733	73518795	G8584.1	AACCACGCTGCTTGAGGCTCTGGACTGCATCCTACCACCAACTCGTCCAACTGACAAGCCCTT	119	3	4	669	EEF1A1
chr6	-	73519355	73519379	G8587.1	ACACAGAGACTTTATCAAAAACATG	154	3	3	755	EEF1A1
chr6	-	73519935	73519977	G8589.1	ATTCGGGCAAGTCCACCACTACTGGCCATCTGATCTATAAATG	116	2	2	757	EEF1A1
chr6	-	73520230	73520265	G8590.1	AGTTCTCGAGCTTTTGGAGTACGTCGTCTTTAGGTT	397	9	21	3974	EEF1A1
chr6	-	73521080	73521114	G8595.1	AAGTGATGTCGTGTACTGGCTCCGCCTTTTTCCCG	101	4	4	1200	EEF1A1
chr6	-	75237942	75237965	G8596.1	CTGGCTGTGGCTTCATTTCCCAAG	15	2	2	118	COX7A2
chr6	-	75473834	75473863	G8599.1	TGGTTTTCCCAGGGCGAGGCTCATCCATTG	14	2	5	111
chr6	-	85677293	85677368	G8607.1	TATCTGTGATGATCTTATCCCGAACCTGAACTTCTGTTGAAAAAAAAAAACTTTTACGGATCTGGCTTCTGAGATG	728	20	55	7302	SNHG5
chr6	-	85677585	85677659	G8608.1	TAATCAATGATGAAACCTATCCCGAAGCTGATAACCTGAAGAAAAATAAGTACGGATTCGGCTTCTGAGATTAAG	876	12	39	6626
chr6	-	96891038	96891059	G8616.1	CTGTATATTTTCTCATTTTTTG	22	3	20	288	NDUFAF4
chr6	-	103886944	103886963	G8621.1	GTGGCATTGCTGGGTGGCTA	16	2	31	65
chr6	-	110614294	110614318	G8632.1	CATGTGTTCCATTGTGACTTCTCTG	11	3	3	118	CDK19
chr6	-	113943440	113943486	G8633.1	ATAGCTTGTGATGAAGAATTCTCAGATTCTGAGGATGAAGGAGAAGG	13	2	12	126	HDAC2
chr6	-	125780263	125780295	G8639.1	ATTCGGCGCTCTCACCGCCGCGGCCCGGGTTCG	126	2	3	461	AL592295.3
chr6	-	144370887	144370930	G8646.1	AAGGGCAAAAGCTCACTTGATCTTGATTTTCAGTACGAATACAG	218	7	8	1841
chr6	-	144370949	144370980	G8647.1	CAGGTGTCTTAAGGTGAGCTCAGGGAGGACAG	18	2	11	81
chr6	-	152970602	152970621	G8652.1	TATACATGTAAATATTTCTG	13	3	6	111	FBXO5
chr6	-	158769812	158769833	G8664.1	AGGAGCTGGAGAGACAGGCGGT	40	2	3	55	EZR
chr6	-	158770785	158770821	G8665.1	GAGGAGTTGATGCTGCGGCTGCAGGACTATGAGGAGA	237	5	16	1042	EZR
chr6	-	158785328	158785381	G8671.1	CCAAGTTTGGGGACTACAACAAAGAAGTGCACAAGTCTGGGTACCTCAGCTCTG	66	4	6	344	EZR
chr6	-	158787140	158787185	G8674.1	CTCCGGGAAGTGTGGTACTTTGGCCTCCACTATGTGGATAATAAAG	41	4	7	358	EZR
chr6	-	158818103	158818129	G8675.1	TTTTCGGGGATCGAGGATACTCACCAG	20	2	3	131	EZR
chr7	+	193099	193139	G8686.1	ATGGACCTTGACCCGCGAGGCGGCGCCGCGCTCGTGCCCAG	11	3	15	40	FAM20C
chr7	+	873350	873371	G8690.1	TTGTACATTTTTGTATATACTG	23	2	3	138	SUN1
chr7	+	2362724	2362753	G8693.1	CAGCACACATTCCGGGTCAACCTCTTTACG	27	2	2	187	EIF3B
chr7	+	5606575	5606595	G8715.1	TCATTTGTATAACTCTAAACG	23	3	22	158	FSCN1
chr7	+	22856613	22856646	G8723.1	TGGCCAAGGATGAGAACTCTAATCTGATTTTATG	719	10	46	7515
chr7	+	22856649	22856686	G8723.2	CTTCTGCTGTGATGGATTAAAGGATTTACCTGAGGCCA	292	8	39	2686
chr7	+	26213276	26213314	G8727.1	TTATCCAACTGTATATTGTTTACTTTATTGTAAATACTG	69	4	69	1078	CBX3
chr7	+	48632772	48632795	G8747.1	ATTTGGTGTATGTGCTTGGCTGAG	194	3	4	1681	ABCA13
chr7	+	55645850	55645889	G8751.1	TCAGGTCCTTTTGGCCAGATCTTTAGACCAGACAACTTTG	13	3	5	144
chr7	+	56080052	56080090	G8754.1	CTTTCTTTGTGGCCTCATCTGTGGTTTCGTGTCCCTCTG	16	2	2	216	SUMF2
chr7	+	69062413	69062461	G8756.1	GCGGGTGTTGACGTGATGTGATTTCTGCCCAGTGCTCTGAATGTCAAAC	1368	14	149	15393
chr7	+	69062477	69062528	G8757.1	AAATGCGGGTAAACGGCGGGAGTAACTATGACTCTCTTAAGGTAGCTAAATG	5369	10	134	34855
chr7	+	69062543	69062580	G8757.2	TAGTGACGCGCATGAATGGATGAACGGGATTCCCACTG	253	6	9	1149
chr7	+	69062617	69062708	G8758.1	AACGGGCTTGGTGGAATCAGCGGGGAAAGAAGACCCTGTTGAGTTTGACTCTAGTCTGGCATGGTGAAGAGACACGAGAGGTGTAGAATAAG	882	10	56	3998
chr7	+	73832629	73832669	G8760.1	CTATTCATCACTGTAATTATTATTATTTTCTACAATAAATG	29	6	25	490	CLDN4
chr7	+	74404645	74404687	G8766.1	CCCAGGGCAGAGGCAGCTCAGAGTGGAGGCTCTAGGCAGGTTT	13	3	3	88	CLIP2
chr7	+	75943878	75943916	G8768.1	TCTCCTGTGGCTCAGTCTTATTTCATACCTGCAACATCT	23	2	2	295
chr7	+	75986802	75986826	G8770.1	TGTAAATAATTTTAAATAACCTCTG	23	4	20	205	POR
chr7	+	80094525	80094543	G8776.1	TGTGGAACTAGGTGTGAAT	19	2	32	69
chr7	+	98185059	98185094	G8778.1	CCCTGCGGAATTGTTTTCTCACCTCCGACTTAAATG	12	2	13	131	LMTK2
chr7	+	100678743	100678787	G8800.1	ACGATGGCATGGCTGTGGCCACGGGCTCCTGGGACTCCTTCCTCA	21	2	3	163	GNB2
chr7	+	101160866	101160902	G8811.1	TCCTTCCCTCCCTAATAACTGTAAATATATAAATATG	42	4	40	506	AP1S1
chr7	+	103312365	103312392	G8817.1	AATTAAATACTGTATCATACTTTCAAAG	41	6	43	367	PMPCB
chr7	+	105244741	105244780	G8821.1	CGGGCGTCTGACCAAACACACCAAGTTTGTGCGGGACATG	20	2	9	71
chr7	+	105325852	105325871	G8822.1	TTGGTGTATGTGCTTGGCTG	76	2	2	569
chr7	+	116258745	116258768	G8825.1	ATATGTATATTACTCAAAATAAAG	37	3	37	259	TES
chr7	+	128771351	128771373	G8836.1	TTCTGTGAATGCTAGCTCTCTTG	13	2	3	127	CALU
chr7	+	132753090	132753123	G8846.1	CCAATGCAAGGACTTGTCATAGTTACACTGACTG	789	8	40	6314
chr7	+	135648679	135648707	G8849.1	ACATCTTTTCTGTAAACTTCTTCCCCTAG	16	2	17	175	NUP205
chr7	+	143390619	143390651	G8857.1	CTGCTTCCCCCTGGACGGTCACGTGCTCTGTCG	30	2	4	185	ZYX
chr7	+	145997344	145997389	G8858.1	CACCCAACTTACACTTAGGAGATTTCAACTTAACTTGACCGCTCTG	903	9	48	8250
chr7	+	148983755	148983790	G8863.1	GGCTGGTCCGAGTGCAGTGGTGTTTACAACTAATTG	14	2	3	151
chr7	+	149310190	149310222	G8865.1	GGGGGCATAGCTCAGTGGTAGAGCATTTGACTG	68	2	4	536
chr7	-	1478843	1478869	G8884.1	ACACCGGCTTCTCCTCGCTCTTCCTGA	10	2	2	78	INTS1
chr7	-	5528402	5528442	G8910.1	AGAAGCTGTGCTACGTCGCCCTGGACTTCGAGCAAGAGATG	176	3	4	917	ACTB
chr7	-	5528512	5528548	G8910.2	GACCTGGCTGGCCGGGACCTGACTGACTACCTCATGA	142	3	6	739	ACTB
chr7	-	5528617	5528665	G8911.1	CTATCCCTGTACGCCTCTGGCCGTACCACTGGCATCGTGATGGACTCCG	132	2	4	978	ACTB
chr7	-	5529247	5529307	G8912.1	CACGGCATCGTCACCAACTGGGACGACATGGAGAAAATCTGGCACCACACCTTCTACAATG	130	3	5	687	ACTB
chr7	-	5529610	5529653	G8913.1	ATGATGATATCGCCGCGCTCGTCGTCGACAACGGCTCCGGCATG	123	4	4	735	ACTB
chr7	-	22090401	22090428	G8922.1	AAGGGCAGGGCGCCCTGGAATGGGTTTG	907	3	11	4524
chr7	-	22511067	22511096	G8925.1	CTCTTCCTGGGGACAATGTGGGCTTCAATG	21	2	3	172
chr7	-	22511301	22511333	G8926.1	CCAGTGGAACCACGCTGCTTGAGGCTCTGGACT	71	2	3	290
chr7	-	25123324	25123356	G8934.1	TTATGTGAATATATTTAAATACTGGGGAAATTG	19	3	10	201	CYCS
chr7	-	26197353	26197385	G8940.1	CTGCCATGGCTGCAAGACCTCATTCAATTGATG	17	2	2	117	HNRNPA2B1
chr7	-	44115868	44115893	G8955.1	ATTTTTGGGGACATCAGGACAGAACG	60	2	2	358	POLD2
chr7	-	44985429	44985458	G8958.1	TGCTTGCTAGAACAGTTTTGAAACGGTTTG	44	2	2	408	SNHG15
chr7	-	76329125	76329172	G8975.1	TACTTTCTATCTCATCTGTCTCGGCTCTGCATGTTTTCCAGGGTGTAG	13	3	11	180	YWHAG
chr7	-	99029075	99029099	G8989.1	TTAATTTCTGGGCTGCTGAGGTTCT	11	2	13	108	SMURF1
chr7	-	100093571	100093592	G8993.1	CATTGCACTTGTCTCGGTCTGA	48	2	3	379
chr7	-	100093606	100093630	G8994.1	AGGCGGAGACTTGGGCAATTGCTGG	17	2	16	69
chr7	-	100093815	100093837	G8995.1	CAAAGTGCTGTTCGTGCAGGTAG	30	2	2	178
chr7	-	100098209	100098255	G9004.1	TATCACGGTGCTGGTAGAAGGAGAGAACACAAGGATTGCCCAGCCTG	26	2	2	136	MCM7
chr7	-	100822462	100822508	G9014.1	CACCTCTTCTACAAAAAGTGCGCCCAGCTGACTGTGAACCTGACTCG	24	2	7	135	EPHB4
chr7	-	101208913	101208944	G9018.1	TGTACTGGTTCCCACTGCTGTCAGAACAAATG	21	2	9	141	PLOD3
chr7	-	121350448	121350465	G9023.1	ACTAATGGAAATGTGGAG	33	2	2	130	FAM3C
chr7	-	123684435	123684453	G9025.1	ATTCTGTAAAATTATCATG	26	3	26	182	WASL
chr7	-	128912973	128912998	G9030.1	AAGAACTCCTTCACCGTGGACTGCAG	12	2	2	58
chr7	-	129770445	129770470	G9033.1	TTTGGCAATGGTAGAACTCACACTGG	46	3	22	298
chr7	-	129830750	129830776	G9035.1	AAAACTGTAAACTTTTTTAAATAAACG	15	3	15	120	UBE2H
chr7	-	130876748	130876769	G9039.1	TAGCACCATCTGAAATCGGTTA	46	3	7	266
chr7	-	133035695	133035742	G9046.1	CATTTGAGGGTGATGATGGATTCTGTGTGTTTGAGAGCAACGCCATTG	21	3	5	226
chr7	-	133035890	133035930	G9047.1	CGGAATCACCATGGCGGCTGGGACCCTGTACACGTATCCTG	155	3	5	825	CHCHD3
chr7	-	140386777	140386810	G9055.1	ACTGCCTGGGAATACCGGGTGCTGTAGGCTTTAA	604	9	22	4934	SLC37A3
chr7	-	148987153	148987194	G9064.1	ATCGAACTCCTTGTTCTACTCTTTCCCCCCTTCTCACTACTG	62	3	4	734
chr7	-	148987216	148987248	G9065.1	GGCTGGTCCGAAGGTAGTGAGTTATCTCAATTG	103	4	5	944
chr8	+	21598464	21598486	G9090.1	ATCGTTTTTTCACTGACCCGGTG	140	2	2	1243
chr8	+	26136969	26137001	G9110.1	ACTGCCTGGGAATACTGGGTGCTGTAGGCTTAA	253	5	38	1966
chr8	+	33513542	33513589	G9118.1	AACCTTGTTACGACGTGGGCACATTACCCGTCTGACCTGAACTTCAAG	27	3	4	183
chr8	+	43126655	43126691	G9123.1	CACTGTAATATATATTATCCCATTCTCTCCTGACCTG	26	3	31	317
chr8	+	47970544	47970583	G9127.1	AAGGATTTTAGTCACACTGGAAGGGGCAAATTTCGGGCTG	21	2	2	136	MCM4
chr8	+	63186784	63186833	G9134.1	TGGGAATTGGGGGTTCTGCTGTACCACCACCTCCTATAAAACACAACATG	14	2	2	166	YTHDF3
chr8	+	78717663	78717692	G9139.1	TGTACATATACTGTATATAATAAATATCTG	37	3	15	371	ZC2HC1A
chr8	+	90511215	90511241	G9144.1	CCTGGGAATACCGGGTGCTATAGGCTT	136	2	3	916	LINC00534
chr8	+	97719044	97719070	G9151.1	TATAGGACACAGAAGAATTAGAAAAAG	14	2	28	28	MTDH
chr8	+	101041228	101041252	G9154.1	CAGGGTCGGGCCTGGTTAGCACTTG	26	3	4	150
chr8	+	101570339	101570386	G9155.1	AAATTTCGGAGTGCTTCAGTTGGGGCTGAGGAGTACATGTATGATCAG	12	2	2	166	GRHL2
chr8	+	103768514	103768547	G9157.1	TAAGGGGCATTCCTGTTACAGACCAAGGAGAACT	22	2	6	125
chr8	+	108486829	108486872	G9158.1	TCTCTTCATATCACATATACATGTATATATATAAAACTCTAATG	35	3	35	542	EMC2
chr8	+	116281947	116281988	G9159.1	TTAGCTCAAGCGGTTACCTCCTCATGCCGGACTTTCTATCTG	21	2	2	250
chr8	+	124487780	124487825	G9165.1	TTTACTGTGATGTGCTACTGTAAATATACCTCTTTAATTACTTCTG	36	9	43	614	RNF139
chr8	+	127741215	127741261	G9175.1	TTTCTCTGTAAATATTGCCATTAAATGTAAATAACTTTAATAAAACG	19	5	15	199	MYC
chr8	+	132013148	132013183	G9177.1	CTATATTTTTGTAGATAAATAAAACTCAATAAATTG	19	5	19	231	EFR3A
chr8	+	143297947	143297981	G9183.1	TTATTTCCTGTAAAATATTTTCATTTTTTAAAATG	11	3	6	182	ZNF696
chr8	+	144360389	144360428	G9197.1	CTTTTCCTGCTTACCCTACGGGCGTCTGGCCTACCACCTG	10	2	2	108	SLC52A2
chr8	-	23188678	23188702	G9217.1	AATTATATGGCAAGGGGACTCACTG	11	2	2	64
chr8	-	42417586	42417614	G9238.1	CTAACTTAACTACTGTACATAATAATATG	18	2	16	164	SLC20A2
chr8	-	55842642	55842664	G9259.1	ATCGTCCGACCTGGGTATAGGGG	778	3	7	3881
chr8	-	55902723	55902758	G9260.1	CATATTGCAGTGGTGACAATGAGACCTGTAACATTT	40	2	4	417
chr8	-	55909427	55909454	G9261.1	CTGCCATCTGTGGGATTATGACTGAACA	577	4	15	3930
chr8	-	56073837	56073871	G9262.1	TAACGGTGATAATTTTATACGCTATTCTGAGCCAG	61	3	3	685
chr8	-	66922512	66922550	G9272.1	CACAATGATGACTTAAATTACTTTTTGCCGTTTACCCAG	11	2	2	143
chr8	-	69690064	69690183	G9273.1	AAACCACAGCCAAGGGAACGGGCTTGGCGGAATCAGCGGGGAAAGAAGACCCTGTTGAGCTTGACTCTAGTCTGGCATGGTGAAGAGACATGAGAGGTGTAGAATAAGTGGGAGGCCCCT	221916	13	1232	816341	SLCO5A1
chr8	-	69690184	69690285	G9273.2	TAACTATGACTCTCTTAAGGTAGCCAAATGCCTCGTCATCTAATTAGTGACGCGCATGAATGGATGAACGAGATTCCCACTGTCCCTACCTACTATCCAGCG	10489	16	106	67137	SLCO5A1
chr8	-	69690323	69690377	G9274.1	CCCGCGGCGGGTGTTGACGCGATGTGATTTCTGCCCAGTGCTCTGAATGTCAAAT	399212	15	6798	4005129	SLCO5A1
chr8	-	81840030	81840075	G9284.1	ATTCCTAAGAAGAAAATAATGGATTGCATATTAGTTGTTCTCTAAG	12	2	24	168	SNX16
chr8	-	100717810	100717875	G9300.1	AAAATGGTTCCAAGGGCTATGGATTTGTACACTTTGAGACGCAGGAAGCAGCTGAAAGAGCTATTG	89	5	11	879	PABPC1
chr8	-	100718143	100718181	G9301.1	TAGGCAACATATTCATTAAAAATCTGGACAAATCCATTG	12	2	7	119	PABPC1
chr8	-	100721692	100721724	G9307.1	TTTTCAATTCCGGTTGATTTTTGTCCCTCTGCG	28	2	5	442	PABPC1
chr8	-	123157258	123157284	G9321.1	GTAGCGCGTCAGTCTCATAATCTGAAG	80	2	3	545
chr8	-	123369901	123369937	G9323.1	ATGATGATGATGATGATGAAGATGATGAAGATGAAGA	31	2	4	243	ATAD2
chr8	-	133238846	133238888	G9328.1	TCTCCTGCTAGGCGGCCTGCCCAGCTGCCGCCCCCGGACTCTG	13	2	2	62	NDRG1
chr8	-	134804917	134804940	G9331.1	TGTAAACATCCCCGACTGGAAGCT	76	2	15	352
chr8	-	135773773	135773800	G9332.1	TGGGGGGCCCAAGTCCTTCTGATCGAGG	136346	6	1321	733284
chr8	-	140732587	140732607	G9336.1	CTAGACTGAAGCTCCTTGAGG	53	2	2	263
chr8	-	143818468	143818496	G9371.1	CCGCGTCTACGTGGGCTCTATCTACTATG	10	2	2	88	PUF60
chr8	-	143916792	143916814	G9381.1	TCAACAAGGGCCTGGTGGACAAG	12	2	2	34	PLEC
chr8	-	143931948	143931982	G9419.1	CTGCTGTATCGAGGCACACCTGAAGGAGAACGCTG	85	3	3	333	PLEC
chr8	-	144789784	144789809	G9453.1	AACTAGTGCTGAGGGCCTCAATAAAG	79	2	2	275	RPL8
chr8	-	144789822	144789874	G9453.2	TGGGTCTCATTGCTGCCCGCCGGACTGGACGTCTCCGGGGAACCAAGACTGTG	258	5	11	1650	RPL8
chr9	+	9442110	9442206	G9460.1	GCTGGAGGATCGCTTGAGTCCAGGAGTTCTGGGCTGTAGTGCGCTATGCCGATCGGGTGTCCGCACTAAGTTCGGCATCAATATGGTGACCTCCCGG	145	10	14	1377
chr9	+	33034258	33034300	G9467.1	ACCAAGAACCAGGACTGGAGCCAGGCGATATTATCATTGTGTT	23	2	2	197	DNAJA1
chr9	+	33624263	33624299	G9471.1	CTTCCTTCAAAATGTCTACTGTTCACGAAATCCTGTG	18	2	3	177
chr9	+	33624374	33624400	G9472.1	ATGCTGAGCGGGATGCTTTGAACATTG	10	2	3	77
chr9	+	33658757	33658786	G9475.1	AAGACCCTATGGAGCTTTAATTTATTAATG	27	2	2	293
chr9	+	34252038	34252066	G9477.1	TTAACACTGGTTCTGCAATATCTCTGAGG	10	3	11	86	UBAP1
chr9	+	64048204	64048238	G9490.1	ACGTTAGGTCAAGGTGTAGCCCATGAGGTGGCAAG	56	2	2	387	AC097374.1
chr9	+	76571748	76571804	G9496.1	CGGAGCCTCGGTTGGCCTCGGATAGCCGGTCCCCCGCCTGTCCCCGCCGGCGGGCCG	682	8	20	3606
chr9	+	76571907	76571963	G9497.1	CACGTTCGTGGGGAACCTGGCGCTAAACCATTCGTAGACGACCTGCTTCTGGGTCGG	10628	12	328	65387
chr9	+	76571997	76572034	G9498.1	CGATCTATTGAAAGTCAGCCCTCGACACAAGGGTTTGT	295	3	8	1796
chr9	+	79494323	79494341	G9499.1	ATATATTGTGAGTTCGATG	16	2	32	96
chr9	+	88478613	88478642	G9503.1	TTAATTCTGTAAGTAATTTTTATAATTATG	14	5	14	188	SPIN1
chr9	+	94175962	94175983	G9512.1	TGAGGTAGTAGGTTGTATAGTT	55	2	12	480
chr9	+	94176353	94176373	G9513.1	TGAGGTAGTAGATTGTATAGT	77	4	9	604
chr9	+	94178841	94178861	G9514.1	AGAGGTAGTAGGTTGCATAGT	31	3	6	180
chr9	+	94460696	94460729	G9516.1	ATGGGGTGCTGTGTAAATCTTGTATTTATAAATG	39	5	39	507	MFSD14B
chr9	+	97658666	97658696	G9519.1	ATATTGTTCCTCCTACCTTCTCAGCTCTGTG	13	2	14	155	NCBP1
chr9	+	99230351	99230383	G9522.1	TATTGGTTATGAGTCTTCTGTTCATCGCTTCTG	15	2	2	220	SEC61B
chr9	+	100731874	100731901	G9523.1	AAGCTGTGCTACGTCGCCCTGGACTTCG	20	2	4	117
chr9	+	124033056	124033083	G9534.1	TTCATTTTTCTCTCCCTCTTTTTCTCTG	10	4	15	115	LHX2
chr9	+	130887589	130887608	G9568.1	TTTCTGTATATGATTCTCTG	10	2	10	100	ABL1
chr9	+	131485688	131485719	G9574.1	ATCCTTCTGACCCTCCACTGTGGACTCAATAG	39	2	2	284
chr9	+	133019535	133019603	G9581.1	ATTCGGGCAAGTCCACCACTACTGGCCATCTGATCTATAAATGCGGTGGCATCGACAAAAGAACCATTG	68	4	10	463
chr9	+	133019634	133019674	G9581.2	GAAAGGGCTCCTTCAAGTATGCCTGGGTCTTGGATAAACTG	19	2	2	174
chr9	+	133019934	133019960	G9583.1	TCGGTGTTAACAAAATGGATTCCACTG	9	2	2	52
chr9	+	133020139	133020185	G9584.1	TAAGGATGGCAATGCCAGTGGAACCACGCTGCTTGAGGCTCTGGACT	25	3	4	127
chr9	+	133020518	133020557	G9586.1	ATTATCCTGAACCATCCAGGCCAAATAAGCGCCGGCTATG	19	3	10	137
chr9	+	133020735	133020765	G9587.1	ACTATCCACCTTTGGGTCGCTTTGCTGTTCG	7	2	2	62
chr9	+	133350498	133350522	G9592.1	CGAATCCATGAGCTTTTTAACCCTG	64	2	5	507
chr9	+	133351370	133351404	G9595.1	TACACTGTTGAGTTTTCTGTACATAAAAATAATTG	15	3	13	162	RPL7A
chr9	-	14433976	14434012	G9627.1	TGCCGTGATCGTATAGTGGTTAGTACTCTGCGTTGTG	1372	9	137	16535
chr9	-	19200878	19200912	G9635.1	GAAGGGTTATGTGGTCCGAATCAGTGGTGGGAACG	13	3	4	90
chr9	-	19378789	19378823	G9638.1	TAAGGGGCATTCCTGTTACAGACCAAGGAGAACTG	54	2	2	261	RPS6
chr9	-	19379497	19379518	G9640.1	TTGCTGCTGACGCTCTGGGTGA	182	3	3	1175	RPS6
chr9	-	33934301	33934330	G9645.1	TATGTGTGGACAGCACTGAGACTGAGTCTT	71	2	2	622	UBAP2
chr9	-	35657972	35658019	G9663.1	TGGTTCGTGCTGAAGGCCTGTATCCTAGGCTACACACTGAGGACTCTG	45	3	3	382	RMRP
chr9	-	38068328	38068352	G9683.1	GCCTGGCTCGTCGCTGCGCAAACTG	11	2	2	53	AL138752.2
chr9	-	83663969	83664016	G9689.1	AAGCACTGGAGGCTCTTCGGGAACTAATGGATCTAACGCCACACCTAG	23	2	2	175	UBQLN1
chr9	-	83968375	83968403	G9691.1	TTAAACTTTGTAAAATATATATATACTTG	10	4	11	119	HNRNPK
chr9	-	83972057	83972108	G9698.1	TTTGATGACCGTCGCGGACGCCCAGTGGGATTTCCCATGCGGGGAAGAGGTG	68	4	4	538	HNRNPK
chr9	-	92223405	92223452	G9708.1	AAAAACACTTTGTGTGACTGCAGGATCGGCTCCCTCTCTGATCAACAG	17	4	4	161	IARS
chr9	-	92292514	92292541	G9711.1	ATGGGCCATAGCAATCCTGTGATTTATG	107	2	2	961
chr9	-	111373373	111373405	G9719.1	TAAACTTATGAGTGCTTTGCTGAGTGGCCTGAC	19	2	2	197	KIAA0368
chr9	-	121340840	121340884	G9725.1	AACCTGGGCTGTAACTGCCACCTGACACCGCTGACTGGCTAAATG	13	2	4	113	STOM
chr9	-	121519741	121519778	G9726.1	CATTTAACCCCCCTGTACACAACTCACTCCTTTTAAAG	12	3	8	120	THSD4-AS1
chr9	-	125236528	125236580	G9735.1	CTAGTGCTGTAATATTGTAAATACTGGACTCAGGAACTTTTGTTAGGAAAAAA	19	3	12	194	HSPA5
chr9	-	125236897	125236941	G9737.1	AAAGGATGGTTAATGATGCTGAGAAGTTTGCTGAGGAAGACAAAA	49	2	2	362	HSPA5
chr9	-	125238941	125238987	G9741.1	ACTTTTCTGAGACCCTGACTCGGGCCAAATTTGAAGAGCTCAACATG	20	3	3	160	HSPA5
chr9	-	125239155	125239188	G9743.1	ATACTCATCTGGGTGGAGAAGACTTTGACCAGCG	21	2	2	166	HSPA5
chr9	-	125239484	125239517	G9745.1	TTACTGTACCAGCCTATTTTAATGATGCCCAACG	39	3	5	382	HSPA5
chr9	-	125240250	125240272	G9746.1	ATATTGGAGGTGGGCAAACAAAG	43	2	6	166	HSPA5
chr9	-	128634341	128634366	G9770.1	CTGGGACTGACGGGCATGTCCACCTG	13	2	3	58	WDR34
chr9	-	128640751	128640796	G9773.1	CTTTCTTCGGAGAGTGGAGGCCATGGTCATCCGAGAGCTGAACAAG	13	2	14	78	WDR34
chr9	-	129720538	129720556	G9784.1	GGGGACCCAAGTCCTTCTG	80	2	2	318
chr9	-	136448131	136448157	G9797.1	AATCCTGGTTCTTTCGTTGGCTACCTG	18	2	2	196	SEC16A
chr9	-	136726104	136726142	G9803.1	AACCAGTGGGCACTGAGAATGGTTTATGGCCTGACATTA	76	3	4	738
chr9	-	136726747	136726783	G9805.1	CCCCGTGAACGTTTGAATGTTTGATAGTCTCACACTC	120	3	14	1353
chrM	+	578	611	G9824.1	TTTATGTAGCTTACCTCCTCAAAGCAATACACTG	899	7	21	5443
chrM	+	649	697	G9825.1	ATAGGTTTGGTCCTAGCCTTTCTATTAGCTCTTAGTAAGATTACACATG	156	13	24	2238
chrM	+	702	748	G9825.2	CATCCCCGTTCCAGTGAGTTCACCCTCTAAATCACCACGATCAAAAG	625	5	31	3319
chrM	+	946	1076	G9826.1	TTTTAGATCACCCCCTCCCCAATAAAGCTAAAACTCACCTGAGTTGTAAAAAACTCCAGTTGACACAAAATAGACTACGAAAGTGGCTTTAACATATCTGAACACACAATAGCTAAGACCCAAACTGGGAT	1479	17	74	9967
chrM	+	1114	1147	G9827.1	TTAAATCAACAAAACTGCTCGCCAGAACACTACG	107	4	5	570
chrM	+	1148	1297	G9827.2	AGCCACAGCTTAAAACTCAAAGGACCTGGCGGTGCTTCATATCCCTCTAGAGGAGCCTGTTCTGTAATCGATAAACCCCGATCAACCTCACCACCTCTTGCTCAGCCTATATACCGCCATCTTCAGCAAACCCTGATGAAGGCTACAAAG	790	21	86	6644
chrM	+	1316	1355	G9827.3	TAAAGACGTTAGGTCAAGGTGTAGCCCATGAGGTGGCAAG	86	3	4	557
chrM	+	1441	1538	G9828.1	AGTAGAGTGCTTAGTTGAACAGGGCCCTGAAGCGCGTACACACCGCCCGTCACCCTCCTCAAGTATACTTCAAAGGACATTTAACTAAAACCCCTACG	3497	17	177	22487
chrM	+	1539	1569	G9828.2	CATTTATATAGAGGAGACAAGTCGTAACATG	1410	7	30	6499
chrM	+	1624	1669	G9829.1	CACCCAACTTACACTTAGGAGATTTCAACTTAACTTGACCGCTCTG	884	10	50	8015
chrM	+	1671	1709	G9829.2	GCTAAACCTAGCCCCAAACCCACTCCACCTTACTACCAG	233	6	16	1154
chrM	+	1859	1911	G9830.1	AATTAACTAGAAATAACTTTGCAAGGAGAGCCAAAGCTAAGACCCCCGAAACC	120	4	6	392
chrM	+	2064	2108	G9830.2	AACCCTCTAAATCCCCTTGTAAATTTAACTGTTAGTCCAAAGAGG	79	5	9	514
chrM	+	2204	2249	G9832.1	TTCAAGCTCAACACCCACTACCTAAAAAATCCCAAACATATAACTG	142	4	16	1028
chrM	+	2340	2366	G9833.1	CCTGCGTCAGATTAAAACACTGAACTG	196	2	4	925
chrM	+	2367	2421	G9833.2	ACAATTAACAGCCCAATATCTACAATCAACCAACAAGTCATTATTACCCTCACTG	68	2	4	541
chrM	+	2479	2528	G9833.3	CAAATCTTACCCCGCCTGTTTACCAAAAACATCACCTCTAGCATCACCAG	146	6	10	1125
chrM	+	2561	2596	G9833.4	TTTAACGGCCGCGGTACCCTAACCGTGCAAAGGTAG	81	3	4	389
chrM	+	2609	2714	G9833.5	TTCCTTAAATAGGGACCTGTATGAATGGCTCCACGAGGGTTCAGCTGTCTCTTACTTTTAACCAGTGAAATTGACCTGCCCGTGAAGAGGCGGGCATAACACAGCA	914	8	13	2575
chrM	+	2725	2751	G9833.6	ACCCTATGGAGCTTTAATTTATTAATG	129	3	4	1169
chrM	+	2778	2810	G9833.7	TCCTAAACTACCAAACCTGCATTAAAAATTTCG	154	4	4	776
chrM	+	2850	2932	G9834.1	TACATGCTAAGACTTCACCAGTCAAAGCGAACTACTATACTCAATTGATCCAATAACTTGACCAACGGAACAAGTTACCCTAG	57	4	8	337
chrM	+	3020	3068	G9836.1	CCGCTATTAAAGGTTCGTTTGTTCAACGATTAAAGTCCTACGTGATCTG	96	3	6	1172
chrM	+	3128	3172	G9837.1	AAAGGACAAGAGAAATAAGGCCTACTTCACAAAGCGCCTTCCCCC	144	3	3	728
chrM	+	3180	3219	G9838.1	ATATCATCTCAACTTAGTATTATACCCACACCCACCCAAG	379	4	11	1678
chrM	+	3245	3277	G9839.1	CCCGGTAATCGCATAAAACTTAAAACTTTACAG	60	2	3	459
chrM	+	3305	3352	G9840.1	ACATACCCATGGCCAACCTCCTACTCCTCATTGTACCCATTCTAATCG	12	2	2	98
chrM	+	3458	3481	G9841.1	ACGCCATAAAACTCTTCACCAAAG	49	2	2	194
chrM	+	3671	3688	G9842.1	CATCAAACTCAAACTACG	74	2	2	220
chrM	+	3815	3842	G9843.1	AACACCTCTGATTACTCCTGCCATCATG	29	2	2	212
chrM	+	4143	4175	G9846.1	ATTCCGCTACGACCAACTCATACACCTCCTATG	69	2	2	523
chrM	+	4416	4434	G9848.1	AATAAGCTATCGGGCCCAT	22	2	5	63
chrM	+	4483	4537	G9849.1	CCCAACCCGTCATCTACTCTACCATCTTTGCAGGCACACTCATCACAGCGCTAAG	40	3	7	309
chrM	+	4538	4560	G9849.2	CTCGCACTGATTTTTTACCTGAG	32	3	3	281
chrM	+	4666	4713	G9851.1	CATCCATAATCCTTCTAATAGCTATCCTCTTCAACAATATACTCTCCG	186	7	8	1757
chrM	+	4822	4867	G9852.1	TTACCCAAGGCACCCCTCTGACATCCGGCCTGCTTCTTCTCACATG	161	7	17	1377
chrM	+	4921	4959	G9854.1	TAAGCCTTCTCCTCACTCTCTCAATCTTATCCATCATAG	63	5	11	828
chrM	+	5317	5352	G9857.1	CCACCATCACCCTCCTTAACCTCTACTTCTACCTAC	18	3	7	165
chrM	+	5354	5400	G9858.1	CCTAATCTACTCCACCTCAATCACACTACTCCCCATATCTAACAACG	50	3	11	473
chrM	+	5901	5949	G9861.1	CTGATGTTCGCCGACCGTTGACTATTCTCTACAAACCACAAAGACATTG	154	4	5	1284
chrM	+	6112	6138	G9863.1	TAATACCCATCATAATCGGAGGCTTTG	135	4	12	1053
chrM	+	6191	6300	G9864.1	CATAAACAACATAAGCTTCTGACTCTTACCTCCCTCTCTCCTACTCCTGCTCGCATCTGCTATAGTGGAGGCCGGAGCAGGAACAGGTTGAACAGTCTACCCTCCCTTAG	668	8	14	2673
chrM	+	6447	6504	G9865.1	CCCCTCTTCGTCTGATCCGTCCTAATCACAGCAGTCCTACTTCTCCTATCTCTCCCAG	139	3	3	1206
chrM	+	6571	6651	G9865.2	CCGGAGGAGGAGACCCCATTCTATACCAACACCTATTCTGATTTTTCGGTCACCCTGAAGTTTATATTCTTATCCTACCAG	33	3	6	397
chrM	+	6676	6708	G9865.3	TAACTTACTACTCCGGAAAAAAAGAACCATTTG	141	2	2	830
chrM	+	6862	6951	G9866.1	TATTTAGCTGACTCGCCACACTCCACGGAAGCAATATGAAATGATCTGCTGCAGTGCTCTGAGCCCTAGGATTCATCTTTCTTTTCACCG	139	5	8	1175
chrM	+	7253	7293	G9868.1	AAACATCCTATCATCTGTAGGCTCATTCATTTCTCTAACAG	205	9	18	2551
chrM	+	7665	7689	G9869.1	CCCTCATAATCATTTTCCTTATCTG	12	2	2	130
chrM	+	7770	7814	G9870.1	AAACCGTCTGAACTATCCTGCCCGCCATCATCCTAGTCCTCATCG	42	3	6	293
chrM	+	7929	7959	G9871.1	GACTAATCTTCAACTCCTACATACTTCCCCC	8	2	3	60
chrM	+	8149	8189	G9872.1	ACCGGGGGTATACTACGGTCAATGCTCTGAAATCTGTGGAG	97	2	2	872
chrM	+	9288	9329	G9881.1	ACCTCCGGCCTAGCCATGTGATTTCACTTCCACTCCATAACG	213	5	18	1814
chrM	+	9756	9859	G9886.1	TCTCCCTTCACCATTTCCGACGGCATCTACGGCTCAACATTTTTTGTAGCCACAGGCTTCCACGGACTTCACGTCATTATTGGCTCAACTTTCCTCACTATCTG	389	17	33	4628
chrM	+	9860	9906	G9886.2	CTTCATCCGCCAACTAATATTTCACTTTACATCCAAACATCACTTTG	82	4	5	1177
chrM	+	9919	9962	G9886.3	CCGCCTGATACTGGCATTTTGTAGATGTGGTTTGACTATTTCTG	78	6	6	733
chrM	+	10538	10564	G9890.1	CTCACACCTCATATCCTCCCTACTATG	133	3	3	1059
chrM	+	10590	10635	G9890.2	TTCATTATAGCTACTCTCATAACCCTCAACACCCACTCCCTCTTAG	238	6	15	2415
chrM	+	10647	10675	G9891.1	CCTATTGCCATACTAGTCTTTGCCGCCTG	24	2	6	182
chrM	+	10732	10762	G9892.1	ACTACGTACATAACCTAAACCTACTCCAATG	94	4	7	595
chrM	+	10763	10806	G9892.2	CTAAAACTAATCGTCCCAACAATTATATTACTACCACTGACATG	300	8	19	3258
chrM	+	11197	11246	G9898.1	CACATACTTCCTATTCTACACCCTAGTAGGCTCCCTTCCCCTACTCATCG	52	3	3	483
chrM	+	11275	11306	G9898.2	CTCACTAAACATTCTACTACTCACTCTCACTG	26	2	7	252
chrM	+	11307	11346	G9898.3	CCCAAGAACTATCAAACTCCTGAGCCAACAACTTAATATG	163	3	5	1236
chrM	+	11373	11403	G9899.1	TAAAGATACCTCTTTACGGACTCCACTTATG	342	7	12	2818
chrM	+	11619	11679	G9901.1	CATACTCTTCAATCAGCCACATAGCCCTCGTAGTAACAGCCATTCTCATCCAAACCCCCTG	167	4	4	932
chrM	+	11697	11743	G9902.1	TCATTCTCATAATCGCCCACGGGCTTACATCCTCATTACTATTCTGC	474	14	45	6624
chrM	+	11776	11823	G9902.2	TCGCATCATAATCCTCTCTCAAGGACTTCAAACTCTACTCCCACTAAT	585	10	25	5812
chrM	+	11853	11906	G9903.1	CTAACCTCGCCTTACCCCCCACTATTAACCTACTGGGAGAACTCTCTGTGCTAG	546	11	19	5624
chrM	+	11907	11948	G9903.2	TAACCACGTTCTCCTGATCAAATATCACTCTCCTACTTACAG	102	3	3	1078
chrM	+	12071	12113	G9904.1	TTCATACACCTATCCCCCATTCTCCTCCTATCCCTCAACCCCG	26	3	8	302
chrM	+	12284	12315	G9907.1	CTATCCATTGGTCTTAGGCCCCAAAAATTTTG	58	2	2	596
chrM	+	12900	12923	G9913.1	ATTTATCCTACACTCCAACTCATG	98	3	4	780
chrM	+	13146	13172	G9915.1	CCCACTAATCCAAACTCTAACACTATG	124	3	3	731
chrM	+	13241	13279	G9916.1	TAGCCTTCTCCACTTCAAGTCAACTAGGACTCATAATAG	26	3	4	224
chrM	+	14260	14305	G9922.1	ATCCTCCCGAATCAACCCTGACCCCTCTCCTTCATAAATTATTCAG	22	3	7	144
chrM	+	14832	14888	G9926.1	CATGATGAAACTTCGGCTCACTCCTTGGCGCCTGCCTGATCCTCCAAATCACCACAG	172	7	12	1546
chrM	+	14919	14958	G9926.2	ACGCCTCAACCGCCTTTTCATCAATCGCCCACATCACTCG	109	2	2	785
chrM	+	15429	15466	G9929.1	ACGCCCTCGGCTTACTTCTCTTCCTTCTCTCCTTAATG	194	9	22	2855
chrM	+	15522	15553	G9930.1	CCAACCCCTTAAACACCCCTCCCCACATCAAG	45	2	2	178
chrM	-	231	289	G9937.1	TTTTGTTATGATGTCTGTGTGGAAAGTGGCTGTGCAGACATTCAATTGTTATTATTATG	96	4	86	665
chrM	-	4365	4386	G9938.1	ATAGGTGGCACGGAGAATTTTG	50	2	2	295
chrM	-	5758	5786	G9941.1	AAGCAGCTTCAAACCTGCCGGGGCTTCTC	50	2	34	242
chrM	-	6379	6413	G9942.1	ATTGATAATTGTTGTGATGAAATTGATGGCCCCTA	14	2	3	173
chrM	-	12882	12928	G9955.1	GGTCTCATGAGTTGGAGTGTAGGATAAATCATGCTAAGGCGAGGATG	48	2	4	423
chrM	-	14674	14715	G9961.1	TTTTTCATATCATTGGTCGTGGTTGTAGTCCGTGCGAGAATA	211	4	8	2547	KIAA0825
chrM	-	15282	15326	G9962.1	TTGCTAGGGCTGCAATAATGAAGGGCAAGATGAAGTGAAAGGTAA	15	2	7	63
chrUn_GL000195v1	+	141314	141335	G9966.1	TATTTACTGTATAATTTTTCTG	12	2	13	143
chrUn_GL000218v1	+	17331	17365	G9967.1	ACGTTAGGTCAAGGTGTAGCCCATGAGGTGGCAAG	64	2	5	434	AC097374.1
chrUn_GL000220v1	+	95755	95800	G9968.1	CCAATGGGGTGAAGCTACCATCTGTGGGATTATGACTGAACGCCTC	549	8	13	5157
chrUn_GL000220v1	+	105848	105894	G9969.1	CTTCGTGATCGATGTGGTGACGTCGTGCTCTCCCGGGCCGGGTCCGA	49	4	9	493
chrUn_GL000220v1	+	106072	106114	G9971.1	CGGGCCGGCGGGGTCCTCTGACGCGGCAGACAGCCCTCGCTGT	21	2	2	101	FP671120.1
chrUn_GL000220v1	+	108817	108854	G9975.1	TCGCGGGTCTGTGGCGCGGGGCCCCGGTGGTCGTGTCG	12	2	4	86
chrUn_GL000220v1	+	109045	109133	G9976.1	CCGCGTCGGGGCCTCGCCGCGCTCTACCTTACCTACCTGGTTGATCCTGCCAGTAGCATATGCTTGTCTCAAAGATTAAGCCATGCATG	332	13	20	3292
chrUn_GL000220v1	+	109140	109277	G9976.2	TACGCACGGCCGGTACAGTGAAACTGCGAATGGCTCATTAAATCAGTTATGGTTCCTTTGGTCGCTCGCTCCTCTCCTACTTGGATAACTGTGGTAATTCTAGAGCTAATACATGCCGACGGGCGCTGACCCCCTTCG	39804	38	2068	504538
chrUn_GL000220v1	+	109278	109302	G9976.3	CGGGGGGGATGCGTGCATTTATCAG	202	2	5	1135	FP671120.1
chrUn_GL000220v1	+	109360	109791	G9976.4	GCTTTGGTGACTCTAGATAACCTCGGGCCGATCGCACGCCCCCCGTGGCGGCGACGACCCATTCGAACGTCTGCCCTATCAACTTTCGATGGTAGTCGCCGTGCCTACCATGGTGACCACGGGTGACGGGGAATCAGGGTTCGATTCCGGAGAGGGAGCCTGAGAAACGGCTACCACATCCAAGGAAGGCAGCAGGCGCGCAAATTACCCACTCCCGACCCGGGGAGGTAGTGACGAAAAATAACAATACAGGACTCTTTCGAGGCCCTGTAATTGGAATGAGTCCACTTTAAATCCTTTAACGAGGATCCATTGGAGGGCAAGTCTGGTGCCAGCAGCCGCGGTAATTCCAGCTCCAATAGCGTATATTAAAGTTGCTGCAGTTAAAAAGCTCGTAGT…	67942	69	1679	405887
chrUn_GL000220v1	+	109792	109849	G9976.5	AGGCGAGCCACCGCCCGTCCCCGCCCCTTGCCTCTCGGCGCCCCCTCGATGCTCTTAG	817	9	52	5602
chrUn_GL000220v1	+	109850	109894	G9976.6	CTGAGTGTCCCGCGGGGCCCGAAGCGTTTACTTTGAAAAAATTAG	1492	10	75	13018	FP671120.1
chrUn_GL000220v1	+	109895	110228	G9976.7	AGTGTTCAAAGCAGGCCCGAGCCGCCTGGATACCGCAGCTAGGAATAATGGAATAGGACCGCGGTTCTATTTTGTTGGTTTTCGGAACTGAGGCCATGATTAAGAGGGACGGCCGGGGGCATTCGTATTGCGCCGCTAGAGGTGAAATTCTTGGACCGGCGCAAGACGGACCAGAGCGAAAGCATTTGCCAAGAATGTTTTCATTAATCAAGAACGAAAGTCGGAGGTTCGAAGACGATCAGATACCGTCGTAGTTCCGACCATAAACGATGCCGACCGGCGATGCGGCGGCGTTATTCCCATGACCCGCCGGGCAGCTTCCGGGAAACCAAAG	24386	65	690	156682
chrUn_GL000220v1	+	110229	110644	G9976.8	TCTTTGGGTTCCGGGGGGAGTATGGTTGCAAAGCTGAAACTTAAAGGAATTGACGGAAGGGCACCACCAGGAGTGGAGCCTGCGGCTTAATTTGACTCAACACGGGAAACCTCACCCGGCCCGGACACGGACAGGATTGACAGATTGATAGCTCTTTCTCGATTCCGTGGGTGGTGGTGCATGGCCGTTCTTAGTTGGTGGAGCGATTTGTCTGGTTAATTCCGATAACGAACGAGACTCTGGCATGCTAACTAGTTACGCGACCCCCGAGCGGTCGGCGTCCCCCAACTTCTTAGAGGGACAAGTGGCGTTCAGCCACCCGAGATTGAGCAATAACAGGTCTGTGATGCCCTTAGATGTCCGGGGCTGCACGCGCGCTACACTGACTGGCTCAGCGTG…	48821	94	1653	353138
chrUn_GL000220v1	+	110645	110926	G9976.9	CAGGCGCGGGTAACCCGTTGAACCCCATTCGTGATGGGGATCGGGGATTGCAATTATTCCCCATGAACGAGGAATTCCCAGTAAGTGCGGGTCATAAGCTTGCGTTGATTAAGTCCCTGCCCTTTGTACACACCGCCCGTCGCTACTACCGATTGGATGGTTTAGTGAGGCCCTCGGATCGGCCCCGCCGGGGTCGGCCCACGGCCCTGGCGGAGCGCTGAGAAGACGGTCGAACTTGACTATCTAGAGGAAGTAAAAGTCGTAACAAGGTTTCCGTAGGTG	49521	56	1678	342526
chrUn_GL000220v1	+	112016	112181	G9979.1	ACCTCGTACGACTCTTAGCGGTGGATCACTCGGCTCGTGCGTCGATGAAGAACGCAGCTAGCTGCGAGAATTAATGTGAATTGCAGGACACATTGATCATCGACACTTCGAACGCACTTGCGGCCCCGGGTTCCTCCCGGGGCTACGCCTGTCTGAGCGTCGCTTG	188739	36	6826	1736162	FP236383.1
chrUn_GL000220v1	+	113265	113299	G9983.1	TCTCCCGACGGAGCGTCGGGCGGGCGGTCGGGCCG	116	2	3	379
chrUn_GL000220v1	+	113345	113440	G9984.1	AGACGCGACCTCAGATCAGACGTGGCGACCCGCTGAATTTAAGCATATTAGTCAGCGGAGGAGAAGAAACTAACCAGGATTCCCTCAGTAACGGCG	140789	16	4216	920514
chrUn_GL000220v1	+	113441	113583	G9984.2	AGTGAACAGGGAAGAGCCCAGCGCCGAATCCCCGCCCCGCGGCGGGGCGCGGGACATGTGGCGTACGGAAGACCCGCTCCCCGGCGCCGCTCGTGGGGGGCCCAAGTCCTTCTGATCGAGGCCCAGCCCGTGGACGGTGTGAG	20334	15	555	97513
chrUn_GL000220v1	+	113592	113641	G9984.3	CGGCCCCCGGCGCGCCGGGCCCGGGTCTTCCCGGAGTCGGGTTGCTTGGG	775	8	29	5934	FP671120.1
chrUn_GL000220v1	+	113642	113688	G9984.4	AATGCAGCCCAAAGCGGGTGGTAAACTCCATCTAAGGCTAAATACCG	129	3	4	723
chrUn_GL000220v1	+	113689	113800	G9984.5	GCACGAGACCGATAGTCAACAAGTACCGTAAGGGAAAGTTGAAAAGAACTTTGAAGAGAGAGTTCAAGAGGGCGTGAAACCGTTAAGAGGTAAACGGGTGGGGTCCGCGCAG	23675	16	428	118652
chrUn_GL000220v1	+	113801	113872	G9984.6	TCCGCCCGGAGGATTCAACCCGGCGGCGGGTCCGGCCGTGTCGGCGGCCCGGCGGATCTTTCCCGCCCCCCG	796	7	20	4574
chrUn_GL000220v1	+	114032	114095	G9985.1	CATTTCCACCGCGGCGGTGCGCCGCGACCGGCTCCGGGACGGCTGGGAAGGCCCGGCGGGGAAG	7350	6	200	40764
chrUn_GL000220v1	+	114260	114367	G9985.2	TTACAGCCCCCCCGGCAGCAGCACTCGCCGAATCCCGGGGCCGAGGGAGCGAGACCCGTCGCCGCGCTCTCCCCCCTCCCGGCGCCCACCCCCGCGGGGAATCCCCCG	1868	7	19	5147
chrUn_GL000220v1	+	114370	114401	G9985.3	AGGGGGGTCTCCCCCGCGGGGGCGCGCCGGCG	495	2	6	952	FP236383.1
chrUn_GL000220v1	+	114434	114474	G9985.4	ACGGCGCGACCGCTCTCCCACCCCTCCTCCCCGCGCCCCCG	297	3	9	801
chrUn_GL000220v1	+	114495	114601	G9985.5	CCGCGCGCGGGTCGGGGGGCGGGGCGGACTGTCCCCAGTGCGCCCCGGGCGGGTCGCGCCGTCGGGCCCGGGGGAGGTTCTCTCGGGGCCACGCGCGCGTCCCCCGA	13592	10	123	30256
chrUn_GL000220v1	+	114617	114755	G9985.6	AGCGAGCGCACGGGGTCGGCGGCGACGTCGGCTACCCACCCGACCCGTCTTGAAACACGGACCAAGGAGTCTAACACGTGCGCGAGTCGGGGGCTCGCACGAAAGCCGCCGTGGCGCAATGAAGGTGAAGGCCGGCGCG	23693	14	307	88839	FP671120.1
chrUn_GL000220v1	+	114756	114791	G9985.7	CTCGCCGGCCGAGGTGGGATCCCGAGGCCTCTCCAG	1180	5	24	5009	FP236383.1
chrUn_GL000220v1	+	114792	115166	G9985.8	TCCGCCGAGGGCGCACCACCGGCCCGTCTCGCCCGCCGCGCCGGGGAGGTGGAGCACGAGCGCACGTGTTAGGACCCGAAAGATGGTGAACTATGCCTGGGCAGGGCGAAGCCAGAGGAAACTCTGGTGGAGGTCCGTAGCGGTCCTGACGTGCAAATCGGTCGTCCGACCTGGGTATAGGGGCGAAAGACTAATCGAACCATCTAGTAGCTGGTTCCCTCCGAAGTTTCCCTCAGGATAGCTGGCGCTCTCGCAGACCCGACGCACCCCCGCCACGCAGTTTTATCCGGTAAAGCGAATGATTAGAGGTCTTGGGGCCGAAACGATCTCAACCTATTCTCAAACTTTAAATGGGTAAGAAGCCCGGCTCGCTGG	157387	67	4138	1133421
chrUn_GL000220v1	+	115212	115515	G9985.9	GTAAGCAGAACTGGCGCTGCGGGATGAACCGAACGCCGGGTTAAGGCGCCCGATGCCGACGCTCATCAGACCCCAGAAAAGGTGTTGGTTGATATAGACAGCAGGACGGTGGCCATGGAAGTCGGAATCCGCTAAGGAGTGTGTAACAACTCACCTGCCGAATCAACTAGCCCTGAAAATGGATGGCGCTGGAGCGTCGGGCCCATACCCGGCCGTCGCCGGCAGTCGAGAGTGGACGGGAGCGGCGGGGGCGGCGCGCGCGCGCGCGCGTGTGGTGTGCGTCGGAGGGCGGCGGCGGCGGCGG	139368	42	2945	760939
chrUn_GL000220v1	+	115557	115875	G9986.1	CCTCCTCCCCTCCTCCCGCCCACGCCCCGCTCCCCGCCCCCGGAGCCCCGCGGACGCTACGCCGCGACGAGTAGGAGGGCCGCTGCGGTGAGCCTTGAAGCCTAGGGCGCGGGCCCGGGTGGAGCCGCCGCAGGTGCAGATCTTGGTGGTAGTAGCAAATATTCAAACGAGAACTTTGAAGGCCGAAGTGGAGAAGGGTTCCATGTGAACAGCAGTTGAACATGGGTCAGTCGGTCCTGAGAGATGGGCGAGCGCCGTTCCGAAGGGACGGGCGATGGCCTCCGTTGCCCTCGGCCGATCGAAAGGGAGTCGGGTTCAG	211881	46	4820	1350567
chrUn_GL000220v1	+	115876	115911	G9986.2	ATCCCCGAATCCGGAGTGGCGGAGATGGGCGCCGCG	14192	4	105	43183	FP671120.1
chrUn_GL000220v1	+	115912	116015	G9986.3	AGGCGTCCAGTGCGGTAACGCGACCGATCCCGGAGAAGCCGGCGGGAGCCCCGGGGAGAGTTCTCTTTTCTTTGTGAAGGGCAGGGCGCCCTGGAATGGGTTCG	7083	15	103	30208
chrUn_GL000220v1	+	116016	116278	G9986.4	CCCCGAGAGAGGGGCCCGTGCCTTGGAAAGCGTCGCGGTTCCGGCGGCGTCCGGTGAGCTCTCGCTGGCCCTTGAAAATCCGGGGGAGAGGGTGTAAATCTCGCGCCGGGCCGTACCCATATCCGCAGCAGGTCTCCAAGGTGAACAGCCTCTGGCATGTTGGAACAATGTAGGTAAGGGAAGTCGGCAAGCCGGATCCGTAACTTCGGGATAAGGATTGGCTCTAAGGGCTGGGTCGGTCGGGCTGGGGCGCGAAGCGGGGC	94391	46	2673	717010
[truncated: 116 more rows]

## Sheet: Pum1KO-1_PAR-CLIP
Chromosome	Strand	ClusterStart	ClusterEnd	ClusterID	ClusterSequence	ReadCount	ConversionLocationCount	ConversionEventCount	NonConversionEventCount
[truncated: 2,292 more rows]

[truncated: 1 more sheets: Pum1KO-2_PAR-CLIP]
