# Supplementary material for: PUMILIO Proteins in Colorectal Cancer: Tumor Growth Promoting Function and Potential as Therapeutic Targets
Source: Research Square preprint supplement (doi:10.21203/rs.3.rs-199046/v1), 2021-02-11
Supplement: Supplementary file 9 [file be0f4d055f69f9f925c2c8f2.xlsx]

## Sheet: Sheet1
Table S3. Changed mRNAs in Pum2-/- HCT116 cells
AccID	type_of_gene	Location	Strand	KeggID	Description	log2FC	Pvalue	WT-1	WT-2	Pum2-/--1	Pum2-/--2
RAB7B	protein-coding	chr1:205976740-206003466	-	hsa:338382	RAB7B, member RAS oncogene family	4.72377	0.00950329	1	0	11	17
TSC22D1	protein-coding	chr13:44432143-44576565	-	hsa:8848	TSC22 domain family, member 1	-1.06977	1.07659e-39	7334	9766	4045	4326
RAB4B	protein-coding	chr19:40778219-40796944	+	hsa:53916	RAB4B, member RAS oncogene family	0.660229	0.00702598	144	193	231	318
FLNA	protein-coding	chrx:154348529-154374633	-	hsa:2316	filamin A, alpha	0.70852	8.72714e-17	18796	21365	32759	35388
FLNC	protein-coding	chr7:128830429-128859274	+	hsa:2318	filamin C, gamma	1.07465	2.17372e-34	3462	4079	7965	8479
C20orf195	protein-coding	chr20:63555349-63556712	+	hsa:79025	chromosome 20 open reading frame 195	1.56631	0.00078689	29	32	115	71
FAM131B	protein-coding	chr7:143353400-143382304	-	hsa:9715	family with sequence similarity 131, member B	1.39474	0.0135422	20	20	45	65
VIM-AS1	ncRNA	chr10:17214239-17229985	-	hsa:100507347	VIM antisense RNA 1	4.02872	1.27232e-05	3	2	45	40
FAM132B	protein-coding	chr2:238159008-238168890	+	hsa:151176	family with sequence similarity 132, member B	1.04011	2.45515e-05	107	154	276	273
GOLGA2P7	pseudo	chr15:84198848-84230168	-	hsa:388152	golgin A2 pseudogene 7	-0.822911	0.0440725	123	89	73	54
LOC105378687	lncRNA	chr1:43354684-43358615	-		uncharacterized LOC105378687	0.867546	0.0410416	63	41	105	97
RAB15	protein-coding	chr14:64945814-64972157	-	hsa:376267	RAB15, member RAS oncogene family	0.794522	9.26983e-05	222	244	427	411
RAB19	protein-coding	chr7:140403740-140426881	+	hsa:401409	RAB19, member RAS oncogene family	-1.00712	0.0135613	76	106	41	52
RNFT2	protein-coding	chr12:116738291-116853631	+	hsa:84900	ring finger protein, transmembrane 2	0.754817	0.0260038	88	74	135	153
SSH3	protein-coding	chr11:67303478-67312607	+	hsa:54961	slingshot protein phosphatase 3	0.631135	2.02319e-06	632	755	1056	1166
SSH1	protein-coding	chr12:108782694-108857606	-	hsa:54434	slingshot protein phosphatase 1	-0.628073	6.02225e-12	4998	7218	4022	4052
ARHGEF9	protein-coding	chrx:63634967-63755143	-	hsa:23229	Cdc42 guanine nucleotide exchange factor (GEF) 9	-0.71702	0.00933009	165	236	135	114
ARHGEF2	protein-coding	chr1:155946853-155971063	-	hsa:9181	Rho/Rac guanine nucleotide exchange factor (GEF) 2	0.717938	9.87273e-08	727	792	1274	1322
RAB3B	protein-coding	chr1:51907956-51990764	-	hsa:5865	RAB3B, member RAS oncogene family	0.97771	1.51084e-21	1283	1847	3106	3197
RAB38	protein-coding	chr11:88113247-88175467	-	hsa:23682	RAB38, member RAS oncogene family	-0.666613	0.000687741	333	474	262	258
CDC73	protein-coding	chr1:193121958-193254815	+	hsa:79577	cell division cycle 73	-0.788718	0.0368345	90	125	74	53
RAB25	protein-coding	chr1:156061149-156070514	+	hsa:57111	RAB25, member RAS oncogene family	-0.884852	1.24201e-17	2082	2768	1329	1369
SETD1A	protein-coding	chr16:30957294-30984664	+	hsa:9739	SET domain containing 1A	0.593134	1.2083e-06	1103	1221	1829	1809
TBC1D26	protein-coding	chr17:15732277-15744784	+	hsa:353149	TBC1 domain family, member 26	-4.97067	0.0417208	2	10	0	0
SSPO	protein-coding	chr7:149776042-149833965	+	hsa:23145	SCO-spondin	3.0906	0.0142306	4	0	15	23
NOP14-AS1	ncRNA	chr4:2935546-2951078	+	hsa:317648	NOP14 antisense RNA 1	0.669262	3.53464e-05	350	436	609	681
LINC00896	ncRNA	chr22:20206332-20208537	+	hsa:150197	long intergenic non-protein coding RNA 896	1.45066	0.0050413	30	21	85	62
TBC1D8B	protein-coding	chrx:106802689-106876150	+	hsa:54885	TBC1 domain family, member 8B (with GRAM domain)	-0.746328	0.0239606	172	137	94	101
NUDCD2	protein-coding	chr5:163453580-163460137	-	hsa:134492	NudC domain containing 2	-0.598128	0.00151662	411	625	375	321
PALM3	protein-coding	chr19:14053367-14062136	-	hsa:342979	paralemmin 3	1.3265	0.000131313	50	62	153	136
RAB3IL1	protein-coding	chr11:61898382-61920266	-	hsa:5866	RAB3A interacting protein (rabin3)-like 1	0.642458	0.000137684	318	434	617	586
TBC1D19	protein-coding	chr4:26584084-26813878	+	hsa:55296	TBC1 domain family, member 19	-0.856211	8.89772e-05	291	363	173	200
RELL2	protein-coding	chr5:141636946-141641077	+	hsa:285613	RELT-like 2	0.74093	0.00149163	155	176	282	291
TBC1D17	protein-coding	chr19:49877425-49888750	+	hsa:79735	TBC1 domain family, member 17	0.58742	0.000228783	502	617	942	788
STOM	protein-coding	chr9:121338988-121370304	-	hsa:2040	stomatin	-0.672692	3.55299e-06	732	994	566	544
LOC105378512	lncRNA	chr10:119595564-119599806	+		uncharacterized LOC105378512	1.55305	0.0158631	10	19	44	42
TRIB1	protein-coding	chr8:125430100-125438404	+	hsa:10221	tribbles pseudokinase 1	-0.641259	5.06762e-16	10006	13372	7283	8125
FAM117B	protein-coding	chr2:202635178-202769757	+	hsa:150864	family with sequence similarity 117, member B	-0.763864	0.00037955	352	373	227	217
LOC102724895	ncRNA	chr18:70335508-70338180	-	hsa:102724895	uncharacterized LOC102724895	-2.15442	0.033748	14	26	6	3
FAM110C	protein-coding	chr2:38814-46588	-	hsa:642273	family with sequence similarity 110, member C	-1.10446	1.05277e-05	222	290	118	127
LOC100288069	ncRNA	chr1:764865-778688	-	hsa:100288069	uncharacterized LOC100288069	0.816838	0.00278246	96	131	189	222
LOC102724800	ncRNA	chr21:41768058-41776078	+	hsa:102724800	uncharacterized LOC102724800	5.18611	0.0220938	0	0	5	9
GPRC5C	protein-coding	chr17:74432116-74451658	+	hsa:55890	G protein-coupled receptor, class C, group 5, member C	0.636537	1.49232e-06	654	788	1079	1240
LINC00704	ncRNA	chr10:4656156-4662419	+	hsa:100216001	long intergenic non-protein coding RNA 704	4.78821	1.29184e-05	0	3	38	45
CHPF2	protein-coding	chr7:151232489-151238827	+	hsa:54480	chondroitin polymerizing factor 2	0.647913	1.97391e-05	423	514	722	795
BCAM	protein-coding	chr19:44809059-44821421	+	hsa:4059	basal cell adhesion molecule (Lutheran blood group)	1.20488	4.84394e-12	231	296	624	626
FAM107B	protein-coding	chr10:14518557-14572373	-	hsa:83641	family with sequence similarity 107, member B	-1.10606	8.07431e-10	520	656	297	265
FAM104B	protein-coding	chrx:55143102-55161195	-	hsa:90736	family with sequence similarity 104, member B	-0.657085	0.0477842	111	181	74	115
TINCR	ncRNA	chr19:5558167-5568034	-	hsa:257000	tissue differentiation-inducing non-protein coding RNA	1.38412	1.21993e-07	109	107	307	280
F2	protein-coding	chr11:46719166-46739508	+	hsa:2147	coagulation factor II (thrombin)	4.96849	0.0358153	0	0	5	7
F3	protein-coding	chr1:94529176-94541857	-	hsa:2152	coagulation factor III (thromboplastin, tissue factor)	1.20153	6.68582e-19	436	567	1126	1249
FH	protein-coding	chr1:241497557-241519785	-	hsa:2271	fumarate hydratase	-0.636121	2.9831e-06	823	1141	639	656
GCHFR	protein-coding	chr15:40764087-40767713	+	hsa:2644	GTP cyclohydrolase I feedback regulator	2.03353	1.63999e-07	34	33	153	132
HR	protein-coding	chr8:22114419-22131053	-	hsa:55806	hair growth associated	1.70201	9.24171e-36	412	575	1722	1563
GPNMB	protein-coding	chr7:23246697-23275110	+	hsa:10457	glycoprotein (transmembrane) nmb	-1.23739	0.0407915	36	49	18	19
TRHDE	protein-coding	chr12:72272749-72665642	+	hsa:29953	thyrotropin-releasing hormone degrading enzyme	1.64859	0.0474286	9	7	22	31
BCL3	protein-coding	chr19:44746363-44758841	+	hsa:602	B-cell CLL/lymphoma 3	0.850314	3.16189e-05	201	233	410	399
FAM102A	protein-coding	chr9:127940582-127950714	-	hsa:399665	family with sequence similarity 102, member A	0.616989	1.07158e-05	545	830	1079	1070
TMEM59L	protein-coding	chr19:18612872-18621039	+	hsa:25789	transmembrane protein 59-like	1.31605	1.67874e-08	121	142	313	365
PC	protein-coding	chr11:66848522-66878332	-	hsa:5091	pyruvate carboxylase	0.767364	0.00700537	202	136	284	331
CDCA3	protein-coding	chr12:6844798-6852066	-	hsa:83461	cell division cycle associated 3	0.669862	2.40212e-07	972	1045	1547	1796
TIMP2	protein-coding	chr17:78852977-78925390	-	hsa:7077	TIMP metallopeptidase inhibitor 2	1.00369	1.94703e-33	4265	5533	10173	10024
TIMP3	protein-coding	chr22:32800816-32863041	+	hsa:7078	TIMP metallopeptidase inhibitor 3	1.42273	1.96408e-06	58	93	191	222
LOC105378347	lncRNA	chr10:69806962-69822323	-		uncharacterized LOC105378347	5.94812	0.00327187	0	0	4	20
RAP1GAP2	protein-coding	chr17:2853541-3037741	+	hsa:23108	RAP1 GTPase activating protein 2	1.2031	0.00279252	49	41	103	115
LOC102724279	ncRNA	chr19:15851993-15864904	-	hsa:102724279	uncharacterized LOC102724279	-0.797728	0.0214212	124	191	63	123
TMEM205	protein-coding	chr19:11342776-11346305	-	hsa:374882	transmembrane protein 205	-0.703655	9.5429e-05	426	603	294	354
BDNF	protein-coding	chr11:27654893-27722058	-	hsa:627	brain-derived neurotrophic factor	0.601583	0.0270554	117	140	177	227
ADRB2	protein-coding	chr5:148826593-148828634	+	hsa:154	adrenoceptor beta 2, surface	1.71589	0.0432549	9	6	29	23
C2orf47	protein-coding	chr2:199955566-199963820	+	hsa:79568	chromosome 2 open reading frame 47	-0.874349	0.00155664	246	231	150	122
SNED1	protein-coding	chr2:240997412-241095568	+	hsa:25992	sushi, nidogen and EGF-like domains 1	1.97251	0.0435059	5	6	32	12
TRAPPC2	protein-coding	chrx:13712243-13734631	-	hsa:6399	trafficking protein particle complex 2	-0.720417	0.000798148	278	440	224	219
WDR81	protein-coding	chr17:1724808-1738585	+	hsa:124997	WD repeat domain 81	0.609999	0.0212581	108	161	213	206
WDR66	protein-coding	chr12:121918557-121972069	+	hsa:144406	WD repeat domain 66	1.17911	0.00747859	34	37	78	89
WDR62	protein-coding	chr19:36054881-36105111	+	hsa:284403	WD repeat domain 62	0.735281	2.70478e-10	811	1041	1553	1621
C2orf78	protein-coding	chr2:73784189-73817147	+	hsa:388960	chromosome 2 open reading frame 78	-2.1666	0.00159602	43	47	6	15
WDR35	protein-coding	chr2:19910260-19966811	-	hsa:57539	WD repeat domain 35	-0.713774	0.00920748	158	245	129	121
WDR31	protein-coding	chr9:113313222-113340340	-	hsa:114987	WD repeat domain 31	-1.00593	0.00138956	160	173	72	101
WDR25	protein-coding	chr14:100397186-100530301	+	hsa:79446	WD repeat domain 25	0.943254	0.0018286	90	89	176	183
LOC102724191	pseudo	chr15:84476478-84487114	-		chondroitin sulfate proteoglycan 4-like	0.893558	0.0444448	32	49	67	87
CHRM1	protein-coding	chr11:62908679-62921540	-	hsa:1128	cholinergic receptor, muscarinic 1	2.81251	0.0109559	0	7	27	20
SLC20A2	protein-coding	chr8:42416481-42541705	-	hsa:6575	solute carrier family 20 (phosphate transporter), member 2	-0.670724	3.89169e-07	905	1169	654	687
HLA-A	protein-coding	chr6:29942470-29945884	+	hsa:3105	major histocompatibility complex, class I, A	0.931712	0.000255539	202	219	299	542
WDR90	protein-coding	chr16:649363-667833	+	hsa:197335	WD repeat domain 90	0.791193	0.0140275	71	88	134	150
WDR89	protein-coding	chr14:63597039-63641923	-	hsa:112840	WD repeat domain 89	-0.632799	0.0100417	198	298	168	158
HYDIN	protein-coding	chr16:71031411-71230722	-	hsa:54768	HYDIN, axonemal central pair apparatus protein	2.05561	0.0187316	6	6	23	29
GPR87	protein-coding	chr3:151294086-151316848	-	hsa:53836	G protein-coupled receptor 87	-4.41532	0.000139872	34	27	3	0
UNC13D	protein-coding	chr17:75827225-75844717	-	hsa:201294	unc-13 homolog D (C. elegans)	0.707552	0.00184186	235	209	365	397
LOC102724156	ncRNA	chr9:88066435-88077900	-	hsa:102724156	uncharacterized LOC102724156	-4.81294	0.00952586	9	19	0	1
LOC100132570	pseudo	chr17:46266927-46269810	+		chromosome 17 open reading frame 58 pseudogene	3.20344	0.0134082	0	4	13	23
RADIL	protein-coding	chr7:4799109-4883704	-	hsa:55698	Ras association and DIL domains	1.23323	0.00868509	20	54	85	88
TMEM38A	protein-coding	chr19:16661127-16689020	+	hsa:79041	transmembrane protein 38A	0.692225	0.0014106	194	235	383	331
C11orf45	protein-coding	chr11:128899565-128909520	-	hsa:219833	chromosome 11 open reading frame 45	1.23206	0.0266851	16	31	45	67
LOC105378914	lncRNA	chr1:114582307-114586881	+		uncharacterized LOC105378914	1.86397	0.0490705	6	5	20	22
LOC105378913	lncRNA	chr1:114538607-114548193	-		uncharacterized LOC105378913	4.96181	0.0370128	0	0	4	8
PPP1R3G	protein-coding	chr6:5085486-5087221	+	hsa:648791	protein phosphatase 1, regulatory subunit 3G	3.21278	0.0279688	0	3	14	13
NOTCH2NL	protein-coding	chr1:146151908-146229032	-	hsa:388677	notch 2 N-terminal like	1.11332	0.0322853	24	30	48	73
SYNM	protein-coding	chr15:99105069-99136586	+	hsa:23336	synemin, intermediate filament protein	1.36674	0.0120045	28	18	65	61
SYNC	protein-coding	chr1:32679906-32702760	-	hsa:81493	syncoilin, intermediate filament protein	0.999867	0.0272648	26	53	79	80
SYT3	protein-coding	chr19:50621977-50639845	-	hsa:84258	synaptotagmin III	0.741487	0.0152929	84	99	161	155
STAMBPL1	protein-coding	chr10:88882015-88923489	+	hsa:57559	STAM binding protein-like 1	-0.615569	0.0195146	166	243	130	143
ICAM1	protein-coding	chr19:10270841-10286615	+	hsa:3383	intercellular adhesion molecule 1	1.26343	9.07568e-17	332	405	859	969
SRRM3	protein-coding	chr7:76201893-76287292	+	hsa:222183	serine/arginine repetitive matrix 3	0.807597	1.54067e-05	307	310	556	570
CDH15	protein-coding	chr16:89171755-89195492	+	hsa:1013	cadherin 15, type 1, M-cadherin (myotubule)	1.02041	0.00404067	54	65	127	122
TMEM107	protein-coding	chr17:8172978-8176396	-	hsa:84314	transmembrane protein 107	0.5986	3.50345e-05	589	825	958	1242
JMJD1C-AS1	ncRNA	chr10:63465229-63466563	+	hsa:84989	JMJD1C antisense RNA 1	1.51435	0.0100675	23	16	41	78
TMEM125	protein-coding	chr1:43270809-43274002	+	hsa:128218	transmembrane protein 125	-1.05974	0.000379718	164	188	85	90
TMEM121	protein-coding	chr14:105526616-105530202	+	hsa:80757	transmembrane protein 121	0.692386	0.0197354	88	108	156	171
ALG1L10P	ncRNA	chr12:8227734-8231764	+		asparagine-linked glycosylation 1-like 10, pseudogene	1.87449	0.00984047	9	10	38	34
TMEM139	protein-coding	chr7:143284899-143288049	+	hsa:135932	transmembrane protein 139	1.03345	7.0723e-05	96	133	230	251
TMEM133	protein-coding	chr11:100992080-100993935	+	hsa:83935	transmembrane protein 133	1.09935	0.00274606	46	66	133	112
HCFC1	protein-coding	chrx:153947556-153971833	-	hsa:3054	host cell factor C1	0.712383	1.28525e-13	3867	4960	7795	7066
TGFB1I1	protein-coding	chr16:31472208-31477960	+	hsa:7041	transforming growth factor beta 1 induced transcript 1	1.55932	5.83491e-16	163	220	605	552
MFSD6	protein-coding	chr2:190408355-190502314	+	hsa:54842	major facilitator superfamily domain containing 6	0.61527	0.00365224	198	231	331	349
MFSD7	protein-coding	chr4:681824-689441	-	hsa:84179	major facilitator superfamily domain containing 7	1.94293	0.00300233	7	18	51	45
TMEM173	protein-coding	chr5:139475531-139482720	-	hsa:340061	transmembrane protein 173	0.767037	3.78205e-06	307	402	585	657
TMEM175	protein-coding	chr4:932457-958656	+	hsa:84286	transmembrane protein 175	0.673203	0.00858125	117	156	224	223
LTA4H	protein-coding	chr12:96000753-96035661	-	hsa:4048	leukotriene A4 hydrolase	-0.745437	3.17402e-13	2801	4050	2108	2065
GPSM1	protein-coding	chr9:136327476-136341836	+	hsa:26086	G-protein signaling modulator 1	0.868706	1.11963e-07	398	420	763	791
ALG1L15P	pseudo	chr3:156044129-156044950	-		asparagine-linked glycosylation 1-like 15, pseudogene	-5.25308	0.0266331	1	14	0	0
MTSS1L	protein-coding	chr16:70661204-70686207	-	hsa:92154	metastasis suppressor 1-like	0.806412	3.91114e-08	925	1065	2010	1582
CHST2	protein-coding	chr3:143119776-143124014	+	hsa:9435	carbohydrate (N-acetylglucosamine-6-O) sulfotransferase 2	1.51593	0.000426347	29	36	87	105
CHST1	protein-coding	chr11:45648871-45665656	-	hsa:8534	carbohydrate (keratan sulfate Gal-6) sulfotransferase 1	2.40832	3.77872e-05	9	15	61	69
DUSP9	protein-coding	chrx:153643578-153651326	+	hsa:1852	dual specificity phosphatase 9	0.61383	0.000180787	404	557	810	694
PARM1	protein-coding	chr4:74933075-75050115	+	hsa:25849	prostate androgen-regulated mucin-like protein 1	-0.768779	0.0454837	85	103	55	59
LOC105378751	lncRNA	chr1:58761013-58770708	+		uncharacterized LOC105378751	4.95506	0.0388928	0	0	3	9
PLXNA1	protein-coding	chr3:126988594-127037392	+	hsa:5361	plexin A1	0.820308	4.9677e-12	1166	1511	2583	2269
PLXNA3	protein-coding	chrx:154458287-154472602	+	hsa:55558	plexin A3	0.660201	3.65245e-06	575	750	1138	1011
GLIS3	protein-coding	chr9:3824127-4300080	-	hsa:169792	GLIS family zinc finger 3	2.83882	4.58562e-26	56	50	389	402
IRF2BP1	protein-coding	chr19:45883607-45886170	-	hsa:26145	interferon regulatory factor 2 binding protein 1	0.733598	3.43582e-08	626	749	1190	1171
PLXNB1	protein-coding	chr3:48403854-48429944	-	hsa:5364	plexin B1	0.639943	4.53312e-05	389	538	763	716
PLXND1	protein-coding	chr3:129555214-129606654	-	hsa:23129	plexin D1	0.643627	1.37005e-07	820	1047	1535	1465
FUT8	protein-coding	chr14:65646520-65744122	+	hsa:2530	fucosyltransferase 8 (alpha (1,6) fucosyltransferase)	0.850531	0.0181592	48	82	115	123
ENPP7P8	pseudo	chr11:71722143-71780314	+		ectonucleotide pyrophosphatase/phosphodiesterase 7 pseudogene 8	5.84453	0.000287978	1	0	29	31
SNHG6	ncRNA	chr8:66921930-66925542	-	hsa:641638	small nucleolar RNA host gene 6 (non-protein coding)	-0.700102	5.50415e-05	584	1042	506	504
TUBB4A	protein-coding	chr19:6494319-6502584	-	hsa:10382	tubulin, beta 4A class IVa	0.890559	2.13492e-08	533	788	1393	1098
LTBP2	protein-coding	chr14:74498183-74612239	-	hsa:4053	latent transforming growth factor beta binding protein 2	0.784404	0.0367792	55	63	111	99
LTBP3	protein-coding	chr11:65538559-65558382	-	hsa:4054	latent transforming growth factor beta binding protein 3	0.789766	3.70997e-09	1926	2079	3977	3202
LOC101930275	ncRNA	chr8:17801344-17822430	+	hsa:101930275	uncharacterized LOC101930275	-0.945051	0.00882575	135	140	91	57
LOC101929295	ncRNA	chr11:95150539-95159148	+	hsa:101929295	uncharacterized LOC101929295	1.7185	0.000107848	21	37	91	103
ZBED5-AS1	ncRNA	chr11:10858217-10879276	+	hsa:729013	ZBED5 antisense RNA 1	-0.701207	0.0199671	125	201	97	107
OSGIN1	protein-coding	chr16:83953222-83966332	+	hsa:29948	oxidative stress induced growth inhibitor 1	0.771827	2.75029e-06	360	489	652	840
LINGO1	protein-coding	chr15:77613024-77819524	-	hsa:84894	leucine rich repeat and Ig domain containing 1	0.621393	0.000509524	422	467	781	634
OPN3	protein-coding	chr1:241593150-241640399	-	hsa:23596	opsin 3	-0.780195	0.0394891	87	110	62	56
LOC554206	pseudo	chr16:25031741-25032777	+	hsa:554206	leucine carboxyl methyltransferase 1 pseudogene	4.05697	0.046543	0	1	7	10
CHMP4A	protein-coding	chr14:24209581-24213830	-	hsa:29082	charged multivesicular body protein 4A	-0.662171	0.00896146	203	292	176	143
FASTKD2	protein-coding	chr2:206765577-206868284	+	hsa:22868	FAST kinase domains 2	-0.934106	2.0768e-07	447	626	267	309
CHMP2B	protein-coding	chr3:87227263-87255548	+	hsa:25978	charged multivesicular body protein 2B	-0.604935	0.00647161	253	380	222	202
TBC1D2	protein-coding	chr9:98198998-98255721	-	hsa:55357	TBC1 domain family, member 2	0.710388	8.07254e-05	390	385	608	719
TUBA1A	protein-coding	chr12:49184795-49189324	-	hsa:7846	tubulin, alpha 1a	0.796978	3.05216e-14	3624	3949	6267	7447
LOC101929540	ncRNA	chr10:38403166-38427975	+	hsa:101929540	uncharacterized LOC101929540	1.13282	0.0301005	27	25	63	56
PHLDB3	protein-coding	chr19:43474341-43504914	-	hsa:653583	pleckstrin homology-like domain, family B, member 3	0.659948	0.00132063	186	272	361	379
LOC101929575	ncRNA	chr20:20254830-20267834	-	hsa:101929575	uncharacterized LOC101929575	1.92288	0.040443	5	6	22	21
CNTNAP1	protein-coding	chr17:42682614-42699993	+	hsa:8506	contactin associated protein 1	0.703131	0.0153627	94	117	158	197
CNTNAP3	protein-coding	chr9:39072767-39288303	-	hsa:79937	contactin associated protein-like 3	0.992714	0.000605697	138	107	227	290
TEKT2	protein-coding	chr1:36084075-36088275	+	hsa:27285	tektin 2 (testicular)	-5.00194	0.0370134	3	9	0	0
ZNF804A	protein-coding	chr2:184598366-184939487	+	hsa:91752	zinc finger protein 804A	6.18323	0.00118472	0	0	9	19
LOXL4	protein-coding	chr10:98247690-98268221	-	hsa:84171	lysyl oxidase-like 4	1.28987	0.000295265	43	67	122	153
LOXL2	protein-coding	chr8:23296897-23404209	-	hsa:4017	lysyl oxidase-like 2	1.04444	8.93366e-17	759	844	1682	1749
PLEKHA6	protein-coding	chr1:204218853-204307438	-	hsa:22874	pleckstrin homology domain containing, family A member 6	0.856454	1.4386e-06	381	383	750	691
TUBA4A	protein-coding	chr2:219249711-219253946	-	hsa:7277	tubulin, alpha 4a	0.653971	6.43118e-10	2207	2478	3545	4119
ARL2-SNX15	ncRNA	chr11:65014113-65040572	+	hsa:100528018	ARL2-SNX15 readthrough (NMD candidate)	0.629925	0.000228663	459	487	665	863
PPP4R1-AS1	lncRNA	chr18:9614807-9619363	+	hsa:101927323	PPP4R1 antisense RNA 1	2.74524	0.0395644	1	3	11	16
DHRS1	protein-coding	chr14:24290598-24299833	-	hsa:115817	dehydrogenase/reductase (SDR family) member 1	-0.663183	0.00934256	180	285	142	157
POU2F1	protein-coding	chr1:167220886-167427345	+	hsa:5451	POU class 2 homeobox 1	-0.714191	9.8456e-08	882	1232	649	671
SMIM10L2B	lncRNA	chrx:135094985-135098634	-	hsa:644596	long intergenic non-protein coding RNA 87	1.38071	0.0260502	22	13	53	44
SEPP1	protein-coding	chr5:42799880-42811922	-	hsa:6414	selenoprotein P, plasma, 1	0.890311	0.00918021	66	71	124	140
SLC27A2	protein-coding	chr15:50182196-50236392	+	hsa:11001	solute carrier family 27 (fatty acid transporter), member 2	-0.759337	0.000328161	285	428	207	223
ADRA2B	protein-coding	chr2:96112875-96116245	-	hsa:151	adrenoceptor alpha 2B	1.78166	0.00162361	27	12	66	79
ORC5	protein-coding	chr7:104126341-104208041	-	hsa:5001	origin recognition complex, subunit 5	-0.658501	0.000200052	501	821	380	472
SEPT3	protein-coding	chr22:41976927-41998221	+	hsa:55964	septin 3	0.761827	1.89641e-08	505	687	1002	1073
SEPT4	protein-coding	chr17:58520255-58532070	-	hsa:5414	septin 4	0.690863	0.0139993	98	160	233	189
ATP8B3	protein-coding	chr19:1782070-1812237	-	hsa:148229	ATPase, aminophospholipid transporter, class I, type 8B, member 3	1.18528	4.16106e-12	335	339	763	836
ATP8B1	protein-coding	chr18:57646426-57803095	-	hsa:5205	ATPase, aminophospholipid transporter, class I, type 8B, member 1	-1.66336	5.48249e-10	219	342	95	85
RNPC3	protein-coding	chr1:103525956-103555239	+	hsa:55599	RNA-binding region (RNP1, RRM) containing 3	-1.30746	0.0032841	63	108	34	36
PLEKHF1	protein-coding	chr19:29665422-29675477	+	hsa:79156	pleckstrin homology domain containing, family F (with FYVE domain) member 1	0.591483	0.0109717	165	191	257	299
C18orf21	protein-coding	chr18:35972625-35979287	+	hsa:83608	chromosome 18 open reading frame 21	-0.651995	0.0147341	193	222	146	127
PLEKHG1	protein-coding	chr6:150632943-150843665	+	hsa:57480	pleckstrin homology domain containing, family G (with RhoGef domain) member 1	0.701818	0.0436435	84	81	110	172
PLEKHG2	protein-coding	chr19:39413110-39428415	+	hsa:64857	pleckstrin homology domain containing, family G (with RhoGef domain) member 2	1.11645	9.54573e-15	398	537	1062	1017
INAFM1	protein-coding	chr19:47274402-47275723	+	hsa:255783	InaF-motif containing 1	0.713062	0.00142239	180	214	356	310
PLEKHO1	protein-coding	chr1:150149434-150160065	+	hsa:51177	pleckstrin homology domain containing, family O member 1	0.767919	0.00946379	85	126	201	165
PLEKHO2	protein-coding	chr15:64841883-64868002	+	hsa:80301	pleckstrin homology domain containing, family O member 2	0.680242	1.10875e-05	402	514	692	822
SH3PXD2A	protein-coding	chr10:103594027-103855454	-	hsa:9644	SH3 and PX domains 2A	0.744014	3.70456e-09	681	1001	1433	1444
RAMP1	protein-coding	chr2:237858714-237912114	+	hsa:10267	receptor (G protein-coupled) activity modifying protein 1	0.774917	4.06051e-06	294	430	594	674
RNVU1-18	snRNA	chr1:143729407-143729570	-	hsa:26863	RNA, variant U1 small nuclear 18	1.65047	0.00435474	13	21	49	60
RNVU1-19	snRNA	chr1:120850819-120850985	-	hsa:101954277	RNA, variant U1 small nuclear 19	0.939874	1.28166e-10	527	783	1118	1456
RNVU1-14	snRNA	chr1:145281116-145281279	+	hsa:101954266	RNA, variant U1 small nuclear 14	0.639833	0.000544687	317	501	547	755
RNVU1-15	snRNA	chr1:144412576-144412740	+	hsa:101954267	RNA, variant U1 small nuclear 15	1.16043	5.4169e-07	134	157	304	370
DMAP1	protein-coding	chr1:44213453-44220679	+	hsa:55929	DNA methyltransferase 1 associated protein 1	0.726394	3.07167e-05	273	365	537	547
ARAP3	protein-coding	chr5:141653401-141682197	-	hsa:64411	ArfGAP with RhoGAP domain, ankyrin repeat and PH domain 3	0.602552	6.8827e-05	504	567	851	834
HSP90AB3P	pseudo	chr4:87891748-87894288	+		heat shock protein 90kDa alpha (cytosolic), class B member 3, pseudogene	-0.651307	0.00593565	246	291	186	167
B4GALNT1	protein-coding	chr12:57625895-57633239	-	hsa:2583	beta-1,4-N-acetyl-galactosaminyl transferase 1	0.737036	4.02145e-09	692	896	1378	1343
PSMC6	protein-coding	chr14:52707163-52727996	+	hsa:5706	proteasome (prosome, macropain) 26S subunit, ATPase, 6	-0.653605	0.00140982	369	704	341	345
PSMA2	protein-coding	chr7:42916861-42932206	-	hsa:5683	proteasome (prosome, macropain) subunit, alpha type, 2	-0.807005	3.51642e-06	589	1031	477	458
ALPPL2	protein-coding	chr2:232406842-232410714	+	hsa:251	alkaline phosphatase, placental-like 2	5.80907	0.000395003	0	1	37	20
SESN1	protein-coding	chr6:108986437-109008988	-	hsa:27244	sestrin 1	-0.678683	0.0118041	234	246	179	132
BMP1	protein-coding	chr8:22165140-22201483	+	hsa:649	bone morphogenetic protein 1	0.593987	4.35304e-06	848	986	1301	1571
BMP7	protein-coding	chr20:57168753-57266651	-	hsa:655	bone morphogenetic protein 7	0.872368	0.00530959	158	99	243	261
ZCCHC8	protein-coding	chr12:122472893-122500989	-	hsa:55596	zinc finger, CCHC domain containing 8	-0.718355	0.000327697	327	452	246	239
RNU12	snRNA	chr22:42615245-42615393	+	hsa:267010	RNA, U12 small nuclear	0.842686	6.77737e-06	298	443	559	804
RNU11	snRNA	chr1:28648600-28648734	+	hsa:26824	RNA, U11 small nuclear	0.891804	0.000176705	158	298	349	508
LOC101929634	ncRNA	chr14:104661120-104665558	-	hsa:101929634	uncharacterized LOC101929634	1.12113	0.0387716	21	29	65	46
FZD3	protein-coding	chr8:28519111-28564440	+	hsa:7976	frizzled class receptor 3	-1.01119	0.00185352	128	298	91	120
FZD9	protein-coding	chr7:73433779-73436120	+	hsa:8326	frizzled class receptor 9	1.34656	0.0307491	15	18	36	51
SLC1A3	protein-coding	chr5:36606355-36688334	+	hsa:6507	solute carrier family 1 (glial high affinity glutamate transporter), member 3	-2.05656	0.00012936	56	82	14	20
TELO2	protein-coding	chr16:1493704-1510459	+	hsa:9894	telomere maintenance 2	0.777024	1.07867e-06	659	621	1143	1155
SEPT5-GP1BB	ncRNA	chr22:19717220-19724774	+	hsa:100526833	SEPT5-GP1BB readthrough	0.583726	0.00181027	242	341	421	475
CYP4F3	protein-coding	chr19:15640897-15660760	+	hsa:4051	cytochrome P450, family 4, subfamily F, polypeptide 3	2.00968	0.00249197	8	14	45	45
FZR1	protein-coding	chr19:3522956-3536756	+	hsa:51343	fizzy/cell division cycle 20 related 1 (Drosophila)	0.700669	1.58037e-11	1645	1898	2884	3084
SLC29A4	protein-coding	chr7:5274311-5304060	+	hsa:222962	solute carrier family 29 (equilibrative nucleoside transporter), member 4	0.651271	0.000322158	361	366	598	592
NPEPL1	protein-coding	chr20:58689131-58715844	+	hsa:79716	aminopeptidase-like 1	0.608807	0.00618063	228	223	326	394
LOC105378159	protein-coding	chr6:130288003-130386905	-		uncharacterized LOC105378159	-2.55208	0.0103966	10	45	6	3
C21orf91	protein-coding	chr21:17788967-17819386	-	hsa:54149	chromosome 21 open reading frame 91	-0.719544	0.00679919	234	248	124	182
LOC102724951	protein-coding	chr21:7430637-7469008	+	hsa:102724951	uncharacterized LOC102724951	-5.46223	0.0115972	6	10	0	0
REXO1	protein-coding	chr19:1817745-1848683	-	hsa:57455	REX1, RNA exonuclease 1 homolog (S. cerevisiae)	0.751491	0.000693732	157	214	295	347
IGSF9	protein-coding	chr1:159927039-159945596	-	hsa:57549	immunoglobulin superfamily, member 9	-0.730508	0.0313638	98	216	94	95
TMEM200A	protein-coding	chr6:130366281-130443067	+	hsa:114801	transmembrane protein 200A	-1.0903	7.12792e-09	425	542	224	244
DHX15	protein-coding	chr4:24527464-24584561	-	hsa:1665	DEAH (Asp-Glu-Ala-His) box helicase 15	-0.610154	4.17196e-08	2137	3243	1807	1782
DHX32	protein-coding	chr10:125836337-125896481	-	hsa:55760	DEAH (Asp-Glu-Ala-His) box polypeptide 32	-0.710425	1.52508e-07	1316	1876	1079	911
MAPK8IP2	protein-coding	chr22:50600685-50611551	+	hsa:23542	mitogen-activated protein kinase 8 interacting protein 2	1.41811	1.47153e-12	161	223	558	492
MAPK8IP1	protein-coding	chr11:45885496-45906465	+	hsa:9479	mitogen-activated protein kinase 8 interacting protein 1	0.800769	2.25203e-08	441	561	876	922
LOC105378085	lncRNA	chr6:159586909-159595641	-		uncharacterized LOC105378085	-5.58323	0.00820547	8	9	0	0
TBX1	protein-coding	chr22:19758777-19767334	+	hsa:6899	T-box 1	1.1628	0.0236334	26	28	71	54
MGC27345	ncRNA	chr7:128297685-128307763	-	hsa:157247	uncharacterized protein MGC27345	-0.703729	0.0258583	112	204	94	102
RPL26P19	pseudo	chr5:56504592-56505114	-		ribosomal protein L26 pseudogene 19	-0.655897	0.000218708	625	682	466	394
CGREF1	protein-coding	chr2:27099353-27119127	-	hsa:10669	cell growth regulator with EF-hand domain 1	-1.65429	0.0272418	42	54	3	29
NECTIN4	protein-coding					-2.84117	0.000784724	49	23	4	7
SPRED3	protein-coding	chr19:38390063-38399587	+	hsa:399473	sprouty-related, EVH1 domain containing 3	1.24149	0.000432299	49	63	144	128
CYP2S1	protein-coding	chr19:41193238-41207539	+	hsa:29785	cytochrome P450, family 2, subfamily S, polypeptide 1	0.755659	3.1158e-09	675	843	1339	1301
CYP2R1	protein-coding	chr11:14878005-14891629	-	hsa:120227	cytochrome P450, family 2, subfamily R, polypeptide 1	-0.75519	0.0152965	150	174	113	85
CDR2L	protein-coding	chr17:74987647-75005800	+	hsa:30850	cerebellar degeneration-related protein 2-like	0.819488	2.78575e-11	855	1131	1886	1709
TCN1	protein-coding	chr11:59852808-59866568	-	hsa:6947	transcobalamin I (vitamin B12 binding protein, R binder family)	-2.30806	0.00767507	19	40	4	8
TCN2	protein-coding	chr22:30607083-30627060	+	hsa:6948	transcobalamin II	0.749032	0.024019	80	80	126	155
CYP2J2	protein-coding	chr1:59893308-59926798	-	hsa:1573	cytochrome P450, family 2, subfamily J, polypeptide 2	-2.07191	0.0138643	24	34	10	4
RAP2B	protein-coding	chr3:153162212-153170624	+	hsa:5912	RAP2B, member of RAS oncogene family	-0.696047	2.73408e-10	1985	2844	1554	1491
ZMAT1	protein-coding	chrx:101882288-101932066	-	hsa:84460	zinc finger, matrin-type 1	2.76441	0.0202067	0	6	22	17
ZMAT5	protein-coding	chr22:29730956-29766980	-	hsa:55954	zinc finger, matrin-type 5	0.711021	4.0983e-05	395	495	627	881
OSBPL10	protein-coding	chr3:31660825-31981850	-	hsa:114884	oxysterol binding protein-like 10	-0.888817	7.36609e-07	505	669	350	300
MIR626	ncRNA	chr15:41691585-41691678	+	hsa:693211	microRNA 626	-5.06191	0.0310024	5	7	0	0
DMBT1	protein-coding	chr10:122560677-122643736	+	hsa:1755	deleted in malignant brain tumors 1	5.78437	0.00413764	0	0	11	10
BPGM	protein-coding	chr7:134660421-134679816	+	hsa:669	2,3-bisphosphoglycerate mutase	-0.803749	0.0129139	117	169	73	95
NDUFS5	protein-coding	chr1:39026295-39034636	+	hsa:4725	NADH dehydrogenase (ubiquinone) Fe-S protein 5, 15kDa (NADH-coenzyme Q reductase)	-0.657736	3.09559e-05	1114	1913	820	1128
LOC613206	miscRNA	chr9:124258585-124261417	-		myeloproliferative disease associated tumor antigen 5	5.55123	0.0084196	0	0	7	11
MBNL3	protein-coding	chrx:132372002-132489038	-	hsa:55796	muscleblind-like splicing regulator 3	-1.59063	2.75674e-07	186	220	56	84
LOC101929846	ncRNA	chr10:63630297-63655769	+	hsa:101929846	uncharacterized LOC101929846	1.99355	0.00306026	10	14	30	69
LOC105373882	lncRNA	chr2:218894010-218897051	-		uncharacterized LOC105373882	2.37103	0.020301	6	2	17	28
PSRC1	protein-coding	chr1:109279556-109283144	-	hsa:84722	proline/serine-rich coiled-coil 1	0.613263	1.2403e-08	1083	1422	1892	2050
ZNF385A	protein-coding	chr12:54369129-54384730	-	hsa:25946	zinc finger protein 385A	1.34771	7.72516e-34	948	1224	2939	2741
GTF2E2	protein-coding	chr8:30578516-30655184	-	hsa:2961	general transcription factor IIE, polypeptide 2, beta 34kDa	-0.638309	3.09407e-06	827	1074	626	630
GLRX2	protein-coding	chr1:193096465-193105478	-	hsa:51022	glutaredoxin 2	-1.76204	0.000101027	97	103	39	22
TEFM	protein-coding	chr17:30898983-30906268	-	hsa:79736	transcription elongation factor, mitochondrial	-0.673822	0.0475381	118	124	76	82
TMEM106A	protein-coding	chr17:43211852-43220041	+	hsa:113277	transmembrane protein 106A	0.805183	0.0106965	81	87	148	157
ILDR1	protein-coding	chr3:121987323-122022280	-	hsa:286676	immunoglobulin-like domain containing receptor 1	-1.60838	0.00967145	39	50	16	14
ILDR2	protein-coding	chr1:166913204-166973590	-	hsa:387597	immunoglobulin-like domain containing receptor 2	-1.51283	0.00184972	59	86	24	28
MTERF3	protein-coding	chr8:96239398-96261613	-	hsa:51001	mitochondrial transcription termination factor 3	-0.661242	0.00408098	298	605	251	323
TESC	protein-coding	chr12:117038923-117093688	-	hsa:54997	tescalcin	0.621718	0.000304141	302	378	520	559
BRF1	protein-coding	chr14:105209286-105247885	-	hsa:2972	BRF1, RNA polymerase III transcription initiation factor 90 kDa subunit	0.605846	9.30486e-05	516	554	851	841
LOC105373759	protein-coding	chr2:177211394-177212621	-		uncharacterized LOC105373759	0.908549	0.000532898	96	156	240	241
H3F3A	protein-coding	chr1:226062707-226072002	+	hsa:3020	H3 histone, family 3A	-1.00699	0.0115106	79	111	44	53
C16orf45	protein-coding	chr16:15434491-15588259	+	hsa:89927	chromosome 16 open reading frame 45	2.32589	0.020708	1	10	14	40
KLF4	protein-coding	chr9:107484852-107489720	-	hsa:9314	Kruppel-like factor 4 (gut)	-1.30364	7.51306e-13	502	765	239	285
LOC107985381	protein-coding					5.56449	0.00802983	0	0	10	8
LOC107985343	lncRNA					1.57092	0.0481809	8	10	29	26
KLK1	protein-coding	chr19:50819146-50823787	-	hsa:3816	kallikrein 1	1.04958	0.0469567	21	31	55	55
KLK5	protein-coding	chr19:50943303-50953088	-	hsa:25818	kallikrein-related peptidase 5	-2.23414	0.00661563	34	29	10	4
KLK8	protein-coding	chr19:50996008-51001702	-	hsa:11202	kallikrein-related peptidase 8	-0.59671	0.0057479	277	347	196	230
KLK7	protein-coding	chr19:50976479-50984064	-	hsa:5650	kallikrein-related peptidase 7	-0.604159	0.0123118	226	272	176	162
MIR3176	ncRNA	chr16:543277-543366	+	hsa:100423037	microRNA 3176	4.83871	0.047408	0	0	4	7
MIR3188	ncRNA	chr19:18282077-18282161	+	hsa:100422833	microRNA 3188	5.61477	0.00805412	0	0	4	15
LOC107985303	lncRNA					1.34924	0.0320183	33	10	52	69
TADA1	protein-coding	chr1:166856510-166876417	-	hsa:117143	transcriptional adaptor 1	-0.605595	0.000187517	562	895	469	505
RNU1-120P	ncRNA	chr1:148263476-148263632	+		RNA, U1 small nuclear 120, pseudogene	0.824679	0.000167415	168	200	340	333
GTF2IP14	ncRNA	chr7:65084103-65100232	+		general transcription factor IIi pseudogene 14	1.39298	0.0331966	12	17	39	39
TFPI	protein-coding	chr2:187478578-187554492	-	hsa:7035	tissue factor pathway inhibitor (lipoprotein-associated coagulation inhibitor)	-1.13755	2.88915e-06	289	318	153	133
LPAR5	protein-coding	chr12:6618835-6636131	-	hsa:57121	lysophosphatidic acid receptor 5	0.780882	0.00154898	116	189	260	273
TAGLN	protein-coding	chr11:117199324-117204792	+	hsa:6876	transgelin	0.89783	0.0117903	50	98	116	163
KYAT3	protein-coding					-0.747765	0.000716013	303	486	264	212
CCDC183-AS1	ncRNA	chr9:136803927-136808848	-	hsa:100131193	CCDC183 antisense RNA 1	2.38811	0.0225893	7	1	27	19
VEGFB	protein-coding	chr11:64234584-64239264	+	hsa:7423	vascular endothelial growth factor B	0.627029	0.000212294	421	435	682	695
RPS2P55	pseudo	chrx:40934939-40935887	-		ribosomal protein S2 pseudogene 55	-0.693032	0.00775691	182	294	131	169
SNTB1	protein-coding	chr8:120535745-120812069	-	hsa:6641	syntrophin, beta 1 (dystrophin-associated protein A1, 59kDa, basic component 1)	-1.13256	0.0360665	42	71	31	21
TGFA	protein-coding	chr2:70447280-70554015	-	hsa:7039	transforming growth factor, alpha	-0.862717	2.33637e-08	1165	1882	939	756
GAB2	protein-coding	chr11:78215296-78318214	-	hsa:9846	GRB2-associated binding protein 2	1.1874	2.61796e-11	211	299	578	612
TESK1	protein-coding	chr9:35605284-35610041	+	hsa:7016	testis-specific kinase 1	0.613052	0.00298925	214	262	393	357
GAB3	protein-coding	chrx:154675249-154751583	-	hsa:139716	GRB2-associated binding protein 3	1.38237	0.0175819	22	18	66	43
LOC107985414	lncRNA					4.98832	0.0351574	0	0	8	4
SAMD3	protein-coding	chr6:130142684-130215294	-	hsa:154075	sterile alpha motif domain containing 3	-2.24657	0.0234795	19	22	3	6
SAMD1	protein-coding	chr19:14088417-14090420	-	hsa:90378	sterile alpha motif domain containing 1	0.594737	1.05449e-06	1405	1698	2594	2235
SAMD5	protein-coding	chr6:147508692-147570021	+	hsa:389432	sterile alpha motif domain containing 5	2.70613	1.21377e-14	22	41	196	222
TGM1	protein-coding	chr14:24249114-24263210	-	hsa:7051	transglutaminase 1	1.32609	0.0351264	21	13	41	50
TGM2	protein-coding	chr20:38127387-38165429	-	hsa:7052	transglutaminase 2	3.18287	2.07906e-202	500	591	5075	5158
MYO15B	protein-coding	chr17:75587545-75619454	+	hsa:80022	myosin XVB pseudogene	1.05189	0.00107343	65	85	172	147
GRIN2D	protein-coding	chr19:48394875-48444931	+	hsa:2906	glutamate receptor, ionotropic, N-methyl D-aspartate 2D	0.746399	3.57982e-05	530	623	1164	827
GRIN2B	protein-coding	chr12:13537337-13608679	-	hsa:2904	glutamate receptor, ionotropic, N-methyl D-aspartate 2B	-0.729454	0.000151903	389	459	261	268
DRAXIN	protein-coding	chr1:11691724-11720279	+	hsa:374946	dorsal inhibitory axon guidance protein	1.84761	2.87127e-06	25	46	127	132
GAS5	ncRNA	chr1:173863901-173867987	-	hsa:60674	growth arrest-specific 5 (non-protein coding)	-0.714007	6.02627e-07	815	1147	634	589
GART	protein-coding	chr21:33503931-33542892	-	hsa:2618	phosphoribosylglycinamide formyltransferase, phosphoribosylglycinamide synthetase, phosphoribosylaminoimidazole synthetase	-1.36882	2.29953e-19	761	993	333	366
RASD1	protein-coding	chr17:17494437-17496395	-	hsa:51655	RAS, dexamethasone-induced 1	5.00717	0.00442136	1	0	13	21
RASD2	protein-coding	chr22:35541507-35554003	+	hsa:23551	RASD family, member 2	0.777025	0.0101287	74	116	159	173
RASA3	protein-coding	chr13:113977787-114074627	-	hsa:22821	RAS p21 protein activator 3	0.768552	0.040362	46	85	121	104
CYSRT1	protein-coding	chr9:137224635-137226311	+	hsa:375791	cysteine-rich tail protein 1	-1.44203	0.0318182	44	35	10	21
CAMK2N2	protein-coding	chr3:184259215-184261463	-	hsa:94032	calcium/calmodulin-dependent protein kinase II inhibitor 2	1.81508	0.000729916	11	31	76	71
LOC107985564	lncRNA					3.15832	0.0326571	0	3	13	13
SNRPE	protein-coding	chr1:203861585-203871152	+	hsa:6635	small nuclear ribonucleoprotein polypeptide E	-0.69621	9.99099e-06	620	961	499	494
THRB	protein-coding	chr3:24119496-24495027	-	hsa:7068	thyroid hormone receptor, beta	-2.72462	0.00242546	27	30	3	6
ARL15	protein-coding	chr5:53883942-54310425	-	hsa:54622	ADP-ribosylation factor-like 15	-0.861718	0.00454298	134	185	88	92
NXPE3	protein-coding	chr3:101779442-101828231	+	hsa:91775	neurexophilin and PC-esterase domain family, member 3	0.649196	0.00231096	196	326	445	384
NMNAT2	protein-coding	chr1:183248237-183418499	-	hsa:23057	nicotinamide nucleotide adenylyltransferase 2	5.97843	0.00222066	0	0	13	11
GBX1	protein-coding	chr7:151148009-151167191	-	hsa:2636	gastrulation brain homeobox 1	2.6368	9.96229e-06	5	19	75	73
LINC01012	ncRNA	chr6:27694035-27710222	+	hsa:100507173	long intergenic non-protein coding RNA 1012	-0.90655	0.0467933	73	92	59	31
TMEM151A	protein-coding	chr11:66291902-66296664	+	hsa:256472	transmembrane protein 151A	1.47879	3.79117e-06	76	72	248	181
NXPH4	protein-coding	chr12:57216795-57226449	+	hsa:11247	neurexophilin 4	0.597955	0.000160157	367	552	691	729
ZNF703	protein-coding	chr8:37695751-37700021	+	hsa:80139	zinc finger protein 703	1.22888	0.000239332	61	79	195	141
ZNF704	protein-coding	chr8:80628451-80874781	-	hsa:619279	zinc finger protein 704	-0.773576	3.64164e-06	582	894	462	416
GCC2	protein-coding	chr2:108449209-108509398	+	hsa:9648	GRIP and coiled-coil domain containing 2	0.611663	0.0202033	107	182	220	228
ZNF628	protein-coding	chr19:55476603-55484487	+	hsa:89887	zinc finger protein 628	0.902329	0.000152127	137	165	303	279
LOC255187	ncRNA	chr5:149063317-149109787	+	hsa:255187	uncharacterized LOC255187	6.43095	0.000437381	0	0	15	18
GCH1	protein-coding	chr14:54842005-54902824	-	hsa:2643	GTP cyclohydrolase 1	-0.61537	0.00148618	383	639	303	375
ARL4A	protein-coding	chr7:12686827-12690934	+	hsa:10124	ADP-ribosylation factor-like 4A	-0.712404	0.00118975	271	392	218	195
NOVA2	protein-coding	chr19:45936366-45962680	-	hsa:4858	neuro-oncological ventral antigen 2	1.81237	2.30823e-16	125	195	646	495
ARL4C	protein-coding	chr2:234493041-234497049	-	hsa:10123	ADP-ribosylation factor-like 4C	2.20391	1.25496e-23	90	179	641	608
ARL4D	protein-coding	chr17:43399116-43401136	+	hsa:379	ADP-ribosylation factor-like 4D	0.733186	0.000321359	213	366	431	547
NFKBID	protein-coding	chr19:35887630-35899232	-	hsa:84807	nuclear factor of kappa light polypeptide gene enhancer in B-cells inhibitor, delta	0.777861	0.0116752	73	104	148	163
BVES	protein-coding	chr6:105096822-105137174	-	hsa:11149	blood vessel epicardial substance	0.943158	0.00621249	59	76	115	153
FHOD1	protein-coding	chr16:67229389-67247522	-	hsa:29109	formin homology 2 domain containing 1	-1.1902	1.59786e-13	622	893	335	344
ZNF608	protein-coding	chr5:124636917-124745112	-	hsa:57507	zinc finger protein 608	-1.72784	1.48053e-07	164	190	47	64
SSBP4	protein-coding	chr19:18419336-18434562	+	hsa:170463	single stranded DNA binding protein 4	0.596266	4.51048e-08	1044	1371	1835	1919
ZNF516	protein-coding	chr18:76358190-76494815	-	hsa:9658	zinc finger protein 516	-0.920396	2.02342e-10	778	981	466	492
ZNF579	protein-coding	chr19:55577078-55580821	-	hsa:163033	zinc finger protein 579	0.682006	0.000357086	296	419	656	514
ZNF575	protein-coding	chr19:43531805-43536090	+	hsa:284346	zinc finger protein 575	2.44212	0.010309	7	2	27	26
OR51K1P	pseudo	chr11:5430656-5431602	-		olfactory receptor, family 51, subfamily K, member 1 pseudogene	-1.67359	0.0163284	38	41	7	19
NOTUM	protein-coding	chr17:81952507-81961181	-	hsa:147111	notum pectinacetylesterase homolog (Drosophila)	1.417	2.16304e-14	210	231	607	614
ZNF550	protein-coding	chr19:57541836-57561512	-	hsa:162972	zinc finger protein 550	-2.2203	0.00748755	28	30	5	8
TNNC1	protein-coding	chr3:52451091-52454041	-	hsa:7134	troponin C type 1 (slow)	2.47843	6.85645e-10	19	32	134	156
NKAIN1	protein-coding	chr1:31179745-31239887	-	hsa:79570	Na+/K+ transporting ATPase interacting 1	1.3269	0.000434922	36	69	113	154
ZNF595	protein-coding	chr4:53285-88211	+	hsa:152687	zinc finger protein 595	-3.39552	0.0122343	9	23	2	1
RPL17P42	pseudo	chr17:35719907-35720426	+		ribosomal protein L17 pseudogene 42	5.08754	0.0273303	0	0	6	7
PRKCDBP	protein-coding	chr11:6318946-6320510	-	hsa:112464	protein kinase C, delta binding protein	1.06591	1.44785e-14	426	574	1064	1085
RPL17P39	pseudo	chr15:71341123-71341747	-		ribosomal protein L17 pseudogene 39	-0.815947	0.0361889	75	117	56	55
EPS8L3	protein-coding	chr1:109750080-109764022	-	hsa:79574	EPS8-like 3	4.79927	0.000250814	2	0	37	22
MAP7D1	protein-coding	chr1:36155965-36180849	+	hsa:55700	MAP7 domain containing 1	0.71234	2.05447e-13	2200	2586	3859	4264
RPS27AP12	pseudo	chr7:157192326-157192862	+		ribosomal protein S27a pseudogene 12	-5.03229	0.0335907	4	8	0	0
RNU6-2	snRNA	chr19:1021522-1021628	+		RNA, U6 small nuclear 2	0.7193	0.00597823	156	146	229	293
IL1RAPL1	protein-coding	chrx:28587564-29955900	+	hsa:11141	interleukin 1 receptor accessory protein-like 1	-2.06343	0.0218345	19	30	4	8
NOXO1	protein-coding	chr16:1978917-1981549	-	hsa:124056	NADPH oxidase organizer 1	1.21722	0.00074261	45	63	115	143
DIAPH2-AS1	lncRNA	chrx:97528364-97564535	-		DIAPH2 antisense RNA 1	-5.58323	0.00820547	8	9	0	0
USP46-AS1	ncRNA	chr4:52659406-52661498	+	hsa:643783	USP46 antisense RNA 1	5.09365	0.0269903	0	0	7	6
LOC255308	pseudo	chr12:10505883-10508527	+		eukaryotic translation initiation factor 2, subunit 3 gamma, 52kDa pseudogene	-0.66582	0.0111886	173	312	147	162
EVA1A	protein-coding	chr2:75492318-75569722	-	hsa:84141	eva-1 homolog A (C. elegans)	-2.36329	0.00284437	33	41	3	12
POLG2	protein-coding	chr17:64477785-64497066	-	hsa:11232	polymerase (DNA directed), gamma 2, accessory subunit	-0.761554	0.0084253	163	190	96	120
EVA1B	protein-coding	chr1:36322030-36323648	-	hsa:55194	eva-1 homolog B (C. elegans)	0.946331	1.44164e-05	216	203	397	449
RTN4RL1	protein-coding	chr17:1934677-2025345	-	hsa:146760	reticulon 4 receptor-like 1	0.912412	1.07628e-05	184	217	388	392
RTN4RL2	protein-coding	chr11:57460537-57477539	+	hsa:349667	reticulon 4 receptor-like 2	0.921938	8.44518e-06	252	386	712	514
ZNF865	protein-coding	chr19:55613593-55618545	+	hsa:100507290	zinc finger protein 865	0.80185	0.00104077	248	265	568	356
LOC100126784	ncRNA	chr11:19710934-19714672	-	hsa:100126784	uncharacterized LOC100126784	4.86759	0.0463322	0	0	8	3
BCL2L15	protein-coding	chr1:113876814-113887547	-	hsa:440603	BCL2-like 15	3.3018	0.000657319	2	4	32	28
NTF6B	pseudo	chr19:49038234-49039138	-		neurotrophin 6 beta (pseudogene)	5.23309	0.00257894	1	0	28	11
TLE2	protein-coding	chr19:2997638-3029109	-	hsa:7089	transducin-like enhancer of split 2	0.795547	2.86007e-10	632	842	1314	1313
B3GALT5-AS1	lncRNA	chr21:39605599-39612822	-	hsa:114041	B3GALT5 antisense RNA 1	2.48046	0.0087892	6	3	18	36
CHORDC1	protein-coding	chr11:90200433-90223267	-	hsa:26973	cysteine and histidine-rich domain (CHORD) containing 1	-0.653609	0.000304301	727	685	433	510
LOC105373957	lncRNA	chr2:237485700-237487163	-		uncharacterized LOC105373957	5.08754	0.0273303	0	0	6	7
TLL2	protein-coding	chr10:96364606-96513926	-	hsa:7093	tolloid-like 2	1.58863	0.0145627	14	13	38	47
KRT7	protein-coding	chr12:52233170-52248925	+	hsa:3855	keratin 7, type II	-1.30505	2.42117e-08	383	371	145	175
LOC105373968	lncRNA	chr2:240252144-240256433	-		uncharacterized LOC105373968	2.55955	8.59457e-07	17	12	87	93
LOC105373928	lncRNA	chr2:231611766-231613585	+		uncharacterized LOC105373928	1.36242	0.0445801	13	14	36	36
PXDC1	protein-coding	chr6:3722604-3751713	-	hsa:221749	PX domain containing 1	0.847238	0.000103364	156	272	385	395
SNX16	protein-coding	chr8:81800324-81842237	-	hsa:64089	sorting nexin 16	1.15907	0.0435531	22	20	51	47
ZNF784	protein-coding	chr19:55620741-55624575	-	hsa:147808	zinc finger protein 784	0.643985	0.0450465	84	107	176	130
SNX21	protein-coding	chr20:45833418-45838318	+	hsa:90203	sorting nexin family member 21	0.867126	2.67768e-07	291	371	581	664
LINC01405	lncRNA	chr12:110936602-110937448	+	hsa:100131138	long intergenic non-protein coding RNA 1405	-2.06419	5.39902e-05	70	79	17	20
LOC646736	ncRNA	chr2:226142794-226180062	+	hsa:646736	uncharacterized LOC646736	-3.00973	0.0258042	9	23	0	4
TMC5	protein-coding	chr16:19456450-19499113	+	hsa:79838	transmembrane channel-like 5	-1.0639	1.08585e-08	455	552	234	264
LOC105373018	lncRNA	chr22:36461083-36462804	-		uncharacterized LOC105373018	5.21449	0.0215094	0	0	10	4
SATB1	protein-coding	chr3:18345388-18425337	-	hsa:6304	SATB homeobox 1	-1.83291	6.46324e-05	72	106	26	25
LOC284023	ncRNA	chr17:7913322-7915947	-	hsa:284023	uncharacterized LOC284023	1.8862	0.0459572	5	6	20	22
CLDND1	protein-coding	chr3:98515473-98523066	-	hsa:56650	claudin domain containing 1	-0.656689	2.86501e-11	3436	4850	2749	2624
KSR1	protein-coding	chr17:27456458-27626437	+	hsa:8844	kinase suppressor of ras 1	2.50964	0.0351716	1	5	11	23
KSR2	protein-coding	chr12:117470335-117968558	-	hsa:283455	kinase suppressor of ras 2	-0.710064	0.000115982	634	982	576	425
GGCT	protein-coding	chr7:30496621-30504841	-	hsa:79017	gamma-glutamylcyclotransferase	-0.646603	0.0121125	187	235	133	145
LINC01468	lncRNA	chr10:52450877-52455272	-	hsa:101928687	long intergenic non-protein coding RNA 1468	1.93691	0.00144642	17	11	49	65
SMIM22	protein-coding	chr16:4788456-4796491	+	hsa:440335	small integral membrane protein 22	-2.8946	0.00105971	31	34	7	2
SMIM20	protein-coding	chr4:25914192-25929879	+	hsa:389203	small integral membrane protein 20	-0.68126	0.00557943	199	280	149	157
LOC284080	lncRNA	chr17:50050349-50055739	-	hsa:284080	uncharacterized LOC284080	1.78048	0.0127434	11	10	44	31
MTMR8	protein-coding	chrx:64268081-64395453	-	hsa:55613	myotubularin related protein 8	5.30498	0.0163597	0	0	9	6
LOC729683	ncRNA	chr17:63700338-63702685	+	hsa:729683	uncharacterized LOC729683	4.09208	0.0405542	1	0	11	7
PAK4	protein-coding	chr19:39167300-39179404	+	hsa:10298	p21 protein (Cdc42/Rac)-activated kinase 4	0.690814	7.45305e-13	2661	3060	4701	4870
LOC100287453	pseudo	chr19:49042072-49042928	+		neurotrophin 4 pseudogene	3.46977	0.0338147	2	0	18	6
PALM	protein-coding	chr19:708953-748330	+	hsa:5064	paralemmin	1.07763	1.05538e-19	666	903	1681	1717
GGT5	protein-coding	chr22:24219654-24245078	-	hsa:2687	gamma-glutamyltransferase 5	5.69936	0.000502061	1	0	32	22
GGT1	protein-coding	chr22:24603157-24629005	+	hsa:2678	gamma-glutamyltransferase 1	5.11194	0.0282559	0	0	10	3
PIP5K1C	protein-coding	chr19:3633437-3649945	-	hsa:23396	phosphatidylinositol-4-phosphate 5-kinase, type I, gamma	0.584944	4.01373e-07	922	1244	1675	1658
LOC100419814	pseudo	chr2:224499380-224500100	-		ankyrin repeat domain 49 pseudogene	5.10583	0.0273889	0	0	9	4
PATJ	protein-coding	chr1:61746868-62163506	+	hsa:10207	InaD-like (Drosophila)	-0.629799	0.00058564	455	512	323	325
PAX2	protein-coding	chr10:100732940-100829941	+	hsa:5076	paired box 2	1.34657	7.81304e-06	59	92	186	206
TNK2	protein-coding	chr3:195863364-195883281	-	hsa:10188	tyrosine kinase, non-receptor, 2	1.12904	1.26387e-08	272	270	666	568
LINC01338	lncRNA	chr5:82850864-82859836	-	hsa:102546175	long intergenic non-protein coding RNA 1338	-2.07967	0.00655742	26	60	16	4
SMG7-AS1	ncRNA	chr1:183460874-183471982	-	hsa:284649	SMG7 antisense RNA 1	2.80455	0.00128192	6	3	29	38
FAM19A3	protein-coding	chr1:112719003-112727235	+	hsa:284467	family with sequence similarity 19 (chemokine (C-C motif)-like), member A3	1.50426	0.0119138	17	17	57	43
LOC102606465	ncRNA	chr1:101025846-101087379	+	hsa:102606465	uncharterized LOC102606465	-1.05356	0.0464897	67	48	28	31
ABALON	lncRNA	chr20:31721507-31723409	+		apoptotic BCL2L1-antisense long non-coding RNA	2.0214	0.00147215	15	10	42	66
TNS3	protein-coding	chr7:47275154-47537400	-	hsa:64759	tensin 3	0.935075	1.52581e-08	324	377	695	691
TNS1	protein-coding	chr2:217799789-217846180	-	hsa:7145	tensin 1	1.00977	1.83206e-07	236	254	521	503
TNS2	protein-coding	chr12:53047273-53064372	+	hsa:23371	tensin like C1 domain containing phosphatase (tensin 2)	1.02785	0.000240642	96	106	194	234
MAP3K3	protein-coding	chr17:63622209-63693976	+	hsa:4215	mitogen-activated protein kinase kinase kinase 3	0.914541	0.032173	47	41	87	87
MAP3K1	protein-coding	chr5:56816695-56894496	+	hsa:4214	mitogen-activated protein kinase kinase kinase 1, E3 ubiquitin protein ligase	0.791668	7.4364e-06	393	388	713	698
GDAP1	protein-coding	chr8:74349251-74367113	+	hsa:54332	ganglioside induced differentiation associated protein 1	-0.75784	0.00104021	236	321	166	172
HIVEP3	protein-coding	chr1:41847189-41918825	-	hsa:59269	human immunodeficiency virus type I enhancer binding protein 3	1.06458	0.00198712	55	90	177	130
HIVEP1	protein-coding	chr6:12059291-12164999	+	hsa:3096	human immunodeficiency virus type I enhancer binding protein 1	-0.586574	0.00534715	285	376	231	221
MAP3K6	protein-coding	chr1:27355179-27366866	-	hsa:9064	mitogen-activated protein kinase kinase kinase 6	0.650699	4.28766e-05	406	624	740	912
MAP3K5	protein-coding	chr6:136557966-136793097	-	hsa:4217	mitogen-activated protein kinase kinase kinase 5	1.19119	6.75587e-06	98	115	262	240
GALNT5	protein-coding	chr2:157257548-157318491	+	hsa:11227	polypeptide N-acetylgalactosaminyltransferase 5	-0.843872	0.00351235	162	190	98	105
GALNT3	protein-coding	chr2:165747803-165794650	-	hsa:2591	polypeptide N-acetylgalactosaminyltransferase 3	-1.25295	7.52037e-05	142	182	68	72
RPL17P6	pseudo	chr1:77129074-77129703	+		ribosomal protein L17 pseudogene 6	-0.903078	0.0048329	137	153	77	84
RPL17P7	pseudo	chr1:108992254-108992871	+		ribosomal protein L17 pseudogene 7	-0.594185	5.51479e-05	705	954	513	617
UBASH3B	protein-coding	chr11:122655690-122814473	+	hsa:84959	ubiquitin associated and SH3 domain containing B	0.802122	1.93197e-15	1516	1818	2937	3072
PDLIM2	protein-coding	chr8:22580474-22594298	+	hsa:64236	PDZ and LIM domain 2 (mystique)	1.04108	3.89742e-12	438	522	1067	971
PDLIM7	protein-coding	chr5:177483394-177497601	-	hsa:9260	PDZ and LIM domain 7 (enigma)	0.631349	1.47471e-10	1696	2104	2873	3205
PDLIM5	protein-coding	chr4:94451942-94668223	+	hsa:10611	PDZ and LIM domain 5	1.37376	1.04784e-48	2455	3000	7467	7111
SARS2	protein-coding	chr19:38915264-38930896	-	hsa:54938	seryl-tRNA synthetase 2, mitochondrial	1.47424	0.0203802	15	34	105	29
CACTIN-AS1	ncRNA	chr19:3607247-3613930	+	hsa:404665	CACTIN antisense RNA 1	5.28307	0.00206231	0	1	17	23
ANKRD22	protein-coding	chr10:88819899-88851975	-	hsa:118932	ankyrin repeat domain 22	-3.14869	2.95194e-08	58	119	10	10
ANKRD34A	protein-coding	chr1:145959441-145964582	-	hsa:284615	ankyrin repeat domain 34A	1.2946	0.00824649	27	28	74	66
ANKRD29	protein-coding	chr18:23598926-23648740	-	hsa:147463	ankyrin repeat domain 29	-1.43399	0.009476	46	62	21	20
DENND5B	protein-coding	chr12:31382223-31590442	-	hsa:160518	DENN/MADD domain containing 5B	0.881055	0.000106599	142	257	348	396
DENND2A	protein-coding	chr7:140518418-140642209	-	hsa:27147	DENN/MADD domain containing 2A	4.23463	0.0297732	1	0	9	11
DDX3Y	protein-coding	chry:12903999-12920478	+	hsa:8653	DEAD (Asp-Glu-Ala-Asp) box helicase 3, Y-linked	-5.16607	0.0244945	5	8	0	0
RNVU1-7	snRNA	chr1:148038753-148038916	-	hsa:26864	RNA, variant U1 small nuclear 7	0.802557	0.00788038	81	101	165	162
TOP1	protein-coding	chr20:41028822-41124487	+	hsa:7150	topoisomerase (DNA) I	-0.634405	2.17514e-07	1712	1875	1145	1259
RNVU1-4	snRNA	chr1:120942600-120942763	+	hsa:101954264	RNA, variant U1 small nuclear 4	1.21853	0.000585147	56	66	116	179
RNVU1-6	snRNA	chr1:146052081-146052244	-	hsa:101954276	RNA, variant U1 small nuclear 6	0.86956	0.00020463	129	181	274	307
DDX24	protein-coding	chr14:94050922-94081212	-	hsa:57062	DEAD (Asp-Glu-Ala-Asp) box helicase 24	-1.98915	2.06964e-06	142	109	35	32
FAM198B	protein-coding	chr4:158124580-158173050	-	hsa:51313	family with sequence similarity 198, member B	-3.41566	0.0422013	13	7	2	0
LOC646471	ncRNA	chr1:25819954-25823606	-	hsa:646471	uncharacterized LOC646471	5.2944	0.0165502	0	0	7	8
TAOK2	protein-coding	chr16:29973641-29990756	+	hsa:9344	TAO kinase 2	0.660421	2.60265e-10	1299	1677	2264	2583
NKPD1	protein-coding	chr19:45150378-45162831	-	hsa:284353	NTPase, KAP family P-loop domain containing 1	2.11304	0.0439034	7	2	29	13
CDKN2B-AS1	ncRNA	chr9:21994791-22077890	+	hsa:100048912	CDKN2B antisense RNA 1	2.08397	0.0464492	2	7	16	22
GJA3	protein-coding	chr13:20138252-20161327	-	hsa:2700	gap junction protein, alpha 3, 46kDa	0.58665	0.00788277	166	223	293	307
HLA-DRA	protein-coding	chr6:32439842-32445046	+	hsa:3122	major histocompatibility complex, class II, DR alpha	-2.32452	0.0341628	5	43	6	3
FBRSL1	protein-coding	chr12:132490457-132585188	+	hsa:57666	fibrosin-like 1	1.31438	0.0318141	20	15	43	49
PDHB	protein-coding	chr3:58427630-58433852	-	hsa:5162	pyruvate dehydrogenase (lipoamide) beta	-0.658801	1.06553e-06	881	1215	688	672
TMEM184B	protein-coding	chr22:38219291-38272664	-	hsa:25829	transmembrane protein 184B	0.777828	8.9394e-10	1216	1600	2707	2240
LINC01031	lncRNA	chr1:193304745-193365953	+	hsa:101929184	long intergenic non-protein coding RNA 1031	-4.31227	0.0294852	10	9	1	0
MAP3K11	protein-coding	chr11:65597755-65614338	-	hsa:4296	mitogen-activated protein kinase kinase kinase 11	0.67989	2.58378e-10	1517	1741	2685	2722
MAP3K12	protein-coding	chr12:53480492-53501066	-	hsa:7786	mitogen-activated protein kinase kinase kinase 12	0.963076	1.36127e-09	367	431	735	877
MAP3K14	protein-coding	chr17:45263128-45317048	-	hsa:9020	mitogen-activated protein kinase kinase kinase 14	0.602735	0.000477331	338	411	527	650
CIITA	protein-coding	chr16:10866208-10916639	+	hsa:4261	class II, major histocompatibility complex, transactivator	4.96849	0.0358153	0	0	5	7
C2CD4D	protein-coding	chr1:151837863-151840557	-	hsa:100191040	C2 calcium-dependent domain containing 4D	4.60739	0.0133211	1	0	8	18
C2CD4C	protein-coding	chr19:405435-409128	-	hsa:126567	C2 calcium-dependent domain containing 4C	0.982118	0.000695899	97	100	181	225
LOC284578	ncRNA	chr1:205554273-205556635	-	hsa:284578	uncharacterized LOC284578	5.18611	0.0220938	0	0	5	9
C9orf69	protein-coding	chr9:136114581-136118885	-	hsa:90120	chromosome 9 open reading frame 69	0.660525	2.15033e-06	541	649	962	981
PEX3	protein-coding	chr6:143450781-143490616	+	hsa:8504	peroxisomal biogenesis factor 3	-0.622777	0.0317224	158	268	163	116
GLI2	protein-coding	chr2:120866789-120991265	+	hsa:2736	GLI family zinc finger 2	1.91567	5.12016e-21	141	184	691	566
TRNW	tRNA	chrmt:5512-5579	+	hsa:4578	tRNA	0.807953	0.0461	40	76	118	86
KLF16	protein-coding	chr19:1852399-1863565	-	hsa:83855	Kruppel-like factor 16	0.613422	3.71882e-07	1186	1492	2240	1973
FAM162A	protein-coding	chr3:122384176-122410114	+	hsa:26355	family with sequence similarity 162, member A	-0.789906	3.43973e-08	804	992	504	569
TSC2	protein-coding	chr16:2048202-2088720	+	hsa:7249	tuberous sclerosis 2	0.648015	1.13736e-09	1247	1515	2187	2283
HDAC10	protein-coding	chr22:50245183-50251405	-	hsa:83933	histone deacetylase 10	0.616729	0.0160774	174	203	352	243
IGF2BP2-AS1	lncRNA	chr3:185713252-185729787	+	hsa:646600	IGF2BP2 antisense RNA 1	4.96849	0.0358153	0	0	5	7
LOC105373289	protein-coding	chr1:227786801-227790470	+		collagen alpha-1(III) chain-like	1.99907	0.0015132	11	13	50	49
ARRB1	protein-coding	chr11:75260122-75312108	-	hsa:408	arrestin, beta 1	0.636468	2.07463e-08	944	1248	1753	1747
LOC105373264	lncRNA	chr1:244431303-244432537	-		uncharacterized LOC105373264	3.97252	0.0066558	2	0	17	17
KCNQ2	protein-coding	chr20:63400208-63472589	-	hsa:3785	potassium voltage-gated channel, KQT-like subfamily, member 2	0.744955	0.0071662	123	129	186	255
GMIP	protein-coding	chr19:19629476-19643601	-	hsa:51291	GEM interacting protein	0.719609	4.25496e-06	449	524	743	919
LOC107985092	lncRNA					-1.25699	0.0377594	49	39	18	21
FAM157A	protein-coding	chr3:198152366-198180857	+	hsa:728262	family with sequence similarity 157, member A	2.4131	0.0180086	2	7	34	13
LOC107985065	lncRNA					3.34507	0.00515593	4	0	19	26
LOC107985057	lncRNA					1.28715	0.0376209	26	13	41	62
PGM2	protein-coding	chr4:37826660-37862938	+	hsa:55276	phosphoglucomutase 2	-0.853751	4.92079e-06	409	585	291	271
RPL14P1	pseudo	chr12:62965302-62966024	+		ribosomal protein L14 pseudogene 1	-0.588388	0.000480138	608	1068	526	602
KLHDC8B	protein-coding	chr3:49171120-49176487	+	hsa:200942	kelch domain containing 8B	0.95122	1.94224e-06	195	232	421	432
CAPS	protein-coding	chr19:5913644-5916211	+	hsa:828	calcyphosine	1.91953	0.0123347	5	13	36	32
KCND3	protein-coding	chr1:111972414-111989327	-	hsa:3752	potassium voltage-gated channel, Shal-related subfamily, member 3	2.00848	0.00533705	15	6	33	59
RPL7P1	pseudo	chr5:150094285-150095114	+		ribosomal protein L7 pseudogene 1	-0.746054	3.22439e-09	1472	2313	1162	1131
CAV2	protein-coding	chr7:116499601-116508541	+	hsa:858	caveolin 2	-0.5807	1.07262e-05	974	1289	800	753
CAV1	protein-coding	chr7:116526358-116561185	+	hsa:857	caveolin 1, caveolae protein, 22kDa	-0.874651	1.93802e-19	5300	7649	3710	3497
LINC01503	lncRNA	chr9:129336923-129347477	+	hsa:100506119	long intergenic non-protein coding RNA 1503	1.50085	0.0465436	15	7	34	33
LOC107985193	lncRNA					-4.93815	0.0491358	1	11	0	0
MYADM	protein-coding	chr19:53868545-53876435	+	hsa:91663	myeloid-associated differentiation marker	0.719878	6.57978e-18	3538	4705	6889	7055
ROGDI	protein-coding	chr16:4796967-4802633	-	hsa:79641	rogdi homolog (Drosophila)	0.622229	0.00162047	271	281	430	455
CD47	protein-coding	chr3:108043094-108091088	-	hsa:961	CD47 molecule	-0.762415	1.31215e-06	580	791	410	419
CD68	protein-coding	chr17:7579487-7582111	+	hsa:968	CD68 molecule	0.608733	0.0054816	276	281	361	529
OBSCN	protein-coding	chr1:228208050-228378876	+	hsa:84033	obscurin, cytoskeletal calmodulin and titin-interacting RhoGEF	0.864777	0.00145703	94	133	216	207
PHYH	protein-coding	chr10:13277796-13300130	-	hsa:5264	phytanoyl-CoA 2-hydroxylase	-0.736623	0.00464931	224	232	144	141
EVI5L	protein-coding	chr19:7846500-7864976	+	hsa:115704	ecotropic viral integration site 5-like	0.665012	5.01776e-05	570	567	982	898
LOC105373095	lncRNA	chr22:50208461-50210174	-		uncharacterized LOC105373095	5.47529	0.010245	0	0	8	9
DRAM2	protein-coding	chr1:111117332-111140153	-	hsa:128338	DNA-damage regulated autophagy modulator 2	-0.683471	0.00019666	442	683	378	334
YBX1	protein-coding	chr1:42682987-42703803	+	hsa:4904	Y box binding protein 1	-0.639613	6.16205e-12	4416	6474	3464	3675
YBX2	protein-coding	chr17:7288252-7294557	-	hsa:51087	Y box binding protein 2	1.48838	0.0422048	16	8	42	30
YBX3	protein-coding	chr12:10699084-10723448	-	hsa:8531	Y box binding protein 3	-0.743697	6.80785e-13	3854	5936	2984	2963
CRSP8P	pseudo	chr5:80350605-80351966	-	hsa:441089	mediator complex subunit 27 pseudogene	0.784636	0.00780883	136	106	212	229
LOC102723393	ncRNA	nt_187499.1:76713-99918	-	hsa:102723393	uncharacterized LOC102723393	2.49951	0.0418402	3	2	11	19
PIGN	protein-coding	chr18:62044224-62187038	-	hsa:23556	phosphatidylinositol glycan anchor biosynthesis, class N	-0.624741	0.00870071	208	318	166	182
LOC102723323	ncRNA	chr16:51492570-51525949	-	hsa:102723323	uncharacterized LOC102723323	5.2944	0.0165502	0	0	7	8
CCT8	protein-coding	chr21:29056322-29073797	-	hsa:10694	chaperonin containing TCP1, subunit 8 (theta)	-0.628891	3.62583e-11	5463	8235	4469	4556
GPC1	protein-coding	chr2:240456277-240468076	+	hsa:2817	glypican 1	0.778363	9.65054e-05	198	256	398	403
LOC101928845	ncRNA	chr19:14333743-14343913	+	hsa:101928845	uncharacterized LOC101928845	1.49791	0.00345235	20	26	59	75
LOC101928841	protein-coding	chr13:113399610-113414393	-	hsa:101928841	collagen alpha-1(II) chain-like	1.66856	0.0324754	10	8	32	28
SOCS3	protein-coding	chr17:78356777-78360079	-	hsa:9021	suppressor of cytokine signaling 3	0.721952	1.32132e-09	761	981	1417	1542
LOC101928868	ncRNA	chr6:154510786-154522300	+	hsa:101928868	uncharacterized LOC101928868	-0.921429	0.0387169	60	88	36	44
LSM14A	protein-coding	chr19:34172447-34229515	+	hsa:26065	LSM14A, SCD6 homolog A (S. cerevisiae)	-2.85303	0.00430009	43	245	17	21
GPN3	protein-coding	chr12:110452548-110468835	-	hsa:51184	GPN-loop GTPase 3	-0.640099	0.0016743	335	438	272	237
MCCC2	protein-coding	chr5:71587288-71658704	+	hsa:64087	methylcrotonoyl-CoA carboxylase 2 (beta)	-0.634323	1.58035e-07	1218	1610	870	1005
MTUS1	protein-coding	chr8:17643794-17722575	-	hsa:57509	microtubule associated tumor suppressor 1	-1.21583	1.4568e-15	862	1254	494	435
CRIP2	protein-coding	chr14:105474775-105480170	+	hsa:1397	cysteine-rich protein 2	1.27057	5.43878e-18	354	541	1038	1167
CDH1	protein-coding	chr16:68737290-68835542	+	hsa:999	cadherin 1, type 1, E-cadherin (epithelial)	-1.01275	7.74335e-13	1104	1239	556	651
LOC100652758	ncRNA	chr5:151769793-151771508	-	hsa:100652758	uncharacterized LOC100652758	1.08646	0.0183192	24	50	79	79
CRIM1	protein-coding	chr2:36356088-36551047	+	hsa:51232	cysteine rich transmembrane BMP regulator 1 (chordin-like)	0.970588	1.57215e-16	1022	1133	2117	2269
CDS1	protein-coding	chr4:84582908-84651334	+	hsa:1040	CDP-diacylglycerol synthase (phosphatidate cytidylyltransferase) 1	-0.991008	0.000157007	198	379	146	146
HOXA10	protein-coding	chr7:27170591-27180261	-	hsa:3206	homeobox A10	-0.587992	0.00453286	318	572	291	307
LOC101928741	ncRNA	chr5:66205123-66209912	-	hsa:101928741	uncharacterized LOC101928741	2.82935	0.00441814	2	5	27	23
ANXA10	protein-coding	chr4:168092525-168187690	+	hsa:11199	annexin A10	-4.01097	8.2624e-06	27	70	1	5
PKD1	protein-coding	chr16:2088708-2135704	-	hsa:5310	polycystic kidney disease 1 (autosomal dominant)	0.941228	0.000426402	144	128	290	257
PKIB	protein-coding	chr6:122471917-122726373	+	hsa:5570	protein kinase (cAMP-dependent, catalytic) inhibitor beta	-1.45011	1.82579e-14	507	598	193	226
RNU2-63P	ncRNA	chr2:88016354-88016547	-		RNA, U2 small nuclear 63, pseudogene	1.28962	6.88214e-06	140	98	292	327
NFATC4	protein-coding	chr14:24366911-24379604	+	hsa:4776	nuclear factor of activated T-cells, cytoplasmic, calcineurin-dependent 4	0.908638	0.0272262	44	48	92	87
MYH15	protein-coding	chr3:108381244-108549462	-	hsa:22989	myosin, heavy chain 15	-1.54778	1.65089e-05	113	178	56	45
MYH14	protein-coding	chr19:50206068-50310540	+	hsa:79784	myosin, heavy chain 14, non-muscle	0.596549	3.9902e-07	1259	1394	2077	2087
PROSER3	protein-coding	chr19:35758153-35770115	+	hsa:148137	proline and serine rich 3	0.791223	8.06933e-06	280	385	621	557
NGLY1	protein-coding	chr3:25719270-25783443	-	hsa:55768	N-glycanase 1	-0.834689	0.000343978	245	325	149	180
PLAU	protein-coding	chr10:73909182-73917497	+	hsa:5328	plasminogen activator, urokinase	-0.864692	8.82807e-14	1601	1918	958	1041
PLEC	protein-coding	chr8:143915153-143942636	-	hsa:5339	plectin	0.737826	0.00869626	3261	3784	7007	5105
PLK2	protein-coding	chr5:58453982-58460139	-	hsa:10769	polo-like kinase 2	0.721679	2.35522e-09	729	935	1385	1440
PSTPIP2	protein-coding	chr18:45983536-46024688	-	hsa:9050	proline-serine-threonine phosphatase interacting protein 2	-0.733846	0.000631444	364	674	344	283
EEF1A1P30	pseudo	chrx:120210456-120220034	-		eukaryotic translation elongation factor 1 alpha 1 pseudogene 30	-3.86461	0.0161042	4	27	2	0
LOC102723481	ncRNA	chr15:66931537-66956515	-	hsa:102723481	uncharacterized LOC102723481	5.86041	0.0034107	0	0	14	8
EEF1A1P13	pseudo	chr5:14651643-14653227	-		eukaryotic translation elongation factor 1 alpha 1 pseudogene 13	-0.988165	0.000437356	163	234	95	110
CRLF1	protein-coding	chr19:18593237-18602289	-	hsa:9244	cytokine receptor-like factor 1	0.848038	5.08322e-08	622	638	1250	1110
LOC102723409	ncRNA	chr6:129502536-129558643	-	hsa:102723409	uncharacterized LOC102723409	0.853828	0.0081049	63	99	153	145
MAPKAPK5-AS1	ncRNA	chr12:111839769-111842902	-	hsa:51275	MAPKAPK5 antisense RNA 1	-0.73442	3.13807e-05	530	640	387	338
CGB8	protein-coding	chr19:49047638-49049111	-	hsa:94115	chorionic gonadotropin, beta polypeptide 8	2.63659	0.0491916	3	1	9	18
CGB7	protein-coding	chr19:49054274-49058346	-	hsa:94027	chorionic gonadotropin, beta polypeptide 7	1.06338	0.0160156	50	35	102	86
CGB2	protein-coding	chr19:49031912-49033238	+	hsa:114336	chorionic gonadotropin, beta polypeptide 2	0.888179	0.0410492	32	54	73	89
TYW5	protein-coding	chr2:199928911-199955736	-	hsa:129450	tRNA-yW synthesizing protein 5	-0.693239	0.0311346	115	169	77	103
IGFBP3	protein-coding	chr7:45912245-45921272	-	hsa:3486	insulin-like growth factor binding protein 3	-2.91184	0.0256017	9	21	1	3
IGFBP6	protein-coding	chr12:53097652-53102344	+	hsa:3489	insulin-like growth factor binding protein 6	1.5418	1.32086e-45	808	976	2570	2798
SEC24B	protein-coding	chr4:109433715-109540459	+	hsa:10427	SEC24 family member B	0.988168	0.0367013	27	40	64	72
FMNL2	protein-coding	chr2:152335170-152649826	+	hsa:114793	formin-like 2	-1.55553	0.0138416	29	65	14	18
FMNL3	protein-coding	chr12:49636499-49706515	-	hsa:91010	formin-like 3	1.60292	6.26758e-16	145	182	492	532
AQP7P1	pseudo	chr9:63315243-63334520	-	hsa:375719	aquaporin 7 pseudogene 1	-1.59419	0.044221	30	27	6	14
PTGS1	protein-coding	chr9:122371005-122395703	+	hsa:5742	prostaglandin-endoperoxide synthase 1 (prostaglandin G/H synthase and cyclooxygenase)	-1.12943	0.0123131	58	104	33	42
AP1M2	protein-coding	chr19:10572671-10587315	-	hsa:10053	adaptor-related protein complex 1, mu 2 subunit	-0.940197	4.97872e-16	1969	2415	1062	1302
CHD9	protein-coding	chr16:53141089-53325124	+	hsa:80205	chromodomain helicase DNA binding protein 9	-0.60829	0.0113002	205	291	165	168
CHD5	protein-coding	chr1:6101787-6180134	-	hsa:26038	chromodomain helicase DNA binding protein 5	1.27682	2.40417e-07	98	145	312	289
LOC105375127	lncRNA	chr7:2113537-2117740	+		uncharacterized LOC105375127	5.12935	0.0033477	0	1	14	22
CROCC	protein-coding	chr1:16921950-16972979	+	hsa:9696	ciliary rootlet coiled-coil, rootletin	0.687502	0.00452949	142	166	253	260
MGST1	protein-coding	chr12:16347652-16376179	+	hsa:4257	microsomal glutathione S-transferase 1	-0.812619	7.18037e-11	1717	2792	1242	1365
SOGA1	protein-coding	chr20:36777442-36863684	-	hsa:140710	suppressor of glucose, autophagy associated 1	0.792875	1.59648e-11	1166	1541	2550	2259
LOC100505942	ncRNA	chr16:67517706-67528745	-	hsa:100505942	uncharacterized LOC100505942	2.2159	0.0129535	4	7	25	27
CHRD	protein-coding	chr3:184380073-184389835	+	hsa:8646	chordin	1.48403	4.60651e-07	59	89	207	216
NCALD	protein-coding	chr8:101686545-102124857	-	hsa:83988	neurocalcin delta	-2.7341	0.011052	12	36	6	1
LBX2	protein-coding	chr2:74497517-74503316	-	hsa:85474	ladybird homeobox 2	1.19389	0.00120311	53	98	117	235
PIP4K2B	protein-coding	chr17:38765691-38799965	-	hsa:8396	phosphatidylinositol-5-phosphate 4-kinase, type II, beta	0.979999	0.00373008	54	83	130	146
POLB	protein-coding	chr8:42338625-42371810	+	hsa:5423	polymerase (DNA directed), beta	-1.18696	0.0432767	51	50	31	15
POLK	protein-coding	chr5:75511832-75602576	+	hsa:51426	polymerase (DNA directed) kappa	5.47529	0.010245	0	0	8	9
SHISA8	protein-coding	chr22:41907180-41915093	-	hsa:440829	shisa family member 8	1.08182	0.000384409	82	83	174	190
CISH	protein-coding	chr3:50606454-50611831	-	hsa:1154	cytokine inducible SH2-containing protein	0.606025	0.0383809	89	121	162	166
PLA2G4A	protein-coding	chr1:186828900-186988981	+	hsa:5321	phospholipase A2, group IVA (cytosolic, calcium-dependent)	-1.09634	0.000628972	129	218	91	73
LCP1	protein-coding	chr13:46125923-46168574	-	hsa:3936	lymphocyte cytosolic protein 1 (L-plastin)	-1.8779	0.0170305	27	34	11	6
AP3B1	protein-coding	chr5:78085379-78294727	-	hsa:8546	adaptor-related protein complex 3, beta 1 subunit	-0.701195	0.00557473	274	259	179	164
PPA1	protein-coding	chr10:70202830-70233434	-	hsa:5464	pyrophosphatase (inorganic) 1	-0.705332	1.87204e-13	3427	4877	2604	2603
PPA2	protein-coding	chr4:105369077-105474070	-	hsa:27068	pyrophosphatase (inorganic) 2	-0.625611	0.00185697	381	632	363	301
LYPD3	protein-coding	chr19:43460794-43465679	-	hsa:27076	LY6/PLAUR domain containing 3	0.920578	5.93849e-06	174	246	406	408
LYPD5	protein-coding	chr19:43795927-43802461	-	hsa:284348	LY6/PLAUR domain containing 5	0.588612	0.0491436	114	108	157	193
EHBP1L1	protein-coding	chr11:65576035-65592650	+	hsa:254102	EH domain binding protein 1-like 1	0.679617	2.19876e-10	1250	1656	2432	2346
AP3S1	protein-coding	chr5:115841606-115912189	+	hsa:1176	adaptor-related protein complex 3, sigma 1 subunit	-0.695931	4.88402e-08	2396	3663	2070	1727
CDC37L1-AS1	lncRNA	chr9:4676600-4679480	-	hsa:101929351	CDC37L1 antisense RNA 1 (head to head)	2.07958	0.0285547	9	2	26	25
PSMD14	protein-coding	chr2:161308275-161411717	+	hsa:10213	proteasome (prosome, macropain) 26S subunit, non-ATPase, 14	-0.599554	0.000427263	462	658	380	376
LDHB	protein-coding	chr12:21635342-21657794	-	hsa:3945	lactate dehydrogenase B	-0.679816	6.19799e-14	8110	12173	6312	6595
LOC154761	pseudo	chr7:143811968-143836717	-	hsa:154761	family with sequence similarity 115, member C pseudogene	-5.54183	0.00937924	6	11	0	0
GOLT1A	protein-coding	chr1:204198160-204214092	-	hsa:127845	golgi transport 1A	-2.86304	0.000154525	47	44	10	3
HSP90AB1	protein-coding	chr6:44246166-44253888	+	hsa:3326	heat shock protein 90kDa alpha (cytosolic), class B member 1	-0.658509	7.58172e-20	58437	74889	42998	43954
SEC11C	protein-coding	chr18:59139857-59158837	+	hsa:90701	SEC11 homolog C (S. cerevisiae)	-0.762082	0.00340466	177	285	134	143
ERCC2	protein-coding	chr19:45349837-45370647	-	hsa:2068	excision repair cross-complementation group 2	0.583573	3.91024e-08	1155	1571	2047	2145
SEMA3B-AS1	ncRNA	chr3:50266641-50267371	-	hsa:101928931	SEMA3B antisense RNA 1 (head to head)	7.0587	3.35618e-05	0	0	23	28
FER1L4	pseudo	chr20:35558737-35607562	-	hsa:80307	fer-1-like family member 4, pseudogene (functional)	-1.45791	0.00436253	52	96	34	20
GDPD1	protein-coding	chr17:59220467-59275970	+	hsa:284161	glycerophosphodiester phosphodiesterase domain containing 1	-0.634976	0.0185832	175	248	154	124
HMCN1	protein-coding	chr1:185734551-186190953	+	hsa:83872	hemicentin 1	1.40625	0.0012946	44	31	115	95
LOC101928004	ncRNA	chr6:6697603-6711690	-	hsa:101928004	uncharacterized LOC101928004	2.95232	0.0455625	3	0	9	17
WNT3A	protein-coding	chr1:228007022-228061271	+	hsa:89780	wingless-type MMTV integration site family, member 3A	1.7082	8.93823e-09	67	75	265	214
WNT11	protein-coding	chr11:76186396-76210842	-	hsa:7481	wingless-type MMTV integration site family, member 11	1.58531	0.0113259	7	37	48	81
LOC105369774	lncRNA	chr12:53727609-53731221	+		uncharacterized LOC105369774	6.2632	0.000929958	0	0	20	9
HMGCR	protein-coding	chr5:75338133-75362101	+	hsa:3156	3-hydroxy-3-methylglutaryl-CoA reductase	-0.695595	2.08184e-12	2391	3043	1697	1759
PRF1	protein-coding	chr10:70597348-70602775	-	hsa:5551	perforin 1 (pore forming protein)	2.1264	4.53341e-85	1264	1338	5645	6191
LOC105370792	lncRNA	chr15:41892777-41898815	+		uncharacterized LOC105370792	4.60776	0.000722405	1	1	14	37
ZNF219	protein-coding	chr14:21090046-21099014	-	hsa:51222	zinc finger protein 219	0.851808	2.17789e-05	193	308	474	445
ZNF213	protein-coding	chr16:3135056-3142804	+	hsa:7760	zinc finger protein 213	0.623818	0.000542921	291	340	474	533
MPRIP	protein-coding	chr17:17042455-17192647	+	hsa:23164	myosin phosphatase Rho interacting protein	0.62625	2.2642e-09	2336	2582	3735	4160
AP5Z1	protein-coding	chr7:4775617-4791762	+	hsa:9907	adaptor-related protein complex 5, zeta 1 subunit	0.773065	0.0182431	66	95	149	132
BEST1	protein-coding	chr11:61949774-61964465	+	hsa:7439	bestrophin 1	4.83871	0.047408	0	0	4	7
DISP2	protein-coding	chr15:40354359-40378755	+	hsa:85455	dispatched homolog 2 (Drosophila)	0.814125	0.00207977	114	130	223	221
ZNF227	protein-coding	chr19:44207527-44237268	+	hsa:7770	zinc finger protein 227	-0.966805	0.00116155	141	209	87	96
PACRGL	protein-coding	chr4:20700413-20732559	+	hsa:133015	PARK2 co-regulated-like	-0.704701	0.00728632	174	293	133	158
ZNF296	protein-coding	chr19:45071500-45076430	-	hsa:162979	zinc finger protein 296	0.82765	0.00124874	139	139	262	252
CLP1	protein-coding	chr11:57657744-57661865	+	hsa:10978	cleavage and polyadenylation factor I subunit 1	-0.654731	0.00135054	335	401	221	263
CLMP	protein-coding	chr11:123072006-123195305	-	hsa:79827	CXADR-like membrane protein	-2.3098	0.0236636	26	16	7	2
IGSF9B	protein-coding	chr11:133911961-133952641	-	hsa:22997	immunoglobulin superfamily, member 9B	0.616869	0.0082145	144	201	271	271
LOC107984914	lncRNA					0.870751	0.0124653	59	72	125	122
LOC105379051	lncRNA	chr5:82919381-82923401	-		uncharacterized LOC105379051	-0.87771	6.14955e-06	360	510	232	253
KLRC3	protein-coding	chr12:10412315-10420595	-	hsa:3823	killer cell lectin-like receptor subfamily C, member 3	-1.17694	0.0203974	49	73	29	26
RBM28	protein-coding	chr7:128310383-128343908	-	hsa:55131	RNA binding motif protein 28	-0.755206	5.33357e-05	392	616	293	315
RBM24	protein-coding	chr6:17281578-17293871	+	hsa:221662	RNA binding motif protein 24	0.872429	0.000160056	161	184	286	370
PSD3	protein-coding	chr8:18762883-19086909	-	hsa:23362	pleckstrin and Sec7 domain containing 3	-1.1863	1.03602e-16	949	1129	470	474
LOC105370680	lncRNA	chr14:102523962-102531291	+		uncharacterized LOC105370680	1.79875	0.000630779	16	29	54	106
S100A2	protein-coding	chr1:153561108-153565830	-	hsa:6273	S100 calcium binding protein A2	1.06762	0.00354018	50	67	103	150
S100A3	protein-coding	chr1:153547333-153549258	-	hsa:6274	S100 calcium binding protein A3	0.870243	0.00634867	69	89	150	147
S100A4	protein-coding	chr1:153543622-153545806	-	hsa:6275	S100 calcium binding protein A4	0.734632	1.35055e-11	1346	1638	2353	2784
LOC105369663	lncRNA	chr12:12721812-12724041	-		uncharacterized LOC105369663	2.01105	0.0148516	7	7	23	36
LOC105369664	lncRNA	chr12:12879726-12883121	-		uncharacterized LOC105369664	1.97277	0.00396491	10	11	49	36
LOC107984881	lncRNA					4.05697	0.046543	0	1	7	10
LGI3	protein-coding	chr8:22146830-22156831	-	hsa:203190	leucine-rich repeat LGI family, member 3	1.5754	5.76259e-05	52	36	136	142
LOC107984816	ncRNA					-2.279	0.0317845	14	24	2	6
LOC101928216	ncRNA	chr1:26006534-26031177	-	hsa:101928216	uncharacterized LOC101928216	5.6276	0.00681733	0	0	7	12
USP53	protein-coding	chr4:119212588-119295518	+	hsa:54532	ubiquitin specific peptidase 53	-0.697132	0.00242605	320	333	181	240
SLC25A13	protein-coding	chr7:96120220-96322127	-	hsa:10165	solute carrier family 25 (aspartate/glutamate carrier), member 13	-0.636232	0.0425516	115	166	89	96
SLC25A20	protein-coding	chr3:48856923-48898993	-	hsa:788	solute carrier family 25 (carnitine/acylcarnitine translocase), member 20	0.599878	0.00271569	204	285	364	396
SLC25A29	protein-coding	chr14:100291116-100306444	-	hsa:123096	solute carrier family 25 (mitochondrial carnitine/acylcarnitine carrier), member 29	0.63224	4.19423e-06	534	677	958	975
SLC25A27	protein-coding	chr6:46652915-46678190	+	hsa:9481	solute carrier family 25, member 27	-1.7113	0.00688611	29	73	13	18
LOC105370567	lncRNA	chr14:74651276-74657679	-		uncharacterized LOC105370567	-1.27959	0.0284328	33	69	23	19
SLC25A44	protein-coding	chr1:156193711-156212796	+	hsa:9673	solute carrier family 25, member 44	0.586742	4.94687e-07	910	1322	1640	1789
LOC339988	miscRNA	chr4:6687792-6690748	-	hsa:339988	uncharacterized LOC339988	3.44753	0.0132258	0	3	15	17
PPARG	protein-coding	chr3:12349474-12434362	+	hsa:5468	peroxisome proliferator-activated receptor gamma	-0.65133	8.86973e-05	600	674	424	417
ZNF414	protein-coding	chr19:8511332-8514164	-	hsa:84330	zinc finger protein 414	1.155	1.66776e-06	186	177	479	363
TSTD1	protein-coding	chr1:161037631-161038984	-	hsa:100131187	thiosulfate sulfurtransferase (rhodanese)-like domain containing 1	-0.600637	3.01881e-05	702	983	563	575
PTMS	protein-coding	chr12:6766139-6770952	+	hsa:5763	parathymosin	0.632663	2.29365e-13	3951	5606	7226	7947
ZNF446	protein-coding	chr19:58475855-58489373	+	hsa:55663	zinc finger protein 446	0.612839	0.0192737	111	163	198	231
LOC105370503	lncRNA	chr14:53702320-53850862	-		uncharacterized LOC105370503	-0.894478	0.00150134	219	205	120	119
ZNF426	protein-coding	chr19:9523224-9538645	-	hsa:79088	zinc finger protein 426	-2.28094	0.00259185	30	41	7	8
SKIDA1	protein-coding	chr10:21513475-21525682	-	hsa:387640	SKI/DACH domain containing 1	2.84891	2.23919e-09	9	24	114	125
PTRF	protein-coding	chr17:42411367-42423320	-	hsa:284119	polymerase I and transcript release factor	0.817713	1.0321e-19	3945	4700	7344	8440
ZNF488	protein-coding	chr10:47365482-47384339	-	hsa:118738	zinc finger protein 488	0.604979	0.00429036	209	241	321	389
ZNF469	protein-coding	chr16:88424805-88440753	+	hsa:84627	zinc finger protein 469	1.32983	3.7567e-06	71	117	264	215
UPK3BP1	ncRNA					2.92094	0.00955622	3	2	16	24
IMMP2L	protein-coding	chr7:110663047-111562253	-	hsa:83943	IMP2 inner mitochondrial membrane peptidase-like (S. cerevisiae)	-1.23504	0.0057246	61	151	52	37
ASCC3	protein-coding	chr6:100508194-100881372	-	hsa:10973	activating signal cointegrator 1 complex subunit 3	-0.831703	0.00403465	178	186	105	108
FRAS1	protein-coding	chr4:78057570-78446633	+	hsa:80144	Fraser extracellular matrix complex subunit 1	0.94378	0.000190944	103	167	248	281
CEND1	protein-coding	chr11:787110-790126	-	hsa:51286	cell cycle exit and neuronal differentiation 1	2.18781	0.00632621	5	9	28	37
UBL3	protein-coding	chr13:29764408-29850683	-	hsa:5412	ubiquitin-like 3	-0.769316	0.00667787	151	213	101	118
MYO7A	protein-coding	chr11:77138295-77212588	+	hsa:4647	myosin VIIA	-1.036	0.0242535	73	89	52	29
HMGN3	protein-coding	chr6:79201245-79234738	-	hsa:9324	high mobility group nucleosomal binding domain 3	-0.796017	0.00410442	179	314	163	123
RBMS2	protein-coding	chr12:56542317-56595600	+	hsa:5939	RNA binding motif, single stranded interacting protein 2	0.693405	2.62324e-05	437	486	685	868
CRTC1	protein-coding	chr19:18683615-18782333	+	hsa:23373	CREB regulated transcription coactivator 1	0.848974	5.37935e-06	227	311	509	484
LOC105370449	lncRNA	chr14:34551437-34555294	-		uncharacterized LOC105370449	0.927235	0.0293235	51	50	71	131
DNAH6	protein-coding	chr2:84516455-84681444	+	hsa:1768	dynein, axonemal, heavy chain 6	-1.54222	0.0329363	33	31	12	11
DNAH3	protein-coding	chr16:20933111-21151075	-	hsa:55567	dynein, axonemal, heavy chain 3	1.64543	0.0109463	13	14	36	52
DNAJB13	protein-coding	chr11:73957259-73970287	+	hsa:374407	DnaJ (Hsp40) homolog, subfamily B, member 13	3.25689	0.0499461	2	0	11	10
LOC105370463	lncRNA	chr14:40267384-40318425	-		uncharacterized LOC105370463	-2.38525	0.0125574	23	22	5	4
ASAP3	protein-coding	chr1:23428563-23484191	-	hsa:55616	ArfGAP with SH3 domain, ankyrin repeat and PH domain 3	1.47263	0.0300511	17	29	106	21
COCH	protein-coding	chr14:30874496-30890618	+	hsa:1690	cochlin	0.814695	0.00165827	136	139	263	240
ZNF330	protein-coding	chr4:141220887-141234697	+	hsa:27309	zinc finger protein 330	-0.605741	0.00296186	359	455	233	320
PUS3	protein-coding	chr11:125893655-125903219	-	hsa:83480	pseudouridylate synthase 3	-0.871436	0.0162543	88	144	59	70
HMHA1	protein-coding	chr19:1076634-1087831	+	hsa:23526	histocompatibility (minor) HA-1	1.13261	2.17643e-12	365	390	856	864
CENPM	protein-coding	chr22:41938721-41940219	-	hsa:79019	centromere protein M	0.661465	7.37113e-08	708	909	1288	1345
GGNBP2	protein-coding	chr17:36544950-36589848	+	hsa:79893	gametogenetin binding protein 2	2.10637	0.0051356	7	9	33	38
ZNF365	protein-coding	chr10:62374157-62402458	+	hsa:22891	zinc finger protein 365	0.856832	0.0119082	65	75	136	126
ZNF358	protein-coding	chr19:7513880-7521025	+	hsa:140467	zinc finger protein 358	0.590942	0.00154544	253	380	501	471
VASH1	protein-coding	chr14:76761892-76783020	+	hsa:22846	vasohibin 1	0.736792	7.6991e-06	354	424	686	652
BAHD1	protein-coding	chr15:40439721-40468242	+	hsa:22893	bromo adjacent homology domain containing 1	0.602211	4.50865e-06	912	1043	1610	1460
MYO1G	protein-coding	chr7:44962662-44979092	-	hsa:64005	myosin IG	4.87481	0.0481811	0	0	9	2
MYO1C	protein-coding	chr17:1464186-1485757	-	hsa:4641	myosin IC	0.58136	3.97665e-11	7156	8304	11262	12738
ZNF397	protein-coding	chr18:35241030-35247189	+	hsa:84307	zinc finger protein 397	-0.616658	0.0103975	256	281	194	169
LIPG	protein-coding	chr18:49560699-49592908	+	hsa:9388	lipase, endothelial	-0.900677	0.00204615	146	245	112	100
LIPH	protein-coding	chr3:185506262-185552588	-	hsa:200879	lipase, member H	-0.938239	2.2262e-07	461	663	313	286
PTPRM	protein-coding	chr18:7748381-8314797	+	hsa:5797	protein tyrosine phosphatase, receptor type, M	-1.13364	0.00738607	72	108	35	49
LOC101928445	ncRNA	chr5:179595904-179603741	-	hsa:101928445	uncharacterized LOC101928445	-2.31954	0.0482238	9	26	1	6
ISY1-RAB43	protein-coding	chr3:129087569-129161230	-	hsa:100534599	ISY1-RAB43 readthrough	0.633266	0.00496538	154	235	312	303
LOC101928450	ncRNA	chr19:781002-782290	-	hsa:101928450	uncharacterized LOC101928450	3.88125	8.91206e-05	5	0	49	31
UCN2	protein-coding	chr3:48561718-48563768	-	hsa:90226	urocortin 2	4.55082	0.0157783	0	1	10	14
UCP2	protein-coding	chr11:73974671-73982844	-	hsa:7351	uncoupling protein 2 (mitochondrial, proton carrier)	1.77733	9.00255e-40	365	469	1488	1452
PPDPF	protein-coding	chr20:63520780-63522171	+	hsa:79144	pancreatic progenitor cell differentiation and proliferation factor	0.712258	6.3723e-10	1767	2056	2861	3645
LOC102723786	ncRNA	chr16:71288866-71302869	+	hsa:102723786	uncharacterized LOC102723786	-0.731707	5.68207e-07	1029	1620	708	919
E2F5	protein-coding	chr8:85177384-85214518	+	hsa:1875	E2F transcription factor 5, p130-binding	-0.738814	0.00761213	184	287	167	119
TIMM17B	protein-coding	chrx:48893447-48898143	-	hsa:10245	translocase of inner mitochondrial membrane 17 homolog B (yeast)	0.838114	3.20808e-15	1342	1610	2541	2921
TRHDE-AS1	ncRNA	chr12:72262547-72273509	-	hsa:283392	TRHDE antisense RNA 1	1.32257	0.0282085	17	18	43	48
ANXA1	protein-coding	chr9:73151731-73170393	+	hsa:301	annexin A1	-1.07557	4.90618e-27	3155	4440	1864	1822
ANXA6	protein-coding	chr5:151100710-151157882	-	hsa:309	annexin A6	0.862095	3.6085e-17	2656	3043	4897	5865
B3GNT4	protein-coding	chr12:122203681-122207537	+	hsa:79369	UDP-GlcNAc:betaGal beta-1,3-N-acetylglucosaminyltransferase 4	0.580598	0.0246948	116	199	246	231
B3GNT5	protein-coding	chr3:183265311-183273391	+	hsa:84002	UDP-GlcNAc:betaGal beta-1,3-N-acetylglucosaminyltransferase 5	-1.9641	0.0013071	38	78	10	20
TCF7L1	protein-coding	chr2:85133460-85310388	+	hsa:83439	transcription factor 7-like 1 (T-cell specific, HMG-box)	0.908437	0.0225585	47	56	112	87
CPS1	protein-coding	chr2:210545064-210679107	+	hsa:1373	carbamoyl-phosphate synthase 1, mitochondrial	-0.662286	0.000147067	488	599	366	342
CPTP	protein-coding	chr1:1324763-1328896	+	hsa:80772	ceramide-1-phosphate transfer protein	0.940453	4.9399e-09	305	422	713	717
RBPMS	protein-coding	chr8:30384506-30545157	+	hsa:11030	RNA binding protein with multiple splicing	1.12644	4.89437e-10	242	274	573	594
MIR3658	ncRNA	chr1:165907921-165907976	+	hsa:100500832	microRNA 3658	-1.1662	0.00264778	80	186	59	59
SLC16A4	protein-coding	chr1:110362856-110391968	-	hsa:9122	solute carrier family 16, member 4	3.69142	0.0494978	6	0	42	48
SLC16A6	protein-coding	chr17:68267026-68285560	-	hsa:9120	solute carrier family 16, member 6	1.95768	8.75794e-05	19	24	103	68
MIR3614	ncRNA	chr17:56891319-56891341	-	hsa:100500827	microRNA 3614	-1.16822	0.0270346	41	80	30	24
LOC101928377	ncRNA	chr14:75423667-75427690	-	hsa:101928377	uncharacterized LOC101928377	1.93232	0.0373762	9	3	20	30
NR2F1	protein-coding	chr5:93587101-93594613	+	hsa:7025	nuclear receptor subfamily 2, group F, member 1	0.768819	6.17789e-07	464	563	957	846
RNU1-2	snRNA	chr1:16895980-16896143	+	hsa:26870	RNA, U1 small nuclear 2	1.60431	0.046645	4	17	24	39
NR1H2	protein-coding	chr19:50376423-50383028	+	hsa:7376	nuclear receptor subfamily 1, group H, member 2	0.607645	4.88123e-06	639	784	1039	1202
ZNF280C	protein-coding	chrx:130202786-130268899	-	hsa:55609	zinc finger protein 280C	-0.72909	0.000487914	303	388	215	214
PCBP2P1	pseudo	chr21:39170282-39172368	-		poly(rC) binding protein 2 pseudogene 1	4.30458	0.0256592	1	0	9	12
SCARNA7	ncRNA	chr3:160514907-160515236	-	hsa:677767	small Cajal body-specific RNA 7	-1.20962	0.00119986	91	189	66	55
GPR137	protein-coding	chr11:64270337-64289494	+	hsa:56834	G protein-coupled receptor 137	1.01681	8.97935e-07	222	218	446	484
GPR153	protein-coding	chr1:6247346-6260975	-	hsa:387509	G protein-coupled receptor 153	0.890288	0.000653613	106	143	249	224
MAFG-AS1	ncRNA	chr17:81927829-81930753	+	hsa:92659	MAFG antisense RNA 1 (head to head)	0.729317	0.00786832	93	156	209	210
NCKAP5L	protein-coding	chr12:49791139-49828750	-	hsa:57701	NCK-associated protein 5-like	0.663726	0.000522171	356	338	582	568
ZBTB8B	protein-coding	chr1:32465057-32487859	+	hsa:728116	zinc finger and BTB domain containing 8B	-1.35918	0.00527751	70	80	21	40
HOXA-AS2	ncRNA	chr7:27121919-27128760	+	hsa:285943	HOXA cluster antisense RNA 2	2.09174	0.0299352	7	3	19	27
PXDN	protein-coding	chr2:1631887-1744547	-	hsa:7837	peroxidasin homolog (Drosophila)	-2.41987	1.41669e-18	279	325	54	63
CRAT	protein-coding	chr9:129094794-129110783	-	hsa:1384	carnitine O-acetyltransferase	0.832332	8.7064e-12	850	1266	1763	2090
ZBTB46	protein-coding	chr20:63743670-63831160	-	hsa:140685	zinc finger and BTB domain containing 46	0.626216	1.92142e-05	513	726	872	1091
KRTCAP3	protein-coding	chr2:27442366-27446481	+	hsa:200634	keratinocyte associated protein 3	-0.620843	0.00016335	556	877	483	464
ZBTB42	protein-coding	chr14:104800597-104804712	+	hsa:100128927	zinc finger and BTB domain containing 42	0.734484	0.00187073	155	200	332	274
ZBTB20	protein-coding	chr3:114314500-115071414	-	hsa:26137	zinc finger and BTB domain containing 20	-0.807244	0.0335022	76	137	60	63
ZBTB18	protein-coding	chr1:244051259-244057476	+	hsa:10472	zinc finger and BTB domain containing 18	0.867358	0.0375411	38	53	87	83
PPP4R3B	protein-coding	chr2:55547292-55617725	-	hsa:57223	SMEK homolog 2, suppressor of mek1 (Dictyostelium)	-0.699487	2.05863e-06	677	897	489	507
NLRP14	protein-coding	chr11:7020446-7089025	+	hsa:338323	NLR family, pyrin domain containing 14	-2.14911	0.0346452	12	28	4	5
CTNNB1	protein-coding	chr3:41199451-41240448	+	hsa:1499	catenin (cadherin-associated protein), beta 1, 88kDa	-0.62823	1.55379e-13	5624	7178	4257	4269
LOC105370913	lncRNA	chr15:78692826-78718624	-		uncharacterized LOC105370913	4.97512	0.0351319	0	0	6	6
P2RY6	protein-coding	chr11:73290422-73297805	+	hsa:5031	pyrimidinergic receptor P2Y, G-protein coupled, 6	7.54216	5.24868e-06	0	0	20	52
MLLT3	protein-coding	chr9:20342383-20622458	-	hsa:4300	myeloid/lymphoid or mixed-lineage leukemia (trithorax homolog, Drosophila); translocated to, 3	-1.54563	0.00469162	51	62	19	21
LOC101928631	lncRNA	chr19:2908628-2926785	-	hsa:101928631	uncharacterized LOC101928631	-5.11027	0.0295389	3	10	0	0
LOC101928659	ncRNA	chr16:87317509-87318043	+	hsa:101928659	uncharacterized LOC101928659	1.06247	0.0500452	22	28	44	64
LOC107001062	lncRNA					1.34695	0.0289601	16	18	36	54
CDK5RAP3	protein-coding	chr17:47970528-47981786	+	hsa:80279	CDK5 regulatory subunit associated protein 3	-0.763526	2.52662e-07	763	924	475	553
NR4A1	protein-coding	chr12:52038288-52046643	+	hsa:3164	nuclear receptor subfamily 4, group A, member 1	0.766658	0.000777912	162	191	322	298
CSF1	protein-coding	chr1:109910611-109926743	+	hsa:1435	colony stimulating factor 1 (macrophage)	0.606994	0.0379267	88	138	185	165
PLSCR1	protein-coding	chr3:146515178-146544805	-	hsa:5359	phospholipid scramblase 1	-0.628482	0.000451819	425	528	308	328
PYM1	protein-coding					-0.587017	0.00879445	249	418	206	245
SLC18B1	protein-coding	chr6:132769585-132798627	-	hsa:116843	solute carrier family 18, subfamily B, member 1	-0.889931	2.14548e-05	306	441	208	204
LOC105379276	lncRNA	nt_113901.1:137954-141789	+		uncharacterized LOC105379276	-1.05059	0.0357596	59	62	26	35
LOC102723834	ncRNA	chr1:225701114-225716947	+	hsa:102723834	uncharacterized LOC102723834	3.57605	0.0225561	2	0	14	12
LOC105379243	lncRNA	chr8:11787218-11801355	-		uncharacterized LOC105379243	-1.3268	0.0423226	22	73	20	17
CST6	protein-coding	chr11:66011991-66013505	+	hsa:1474	cystatin E/M	0.942855	1.18525e-10	571	641	1072	1351
LOC105370866	lncRNA	chr15:65833386-65859657	+		uncharacterized LOC105370866	1.97821	0.0239324	11	3	36	24
LOC105370868	lncRNA	chr15:66278502-66293362	-		uncharacterized LOC105370868	2.9621	0.0196483	2	2	22	10
LMO4	protein-coding	chr1:87328868-87347459	+	hsa:8543	LIM domain only 4	-1.05585	2.65055e-05	217	373	148	139
CSTA	protein-coding	chr3:122325164-122341969	+	hsa:1475	cystatin A (stefin A)	-1.29306	0.0245895	55	48	27	17
LOC105369822	lncRNA	chr12:69446776-69462758	+		uncharacterized LOC105369822	4.8532	0.045533	0	0	6	5
C15orf59	protein-coding	chr15:73735431-73752370	-	hsa:388135	chromosome 15 open reading frame 59	1.3289	0.00402198	27	36	91	71
C15orf61	protein-coding	chr15:67521184-67527303	+	hsa:145853	chromosome 15 open reading frame 61	-0.886133	0.00985895	108	149	61	82
MIR584	ncRNA	chr5:149062334-149062355	-	hsa:693169	microRNA 584	5.2997	0.0163581	0	0	8	7
ATP2C2	protein-coding	chr16:84432769-84465777	+	hsa:9914	ATPase, Ca++ transporting, type 2C, member 2	-0.913899	5.5826e-05	261	414	187	177
HAS3	protein-coding	chr16:69106226-69118719	+	hsa:3038	hyaluronan synthase 3	-1.24044	3.88278e-26	2049	2329	943	979
CTGF	protein-coding	chr6:131948176-131951378	-	hsa:1490	connective tissue growth factor	1.55804	5.55106e-21	218	297	771	785
LRRC37A3	protein-coding	chr17:64854147-64919463	-	hsa:374819	leucine rich repeat containing 37, member A3	-2.24354	0.00836455	25	30	6	6
CTSD	protein-coding	chr11:1752752-1763992	-	hsa:1509	cathepsin D	0.592963	5.10589e-12	2871	3746	4966	5303
HBE1	protein-coding	chr11:5268350-5270143	-	hsa:3046	hemoglobin, epsilon 1	-0.635872	2.28494e-10	2167	2892	1603	1743
NPTXR	protein-coding	chr22:38818451-38844012	-	hsa:23467	neuronal pentraxin receptor	1.00995	7.7711e-11	378	526	985	877
SCNN1A	protein-coding	chr12:6346843-6377357	-	hsa:6337	sodium channel, non-voltage-gated 1 alpha subunit	-0.682759	8.70054e-09	1313	1728	983	963
LNX1	protein-coding	chr4:53460270-53591586	-	hsa:84708	ligand of numb-protein X 1, E3 ubiquitin protein ligase	-2.04325	0.00436338	29	58	15	6
CASC21	lncRNA	chr8:127244637-127392631	+		cancer susceptibility candidate 21 (non-protein coding)	-5.18383	0.027087	2	12	0	0
CASC10	protein-coding	chr10:21494492-21497284	-	hsa:399726	cancer susceptibility candidate 10	2.38269	1.09527e-07	13	35	131	119
NUAK2	protein-coding	chr1:205302063-205321791	-	hsa:81788	NUAK family, SNF1-like kinase, 2	0.59883	0.00545972	208	225	338	343
MPZL2	protein-coding	chr11:118253416-118264536	-	hsa:10205	myelin protein zero-like 2	-0.84668	0.00168483	192	228	108	134
MPZL3	protein-coding	chr11:118226690-118252368	-	hsa:196264	myelin protein zero-like 3	-0.872605	0.000209248	233	382	168	173
LOC643770	ncRNA	chr12:98485544-98503855	-	hsa:643770	uncharacterized LOC643770	-5.6566	0.0066271	8	10	0	0
MIR423	ncRNA	chr17:30117095-30117117	+	hsa:494335	microRNA 423	-5.20258	0.0266414	10	2	0	0
NDUFAF2	protein-coding	chr5:60945129-61153037	+	hsa:91942	NADH dehydrogenase (ubiquinone) complex I, assembly factor 2	-1.03792	0.0276962	55	82	36	32
NDUFAF4	protein-coding	chr6:96889311-96897891	-	hsa:29078	NADH dehydrogenase (ubiquinone) complex I, assembly factor 4	-0.70272	0.000317791	347	532	278	272
RPL22P2	pseudo	chr14:76886320-76886775	-		ribosomal protein L22 pseudogene 2	-1.27338	0.0327189	41	48	21	17
LOC107984022	ncRNA					5.62336	0.00711219	0	0	6	13
CUTC	protein-coding	chr10:99732201-99756137	+	hsa:51076	cutC copper transporter	-0.748844	6.11622e-07	667	908	484	477
LOC107984000	lncRNA					-2.94206	0.044321	8	15	2	1
NLGN2	protein-coding	chr17:7405492-7419860	+	hsa:57555	neuroligin 2	0.941189	4.55875e-12	766	941	1826	1547
HCN4	protein-coding	chr15:73319859-73369264	-	hsa:10021	hyperpolarization activated cyclic nucleotide-gated potassium channel 4	0.997806	0.0276987	24	76	94	103
ATP2A3	protein-coding	chr17:3923869-3964464	-	hsa:489	ATPase, Ca++ transporting, ubiquitous	0.786524	1.06216e-08	500	696	1062	1051
HSPA12B	protein-coding	chr20:3732727-3751399	+	hsa:116835	heat shock 70kD protein 12B	4.83871	0.047408	0	0	4	7
TOR4A	protein-coding	chr9:137277828-137282641	+	hsa:54863	torsin family 4, member A	0.897474	9.71724e-14	805	1022	1801	1700
ZADH2	protein-coding	chr18:75195108-75209348	-	hsa:284273	zinc binding alcohol dehydrogenase domain containing 2	-0.707784	9.30568e-06	578	723	408	413
LOC107984158	lncRNA					-0.942945	0.0194007	82	101	53	45
MARCH5	protein-coding	chr10:92291171-92352085	+	hsa:54708	membrane-associated ring finger (C3HC4) 5	-0.681869	0.00813742	198	313	180	143
SOX18	protein-coding	chr20:64047726-64049626	-	hsa:54345	SRY (sex determining region Y)-box 18	1.33295	0.00250121	27	46	106	80
SCAF11	protein-coding	chr12:45919131-45991998	-	hsa:9169	SR-related CTD-associated factor 11	-0.874905	1.28909e-09	987	1088	567	609
STXBP6	protein-coding	chr14:24809654-25032569	-	hsa:29091	syntaxin binding protein 6 (amisyn)	-7.436	7.08784e-06	23	40	0	0
STXBP4	protein-coding	chr17:54968728-55164285	+	hsa:252983	syntaxin binding protein 4	-0.608587	0.0439101	133	164	98	103
PCDH7	protein-coding	chr4:30720381-31146800	+	hsa:5099	protocadherin 7	-0.68773	1.33991e-06	1045	1151	723	692
LPXN	protein-coding	chr11:58526871-58577968	-	hsa:9404	leupaxin	0.819685	0.0220333	65	65	121	118
SLC16A13	protein-coding	chr17:7036075-7040121	+	hsa:201232	solute carrier family 16, member 13	0.75424	0.0148685	88	95	168	152
LOC105374838	lncRNA	chr2:84926019-84966801	+		uncharacterized LOC105374838	1.27082	0.000813078	35	92	163	141
LOC107984292	lncRNA					-3.43737	0.0453329	2	21	1	1
DACT1	protein-coding	chr14:58638039-58648321	+	hsa:51339	dishevelled-binding antagonist of beta-catenin 1	-0.814586	0.0115831	164	178	122	79
HEG1	protein-coding	chr3:124965710-125055958	-	hsa:57493	heart development protein with EGF-like domains 1	1.59945	5.69901e-20	189	252	656	718
ATP11C	protein-coding	chrx:139726346-139932985	-	hsa:286410	ATPase, class VI, type 11C	-0.626837	0.00290191	318	386	208	264
NCOR2	protein-coding	chr12:124324411-124567464	-	hsa:9612	nuclear receptor corepressor 2	0.874309	8.09503e-07	488	534	1102	836
RBPMS2	protein-coding	chr15:64739894-64775571	-	hsa:348093	RNA binding protein with multiple splicing 2	0.897705	1.77336e-05	183	330	498	467
PPIL4	protein-coding	chr6:149504495-149546102	-	hsa:85313	peptidylprolyl isomerase (cyclophilin)-like 4	-0.780972	0.0312519	86	135	63	68
TMEM229B	protein-coding	chr14:67470266-67515304	-	hsa:161145	transmembrane protein 229B	0.8419	0.0287858	43	67	99	102
HEPH	protein-coding	chrx:66164230-66267389	+	hsa:9843	hephaestin	-4.838	0.000260063	21	35	0	2
HES2	protein-coding	chr1:6415232-6419919	-	hsa:54626	hes family bHLH transcription factor 2	1.02058	6.11111e-08	220	261	504	504
SLCO1B3	protein-coding	chr12:20810704-20916911	+	hsa:28234	solute carrier organic anion transporter family, member 1B3	0.682223	0.0282236	95	93	153	162
PRUNE2	protein-coding	chr9:76611376-76906220	-	hsa:158471	prune homolog 2 (Drosophila)	-4.97067	0.0417208	2	10	0	0
RTN4R	protein-coding	chr22:20241415-20268293	-	hsa:65078	reticulon 4 receptor	0.682561	0.000351932	230	376	493	495
FRMD5	protein-coding	chr15:43870764-44195256	-	hsa:84978	FERM domain containing 5	-0.592894	7.28172e-05	708	1072	615	587
FRMD3	protein-coding	chr9:83244621-83560208	-	hsa:257019	FERM domain containing 3	3.60471	0.027797	0	2	9	15
LOC105369371	lncRNA	chr11:70063152-70071175	+		uncharacterized LOC105369371	2.61158	0.0127153	6	1	21	26
LOC105369332	lncRNA	chr11:62832234-62834043	+		uncharacterized LOC105369332	1.94007	0.00705328	11	8	35	42
LOC107984390	lncRNA					4.84598	0.0461478	0	0	5	6
ULK1	protein-coding	chr12:131894955-131923150	+	hsa:8408	unc-51 like autophagy activating kinase 1	0.630837	0.000112026	370	520	741	668
LOC105370356	lncRNA	chr13:109146900-109159788	-		uncharacterized LOC105370356	4.94822	0.041796	0	0	2	10
IPO5P1	miscRNA	chr19:23255053-23274251	-	hsa:100132815	importin 5 pseudogene 1	0.714158	0.00872389	105	129	195	201
LOC105369317	lncRNA	chr11:59560068-59565805	-		uncharacterized LOC105369317	5.09365	0.0269903	0	0	7	6
LOC107984338	lncRNA					0.79852	0.0443979	50	65	78	129
BATF2	protein-coding	chr11:64987945-64990277	-	hsa:116071	basic leucine zipper transcription factor, ATF-like 2	0.924032	0.0334036	54	38	96	89
FABP5P7	pseudo	chr11:59781103-59781751	-		fatty acid binding protein 5 pseudogene 7	-1.31142	0.0168829	43	64	22	22
KIAA1462	protein-coding	chr10:30012800-30059586	-	hsa:57608	KIAA1462	1.04581	6.83249e-16	633	731	1459	1455
DAGLA	protein-coding	chr11:61680184-61747002	+	hsa:747	diacylglycerol lipase, alpha	0.601742	0.0345747	124	165	268	180
CALM3	protein-coding	chr19:46601255-46610782	+	hsa:808	calmodulin 3 (phosphorylase kinase, delta)	0.606613	2.32001e-13	6028	7467	9940	11291
LYSMD2	protein-coding	chr15:51723064-51738123	-	hsa:256586	LysM, putative peptidoglycan-binding, domain containing 2	-0.644237	0.0354247	119	213	99	116
LSM5	protein-coding	chr7:32485333-32495258	-	hsa:23658	LSM5 homolog, U6 small nuclear RNA associated (S. cerevisiae)	-0.699437	0.00351959	308	577	319	227
CYS1	protein-coding	chr2:10056799-10080411	-	hsa:192668	cystin 1	0.788293	0.0217683	54	97	129	135
LOC105370205	lncRNA	chr13:49635465-49640334	-		uncharacterized LOC105370205	-5.44693	0.0123397	9	6	0	0
AKR1E2	protein-coding	chr10:4824556-4848062	+	hsa:83592	aldo-keto reductase family 1, member E2	0.706165	0.00783451	142	134	233	238
LOC105369202	lncRNA	chr19:15855340-15863863	-		uncharacterized LOC105369202	-0.863578	0.0315234	76	101	48	52
LOC107984439	lncRNA					4.98173	0.0348997	0	0	7	5
AKR1A1	protein-coding	chr1:45550783-45570051	+	hsa:10327	aldo-keto reductase family 1, member A1 (aldehyde reductase)	-0.65715	1.45331e-10	2206	3129	1660	1804
LOC107984449	protein-coding					-0.618281	0.048485	152	180	84	141
KIAA1522	protein-coding	chr1:32741839-32770860	+	hsa:57648	KIAA1522	0.648638	1.74319e-07	1554	1871	3014	2518
AMMECR1	protein-coding	chrx:110194186-110318152	-	hsa:9949	Alport syndrome, mental retardation, midface hypoplasia and elliptocytosis chromosomal region gene 1	-0.737945	0.00362561	255	263	175	148
FIRRE	ncRNA	chrx:131702650-131830643	-	hsa:286467	firre intergenic repeating RNA element	-0.858853	1.17753e-05	351	523	240	252
HCFC1R1	protein-coding	chr16:3022620-3024286	-	hsa:54985	host cell factor C1 regulator 1 (XPO1 dependent)	0.60404	0.0002964	317	468	582	638
L3MBTL3	protein-coding	chr6:130018583-130141449	+	hsa:84456	l(3)mbt-like 3 (Drosophila)	-0.815614	0.000626342	235	324	173	152
LOC105370117	lncRNA	chr13:24512827-24529087	+		uncharacterized LOC105370117	5.38519	0.0131147	0	0	7	9
TMEM255B	protein-coding	chr13:113759217-113813797	+	hsa:348013	transmembrane protein 255B	1.00265	0.0436082	41	26	73	70
LOC101930085	lncRNA	chr7:35695206-35699413	+	hsa:101930085	uncharacterized LOC101930085	0.719389	0.00583433	126	140	208	247
TTC7A	protein-coding	chr2:46941174-47076136	+	hsa:57217	tetratricopeptide repeat domain 7A	0.697488	2.96093e-07	1010	1019	1616	1824
LOC107984510	lncRNA					0.993861	8.80328e-06	141	257	381	421
LOC107984502	lncRNA					3.82032	0.0153297	0	2	10	18
ATP5A1	protein-coding	chr18:46084144-46098353	-	hsa:498	ATP synthase, H+ transporting, mitochondrial F1 complex, alpha subunit 1, cardiac muscle	-0.64138	1.62789e-14	9569	13045	7521	7334
MICALL1	protein-coding	chr22:37906176-37942032	+	hsa:85377	MICAL-like 1	0.858623	1.37852e-11	627	820	1364	1332
MICALL2	protein-coding	chr7:1433769-1455648	-	hsa:79778	MICAL-like 2	0.586569	0.00336157	238	270	396	394
RHBDF1	protein-coding	chr16:58059-72629	-	hsa:64285	rhomboid 5 homolog 1 (Drosophila)	0.60179	0.0219464	167	181	319	227
TNFRSF21	protein-coding	chr6:47267823-47309976	-	hsa:27242	tumor necrosis factor receptor superfamily, member 21	-0.99153	1.84569e-23	2658	3627	1612	1629
RPAIN	protein-coding	chr17:5419641-5429665	+	hsa:84268	RPA interacting protein	-0.600745	0.000588338	508	732	451	383
BORCS8	protein-coding	chr19:19176904-19192591	-	hsa:729991	MEF2B neighbor	0.799067	0.000308469	167	209	300	376
LOC105370047	lncRNA	chr12:124512138-124516861	+		uncharacterized LOC105370047	3.52345	0.00843374	2	1	8	29
LOC105370007	lncRNA	chr12:116484427-116488505	-		uncharacterized LOC105370007	-0.962564	3.66986e-06	389	562	204	297
TTC12	protein-coding	chr11:113314529-113366392	+	hsa:54970	tetratricopeptide repeat domain 12	-0.778594	0.00679006	152	196	98	111
PCGF2	protein-coding	chr17:38733900-38747351	-	hsa:7703	polycomb group ring finger 2	1.36075	0.00444283	39	51	59	182
GRHL2	protein-coding	chr8:101492469-101668814	+	hsa:79977	grainyhead-like 2 (Drosophila)	-1.52742	0.00170509	64	82	29	23
TNFRSF6B	protein-coding	chr20:63696651-63698698	+	hsa:8771	tumor necrosis factor receptor superfamily, member 6b, decoy	1.03788	2.61553e-23	1117	1596	2789	2911
LINC00152	ncRNA	chr2:87455455-87521518	+	hsa:112597	long intergenic non-protein coding RNA 152	0.708491	0.000407743	202	258	379	395
SLCO5A1	protein-coding	chr8:69672333-69835064	-	hsa:81796	solute carrier organic anion transporter family, member 5A1	0.883841	2.87164e-05	320	466	543	950
ENKD1	protein-coding	chr16:67662947-67666725	-	hsa:84080	enkurin domain containing 1	-0.654252	0.00413689	232	336	182	187
UPP1	protein-coding	chr7:48089254-48108733	+	hsa:7378	uridine phosphorylase 1	-1.14733	2.09475e-12	608	898	346	348
SIPA1L2	protein-coding	chr1:232397965-232630470	-	hsa:57568	signal-induced proliferation-associated 1 like 2	-0.912692	7.45044e-08	604	878	347	460
SIPA1L3	protein-coding	chr19:37931760-38208369	+	hsa:23094	signal-induced proliferation-associated 1 like 3	1.25881	0.00587667	27	37	80	77
JMJD7	protein-coding	chr15:41828085-41837587	+	hsa:100137047	jumonji domain containing 7	0.769677	0.0431881	58	60	91	119
FNDC4	protein-coding	chr2:27491883-27495259	-	hsa:64838	fibronectin type III domain containing 4	0.801446	0.00434655	89	125	191	191
STK39	protein-coding	chr2:167954020-168247541	-	hsa:27347	serine threonine kinase 39	-0.803993	1.09202e-12	1522	1954	980	1071
GIPC1	protein-coding	chr19:14477759-14496149	-	hsa:10755	GIPC PDZ domain containing family, member 1	0.613594	3.21726e-11	3114	3636	5159	5541
PLCD3	protein-coding	chr17:45115508-45132518	-	hsa:113026	phospholipase C, delta 3	0.712064	3.92698e-10	1052	1231	1871	2001
MICAL1	protein-coding	chr6:109444062-109455987	-	hsa:64780	microtubule associated monooxygenase, calponin and LIM domain containing 1	0.829178	7.91851e-09	426	594	880	979
C17orf105	protein-coding	chr17:43779094-43784842	+	hsa:284067	chromosome 17 open reading frame 105	1.50695	0.00425493	15	31	60	72
GPRASP2	protein-coding	chrx:102712176-102717733	+	hsa:114928	G protein-coupled receptor associated sorting protein 2	-0.717244	0.0464322	101	113	67	68
AMOTL2	protein-coding	chr3:134355345-134375417	-	hsa:51421	angiomotin like 2	0.591162	7.15662e-06	1070	1129	1764	1682
NUMBL	protein-coding	chr19:40665905-40690658	-	hsa:9253	numb homolog (Drosophila)-like	0.714769	1.92689e-08	705	837	1293	1323
CASZ1	protein-coding	chr1:10647213-10694482	-	hsa:54897	castor zinc finger 1	0.955196	6.5326e-05	144	177	353	287
LOC105374101	lncRNA	chr3:129184054-129196304	+		uncharacterized LOC105374101	0.860107	0.0303916	42	60	85	105
LOC442517	pseudo	chr7:23562264-23564393	-		ATP-binding cassette, sub-family E (OABP), member 1 pseudogene	-4.22498	0.0351957	9	9	1	0
FRG1HP	miscRNA	chr9:40992337-41014139	+	hsa:100132352	FSHD region gene 1 pseudogene	-0.708227	0.0141403	153	202	96	128
CASP4	protein-coding	chr11:104942866-104956618	-	hsa:837	caspase 4, apoptosis-related cysteine peptidase	-0.68212	0.0146495	237	204	134	156
GNAI2	protein-coding	chr3:50246894-50259354	+	hsa:2771	guanine nucleotide binding protein (G protein), alpha inhibiting activity polypeptide 2	0.725779	0.0432643	69	71	101	141
LOC105374059	lncRNA	chr3:118771707-118773198	-		uncharacterized LOC105374059	-1.30567	0.0174141	49	56	22	22
FAAH2	protein-coding	chrx:57286578-57489196	+	hsa:158584	fatty acid amide hydrolase 2	-5.03229	0.0335907	4	8	0	0
LOC105374019	lncRNA	chr3:104334239-104336218	-		uncharacterized LOC105374019	-2.29765	0.0420179	19	13	2	5
LYL1	protein-coding	chr19:13099028-13103145	-	hsa:4066	lymphoblastic leukemia associated hematopoiesis regulator 1	1.64701	0.000308581	25	29	83	92
ATP6V1G1	protein-coding	chr9:114587714-114598872	+	hsa:9550	ATPase, H+ transporting, lysosomal 13kDa, V1 subunit G1	-0.586432	0.000317341	503	698	398	422
FRRS1	protein-coding	chr1:99708699-99765793	-	hsa:391059	ferric-chelate reductase 1	-1.01563	4.23376e-06	284	450	187	182
LYST	protein-coding	chr1:235734593-235866927	-	hsa:1130	lysosomal trafficking regulator	-1.10826	0.0241693	62	67	35	27
SCAMP5	protein-coding	chr15:74995535-75021495	+	hsa:192683	secretory carrier membrane protein 5	1.1194	1.26589e-09	214	360	601	666
CYB5R3	protein-coding	chr22:42617840-42646989	-	hsa:1727	cytochrome b5 reductase 3	0.67185	9.31482e-16	3412	4393	6139	6668
KDM5D	protein-coding	chry:19705415-19744939	-	hsa:8284	lysine (K)-specific demethylase 5D	-4.92841	0.0459308	8	2	0	0
KDM5B	protein-coding	chr1:202727404-202807288	-	hsa:10765	lysine (K)-specific demethylase 5B	-0.58722	3.56947e-05	815	1171	700	650
RN7SKP255	ncRNA	chr14:89712511-89712750	+		RNA, 7SK small nuclear pseudogene 255	0.644478	0.026057	118	201	184	325
RNU1-28P	pseudo	chr14:34556226-34556389	-	hsa:26866	RNA, U1 small nuclear 28, pseudogene	1.75477	0.0223471	9	10	22	45
KIAA1755	protein-coding	chr20:38210505-38260772	-	hsa:85449	KIAA1755	5.53313	0.0106791	0	0	3	15
CASC8	ncRNA	chr8:127443350-127482139	-	hsa:727677	cancer susceptibility candidate 8 (non-protein coding)	-0.786036	0.0401445	127	97	63	75
NLRC5	protein-coding	chr16:56989557-57083520	+	hsa:84166	NLR family, CARD domain containing 5	4.3823	0.0215623	1	0	12	10
LOC643219	ncRNA	chr2:95792212-95800191	+		glycerol-3-phosphate acyltransferase 2, mitochondrial pseudogene	0.820947	0.00549883	84	117	197	166
LOC105374715	lncRNA	chr5:33010865-33045543	-		uncharacterized LOC105374715	-5.28848	0.0180896	6	8	0	0
SPATA33	protein-coding	chr16:89657744-89670458	+	hsa:124045	spermatogenesis associated 33	0.697211	0.000311595	218	283	404	432
DSCC1	protein-coding	chr8:119833960-119855921	-	hsa:79075	DNA replication and sister chromatid cohesion 1	-0.58819	0.000153439	585	871	477	512
ABCC2	protein-coding	chr10:99782621-99830396	+	hsa:1244	ATP-binding cassette, sub-family C (CFTR/MRP), member 2	-1.45986	0.000265007	102	129	32	55
ABCD1	protein-coding	chrx:153724868-153744762	+	hsa:215	ATP-binding cassette, sub-family D (ALD), member 1	0.705772	0.00204545	253	234	458	372
BTN3A1	protein-coding	chr6:26402237-26415216	+	hsa:11119	butyrophilin, subfamily 3, member A1	-0.765811	0.00694272	199	205	136	111
PCNX3	protein-coding					0.629773	7.19594e-06	967	1294	1995	1584
LOC643168	pseudo	chr7:54933381-54939640	+		Rho GTPase activating protein 5 pseudogene	4.96181	0.0370128	0	0	4	8
C6orf99	protein-coding	chr6:158869865-158910353	+	hsa:100130967	chromosome 6 open reading frame 99	0.662038	0.0280095	92	116	187	151
CERCAM	protein-coding	chr9:128421574-128437351	+	hsa:51148	cerebral endothelial cell adhesion molecule	0.690205	2.01697e-09	956	1144	1700	1803
SPARC	protein-coding	chr5:151661096-151687054	-	hsa:6678	secreted protein, acidic, cysteine-rich (osteonectin)	4.65099	0.0147477	6	0	68	108
ABRACL	protein-coding	chr6:139028682-139043302	+	hsa:58527	ABRA C-terminal like	-0.777279	8.27616e-05	363	475	263	239
LINC00470	ncRNA	chr18:1268311-1359629	-	hsa:56651	long intergenic non-protein coding RNA 470	2.59395	0.0202851	1	6	29	12
ABCA3	protein-coding	chr16:2275878-2340746	-	hsa:21	ATP-binding cassette, sub-family A (ABC1), member 3	0.590771	0.0142357	152	204	300	249
IGFLR1	protein-coding	chr19:35739250-35742450	-	hsa:79713	IGF-like family receptor 1	1.17988	0.00040069	58	72	161	142
LOC692246	pseudo	chr22:42853082-42853940	-		cytochrome c oxidase assembly factor 1 homolog (S. cerevisiae) pseudogene	4.86759	0.0463322	0	0	8	3
FABP5	protein-coding	chr8:81280483-81284777	+	hsa:2171	fatty acid binding protein 5 (psoriasis-associated)	-0.977347	0.0168397	113	91	45	65
LOC105374585	lncRNA	chr2:46666962-46682929	+		uncharacterized LOC105374585	6.27831	0.000910564	0	0	8	22
NKX3-2	protein-coding	chr4:13540830-13544490	-	hsa:579	NK3 homeobox 2	1.45235	0.00860145	23	18	61	57
IL20RB	protein-coding	chr3:136958143-137011085	+	hsa:53833	interleukin 20 receptor beta	0.862187	0.0490032	44	40	77	83
LINC00341	ncRNA	chr14:95407266-95410090	-	hsa:79686	long intergenic non-protein coding RNA 341	1.24707	0.00765014	38	30	68	103
RGS16	protein-coding	chr1:182598623-182604413	-	hsa:6004	regulator of G-protein signaling 16	-1.27212	0.0020655	149	94	52	56
LINC00337	ncRNA	chr1:6236240-6239444	+	hsa:148645	long intergenic non-protein coding RNA 337	1.20762	0.0142088	21	37	64	72
SERPINA1	protein-coding	chr14:94376747-94390692	-	hsa:5265	serpin peptidase inhibitor, clade A (alpha-1 antiproteinase, antitrypsin), member 1	2.45833	4.50119e-08	16	30	96	162
EIF4E3	protein-coding	chr3:71679972-71754831	-	hsa:317649	eukaryotic translation initiation factor 4E family member 3	-1.03662	3.69343e-05	236	353	164	128
RPL34	protein-coding	chr4:108620590-108625370	+	hsa:6164	ribosomal protein L34	-0.58897	5.73346e-11	5203	7073	4260	4103
RPL31	protein-coding	chr2:101002229-101006423	+	hsa:6160	ribosomal protein L31	-0.767577	9.83391e-12	1605	1974	1044	1127
RPL17	protein-coding	chr18:49488481-49492565	-	hsa:6139	ribosomal protein L17	-0.612012	5.52517e-07	1111	1517	842	923
TRS-AGA2-6	tRNA	chr17:8226610-8226691	-		transfer RNA-Ser (AGA) 2-6	5.10583	0.0273889	0	0	9	4
ZEB1	protein-coding	chr10:31321135-31529202	+	hsa:6935	zinc finger E-box binding homeobox 1	6.74287	0.00012796	0	0	18	23
CNTROB	protein-coding	chr17:7932218-7949578	+	hsa:116840	centrobin, centrosomal BRCA2 interacting protein	0.688695	8.04532e-11	1365	1613	2388	2580
NUPR1	protein-coding	chr16:28537341-28539174	-	hsa:26471	nuclear protein, transcriptional regulator, 1	5.32622	0.0192245	0	0	13	2
ENPP1	protein-coding	chr6:131808016-131895155	+	hsa:5167	ectonucleotide pyrophosphatase/phosphodiesterase 1	-4.32562	0.0291952	10	9	0	1
ENPP5	protein-coding	chr6:46159182-46171045	-	hsa:59084	ectonucleotide pyrophosphatase/phosphodiesterase 5 (putative)	-1.10306	0.000911629	144	159	82	64
SERPINB5	protein-coding	chr18:63476911-63505085	+	hsa:5268	serpin peptidase inhibitor, clade B (ovalbumin), member 5	-0.717798	0.0234775	139	177	115	82
SERPINB8	protein-coding	chr18:63970101-63987396	+	hsa:5271	serpin peptidase inhibitor, clade B (ovalbumin), member 8	-1.20786	0.00153778	97	139	41	64
YWHAZP2	pseudo	chr2:126555301-126558179	-		tyrosine 3-monooxygenase/tryptophan 5-monooxygenase activation protein, zeta pseudogene 2	-1.0322	0.024962	65	77	31	41
STON2	protein-coding	chr14:81260652-81398580	-	hsa:85439	stonin 2	-2.17025	2.49564e-05	83	98	11	31
LINC00174	ncRNA	chr7:66376044-66400408	-	hsa:285908	long intergenic non-protein coding RNA 174	1.8142	0.0048318	7	23	60	44
FAM171A2	protein-coding	chr17:44353215-44359103	-	hsa:284069	family with sequence similarity 171, member A2	0.656092	0.000425074	267	420	581	519
SCARA3	protein-coding	chr8:27633889-27700373	+	hsa:51435	scavenger receptor class A, member 3	1.23139	6.4077e-21	1422	1362	3228	3630
ZFAT	protein-coding	chr8:134477788-134713049	-	hsa:57623	zinc finger and AT hook domain containing	0.712595	0.0179571	110	101	164	199
SH3TC2	protein-coding	chr5:148982150-149063174	-	hsa:79628	SH3 domain and tetratricopeptide repeats 2	0.698929	2.84859e-05	328	423	572	685
SH3TC1	protein-coding	chr4:8199371-8241100	+	hsa:54436	SH3 domain and tetratricopeptide repeats 1	0.805396	0.0230569	72	66	116	137
LOC100506730	ncRNA	chr1:19293247-19295736	-	hsa:100506730	uncharacterized LOC100506730	-1.04909	0.0346961	55	65	29	31
DHRS13	protein-coding	chr17:28897781-28903071	-	hsa:147015	dehydrogenase/reductase (SDR family) member 13	0.584624	0.00295433	226	371	420	491
LOC105376025	lncRNA	chr9:35013523-35024765	-		uncharacterized LOC105376025	5.08754	0.0273303	0	0	6	7
MDGA1	protein-coding	chr6:37632517-37696934	-	hsa:266727	MAM domain containing glycosylphosphatidylinositol anchor 1	0.953294	0.00770523	95	62	164	160
POLR3G	protein-coding	chr5:90474842-90514555	+	hsa:10622	polymerase (RNA) III (DNA directed) polypeptide G (32kD)	-0.736777	0.000117127	659	619	423	380
CITED1	protein-coding	chrx:72301638-72305914	-	hsa:4435	Cbp/p300-interacting transactivator, with Glu/Asp-rich carboxy-terminal domain, 1	0.910554	0.0025484	86	93	178	171
DGKZ	protein-coding	chr11:46345395-46380553	+	hsa:8525	diacylglycerol kinase, zeta	0.695182	6.32137e-09	970	1102	1684	1795
MADD	protein-coding	chr11:47269648-47330031	+	hsa:8567	MAP-kinase activating death domain	0.812496	0.0212654	61	72	127	114
TGFB1	protein-coding	chr19:41330531-41353933	-	hsa:7040	transforming growth factor, beta 1	1.11429	9.30111e-29	1386	1697	3440	3446
MAFA	protein-coding	chr8:143428060-143430432	-	hsa:389692	v-maf avian musculoaponeurotic fibrosarcoma oncogene homolog A	0.935602	0.0101889	50	69	123	110
POLR1B	protein-coding	chr2:112541915-112577153	+	hsa:84172	polymerase (RNA) I polypeptide B, 128kDa	-0.624092	8.75771e-09	1620	2163	1237	1284
LOC100506844	lncRNA	chr12:57931449-57936164	-	hsa:100506844	uncharacterized LOC100506844	1.10137	0.0141271	37	36	88	75
MAL2	protein-coding	chr8:119208371-119245673	+	hsa:114569	mal, T-cell differentiation protein 2 (gene/pseudogene)	-3.1262	4.01428e-170	3540	4993	452	550
ADAMTSL5	protein-coding	chr19:1505018-1513020	-	hsa:339366	ADAMTS-like 5	1.35468	2.69122e-10	151	175	450	411
MC1R	protein-coding	chr16:89917879-89920977	+	hsa:4157	melanocortin 1 receptor (alpha melanocyte stimulating hormone receptor)	0.587678	0.00365951	204	273	367	369
MAOB	protein-coding	chrx:43766610-43846627	-	hsa:4129	monoamine oxidase B	-1.04615	9.62849e-17	1331	1653	763	726
MAP2	protein-coding	chr2:209579560-209734118	+	hsa:4133	microtubule-associated protein 2	-2.19173	0.000806164	42	51	11	10
MAP7	protein-coding	chr6:136342281-136526213	-	hsa:9053	microtubule-associated protein 7	-0.956504	3.63313e-06	339	457	188	234
ZC3H4	protein-coding	chr19:47064187-47114436	-	hsa:23211	zinc finger CCCH-type containing 4	0.607681	3.41566e-07	819	1034	1381	1531
SLC43A2	protein-coding	chr17:1569254-1628375	-	hsa:124935	solute carrier family 43 (amino acid system L transporter), member 2	2.23655	0.00292681	5	15	24	71
HTR7	protein-coding	chr10:90740818-90857914	-	hsa:3363	5-hydroxytryptamine (serotonin) receptor 7, adenylate cyclase-coupled	-1.00167	2.67581e-05	244	348	160	142
MBD6	protein-coding	chr12:57523063-57530148	+	hsa:114785	methyl-CpG binding domain protein 6	0.747036	0.000636998	166	224	349	322
AXIN2	protein-coding	chr17:65528563-65561622	-	hsa:8313	axin 2	1.68514	2.1524e-21	178	290	741	791
SPIDR	protein-coding	chr8:47279862-47735913	+	hsa:23514	scaffolding protein involved in DNA repair	-0.635783	0.00498613	268	326	209	185
RNPEPL1	protein-coding	chr2:240568526-240578732	+	hsa:57140	arginyl aminopeptidase (aminopeptidase B)-like 1	0.715718	3.13998e-05	540	726	1229	895
IFITM2	protein-coding	chr11:308107-309410	+	hsa:10581	interferon induced transmembrane protein 2	0.681182	8.90468e-11	1288	1588	2254	2509
IFITM1	protein-coding	chr11:313991-315272	+	hsa:8519	interferon induced transmembrane protein 1	0.691331	0.000111703	329	374	619	555
SPHK2	protein-coding	chr19:48625080-48630407	+	hsa:56848	sphingosine kinase 2	0.774928	0.000250873	191	269	437	367
CSPG4	protein-coding	chr15:75674322-75712848	-	hsa:1464	chondroitin sulfate proteoglycan 4	1.14589	5.54508e-19	597	825	1672	1549
RCHY1	protein-coding	chr4:75479037-75514430	-	hsa:25898	ring finger and CHY zinc finger domain containing 1, E3 ubiquitin protein ligase	-0.64716	0.000792956	343	504	262	291
MCAM	protein-coding	chr11:119308526-119317132	-	hsa:4162	melanoma cell adhesion molecule	1.35801	2.34318e-36	1290	1443	3440	3837
UBTD1	protein-coding	chr10:97498882-97571210	+	hsa:80019	ubiquitin domain containing 1	0.606789	2.02379e-05	500	615	841	912
DIO3	protein-coding	chr14:101561351-101563452	+	hsa:1735	deiodinase, iodothyronine, type III	1.3277	0.0302351	22	15	58	40
STARD8	protein-coding	chrx:68647669-68725842	+	hsa:9754	StAR-related lipid transfer (START) domain containing 8	0.965326	2.44942e-10	443	483	933	944
FOXD2-AS1	ncRNA	chr1:47432133-47434641	-	hsa:84793	FOXD2 antisense RNA 1 (head to head)	0.60531	0.0488659	89	127	135	203
LOC100506571	protein-coding	chr1:228073909-228080597	-	hsa:100506571	uncharacterized LOC100506571	1.14204	0.0051532	37	47	92	99
SCAF1	protein-coding	chr19:49640483-49658642	+	hsa:58506	SR-related CTD-associated factor 1	0.851356	1.3311e-14	1483	1759	3136	2904
C8orf76	protein-coding	chr8:123219956-123241398	-	hsa:84933	chromosome 8 open reading frame 76	-1.30208	0.00346412	93	150	71	28
SLC45A1	protein-coding	chr1:8318108-8344165	+	hsa:50651	solute carrier family 45, member 1	1.09586	3.91743e-07	182	203	369	487
C8orf58	protein-coding	chr8:22599601-22604150	+	hsa:541565	chromosome 8 open reading frame 58	0.603667	0.00134986	262	321	471	442
NAALADL2	protein-coding	chr3:174523413-175809510	+	hsa:254827	N-acetylated alpha-linked acidic dipeptidase-like 2	1.52718	0.0466364	12	8	32	29
LOC101927673	ncRNA	chr11:64000355-64007076	+	hsa:101927673	uncharacterized LOC101927673	2.24505	0.0127149	8	3	32	24
LOC105376539	lncRNA	chr11:8766786-8778567	+		uncharacterized LOC105376539	5.63181	0.00661043	0	0	8	11
RPS24	protein-coding	chr10:78033760-78040716	+	hsa:6229	ribosomal protein S24	-0.583713	3.42455e-09	4614	7024	3950	3955
MDH1	protein-coding	chr2:63588609-63607197	+	hsa:4190	malate dehydrogenase 1, NAD (soluble)	-0.758222	1.21598e-13	2615	3811	1921	1959
NPTN-IT1	ncRNA	chr15:73566938-73569543	-	hsa:101241892	NPTN intronic transcript 1 (non-protein coding)	-0.980658	0.0498417	50	73	25	39
LOC101927963	ncRNA	chr8:141125940-141130279	-	hsa:101927963	uncharacterized LOC101927963	1.14075	0.00267567	54	52	102	143
TPD52L1	protein-coding	chr6:125153729-125264407	+	hsa:7164	tumor protein D52-like 1	-1.24824	0.0202503	66	62	17	40
LOC105376481	lncRNA	chr10:31032534-31113931	+		uncharacterized LOC105376481	4.32888	0.0269378	1	0	16	5
FAM92B	protein-coding	chr16:85098352-85112508	-	hsa:339145	family with sequence similarity 92, member B	2.53288	0.0212388	1	6	16	24
MEA1	protein-coding	chr6:43012013-43016886	-	hsa:4201	male-enhanced antigen 1	0.63348	0.00014108	687	646	965	1209
DKK1	protein-coding	chr10:52314281-52317657	+	hsa:22943	dickkopf WNT signaling pathway inhibitor 1	0.650353	1.79904e-13	2525	3432	4680	4914
DKK4	protein-coding	chr8:42374068-42377156	-	hsa:27121	dickkopf WNT signaling pathway inhibitor 4	3.83383	0.00294578	0	3	22	20
B4GALT1-AS1	lncRNA	chr9:33166948-33179983	+	hsa:101929639	B4GALT1 antisense RNA 1	5.8568	0.00336227	0	0	13	9
SH3YL1	protein-coding	chr2:218136-264097	-	hsa:26751	SH3 and SYLF domain containing 1	-0.951644	0.0040834	150	145	70	90
KIF17	protein-coding	chr1:20662294-20717770	-	hsa:57576	kinesin family member 17	0.910513	0.0461151	53	35	72	105
KIF12	protein-coding	chr9:114091638-114099057	-	hsa:113220	kinesin family member 12	0.991829	0.00580964	53	64	122	118
SYDE1	protein-coding	chr19:15107364-15114988	+	hsa:85360	synapse defective 1, Rho GTPase, homolog 1 (C. elegans)	1.63767	4.1148e-17	210	203	619	725
SNORD35A	snoRNA	chr19:49491175-49491260	+	hsa:26816	small nucleolar RNA, C/D box 35A	-1.10023	0.0206143	64	83	25	46
KIF3C	protein-coding	chr2:25926586-25982574	-	hsa:3797	kinesin family member 3C	0.686227	0.000385403	263	296	484	447
OXCT2P1	pseudo	chr1:39514866-39516669	+		3-oxoacid CoA transferase 2 pseudogene 1	4.17763	0.00320121	2	0	20	19
DPYSL4	protein-coding	chr10:132187974-132205751	+	hsa:10570	dihydropyrimidinase-like 4	1.09356	0.000398334	121	88	252	220
C1QL1	protein-coding	chr17:44959693-44968276	-	hsa:10882	complement component 1, q subcomponent-like 1	1.68359	2.12482e-05	28	69	121	192
DLG4	protein-coding	chr17:7189890-7219820	-	hsa:1742	discs, large homolog 4 (Drosophila)	0.606701	0.00641063	185	214	325	303
HNF4A	protein-coding	chr20:44355801-44432845	+	hsa:3172	hepatocyte nuclear factor 4, alpha	1.3259	0.0297054	18	17	38	54
DLK2	protein-coding	chr6:43450352-43456632	-	hsa:65989	delta-like 2 homolog (Drosophila)	1.02707	0.00302625	61	65	126	141
HNF1B	protein-coding	chr17:37686431-37745059	-	hsa:6928	HNF1 homeobox B	1.14178	0.0341943	37	19	66	67
CBARP	protein-coding	chr19:1231105-1238512	-	hsa:255057	chromosome 19 open reading frame 26	0.595783	0.00931432	169	240	345	286
C22orf34	protein-coding	chr22:49606325-49620443	-	hsa:348645	chromosome 22 open reading frame 34	-0.864092	0.000680117	200	264	129	133
TCAF1	protein-coding	chr7:143851377-143882883	-	hsa:9747	family with sequence similarity 115, member A	-0.790365	0.000690961	287	309	163	196
DLX1	protein-coding	chr2:172085480-172089674	+	hsa:1745	distal-less homeobox 1	1.1256	0.0119873	31	41	88	73
MMADHC	protein-coding	chr2:149569633-149587816	-	hsa:27249	methylmalonic aciduria (cobalamin deficiency) cblD type, with homocystinuria	-0.584775	5.32993e-07	2125	3332	1884	1812
RPL6P27	pseudo	chr18:6462110-6463029	-		ribosomal protein L6 pseudogene 27	-0.609897	1.98686e-06	1230	1622	1012	905
RPL6P19	pseudo	chr7:137721968-137722889	+		ribosomal protein L6 pseudogene 19	-0.782991	0.000291545	302	372	182	223
RPL6P10	pseudo	chr4:65573440-65574362	+		ribosomal protein L6 pseudogene 10	-0.67971	0.00743107	188	275	153	142
LOC105376277	lncRNA	chr9:126608094-126612613	-		uncharacterized LOC105376277	2.5048	0.00172885	6	6	30	41
UNC93B5	pseudo	chr11:67711255-67716006	-	hsa:729196	unc-93 homolog B5 pseudogene (C. elegans)	4.23041	0.0302798	1	0	8	12
LOC105376286	lncRNA	chr9:128313825-128315585	+		uncharacterized LOC105376286	4.8532	0.045533	0	0	6	5
LOC105376236	lncRNA	chr9:115989341-116017328	+		uncharacterized LOC105376236	-5.42426	0.0128329	8	7	0	0
DMPK	protein-coding	chr19:45769709-45779619	-	hsa:1760	dystrophia myotonica-protein kinase	0.800557	8.98578e-07	359	416	652	747
DMTN	protein-coding	chr8:22054817-22082527	+	hsa:2039	dematin actin binding protein	0.615304	1.14534e-07	948	1375	1713	1929
ADAMTS15	protein-coding	chr11:130448974-130476644	+	hsa:170689	ADAM metallopeptidase with thrombospondin type 1 motif, 15	1.51199	0.00211833	30	23	67	93
DMWD	protein-coding	chr19:45783006-45792802	-	hsa:1762	dystrophia myotonica, WD repeat containing	0.887663	2.87226e-07	319	348	635	646
VASP	protein-coding	chr19:45507430-45526983	+	hsa:7408	vasodilator-stimulated phosphoprotein	0.635927	4.47819e-09	2421	2596	3859	4264
DNER	protein-coding	chr2:229357629-229714570	-	hsa:92737	delta/notch-like EGF repeat containing	-5.08119	0.0335074	2	11	0	0
KIFC2	protein-coding	chr8:144466247-144474116	+	hsa:90990	kinesin family member C2	0.6219	0.0044864	182	294	399	344
ZNF3	protein-coding	chr7:100069973-100081762	-	hsa:7551	zinc finger protein 3	-0.632389	0.000192156	537	617	365	407
SNORD142	snoRNA					2.08332	0.0490824	5	3	17	19
RPS4Y1	protein-coding	chry:2841582-2866956	+	hsa:6192	ribosomal protein S4, Y-linked 1	-8.41479	6.06939e-08	57	64	0	0
DNM2	protein-coding	chr19:10718053-10831910	+	hsa:1785	dynamin 2	0.727612	1.11071e-05	418	465	675	846
KMT2D	protein-coding	chr12:49018975-49060854	-	hsa:8085	lysine (K)-specific methyltransferase 2D	0.58291	2.99557e-07	1555	1993	2899	2560
LOC105376134	lncRNA	chr9:88527960-88534100	-		uncharacterized LOC105376134	5.20883	0.0210557	0	0	9	5
PIK3R3	protein-coding	chr1:46040140-46132708	-	hsa:8503	phosphoinositide-3-kinase, regulatory subunit 3 (gamma)	1.19644	0.000421321	54	73	162	136
MS4A15	protein-coding	chr11:60756867-60776731	+	hsa:219995	membrane-spanning 4-domains, subfamily A, member 15	1.2642	0.000480872	44	59	127	127
FSCN2	protein-coding	chr17:81528391-81537130	+	hsa:25794	fascin actin-bundling protein 2, retinal	0.709747	0.0184191	76	149	176	195
HNRNPR	protein-coding	chr1:23304688-23344364	-	hsa:10236	heterogeneous nuclear ribonucleoprotein R	-0.942789	0.0158642	100	229	54	118
PITPNM1	protein-coding	chr11:67491760-67505038	-	hsa:9600	phosphatidylinositol transfer protein, membrane-associated 1	0.583398	1.33522e-07	1417	1608	2257	2446
PITPNM2	protein-coding	chr12:122983480-123034586	-	hsa:57605	phosphatidylinositol transfer protein, membrane-associated 2	0.740218	0.000306815	298	298	567	469
DOCK4	protein-coding	chr7:111726741-112206394	-	hsa:9732	dedicator of cytokinesis 4	-1.5134	0.0309793	33	36	15	10
DOCK1	protein-coding	chr10:126905409-127452517	+	hsa:1793	dedicator of cytokinesis 1	-0.640251	1.99985e-05	696	859	475	556
LOC390937	protein-coding	chr19:41907549-41928721	-	hsa:390937	Ets2 repressor factor-like	2.24652	0.0131117	7	4	36	19
C1orf127	protein-coding	chr1:10946473-10970068	-	hsa:148345	chromosome 1 open reading frame 127	5.16861	0.0268033	0	0	2	12
MIA-RAB4B	ncRNA	chr19:40775537-40796944	+	hsa:100529262	MIA-RAB4B readthrough (NMD candidate)	3.1447	1.96242e-11	6	31	153	170
C1orf159	protein-coding	chr1:1081811-1116213	-	hsa:54991	chromosome 1 open reading frame 159	0.60827	0.00172707	273	301	412	498
C1orf167	protein-coding	chr1:11762449-11789585	+	hsa:284498	chromosome 1 open reading frame 167	5.37516	0.0140498	0	0	5	11
MIA3	protein-coding	chr1:222618102-222668012	+	hsa:375056	melanoma inhibitory activity family, member 3	-0.679852	0.0175354	145	206	116	108
DOK7	protein-coding	chr4:3463306-3494482	+	hsa:285489	docking protein 7	4.24474	0.00430713	2	0	6	36
DOK4	protein-coding	chr16:57471958-57479799	-	hsa:55715	docking protein 4	0.754988	3.48291e-05	419	390	670	763
MIG7	miscRNA	chr1:93749885-93776375	-		mig-7	-1.70677	0.0133901	36	39	9	15
MIIP	protein-coding	chr1:12019242-12032049	+	hsa:60672	migration and invasion inhibitory protein	0.643819	8.63182e-05	337	422	588	635
MIOX	protein-coding	chr22:50483988-50489009	+	hsa:55586	myo-inositol oxygenase	1.04051	0.000629705	74	122	233	175
UTP18	protein-coding	chr17:51260536-51297933	+	hsa:51096	UTP18 small subunit (SSU) processome component homolog (yeast)	-0.794101	3.46134e-07	775	1224	618	552
TRR-ACG2-1	tRNA	chr3:45688999-45689071	-		transfer RNA-Arg (ACG) 2-1	4.96181	0.0370128	0	0	4	8
C1orf204	protein-coding	chr1:159834474-159855347	-	hsa:284677	chromosome 1 open reading frame 204	-1.62641	0.041457	17	42	9	10
C1orf210	protein-coding	chr1:43281883-43285579	-	hsa:149466	chromosome 1 open reading frame 210	-1.33715	1.5837e-05	147	234	83	70
C1orf228	protein-coding	chr1:44674706-44725591	+	hsa:339541	chromosome 1 open reading frame 228	4.87481	0.0481811	0	0	9	2
GLIS3-AS1	ncRNA	chr9:3898646-3901248	+	hsa:84850	GLIS3 antisense RNA 1	5.27834	0.0184597	0	0	4	11
VTI1B	protein-coding	chr14:67651149-67674885	-	hsa:10490	vesicle transport through interaction with t-SNAREs 1B	-1.02224	0.000234774	171	233	102	102
VTI1A	protein-coding	chr10:112446988-112786282	+	hsa:143187	vesicle transport through interaction with t-SNAREs 1A	-0.628433	0.00457633	340	726	341	348
FAM65A	protein-coding	chr16:67529791-67546786	+	hsa:79567	family with sequence similarity 65, member A	0.698082	1.14962e-10	1228	1489	2280	2270
MIR1244-1	ncRNA	chr2:231713368-231713393	+	hsa:100302285	microRNA 1244-1	-0.811258	0.00914162	131	216	113	87
LOC105371901	lncRNA	chr17:77124238-77136871	-		uncharacterized LOC105371901	0.819109	0.0306661	42	86	114	113
FAM63B	protein-coding	chr15:58771194-58861900	+	hsa:54629	family with sequence similarity 63, member B	0.677815	0.00101049	188	274	385	370
LZTS2	protein-coding	chr10:100997065-101007836	+	hsa:84445	leucine zipper, putative tumor suppressor 2	0.696048	6.26576e-14	1892	2466	3558	3704
LZTS1	protein-coding	chr8:20246165-20261822	-	hsa:11178	leucine zipper, putative tumor suppressor 1	1.48778	2.81766e-12	137	165	401	475
ATG2B	protein-coding	chr14:96285930-96363341	-	hsa:55102	autophagy related 2B	-0.707029	0.0205476	135	215	88	131
ATG4A	protein-coding	chrx:108091667-108154671	+	hsa:115201	autophagy related 4A, cysteine peptidase	0.694632	0.0284556	85	92	155	142
FARSB	protein-coding	chr2:222571743-222656089	-	hsa:10056	phenylalanyl-tRNA synthetase, beta subunit	-0.596998	1.46904e-07	1539	2206	1264	1267
LOC105371814	lncRNA	chr17:48874860-48908983	-		uncharacterized LOC105371814	-1.12532	0.0275952	50	77	36	23
FAM73B	protein-coding	chr9:129036620-129072082	+	hsa:84895	family with sequence similarity 73, member B	0.656098	0.00122831	236	259	373	438
MKL1	protein-coding	chr22:40410289-40533811	-	hsa:57591	megakaryoblastic leukemia (translocation) 1	0.588672	2.71041e-05	503	692	868	977
GNRH1	protein-coding	chr8:25419258-25425040	-	hsa:2796	gonadotropin-releasing hormone 1 (luteinizing-releasing hormone)	4.07444	0.0417776	1	0	7	11
ELOVL6	protein-coding	chr4:110049365-110199199	-	hsa:79071	ELOVL fatty acid elongase 6	-0.588132	0.000251427	525	696	402	433
RPS8P8	pseudo	chr5:33162156-33162859	+		ribosomal protein S8 pseudogene 8	-0.73363	0.0117325	145	214	119	101
DRD1	protein-coding	chr5:175440672-175444160	-	hsa:1812	dopamine receptor D1	2.33201	0.000189327	16	8	49	81
C12orf66	protein-coding	chr12:64192639-64222296	-	hsa:144577	chromosome 12 open reading frame 66	-0.652299	0.000240471	433	595	344	326
FAM84B	protein-coding	chr8:126552537-126558499	-	hsa:157638	family with sequence similarity 84, member B	-0.639908	2.18663e-05	731	1089	622	568
RNU5E-6P	pseudo	chr1:44819883-44819997	-		RNA, U5E small nuclear 6, pseudogene	1.20561	0.000279145	62	69	138	176
RNU5E-4P	pseudo	chr1:11909808-11909927	-		RNA, U5E small nuclear 4, pseudogene	1.56584	1.14954e-05	56	52	133	203
FAM83B	protein-coding	chr6:54867630-54942631	+	hsa:222584	family with sequence similarity 83, member B	-0.798133	0.000336475	259	404	195	193
MLPH	protein-coding	chr2:237487219-237555318	+	hsa:79083	melanophilin	0.865925	1.1903e-05	235	267	499	447
FAM83H	protein-coding	chr8:143723933-143733657	-	hsa:286077	family with sequence similarity 83, member H	1.56903	0.000159983	53	51	218	101
DFNA5	protein-coding	chr7:24698355-24758020	-	hsa:1687	deafness, autosomal dominant 5	0.623687	0.0112581	187	186	329	269
SCML1	protein-coding	chrx:17740939-17754985	+	hsa:6322	sex comb on midleg-like 1 (Drosophila)	-0.991137	0.0499817	59	57	31	30
DSC2	protein-coding	chr18:31065974-31102432	-	hsa:1824	desmocollin 2	-0.707373	2.25563e-06	786	901	501	571
BTBD19	protein-coding	chr1:44807444-44814199	+	hsa:149478	BTB (POZ) domain containing 19	1.00606	0.0258929	47	35	72	103
BTBD11	protein-coding	chr12:107320103-107659642	+	hsa:121551	BTB (POZ) domain containing 11	-2.09357	0.00107078	47	62	19	7
YWHAEP1	pseudo	chr7:64433693-64435520	+	hsa:649395	tyrosine 3-monooxygenase/tryptophan 5-monooxygenase activation protein, epsilon pseudogene 1	-1.40829	0.0026981	59	122	41	27
FAM13A	protein-coding	chr4:88725960-89057195	-	hsa:10144	family with sequence similarity 13, member A	-0.780285	0.00302917	174	277	133	134
FBXO32	protein-coding	chr8:123497887-123541253	-	hsa:114907	F-box protein 32	-0.652522	0.0485417	102	160	77	93
TTYH3	protein-coding	chr7:2631969-2664802	+	hsa:80727	tweety family member 3	0.660668	0.0399328	815	1112	1854	1250
INHBB	protein-coding	chr2:120346143-120351807	+	hsa:3625	inhibin, beta B	2.60319	0.000897695	6	6	32	44
SPSB4	protein-coding	chr3:141051317-141093884	+	hsa:92369	splA/ryanodine receptor domain and SOCS box containing 4	2.25244	0.0114673	3	11	49	16
ACTR10	protein-coding	chr14:58200170-58234801	+	hsa:55860	actin-related protein 10 homolog (S. cerevisiae)	-0.608575	0.00158205	420	467	274	331
MMP9	protein-coding	chr20:46008908-46016561	+	hsa:4318	matrix metallopeptidase 9 (gelatinase B, 92kDa gelatinase, 92kDa type IV collagenase)	-3.21702	0.0208488	9	19	2	1
EFHD1	protein-coding	chr2:232638127-232682781	+	hsa:80303	EF-hand domain family, member D1	4.94822	0.041796	0	0	2	10
DIO3OS	ncRNA	chr14:101552223-101555676	-	hsa:64150	DIO3 opposite strand/antisense RNA (head to head)	5.22017	0.0223689	0	0	11	3
OLFML2A	protein-coding	chr9:124777158-124814885	+	hsa:169611	olfactomedin-like 2A	1.31067	1.44253e-23	473	582	1320	1380
SCN1B	protein-coding	chr19:35030688-35037720	+	hsa:6324	sodium channel, voltage-gated, type I, beta subunit	1.19169	1.08039e-06	121	134	277	328
LOC101927039	ncRNA	chr8:96235657-96239422	+	hsa:101927039	uncharacterized LOC101927039	2.12785	0.00057617	12	13	42	72
SCN4B	protein-coding	chr11:118133377-118145469	-	hsa:6330	sodium channel, voltage-gated, type IV, beta subunit	1.97614	0.0107308	12	5	37	35
SLFN5	protein-coding	chr17:35243067-35267749	+	hsa:162394	schlafen family member 5	-0.595387	0.0134928	286	292	217	181
TRIM47	protein-coding	chr17:75874164-75877828	-	hsa:91107	tripartite motif containing 47	0.766751	4.82186e-12	1381	1591	2654	2580
TRIM52	protein-coding	chr5:181256372-181261118	-	hsa:84851	tripartite motif containing 52	-0.75881	0.0438704	76	142	62	68
SYNGR3	protein-coding	chr16:1989945-1994275	+	hsa:9143	synaptogyrin 3	0.851585	0.00100923	130	135	256	241
LOC100506098	ncRNA	chr7:20217577-20221700	+	hsa:100506098	uncharacterized LOC100506098	-2.67253	0.025005	16	22	6	0
COPG2	protein-coding	chr7:130546787-130668758	-	hsa:26958	coatomer protein complex, subunit gamma 2	-0.922553	0.000164887	224	303	148	137
PDE4A	protein-coding	chr19:10432435-10469631	+	hsa:5141	phosphodiesterase 4A, cAMP-specific	0.645937	9.61186e-10	1197	1624	2253	2275
PDE2A	protein-coding	chr11:72576140-72642460	-	hsa:5138	phosphodiesterase 2A, cGMP-stimulated	1.00646	0.000592387	90	96	176	213
LMX1B	protein-coding	chr9:126614443-126701032	+	hsa:4010	LIM homeobox transcription factor 1, beta	0.647177	1.18902e-05	525	616	955	891
ARHGAP33	protein-coding	chr19:35775519-35788822	+	hsa:115703	Rho GTPase activating protein 33	1.03963	0.00169765	74	90	207	139
SLIRP	protein-coding	chr14:77708071-77717598	+	hsa:81892	SRA stem-loop interacting RNA binding protein	-0.618665	2.35669e-05	758	1191	622	670
ARHGAP42	protein-coding	chr11:100715111-100993941	+	hsa:143872	Rho GTPase activating protein 42	1.25509	0.0407365	15	20	39	47
ZFP64	protein-coding	chr20:52084011-52191985	-	hsa:55734	ZFP64 zinc finger protein	0.988767	0.0294223	34	38	74	74
DPY19L1P1	pseudo	chr7:32580939-32719168	-	hsa:100129460	DPY19L1 pseudogene 1	-1.1628	0.0334385	46	56	24	23
ZFP41	protein-coding	chr8:143246928-143262705	+	hsa:286128	ZFP41 zinc finger protein	0.60204	0.0031152	229	255	373	389
ICA1	protein-coding	chr7:8113184-8262612	-	hsa:3382	islet cell autoantigen 1, 69kDa	-0.624375	0.0448969	116	176	99	94
LOC101927325	ncRNA	chr7:6505601-6510054	+	hsa:101927325	uncharacterized LOC101927325	-4.55438	0.0174846	9	14	0	1
PKMYT1	protein-coding	chr16:2972791-2980539	-	hsa:9088	protein kinase, membrane associated tyrosine/threonine 1	0.636364	8.79971e-07	1162	1295	2100	1856
IQGAP1	protein-coding	chr15:90388272-90501555	+	hsa:8826	IQ motif containing GTPase activating protein 1	-0.698337	5.40508e-10	1559	2214	1138	1243
MIR4736	ncRNA	chr17:58336004-58336022	-	hsa:100616220	microRNA 4736	4.95506	0.0388928	0	0	3	9
ZFP14	protein-coding	chr19:36334453-36379121	-	hsa:57677	ZFP14 zinc finger protein	-0.894672	0.0436422	66	80	42	39
MGAT5B	protein-coding	chr17:76868496-76947795	+	hsa:146664	mannosyl (alpha-1,6-)-glycoprotein beta-1,6-N-acetyl-glucosaminyltransferase, isozyme B	2.00117	8.03156e-08	50	37	210	156
MGAT4A	protein-coding	chr2:98619106-98663473	-	hsa:11320	mannosyl (alpha-1,3-)-glycoprotein beta-1,4-N-acetylglucosaminyltransferase, isozyme A	-2.83251	8.12643e-12	149	150	17	27
PPP1R14C	protein-coding	chr6:150195729-150250392	+	hsa:81706	protein phosphatase 1, regulatory (inhibitor) subunit 14C	-1.52651	2.24673e-06	137	252	71	65
ZCCHC24	protein-coding	chr10:79382325-79445627	-	hsa:219654	zinc finger, CCHC domain containing 24	0.826597	4.49682e-05	208	281	479	409
ZCCHC12	protein-coding	chrx:118823743-118826973	+	hsa:170261	zinc finger, CCHC domain containing 12	1.14204	0.0118319	29	39	78	76
INPP5E	protein-coding	chr9:136428619-136439861	-	hsa:56623	inositol polyphosphate-5-phosphatase, 72 kDa	0.863768	4.6584e-08	344	428	720	728
FAM46C	protein-coding	chr1:117605982-117628389	+	hsa:54855	family with sequence similarity 46, member C	-0.812554	0.0258467	85	142	67	64
FAM46B	protein-coding	chr1:27005020-27012842	-	hsa:115572	family with sequence similarity 46, member B	1.13617	6.33656e-19	706	818	1579	1896
MPP7	protein-coding	chr10:28050993-28303066	-	hsa:143098	membrane protein, palmitoylated 7 (MAGUK p55 subfamily member 7)	-0.626081	7.92025e-05	582	768	462	436
FAM43A	protein-coding	chr3:194685893-194689037	+	hsa:131583	family with sequence similarity 43, member A	0.801281	0.00024139	153	224	325	347
SYNE3	protein-coding	chr14:95448350-95516693	-	hsa:161176	spectrin repeat containing, nuclear envelope family member 3	1.34635	4.14476e-08	110	138	279	373
YJEFN3	protein-coding	chr19:19531910-19537584	+	hsa:374887	YjeF N-terminal domain containing 3	-0.824808	0.0422845	72	119	63	46
MIER2	protein-coding	chr19:305573-344415	-	hsa:54531	mesoderm induction early response 1, family member 2	0.599798	1.21736e-05	659	751	1113	1100
FAM86FP	pseudo	chr12:8231049-8242946	-	hsa:653113	family with sequence similarity 86, member A pseudogene	1.52722	0.0326012	8	17	27	46
B4GALT6	protein-coding	chr18:31622246-31685691	-	hsa:9331	UDP-Gal:betaGlcNAc beta 1,4- galactosyltransferase, polypeptide 6	-0.937472	0.000222102	225	259	124	138
TNRC18	protein-coding	chr7:5306790-5426043	-	hsa:84629	trinucleotide repeat containing 18	0.819608	4.96556e-11	1544	2026	3560	2895
ZBED2	protein-coding	chr3:111592900-111595335	-	hsa:79413	zinc finger, BED-type containing 2	0.808603	0.000443614	137	192	281	310
SLC7A5P2	pseudo	chr16:21517893-21520444	-	hsa:387254	solute carrier family 7 (amino acid transporter light chain, L system), member 5 pseudogene 2	0.760715	0.000410011	165	222	318	356
SH3BP4	protein-coding	chr2:234994840-235055648	+	hsa:23677	SH3-domain binding protein 4	0.916611	0.034264	33	50	78	82
SH3D21	protein-coding	chr1:36307107-36321347	+	hsa:79729	SH3 domain containing 21	1.26355	0.00212875	30	58	92	122
NOTCH3	protein-coding	chr19:15159633-15200920	-	hsa:4854	notch 3	0.911782	1.06328e-05	314	404	827	555
NOTCH1	protein-coding	chr9:136494777-136544057	-	hsa:4851	notch 1	0.785329	1.24432e-06	757	751	1485	1223
SHROOM1	protein-coding	chr5:132822141-132827405	-	hsa:134549	shroom family member 1	0.971101	2.38786e-06	294	260	527	616
ESRP1	protein-coding	chr8:94641136-94707466	+	hsa:54845	epithelial splicing regulatory protein 1	-0.677953	5.15143e-10	2348	2750	1675	1621
HIGD2B	pseudo	chr15:72675782-72686149	-	hsa:123346	HIG1 hypoxia inducible domain family, member 2B	-1.86004	0.0206966	24	36	5	12
ZXDA	protein-coding	chrx:57905430-57910633	-	hsa:7789	zinc finger, X-linked, duplicated A	-0.749135	0.0314295	96	137	67	75
MRC2	protein-coding	chr17:62627670-62692467	+	hsa:9902	mannose receptor, C type 2	2.24394	4.22953e-25	151	124	680	689
MREG	protein-coding	chr2:215939097-216013473	-	hsa:55686	melanoregulin	-0.676006	0.000764197	339	503	285	252
SEPT14P4	ncRNA					-5.23743	0.0213069	4	10	0	0
GSDMD	protein-coding	chr8:143553387-143563062	+	hsa:79792	gasdermin D	-1.61988	0.0284974	70	18	17	15
MKRN2OS	protein-coding	chr3:12539713-12561227	-	hsa:100129480	MKRN2 opposite strand	-5.37797	0.0144346	6	9	0	0
MT1F	protein-coding	chr16:56657943-56659303	+	hsa:4494	metallothionein 1F	0.764905	0.0476295	65	63	134	92
AGPAT4	protein-coding	chr6:161129980-161274108	-	hsa:56895	1-acylglycerol-3-phosphate O-acyltransferase 4	-0.603561	0.0168059	219	241	162	152
IFI6	protein-coding	chr1:27666061-27672213	-	hsa:2537	interferon, alpha-inducible protein 6	1.00486	8.0379e-06	134	188	310	353
COL7A1	protein-coding	chr3:48571970-48595302	-	hsa:1294	collagen, type VII, alpha 1	1.40418	0.0244246	15	17	37	51
MRAP2	protein-coding	chr6:84032621-84090887	+	hsa:112609	melanocortin 2 receptor accessory protein 2	1.04719	0.00011734	96	137	205	290
APBB1	protein-coding	chr11:6395125-6419087	-	hsa:322	amyloid beta (A4) precursor protein-binding, family B, member 1 (Fe65)	0.66577	1.7682e-05	401	482	693	755
EFNB2	protein-coding	chr13:106489745-106527279	-	hsa:1948	ephrin-B2	-1.09375	2.86078e-12	711	910	405	376
EFNA5	protein-coding	chr5:107376889-107670895	-	hsa:1946	ephrin-A5	2.99807	6.29086e-23	30	42	276	315
EFNA2	protein-coding	chr19:1286154-1301431	+	hsa:1943	ephrin-A2	0.754142	0.000420303	183	240	389	343
DYSF	protein-coding	chr2:71466702-71686763	+	hsa:8291	dysferlin	1.68092	0.000393688	15	51	99	110
GATA2	protein-coding	chr3:128479422-128487921	-	hsa:2624	GATA binding protein 2	1.11405	2.02976e-09	206	310	585	554
MSLN	protein-coding	chr16:760767-768865	+	hsa:10232	mesothelin	0.993141	1.51437e-07	276	326	680	555
LAPTM4B	protein-coding	chr8:97775581-97852602	+	hsa:55353	lysosomal protein transmembrane 4 beta	-0.660994	4.1161e-13	10705	16143	8638	8654
COL6A3	protein-coding	chr2:237324018-237414164	-	hsa:1293	collagen, type VI, alpha 3	-2.96929	0.019937	14	16	1	3
COL6A2	protein-coding	chr21:46098119-46129805	+	hsa:1292	collagen, type VI, alpha 2	0.841587	2.84307e-10	1625	1542	2941	3010
COL6A1	protein-coding	chr21:45981749-46005049	+	hsa:1291	collagen, type VI, alpha 1	1.02572	1.0634e-25	1972	2375	4638	4499
LIMS2	protein-coding	chr2:127638421-127648253	-	hsa:55679	LIM and senescent cell antigen-like domains 2	2.67594	1.69184e-31	82	97	654	523
PDGFB	protein-coding	chr22:39223359-39245055	-	hsa:5155	platelet-derived growth factor beta polypeptide	0.869593	2.00849e-08	479	512	957	924
MSX2	protein-coding	chr5:174724495-174730598	+	hsa:4488	msh homeobox 2	0.848406	0.00144851	95	149	214	234
RBFOX2	protein-coding	chr22:35738736-35961908	-	hsa:23543	RNA binding protein, fox-1 homolog (C. elegans) 2	0.637772	0.0138894	139	266	360	272
CHCHD4	protein-coding	chr3:14112077-14124871	-	hsa:131474	coiled-coil-helix-coiled-coil-helix domain containing 4	-0.611615	0.000626145	479	562	366	338
RAD51L3-RFFL	ncRNA	chr17:35009112-35121522	-	hsa:100529207	RAD51L3-RFFL readthrough	-0.603085	7.67145e-06	1069	1719	903	962
PCDHAC2	protein-coding	chr5:140966162-141012344	+	hsa:56134	protocadherin alpha subfamily C, 2	0.617865	0.0232881	105	162	182	237
PHACTR2	protein-coding	chr6:143608180-143831185	+	hsa:9749	phosphatase and actin regulator 2	-1.78188	1.11515e-17	439	515	144	143
ST3GAL1	protein-coding	chr8:133454848-133572454	-	hsa:6482	ST3 beta-galactoside alpha-2,3-sialyltransferase 1	-0.733509	1.25966e-06	899	1062	529	695
ST3GAL2	protein-coding	chr16:70379435-70439088	-	hsa:6483	ST3 beta-galactoside alpha-2,3-sialyltransferase 2	1.02956	2.83769e-13	431	537	969	1070
LIMD2	protein-coding	chr17:63697806-63700000	-	hsa:80774	LIM domain containing 2	0.908385	0.000860427	112	128	256	209
PRKRIP1	protein-coding	chr7:102396357-102426682	+	hsa:79706	PRKR interacting protein 1 (IL11 inducible)	0.756212	0.0290595	81	70	131	137
SH3BGR	protein-coding	chr21:39445871-39515506	+	hsa:6450	SH3 domain binding glutamate-rich protein	4.83138	0.0494662	0	0	3	8
FBLIM1	protein-coding	chr1:15758758-15775031	+	hsa:54751	filamin binding LIM protein 1	0.915579	0.00347075	85	85	151	184
MTX2	protein-coding	chr2:176269395-176338025	+	hsa:10651	metaxin 2	-0.661188	0.00461018	287	294	191	192
LRFN3	protein-coding	chr19:35937120-35945195	+	hsa:79414	leucine rich repeat and fibronectin type III domain containing 3	0.593536	0.000738015	326	461	651	562
LBX2-AS1	ncRNA	chr2:74502617-74505065	+	hsa:151534	LBX2 antisense RNA 1	1.3217	0.00484662	31	32	95	68
CELSR2	protein-coding	chr1:109250019-109275756	+	hsa:1952	cadherin, EGF LAG seven-pass G-type receptor 2	0.752617	4.27126e-06	808	817	1594	1254
CELSR1	protein-coding	chr22:46360834-46537170	-	hsa:9620	cadherin, EGF LAG seven-pass G-type receptor 1	0.74035	6.27752e-06	594	639	1179	956
RBP1	protein-coding	chr3:139526405-139539829	-	hsa:5947	retinol binding protein 1, cellular	-0.865265	6.56731e-15	1750	2200	1118	1116
SLC39A13	protein-coding	chr11:47408495-47416500	+	hsa:91252	solute carrier family 39 (zinc transporter), member 13	0.587536	0.00157634	345	349	547	540
SGMS1-AS1	lncRNA	chr10:50624951-50631636	+		SGMS1 antisense RNA 1	1.80797	0.0238087	6	11	36	24
COX18	protein-coding	chr4:73054696-73069759	-	hsa:285521	COX18 cytochrome C oxidase assembly factor	-0.73278	0.00314766	234	475	225	202
LOC105371620	lncRNA	chr1:174022473-174022985	+		uncharacterized LOC105371620	2.15363	0.0214853	6	4	23	24
HAR1B	ncRNA	chr20:63095493-63102319	-	hsa:768097	highly accelerated region 1B (non-protein coding)	5.26165	0.025175	0	0	1	14
CCNB1IP1	protein-coding	chr14:20311368-20333312	-	hsa:57820	cyclin B1 interacting protein 1, E3 ubiquitin protein ligase	-0.639457	1.2804e-06	997	1353	703	848
PLA2R1	protein-coding	chr2:159976162-160062902	-	hsa:22925	phospholipase A2 receptor 1, 180kDa	-3.75956	0.0160593	14	12	2	0
RUNX1	protein-coding	chr21:34821276-35049334	-	hsa:861	runt-related transcription factor 1	1.16289	6.23562e-16	429	536	1152	1072
ULBP1	protein-coding	chr6:149963974-149973713	+	hsa:80329	UL16 binding protein 1	0.671593	0.0292611	78	116	168	147
LRIG1	protein-coding	chr3:66378797-66499978	-	hsa:26018	leucine-rich repeats and immunoglobulin-like domains 1	-1.15069	0.0394639	35	111	21	44
SYTL2	protein-coding	chr11:85694275-85720840	-	hsa:54843	synaptotagmin-like 2	1.17915	0.000725773	55	63	146	130
IL32	protein-coding	chr16:3065611-3069667	+	hsa:9235	interleukin 32	1.32376	8.02931e-09	122	179	332	441
CAMTA2	protein-coding	chr17:4967993-4986213	-	hsa:23125	calmodulin binding transcription activator 2	0.780686	0.000373307	189	216	383	336
ATOX1	protein-coding	chr5:151742822-151758649	-	hsa:475	antioxidant 1 copper chaperone	0.689885	9.52861e-06	464	504	783	840
KRT18	protein-coding	chr12:52949059-52952901	+	hsa:3875	keratin 18, type I	0.584561	4.5376e-10	47916	53277	72025	86030
KRT13	protein-coding	chr17:41500981-41505613	-	hsa:3860	keratin 13, type I	1.79566	0.00910588	12	10	41	39
LOC105371450	lncRNA	chr1:155196035-155200571	+		uncharacterized LOC105371450	0.923287	0.000921675	99	112	213	201
LOC105371441	lncRNA	chr1:151987230-152010601	+		uncharacterized LOC105371441	1.48749	7.34491e-07	68	107	193	310
MXD3	protein-coding	chr5:177307205-177312291	-	hsa:83463	MAX dimerization protein 3	0.582514	0.000202171	425	598	698	875
HARS2	protein-coding	chr5:140691426-140699318	+	hsa:23438	histidyl-tRNA synthetase 2, mitochondrial	-0.607977	7.93352e-06	832	1073	639	647
FOXP4-AS1	lncRNA	chr6:41523895-41548621	-	hsa:101060264	FOXP4 antisense RNA 1	-1.31161	0.0444231	36	38	16	15
MXI1	protein-coding	chr10:110210231-110287365	+	hsa:4601	MAX interactor 1, dimerization protein	-1.35089	0.00246005	73	90	31	35
VKORC1L1	protein-coding	chr7:65873270-65959563	+	hsa:154807	vitamin K epoxide reductase complex, subunit 1-like 1	2.36751	0.0393142	4	2	16	17
EIF2AK4	protein-coding	chr15:39934101-40035596	+	hsa:440275	eukaryotic translation initiation factor 2 alpha kinase 4	-0.99042	0.0145132	90	93	47	49
SEMA7A	protein-coding	chr15:74409284-74433959	-	hsa:8482	semaphorin 7A, GPI membrane anchor (John Milton Hagen blood group)	1.31083	1.14345e-10	166	191	441	476
SEMA6B	protein-coding	chr19:4542588-4581484	-	hsa:10501	sema domain, transmembrane domain (TM), and cytoplasmic domain, (semaphorin) 6B	0.969531	1.38517e-15	1378	1907	3575	2997
SEMA4G	protein-coding	chr10:100969503-100985618	+	hsa:57715	sema domain, immunoglobulin domain (Ig), transmembrane domain (TM) and short cytoplasmic domain, (semaphorin) 4G	0.841167	0.0338777	40	68	104	92
SEMA3C	protein-coding	chr7:80742538-80919184	-	hsa:10512	sema domain, immunoglobulin domain (Ig), short basic domain, secreted, (semaphorin) 3C	-1.11561	6.96442e-06	264	326	116	166
SEMA3B	protein-coding	chr3:50273119-50277171	+	hsa:7869	sema domain, immunoglobulin domain (Ig), short basic domain, secreted, (semaphorin) 3B	2.08801	1.99988e-05	12	33	94	97
SEMA3A	protein-coding	chr7:83956846-84316813	-	hsa:10371	sema domain, immunoglobulin domain (Ig), short basic domain, secreted, (semaphorin) 3A	2.76036	7.28243e-54	118	176	907	1136
MORF4L2-AS1	ncRNA	chrx:103687284-103692560	+	hsa:340544	MORF4L2 antisense RNA 1	-2.5713	0.0229158	13	22	2	4
IL17RB	protein-coding	chr3:53846494-53866526	+	hsa:55540	interleukin 17 receptor B	0.713527	0.00188232	146	249	303	355
IL17RA	protein-coding	chr22:17084959-17115694	+	hsa:23765	interleukin 17 receptor A	0.936948	0.0125151	44	68	102	117
IL17RD	protein-coding	chr3:57089982-57142486	-	hsa:54756	interleukin 17 receptor D	0.93707	2.05733e-12	630	967	1603	1509
COL9A3	protein-coding	chr20:62817062-62841159	+	hsa:1299	collagen, type IX, alpha 3	1.46473	7.50288e-12	208	204	657	526
MYL9	protein-coding	chr20:36541484-36549823	+	hsa:10398	myosin, light chain 9, regulatory	1.03851	4.55553e-16	681	982	1570	1932
CUEDC1	protein-coding	chr17:57861598-57955292	-	hsa:404093	CUE domain containing 1	0.973288	3.89002e-20	1281	1501	2694	2963
MYLK	protein-coding	chr3:123614023-123793844	-	hsa:4638	myosin light chain kinase	1.49399	0.00123007	27	30	88	78
THAP7	protein-coding	chr22:20999772-21002115	-	hsa:80764	THAP domain containing 7	0.713527	4.49347e-08	623	755	1135	1199
LOC107987072	lncRNA					-0.716717	0.0018844	303	388	172	263
LOC105375674	lncRNA	chr8:101121812-101126630	-		uncharacterized LOC105375674	2.22086	0.0116446	3	9	24	32
MINK1	protein-coding	chr17:4833340-4898061	+	hsa:50488	misshapen-like kinase 1	0.699063	0.00743439	149	140	241	250
MYRF	protein-coding	chr11:61752649-61788518	+	hsa:745	myelin regulatory factor	1.52293	0.0383558	6	23	55	26
FSTL3	protein-coding	chr19:676389-683392	+	hsa:10272	follistatin-like 3 (secreted glycoprotein)	1.03313	1.25337e-13	464	599	1145	1091
VWA5B2	protein-coding	chr3:184229593-184242329	+	hsa:90113	von Willebrand factor A domain containing 5B2	1.0645	0.00424539	52	76	166	106
ACBD7	protein-coding	chr10:15075475-15088776	-	hsa:414149	acyl-CoA binding domain containing 7	0.757391	0.000590607	185	375	443	509
FLYWCH1	protein-coding	chr16:2911876-2949812	+	hsa:84256	FLYWCH-type zinc finger 1	0.636928	0.0105242	125	176	245	234
MIR5087	ncRNA	chr1:148334522-148334544	-	hsa:100847044	microRNA 5087	0.672364	0.0169502	97	130	193	178
RGP1	protein-coding	chr9:35749280-35753267	+	hsa:9827	RGP1 retrograde golgi transport homolog (S. cerevisiae)	0.597162	7.22246e-05	542	633	965	871
MIR5001	ncRNA	chr2:232550493-232550514	-	hsa:100847037	microRNA 5001	5.38519	0.0131147	0	0	7	9
CCDC97	protein-coding	chr19:41309855-41321016	+	hsa:90324	coiled-coil domain containing 97	0.590767	6.23156e-05	568	618	907	949
RGS2	protein-coding	chr1:192809039-192812277	+	hsa:5997	regulator of G-protein signaling 2	0.734592	0.000278532	210	299	463	402
VSIG10	protein-coding	chr12:118063593-118104402	-	hsa:54621	V-set and immunoglobulin domain containing 10	-1.01029	4.32103e-12	785	1122	486	482
CPAMD8	protein-coding	chr19:16892951-17026818	-	hsa:27151	C3 and PZP-like, alpha-2-macroglobulin domain containing 8	5.5733	0.00821446	0	0	12	6
INF2	protein-coding	chr14:104689606-104704809	+	hsa:64423	inverted formin, FH2 and WH2 domain containing	0.843977	1.6953e-15	1186	1486	2482	2459
RNF141	protein-coding	chr11:10511678-10541227	-	hsa:50862	ring finger protein 141	-0.670129	1.75273e-11	2246	3014	1630	1766
LOC105375568	lncRNA	chr7:151025285-151028267	-		uncharacterized LOC105375568	3.831	0.0106163	2	0	14	17
RNF152	protein-coding	chr18:61808067-61894420	-	hsa:220441	ring finger protein 152	-2.16232	0.00251949	34	44	7	11
RNF157	protein-coding	chr17:76145299-76240368	-	hsa:114804	ring finger protein 157	0.980298	0.0441429	32	33	55	79
GALNT18	protein-coding	chr11:11270874-11622045	-	hsa:374378	polypeptide N-acetylgalactosaminyltransferase 18	-0.630515	0.0233699	185	192	119	135
GALNT14	protein-coding	chr2:30898690-31079169	-	hsa:79623	polypeptide N-acetylgalactosaminyltransferase 14	-2.60327	6.41389e-15	210	265	28	53
ADGRV1	protein-coding	chr5:90558681-91164223	+	hsa:84059	G protein-coupled receptor 98	-1.61388	0.0122573	33	54	11	18
LOC107987142	protein-coding					1.94235	0.0370803	11	2	33	22
RPS20P14	pseudo	chr3:186900073-186900622	+		ribosomal protein S20 pseudogene 14	-0.593258	0.00260067	344	559	278	331
ACAA2	protein-coding	chr18:49783504-49813881	-	hsa:10449	acetyl-CoA acyltransferase 2	-0.771648	9.05239e-05	345	456	241	241
CCDC61	protein-coding	chr19:45997909-46018616	+	hsa:729440	coiled-coil domain containing 61	0.718517	0.00246487	134	187	273	268
CCDC58	protein-coding	chr3:122359879-122383231	-	hsa:131076	coiled-coil domain containing 58	-0.678417	0.0056116	214	295	142	185
SCYL3	protein-coding	chr1:169853089-169893959	-	hsa:57147	SCY1-like 3 (S. cerevisiae)	-1.05979	0.00098109	141	173	65	91
RPL34P25	pseudo	chr12:19508855-19509291	+		ribosomal protein L34 pseudogene 25	-5.00194	0.0370134	3	9	0	0
SLC2A1-AS1	ncRNA	chr1:42959049-42983358	+	hsa:440584	SLC2A1 antisense RNA 1	1.00549	0.0333065	40	32	63	90
ADGRF1	protein-coding	chr6:46997708-47027761	-	hsa:266977	G protein-coupled receptor 110	-2.21369	2.27611e-58	1297	1655	332	323
RHOC	protein-coding	chr1:112701127-112707056	-	hsa:389	ras homolog family member C	0.64704	5.97556e-10	4672	5042	7260	8606
PCDHGA8	protein-coding	chr5:141355025-141512979	+	hsa:9708	protocadherin gamma subfamily A, 8	1.56299	0.045952	7	12	29	28
RNF208	protein-coding	chr9:137220247-137221323	-	hsa:727800	ring finger protein 208	0.586588	0.0259901	168	181	317	225
SHFM1	protein-coding	chr7:96688767-96709891	-	hsa:7979	split hand/foot malformation (ectrodactyly) type 1	-0.612329	0.00441377	281	443	254	227
EBPL	protein-coding	chr13:49660676-49691487	-	hsa:84650	emopamil binding protein-like	-0.649914	2.82618e-05	591	840	466	467
ADGRA2	protein-coding	chr8:37796883-37843986	+	hsa:25960	G protein-coupled receptor 124	0.932901	1.90786e-06	194	258	447	439
CNTNAP3B	protein-coding	chr9:41891887-42129504	-	hsa:728577	contactin associated protein-like 3B	0.884314	0.0128454	64	87	105	183
FLJ37453	ncRNA	chr1:15834215-15848147	-	hsa:729614	uncharacterized LOC729614	1.30875	0.00579086	21	50	102	73
ADGRB2	protein-coding	chr1:31727105-31757643	-	hsa:576	brain-specific angiogenesis inhibitor 2	0.692667	0.00108555	195	224	347	354
HIST1H3PS1	pseudo	chr6:26321876-26322292	-		histone cluster 1, H3, pseudogene 1	2.91592	0.010688	4	1	16	25
FGFRL1	protein-coding	chr4:1011972-1026898	+	hsa:53834	fibroblast growth factor receptor-like 1	0.621305	2.08852e-11	2509	3064	4414	4434
LOC107987281	lncRNA					6.43336	0.000431734	0	0	16	17
MARVELD3	protein-coding	chr16:71626153-71636205	+	hsa:91862	MARVEL domain containing 3	-0.999413	0.0223968	57	155	47	58
SH3BGRL3	protein-coding	chr1:26279722-26281522	+	hsa:83442	SH3 domain binding glutamate-rich protein like 3	0.832625	1.29387e-16	2659	3939	5468	6548
SH3BGRL2	protein-coding	chr6:79631105-79703670	+	hsa:83699	SH3 domain binding glutamate-rich protein like 2	-1.69625	6.56144e-09	194	259	61	83
RHPN1	protein-coding	chr8:143368828-143384220	+	hsa:114822	rhophilin, Rho GTPase binding protein 1	0.617605	0.018733	119	183	259	212
ECH1	protein-coding	chr19:38815422-38831857	-	hsa:1891	enoyl CoA hydratase 1, peroxisomal	2.62769	8.97818e-09	17	30	94	204
RINL	protein-coding	chr19:38867829-38878273	-	hsa:126432	Ras and Rab interactor-like	-2.12731	0.0265985	21	21	6	4
ECM1	protein-coding	chr1:150508011-150513789	+	hsa:1893	extracellular matrix protein 1	1.15268	0.000635377	65	64	148	151
MECOM	protein-coding	chr3:169083506-169146568	-	hsa:2122	MDS1 and EVI1 complex locus	1.19623	0.0323298	20	23	49	53
NAP1L5	protein-coding	chr4:88695913-88698235	-	hsa:266812	nucleosome assembly protein 1-like 5	1.66205	0.0491784	5	11	24	27
MIPEP	protein-coding	chr13:23730189-23889448	-	hsa:4285	mitochondrial intermediate peptidase	-1.32236	0.0040351	61	109	27	42
ANGPTL4	protein-coding	chr19:8364127-8374375	+	hsa:51129	angiopoietin-like 4	-0.796089	0.00111743	252	277	164	152
EEF1A2	protein-coding	chr20:63488012-63499315	-	hsa:1917	eukaryotic translation elongation factor 1 alpha 2	0.611968	1.09843e-10	11151	12075	17648	19334
EEF1E1	protein-coding	chr6:8073360-8102595	-	hsa:9521	eukaryotic translation elongation factor 1 epsilon 1	-0.813933	0.00017053	279	393	181	211
SNORD58B	snoRNA	chr18:49491664-49491729	-	hsa:26790	small nucleolar RNA, C/D box 58B	-0.586423	2.43848e-05	898	1396	729	828
THBS1	protein-coding	chr15:39581083-39597467	+	hsa:7057	thrombospondin 1	0.635312	2.69593e-05	433	538	787	767
CD99L2	protein-coding	chrx:150766336-150898816	-	hsa:83692	CD99 molecule-like 2	0.762509	0.00203361	183	237	273	465
MED30	protein-coding	chr8:117520546-117536399	+	hsa:90390	mediator complex subunit 30	-0.608698	0.0371695	146	174	105	112
LOC105375260	lncRNA	chr7:44821994-44825929	+		uncharacterized LOC105375260	-3.05678	0.0414362	10	14	0	3
ARID5B	protein-coding	chr10:62049211-62096948	+	hsa:84159	AT rich interactive domain 5B (MRF1-like)	0.614914	0.00197629	229	304	444	393
VWDE	protein-coding	chr7:12330885-12403903	-	hsa:221806	von Willebrand factor D and EGF domains	-1.09676	0.00015236	163	268	112	92
MED26	protein-coding	chr19:16574907-16628204	-	hsa:9441	mediator complex subunit 26	0.651636	0.000537967	295	319	513	488
LOC105375237	lncRNA	chr7:39513311-39522502	-		uncharacterized LOC105375237	-5.08119	0.0335074	2	11	0	0
SHARPIN	protein-coding	chr8:144098637-144104265	-	hsa:81858	SHANK-associated RH domain interactor	0.598299	1.60049e-05	534	678	945	944
APLP1	protein-coding	chr19:35868445-35879795	+	hsa:333	amyloid beta (A4) precursor-like protein 1	1.03377	8.73994e-10	563	509	1070	1239
ALOX12P2	pseudo	chr17:6893777-6900349	+	hsa:245	arachidonate 12-lipoxygenase pseudogene 2	0.590657	0.0269174	120	156	183	246
KREMEN2	protein-coding	chr16:2964216-2968383	+	hsa:79412	kringle containing transmembrane protein 2	0.620265	0.0117149	131	207	279	249
VPS18	protein-coding	chr15:40898710-40903975	+	hsa:57617	vacuolar protein sorting 18 homolog (S. cerevisiae)	0.671182	3.74144e-08	882	1024	1564	1577
COL4A5	protein-coding	chrx:108439844-108697545	+	hsa:1287	collagen, type IV, alpha 5	-0.720728	0.0246583	131	160	75	108
COL4A3	protein-coding	chr2:227164565-227314792	+	hsa:1285	collagen, type IV, alpha 3 (Goodpasture antigen)	-1.40682	0.0258814	33	50	14	18
A2M	protein-coding	chr12:9067708-9115940	-	hsa:2	alpha-2-macroglobulin	3.35803	0.0132944	3	0	14	20
IRF9	protein-coding	chr14:24161213-24166565	+	hsa:10379	interferon regulatory factor 9	0.692602	0.00160122	288	255	407	518
ZNF512B	protein-coding	chr20:63956704-63969870	-	hsa:57473	zinc finger protein 512B	0.798482	4.40489e-05	269	295	543	473
FOLR1	protein-coding	chr11:72189915-72196323	+	hsa:2348	folate receptor 1 (adult)	0.873598	0.00284027	79	111	170	187
C17orf75	protein-coding	chr17:32328441-32342209	-	hsa:64149	chromosome 17 open reading frame 75	-0.688103	0.00716373	199	245	147	137
MIS12	protein-coding	chr17:5486893-5490811	+	hsa:79003	MIS12 kinetochore complex component	-0.608059	0.00225442	319	438	257	252
C17orf82	protein-coding	chr17:61411751-61413280	+	hsa:388407	chromosome 17 open reading frame 82	4.97512	0.0351319	0	0	6	6
IRS1	protein-coding	chr2:226731317-226798790	-	hsa:3667	insulin receptor substrate 1	-0.595061	7.74441e-08	1674	2180	1332	1290
IRS2	protein-coding	chr13:109753837-109786567	-	hsa:8660	insulin receptor substrate 2	0.643218	0.0123323	149	207	332	235
EFL1	protein-coding	chr15:82130220-82262763	-	hsa:1942	ephrin-A1	-0.611055	0.032288	151	204	129	109
LOC100128494	ncRNA	chr11:72014291-72020910	+	hsa:100128494	uncharacterized LOC100128494	5.20318	0.0209223	0	0	8	6
FLT3LG	protein-coding	chr19:49474209-49486231	+	hsa:2323	fms-related tyrosine kinase 3 ligand	0.990456	0.0488422	24	38	71	54
MEF2C	protein-coding	chr5:88720282-88889324	-	hsa:4208	myocyte enhancer factor 2C	-1.57866	5.29583e-05	104	128	43	37
BGLAP	protein-coding	chr1:156241962-156243332	+	hsa:632	bone gamma-carboxyglutamate (gla) protein	1.97301	0.0149325	10	5	31	32
P4HA1	protein-coding	chr10:73007217-73096974	-	hsa:5033	prolyl 4-hydroxylase, alpha polypeptide I	-0.944072	2.07575e-10	813	1215	556	518
NINJ1	protein-coding	chr9:93121496-93134304	-	hsa:4814	ninjurin 1	0.594628	8.89157e-07	757	977	1299	1397
ABR	protein-coding	chr17:1003561-1109100	-	hsa:29	active BCR-related	4.68662	0.000617438	0	2	32	19
ACE	protein-coding	chr17:63484607-63497618	+	hsa:1636	angiotensin I converting enzyme	1.3606	3.45737e-05	57	65	164	160
ACD	protein-coding	chr16:67657529-67660815	-	hsa:65057	adrenocortical dysplasia homolog (mouse)	0.596668	3.51088e-07	892	1121	1476	1665
SNORD83A	snoRNA	chr22:39315213-39315307	-	hsa:116937	small nucleolar RNA, C/D box 83A	0.697491	0.0430242	96	90	116	202
RNF225	protein-coding	chr19:58395081-58398954	+	hsa:646862	ring finger protein 225	1.48111	0.0254523	17	11	41	42
GSTM4	protein-coding	chr1:109656084-109661705	+	hsa:2948	glutathione S-transferase mu 4	0.75255	8.8744e-06	300	461	609	700
EGR3	protein-coding	chr8:22687661-22692580	-	hsa:1960	early growth response 3	1.7424	2.78895e-06	30	55	145	143
ARC	protein-coding	chr8:142611044-142614472	-	hsa:23237	activity-regulated cytoskeleton-associated protein	1.23517	1.19282e-13	347	359	805	928
APOOL	protein-coding	chrx:85003892-85093317	+	hsa:139322	apolipoprotein O-like	-0.707083	3.01998e-05	590	726	446	384
MITD1	protein-coding	chr2:99161427-99181035	-	hsa:129531	MIT, microtubule interacting and transport, domain containing 1	-0.939798	0.0489089	53	88	28	47
IL13RA1	protein-coding	chrx:118727440-118794533	+	hsa:3597	interleukin 13 receptor, alpha 1	-0.632913	0.00529027	264	353	174	236
ITCH	protein-coding	chr20:34363235-34511773	+	hsa:83737	itchy E3 ubiquitin protein ligase	0.790557	0.0333765	68	66	139	102
APOL2	protein-coding	chr22:36226209-36239533	-	hsa:23780	apolipoprotein L, 2	0.713593	0.00234604	137	200	261	305
AXL	protein-coding	chr19:41226755-41261767	+	hsa:558	AXL receptor tyrosine kinase	-2.2058	1.3332e-35	1198	1320	224	346
NAV3	protein-coding	chr12:77827288-78213010	+	hsa:89795	neuron navigator 3	-1.34692	1.69579e-12	548	595	213	255
CADPS2	protein-coding	chr7:122319324-122886460	-	hsa:93664	Ca++-dependent secretion activator 2	-0.611943	0.0341894	138	255	135	124
BAD	protein-coding	chr11:64269828-64284704	-	hsa:572	BCL2-associated agonist of cell death	0.617165	1.26072e-06	726	1042	1276	1503
BAX	protein-coding	chr19:48954860-48961798	+	hsa:581	BCL2-associated X protein	0.6384	1.97591e-05	582	613	938	999
EHD2	protein-coding	chr19:47713344-47743134	+	hsa:30846	EH-domain containing 2	1.43791	1.11277e-39	1640	2106	5570	4851
C10orf54	protein-coding	chr10:71747556-71773580	-	hsa:64115	chromosome 10 open reading frame 54	0.897223	4.64783e-10	660	680	1301	1299
EHD1	protein-coding	chr11:64852727-64878768	-	hsa:10938	EH-domain containing 1	0.791222	6.63305e-12	1275	1402	2304	2512
MEGF8	protein-coding	chr19:42325609-42378769	+	hsa:1954	multiple EGF-like-domains 8	0.580714	0.0460388	134	136	244	175
SUSD2	protein-coding	chr22:24181476-24189106	+	hsa:56241	sushi domain containing 2	4.30035	7.32787e-177	111	130	2237	2672
CSRNP3	protein-coding	chr2:165469647-165689407	+	hsa:80034	cysteine-serine-rich nuclear protein 3	-4.50428	0.0205307	14	7	1	0
BIN3-IT1	ncRNA	chr8:22640371-22642209	-	hsa:80094	BIN3 intronic transcript 1 (non-protein coding)	2.44854	0.030131	3	3	17	17
SNORD141B	snoRNA					-1.20973	0.0177961	52	67	25	28
SNORD141A	snoRNA					-0.641039	9.27716e-06	719	906	525	549
LEMD1	protein-coding	chr1:205381378-205422086	-	hsa:93273	LEM domain containing 1	-1.83818	4.36592e-05	87	140	43	21
TMEM65	protein-coding	chr8:124306189-124372693	-	hsa:157378	transmembrane protein 65	-0.670947	0.011033	179	226	131	131
RDH10	protein-coding	chr8:73294602-73325285	+	hsa:157506	retinol dehydrogenase 10 (all-trans)	-0.596323	0.00051259	494	710	429	384
RDH16	protein-coding	chr12:56951431-56959374	-	hsa:8608	retinol dehydrogenase 16 (all-trans)	-3.30182	0.046124	9	10	1	1
TMEM91	protein-coding	chr19:41376533-41384083	+	hsa:641649	transmembrane protein 91	-1.32722	0.0323177	30	78	13	30
IL2RB	protein-coding	chr22:37125838-37149922	-	hsa:3560	interleukin 2 receptor, beta	-4.34759	0.02829	12	7	1	0
CIC	protein-coding	chr19:42269282-42293641	+	hsa:23152	capicua transcriptional repressor	1.07128	0.000903955	844	845	2131	1563
TBC1D10B	protein-coding	chr16:30357101-30370201	-	hsa:26000	TBC1 domain family, member 10B	0.62516	1.55454e-10	1603	2211	2917	3116
CPM	protein-coding	chr12:68842200-68933171	-	hsa:1368	carboxypeptidase M	-0.649222	0.0182622	167	285	162	129
HSPH1	protein-coding	chr13:31134974-31162388	-	hsa:10808	heat shock 105kDa/110kDa protein 1	-0.619203	1.20699e-07	2103	2298	1465	1514
CR2	protein-coding	chr1:207454300-207489895	+	hsa:1380	complement component (3d/Epstein Barr virus) receptor 2	-2.75726	8.246e-07	78	78	15	9
ALDH2	protein-coding	chr12:111766887-111809985	+	hsa:217	aldehyde dehydrogenase 2 family (mitochondrial)	-0.612609	0.00840267	224	307	179	177
RNU5F-1	snRNA	chr1:44721786-44721901	-	hsa:26828	RNA, U5F small nuclear 1	1.48982	3.06284e-13	176	238	492	707
CSNK2A3	protein-coding	chr11:11351942-11353357	-	hsa:283106	casein kinase 2, alpha 3 polypeptide	-0.623976	5.62651e-05	611	899	506	494
HSPG2	protein-coding	chr1:21822232-21937297	-	hsa:3339	heparan sulfate proteoglycan 2	1.43476	6.31324e-05	724	868	2691	1728
CSK	protein-coding	chr15:74782064-74803197	+	hsa:1445	c-src tyrosine kinase	0.808265	0.000891137	143	175	312	261
CPEB4	protein-coding	chr5:173888328-173960991	+	hsa:80315	cytoplasmic polyadenylation element binding protein 4	-0.820899	0.00450897	178	221	134	98
PDIK1L	protein-coding	chr1:26109406-26125543	+	hsa:149420	PDLIM1 interacting kinase 1 like	-0.789781	0.00400922	219	215	138	124
TBKBP1	protein-coding	chr17:47694756-47712058	+	hsa:9755	TBK1 binding protein 1	0.758346	2.37998e-06	354	427	677	687
OR51B4	protein-coding	chr11:5301014-5301946	-	hsa:79339	olfactory receptor, family 51, subfamily B, member 4	-0.636729	0.0110219	197	281	167	147
OR51B6	protein-coding	chr11:5342514-5505652	-	hsa:390058	olfactory receptor, family 51, subfamily B, member 6	-0.779018	6.51011e-14	1982	2565	1332	1395
DES	protein-coding	chr2:219418377-219426739	+	hsa:1674	desmin	0.820492	0.00544734	82	112	183	168
IL1R2	protein-coding	chr2:101999170-102028423	+	hsa:7850	interleukin 1 receptor, type II	-4.88477	0.046726	3	8	0	0
RPL5	protein-coding	chr1:92832037-92841924	+	hsa:6125	ribosomal protein L5	-0.599216	2.39128e-10	9898	15243	8437	8441
TATDN3	protein-coding	chr1:212791833-212816639	+	hsa:128387	TatD DNase domain containing 3	-0.627785	0.00777301	214	339	181	183
VPS9D1	protein-coding	chr16:89707133-89721046	-	hsa:9605	VPS9 domain containing 1	0.662705	0.0484129	72	84	115	141
INS-IGF2	protein-coding	chr11:2129112-2161209	-	hsa:723961	INS-IGF2 readthrough	1.42216	1.25848e-09	152	140	421	397
MEIS3	protein-coding	chr19:47403124-47422315	-	hsa:56917	Meis homeobox 3	0.647948	0.000520157	279	481	543	666
NRIP1	protein-coding	chr21:14961235-15065903	-	hsa:8204	nuclear receptor interacting protein 1	-0.589729	0.00123737	462	542	307	385
DUT	protein-coding	chr15:48332168-48343373	+	hsa:1854	deoxyuridine triphosphatase	-0.870289	5.98449e-07	481	741	334	347
HSPE1	protein-coding	chr2:197499997-197503463	+	hsa:3336	heat shock 10kDa protein 1	-0.600229	9.19604e-08	1435	1864	1076	1164
HSPD1	protein-coding	chr2:197486584-197499916	-	hsa:3329	heat shock 60kDa protein 1 (chaperonin)	-0.663817	0.000297592	399	602	326	318
EXPH5	protein-coding	chr11:108505431-108593473	-	hsa:23086	exophilin 5	-0.725162	8.63057e-06	601	696	390	423
SLC30A1	protein-coding	chr1:211575039-211578757	-	hsa:7779	solute carrier family 30 (zinc transporter), member 1	-0.75026	0.00824809	194	216	144	108
IL1RN	protein-coding	chr2:113117893-113134016	+	hsa:3557	interleukin 1 receptor antagonist	-3.28984	0.00600501	14	25	3	1
SAMD4A	protein-coding	chr14:54567612-54793315	+	hsa:23034	sterile alpha motif domain containing 4A	1.15861	0.0145	34	33	60	97
EHF	protein-coding	chr11:34624260-34663288	+	hsa:26298	ets homologous factor	-2.9919	4.71653e-53	704	825	97	102
NEBL	protein-coding	chr10:20779973-20958159	-	hsa:10529	nebulette	1.45731	2.24759e-17	216	271	676	702
SAMD12	protein-coding	chr8:118324228-118621985	-	hsa:401474	sterile alpha motif domain containing 12	-1.94109	5.48977e-15	290	381	80	100
MIR4435-2HG	lncRNA	chr2:111195866-111495161	-	hsa:541471	MIR4435-1 host gene (non-protein coding)	0.78033	0.021523	56	98	133	135
NEK3	protein-coding	chr13:52132643-52159535	-	hsa:4752	NIMA-related kinase 3	-0.805409	0.00470558	189	258	156	105
MAPKBP1	protein-coding	chr15:41774470-41827855	+	hsa:23005	mitogen-activated protein kinase binding protein 1	0.666594	6.04167e-07	549	769	1041	1103
MELTF	protein-coding					0.954768	0.00061009	109	107	212	225
FBLN1	protein-coding	chr22:45502839-45563362	+	hsa:2192	fibulin 1	0.997813	7.42982e-16	677	806	1504	1557
FBLN5	protein-coding	chr14:91869411-91947691	-	hsa:10516	fibulin 5	1.05969	0.00175111	52	85	152	138
NEO1	protein-coding	chr15:73052484-73305206	+	hsa:4756	neogenin 1	-1.5826	1.32588e-08	242	307	111	77
RRAS	protein-coding	chr19:49635292-49640143	-	hsa:6237	related RAS viral (r-ras) oncogene homolog	0.584871	2.20358e-08	1549	1916	2476	2895
DGUOK-AS1	ncRNA	chr2:73957967-73981439	-	hsa:100874048	DGUOK antisense RNA 1	-2.68931	0.0297908	7	26	2	3
SLC31A1	protein-coding	chr9:113221528-113264492	+	hsa:1317	solute carrier family 31 (copper transporter), member 1	-0.895162	0.00971652	170	228	65	157
MUM1L1	protein-coding	chrx:106168305-106208956	+	hsa:139221	melanoma associated antigen (mutated) 1-like 1	-1.11213	0.0177879	62	76	30	36
KANSL2	protein-coding	chr12:48653211-48682252	-	hsa:54934	KAT8 regulatory NSL complex subunit 2	-0.63577	0.00812818	205	325	171	176
FN1	protein-coding	chr2:215360862-215436167	-	hsa:2335	fibronectin 1	0.820921	4.75811e-06	329	338	595	633
ELP2	protein-coding	chr18:36129899-36177931	+	hsa:55250	elongator acetyltransferase complex subunit 2	-0.597248	1.73787e-06	1069	1519	834	918
H19	ncRNA	chr11:1995176-2001466	-	hsa:283120	H19, imprinted maternally expressed transcript (non-protein coding)	4.95269	0.00748134	0	1	26	5
NFIC	protein-coding	chr19:3359650-3463044	+	hsa:4782	nuclear factor I/C (CCAAT-binding transcription factor)	0.583048	5.44079e-08	1845	2559	3537	3210
RASSF8-AS1	ncRNA	chr12:25954654-25959442	-	hsa:100506451	RASSF8 atnisense RNA 1	2.58374	0.0111808	4	3	22	22
PPP2R5B	protein-coding	chr11:64917553-64934478	+	hsa:5526	protein phosphatase 2, regulatory subunit B', beta	0.724563	0.000897045	286	245	450	474
ACKR2	protein-coding	chr3:42809472-42867283	+	hsa:1238	atypical chemokine receptor 2	3.24273	0.0228177	3	0	23	8
FYN	protein-coding	chr6:111660761-111759917	-	hsa:2534	FYN proto-oncogene, Src family tyrosine kinase	-0.734658	0.00561521	175	261	141	126
A4GALT	protein-coding	chr22:42692115-42720514	-	hsa:53947	alpha 1,4-galactosyltransferase	1.27533	1.63239e-18	520	537	1311	1354
GEM	protein-coding	chr8:94249249-94262345	-	hsa:2669	GTP binding protein overexpressed in skeletal muscle	0.63017	0.0114356	141	167	219	275
EML1	protein-coding	chr14:99737699-99941538	+	hsa:2009	echinoderm microtubule associated protein like 1	-0.880632	0.00204591	150	225	99	109
EML5	protein-coding	chr14:88680173-88792552	-	hsa:161436	echinoderm microtubule associated protein like 5	-1.83557	0.047882	28	15	7	6
EML4	protein-coding	chr2:42169338-42332548	+	hsa:27436	echinoderm microtubule associated protein like 4	-0.600365	0.00145038	383	482	269	320
C14orf80	protein-coding	chr14:105491249-105499248	+	hsa:283643	chromosome 14 open reading frame 80	0.60675	0.000119167	370	476	651	675
CCDC74A	protein-coding	chr2:131527747-131533666	+	hsa:90557	coiled-coil domain containing 74A	0.750112	0.035198	65	77	100	148
EMP3	protein-coding	chr19:48325372-48330553	+	hsa:2014	epithelial membrane protein 3	0.755865	1.62576e-10	981	1125	1749	1939
EMP1	protein-coding	chr12:13196668-13216774	+	hsa:2012	epithelial membrane protein 1	-0.704929	1.10206e-10	1716	2131	1185	1250
GNE	protein-coding	chr9:36214441-36277056	-	hsa:10020	glucosamine (UDP-N-acetyl)-2-epimerase/N-acetylmannosamine kinase	0.775781	3.13403e-06	402	703	993	918
NGFR	protein-coding	chr17:49495293-49515020	+	hsa:4804	nerve growth factor receptor	1.21922	3.2213e-06	113	135	338	256
LOC105377826	lncRNA	chr17:71518-86410	-		uncharacterized LOC105377826	4.83871	0.047408	0	0	4	7
GSR	protein-coding	chr8:30678061-30727969	-	hsa:2936	glutathione reductase	-0.803433	2.37743e-14	5072	7876	3875	3661
MRPS30	protein-coding	chr5:44808925-44815514	+	hsa:10884	mitochondrial ribosomal protein S30	-0.635086	7.348e-08	1358	1892	995	1152
KANK1	protein-coding	chr9:504695-745688	+	hsa:23189	KN motif and ankyrin repeat domains 1	1.70237	0.0271775	9	9	29	32
PRELID1P1	pseudo	chr6:126643460-126644398	+		PRELI domain containing 1 pseudogene 1	-4.66163	0.0144964	6	20	1	0
RTN2	protein-coding	chr19:45485288-45497055	-	hsa:6253	reticulon 2	0.612726	9.68274e-06	518	664	890	972
HK2	protein-coding	chr2:74834175-74893354	+	hsa:3099	hexokinase 2	-0.764984	5.92608e-10	1517	1767	1024	975
STEAP2	protein-coding	chr7:90211886-90237678	+	hsa:261729	STEAP family member 2, metalloreductase	-0.663034	0.00131918	319	454	218	283
STEAP1	protein-coding	chr7:90154375-90164827	+	hsa:26872	six transmembrane epithelial antigen of the prostate 1	-1.23676	2.02159e-06	213	327	125	108
CDKN2D	protein-coding	chr19:10566462-10568979	-	hsa:1032	cyclin-dependent kinase inhibitor 2D (p19, inhibits CDK4)	0.593917	0.00830174	165	217	305	287
LOC105377700	lncRNA	chr5:163089156-163413554	-		uncharacterized LOC105377700	-1.87661	0.0487804	13	31	4	8
PRAF2	protein-coding	chrx:49071156-49074045	-	hsa:11230	PRA1 domain family, member 2	1.06575	2.59054e-09	220	306	550	579
SMAD7	protein-coding	chr18:48919853-48949333	-	hsa:4092	SMAD family member 7	1.18422	0.0175082	23	34	73	59
SMAD6	protein-coding	chr15:66704088-66781993	+	hsa:4091	SMAD family member 6	1.39747	1.31324e-06	82	83	232	220
HYI	protein-coding	chr1:43451003-43453989	-	hsa:81888	hydroxypyruvate isomerase (putative)	1.09042	0.000537637	73	82	149	194
PDZD7	protein-coding	chr10:101007683-101031157	-	hsa:79955	PDZ domain containing 7	0.616191	0.0148041	135	158	238	226
BHLHE40	protein-coding	chr3:4979412-4985181	+	hsa:8553	basic helix-loop-helix family, member e40	-0.60645	3.8188e-09	1982	2587	1467	1622
LOC730102	pseudo	chr1:178006136-178038007	-	hsa:730102	quinone oxidoreductase-like protein 2 pseudogene	-0.760462	0.045984	75	131	62	61
ZDHHC6	protein-coding	chr10:112424411-112446947	-	hsa:64429	zinc finger, DHHC-type containing 6	-0.663553	1.09864e-05	834	1393	661	766
METTL7B	protein-coding	chr12:55681546-55684611	+	hsa:196410	methyltransferase like 7B	0.684405	0.00028077	244	414	515	558
SLC6A20	protein-coding	chr3:45755449-45796543	-	hsa:54716	solute carrier family 6 (proline IMINO transporter), member 20	-1.6598	0.0416998	20	33	9	8
LRRC32	protein-coding	chr11:76657441-76670941	-	hsa:2615	leucine rich repeat containing 32	1.40078	0.0501122	9	17	42	27
ACHE	protein-coding	chr7:100889994-100895971	-	hsa:43	acetylcholinesterase (Yt blood group)	1.35832	0.0327857	19	13	42	45
BCL7C	protein-coding	chr16:30887795-30894543	-	hsa:9274	B-cell CLL/lymphoma 7C	0.840848	0.0121639	97	74	159	165
RNU5D-1	snRNA	chr1:44731069-44731168	-	hsa:26830	RNA, U5D small nuclear 1	1.22076	0.000723351	45	68	113	157
BCL9L	protein-coding	chr11:118897758-118925677	-	hsa:283149	B-cell CLL/lymphoma 9-like	0.774841	6.74052e-12	2232	2743	4726	4036
TRIM80P	ncRNA	chr17:75074306-75079549	+		tripartite motif containing 80, pseudogene	1.82948	0.0123644	9	10	33	37
LRRC4B	protein-coding	chr19:50516897-50551470	-	hsa:94030	leucine rich repeat containing 4B	1.05951	0.0324784	19	52	72	75
B3GALT5	protein-coding	chr21:39657320-39662889	+	hsa:10317	UDP-Gal:betaGlcNAc beta 1,3-galactosyltransferase, polypeptide 5	2.17318	0.0021111	11	7	41	45
ERICH2	protein-coding	chr2:170770682-170778109	+	hsa:285141	glutamate-rich 2	-2.11934	0.00379522	27	51	11	7
EPN1	protein-coding	chr19:55675206-55695767	+	hsa:29924	epsin 1	0.823972	1.31149e-15	2087	2536	4388	4051
EPN3	protein-coding	chr17:50532687-50543750	+	hsa:55040	epsin 3	-1.07438	0.00193009	122	148	74	58
CCDC88A	protein-coding	chr2:55293026-55419624	-	hsa:55704	coiled-coil domain containing 88A	1.2056	1.10172e-07	122	168	320	367
ADAL	protein-coding	chr15:43330756-43353898	+	hsa:161823	adenosine deaminase-like	-0.900835	0.0429426	59	89	37	44
SLC35F2	protein-coding	chr11:107790991-107859188	-	hsa:54733	solute carrier family 35, member F2	-0.667969	2.30009e-09	1611	2318	1231	1298
ADM2	protein-coding	chr22:50481724-50486437	+	hsa:79924	adrenomedullin 2	1.3294	4.32752e-05	56	70	166	160
SLC36A1	protein-coding	chr5:151447596-151556318	+	hsa:206358	solute carrier family 36 (proton/amino acid symporter), member 1	0.757836	0.00384501	123	145	203	267
RNU5E-1	snRNA	chr1:11908154-11908272	+	hsa:26829	RNA, U5E small nuclear 1	1.56759	5.03874e-13	142	191	420	598
ACOX2	protein-coding	chr3:58505136-58537172	-	hsa:8309	acyl-CoA oxidase 2, branched chain	-1.4375	0.00656527	47	79	27	20
ACOXL	protein-coding	chr2:110732539-111093634	+	hsa:55289	acyl-CoA oxidase-like	-1.35585	0.0230275	32	70	16	24
SECTM1	protein-coding	chr17:82321293-82333951	-	hsa:6398	secreted and transmembrane 1	0.961772	2.91973e-05	127	193	315	321
THOC2	protein-coding	chrx:123600563-123733054	-	hsa:57187	THO complex 2	-0.893971	0.00186017	149	251	112	106
THOC7	protein-coding	chr3:63833870-63863923	-	hsa:80145	THO complex 7 homolog (Drosophila)	-0.603564	0.00100653	432	629	382	330
MACC1	protein-coding	chr7:20134655-20217390	-	hsa:346389	metastasis associated in colon cancer 1	-2.88366	1.47342e-09	98	125	19	12
ACSL5	protein-coding	chr10:112375265-112428380	+	hsa:51703	acyl-CoA synthetase long-chain family member 5	-1.25443	6.6579e-37	3613	4392	1615	1856
SLC37A2	protein-coding	chr11:125063067-125089235	+	hsa:219855	solute carrier family 37 (glucose-6-phosphate transporter), member 2	0.866464	0.015261	51	75	113	122
SLC37A4	protein-coding	chr11:119024351-119029568	-	hsa:2542	solute carrier family 37 (glucose-6-phosphate transporter), member 4	-0.914578	0.000275774	211	335	157	137
LAMA5	protein-coding	chr20:62319449-62367318	-	hsa:3911	laminin, alpha 5	0.956168	4.50575e-07	510	545	1251	867
ERC1	protein-coding	chr12:991208-1495933	+	hsa:23085	ELKS/RAB6-interacting/CAST family member 1	-0.730808	0.00259196	207	337	163	170
LAMB3	protein-coding	chr1:209614870-209651334	-	hsa:3914	laminin, beta 3	-0.644156	0.00298858	267	356	191	219
LAMB1	protein-coding	chr7:107923799-108003176	-	hsa:3912	laminin, beta 1	0.946699	1.29146e-13	583	742	1311	1318
LCK	protein-coding	chr1:32274113-32286165	+	hsa:3932	LCK proto-oncogene, Src family tyrosine kinase	2.04115	0.00121644	18	10	79	43
LAMC3	protein-coding	chr9:131009174-131093059	+	hsa:10319	laminin, gamma 3	0.938798	2.15278e-05	162	201	380	336
LAMC2	protein-coding	chr1:183186039-183245127	+	hsa:3918	laminin, gamma 2	-1.37749	1.05894e-21	1138	1283	492	474
EREG	protein-coding	chr4:74365143-74388760	+	hsa:2069	epiregulin	-0.88894	1.66423e-21	5358	6319	3271	3252
RXRA	protein-coding	chr9:134406582-134440586	+	hsa:6256	retinoid X receptor, alpha	0.884295	0.038232	42	52	68	112
ERN2	protein-coding	chr16:23692273-23713248	-	hsa:10595	endoplasmic reticulum to nucleus signaling 2	-5.72642	0.00538953	8	11	0	0
SLC38A2	protein-coding	chr12:46358188-46372825	-	hsa:54407	solute carrier family 38, member 2	-0.812132	1.37799e-22	7779	9527	4877	5308
SLC38A9	protein-coding	chr5:55625845-55712300	-	hsa:153129	solute carrier family 38, member 9	-0.686419	0.000903466	377	411	267	241
FOXD2	protein-coding	chr1:47436017-47440691	+	hsa:2306	forkhead box D2	0.759117	0.0202622	63	101	130	153
FOXA3	protein-coding	chr19:45864260-45873797	+	hsa:3171	forkhead box A3	0.761233	0.000232072	202	253	351	446
FOXC1	protein-coding	chr6:1610446-1613897	+	hsa:2296	forkhead box C1	0.945555	1.08052e-12	586	742	1360	1271
MAG	protein-coding	chr19:35292086-35313807	+	hsa:4099	myelin associated glycoprotein	5.92579	0.00280226	0	0	15	8
DPEP2	protein-coding	chr16:67987390-67994358	-	hsa:64174	dipeptidase 2	4.98173	0.0348997	0	0	7	5
ESF1	protein-coding	chr20:13714322-13784886	-	hsa:51575	ESF1, nucleolar pre-rRNA processing protein, homolog (S. cerevisiae)	-0.738503	0.0449774	100	107	64	65
MIA	protein-coding	chr19:40775377-40777493	+	hsa:8190	melanoma inhibitory activity	6.19184	0.00106532	0	0	12	16
NME5	protein-coding	chr5:138115178-138138785	-	hsa:8382	NME/NM23 family member 5	-4.12059	0.0488959	3	15	0	1
NME4	protein-coding	chr16:397192-400754	+	hsa:4833	NME/NM23 nucleoside diphosphate kinase 4	0.584993	2.0546e-06	822	978	1324	1470
ALS2CL	protein-coding	chr3:46669189-46693693	-	hsa:259173	ALS2 C-terminal like	0.928967	0.000346666	106	143	216	272
FOXP4	protein-coding	chr6:41546426-41602384	+	hsa:116113	forkhead box P4	0.93032	1.03334e-06	381	441	937	677
FOXQ1	protein-coding	chr6:1312440-1314758	+	hsa:94234	forkhead box Q1	4.62092	0.0121501	1	0	12	14
FOXO1	protein-coding	chr13:40555680-40566368	-	hsa:2308	forkhead box O1	-0.588818	0.00427506	355	641	354	313
FOXJ1	protein-coding	chr17:76136333-76141299	-	hsa:2302	forkhead box J1	1.59019	0.0274665	9	13	30	38
FOXK1	protein-coding	chr7:4644691-4767691	+	hsa:221937	forkhead box K1	1.08644	9.87685e-06	117	157	322	274
MVP	protein-coding	chr16:29820394-29848039	+	hsa:9961	major vault protein	0.598864	1.61501e-06	1378	1420	2161	2260
RIBC2	protein-coding	chr22:45413769-45422973	+	hsa:26150	RIB43A domain with coiled-coils 2	-1.15632	0.0242113	64	65	38	22
JAG1	protein-coding	chr20:10637684-10674046	-	hsa:182	jagged 1	-0.938476	2.23764e-10	768	1153	511	511
MYC	protein-coding	chr8:127736069-127741434	+	hsa:4609	v-myc avian myelocytomatosis viral oncogene homolog	-0.65017	3.50885e-15	5612	7346	4102	4392
RASGRP1	protein-coding	chr15:38488097-38564800	-	hsa:10125	RAS guanyl releasing protein 1 (calcium and DAG-regulated)	-1.39291	0.0216823	44	44	17	18
RASGRP4	protein-coding	chr19:38409058-38426305	-	hsa:115727	RAS guanyl releasing protein 4	5.87127	0.0038104	0	0	17	5
CACNA1H	protein-coding	chr16:1153395-1215332	+	hsa:8912	calcium channel, voltage-dependent, T type, alpha 1H subunit	0.719424	6.42466e-06	655	696	1264	1044
CACNA1G	protein-coding	chr17:50561068-50627474	+	hsa:8913	calcium channel, voltage-dependent, T type, alpha 1G subunit	1.07432	0.000276744	76	164	277	228
NF2	protein-coding	chr22:29628654-29698598	+	hsa:4771	neurofibromin 2 (merlin)	0.608661	9.83059e-05	432	534	790	727
RARA-AS1	ncRNA	chr17:40340867-40343136	-	hsa:101929693	RARA antisense RNA 1	0.806358	0.0114976	69	94	135	158
NHS	protein-coding	chrx:17635293-17735994	+	hsa:4810	Nance-Horan syndrome (congenital cataracts and dental anomalies)	2.61359	0.0170218	3	3	21	17
GAS2L1	protein-coding	chr22:29306618-29312787	+	hsa:10634	growth arrest-specific 2 like 1	0.981696	6.39334e-14	566	686	1270	1282
CDK2AP2	protein-coding	chr11:67506490-67508728	-	hsa:10263	cyclin-dependent kinase 2 associated protein 2	0.657838	1.02823e-09	1086	1492	1993	2181
EPCAM	protein-coding	chr2:47369148-47387028	+	hsa:4072	epithelial cell adhesion molecule	-0.791338	2.02791e-08	1263	2008	1024	892
NOV	protein-coding	chr8:119416312-119424438	+	hsa:4856	nephroblastoma overexpressed	-2.66907	0.00094156	36	43	2	11
GADD45B	protein-coding	chr19:2476127-2478259	+	hsa:4616	growth arrest and DNA-damage-inducible, beta	0.671252	7.62484e-06	504	567	823	948
GADD45A	protein-coding	chr1:67685177-67688338	+	hsa:1647	growth arrest and DNA-damage-inducible, alpha	-0.628944	0.00814322	214	340	187	177
ETV2	protein-coding	chr19:35641737-35644871	+	hsa:2116	ets variant 2	1.33038	0.0341179	21	13	46	45
RNF144B	protein-coding	chr6:18387329-18468619	+	hsa:255488	ring finger protein 144B	-1.67998	0.00204855	50	75	15	25
AHI1	protein-coding	chr6:135283972-135497765	-	hsa:54806	Abelson helper integration site 1	-0.963664	0.0235187	84	111	66	36
CCDC102B	protein-coding	chr18:68715221-69055189	+	hsa:79839	coiled-coil domain containing 102B	-4.28966	0.0313076	8	11	0	1
CCDC102A	protein-coding	chr16:57512178-57538305	-	hsa:92922	coiled-coil domain containing 102A	1.23177	8.50909e-06	80	110	239	218
CPNE2	protein-coding	chr16:57092543-57147966	+	hsa:221184	copine II	0.665835	2.45255e-07	718	888	1349	1276
CPNE9	protein-coding	chr3:9704004-9729908	+	hsa:151835	copine family member IX	-1.69432	0.0450981	26	23	6	10
PNPLA6	protein-coding	chr19:7534242-7561767	+	hsa:10908	patatin-like phospholipase domain containing 6	0.636043	1.35704e-12	2518	3118	4373	4667
HSPD1P4	pseudo	chr12:56510941-56513190	+		heat shock 60kDa protein 1 (chaperonin) pseudogene 4	-1.53753	0.0474281	18	49	7	16
SNORA2C	snoRNA					4.95506	0.0388928	0	0	3	9
SNORA31	snoRNA	chr13:45337480-45337609	-	hsa:677814	small nucleolar RNA, H/ACA box 31	-1.92514	0.0258332	33	25	13	3
PEAK1	protein-coding	chr15:77108156-77161565	-	hsa:79834	pseudopodium-enriched atypical kinase 1	0.679172	1.18846e-08	836	1019	1514	1552
SNORA12	snoRNA	chr10:100237156-100237302	-	hsa:677800	small nucleolar RNA, H/ACA box 12	1.27423	0.02616	20	20	45	56
GLTSCR1	protein-coding	chr19:47608196-47703277	+	hsa:29998	glioma tumor suppressor candidate region gene 1	1.05306	3.52379e-05	120	177	359	268
PAM	protein-coding	chr5:102865827-103029716	+	hsa:5066	peptidylglycine alpha-amidating monooxygenase	-1.25488	1.9689e-38	4339	5974	2271	2153
PGF	protein-coding	chr14:74941830-74955764	-	hsa:5228	placental growth factor	0.670194	0.0145218	116	134	179	234
FGF18	protein-coding	chr5:171419663-171457626	+	hsa:8817	fibroblast growth factor 18	1.75229	0.0302393	8	8	29	27
PML	protein-coding	chr15:73994673-74036394	+	hsa:5371	promyelocytic leukemia	0.659788	1.34271e-06	671	806	1256	1151
EVPL	protein-coding	chr17:76006845-76027452	-	hsa:2125	envoplakin	0.779439	1.91843e-10	731	1046	1566	1553
PRX	protein-coding	chr19:40393764-40413364	-	hsa:57716	periaxin	0.684606	0.0230669	77	127	168	165
PSD	protein-coding	chr10:102402617-102419934	-	hsa:5662	pleckstrin and Sec7 domain containing	1.06227	3.47882e-05	99	192	311	301
NADK2	protein-coding	chr5:36192589-36241798	-	hsa:133686	NAD kinase 2, mitochondrial	-0.636192	0.0181301	176	230	145	123
JDP2	protein-coding	chr14:75426975-75470457	+	hsa:122953	Jun dimerization protein 2	0.88	4.1891e-06	227	264	457	478
SMIM6	protein-coding	chr17:75646566-75647977	+	hsa:100130933	small integral membrane protein 6	-2.49929	0.000837809	28	56	5	10
RPS6KA3	protein-coding	chrx:20149911-20266621	-	hsa:6197	ribosomal protein S6 kinase, 90kDa, polypeptide 3	-0.854323	2.89652e-07	531	703	353	348
RNA28S5	rRNA	nt_167214.1:105424-118780	+	hsa:100008589	RNA, 28S ribosomal 5	1.10292	0.0354729	546	1526	2062	2312
CLDN7	protein-coding	chr17:7259903-7262945	-	hsa:1366	claudin 7	-0.81724	7.94267e-17	3671	4272	2248	2424
CLDN4	protein-coding	chr7:73830863-73832693	+	hsa:1364	claudin 4	-0.606816	7.40422e-13	6033	7397	4392	4718
L1CAM	protein-coding	chrx:153861514-153875944	-	hsa:3897	L1 cell adhesion molecule	1.33566	8.03573e-17	315	351	870	872
GTDC1	protein-coding	chr2:143945787-144332271	-	hsa:79712	glycosyltransferase-like domain containing 1	-0.666909	0.00447877	219	315	170	174
CLDN2	protein-coding	chrx:106920376-106930861	+	hsa:9075	claudin 2	2.09018	0.0300805	4	7	34	13
SNORD3D	snoRNA	chr17:19112420-19112636	-	hsa:780854	small nucleolar RNA, C/D box 3D	0.998208	3.71807e-06	207	429	554	724
SNORD3C	snoRNA	chr17:19190029-19190245	-	hsa:780853	small nucleolar RNA, C/D box 3C	0.786524	0.0499199	42	62	97	86
SNORD3A	snoRNA	chr17:19188016-19188232	+	hsa:780851	small nucleolar RNA, C/D box 3A	0.984861	4.5379e-09	380	512	757	1063
SNORD47	snoRNA	chr1:173864369-173864445	-	hsa:26802	small nucleolar RNA, C/D box 47	-0.867358	0.00857632	117	153	79	73
CCL26	protein-coding	chr7:75769533-75772362	-	hsa:10344	chemokine (C-C motif) ligand 26	2.01512	0.0445666	1	11	18	29
HIST1H2BL	protein-coding	chr6:27807479-27807931	-	hsa:8340	histone cluster 1, H2bl	0.63661	2.71461e-06	1494	1558	2136	2829
HIST1H2AJ	protein-coding	chr6:27814302-27814740	-	hsa:8331	histone cluster 1, H2aj	0.639649	2.75036e-11	12135	14030	18893	23476
DENND5B-AS1	ncRNA	chr12:31589923-31615351	+	hsa:100874249	DENND5B antisense RNA 1	4.67485	0.0106254	1	0	12	15
EXD1	protein-coding	chr15:41182728-41230757	-	hsa:161829	exonuclease 3'-5' domain containing 1	-5.25308	0.0266331	1	14	0	0
RET	protein-coding	chr10:43077069-43127504	+	hsa:5979	ret proto-oncogene	1.13565	0.000169935	76	96	215	173
LOC101060341	protein-coding	chr7:55746453-55750715	-	hsa:101060341	putative uncharacterized protein FLJ46235-like	5.32086	0.0178441	0	0	12	3
NRGN	protein-coding	chr11:124739933-124747206	+	hsa:4900	neurogranin (protein kinase C substrate, RC3)	0.667265	2.54719e-05	351	468	640	697
FXYD6	protein-coding	chr11:117836976-117877031	-	hsa:53826	FXYD domain containing ion transport regulator 6	1.85353	4.19914e-09	52	56	195	210
EXO5	protein-coding	chr1:40508736-40516046	+	hsa:64789	exonuclease 5	1.24745	0.00190774	36	53	89	128
LASP1	protein-coding	chr17:38869859-38921770	+	hsa:3927	LIM and SH3 protein 1	0.67132	0.0497002	1130	923	1573	1901
ALG8	protein-coding	chr11:78100946-78139660	-	hsa:79053	ALG8, alpha-1,3-glucosyltransferase	-0.702283	1.08405e-05	624	754	448	426
ALG6	protein-coding	chr1:63367590-63438562	+	hsa:29929	ALG6, alpha-1,3-glucosyltransferase	-0.742441	0.00565437	200	227	142	122
H2AFX	protein-coding	chr11:119093874-119095467	-	hsa:3014	H2A histone family, member X	0.634134	4.39685e-13	9494	12020	15546	18943
NRP1	protein-coding	chr10:33177491-33334905	-	hsa:8829	neuropilin 1	-2.20082	0.000895543	40	63	6	17
SZRD1	protein-coding	chr1:16367030-16398148	+	hsa:26099	SUZ RNA binding domain containing 1	0.580235	0.002362	393	415	521	742
BICDL2	protein-coding					-1.5171	4.47235e-06	141	178	53	62
NT5E	protein-coding	chr6:85449584-85495791	+	hsa:4907	5'-nucleotidase, ecto (CD73)	-0.782403	8.28676e-12	1628	1965	1070	1088
ALPP	protein-coding	chr2:232378534-232382889	+	hsa:250	alkaline phosphatase, placental	6.08821	9.53813e-11	2	1	94	118
FBXO2	protein-coding	chr1:11648361-11654831	-	hsa:26232	F-box protein 2	0.896383	4.87594e-17	992	1322	2131	2296
SCD	protein-coding	chr10:100347015-100364831	+	hsa:6319	stearoyl-CoA desaturase (delta-9-desaturase)	-0.65788	4.70168e-17	45399	65233	35034	36635
BCRP2	pseudo	chr22:21103016-21122286	+	hsa:400892	breakpoint cluster region pseudogene 2	2.96003	0.0461204	1	2	6	18
SHF	protein-coding	chr15:45167214-45187966	-	hsa:90525	Src homology 2 domain containing F	2.20001	8.30627e-12	41	51	189	248
FERMT1	protein-coding	chr20:6074845-6123544	-	hsa:55612	fermitin family member 1	-0.584032	9.76878e-06	1118	1504	949	843
SP5	protein-coding	chr2:170714725-170717988	+	hsa:389058	Sp5 transcription factor	1.2133	0.020641	24	25	60	58
ST5	protein-coding	chr11:8693352-8835667	-	hsa:6764	suppression of tumorigenicity 5	0.65239	0.00329364	162	236	290	351
AMN1	protein-coding	chr12:31671137-31729174	-	hsa:196394	antagonist of mitotic exit network 1 homolog (S. cerevisiae)	-0.848865	8.19223e-06	404	665	302	300
EGLN2	protein-coding	chr19:40799429-40808441	+	hsa:112398	egl-9 family hypoxia-inducible factor 2	0.607535	3.15047e-07	1005	1158	1689	1724
SF3A2	protein-coding	chr19:2236817-2248679	+	hsa:8175	splicing factor 3a, subunit 2, 66kDa	0.596555	1.4256e-09	2167	2552	3678	3703
SYK	protein-coding	chr9:90801680-90898560	+	hsa:6850	spleen tyrosine kinase	-3.9271	4.16024e-21	159	244	13	14
CLIC3	protein-coding	chr9:136994608-136996572	-	hsa:9022	chloride intracellular channel 3	2.26512	1.15617e-11	42	40	195	216
CORO1A	protein-coding	chr16:30183410-30189076	+	hsa:11151	coronin, actin binding protein, 1A	1.41824	1.9952e-07	83	95	229	264
CD46P1	pseudo	chr1:207645079-207657411	+		CD46 molecule, complement regulatory protein pseudogene 1	-1.75476	0.0302117	22	34	6	11
SAT1	protein-coding	chrx:23783158-23786223	+	hsa:6303	spermidine/spermine N1-acetyltransferase 1	-0.679095	1.27082e-10	3198	4885	2595	2542
LOC105372578	lncRNA	chr20:24929216-24932985	+		uncharacterized LOC105372578	-1.88376	0.000368134	74	84	31	13
IKBIP	protein-coding	chr12:98613404-98645051	-	hsa:121457	IKBKB interacting protein	0.617129	0.0438296	84	105	143	156
PRODH	protein-coding	chr22:18912774-18936553	-	hsa:5625	proline dehydrogenase (oxidase) 1	3.73433	0.0142479	2	0	14	15
TTN	protein-coding	chr2:178525989-178807423	-	hsa:7273	titin	-3.81257	0.0153888	8	20	0	2
NTN1	protein-coding	chr17:9021542-9244000	+	hsa:9423	netrin 1	0.883585	0.00904931	79	84	183	128
NTN4	protein-coding	chr12:95657807-95790758	-	hsa:59277	netrin 4	1.31738	0.0317447	28	12	54	54
WNK2	protein-coding	chr9:93184156-93319210	+	hsa:65268	WNK lysine deficient protein kinase 2	1.14395	2.20665e-10	242	305	655	588
WNK1	protein-coding	chr12:752598-911452	+	hsa:65125	WNK lysine deficient protein kinase 1	0.674997	0.00118749	248	282	482	392
ANK3	protein-coding	chr10:60028401-60389817	-	hsa:288	ankyrin 3, node of Ranvier (ankyrin G)	-1.32153	7.74989e-06	168	228	71	92
ANK2	protein-coding	chr4:112818105-113383736	+	hsa:287	ankyrin 2, neuronal	5.20318	0.0209223	0	0	8	6
MAP1B	protein-coding	chr5:72179628-72209570	+	hsa:4131	microtubule-associated protein 1B	0.922625	0.0407641	34	41	68	79
MAP1S	protein-coding	chr19:17719352-17734513	+	hsa:55201	microtubule-associated protein 1S	0.726965	5.73639e-08	916	992	1706	1572
CAPZA2	protein-coding	chr7:116862478-116919261	+	hsa:830	capping protein (actin filament) muscle Z-line, alpha 2	-0.670409	0.0360307	114	156	86	88
ANO2	protein-coding	chr12:5562651-5946232	-	hsa:57101	anoctamin 2, calcium activated chloride channel	4.94822	0.041796	0	0	2	10
SBF1	protein-coding	chr22:50446806-50469888	-	hsa:6305	SET binding factor 1	0.966263	2.31769e-17	2221	2623	5262	4504
CLIP3	protein-coding	chr19:36014660-36032671	-	hsa:25999	CAP-GLY domain containing linker protein 3	4.13128	0.0426401	1	0	3	16
CLIP2	protein-coding	chr7:74289475-74405943	+	hsa:7461	CAP-GLY domain containing linker protein 2	0.964463	1.20238e-20	2085	2318	4434	4485
WNT6	protein-coding	chr2:218859823-218874232	+	hsa:7475	wingless-type MMTV integration site family, member 6	1.5424	3.34285e-06	47	63	164	165
SLC4A8	protein-coding	chr12:51424810-51474577	+	hsa:9498	solute carrier family 4, sodium bicarbonate cotransporter, member 8	2.43036	0.0171292	2	6	23	20
AKT1S1	protein-coding	chr19:49869033-49877387	-	hsa:84335	AKT1 substrate 1 (proline-rich)	0.663068	4.57606e-11	1523	1882	2639	2929
HAPLN3	protein-coding	chr15:88877294-88895549	-	hsa:145864	hyaluronan and proteoglycan link protein 3	0.680738	0.00237758	229	219	336	417
SIAH1	protein-coding	chr16:48360543-48385318	-	hsa:6477	siah E3 ubiquitin protein ligase 1	-0.735028	0.00046747	304	445	242	217
CCNJL	protein-coding	chr5:160251652-160339592	-	hsa:79616	cyclin J-like	0.992576	5.76838e-05	126	168	331	268
ADORA1	protein-coding	chr1:203128914-203167405	+	hsa:134	adenosine A1 receptor	0.609148	0.0339188	94	125	173	170
CCNI2	protein-coding	chr5:132747402-132754165	+	hsa:645121	cyclin I family, member 2	1.29524	0.0201737	14	32	59	54
AOC2	protein-coding	chr17:42844592-42850707	+	hsa:314	amine oxidase, copper containing 2 (retina-specific)	-1.05708	0.00317042	99	178	55	80
FBXL19	protein-coding	chr16:30924575-30948783	+	hsa:54620	F-box and leucine-rich repeat protein 19	0.58828	9.56181e-06	680	1027	1333	1282
CCND3	protein-coding	chr6:41934933-41941848	-	hsa:896	cyclin D3	0.60531	4.8089e-07	814	1005	1363	1494
LOC107986695	lncRNA					3.18644	0.0232975	1	2	9	19
CALML4	protein-coding	chr15:68190705-68206110	-	hsa:91860	calmodulin-like 4	-0.800195	0.0309932	82	142	69	61
TINAGL1	protein-coding	chr1:31578145-31587686	+	hsa:64129	tubulointerstitial nephritis antigen-like 1	1.01758	1.09781e-20	2430	2561	4982	5559
LOC105372412	protein-coding	chr19:43687557-43700538	+		phospholipase A2 inhibitor and Ly6/PLAUR domain-containing protein-like	-5.03229	0.0335907	4	8	0	0
C19orf33	protein-coding	chr19:38304161-38305006	+	hsa:64073	chromosome 19 open reading frame 33	0.63698	8.08012e-07	1381	1541	2042	2692
LOC107986648	ncRNA					-5.24566	0.0206946	8	5	0	0
C19orf66	protein-coding	chr19:10086119-10093252	+	hsa:55337	chromosome 19 open reading frame 66	0.713663	0.000363794	234	286	471	407
C11orf1	protein-coding	chr11:111879190-111884083	+	hsa:64776	chromosome 11 open reading frame 1	-0.70577	0.003687	208	354	174	175
SCG2	protein-coding	chr2:223596940-223602499	-	hsa:7857	secretogranin II	-1.83387	7.23269e-07	117	157	37	42
SNORA74A	snoRNA	chr5:139278780-139278979	+	hsa:26821	small nucleolar RNA, H/ACA box 74A	-1.6325	0.000398596	61	134	27	36
SNORA71A	snoRNA	chr20:38427306-38427443	-	hsa:26777	small nucleolar RNA, H/ACA box 71A	-0.672085	0.0388206	116	148	76	95
VGF	protein-coding	chr7:101162509-101169956	-	hsa:7425	VGF nerve growth factor inducible	-0.83777	3.89332e-05	398	442	218	271
VIM	protein-coding	chr10:17227935-17237593	+	hsa:7431	vimentin	2.17534	8.14179e-22	79	113	428	461
RNU4ATAC	snRNA	chr2:121530880-121531009	+	hsa:100151683	RNA, U4atac small nuclear (U12-dependent splicing)	1.81017	0.000116744	35	20	100	106
SLC2A3	protein-coding	chr12:7919228-7936296	-	hsa:6515	solute carrier family 2 (facilitated glucose transporter), member 3	2.04763	2.71369e-50	432	449	1805	1988
CDCA7L	protein-coding	chr7:21900899-21945924	-	hsa:55536	cell division cycle associated 7-like	-0.674718	6.69592e-09	2116	3248	1759	1658
GAPDHP1	pseudo	chrx:39786931-39787959	-		glyceraldehyde-3-phosphate dehydrogenase pseudogene 1	-0.61705	0.000724826	426	602	302	386
APLF	protein-coding	chr2:68467559-68580162	+	hsa:200558	aprataxin and PNKP like factor	-2.43528	0.00950257	13	42	4	6
RAET1G	protein-coding	chr6:149916878-149923152	-	hsa:353091	retinoic acid early transcript 1G	1.60104	0.0336589	5	18	31	38
SDC1	protein-coding	chr2:20200797-20225166	-	hsa:6382	syndecan 1	0.680087	3.95154e-10	1581	1966	2633	3243
PRR15	protein-coding	chr7:29564384-29567300	+	hsa:222171	proline rich 15	-0.752714	0.037565	86	138	70	65
PRR12	protein-coding	chr19:49591177-49614946	+	hsa:57479	proline rich 12	0.913916	7.55706e-08	534	879	1530	1159
SMPD1	protein-coding	chr11:6390301-6394561	+	hsa:6609	sphingomyelin phosphodiesterase 1, acid lysosomal	0.637116	0.00132839	227	289	432	393
AMIGO3	protein-coding	chr3:49716834-49719805	-	hsa:386724	adhesion molecule with Ig-like domain 3	0.913022	0.019841	55	50	103	104
CALCOCO2	protein-coding	chr17:48830988-48865245	+	hsa:10241	calcium binding and coiled-coil domain 2	-0.636874	8.56763e-09	1754	2386	1257	1479
HS3ST1	protein-coding	chr4:11398364-11428913	-	hsa:9957	heparan sulfate (glucosamine) 3-O-sulfotransferase 1	-1.37825	1.20014e-22	1035	1507	514	484
LOC105372296	lncRNA	chr19:16628432-16629722	+		uncharacterized LOC105372296	2.0624	0.00439062	12	7	31	54
LOC105372281	lncRNA	chr19:12826785-12833089	+		uncharacterized LOC105372281	1.57658	0.00449168	28	15	58	80
LOC105372238	lncRNA	chr19:1940114-1941074	-		uncharacterized LOC105372238	2.44627	0.0303693	3	3	16	18
MAPK4	protein-coding	chr18:50722107-50731826	+	hsa:5596	mitogen-activated protein kinase 4	-3.13592	0.00028522	20	61	6	3
AQP3	protein-coding	chr9:33441154-33447633	-	hsa:360	aquaporin 3 (Gill blood group)	1.15405	3.17638e-07	167	175	346	448
PROM2	protein-coding	chr2:95274448-95291308	+	hsa:150696	prominin 2	-1.83106	0.00113524	66	62	12	26
PROM1	protein-coding	chr4:15968226-16080700	-	hsa:8842	prominin 1	-1.98743	8.79245e-11	215	250	70	51
LOC107986876	protein-coding					5.99166	0.0023936	0	0	17	7
XDH	protein-coding	chr2:31334322-31414745	-	hsa:7498	xanthine dehydrogenase	5.912	0.00274642	0	0	11	12
SELL	protein-coding	chr1:169690665-169711702	-	hsa:6402	selectin L	-2.58873	3.94262e-05	40	87	13	8
MIR6845	ncRNA	chr8:143837756-143837776	-	hsa:102466748	microRNA 6845	-4.94962	0.0395221	5	6	0	0
AREG	protein-coding	chr4:74445098-74455009	+	hsa:374	amphiregulin	-1.23902	3.59227e-17	1211	2106	683	738
LOC105372990	lncRNA	chr22:30432686-30436501	+		uncharacterized LOC105372990	0.953513	0.0112205	74	53	126	135
MAST3	protein-coding	chr19:18109250-18149726	+	hsa:23031	microtubule associated serine/threonine kinase 3	0.786047	6.58694e-09	654	924	1471	1309
PELI3	protein-coding	chr11:66466865-66477337	+	hsa:246330	pellino E3 ubiquitin protein ligase family member 3	0.624765	0.000407825	278	425	552	553
ARV1	protein-coding	chr1:230979077-231000733	+	hsa:64801	ARV1 homolog (S. cerevisiae)	-1.21204	0.0411404	37	51	18	21
PELI1	protein-coding	chr2:64092652-64144471	-	hsa:57162	pellino E3 ubiquitin protein ligase 1	-0.719137	0.0411988	104	139	87	64
ARSI	protein-coding	chr5:150296346-150302962	-	hsa:340075	arylsulfatase family, member I	3.18032	0.00049993	3	4	36	29
PRRT2	protein-coding	chr16:29812088-29815881	+	hsa:112476	proline-rich transmembrane protein 2	1.35317	0.00497842	27	28	73	73
LOC107986991	lncRNA					-0.885768	0.00545515	126	180	72	98
ADAT3	protein-coding	chr19:1905372-1913447	+	hsa:113179	adenosine deaminase, tRNA-specific 3	1.18706	0.000277607	79	68	181	170
ADAT2	protein-coding	chr6:143422832-143450704	-	hsa:134637	adenosine deaminase, tRNA-specific 2	-0.951898	0.00074485	160	233	95	113
MIR6767	ncRNA	chr16:2445392-2445457	+	hsa:102465459	microRNA 6767	1.68128	0.0180207	9	13	40	32
LOC100996756	ncRNA	chr1:146387144-146388091	+	hsa:100996756	uncharacterized LOC100996756	1.12093	2.59289e-07	165	210	356	487
ELAC1	protein-coding	chr18:50968017-50988120	+	hsa:55520	elaC ribonuclease Z 1	-0.671047	0.0332212	125	206	84	128
ASB4	protein-coding	chr7:95485901-95528801	+	hsa:51666	ankyrin repeat and SOCS box containing 4	5.00156	0.0378191	0	0	10	2
ALDH4A1	protein-coding	chr1:18871430-18902799	-	hsa:8659	aldehyde dehydrogenase 4 family, member A1	0.741728	6.44157e-06	360	454	625	781
DCLK1	protein-coding	chr13:35768652-36131377	-	hsa:9201	doublecortin-like kinase 1	3.3494	3.11091e-13	11	16	123	160
MARC1	protein-coding	chr1:220786697-220814394	+	hsa:64757	mitochondrial amidoxime reducing component 1	-0.59497	0.00239415	342	442	245	290
MCOLN2	protein-coding	chr1:84937984-84997113	-	hsa:255231	mucolipin 2	-0.698989	0.0130036	156	210	103	129
ASNS	protein-coding	chr7:97852117-97872542	-	hsa:440	asparagine synthetase (glutamine-hydrolyzing)	-0.659073	3.41198e-12	3307	4045	2283	2529
SNORD3B-2	snoRNA	chr17:19063920-19064136	-	hsa:780852	small nucleolar RNA, C/D box 3B-2	0.931081	2.54122e-05	143	220	327	380
HOXB9	protein-coding	chr17:48621156-48626473	-	hsa:3219	homeobox B9	0.870796	1.11209e-12	710	1045	1622	1656
HOXB8	protein-coding	chr17:48612346-48622853	-	hsa:3218	homeobox B8	0.829558	9.62771e-09	452	596	875	1043
HOXB4	protein-coding	chr17:48548870-48575413	-	hsa:3214	homeobox B4	0.849444	3.06668e-10	600	709	1126	1317
HOXA4	protein-coding	chr7:27128507-27130780	-	hsa:3201	homeobox A4	1.14266	0.00329947	38	61	120	102
HOXA3	protein-coding	chr7:27106190-27119595	-	hsa:3200	homeobox A3	0.956999	0.00011438	123	143	247	288
SLC9A1	protein-coding	chr1:27098809-27155130	-	hsa:6548	solute carrier family 9, subfamily A (NHE1, cation proton antiporter 1), member 1	0.748164	9.89104e-07	409	495	787	780
TSPAN1	protein-coding	chr1:46175077-46185962	+	hsa:10103	tetraspanin 1	-0.664344	0.0423143	122	139	77	94
TSPAN4	protein-coding	chr11:844446-867116	+	hsa:7106	tetraspanin 4	0.652147	6.29118e-05	347	536	662	754
LOC105372838	lncRNA	chr21:45327344-45331052	-		uncharacterized LOC105372838	6.49275	0.000527881	0	0	6	29
MEMO1P4	pseudo	chrx:123765322-123765692	+		mediator of cell motility 1 pseudogene 4	4.87481	0.0481811	0	0	9	2
SLC9A7	protein-coding	chrx:46599727-46759162	-	hsa:84679	solute carrier family 9, subfamily A (NHE7, cation proton antiporter 7), member 7	-0.661665	4.04804e-06	882	1427	731	751
SLC9A9	protein-coding	chr3:143265976-143693261	-	hsa:285195	solute carrier family 9, subfamily A (NHE9, cation proton antiporter 9), member 9	-3.57189	0.0294238	13	9	0	2
SLC9A2	protein-coding	chr2:102619689-102711350	+	hsa:6549	solute carrier family 9, subfamily A (NHE2, cation proton antiporter 2), member 2	-1.77143	0.0127154	34	38	8	14
FASN	protein-coding	chr17:82078338-82098303	-	hsa:2194	fatty acid synthase	0.607308	0.0255439	15807	17459	29886	22559
ATN1	protein-coding	chr12:6924463-6942321	+	hsa:1822	atrophin 1	0.714152	5.6683e-09	1810	2149	3657	3040
WTIP	protein-coding	chr19:34481975-34501180	+	hsa:126374	Wilms tumor 1 interacting protein	1.64496	2.502e-05	41	47	172	111
ZYX	protein-coding	chr7:143381267-143391111	+	hsa:7791	zyxin	0.804335	4.64241e-10	749	836	1389	1484
S100A14	protein-coding	chr1:153614255-153616332	-	hsa:57402	S100 calcium binding protein A14	-2.16085	8.06307e-80	2181	3082	583	622
SHC1	protein-coding	chr1:154965289-154974406	-	hsa:6464	SHC (Src homology 2 domain containing) transforming protein 1	0.800619	5.51855e-22	5137	6183	9831	10561
LRRC75A	protein-coding	chr17:16442015-16483976	-	hsa:388341	leucine rich repeat containing 75A	0.869568	0.0446154	32	61	94	77
ADCY9	protein-coding	chr16:3953387-4116012	-	hsa:115	adenylate cyclase 9	0.748905	8.31326e-08	539	642	1032	1018
LOC105372707	lncRNA	chr20:62305432-62308079	-		uncharacterized LOC105372707	2.65646	0.003497	9	1	30	40
LOC105372726	lncRNA	chr20:63653130-63655003	+		uncharacterized LOC105372726	1.69478	0.0404803	10	6	29	26
INTS10	protein-coding	chr8:19817149-19852078	+	hsa:55174	integrator complex subunit 10	-0.686182	2.52879e-07	1234	1912	1034	953
SLC6A9	protein-coding	chr1:43996483-44017340	-	hsa:6536	solute carrier family 6 (neurotransmitter transporter, glycine), member 9	0.684251	0.00609362	149	165	228	297
SOWAHD	protein-coding	chrx:119758613-119760202	+	hsa:347454	sosondowah ankyrin repeat domain family member D	1.62561	0.01938	15	9	36	43
DBH-AS1	ncRNA	chr9:133654587-133657408	-	hsa:138948	DBH antisense RNA 1	5.31026	0.0165655	0	0	10	5
FBN3	protein-coding	chr19:8065402-8149127	-	hsa:84467	fibrillin 3	1.18709	0.00106387	41	96	168	143
SCUBE1	protein-coding	chr22:43203223-43343388	-	hsa:80274	signal peptide, CUB domain, EGF-like 1	1.14466	0.00134075	50	62	131	124
MATN2	protein-coding	chr8:97869056-98036219	+	hsa:4147	matrilin 2	0.986073	0.0210146	33	50	80	88
LOC105372669	lncRNA	chr20:53434097-53455593	-		uncharacterized LOC105372669	5.10583	0.0273889	0	0	9	4
COL18A1	protein-coding	chr21:45455510-45513720	+	hsa:80781	collagen, type XVIII, alpha 1	0.927742	0.0468383	36	37	81	63
SIK2	protein-coding	chr11:111674367-111726068	+	hsa:23235	salt-inducible kinase 2	0.855189	0.00503329	75	126	203	165
ALDH3B1	protein-coding	chr11:68010305-68029282	+	hsa:221	aldehyde dehydrogenase 3 family, member B1	0.723736	9.64369e-08	520	670	985	1038
ALDH3A2	protein-coding	chr17:19648751-19677595	+	hsa:224	aldehyde dehydrogenase 3 family, member A2	-0.676408	5.87821e-07	965	1491	765	800
RAB43P1	pseudo	chr16:46622875-46626994	-		RAB43 pseudogene 1	1.45984	3.97308e-06	59	67	172	187
SIX2	protein-coding	chr2:45005185-45009403	-	hsa:10736	SIX homeobox 2	1.03197	0.0405795	23	35	61	60
SIX5	protein-coding	chr19:45764785-45769239	-	hsa:147912	SIX homeobox 5	0.697417	0.000463827	306	314	566	479
GAREM2	protein-coding					0.781998	2.84219e-07	378	502	778	776
GAREM1	protein-coding					-0.90586	1.02361e-05	388	465	202	270
LOC105376938	lncRNA	chr3:5684297-5697645	+		uncharacterized LOC105376938	-1.3019	2.25066e-10	358	496	175	180
NPC1L1	protein-coding	chr7:44533227-44541315	-	hsa:29881	NPC1-like 1	3.32071	0.0463297	1	1	5	16
LOC100130270	pseudo	chr1:64918369-64918841	+		NDUFA4, mitochondrial complex associated pseudogene	5.10583	0.0273889	0	0	9	4
ENSAP2	pseudo	chr14:82692507-82693198	-		endosulfine alpha pseudogene 2	0.749874	0.0457876	56	62	97	109
DCAF13	protein-coding	chr8:103414714-103443453	+	hsa:25879	DDB1 and CUL4 associated factor 13	-0.591533	1.99279e-05	1001	1601	889	864
GPER1	protein-coding	chr7:1086807-1093815	+	hsa:2852	G protein-coupled estrogen receptor 1	2.26816	2.06283e-05	29	11	83	127
MFSD2B	protein-coding	chr2:24009022-24023708	+	hsa:388931	major facilitator superfamily domain containing 2B	-1.20677	0.0178977	44	118	42	27
MAD1L1	protein-coding	chr7:1815792-2232948	-	hsa:8379	MAD1 mitotic arrest deficient-like 1 (yeast)	0.58166	0.0110081	194	225	356	291
PADI2	protein-coding	chr1:17066761-17119453	-	hsa:11240	peptidyl arginine deiminase, type II	-0.685054	0.0352147	104	189	91	93
COL15A1	protein-coding	chr9:98943713-99070792	+	hsa:1306	collagen, type XV, alpha 1	5.69201	0.0061697	0	0	5	15
MBNL1-AS1	ncRNA	chr3:152262616-152269626	-	hsa:401093	MBNL1 antisense RNA 1	1.05692	0.0323743	24	39	54	80
WWC3	protein-coding	chrx:10015755-10144478	+	hsa:55841	WWC family member 3	-0.771743	0.00300334	187	253	120	145
CEP170B	protein-coding	chr14:104865313-104896770	+	hsa:283638	centrosomal protein 170B	0.594985	9.8177e-06	1255	1357	2201	1892
PACS1	protein-coding	chr11:66070276-66228655	+	hsa:55690	phosphofurin acidic cluster sorting protein 1	0.715706	0.0196773	79	102	148	158
KRT16P6	ncRNA	chr17:16817983-16822553	-		keratin 16 pseudogene 6	4.24256	0.0293573	1	0	11	9
ARHGEF17	protein-coding	chr11:73308297-73369304	+	hsa:9828	Rho guanine nucleotide exchange factor (GEF) 17	0.908856	1.67396e-10	482	570	1024	1017
ARHGEF25	protein-coding	chr12:57610180-57617245	+	hsa:115557	Rho guanine nucleotide exchange factor (GEF) 25	0.989329	0.0140622	40	52	90	98
SPACA9	protein-coding					0.747554	0.00507384	110	151	193	258
ARHGEF40	protein-coding	chr14:21070224-21089545	+	hsa:55701	Rho guanine nucleotide exchange factor (GEF) 40	1.13206	6.71995e-10	231	264	539	585
ATP6V0C	protein-coding	chr16:2513870-2520223	+	hsa:527	ATPase, H+ transporting, lysosomal 16kDa, V0 subunit c	0.670713	4.53735e-12	3353	3757	5749	6003
U2AF1L4	protein-coding	chr19:35742527-35745442	-	hsa:199746	U2 small nuclear RNA auxiliary factor 1-like 4	0.719021	0.0147556	98	107	158	193
PNMA2	protein-coding	chr8:26504695-26513078	-	hsa:10687	paraneoplastic Ma antigen 2	2.00815	0.000154727	16	19	60	86
ITGB7	protein-coding	chr12:53191318-53207307	-	hsa:3695	integrin, beta 7	3.22664	0.0261923	1	2	23	5
ITGB4	protein-coding	chr17:75721328-75757818	+	hsa:3691	integrin, beta 4	0.896239	1.33938e-18	10097	10476	19597	20375
ITGA9	protein-coding	chr3:37452322-37819790	+	hsa:3680	integrin, alpha 9	1.81203	0.028111	8	7	29	26
ITGA2	protein-coding	chr5:52989326-53094779	+	hsa:3673	integrin, alpha 2 (CD49B, alpha 2 subunit of VLA-2 receptor)	-0.684573	8.10621e-06	822	883	536	568
LOC100129484	miscRNA	chr7:5426281-5429053	-	hsa:100129484	uncharacterized LOC100129484	1.21691	0.0305284	30	17	57	60
CASKIN2	protein-coding	chr17:75500260-75515583	-	hsa:57513	CASK interacting protein 2	0.653706	7.49502e-06	869	920	1569	1354
C1QTNF1	protein-coding	chr17:79024124-79049788	+	hsa:114897	C1q and tumor necrosis factor related protein 1	0.682073	0.0255992	91	98	154	161
JOSD2	protein-coding	chr19:50505997-50511355	-	hsa:126119	Josephin domain containing 2	0.759099	7.27631e-05	215	293	438	444
COL13A1	protein-coding	chr10:69801885-69959148	+	hsa:1305	collagen, type XIII, alpha 1	1.8988	5.61995e-06	29	30	104	125
SMYD2	protein-coding	chr1:214281101-214336789	+	hsa:56950	SET and MYND domain containing 2	-0.652348	0.000345645	390	549	297	315
LOC100996573	protein-coding	chr12:132550729-132559465	+	hsa:100996573	uncharacterized LOC100996573	1.8765	0.0312648	7	6	24	26
MOB3B	protein-coding	chr9:27325209-27529852	-	hsa:79817	MOB kinase activator 3B	-1.77119	4.31459e-07	120	240	49	57
MOB3A	protein-coding	chr19:2071036-2096502	-	hsa:126308	MOB kinase activator 3A	0.750534	4.04788e-11	953	1192	1868	1850
KLHL38	protein-coding	chr8:123644442-123653829	-	hsa:340359	kelch-like family member 38	4.94122	0.0469736	0	0	1	11
KLHL30	protein-coding	chr2:238138722-238152906	+	hsa:377007	kelch-like family member 30	1.43221	0.0127809	17	20	54	49
TBXA2R	protein-coding	chr19:3594506-3606833	-	hsa:6915	thromboxane A2 receptor	1.37375	0.00106862	36	61	164	89
RPL7P23	pseudo	chr5:77582354-77583200	+		ribosomal protein L7 pseudogene 23	-1.07812	0.00266366	95	212	74	71
RPL7P19	pseudo	chr5:138473744-138474417	+		ribosomal protein L7 pseudogene 19	-1.51519	0.000790331	75	91	29	31
RNU5A-1	snRNA	chr15:65296051-65296167	+	hsa:26831	RNA, U5A small nuclear 1	1.36771	0.0121221	15	35	49	81
REEP2	protein-coding	chr5:138439001-138446969	+	hsa:51308	receptor accessory protein 2	1.00609	0.00115213	66	152	225	212
LGALS8-AS1	ncRNA	chr1:236523069-236524508	-	hsa:100287902	LGALS8 antisense RNA 1	2.95588	0.0209517	1	3	18	13
OR51A10P	pseudo	chr11:5468504-5469359	-		olfactory receptor, family 51, subfamily A, member 10 pseudogene	-1.94067	0.0170298	24	32	7	8
SNORA100	snoRNA					-0.74521	0.016111	122	195	101	91
RPL21P11	pseudo	chr14:90366635-90367222	-		ribosomal protein L21 pseudogene 11	-3.50619	0.0373784	5	18	0	2
HOMER3	protein-coding	chr19:18929201-18941232	-	hsa:9454	homer homolog 3 (Drosophila)	0.722021	9.65539e-09	648	826	1207	1298
FHIT	protein-coding	chr3:59747278-61251461	-	hsa:2272	fragile histidine triad	-1.04222	0.0145038	94	85	51	40
RPL21P93	pseudo	chr10:28898950-28899524	-		ribosomal protein L21 pseudogene 93	-2.07093	0.0315106	11	51	12	2
FHL3	protein-coding	chr1:37996765-37999077	-	hsa:2275	four and a half LIM domains 3	0.599352	0.000549488	431	433	637	731
KIF26A	protein-coding	chr14:104152394-104180898	+	hsa:26153	kinesin family member 26A	1.23548	2.57131e-10	289	323	850	638
KIF21B	protein-coding	chr1:200969386-201023700	-	hsa:23046	kinesin family member 21B	0.847654	1.05789e-06	289	353	610	581
LONRF3	protein-coding	chrx:118974614-119013177	+	hsa:79836	LON peptidase N-terminal domain and ring finger 3	0.765261	0.000289868	170	260	376	369
LOC440600	lncRNA	chr1:110286375-110339171	-	hsa:440600	uncharacterized LOC440600	1.6526	0.0212783	13	11	24	56
FIG4	protein-coding	chr6:109691221-109825431	+	hsa:9896	FIG4 phosphoinositide 5-phosphatase	-1.02909	3.7088e-06	326	360	173	176
LOC107986282	lncRNA					1.10873	0.0144926	29	51	65	111
SDHAF4	protein-coding	chr6:70566922-70588903	+	hsa:135154	chromosome 6 open reading frame 57	-1.42045	0.0072346	43	85	25	23
SORD	protein-coding	chr15:45023104-45075089	+	hsa:6652	sorbitol dehydrogenase	-0.714232	2.74191e-06	704	982	552	499
LOC107986229	lncRNA					-5.64337	0.00736667	11	6	0	0
SOX8	protein-coding	chr16:981808-986979	+	hsa:30812	SRY (sex determining region Y)-box 8	0.674981	0.0271668	85	104	141	171
SOX4	protein-coding	chr6:21593741-21598619	+	hsa:6659	SRY (sex determining region Y)-box 4	-1.32272	8.33516e-27	2135	3301	1153	1055
LOC100130744	ncRNA	chr5:14712694-14716529	+	hsa:100130744	uncharacterized LOC100130744	-1.2745	0.0309323	32	70	24	18
NFAM1	protein-coding	chr22:42380407-42438155	-	hsa:150372	NFAT activating protein with ITAM motif 1	5.79192	0.00418118	0	0	13	8
COX6B2	protein-coding	chr19:55349702-55354814	-	hsa:125965	cytochrome c oxidase subunit VIb polypeptide 2 (testis)	1.04687	0.00697756	44	53	100	107
CALHM3	protein-coding	chr10:103472804-103479240	-	hsa:119395	calcium homeostasis modulator 3	1.95203	0.029623	3	11	18	36
SPEG	protein-coding	chr2:219460812-219493629	+	hsa:10290	SPEG complex locus	0.582367	0.000106954	424	582	721	826
FCHO1	protein-coding	chr19:17754317-17788562	+	hsa:23149	FCH domain only 1	0.655665	1.88021e-06	745	827	1325	1242
MRPL30	protein-coding	chr2:99181079-99199557	+	hsa:51263	mitochondrial ribosomal protein L30	-0.625665	4.23342e-06	1051	1679	899	898
MRPL13	protein-coding	chr8:120395844-120445407	-	hsa:28998	mitochondrial ribosomal protein L13	-0.671457	2.22992e-05	560	775	406	454
MRGPRF	protein-coding	chr11:69004394-69013382	-	hsa:116535	MAS-related GPR, member F	2.68616	0.00163234	7	3	30	39
HSPBAP1	protein-coding	chr3:122739997-122793819	-	hsa:79663	HSPB (heat shock 27kDa) associated protein 1	-0.694105	0.0139242	185	193	127	116
SPP1	protein-coding	chr4:87975650-87983411	+	hsa:6696	secreted phosphoprotein 1	-2.01027	0.0140222	23	36	5	10
CACNB3	protein-coding	chr12:48818471-48828943	+	hsa:784	calcium channel, voltage-dependent, beta 3 subunit	0.614673	6.75155e-06	537	771	1008	1041
LOC440386	unknown	chr16:74367322-74369826	+	hsa:440386	uncharacterized LOC440386	1.69657	0.030345	17	5	25	54
SNAPC4	protein-coding	chr9:136375571-136383662	-	hsa:6621	small nuclear RNA activating complex, polypeptide 4, 190kDa	0.730548	5.79084e-05	389	389	707	638
MPLKIP	protein-coding	chr7:40132743-40134652	-	hsa:136647	M-phase specific PLK1 interacting protein	-0.819707	7.49422e-05	314	509	226	248
LOC645544	pseudo	chr11:71630873-71641559	+		OTU domain-containing protein 7A-like	4.96181	0.0370128	0	0	4	8
DUSP10	protein-coding	chr1:221701420-221742176	-	hsa:11221	dual specificity phosphatase 10	-1.41166	0.0247468	33	53	13	20
PRSS12	protein-coding	chr4:118280038-118352767	-	hsa:8492	protease, serine, 12 (neurotrypsin, motopsin)	1.13841	1.90908e-15	421	609	1195	1121
DUSP26	protein-coding	chr8:33591330-33600106	-	hsa:78986	dual specificity phosphatase 26 (putative)	2.31051	0.0395651	6	1	23	15
PRSS33	protein-coding	chr16:2783953-2787759	-	hsa:260429	protease, serine, 33	5.35577	1.54271e-09	0	4	79	86
SQLE	protein-coding	chr8:124999757-125022283	+	hsa:6713	squalene epoxidase	-0.585181	6.12381e-07	1587	2426	1300	1427
ADAMTS2	protein-coding	chr5:179110851-179345430	-	hsa:9509	ADAM metallopeptidase with thrombospondin type 1 motif, 2	2.16719	2.04739e-11	42	47	198	216
SIPA1	protein-coding	chr11:65640813-65649989	+	hsa:6494	signal-induced proliferation-associated 1	0.652615	1.41577e-08	875	1130	1601	1642
CHST14	protein-coding	chr15:40470961-40473158	+	hsa:113189	carbohydrate (N-acetylgalactosamine 4-0) sulfotransferase 14	0.627745	0.00027383	359	410	640	589
WBSCR28	protein-coding	chr7:73861550-73865892	+	hsa:135886	Williams-Beuren syndrome chromosome region 28	1.9681	0.000726833	18	12	65	59
PNPT1	protein-coding	chr2:55645349-55693853	-	hsa:87178	polyribonucleotide nucleotidyltransferase 1	-0.636949	0.00184956	448	432	280	313
LOC283335	lncRNA	chr12:53043189-53054438	-	hsa:283335	uncharacterized LOC283335	0.840759	0.0121818	58	96	125	156
AKR1C7P	pseudo	chr10:5275206-5285925	-		aldo-keto reductase family 1, member C7, pseudogene	-4.8954	0.0463942	7	3	0	0
TRR-TCG3-1	tRNA	chr17:75035113-75035185	+		transfer RNA-Arg (TCG) 3-1	4.86759	0.0463322	0	0	8	3
TWISTNB	protein-coding	chr7:19695462-19709037	-	hsa:221830	TWIST neighbor	-0.630966	0.00521935	320	319	212	219
ARHGAP23P1	pseudo	chr16:33905444-33936913	-		Rho GTPase activating protein 23 pseudogene 1	1.73196	0.000667238	24	20	64	90
TNFRSF10A	protein-coding	chr8:23191457-23225167	-	hsa:8797	tumor necrosis factor receptor superfamily, member 10a	-0.589879	0.00105535	480	590	393	339
KDELC2	protein-coding	chr11:108472106-108498432	-	hsa:143888	KDEL (Lys-Asp-Glu-Leu) containing 2	0.650899	3.15268e-05	389	524	756	714
LOC100129917	ncRNA	chr4:780149-781848	-	hsa:100129917	uncharacterized LOC100129917	0.947405	0.0215012	42	48	82	98
